# Supplementary material for: Decoding mechanism of action and sensitivity to drug candidates from integrated transcriptome and chromatin state
Source: eLife journal article supplement (doi:10.7554/elife.78012), 2022-08-16
Supplement: supp10 [file elife-78012-supp10-v2.pdf]

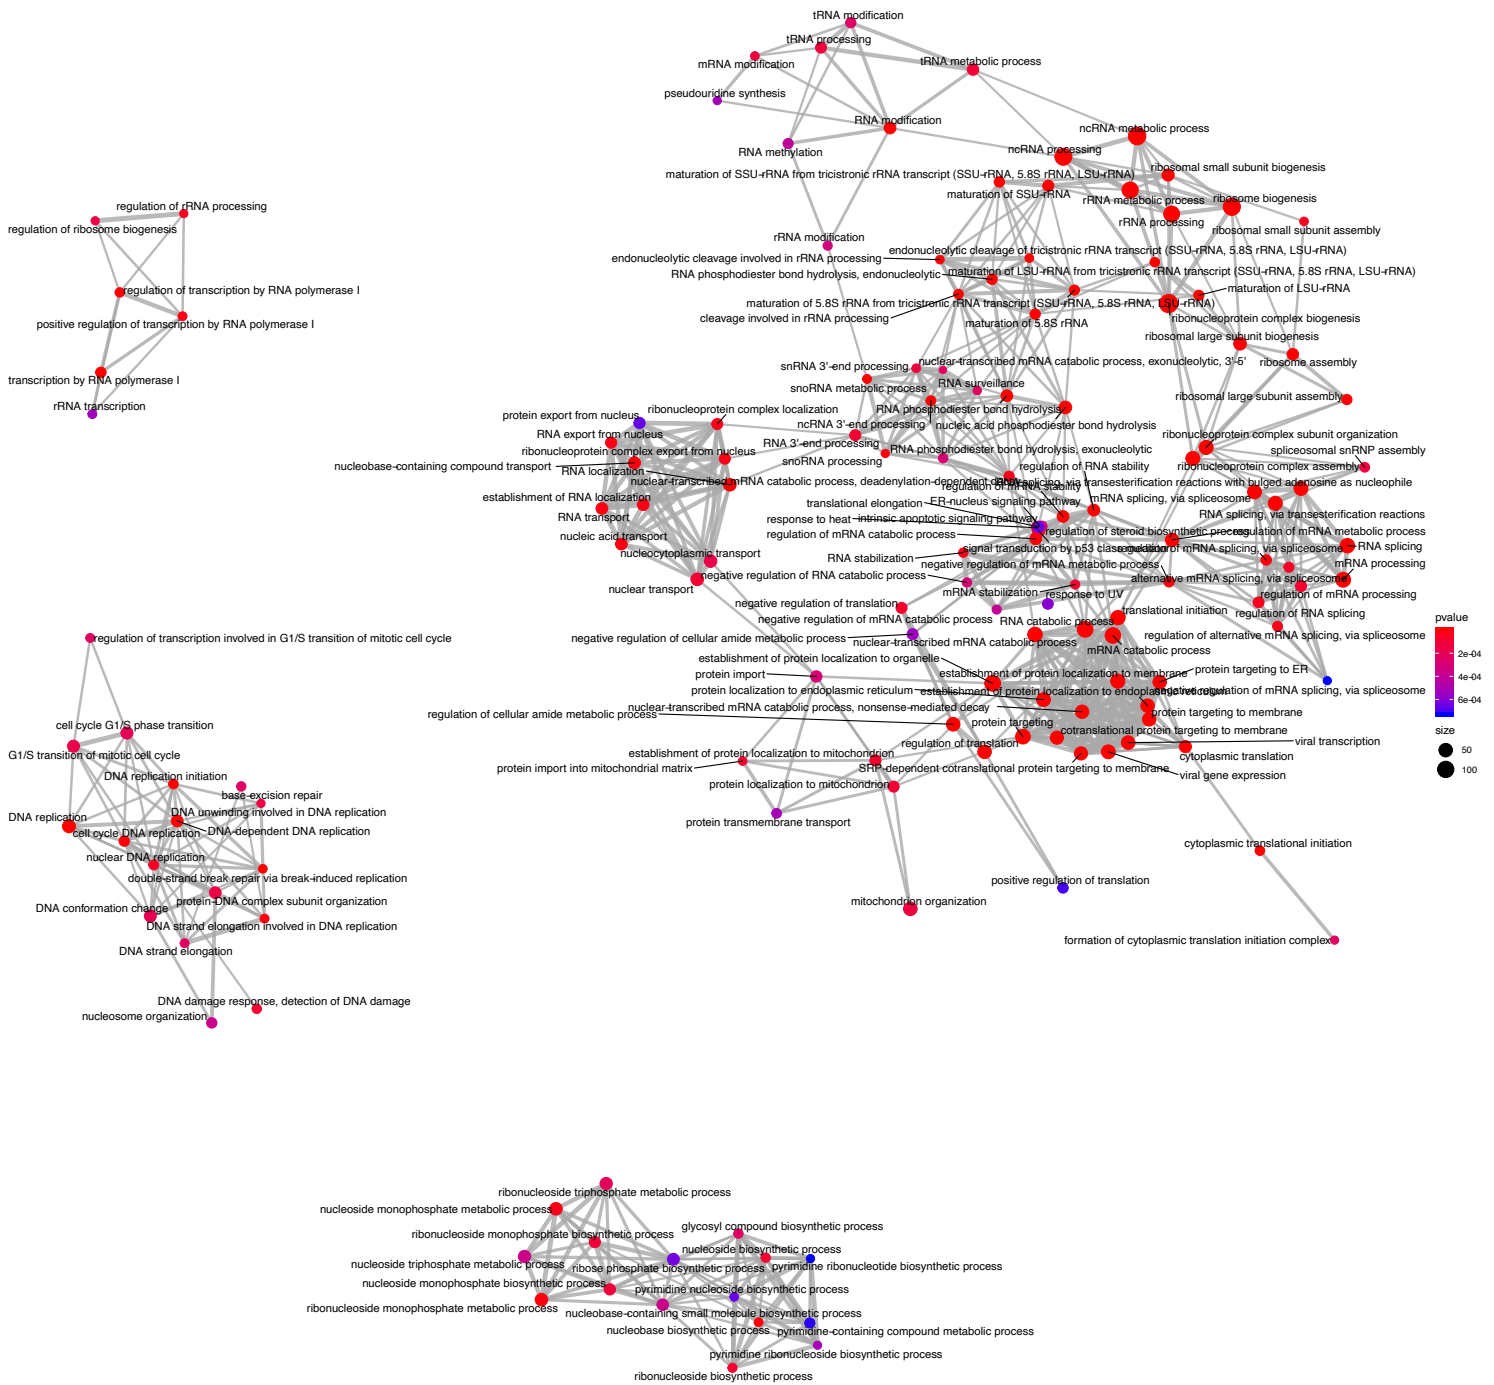

Map of the most significant GO terms (150 nodes) enriched in the union of DE genes upregulated in BxPC-3 cells after treatment (DE genes identified after 6 h and 12 h of treatment with both **M** and **B**).

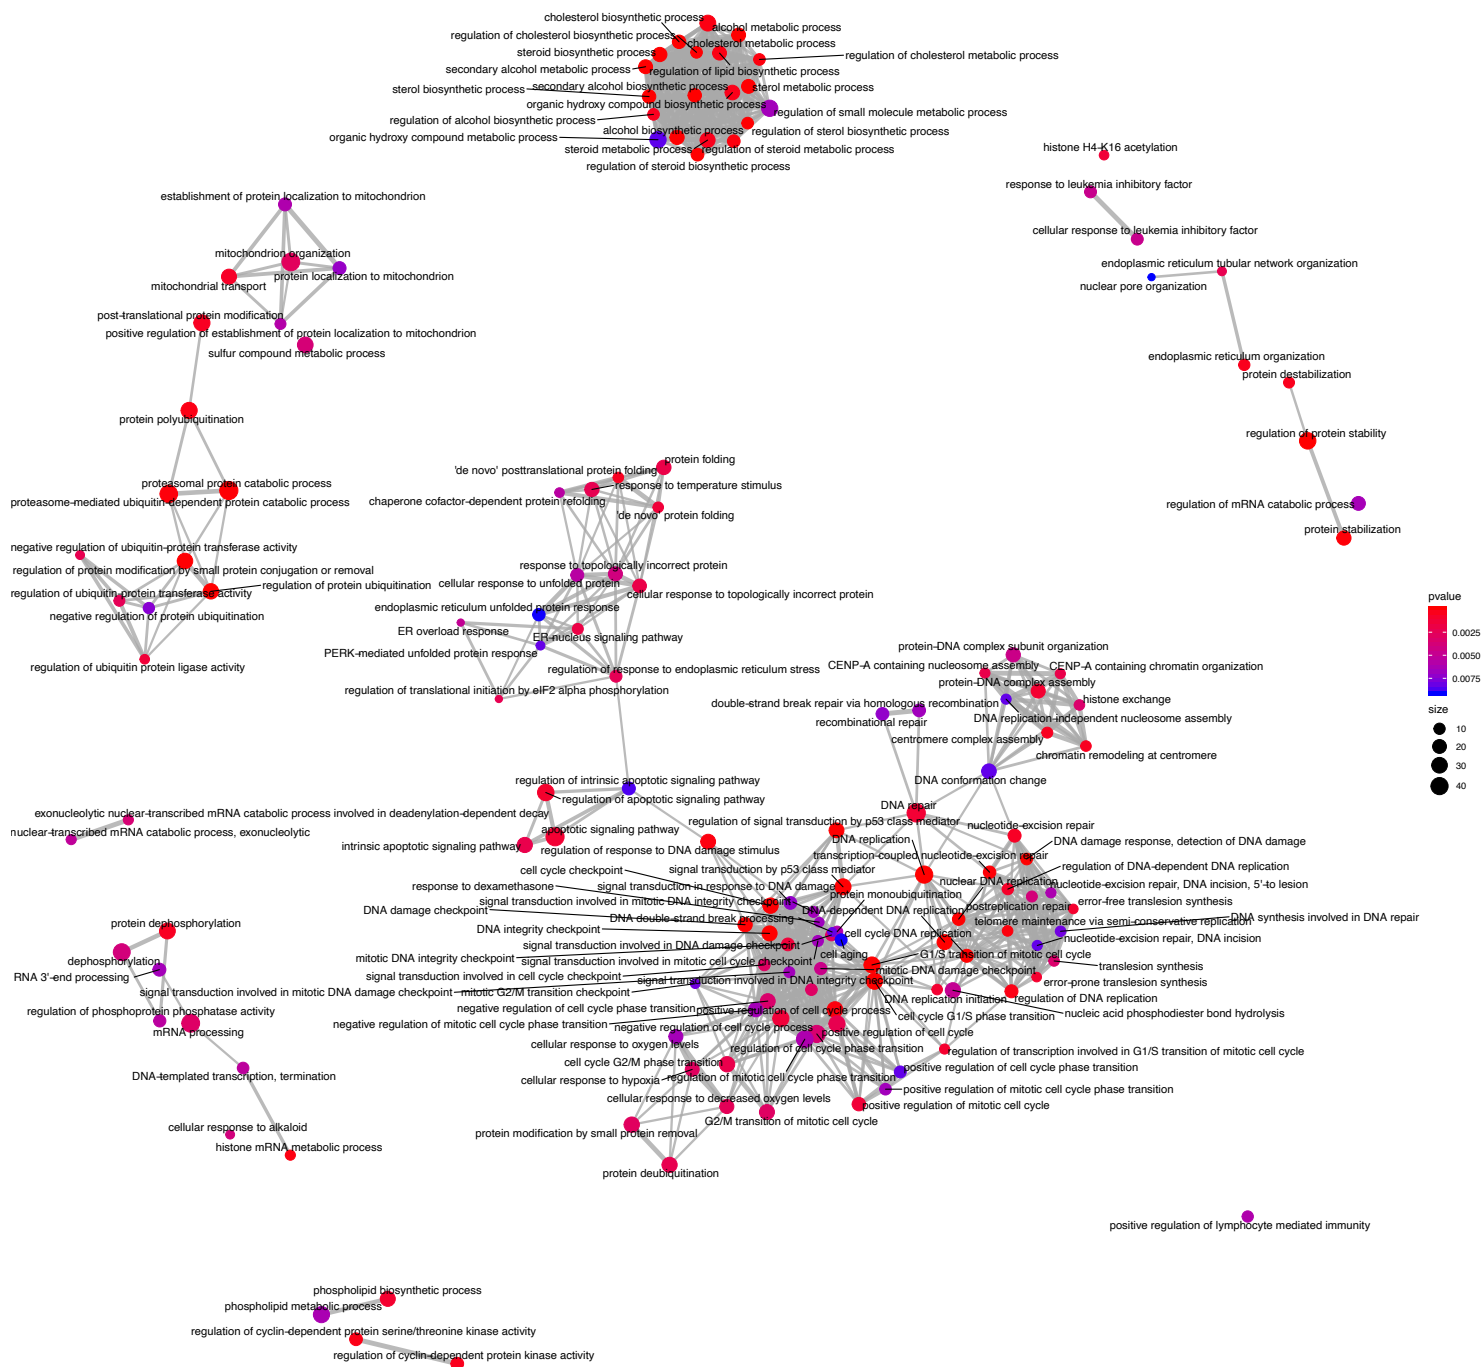

Map of the most significant GO terms (150 nodes) enriched in the union of DE genes upregulated in HCT-15 cells after treatment (DE genes identified after 6 h and 12 h of treatment with both **M** and **B**).

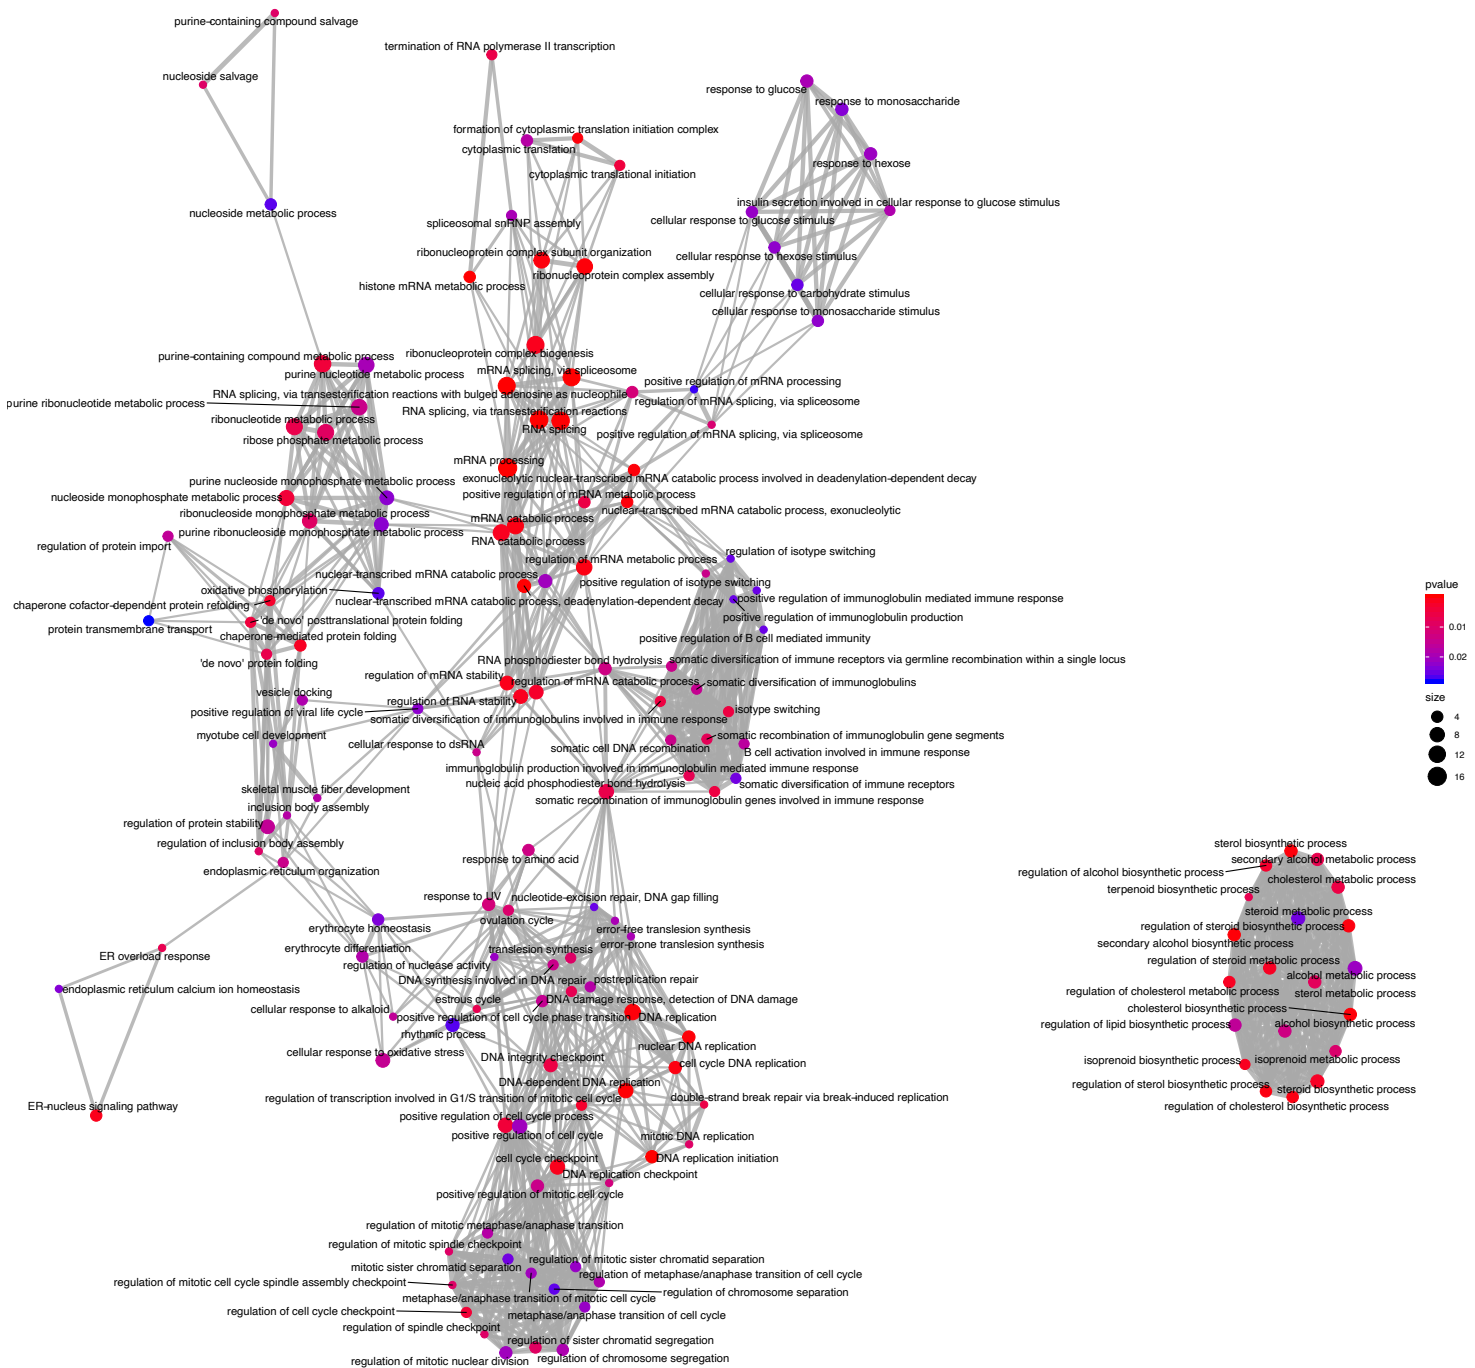

Map of the most significant GO terms (150 nodes) enriched in the union of shared DE genes upregulated in BxPC-3 and HCT-15 cells after treatment (DE genes identified after 6 h and 12 h of treatment with both **M** and **B**).

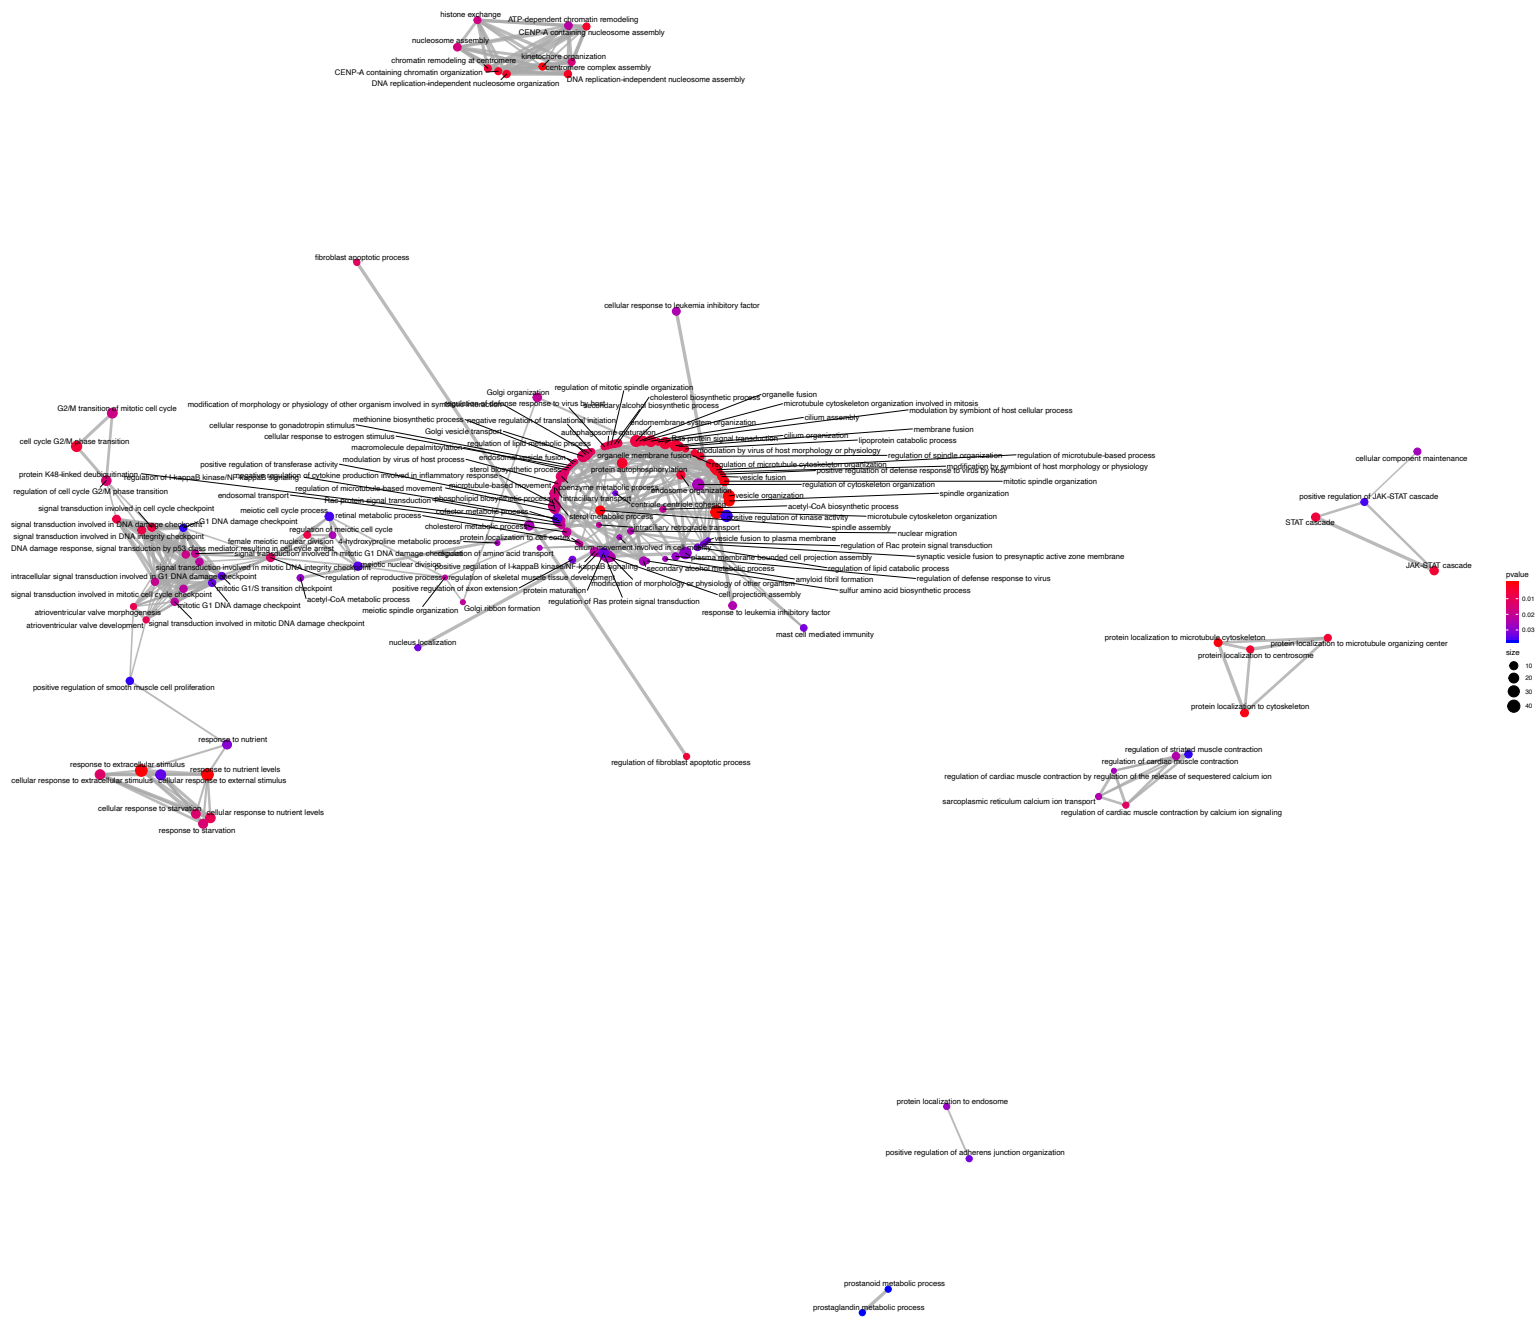

Map of the most significant GO terms (150 nodes) enriched in the union of DE genes downregulated in BxPC-3 cells after treatment (DE genes identified after 6 h and 12 h of treatment with both **M** and **B**).

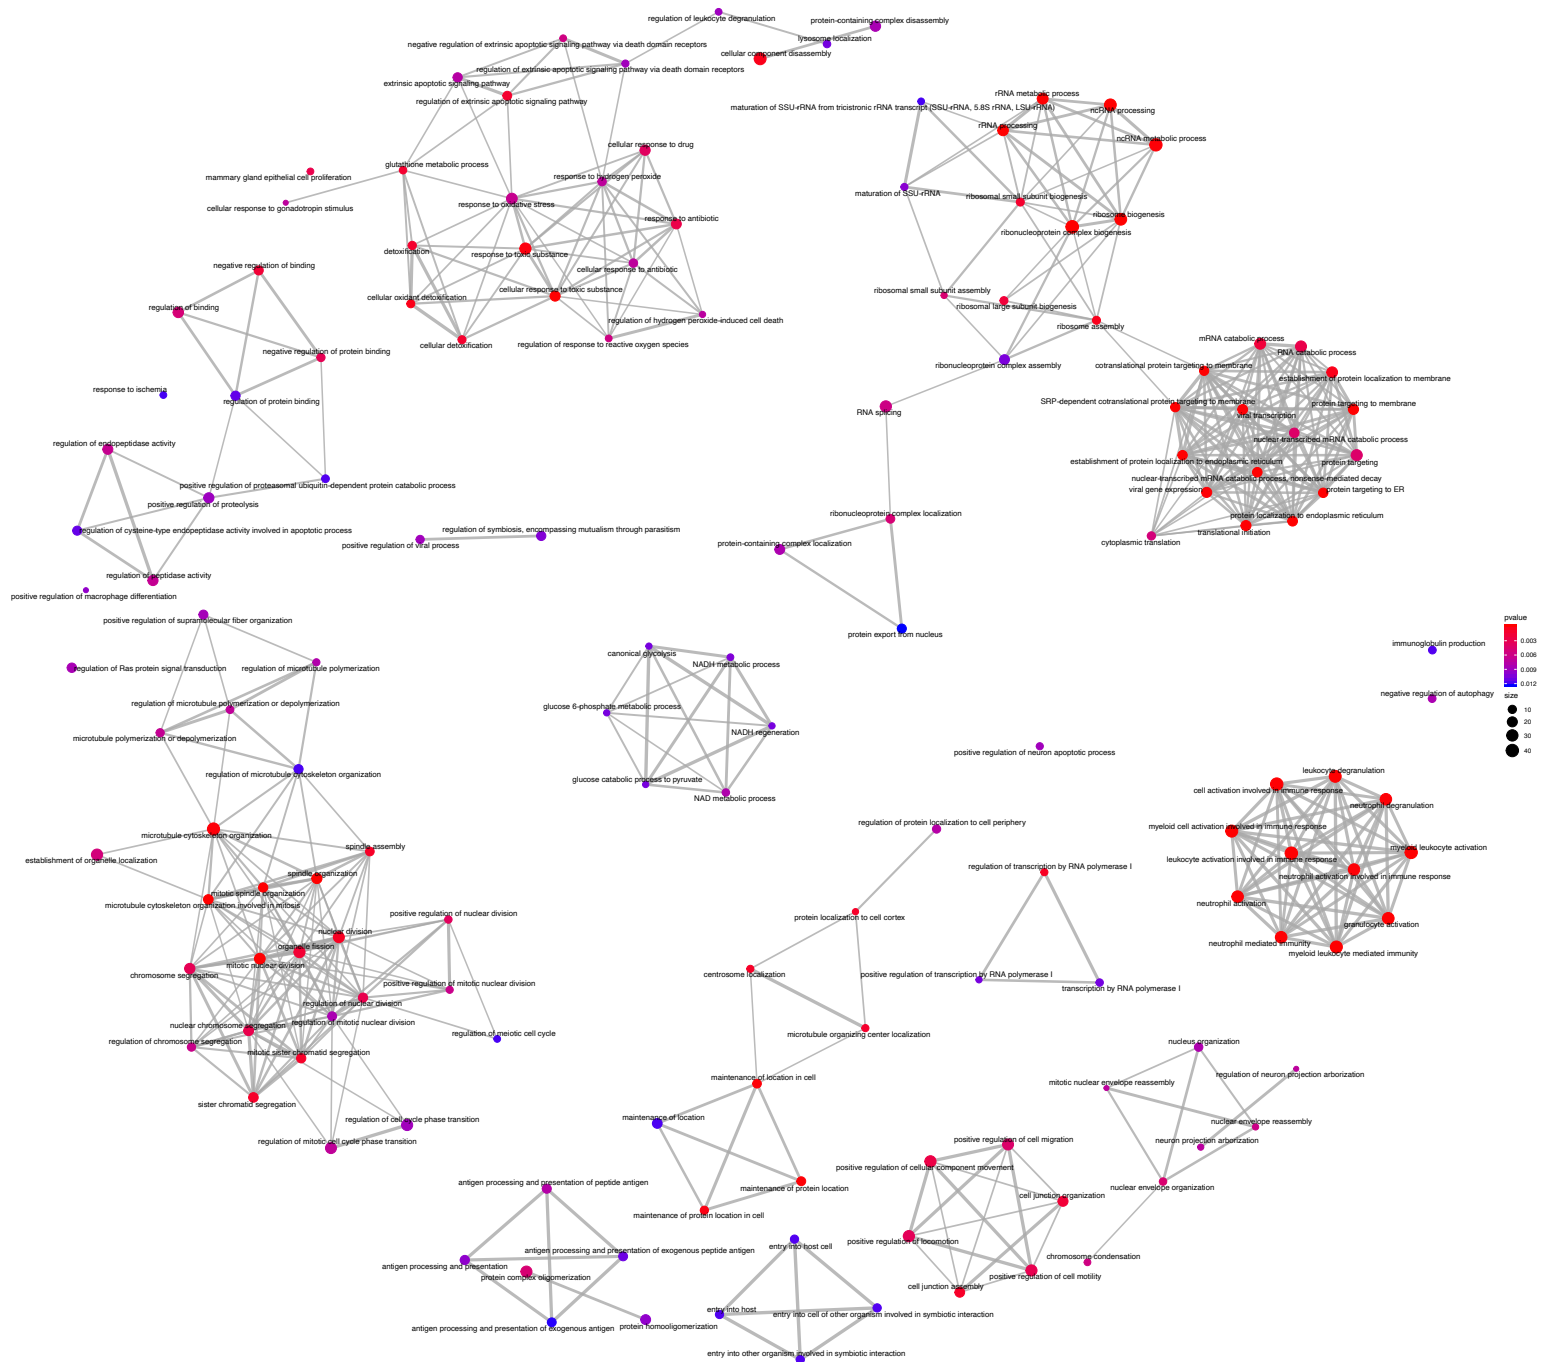

Map of the most significant GO terms (150 nodes) enriched in the union of DE genes downregulated in HCT-15 cells after treatment (DE genes identified after 6 h and 12 h of treatment with both **M** and **B**).

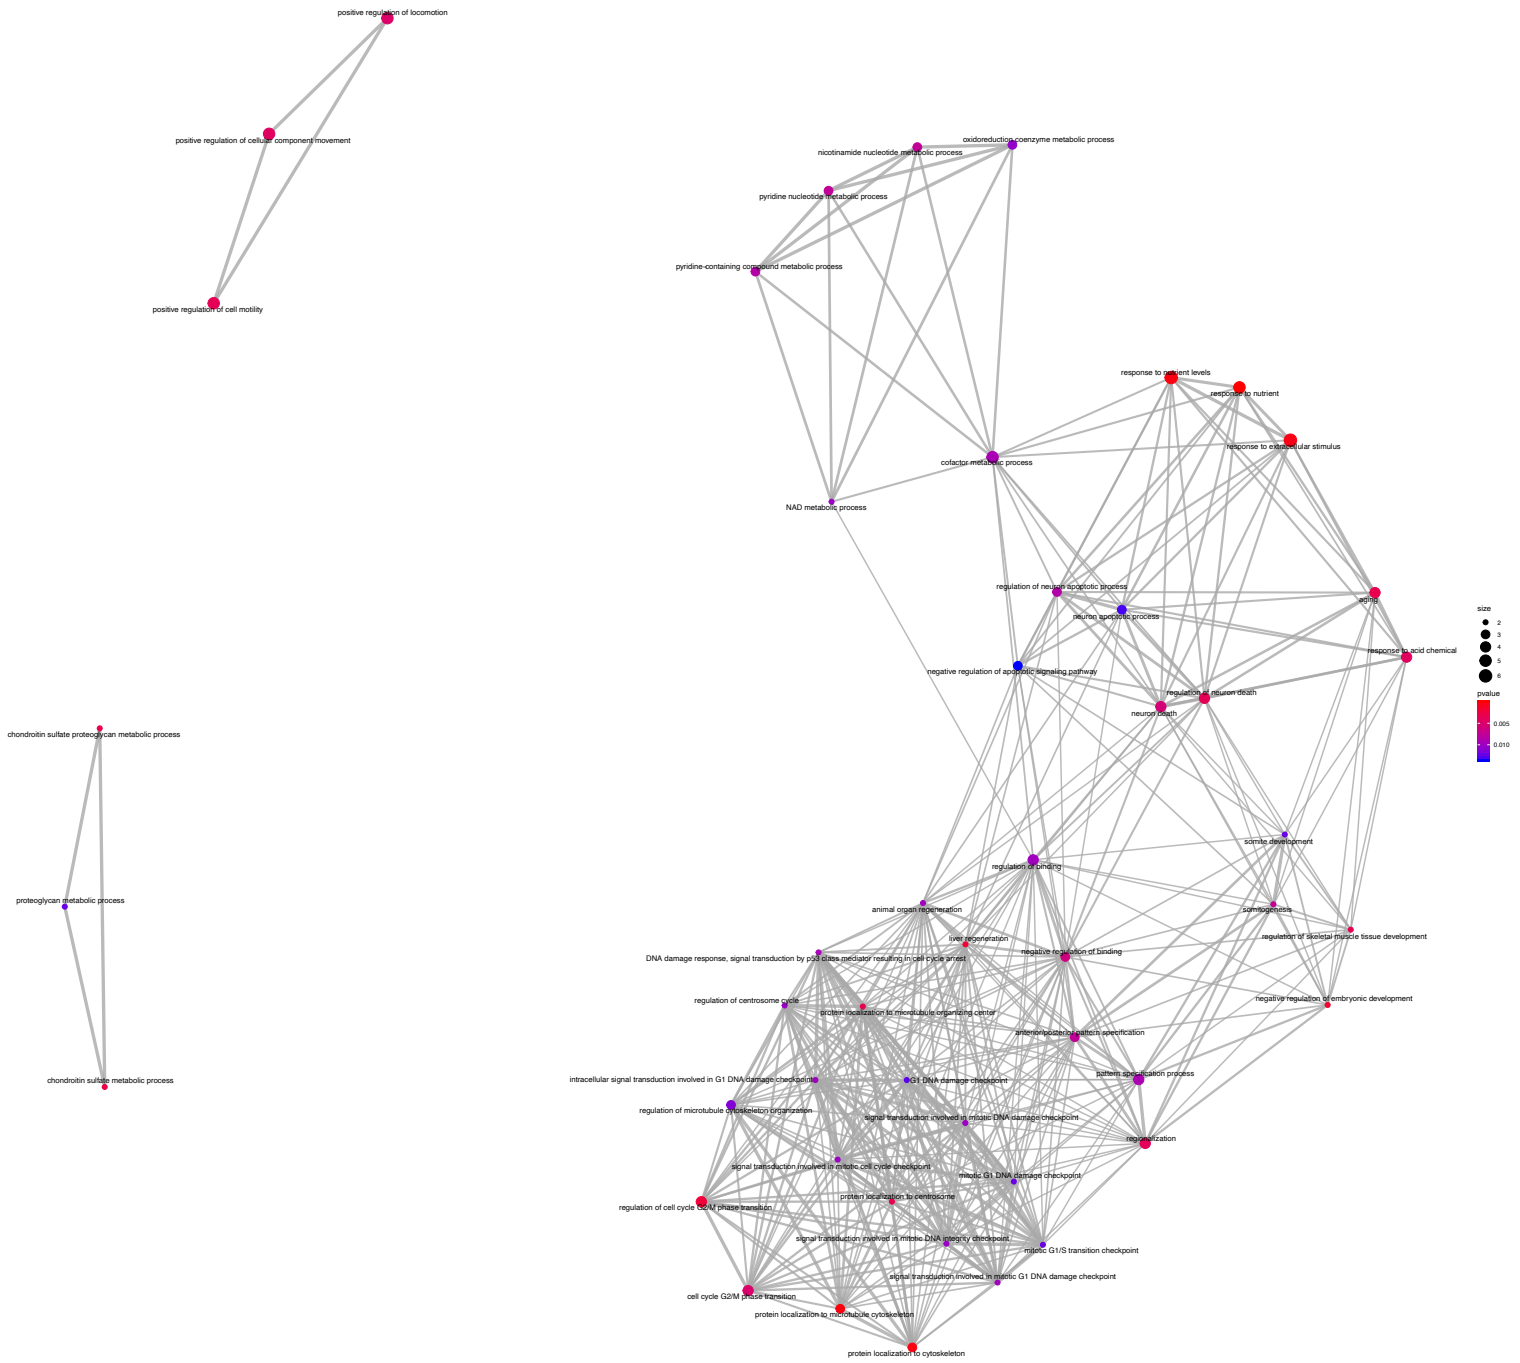

Map of the most significant GO terms (50 nodes) enriched in the union of shared DE genes downregulated in BxPC-3 and HCT-15 cells after treatment (DE genes identified after 6 h and 12 h of treatment with both **M** and **B**).
