# Supplementary material for: Decoding mechanism of action and sensitivity to drug candidates from integrated transcriptome and chromatin state
Source: eLife. 2022 Aug 31;11:e78012. doi: 10.7554/eLife.78012 (PMC9433094; doi:10.7554/eLife.78012)
Supplement: Supplementary file 1. [file elife-78012-supp1.xlsx]

## Sheet: GSEA_BspecUP
,"ID","Description","GeneRatio","BgRatio","pvalue","p.adjust","qvalue","geneID","Count"
GO:0042254,"GO:0042254","ribosome biogenesis","111/649","284/11852",3.56204216134668e-67,3.56204216134668e-67,1.36594943092484e-63,"NOP16/MRTO4/USP36/WDR3/NLE1/NOP14/DDX18/DDX24/PES1/SNU13/NOP56/FBL/GTPBP4/C1QBP/FTSJ3/UTP6/NOP2/PAK1IP1/MDN1/BYSL/BRIX1/RPL24/RRP9/WDR75/ZNHIT6/EBNA1BP2/RCL1/UTP20/DDX27/DKC1/NOL11/MYBBP1A/NIP7/WDR74/GNL2/WDR36/NAT10/URB2/IMP4/RPS24/WDR12/UTP4/NOB1/URB1/ISG20L2/LYAR/…
GO:0022613,"GO:0022613","ribonucleoprotein complex biogenesis","131/649","469/11852",3.20219147501523e-59,3.20219147501523e-59,6.13978081235816e-56,"NOP16/MRTO4/USP36/WDR3/NLE1/SART3/GEMIN5/NOP14/DDX18/DDX24/PES1/SNU13/EIF3D/PRMT5/NOP56/FBL/EIF3B/EIF3A/GTPBP4/C1QBP/FTSJ3/UTP6/NOP2/PAK1IP1/MDN1/BYSL/BRIX1/RPL24/RRP9/WDR75/ZNHIT6/PRPF3/EBNA1BP2/RCL1/UTP20/DDX27/CNOT1/DKC1/NOL11/MYBBP1A/NIP7/WDR74/E…
GO:0006364,"GO:0006364","rRNA processing","86/649","208/11852",3.19146125618264e-54,3.19146125618264e-54,4.07947135307837e-51,"MRTO4/USP36/WDR3/NOP14/DDX18/DDX24/PES1/SNU13/NOP56/FBL/GTPBP4/FTSJ3/UTP6/NOP2/MDN1/BYSL/RRP9/WDR75/ZNHIT6/EBNA1BP2/RCL1/UTP20/DDX27/DKC1/NOL11/WDR74/WDR36/NAT10/IMP4/RPS24/WDR12/UTP4/NOB1/URB1/ISG20L2/LYAR/RPL7L1/REXO4/PDCD11/SRFBP1/UTP14A/RRP1/FAM207A/WDR43/NOL6/DDX21/B…
GO:0016072,"GO:0016072","rRNA metabolic process","91/649","242/11852",4.06968625946097e-53,4.06968625946097e-53,3.90154395874114e-50,"MRTO4/USP36/WDR3/NOP14/DDX18/DDX24/PES1/SNU13/NOP56/FBL/GTPBP4/FTSJ3/UTP6/NOP2/MDN1/BYSL/RRP9/NCL/WDR75/ZNHIT6/EBNA1BP2/RCL1/UTP20/DDX27/POLR1B/IPPK/DKC1/NOL11/WDR74/WDR36/NAT10/IMP4/POLR1E/RPS24/WDR12/UTP4/NOB1/URB1/ISG20L2/LYAR/RPL7L1/REXO4/PDCD11/SRFBP1/UTP14A/R…
GO:0034470,"GO:0034470","ncRNA processing","106/649","354/11852",8.74708267194725e-51,8.74708267194725e-51,6.70855203661134e-48,"ELAC2/NSUN2/METTL1/MRTO4/USP36/WDR3/NOP14/DDX18/TRMT6/DDX24/PES1/SNU13/NOP56/POP1/FBL/GTPBP4/FTSJ3/UTP6/NOP2/MDN1/BYSL/RRP9/WDR75/ZNHIT6/EBNA1BP2/RCL1/UTP20/DDX27/DKC1/NOL11/WDR74/WDR36/NAT10/IMP4/RPS24/WDR12/UTP4/NOB1/URB1/ISG20L2/INTS7/LYAR/RPL7L1/REXO4/PDCD11/SRFBP1/…
GO:0034660,"GO:0034660","ncRNA metabolic process","117/649","496/11852",2.62720831157343e-44,2.62720831157343e-44,1.67910875071263e-41,"ELAC2/NSUN2/METTL1/MRTO4/USP36/WDR3/NOP14/DDX18/KHSRP/TRMT6/DDX24/CCNK/PES1/SNU13/NOP56/POP1/FBL/ELL/GTPBP4/FTSJ3/UTP6/NOP2/MDN1/BYSL/RRP9/NCL/WDR75/ZNHIT6/EBNA1BP2/RCL1/UTP20/DDX27/XPO5/POLR1B/IPPK/DKC1/NOL11/WDR74/WDR36/NAT10/IMP4/POLR1E/RPS24/WDR12/UTP4/NOB1/U…
GO:0045047,"GO:0045047","protein targeting to ER","48/649","108/11852",3.05908707427674e-32,3.05908707427674e-32,1.675827700991e-29,"HSPA5/CHMP4B/RPL24/RPS24/PMM2/SRP68/RPL38/RPL18/RPL31/RPS5/RPL3/RPS19/RPL18A/RPL34/RPS12/RPL22/RPS25/RPL23/RPL36/RPL27/RPS15A/RPL35/RPS6/RPL13A/RPL32/RPL37/RPL10/RPL7A/RPS3/RPL8/RPL29/RPS14/RPL27A/RPL13/RPS9/RPS21/RPS7/RPL4/RPL15/RPL35A/RPL37A/RPL23A/RPL10A/RPS29/UB…
GO:0006614,"GO:0006614","SRP-dependent cotranslational protein targeting to membrane","45/649","96/11852",1.50547139135862e-31,1.50547139135862e-31,7.21635826147297e-29,"RPL24/RPS24/SRP68/RPL38/RPL18/RPL31/RPS5/RPL3/RPS19/RPL18A/RPL34/RPS12/RPL22/RPS25/RPL23/RPL36/RPL27/RPS15A/RPL35/RPS6/RPL13A/RPL32/RPL37/RPL10/RPL7A/RPS3/RPL8/RPL29/RPS14/RPL27A/RPL13/RPS9/RPS21/RPS7/RPL4/RPL15/RPL35A/RPL37A/RPL…
GO:0072599,"GO:0072599","establishment of protein localization to endoplasmic reticulum","48/649","112/11852",2.434986212029e-31,2.434986212029e-31,1.03750348192066e-28,"HSPA5/CHMP4B/RPL24/RPS24/PMM2/SRP68/RPL38/RPL18/RPL31/RPS5/RPL3/RPS19/RPL18A/RPL34/RPS12/RPL22/RPS25/RPL23/RPL36/RPL27/RPS15A/RPL35/RPS6/RPL13A/RPL32/RPL37/RPL10/RPL7A/RPS3/RPL8/RPL29/RPS14/RPL27A/RPL13/RPS9/RPS21/RPS7/RPL4/RPL15…
GO:0006613,"GO:0006613","cotranslational protein targeting to membrane","45/649","100/11852",1.4086807126315e-30,1.4086807126315e-30,5.40191982749111e-28,"RPL24/RPS24/SRP68/RPL38/RPL18/RPL31/RPS5/RPL3/RPS19/RPL18A/RPL34/RPS12/RPL22/RPS25/RPL23/RPL36/RPL27/RPS15A/RPL35/RPS6/RPL13A/RPL32/RPL37/RPL10/RPL7A/RPS3/RPL8/RPL29/RPS14/RPL27A/RPL13/RPS9/RPS21/RPS7/RPL4/RPL15/RPL35A/RPL37A/RPL23A/RPL10A/RPS2…
GO:0000184,"GO:0000184","nuclear-transcribed mRNA catabolic process, nonsense-mediated decay","48/649","119/11852",7.15862234156911e-30,7.15862234156911e-30,2.49558480290299e-27,"RPL24/SMG7/ETF1/RPS24/RPL38/RNPS1/RPL18/RPL31/RPS5/RPL3/RPS19/RPL18A/RPL34/RPS12/RPL22/RPS25/RPL23/RPL36/RPL27/RPS15A/RPL35/RPS6/EIF4A3/RPL13A/RPL32/RPL37/RPL10/RPL7A/RPS3/RPL8/RPL29/RPS14/RPL27A/RPL13/RPS9/RPS21/RPS7/RP…
GO:0070972,"GO:0070972","protein localization to endoplasmic reticulum","50/649","133/11852",2.37038803962307e-29,2.37038803962307e-29,7.57484528802355e-27,"HSPA5/PPP1R15A/CHMP4B/RPL24/RPS24/PMM2/SEC16A/SRP68/RPL38/RPL18/RPL31/RPS5/RPL3/RPS19/RPL18A/RPL34/RPS12/RPL22/RPS25/RPL23/RPL36/RPL27/RPS15A/RPL35/RPS6/RPL13A/RPL32/RPL37/RPL10/RPL7A/RPS3/RPL8/RPL29/RPS14/RPL27A/RPL13/RPS9/RPS21/RPS7/RPL4/RP…
GO:0000956,"GO:0000956","nuclear-transcribed mRNA catabolic process","60/649","198/11852",4.49529396144519e-29,4.49529396144519e-29,1.32602072077286e-26,"SAMD4A/MRTO4/THRAP3/DDX5/RPL24/SMG7/ETF1/CNOT1/ZFP36/RPS24/NOCT/RPL38/NANOS1/RNPS1/RPL18/RPL31/EXOSC7/EXOSC5/RPS5/RPL3/RPS19/RPL18A/RPL34/RPS12/RPL22/RPS25/RPL23/RPL36/EXOSC2/RPL27/RPS15A/RPL35/RPS6/EIF4A3/RPL13A/RPL32/RPL37/RPL10/RPL7A/RPS3/RPL…
GO:0006413,"GO:0006413","translational initiation","57/649","179/11852",6.37023497980229e-29,6.37023497980229e-29,1.74486962642254e-26,"DHX33/PPP1R15A/EIF3D/EIF3B/EIF3A/RPL24/ATF4/EIF2S1/RPS24/METTL3/RPL38/EIF4EBP1/RPL18/RPL31/RPS5/RPL3/RPS19/RPL18A/EIF4H/RPL34/RPS12/RPL22/RPS25/RPL23/RPL36/RPL27/RPS15A/RPL35/RPS6/RPL13A/RPL32/RPL37/RPL10/RPL7A/RPS3/EIF4A2/RPL8/RPL29/RPS14/RPL27A/RPL13/RPS9/RPS21…
GO:0042273,"GO:0042273","ribosomal large subunit biogenesis","36/649","67/11852",3.60202017477896e-28,3.60202017477896e-28,9.20853298015421e-26,"NOP16/MRTO4/NLE1/DDX18/PES1/SNU13/GTPBP4/FTSJ3/NOP2/PAK1IP1/MDN1/BRIX1/RPL24/ZNHIT6/EBNA1BP2/NIP7/WDR74/WDR12/URB1/RPL7L1/RSL1D1/RPL38/RRS1/RPL3/RPL35/RPL10/SURF6/RPL7A/ZNF622/DDX28/RPL35A/RPL23A/RPL10A/EIF6/MRPL20/BOP1",36
GO:0019080,"GO:0019080","viral gene expression","55/649","185/11852",2.96225342090811e-26,2.96225342090811e-26,7.09966395550541e-24,"PTBP1/NUP160/NUP50/EIF3D/EIF3B/EIF3A/NUP98/RPL24/NUP153/ZFP36/RPS24/RPL38/JUN/TRIM27/RPL18/RPL31/RPS5/RPL3/RPS19/RPL18A/RPL34/RPS12/RPL22/RPS25/RPL23/RPL36/RPL27/RPS15A/RPL35/RPS6/RPL13A/RPL32/RPL37/RPL10/RPL7A/RPS3/RPL8/RPL29/RPS14/RPL27A/RPL13/RPS9/RPS21/RPS7/RPL4…
GO:0006401,"GO:0006401","RNA catabolic process","76/649","361/11852",3.03252219835981e-25,3.03252219835981e-25,6.84054388150142e-23,"SAMD4A/MRTO4/THRAP3/YBX1/PSME4/KHSRP/APEX1/E2F1/POP1/DDX5/ZPR1/RPL24/SMG7/ETF1/CNOT1/ZFP36/DKC1/RBM38/SYNCRIP/RPS24/NOCT/SUPV3L1/METTL3/RPL38/NANOS1/RNPS1/HNRNPR/RPL18/RPL31/EXOSC7/EXOSC5/RPS5/RPL3/RPS19/RPL18A/RPL34/RPS12/RPL22/RPS25/RPL23/RPL36/EXOSC2/RPL27/RPS15A…
GO:0006402,"GO:0006402","mRNA catabolic process","72/649","334/11852",1.34491498527969e-24,1.34491498527969e-24,2.86521946863972e-22,"SAMD4A/MRTO4/THRAP3/YBX1/PSME4/KHSRP/APEX1/E2F1/DDX5/RPL24/SMG7/ETF1/CNOT1/ZFP36/RBM38/SYNCRIP/RPS24/NOCT/SUPV3L1/METTL3/RPL38/NANOS1/RNPS1/HNRNPR/RPL18/RPL31/EXOSC7/EXOSC5/RPS5/RPL3/RPS19/RPL18A/RPL34/RPS12/RPL22/RPS25/RPL23/RPL36/EXOSC2/RPL27/RPS15A/TBRG4/RPL35/R…
GO:0019083,"GO:0019083","viral transcription","51/649","171/11852",1.74838291288359e-24,1.74838291288359e-24,3.52873072112739e-22,"NUP160/NUP50/NUP98/RPL24/NUP153/ZFP36/RPS24/RPL38/JUN/TRIM27/RPL18/RPL31/RPS5/RPL3/RPS19/RPL18A/RPL34/RPS12/RPL22/RPS25/RPL23/RPL36/RPL27/RPS15A/RPL35/RPS6/RPL13A/RPL32/RPL37/RPL10/RPL7A/RPS3/RPL8/RPL29/RPS14/RPL27A/RPL13/RPS9/RPS21/RPS7/RPL4/RPL15/RPL35A/RPL37A/RPL23…
GO:0042274,"GO:0042274","ribosomal small subunit biogenesis","31/649","64/11852",1.25151564572382e-22,1.25151564572382e-22,2.39961657756414e-20,"NOP14/UTP6/BYSL/RCL1/UTP20/NOL11/NAT10/RPS24/UTP4/NOB1/NOM1/SRFBP1/FAM207A/BMS1/TSR1/RPL38/RRS1/RPS5/RPS19/RIOK1/EMG1/MRPS9/RPS6/ABT1/SURF6/DHX37/RPS14/RPS21/RPS7/RRP7A/RPS28",31
GO:0006612,"GO:0006612","protein targeting to membrane","48/649","176/11852",2.98199042924774e-21,2.98199042924774e-21,5.4453088389722e-19,"HSPA5/MIEF1/CHMP4B/RPL24/RPS24/SRP68/RPL38/RPL18/RPL31/RPS5/RPL3/RPS19/RPL18A/RPL34/RPS12/RPL22/RPS25/RPL23/RPL36/RPL27/RPS15A/RPL35/RPS6/RPL13A/RPL32/RPL37/RPL10/RPL7A/RPS3/RPL8/RPL29/RPS14/RPL27A/RPL13/RPS9/RPS21/RPS7/RPL4/RPL15/RPL35A/RPL37A/RPL23A/RPL10A/…
GO:0072594,"GO:0072594","establishment of protein localization to organelle","82/649","486/11852",1.38225481011505e-20,1.38225481011505e-20,2.40935611160245e-18,"HSPA5/USP36/TIMM21/DNAJA1/HUWE1/PPP1R13B/NUP50/E2F1/CHMP4B/TIMM50/KPNB1/GRPEL1/ZPR1/NUP98/RPL24/NUP153/MED1/TOMM40/DKC1/RPS24/PMM2/HK2/NOLC1/SRP68/RPL38/DDIT3/FLNA/TFDP1/TIMM23/SCARB2/RPL18/HYAL2/RPL31/RPS5/TIMM13/TSPO/RPL3/TIMM44/RPS19/…
GO:0090150,"GO:0090150","establishment of protein localization to membrane","56/649","292/11852",7.49925095987023e-17,7.49925095987023e-17,1.25033278017424e-14,"HSPA5/PPP1R13B/MIEF1/E2F1/CHMP4B/GGA2/RPL24/RPS24/SEC16A/SRP68/RPL38/TFDP1/RPL18/RPL31/RPS5/TIMM13/RPL3/RPS19/RPL18A/RPL34/KRT18/RPS12/RPL22/RPS25/RPL23/RPL36/RPL27/RPS15A/RPL35/RPS6/RPL13A/RPL32/RPL37/RPL10/RPL7A/RPS3/RPL8/RPL29/RPS14/RP…
GO:0030490,"GO:0030490","maturation of SSU-rRNA","22/649","44/11852",8.39895743399757e-17,8.39895743399757e-17,1.34199131280935e-14,"NOP14/UTP6/BYSL/RCL1/UTP20/NOL11/NAT10/UTP4/NOB1/SRFBP1/FAM207A/BMS1/TSR1/RRS1/RPS19/RIOK1/MRPS9/ABT1/DHX37/RPS14/RPS21/RPS28",22
GO:0006605,"GO:0006605","protein targeting","64/649","391/11852",1.46868709605002e-15,1.46868709605002e-15,2.25281140669905e-13,"HSPA5/USP36/TIMM21/HUWE1/MIEF1/CHMP4B/TIMM50/GRPEL1/RPL24/TOMM40/RPS24/PMM2/SRP68/RPL38/TIMM23/SCARB2/RPL18/RPL31/RPS5/TIMM13/TSPO/RPL3/TIMM44/RPS19/RPL18A/RPL34/FBXW7/RPS12/RPL22/RPS25/RPL23/RPL36/RPL27/RPS15A/RPL35/RPS6/RPL13A/RPL32/RPL37/RPL10/RPL7A/RPS3/RPL8/RPL29/C…
GO:0042255,"GO:0042255","ribosome assembly","23/649","58/11852",9.46120542733666e-15,9.46120542733666e-15,1.39543203934362e-12,"MRTO4/NLE1/C1QBP/NOP2/MDN1/BRIX1/RPL24/NIP7/RPL38/RRS1/RPS5/RPL3/RPS19/ABT1/RPL10/RPS14/DDX28/RRP7A/RPL23A/RPS28/EIF6/MRPL20/BOP1",23
GO:0002181,"GO:0002181","cytoplasmic translation","28/649","92/11852",3.11964821705127e-14,3.11964821705127e-14,4.43075183419797e-12,"EIF3D/EIF3B/EIF3A/RPL24/ETF1/METTL3/RPL38/EIF4EBP1/RPL18/RPL31/RPL18A/EIF4H/RPL36/DPH2/RPL13A/RPL32/DPH7/EIF4A2/RPL8/RPL29/RPS21/RPL15/RPL35A/DRG1/RPL10A/RPS29/RPL41/RPS28",28
GO:0000470,"GO:0000470","maturation of LSU-rRNA","14/649","21/11852",1.54809035200163e-13,1.54809035200163e-13,2.12018539561728e-11,"DDX18/PES1/SNU13/GTPBP4/FTSJ3/ZNHIT6/WDR12/URB1/RPL7L1/RSL1D1/RPL35/RPL7A/RPL10A/BOP1",14
GO:0022618,"GO:0022618","ribonucleoprotein complex assembly","46/649","252/11852",3.19856883737094e-13,3.19856883737094e-13,4.22954129747453e-11,"MRTO4/NLE1/SART3/GEMIN5/SNU13/EIF3D/PRMT5/EIF3B/EIF3A/C1QBP/NOP2/MDN1/BRIX1/RPL24/ZNHIT6/PRPF3/CNOT1/NIP7/EIF2S1/TGS1/NOCT/SF1/RPL38/SART1/RUVBL1/RRS1/SF3A3/LUC7L/RPS5/RPL3/RPS19/EIF4H/WDR77/SNRPB/RPL13A/ABT1/RPL10/RPS14/SNRPD1/DDX28/RRP7A/RPL23A/RPS28/…
GO:0071826,"GO:0071826","ribonucleoprotein complex subunit organization","47/649","265/11852",5.25238461176706e-13,5.25238461176706e-13,6.71383759321663e-11,"MRTO4/NLE1/SART3/GEMIN5/SNU13/EIF3D/PRMT5/EIF3B/EIF3A/C1QBP/NOP2/MDN1/BRIX1/RPL24/ZNHIT6/PRPF3/CNOT1/NIP7/EIF2S1/TGS1/MRRF/NOCT/SF1/RPL38/SART1/RUVBL1/RRS1/SF3A3/LUC7L/RPS5/RPL3/RPS19/EIF4H/WDR77/SNRPB/RPL13A/ABT1/RPL10/RPS14/SNRPD1/DDX28/RR…
GO:0000462,"GO:0000462","maturation of SSU-rRNA from tricistronic rRNA transcript (SSU-rRNA, 5.8S rRNA, LSU-rRNA)","16/649","33/11852",2.65912555119098e-12,2.65912555119098e-12,3.28936990933404e-10,"NOP14/UTP6/BYSL/RCL1/UTP20/UTP4/FAM207A/BMS1/TSR1/RRS1/RPS19/MRPS9/ABT1/DHX37/RPS14/RPS21",16
GO:0000460,"GO:0000460","maturation of 5.8S rRNA","14/649","26/11852",9.94952349955836e-12,9.94952349955836e-12,1.19230638516089e-09,"NOP14/PES1/FTSJ3/RCL1/UTP20/WDR12/URB1/RRS1/EXOSC7/EXOSC2/ABT1/RPS21/EXOSC4/BOP1",14
GO:0000466,"GO:0000466","maturation of 5.8S rRNA from tricistronic rRNA transcript (SSU-rRNA, 5.8S rRNA, LSU-rRNA)","13/649","22/11852",1.11452428002706e-11,1.11452428002706e-11,1.29512342970927e-09,"NOP14/PES1/FTSJ3/RCL1/UTP20/WDR12/URB1/RRS1/EXOSC7/EXOSC2/ABT1/RPS21/BOP1",13
GO:0000027,"GO:0000027","ribosomal large subunit assembly","14/649","28/11852",3.73022525623425e-11,3.73022525623425e-11,4.20718594689207e-09,"MRTO4/NLE1/NOP2/MDN1/BRIX1/RPL24/RPL38/RRS1/RPL3/RPL10/DDX28/RPL23A/MRPL20/BOP1",14
GO:0000463,"GO:0000463","maturation of LSU-rRNA from tricistronic rRNA transcript (SSU-rRNA, 5.8S rRNA, LSU-rRNA)","10/649","14/11852",1.85790058338022e-10,1.85790058338022e-10,2.03558851887342e-08,"DDX18/PES1/GTPBP4/FTSJ3/ZNHIT6/WDR12/URB1/RPL7L1/RPL35/BOP1",10
GO:0006360,"GO:0006360","transcription by RNA polymerase I","17/649","58/11852",6.9651999996933e-09,6.9651999996933e-09,7.4193636254043e-07,"DHX33/POLR1A/NCL/WDR75/POLR1B/MED1/IPPK/ATF4/NOL11/POLR1E/WDR43/FLNA/ERCC6/RRN3/UTP15/POLR1C/CAVIN1",17
GO:0008380,"GO:0008380","RNA splicing","51/649","418/11852",5.32869741883791e-08,5.32869741883791e-08,5.52274386822945e-06,"PTBP1/THRAP3/SNRNP40/YBX1/SART3/GPATCH1/GEMIN5/KHSRP/SNU13/PRMT5/ACIN1/PNN/RBM28/C1QBP/DDX5/SUPT6H/DHX15/ZPR1/NUP98/SRSF7/SRSF4/PRPF3/RBM25/RBM19/AHNAK/SYMPK/RBM38/SYNCRIP/PRPF4/TGS1/CCAR2/METTL3/SF1/PCBP1/SART1/ZBTB7A/SF3A3/DDX42/RNPS1/HNRNPR/LUC7L/PPIE/WDR77/SNRPB/RBM39/EI…
GO:0000469,"GO:0000469","cleavage involved in rRNA processing","10/649","22/11852",8.03504806999124e-08,8.03504806999124e-08,8.10849864791637e-06,"NOP14/RCL1/UTP20/NOB1/RRS1/EXOSC7/EXOSC2/ABT1/RPS21/BOP1",10
GO:0006397,"GO:0006397","mRNA processing","55/649","474/11852",8.80634604061721e-08,8.80634604061721e-08,8.65897938622631e-06,"PTBP1/THRAP3/SNRNP40/YBX1/SART3/GPATCH1/GEMIN5/KHSRP/SNU13/PRMT5/ACIN1/PNN/RBM28/C1QBP/DDX5/SUPT6H/DHX15/ZPR1/NUP98/SRSF7/SRSF4/PRPF3/RBM25/RBM19/SYMPK/SAFB2/RBM38/SYNCRIP/PRPF4/TGS1/PDCD11/NOCT/CCAR2/SAFB/METTL3/SF1/PCBP1/SART1/ZBTB7A/SF3A3/DDX42/RNPS1/HNRNPR/LUC7L/PPIE/…
GO:0006417,"GO:0006417","regulation of translation","42/649","320/11852",1.10918832690979e-07,1.10918832690979e-07,1.06336133550852e-05,"SAMD4A/JMJD4/GEMIN5/PPP1R15A/KHSRP/EIF3D/EIF3B/C1QBP/NCL/ETF1/CNOT1/ZFP36/ATF4/ILF3/EIF2S1/SYNCRIP/NAT10/THBS1/RPUSD4/METTL3/NOLC1/PA2G4/RPL38/EIF4EBP1/NANOS1/HNRNPR/GUF1/EIF4H/RPL22/TRAP1/EIF5A/DPH2/EIF4A3/RPL13A/RPL10/DPH7/RPS3/EIF4A2/RPS14/RPS9/RACK1/EIF6",42
GO:0000375,"GO:0000375","RNA splicing, via transesterification reactions","43/649","340/11852",2.25230904495635e-07,2.25230904495635e-07,2.10658840841489e-05,"PTBP1/THRAP3/SNRNP40/YBX1/SART3/GPATCH1/GEMIN5/KHSRP/SNU13/PRMT5/PNN/C1QBP/DDX5/DHX15/NUP98/SRSF7/SRSF4/PRPF3/RBM25/RBM19/SYMPK/SYNCRIP/PRPF4/TGS1/METTL3/SF1/PCBP1/SART1/ZBTB7A/SF3A3/DDX42/RNPS1/HNRNPR/LUC7L/PPIE/WDR77/SNRPB/EIF4A3/SRSF2/SN…
GO:0006403,"GO:0006403","RNA localization","31/649","208/11852",3.26804905221205e-07,3.26804905221205e-07,2.98383526245827e-05,"NUP160/KHSRP/NUP50/FBL/SUPT6H/NUP98/SRSF7/SRSF4/SMG7/ZNHIT6/XPO5/NUP153/SYMPK/ZFP36/DKC1/NXF1/NOL6/RUVBL1/RRS1/RNPS1/CETN3/NOP58/EXOSC2/EIF5A/NXT1/EIF4A3/ZNF593/CCT6A/SRSF2/NOP10/EIF6",31
GO:0000478,"GO:0000478","endonucleolytic cleavage involved in rRNA processing","7/649","11/11852",3.89085622414433e-07,3.89085622414433e-07,3.391002206832e-05,"NOP14/RCL1/UTP20/RRS1/ABT1/RPS21/BOP1",7
GO:0000479,"GO:0000479","endonucleolytic cleavage of tricistronic rRNA transcript (SSU-rRNA, 5.8S rRNA, LSU-rRNA)","7/649","11/11852",3.89085622414433e-07,3.89085622414433e-07,3.391002206832e-05,"NOP14/RCL1/UTP20/RRS1/ABT1/RPS21/BOP1",7
GO:0000377,"GO:0000377","RNA splicing, via transesterification reactions with bulged adenosine as nucleophile","42/649","337/11852",4.66630198780502e-07,4.66630198780502e-07,3.8900087280489e-05,"PTBP1/THRAP3/SNRNP40/YBX1/SART3/GPATCH1/GEMIN5/SNU13/PRMT5/PNN/C1QBP/DDX5/DHX15/NUP98/SRSF7/SRSF4/PRPF3/RBM25/RBM19/SYMPK/SYNCRIP/PRPF4/TGS1/METTL3/SF1/PCBP1/SART1/ZBTB7A/SF3A3/DDX42/RNPS1/HNRNPR/LUC7L/PP…
GO:0000398,"GO:0000398","mRNA splicing, via spliceosome","42/649","337/11852",4.66630198780502e-07,4.66630198780502e-07,3.8900087280489e-05,"PTBP1/THRAP3/SNRNP40/YBX1/SART3/GPATCH1/GEMIN5/SNU13/PRMT5/PNN/C1QBP/DDX5/DHX15/NUP98/SRSF7/SRSF4/PRPF3/RBM25/RBM19/SYMPK/SYNCRIP/PRPF4/TGS1/METTL3/SF1/PCBP1/SART1/ZBTB7A/SF3A3/DDX42/RNPS1/HNRNPR/LUC7L/PPIE/WDR77/SNRPB/EIF4A3/SRSF2/SNRPD1/PLRG1/PUF60/DBR1",42
GO:1903311,"GO:1903311","regulation of mRNA metabolic process","37/649","282/11852",6.45677519498733e-07,6.45677519498733e-07,5.26809228115092e-05,"PTBP1/SAMD4A/THRAP3/YBX1/PSME4/SART3/KHSRP/APEX1/E2F1/C1QBP/DDX5/SUPT6H/NUP98/SRSF7/SRSF4/RBM25/RBM19/CNOT1/ZFP36/SAFB2/RBM38/SYNCRIP/NOCT/SAFB/METTL3/ZBTB7A/NANOS1/RNPS1/HNRNPR/EXOSC7/EXOSC5/EXOSC2/TBRG4/PSMA5/SRSF2/EXOSC4/UBA52",37
GO:0043628,"GO:0043628","ncRNA 3'-end processing","11/649","34/11852",1.09722934556581e-06,1.09722934556581e-06,8.76580374100055e-05,"ELAC2/FBL/DKC1/INTS7/EXOSC7/EXOSC5/EXOSC2/TOE1/POLR3K/RPS21/EXOSC4",11
GO:0006356,"GO:0006356","regulation of transcription by RNA polymerase I","10/649","28/11852",1.20787934575475e-06,1.20787934575475e-06,9.452855975477e-05,"DHX33/NCL/WDR75/MED1/IPPK/ATF4/NOL11/WDR43/FLNA/UTP15",10
GO:0009451,"GO:0009451","RNA modification","24/649","148/11852",1.52554549277495e-06,1.52554549277495e-06,0.000117001310109034,"NSUN2/METTL1/TRMT6/FBL/FTSJ3/NOP2/DKC1/NAT10/TGS1/WDR4/RPUSD4/METTL3/TRMT61A/PUS1/BUD23/TRMU/TRMT1/PUS3/MRM2/EMG1/QTRT2/ELP5/CTU2/NOP10",24
GO:0090501,"GO:0090501","RNA phosphodiester bond hydrolysis","22/649","130/11852",1.99954054272433e-06,1.99954054272433e-06,0.000150347289930748,"ELAC2/NOP14/APEX1/POP1/RCL1/UTP20/CNOT1/NOB1/ISG20L2/NOCT/RRS1/EXOSC7/EXOSC5/EXOSC2/TOE1/ABT1/POLR3K/FEN1/RPS21/EXOSC4/BOP1/DBR1",22
GO:0034248,"GO:0034248","regulation of cellular amide metabolic process","43/649","370/11852",2.26254663854273e-06,2.26254663854273e-06,0.000166851364457716,"SAMD4A/TIGAR/JMJD4/GEMIN5/PPP1R15A/KHSRP/EIF3D/EIF3B/C1QBP/NCL/ETF1/CNOT1/ZFP36/ATF4/ILF3/EIF2S1/SYNCRIP/NAT10/THBS1/RPUSD4/METTL3/NOLC1/PA2G4/RPL38/EIF4EBP1/NANOS1/HNRNPR/GUF1/EIF4H/RPL22/TRAP1/EIF5A/DPH2/EIF4A3/RPL13A/RPL10/DPH7/RPS3/EIF4A…
GO:0046112,"GO:0046112","nucleobase biosynthetic process","8/649","19/11852",3.41523478918265e-06,3.41523478918265e-06,0.000247104276802232,"CAD/MTHFD1/DHODH/UMPS/MTHFD1L/GART/CTPS1/PRPS1",8
GO:0016074,"GO:0016074","snoRNA metabolic process","7/649","15/11852",6.25208354489206e-06,6.25208354489206e-06,0.000443983242768845,"FBL/DKC1/NOLC1/EXOSC5/EXOSC2/EXOSC4/NOP10",7
GO:0045943,"GO:0045943","positive regulation of transcription by RNA polymerase I","8/649","21/11852",8.3371354942532e-06,8.3371354942532e-06,0.000581285829771567,"DHX33/NCL/WDR75/IPPK/ATF4/NOL11/WDR43/UTP15",8
GO:0006260,"GO:0006260","DNA replication","32/649","258/11852",1.21140263965915e-05,1.21140263965915e-05,0.000829537559450808,"LIG3/MCM2/POLD3/ORC1/SUPT16H/CLSPN/DNAJA3/MCM4/GRWD1/DNAJC2/TWNK/GTPBP4/ZPR1/NUP98/MCM3/MSH6/GINS2/NASP/HMGA1/SDE2/SSRP1/MCM7/CHAF1A/JUN/TOP1MT/RBM14/FBXW7/RPA2/POLE3/FEN1/SETMAR/MCMBP",32
GO:0000028,"GO:0000028","ribosomal small subunit assembly","7/649","17/11852",1.71562507650613e-05,1.71562507650613e-05,0.0011542053838803,"RPL38/RPS5/RPS19/ABT1/RPS14/RRP7A/RPS28",7
GO:2000232,"GO:2000232","regulation of rRNA processing","6/649","12/11852",1.83244898215758e-05,1.83244898215758e-05,0.00121154476261344,"USP36/WDR75/WDR43/BUD23/RIOK1/UTP15",6
GO:0006405,"GO:0006405","RNA export from nucleus","20/649","128/11852",1.98292414775452e-05,1.98292414775452e-05,0.00128881225160923,"NUP160/NUP50/SUPT6H/NUP98/SRSF7/SRSF4/SMG7/XPO5/NUP153/SYMPK/NXF1/NOL6/RRS1/RNPS1/EIF5A/NXT1/EIF4A3/ZNF593/SRSF2/EIF6",20
GO:0009156,"GO:0009156","ribonucleoside monophosphate biosynthetic process","21/649","140/11852",2.34017041670488e-05,2.34017041670488e-05,0.00149565628562384,"AK2/NUP160/PKM/TIGAR/CAD/NUP50/DHODH/OGDH/NUP98/UMPS/NUP153/UCK2/ALDOA/GART/HK2/IMPDH2/ZBTB7A/PRPS1/UQCC3/TMSB4X/EIF6",21
GO:0071426,"GO:0071426","ribonucleoprotein complex export from nucleus","19/649","120/11852",2.62975203499341e-05,2.62975203499341e-05,0.00165318147773615,"NUP160/NUP50/SUPT6H/NUP98/SRSF7/SRSF4/SMG7/NUP153/SYMPK/NXF1/NOL6/RRS1/RNPS1/EIF5A/NXT1/EIF4A3/ZNF593/SRSF2/EIF6",19
GO:0071166,"GO:0071166","ribonucleoprotein complex localization","19/649","121/11852",2.96333572131322e-05,2.96333572131322e-05,0.00183284075258813,"NUP160/NUP50/SUPT6H/NUP98/SRSF7/SRSF4/SMG7/NUP153/SYMPK/NXF1/NOL6/RRS1/RNPS1/EIF5A/NXT1/EIF4A3/ZNF593/SRSF2/EIF6",19
GO:0015931,"GO:0015931","nucleobase-containing compound transport","27/649","210/11852",3.04083172417761e-05,3.04083172417761e-05,0.00185091895926133,"NUP160/KHSRP/NUP50/SUPT6H/NUP98/SRSF7/SRSF4/SMG7/XPO5/NUP153/SLC25A19/SYMPK/ZFP36/RIPK1/EPG5/NXF1/NOL6/RRS1/RNPS1/CETN3/SLC25A17/EIF5A/NXT1/EIF4A3/ZNF593/SRSF2/EIF6",27
GO:0090502,"GO:0090502","RNA phosphodiester bond hydrolysis, endonucleolytic","13/649","65/11852",4.13755395003256e-05,4.13755395003256e-05,0.00247912977631063,"ELAC2/NOP14/APEX1/POP1/RCL1/UTP20/NOB1/RRS1/ABT1/FEN1/RPS21/BOP1/DBR1",13
GO:0090069,"GO:0090069","regulation of ribosome biogenesis","6/649","14/11852",5.41751909875487e-05,5.41751909875487e-05,0.00319611693550834,"USP36/WDR75/WDR43/BUD23/RIOK1/UTP15",6
GO:0006271,"GO:0006271","DNA strand elongation involved in DNA replication","7/649","20/11852",5.91827392884516e-05,5.91827392884516e-05,0.00343863986009297,"LIG3/POLD3/MCM4/MCM3/GINS2/MCM7/FEN1",7
GO:0090305,"GO:0090305","nucleic acid phosphodiester bond hydrolysis","30/649","255/11852",6.16451116742976e-05,6.16451116742976e-05,0.00352825046079287,"ELAC2/POLD3/NOP14/APEX1/POP1/KPNB1/RCL1/UTP20/CNOT1/ZFP36/NOB1/ISG20L2/REXO4/NOCT/RRS1/EXOSC7/EXOSC5/RPA2/EXOSC2/TOE1/ABT1/POLR3K/FEN1/SETMAR/RPS21/EXOSC4/AEN/UBA52/BOP1/DBR1",30
GO:0001510,"GO:0001510","RNA methylation","14/649","77/11852",6.42421176429821e-05,6.42421176429821e-05,0.003622817872653,"NSUN2/METTL1/TRMT6/FBL/FTSJ3/NOP2/TGS1/WDR4/METTL3/TRMT61A/BUD23/TRMT1/MRM2/EMG1",14
GO:0072655,"GO:0072655","establishment of protein localization to mitochondrion","19/649","128/11852",6.56184383949227e-05,6.56184383949227e-05,0.00364196886063969,"USP36/TIMM21/DNAJA1/HUWE1/PPP1R13B/E2F1/TIMM50/GRPEL1/TOMM40/HK2/DDIT3/TFDP1/TIMM23/TIMM13/TSPO/TIMM44/FBXW7/CHCHD4/PMPCA",19
GO:0009124,"GO:0009124","nucleoside monophosphate biosynthetic process","21/649","150/11852",6.64811773902111e-05,6.64811773902111e-05,0.00364196886063969,"AK2/NUP160/PKM/TIGAR/CAD/NUP50/DHODH/OGDH/NUP98/UMPS/NUP153/UCK2/ALDOA/GART/HK2/IMPDH2/ZBTB7A/PRPS1/UQCC3/TMSB4X/EIF6",21
GO:0050657,"GO:0050657","nucleic acid transport","23/649","173/11852",6.9075429725897e-05,6.9075429725897e-05,0.00367897354519653,"NUP160/KHSRP/NUP50/SUPT6H/NUP98/SRSF7/SRSF4/SMG7/XPO5/NUP153/SYMPK/ZFP36/NXF1/NOL6/RRS1/RNPS1/CETN3/EIF5A/NXT1/EIF4A3/ZNF593/SRSF2/EIF6",23
GO:0050658,"GO:0050658","RNA transport","23/649","173/11852",6.9075429725897e-05,6.9075429725897e-05,0.00367897354519653,"NUP160/KHSRP/NUP50/SUPT6H/NUP98/SRSF7/SRSF4/SMG7/XPO5/NUP153/SYMPK/ZFP36/NXF1/NOL6/RRS1/RNPS1/CETN3/EIF5A/NXT1/EIF4A3/ZNF593/SRSF2/EIF6",23
GO:0070585,"GO:0070585","protein localization to mitochondrion","19/649","130/11852",8.13327364088925e-05,8.13327364088925e-05,0.00423632967887551,"USP36/TIMM21/DNAJA1/HUWE1/PPP1R13B/E2F1/TIMM50/GRPEL1/TOMM40/HK2/DDIT3/TFDP1/TIMM23/TIMM13/TSPO/TIMM44/FBXW7/CHCHD4/PMPCA",19
GO:0000154,"GO:0000154","rRNA modification","9/649","35/11852",8.17496504048719e-05,8.17496504048719e-05,0.00423632967887551,"FBL/FTSJ3/NOP2/DKC1/NAT10/BUD23/MRM2/EMG1/NOP10",9
GO:0051236,"GO:0051236","establishment of RNA localization","23/649","176/11852",9.02937549691071e-05,9.02937549691071e-05,0.0046167038505608,"NUP160/KHSRP/NUP50/SUPT6H/NUP98/SRSF7/SRSF4/SMG7/XPO5/NUP153/SYMPK/ZFP36/NXF1/NOL6/RRS1/RNPS1/CETN3/EIF5A/NXT1/EIF4A3/ZNF593/SRSF2/EIF6",23
GO:0043144,"GO:0043144","snoRNA processing","5/649","10/11852",9.70347756485329e-05,9.70347756485329e-05,0.00489608985716905,"FBL/DKC1/EXOSC5/EXOSC2/EXOSC4",5
GO:0008033,"GO:0008033","tRNA processing","18/649","122/11852",0.000109866135574905,0.000109866135574905,0.00540138099729257,"ELAC2/NSUN2/METTL1/TRMT6/POP1/NAT10/WDR4/RPUSD4/TRMT61A/PUS1/TRMU/TRMT1/PUS3/QTRT2/POLR3K/ELP5/CTU2/TYW1B",18
GO:0009201,"GO:0009201","ribonucleoside triphosphate biosynthetic process","18/649","122/11852",0.000109866135574905,0.000109866135574905,0.00540138099729257,"NUP160/PKM/TIGAR/CAD/NUP50/OGDH/NUP98/NUP153/UCK2/ALDOA/HK2/CTPS1/IMPDH2/ZBTB7A/NME1/UQCC3/TMSB4X/EIF6",18
GO:1903312,"GO:1903312","negative regulation of mRNA metabolic process","12/649","62/11852",0.000113585425666266,0.000113585425666266,0.00551354704466631,"PTBP1/THRAP3/YBX1/E2F1/C1QBP/SRSF7/SRSF4/ZFP36/RBM38/SYNCRIP/NOCT/RNPS1",12
GO:0097193,"GO:0097193","intrinsic apoptotic signaling pathway","28/649","240/11852",0.000124328275029143,0.000124328275029143,0.00595957770962062,"PLAUR/CUL1/DNAJA1/PPP1R15A/PPP1R13B/XBP1/E2F1/PPIF/DDX5/MSH6/TNFRSF10B/TRAF2/ATF4/BCL2L2/MYBBP1A/CCAR2/DDIT3/ERCC6/RRN3/FBXW7/TRAP1/CHAC1/RPS3/RPS7/ZNF622/AEN/PTTG1IP/RACK1",28
GO:0000381,"GO:0000381","regulation of alternative mRNA splicing, via spliceosome","11/649","54/11852",0.000134806048424325,0.000134806048424325,0.0063195243557526,"PTBP1/THRAP3/SART3/DDX5/SRSF7/SRSF4/RBM25/RBM19/ZBTB7A/RNPS1/SRSF2",11
GO:0006399,"GO:0006399","tRNA metabolic process","22/649","169/11852",0.000135133392070581,0.000135133392070581,0.0063195243557526,"ELAC2/NSUN2/METTL1/TRMT6/POP1/NAT10/WDR4/RPUSD4/TRMT61A/PUS1/GATC/EXOSC7/TRMU/TRMT1/PUS3/EXOSC2/YARS2/QTRT2/POLR3K/ELP5/CTU2/TYW1B",22
GO:0051169,"GO:0051169","nuclear transport","33/649","305/11852",0.000139642065872502,0.000139642065872502,0.00645169367119243,"NUP160/GEMIN5/NUP50/KPNB1/SUPT6H/ZPR1/NUP98/HSPA9/SRSF7/SRSF4/SMG7/XPO5/NUP153/MED1/SYMPK/HMGA1/NXF1/NOL6/NOLC1/RRS1/FLNA/RNPS1/HYAL2/RPL23/SNRPB/EIF5A/NXT1/EIF4A3/ZNF593/SRSF2/SNRPD1/PTTG1IP/EIF6",33
GO:0042455,"GO:0042455","ribonucleoside biosynthetic process","8/649","30/11852",0.000154582659801619,0.000154582659801619,0.00705695024633206,"CAD/DHODH/UMPS/UCK2/CTPS1/IMPDH2/NME1/GUK1",8
GO:0034728,"GO:0034728","nucleosome organization","15/649","94/11852",0.00016679097332965,0.00016679097332965,0.00752469988656242,"PSME4/MCM2/SART3/SUPT16H/GRWD1/SUPT6H/NASP/HMGA1/CENPO/CHAF1A/RUVBL1/PTMA/BRD2/SMARCD2/POLE3",15
GO:0000727,"GO:0000727","double-strand break repair via break-induced replication","5/649","11/11852",0.00016989119778019,0.00016989119778019,0.00757544227066378,"MCM2/MCM4/MCM3/GINS2/MCM7",5
GO:0043487,"GO:0043487","regulation of RNA stability","21/649","161/11852",0.000185311306463423,0.000185311306463423,0.00816804705924076,"SAMD4A/THRAP3/YBX1/PSME4/KHSRP/APEX1/E2F1/ZFP36/DKC1/RBM38/SYNCRIP/NOCT/METTL3/HNRNPR/EXOSC7/EXOSC5/EXOSC2/TBRG4/PSMA5/EXOSC4/UBA52",21
GO:0007005,"GO:0007005","mitochondrion organization","44/649","458/11852",0.000190107897497338,0.000190107897497338,0.00828424725577514,"LIG3/PLAUR/USP36/TIMM21/TIGAR/HUWE1/PPP1R13B/MIEF1/E2F1/DHODH/DNAJA3/TIMM50/TWNK/PPIF/GRPEL1/TOMM40/CLUH/PPRC1/SUPV3L1/CCAR2/HK2/LETM1/JUN/TFDP1/INF2/TIMM23/AFG1L/UQCRB/TIMM13/TSPO/TIMM44/FBXW7/NDUFAF4/WDR45B/NDUFB11/NDUFB9/ATAD3B/CHCHD4/PMPCA/ESRRA/LONP1/ATAD3A…
GO:0046132,"GO:0046132","pyrimidine ribonucleoside biosynthetic process","6/649","17/11852",0.000193782457347959,0.000193782457347959,0.0083494913319765,"CAD/DHODH/UMPS/UCK2/CTPS1/NME1",6
GO:0017148,"GO:0017148","negative regulation of translation","18/649","128/11852",0.000204672200985707,0.000204672200985707,0.00872071144082958,"SAMD4A/KHSRP/NCL/CNOT1/ZFP36/ATF4/ILF3/EIF2S1/SYNCRIP/METTL3/EIF4EBP1/NANOS1/HNRNPR/EIF4A3/RPL13A/RPS3/RACK1/EIF6",18
GO:0061013,"GO:0061013","regulation of mRNA catabolic process","22/649","175/11852",0.000224973959563945,0.000224973959563945,0.00942044083317003,"SAMD4A/THRAP3/YBX1/PSME4/KHSRP/APEX1/E2F1/CNOT1/ZFP36/RBM38/SYNCRIP/NOCT/METTL3/NANOS1/HNRNPR/EXOSC7/EXOSC5/EXOSC2/TBRG4/PSMA5/EXOSC4/UBA52",22
GO:0031123,"GO:0031123","RNA 3'-end processing","18/649","129/11852",0.000226007831133423,0.000226007831133423,0.00942044083317003,"ELAC2/FBL/SRSF7/SRSF4/SYMPK/DKC1/INTS7/SUPV3L1/RNPS1/EXOSC7/EXOSC5/EXOSC2/TOE1/EIF4A3/SRSF2/POLR3K/RPS21/EXOSC4",18
GO:0002183,"GO:0002183","cytoplasmic translational initiation","8/649","32/11852",0.000252068640521901,0.000252068640521901,0.0103937301349325,"EIF3D/EIF3B/EIF3A/METTL3/EIF4EBP1/EIF4H/RPL13A/EIF4A2",8
GO:0006913,"GO:0006913","nucleocytoplasmic transport","32/649","302/11852",0.000257119676655038,0.000257119676655038,0.0104892159244603,"NUP160/GEMIN5/NUP50/KPNB1/SUPT6H/ZPR1/NUP98/HSPA9/SRSF7/SRSF4/SMG7/XPO5/NUP153/MED1/SYMPK/NXF1/NOL6/NOLC1/RRS1/FLNA/RNPS1/HYAL2/RPL23/SNRPB/EIF5A/NXT1/EIF4A3/ZNF593/SRSF2/SNRPD1/PTTG1IP/EIF6",32
GO:0009220,"GO:0009220","pyrimidine ribonucleotide biosynthetic process","6/649","18/11852",0.000277297476531557,0.000277297476531557,0.0110766963487332,"CAD/DHODH/UMPS/UCK2/CTPS1/NME1",6
GO:0030150,"GO:0030150","protein import into mitochondrial matrix","6/649","18/11852",0.000277297476531557,0.000277297476531557,0.0110766963487332,"TIMM21/TIMM50/GRPEL1/TOMM40/TIMM23/TIMM44",6
GO:0006284,"GO:0006284","base-excision repair","9/649","41/11852",0.000302072825999899,0.000302072825999899,0.0119419566480481,"LIG3/UNG/HUWE1/APEX1/HMGA1/ERCC6/RPA2/RPS3/FEN1",9
GO:0071103,"GO:0071103","DNA conformation change","26/649","228/11852",0.000308698059853565,0.000308698059853565,0.0120793451347641,"PSME4/MCM2/SART3/RAD54L/ACIN1/MCM4/AKAP8/GRWD1/TWNK/MCM3/GINS2/NASP/HMGA1/CENPO/CDCA5/SUPV3L1/MCM7/CHAF1A/CHD7/RUVBL1/TOP1MT/BRD2/ERCC6/ACTR5/POLE3/UBA52",26
GO:0009112,"GO:0009112","nucleobase metabolic process","8/649","33/11852",0.000316962683070458,0.000316962683070458,0.0121712937582738,"CAD/MTHFD1/DHODH/UMPS/MTHFD1L/GART/CTPS1/PRPS1",8
GO:0072331,"GO:0072331","signal transduction by p53 class mediator","27/649","241/11852",0.000317395802096078,0.000317395802096078,0.0121712937582738,"PPP1R13B/SUPT16H/PRMT5/E2F1/USP10/DDX5/NOP2/PAK1IP1/CNOT1/MYBBP1A/PLK2/ANKRD1/SSRP1/BRD7/RRS1/TFDP1/E2F4/MBD3/RRN3/RPA2/RPL23/PRMT1/RPS7/BANP/AEN/PTTG1IP/BOP1",27
GO:0043488,"GO:0043488","regulation of mRNA stability","20/649","156/11852",0.000329848094908448,0.000329848094908448,0.0124806295536724,"SAMD4A/THRAP3/YBX1/PSME4/KHSRP/APEX1/E2F1/ZFP36/RBM38/SYNCRIP/NOCT/METTL3/HNRNPR/EXOSC7/EXOSC5/EXOSC2/TBRG4/PSMA5/EXOSC4/UBA52",20
GO:0009142,"GO:0009142","nucleoside triphosphate biosynthetic process","18/649","133/11852",0.000331971727628562,0.000331971727628562,0.0124806295536724,"NUP160/PKM/TIGAR/CAD/NUP50/OGDH/NUP98/NUP153/UCK2/ALDOA/HK2/CTPS1/IMPDH2/ZBTB7A/NME1/UQCC3/TMSB4X/EIF6",18
GO:0071824,"GO:0071824","protein-DNA complex subunit organization","23/649","193/11852",0.000359717532006303,0.000359717532006303,0.0133924473081141,"PSME4/MCM2/SART3/SUPT16H/MCM4/GRWD1/SUPT6H/MCM3/NASP/POLR1E/HMGA1/CENPO/MCM7/CHAF1A/RUVBL1/PTMA/BRD2/RRN3/SMARCD2/RPA2/RPL23/POLE3/UBA52",23
GO:0006611,"GO:0006611","protein export from nucleus","21/649","169/11852",0.000363843923912358,0.000363843923912358,0.013415824036566,"NUP160/NUP50/SUPT6H/NUP98/HSPA9/SRSF7/SRSF4/SMG7/XPO5/NUP153/SYMPK/NXF1/NOL6/RRS1/RNPS1/EIF5A/NXT1/EIF4A3/ZNF593/SRSF2/EIF6",21
GO:0006261,"GO:0006261","DNA-dependent DNA replication","19/649","146/11852",0.000380920023936751,0.000380920023936751,0.0138570390797749,"LIG3/MCM2/POLD3/ORC1/DNAJA3/MCM4/TWNK/ZPR1/MCM3/MSH6/GINS2/HMGA1/MCM7/FBXW7/RPA2/POLE3/FEN1/SETMAR/MCMBP",19
GO:0016556,"GO:0016556","mRNA modification","6/649","19/11852",0.000386650568888038,0.000386650568888038,0.0138570390797749,"TRMT6/DKC1/METTL3/TRMT61A/PUS1/PUS3",6
GO:0034472,"GO:0034472","snRNA 3'-end processing","6/649","19/11852",0.000386650568888038,0.000386650568888038,0.0138570390797749,"INTS7/EXOSC7/EXOSC5/EXOSC2/TOE1/EXOSC4",6
GO:0043489,"GO:0043489","RNA stabilization","8/649","34/11852",0.000394861129024678,0.000394861129024678,0.0140202640646872,"THRAP3/YBX1/E2F1/ZFP36/DKC1/RBM38/SYNCRIP/NOCT",8
GO:0034404,"GO:0034404","nucleobase-containing small molecule biosynthetic process","22/649","183/11852",0.000424373067235998,0.000424373067235998,0.0147980484075259,"NUP160/PKM/UNG/TIGAR/CAD/NUP50/DHODH/OGDH/NUP98/UMPS/NUP153/UCK2/ALDOA/HK2/CTPS1/IMPDH2/ZBTB7A/PNP/NME1/GUK1/DCTPP1/EIF6",22
GO:0140053,"GO:0140053","mitochondrial gene expression","20/649","159/11852",0.000424484232387169,0.000424484232387169,0.0147980484075259,"ELAC2/MRPL32/TWNK/C1QBP/MRPS26/MRRF/SUPV3L1/MRPL17/RPUSD4/PUS1/GATC/MRPL27/MRPS12/MRPS25/MRPS9/TBRG4/YARS2/MRPL14/MRPL20/MRPS21",20
GO:0009161,"GO:0009161","ribonucleoside monophosphate metabolic process","29/649","272/11852",0.000445546224836568,0.000445546224836568,0.0153923650742496,"AK2/NUP160/PKM/TIGAR/CAD/NUP50/DHODH/OGDH/PPIF/NUP98/UMPS/NUP153/UCK2/ALDOA/GART/HK2/IMPDH2/ZBTB7A/AFG1L/UQCRB/TSPO/GUK1/NDUFB11/PRPS1/ATP6V1B2/NDUFB9/UQCC3/TMSB4X/EIF6",29
GO:0043484,"GO:0043484","regulation of RNA splicing","16/649","114/11852",0.000464330685585634,0.000464330685585634,0.0158980891690645,"PTBP1/THRAP3/SART3/C1QBP/DDX5/ZPR1/NUP98/SRSF7/SRSF4/RBM25/RBM19/AHNAK/RBM38/ZBTB7A/RNPS1/SRSF2",16
GO:0006400,"GO:0006400","tRNA modification","13/649","82/11852",0.000477344119467942,0.000477344119467942,0.0160194767665565,"NSUN2/METTL1/TRMT6/NAT10/WDR4/TRMT61A/PUS1/TRMU/TRMT1/PUS3/QTRT2/ELP5/CTU2",13
GO:0048024,"GO:0048024","regulation of mRNA splicing, via spliceosome","13/649","82/11852",0.000477344119467942,0.000477344119467942,0.0160194767665565,"PTBP1/THRAP3/SART3/C1QBP/DDX5/NUP98/SRSF7/SRSF4/RBM25/RBM19/ZBTB7A/RNPS1/SRSF2",13
GO:0046390,"GO:0046390","ribose phosphate biosynthetic process","25/649","222/11852",0.000483716158668076,0.000483716158668076,0.0160194767665565,"AK2/NUP160/PKM/TIGAR/CAD/NUP50/DHODH/OGDH/NUP98/UMPS/NUP153/UCK2/ALDOA/GART/HK2/CTPS1/IMPDH2/ZBTB7A/NME1/ACLY/GUK1/PRPS1/UQCC3/TMSB4X/EIF6",25
GO:0022616,"GO:0022616","DNA strand elongation","7/649","27/11852",0.000484585874190098,0.000484585874190098,0.0160194767665565,"LIG3/POLD3/MCM4/MCM3/GINS2/MCM7/FEN1",7
GO:0006406,"GO:0006406","mRNA export from nucleus","15/649","104/11852",0.00051575930751997,0.00051575930751997,0.0167015125419844,"NUP160/NUP50/SUPT6H/NUP98/SRSF7/SRSF4/SMG7/NUP153/SYMPK/NXF1/RNPS1/EIF5A/NXT1/EIF4A3/SRSF2",15
GO:0071427,"GO:0071427","mRNA-containing ribonucleoprotein complex export from nucleus","15/649","104/11852",0.00051575930751997,0.00051575930751997,0.0167015125419844,"NUP160/NUP50/SUPT6H/NUP98/SRSF7/SRSF4/SMG7/NUP153/SYMPK/NXF1/RNPS1/EIF5A/NXT1/EIF4A3/SRSF2",15
GO:0051028,"GO:0051028","mRNA transport","18/649","138/11852",0.000523086984573428,0.000523086984573428,0.0167015125419844,"NUP160/KHSRP/NUP50/SUPT6H/NUP98/SRSF7/SRSF4/SMG7/NUP153/SYMPK/ZFP36/NXF1/RNPS1/CETN3/EIF5A/NXT1/EIF4A3/SRSF2",18
GO:0009218,"GO:0009218","pyrimidine ribonucleotide metabolic process","6/649","20/11852",0.000526993924430719,0.000526993924430719,0.0167015125419844,"CAD/DHODH/UMPS/UCK2/CTPS1/NME1",6
GO:0009299,"GO:0009299","mRNA transcription","6/649","20/11852",0.000526993924430719,0.000526993924430719,0.0167015125419844,"DDX5/SUPT6H/MED1/ATF4/DDIT3/FLNA",6
GO:0009408,"GO:0009408","response to heat","18/649","139/11852",0.000571015062106448,0.000571015062106448,0.0179482991480051,"NUP160/HSPA5/DNAJA1/NUP50/DNAJA3/DNAJC2/NUP98/HSPA9/NUP153/EIF2S1/THBS1/MYOF/CCAR2/DNAJC7/DNAJA2/RPA2/IER5/IGFBP7",18
GO:0006414,"GO:0006414","translational elongation","17/649","128/11852",0.00060046164378922,0.00060046164378922,0.0187204259163383,"MRPL32/MRPS26/MRPL17/EEF1D/MRPL27/EEF1B2/MRPS12/MRPS25/EIF5A/DPH2/MRPS9/EIF4A3/DPH7/MRPL14/RACK1/MRPL20/MRPS21",17
GO:0006268,"GO:0006268","DNA unwinding involved in DNA replication","5/649","14/11852",0.000641456501449426,0.000641456501449426,0.0196785350297285,"MCM2/MCM4/TWNK/HMGA1/MCM7",5
GO:0042789,"GO:0042789","mRNA transcription by RNA polymerase II","5/649","14/11852",0.000641456501449426,0.000641456501449426,0.0196785350297285,"SUPT6H/MED1/ATF4/DDIT3/FLNA",5
GO:0009163,"GO:0009163","nucleoside biosynthetic process","8/649","37/11852",0.000726076039888948,0.000726076039888948,0.0220161750665143,"CAD/DHODH/UMPS/UCK2/CTPS1/IMPDH2/NME1/GUK1",8
GO:0000380,"GO:0000380","alternative mRNA splicing, via spliceosome","11/649","65/11852",0.000729138490742507,0.000729138490742507,0.0220161750665143,"PTBP1/THRAP3/SART3/DDX5/SRSF7/SRSF4/RBM25/RBM19/ZBTB7A/RNPS1/SRSF2",11
GO:0050684,"GO:0050684","regulation of mRNA processing","16/649","119/11852",0.00075165208357583,0.00075165208357583,0.0224398187373874,"PTBP1/THRAP3/SART3/C1QBP/DDX5/SUPT6H/NUP98/SRSF7/SRSF4/RBM25/RBM19/SAFB2/SAFB/ZBTB7A/RNPS1/SRSF2",16
GO:0009260,"GO:0009260","ribonucleotide biosynthetic process","24/649","216/11852",0.000754872299277195,0.000754872299277195,0.0224398187373874,"AK2/NUP160/PKM/TIGAR/CAD/NUP50/DHODH/OGDH/NUP98/UMPS/NUP153/UCK2/ALDOA/GART/HK2/CTPS1/IMPDH2/ZBTB7A/NME1/ACLY/GUK1/UQCC3/TMSB4X/EIF6",24
GO:0071025,"GO:0071025","RNA surveillance","5/649","15/11852",0.00091912278753281,0.00091912278753281,0.0271122616597735,"SUPV3L1/EXOSC7/EXOSC5/EXOSC2/EXOSC4",5
GO:0009303,"GO:0009303","rRNA transcription","7/649","30/11852",0.000962612256584644,0.000962612256584644,0.0279648839771759,"NCL/POLR1B/IPPK/NOL11/POLR1E/NPM3/CAVIN1",7
GO:0048255,"GO:0048255","mRNA stabilization","7/649","30/11852",0.000962612256584644,0.000962612256584644,0.0279648839771759,"THRAP3/YBX1/E2F1/ZFP36/RBM38/SYNCRIP/NOCT",7
GO:0017038,"GO:0017038","protein import","20/649","170/11852",0.00100185084272284,0.00100185084272284,0.0288859724577707,"TIMM21/NUP50/TIMM50/KPNB1/GRPEL1/ZPR1/NUP98/NUP153/MED1/TOMM40/NOLC1/FLNA/TIMM23/HYAL2/TIMM13/TIMM44/RPL23/NXT1/CHCHD4/PTTG1IP",20
GO:0034249,"GO:0034249","negative regulation of cellular amide metabolic process","18/649","146/11852",0.00102510705088932,0.00102510705088932,0.0291621052965623,"SAMD4A/KHSRP/NCL/CNOT1/ZFP36/ATF4/ILF3/EIF2S1/SYNCRIP/METTL3/EIF4EBP1/NANOS1/HNRNPR/EIF4A3/RPL13A/RPS3/RACK1/EIF6",18
GO:0045815,"GO:0045815","positive regulation of gene expression, epigenetic","9/649","48/11852",0.00102663738794513,0.00102663738794513,0.0291621052965623,"BAZ1B/POLR1A/POLR1B/MYBBP1A/POLR1E/HMGA1/DDX21/ERCC6/POLR1C",9
GO:0044743,"GO:0044743","protein transmembrane import into intracellular organelle","8/649","39/11852",0.00105038857794609,0.00105038857794609,0.029617380723356,"TIMM21/TIMM50/GRPEL1/TOMM40/TIMM23/TIMM13/TIMM44/CHCHD4",8
GO:0044786,"GO:0044786","cell cycle DNA replication","11/649","68/11852",0.0010761820256651,0.0010761820256651,0.0301231741797768,"MCM2/POLD3/MCM4/ZPR1/MCM3/MSH6/MCM7/FBXW7/RPA2/POLE3/FEN1",11
GO:0009199,"GO:0009199","ribonucleoside triphosphate metabolic process","27/649","261/11852",0.00109583108604898,0.00109583108604898,0.030450897379683,"AK2/NUP160/PKM/TIGAR/CAD/NUP50/OGDH/PPIF/NUP98/NUP153/UCK2/ALDOA/HK2/CTPS1/IMPDH2/ZBTB7A/NME1/AFG1L/UQCRB/TSPO/GUK1/NDUFB11/ATP6V1B2/NDUFB9/UQCC3/TMSB4X/EIF6",27
GO:0051168,"GO:0051168","nuclear export","21/649","184/11852",0.00112223198708459,0.00112223198708459,0.0309601751529661,"NUP160/NUP50/SUPT6H/NUP98/HSPA9/SRSF7/SRSF4/SMG7/XPO5/NUP153/SYMPK/NXF1/NOL6/RRS1/RNPS1/EIF5A/NXT1/EIF4A3/ZNF593/SRSF2/EIF6",21
GO:0006626,"GO:0006626","protein targeting to mitochondrion","13/649","91/11852",0.00130637582410966,0.00130637582410966,0.0356659736122866,"USP36/TIMM21/HUWE1/TIMM50/GRPEL1/TOMM40/TIMM23/TIMM13/TSPO/TIMM44/FBXW7/CHCHD4/PMPCA",13
GO:0009123,"GO:0009123","nucleoside monophosphate metabolic process","29/649","291/11852",0.001311407401967,0.001311407401967,0.0356659736122866,"AK2/NUP160/PKM/TIGAR/CAD/NUP50/DHODH/OGDH/PPIF/NUP98/UMPS/NUP153/UCK2/ALDOA/GART/HK2/IMPDH2/ZBTB7A/AFG1L/UQCRB/TSPO/GUK1/NDUFB11/PRPS1/ATP6V1B2/NDUFB9/UQCC3/TMSB4X/EIF6",29
GO:0006383,"GO:0006383","transcription by RNA polymerase III","9/649","50/11852",0.00139110166088177,0.00139110166088177,0.0375669633105433,"POLR3B/POLR3E/ELL/CRCP/POLR3K/NAB2/POLR3D/POLR1C/CEBPA",9
GO:0044843,"GO:0044843","cell cycle G1/S phase transition","25/649","239/11852",0.00141301132351347,0.00141301132351347,0.037681702620966,"CUL1/MCM2/ORC1/APEX1/E2F1/MCM4/ZPR1/MCM3/CNOT1/NASP/RIPK1/PLK2/CDC25A/BRD7/MCM7/RCC1/EIF4EBP1/TFDP1/E2F4/FBXW7/RPA2/PRMT1/RPS6/POLE3/PLRG1",25
GO:0000082,"GO:0000082","G1/S transition of mitotic cell cycle","24/649","226/11852",0.00142088004078885,0.00142088004078885,0.037681702620966,"CUL1/MCM2/ORC1/APEX1/E2F1/MCM4/ZPR1/MCM3/CNOT1/NASP/RIPK1/PLK2/CDC25A/BRD7/MCM7/RCC1/EIF4EBP1/TFDP1/E2F4/RPA2/PRMT1/RPS6/POLE3/PLRG1",24
GO:0034427,"GO:0034427","nuclear-transcribed mRNA catabolic process, exonucleolytic, 3'-5'","4/649","10/11852",0.0014346560948471,0.0014346560948471,0.037681702620966,"EXOSC7/EXOSC5/EXOSC2/EXOSC4",4
GO:0075522,"GO:0075522","IRES-dependent viral translational initiation","4/649","10/11852",0.0014346560948471,0.0014346560948471,0.037681702620966,"PTBP1/EIF3D/EIF3B/EIF3A",4
GO:0001825,"GO:0001825","blastocyst formation","7/649","32/11852",0.0014468468070701,0.0014468468070701,0.0377433792922045,"NLE1/SUPT6H/BYSL/WDR74/RPL7L1/CCNB1IP1/RRP7A",7
GO:1901659,"GO:1901659","glycosyl compound biosynthetic process","8/649","41/11852",0.00148114385047607,0.00148114385047607,0.0383770060262043,"CAD/DHODH/UMPS/UCK2/CTPS1/IMPDH2/NME1/GUK1",8
GO:0009141,"GO:0009141","nucleoside triphosphate metabolic process","28/649","280/11852",0.00149796995259808,0.00149796995259808,0.0385285014788107,"AK2/NUP160/PKM/TIGAR/CAD/NUP50/OGDH/PPIF/NUP98/NUP153/UCK2/ALDOA/HK2/CTPS1/IMPDH2/ZBTB7A/NME1/AFG1L/UQCRB/TSPO/GUK1/NDUFB11/ATP6V1B2/NDUFB9/DCTPP1/UQCC3/TMSB4X/EIF6",28
GO:0046131,"GO:0046131","pyrimidine ribonucleoside metabolic process","6/649","24/11852",0.00151713245598007,0.00151713245598007,0.0385285014788107,"CAD/DHODH/UMPS/UCK2/CTPS1/NME1",6
GO:0046134,"GO:0046134","pyrimidine nucleoside biosynthetic process","6/649","24/11852",0.00151713245598007,0.00151713245598007,0.0385285014788107,"CAD/DHODH/UMPS/UCK2/CTPS1/NME1",6
GO:0006415,"GO:0006415","translational termination","14/649","104/11852",0.00155682242771166,0.00155682242771166,0.03927634421159,"JMJD4/MRPL32/ETF1/MRPS26/MRRF/MRPL17/MRPL27/MRPS12/MRPS25/EIF5A/MRPS9/MRPL14/MRPL20/MRPS21",14
GO:0009206,"GO:0009206","purine ribonucleoside triphosphate biosynthetic process","15/649","116/11852",0.00162315844549678,0.00162315844549678,0.0406822581145152,"NUP160/PKM/TIGAR/NUP50/OGDH/NUP98/NUP153/ALDOA/HK2/IMPDH2/ZBTB7A/NME1/UQCC3/TMSB4X/EIF6",15
GO:0009127,"GO:0009127","purine nucleoside monophosphate biosynthetic process","16/649","128/11852",0.00165315348102689,0.00165315348102689,0.0408994100603122,"AK2/NUP160/PKM/TIGAR/NUP50/OGDH/NUP98/NUP153/ALDOA/GART/HK2/IMPDH2/ZBTB7A/UQCC3/TMSB4X/EIF6",16
GO:0009168,"GO:0009168","purine ribonucleoside monophosphate biosynthetic process","16/649","128/11852",0.00165315348102689,0.00165315348102689,0.0408994100603122,"AK2/NUP160/PKM/TIGAR/NUP50/OGDH/NUP98/NUP153/ALDOA/GART/HK2/IMPDH2/ZBTB7A/UQCC3/TMSB4X/EIF6",16
GO:0001522,"GO:0001522","pseudouridine synthesis","5/649","17/11852",0.0017285654574068,0.0017285654574068,0.0420498402065952,"DKC1/RPUSD4/PUS1/PUS3/NOP10",5
GO:0032986,"GO:0032986","protein-DNA complex disassembly","5/649","17/11852",0.0017285654574068,0.0017285654574068,0.0420498402065952,"SUPT16H/GRWD1/HMGA1/SMARCD2/RPL23",5
GO:0090503,"GO:0090503","RNA phosphodiester bond hydrolysis, exonucleolytic","8/649","42/11852",0.00174351588339451,0.00174351588339451,0.0420498402065952,"CNOT1/ISG20L2/NOCT/EXOSC7/EXOSC5/EXOSC2/TOE1/EXOSC4",8
GO:1902369,"GO:1902369","negative regulation of RNA catabolic process","8/649","42/11852",0.00174351588339451,0.00174351588339451,0.0420498402065952,"THRAP3/YBX1/E2F1/ZFP36/DKC1/RBM38/SYNCRIP/NOCT",8
GO:0009145,"GO:0009145","purine nucleoside triphosphate biosynthetic process","15/649","117/11852",0.00177032607436664,0.00177032607436664,0.0424295913744585,"NUP160/PKM/TIGAR/NUP50/OGDH/NUP98/NUP153/ALDOA/HK2/IMPDH2/ZBTB7A/NME1/UQCC3/TMSB4X/EIF6",15
GO:0016180,"GO:0016180","snRNA processing","6/649","25/11852",0.0019050693651744,0.0019050693651744,0.0453754017478283,"INTS7/EXOSC7/EXOSC5/EXOSC2/TOE1/EXOSC4",6
GO:0007595,"GO:0007595","lactation","7/649","34/11852",0.00210264996222135,0.00210264996222135,0.0497722794826014,"CAD/XBP1/DHODH/UMPS/MED1/HK2/NME1",7
GO:0000387,"GO:0000387","spliceosomal snRNP assembly","9/649","53/11852",0.00212604870939648,0.00212604870939648,0.0500174068345585,"SART3/GEMIN5/PRMT5/PRPF3/TGS1/SART1/WDR77/SNRPB/SNRPD1",9
GO:0009113,"GO:0009113","purine nucleobase biosynthetic process","4/649","11/11852",0.00215737889317105,0.00215737889317105,0.0504450019757517,"MTHFD1/MTHFD1L/GART/PRPS1",4
GO:0048025,"GO:0048025","negative regulation of mRNA splicing, via spliceosome","5/649","18/11852",0.00228674545005112,0.00228674545005112,0.0531458607625916,"PTBP1/C1QBP/SRSF7/SRSF4/RNPS1",5
GO:0031167,"GO:0031167","rRNA methylation","6/649","26/11852",0.00236362673310682,0.00236362673310682,0.05460172599054,"FBL/FTSJ3/NOP2/BUD23/MRM2/EMG1",6
GO:0065002,"GO:0065002","intracellular protein transmembrane transport","9/649","54/11852",0.00243012365778907,0.00243012365778907,0.0556628948748283,"HSPA5/TIMM21/TIMM50/GRPEL1/TOMM40/TIMM23/TIMM13/TIMM44/CHCHD4",9
GO:0045727,"GO:0045727","positive regulation of translation","14/649","109/11852",0.00244234150668441,0.00244234150668441,0.0556628948748283,"SAMD4A/JMJD4/PPP1R15A/EIF3D/C1QBP/NAT10/THBS1/RPUSD4/METTL3/GUF1/EIF5A/EIF4A3/RPS9/EIF6",14
GO:0009266,"GO:0009266","response to temperature stimulus","20/649","183/11852",0.00245310946257307,0.00245310946257307,0.0556628948748283,"NUP160/HSPA5/DNAJA1/NUP50/DNAJA3/DNAJC2/NUP98/HSPA9/NUP153/EIF2S1/THBS1/MYOF/PLAC8/ADM/CCAR2/DNAJC7/DNAJA2/RPA2/IER5/IGFBP7",20
GO:0006220,"GO:0006220","pyrimidine nucleotide metabolic process","9/649","55/11852",0.00276771751453134,0.00276771751453134,0.0624321665971372,"UNG/CAD/DHODH/UMPS/UCK2/CTPS1/NME1/PRPS1/DCTPP1",9
GO:0009147,"GO:0009147","pyrimidine nucleoside triphosphate metabolic process","5/649","19/11852",0.00296535076475223,0.00296535076475223,0.0661540946485519,"CAD/UCK2/CTPS1/NME1/DCTPP1",5
GO:1902373,"GO:1902373","negative regulation of mRNA catabolic process","7/649","36/11852",0.00296721906823315,0.00296721906823315,0.0661540946485519,"THRAP3/YBX1/E2F1/ZFP36/RBM38/SYNCRIP/NOCT",7
GO:0043414,"GO:0043414","macromolecule methylation","25/649","253/11852",0.00307484396278749,0.00307484396278749,0.0674781162184749,"NSUN2/METTL1/TRMT6/PRMT5/FBL/FTSJ3/SUPT6H/NOP2/ETF1/TGS1/SETD7/WDR4/METTL3/TRMT61A/BUD23/MBD3/TRMT1/EEF2KMT/MRM2/SNRPB/PRMT1/EMG1/NTMT1/SETMAR/WDR5",25
GO:0009209,"GO:0009209","pyrimidine ribonucleoside triphosphate biosynthetic process","4/649","12/11852",0.0030969917737384,0.0030969917737384,0.0674781162184749,"CAD/UCK2/CTPS1/NME1",4
GO:0010042,"GO:0010042","response to manganese ion","4/649","12/11852",0.0030969917737384,0.0030969917737384,0.0674781162184749,"HSPA5/ATF4/EIF2S1/TSPO",4
GO:1903025,"GO:1903025","regulation of RNA polymerase II regulatory region sequence-specific DNA binding","4/649","12/11852",0.0030969917737384,0.0030969917737384,0.0674781162184749,"DDIT3/FBXW7/ZNF593/TMSB4X",4
GO:0072522,"GO:0072522","purine-containing compound biosynthetic process","23/649","227/11852",0.00323687128089182,0.00323687128089182,0.0701273986101035,"AK2/NUP160/PKM/TIGAR/NUP50/MTHFD1/OGDH/NUP98/MTHFD1L/NUP153/ALDOA/GART/HK2/IMPDH2/ZBTB7A/PNP/NME1/ACLY/GUK1/PRPS1/UQCC3/TMSB4X/EIF6",23
GO:1901796,"GO:1901796","regulation of signal transduction by p53 class mediator","18/649","162/11852",0.00330496901101593,0.00330496901101593,0.0712004855537022,"PPP1R13B/SUPT16H/PRMT5/DDX5/NOP2/PAK1IP1/ANKRD1/SSRP1/BRD7/RRS1/MBD3/RRN3/RPA2/RPL23/RPS7/BANP/PTTG1IP/BOP1",18
GO:0006997,"GO:0006997","nucleus organization","14/649","113/11852",0.00341870488862887,0.00341870488862887,0.0732392937916788,"USP36/PSME4/PES1/CHMP4B/ZPR1/NUP98/NUP153/POLR1B/NOLC1/NDEL1/SF1/RRN3/RPS19/EMG1",14
GO:0042769,"GO:0042769","DNA damage response, detection of DNA damage","7/649","37/11852",0.00349015244151348,0.00349015244151348,0.0742600522429396,"POLD3/DNAJA1/MRPS26/RPA2/MRPS9/RPS3/UBA52",7
GO:0009165,"GO:0009165","nucleotide biosynthetic process","27/649","283/11852",0.00350508261959195,0.00350508261959195,0.0742600522429396,"AK2/NUP160/PKM/TIGAR/CAD/NUP50/MTHFD1/DHODH/OGDH/NUP98/UMPS/NUP153/UCK2/ALDOA/GART/HK2/CTPS1/IMPDH2/ZBTB7A/PNP/NME1/ACLY/GUK1/PRPS1/UQCC3/TMSB4X/EIF6",27
GO:0032392,"GO:0032392","DNA geometric change","14/649","114/11852",0.00370701323521285,0.00370701323521285,0.0781067045452886,"MCM2/RAD54L/MCM4/TWNK/MCM3/GINS2/HMGA1/SUPV3L1/MCM7/CHD7/RUVBL1/ERCC6/ACTR5/UBA52",14
GO:0006333,"GO:0006333","chromatin assembly or disassembly","13/649","103/11852",0.00400558092985344,0.00400558092985344,0.0832205513372969,"BAZ1B/MCM2/SART3/SUPT16H/GRWD1/NASP/HMGA1/CENPO/CHAF1A/RUVBL1/BRD2/SMARCD2/POLE3",13
GO:0006323,"GO:0006323","DNA packaging","14/649","115/11852",0.00401482621398022,0.00401482621398022,0.0832205513372969,"PSME4/MCM2/SART3/ACIN1/AKAP8/GRWD1/NASP/HMGA1/CENPO/CDCA5/CHAF1A/RUVBL1/BRD2/POLE3",14
GO:0034605,"GO:0034605","cellular response to heat","14/649","115/11852",0.00401482621398022,0.00401482621398022,0.0832205513372969,"NUP160/HSPA5/NUP50/DNAJC2/NUP98/HSPA9/NUP153/EIF2S1/THBS1/MYOF/CCAR2/DNAJC7/RPA2/IER5",14
GO:0001824,"GO:0001824","blastocyst development","11/649","80/11852",0.00406505283352535,0.00406505283352535,0.0838086444399143,"NLE1/SUPT6H/ZPR1/BYSL/NASP/WDR74/RPL7L1/NDEL1/CCNB1IP1/EMG1/RRP7A",11
GO:1901293,"GO:1901293","nucleoside phosphate biosynthetic process","27/649","287/11852",0.00424498422852212,0.00424498422852212,0.0864139790751983,"AK2/NUP160/PKM/TIGAR/CAD/NUP50/MTHFD1/DHODH/OGDH/NUP98/UMPS/NUP153/UCK2/ALDOA/GART/HK2/CTPS1/IMPDH2/ZBTB7A/PNP/NME1/ACLY/GUK1/PRPS1/UQCC3/TMSB4X/EIF6",27
GO:0009208,"GO:0009208","pyrimidine ribonucleoside triphosphate metabolic process","4/649","13/11852",0.00428156003927348,0.00428156003927348,0.0864139790751983,"CAD/UCK2/CTPS1/NME1",4
GO:0071027,"GO:0071027","nuclear RNA surveillance","4/649","13/11852",0.00428156003927348,0.00428156003927348,0.0864139790751983,"EXOSC7/EXOSC5/EXOSC2/EXOSC4",4
GO:0071028,"GO:0071028","nuclear mRNA surveillance","4/649","13/11852",0.00428156003927348,0.00428156003927348,0.0864139790751983,"EXOSC7/EXOSC5/EXOSC2/EXOSC4",4
GO:0072527,"GO:0072527","pyrimidine-containing compound metabolic process","11/649","81/11852",0.00447782144272176,0.00447782144272176,0.0899019207265659,"UNG/CAD/DHODH/UMPS/SLC25A19/UCK2/CTPS1/NME1/THTPA/PRPS1/DCTPP1",11
GO:0097190,"GO:0097190","apoptotic signaling pathway","40/649","477/11852",0.00467531759042466,0.00467531759042466,0.0927149339577902,"PLAUR/CUL1/NLE1/DNAJA1/PPP1R15A/PPP1R13B/XBP1/E2F1/TIMM50/PPIF/DDX5/MSH6/TNFRSF10B/TRAF2/ATF4/BCL2L2/MYBBP1A/RIPK1/THBS1/CCAR2/PEA15/KRT8/DDIT3/BDNF/JUN/TFDP1/ERCC6/TNFRSF12A/HYAL2/RRN3/FBXW7/KRT18/TRAP1/CHAC1/RPS3/RPS7/ZNF622/AEN/PTTG1IP/RACK1",40
GO:0006354,"GO:0006354","DNA-templated transcription, elongation","13/649","105/11852",0.0047294467384824,0.0047294467384824,0.0927149339577902,"POLR1A/CCNK/SUPT16H/ELL/SUPT6H/POLR1B/POLR1E/SSRP1/CCAR2/ERCC6/ELOC/ELOB/POLR1C",13
GO:0032508,"GO:0032508","DNA duplex unwinding","13/649","105/11852",0.0047294467384824,0.0047294467384824,0.0927149339577902,"MCM2/MCM4/TWNK/MCM3/GINS2/HMGA1/SUPV3L1/MCM7/CHD7/RUVBL1/ERCC6/ACTR5/UBA52",13
GO:0036499,"GO:0036499","PERK-mediated unfolded protein response","5/649","21/11852",0.00473881984708771,0.00473881984708771,0.0927149339577902,"HSPA5/PPP1R15A/ATF4/EIF2S1/DDIT3",5
GO:0060148,"GO:0060148","positive regulation of posttranscriptional gene silencing","5/649","21/11852",0.00473881984708771,0.00473881984708771,0.0927149339577902,"DDX5/XPO5/ZFP36/AJUBA/RIPK1",5
GO:0034250,"GO:0034250","positive regulation of cellular amide metabolic process","15/649","130/11852",0.00492955099651856,0.00492955099651856,0.0959570092456165,"SAMD4A/JMJD4/PPP1R15A/EIF3D/C1QBP/NAT10/THBS1/RPUSD4/METTL3/GUF1/EIF5A/EIF4A3/RPS9/RACK1/EIF6",15
GO:0032786,"GO:0032786","positive regulation of DNA-templated transcription, elongation","6/649","30/11852",0.00506035695877744,0.00506035695877744,0.0980057437577152,"CCNK/SUPT16H/ELL/SUPT6H/ERCC6/ELOC",6
GO:0006221,"GO:0006221","pyrimidine nucleotide biosynthetic process","7/649","40/11852",0.00548394708530589,0.00548394708530589,0.105675848885318,"CAD/DHODH/UMPS/UCK2/CTPS1/NME1/PRPS1",7
GO:0051101,"GO:0051101","regulation of DNA binding","12/649","95/11852",0.00554833997855716,0.00554833997855716,0.105978677261968,"PLAUR/E2F1/CDCA5/DDIT3/JUN/ZBTB7A/NME1/PINX1/EDF1/FBXW7/ZNF593/TMSB4X",12
GO:0046939,"GO:0046939","nucleotide phosphorylation","13/649","107/11852",0.00555493505988821,0.00555493505988821,0.105978677261968,"NUP160/PKM/TIGAR/NUP50/OGDH/NUP98/NUP153/ALDOA/HK2/ZBTB7A/NME1/GUK1/EIF6",13
GO:0071806,"GO:0071806","protein transmembrane transport","9/649","61/11852",0.00564303293367953,0.00564303293367953,0.106290781074958,"HSPA5/TIMM21/TIMM50/GRPEL1/TOMM40/TIMM23/TIMM13/TIMM44/CHCHD4",9
GO:0006206,"GO:0006206","pyrimidine nucleobase metabolic process","4/649","14/11852",0.0057376014544031,0.0057376014544031,0.106290781074958,"CAD/DHODH/UMPS/CTPS1",4
GO:0009130,"GO:0009130","pyrimidine nucleoside monophosphate biosynthetic process","4/649","14/11852",0.0057376014544031,0.0057376014544031,0.106290781074958,"CAD/DHODH/UMPS/UCK2",4
GO:0019081,"GO:0019081","viral translation","4/649","14/11852",0.0057376014544031,0.0057376014544031,0.106290781074958,"PTBP1/EIF3D/EIF3B/EIF3A",4
GO:0042790,"GO:0042790","nucleolar large rRNA transcription by RNA polymerase I","4/649","14/11852",0.0057376014544031,0.0057376014544031,0.106290781074958,"NCL/IPPK/NOL11/POLR1E",4
GO:1902570,"GO:1902570","protein localization to nucleolus","4/649","14/11852",0.0057376014544031,0.0057376014544031,0.106290781074958,"POLR1A/BYSL/RRS1/PINX1",4
GO:0006754,"GO:0006754","ATP biosynthetic process","13/649","108/11852",0.00600881234161982,0.00600881234161982,0.11077987530628,"NUP160/PKM/TIGAR/NUP50/OGDH/NUP98/NUP153/ALDOA/HK2/ZBTB7A/UQCC3/TMSB4X/EIF6",13
GO:0032543,"GO:0032543","mitochondrial translation","15/649","133/11852",0.00609031092974435,0.00609031092974435,0.111745166039077,"MRPL32/C1QBP/MRPS26/MRRF/MRPL17/RPUSD4/GATC/MRPL27/MRPS12/MRPS25/MRPS9/YARS2/MRPL14/MRPL20/MRPS21",15
GO:2001235,"GO:2001235","positive regulation of apoptotic signaling pathway","16/649","146/11852",0.00620378246431936,0.00620378246431936,0.113285110363486,"PLAUR/PPP1R13B/E2F1/PPIF/TRAF2/RIPK1/THBS1/PEA15/DDIT3/TFDP1/TNFRSF12A/HYAL2/FBXW7/RPS3/RPS7/RACK1",16
GO:0009205,"GO:0009205","purine ribonucleoside triphosphate metabolic process","24/649","255/11852",0.00675127966229343,0.00675127966229343,0.122698487451908,"AK2/NUP160/PKM/TIGAR/NUP50/OGDH/PPIF/NUP98/NUP153/ALDOA/HK2/IMPDH2/ZBTB7A/NME1/AFG1L/UQCRB/TSPO/GUK1/NDUFB11/ATP6V1B2/NDUFB9/UQCC3/TMSB4X/EIF6",24
GO:0009135,"GO:0009135","purine nucleoside diphosphate metabolic process","13/649","110/11852",0.00700508612480887,0.00700508612480887,0.125840170850411,"AK2/NUP160/PKM/TIGAR/NUP50/OGDH/NUP98/NUP153/ALDOA/HK2/ZBTB7A/GUK1/EIF6",13
GO:0009179,"GO:0009179","purine ribonucleoside diphosphate metabolic process","13/649","110/11852",0.00700508612480887,0.00700508612480887,0.125840170850411,"AK2/NUP160/PKM/TIGAR/NUP50/OGDH/NUP98/NUP153/ALDOA/HK2/ZBTB7A/GUK1/EIF6",13
GO:0033574,"GO:0033574","response to testosterone","6/649","32/11852",0.00703882027397582,0.00703882027397582,0.125840170850411,"CAD/NASP/THBS1/MSN/NME1/TSPO",6
GO:0007051,"GO:0007051","spindle organization","17/649","161/11852",0.00705540897507451,0.00705540897507451,0.125840170850411,"ZNF207/EZR/MYH9/CHMP4B/BCCIP/KPNB1/PLK2/RCC1/FLNA/GNAI1/WRAP73/AUNIP/HAUS2/NTMT1/RPS3/DRG1/HAUS7",17
GO:0033119,"GO:0033119","negative regulation of RNA splicing","5/649","23/11852",0.00715777929067602,0.00715777929067602,0.127074999785247,"PTBP1/C1QBP/SRSF7/SRSF4/RNPS1",5
GO:0006164,"GO:0006164","purine nucleotide biosynthetic process","21/649","215/11852",0.00723482364579729,0.00723482364579729,0.127850897606789,"AK2/NUP160/PKM/TIGAR/NUP50/MTHFD1/OGDH/NUP98/NUP153/ALDOA/GART/HK2/IMPDH2/ZBTB7A/NME1/ACLY/GUK1/PRPS1/UQCC3/TMSB4X/EIF6",21
GO:0046034,"GO:0046034","ATP metabolic process","22/649","229/11852",0.00733866545294126,0.00733866545294126,0.12879514846093,"AK2/NUP160/PKM/TIGAR/NUP50/OGDH/PPIF/NUP98/NUP153/ALDOA/HK2/ZBTB7A/AFG1L/UQCRB/TSPO/GUK1/NDUFB11/ATP6V1B2/NDUFB9/UQCC3/TMSB4X/EIF6",22
GO:0051170,"GO:0051170","import into nucleus","15/649","136/11852",0.00746170150739216,0.00746170150739216,0.12879514846093,"GEMIN5/NUP50/KPNB1/ZPR1/NUP98/NUP153/MED1/NOLC1/FLNA/HYAL2/RPL23/SNRPB/NXT1/SNRPD1/PTTG1IP",15
GO:0006337,"GO:0006337","nucleosome disassembly","4/649","15/11852",0.0074897755150832,0.0074897755150832,0.12879514846093,"SUPT16H/GRWD1/HMGA1/SMARCD2",4
GO:0009129,"GO:0009129","pyrimidine nucleoside monophosphate metabolic process","4/649","15/11852",0.0074897755150832,0.0074897755150832,0.12879514846093,"CAD/DHODH/UMPS/UCK2",4
GO:1904874,"GO:1904874","positive regulation of telomerase RNA localization to Cajal body","4/649","15/11852",0.0074897755150832,0.0074897755150832,0.12879514846093,"DKC1/RUVBL1/CCT6A/NOP10",4
GO:2000678,"GO:2000678","negative regulation of transcription regulatory region DNA binding","4/649","15/11852",0.0074897755150832,0.0074897755150832,0.12879514846093,"DDIT3/FBXW7/ZNF593/TMSB4X",4
GO:0046031,"GO:0046031","ADP metabolic process","12/649","99/11852",0.00770025711936155,0.00770025711936155,0.131823480666514,"AK2/NUP160/PKM/TIGAR/NUP50/OGDH/NUP98/NUP153/ALDOA/HK2/ZBTB7A/EIF6",12
GO:0006334,"GO:0006334","nucleosome assembly","9/649","64/11852",0.00775217346680509,0.00775217346680509,0.132122423109104,"MCM2/SART3/GRWD1/NASP/CENPO/CHAF1A/RUVBL1/BRD2/POLE3",9
GO:0009185,"GO:0009185","ribonucleoside diphosphate metabolic process","13/649","112/11852",0.00812796586785381,0.00812796586785381,0.137914204269173,"AK2/NUP160/PKM/TIGAR/NUP50/OGDH/NUP98/NUP153/ALDOA/HK2/ZBTB7A/GUK1/EIF6",13
GO:1990542,"GO:1990542","mitochondrial transmembrane transport","10/649","76/11852",0.0082172780200454,0.0082172780200454,0.138815413062951,"TIMM21/TIMM50/GRPEL1/TOMM40/SLC25A38/LETM1/TIMM23/TIMM13/TIMM44/CHCHD4",10
GO:0009126,"GO:0009126","purine nucleoside monophosphate metabolic process","24/649","260/11852",0.00851822079596121,0.00851822079596121,0.142642511421221,"AK2/NUP160/PKM/TIGAR/NUP50/OGDH/PPIF/NUP98/NUP153/ALDOA/GART/HK2/IMPDH2/ZBTB7A/AFG1L/UQCRB/TSPO/GUK1/NDUFB11/ATP6V1B2/NDUFB9/UQCC3/TMSB4X/EIF6",24
GO:0009167,"GO:0009167","purine ribonucleoside monophosphate metabolic process","24/649","260/11852",0.00851822079596121,0.00851822079596121,0.142642511421221,"AK2/NUP160/PKM/TIGAR/NUP50/OGDH/PPIF/NUP98/NUP153/ALDOA/GART/HK2/IMPDH2/ZBTB7A/AFG1L/UQCRB/TSPO/GUK1/NDUFB11/ATP6V1B2/NDUFB9/UQCC3/TMSB4X/EIF6",24
GO:0009132,"GO:0009132","nucleoside diphosphate metabolic process","14/649","126/11852",0.0089752677258104,0.0089752677258104,0.149355516028799,"AK2/NUP160/PKM/TIGAR/NUP50/OGDH/NUP98/NUP153/ALDOA/HK2/ZBTB7A/NME1/GUK1/EIF6",14
GO:0034101,"GO:0034101","erythrocyte homeostasis","12/649","101/11852",0.00899699917444964,0.00899699917444964,0.149355516028799,"ACIN1/HSPA9/MED1/ZFP36/RPS24/SLC25A38/LYAR/ZBTB7A/RPS19/PRMT1/RPS6/RPS14",12
GO:0006096,"GO:0006096","glycolytic process","11/649","89/11852",0.00910513496699638,0.00910513496699638,0.149853203906789,"NUP160/PKM/TIGAR/NUP50/OGDH/NUP98/NUP153/ALDOA/HK2/ZBTB7A/EIF6",11
GO:0070126,"GO:0070126","mitochondrial translational termination","11/649","89/11852",0.00910513496699638,0.00910513496699638,0.149853203906789,"MRPL32/MRPS26/MRRF/MRPL17/MRPL27/MRPS12/MRPS25/MRPS9/MRPL14/MRPL20/MRPS21",11
GO:0009144,"GO:0009144","purine nucleoside triphosphate metabolic process","24/649","262/11852",0.00932331414622032,0.00932331414622032,0.152709039560081,"AK2/NUP160/PKM/TIGAR/NUP50/OGDH/PPIF/NUP98/NUP153/ALDOA/HK2/IMPDH2/ZBTB7A/NME1/AFG1L/UQCRB/TSPO/GUK1/NDUFB11/ATP6V1B2/NDUFB9/UQCC3/TMSB4X/EIF6",24
GO:0001701,"GO:0001701","in utero embryonic development","27/649","305/11852",0.00939370205505289,0.00939370205505289,0.152709039560081,"NSUN2/EPN1/NLE1/MYH9/HM13/ELL/SUPT6H/ZPR1/BYSL/MED1/NASP/WDR74/TPM1/RPL7L1/ADM/NDEL1/KRT8/CHD7/FOSL1/XRCC2/MBD3/RRN3/CCNB1IP1/PRMT1/EMG1/RRP7A/CEBPA",27
GO:0006361,"GO:0006361","transcription initiation from RNA polymerase I promoter","6/649","34/11852",0.00952343067754249,0.00952343067754249,0.152709039560081,"POLR1A/POLR1B/POLR1E/RRN3/POLR1C/CAVIN1",6
GO:0000963,"GO:0000963","mitochondrial RNA processing","4/649","16/11852",0.00956064778921642,0.00956064778921642,0.152709039560081,"ELAC2/SUPV3L1/PUS1/TBRG4",4
GO:0006448,"GO:0006448","regulation of translational elongation","4/649","16/11852",0.00956064778921642,0.00956064778921642,0.152709039560081,"EIF5A/DPH2/EIF4A3/DPH7",4
GO:0006450,"GO:0006450","regulation of translational fidelity","4/649","16/11852",0.00956064778921642,0.00956064778921642,0.152709039560081,"YRDC/GATC/RPS5/RPS9",4
GO:0009148,"GO:0009148","pyrimidine nucleoside triphosphate biosynthetic process","4/649","16/11852",0.00956064778921642,0.00956064778921642,0.152709039560081,"CAD/UCK2/CTPS1/NME1",4
GO:0009411,"GO:0009411","response to UV","14/649","127/11852",0.00959723705936879,0.00959723705936879,0.152709039560081,"POLD3/MAP3K4/MSH6/ATF4/EIF2S1/SDE2/CCAR2/CDC25A/METTL3/E2F4/ERCC6/HYAL2/ACTR5/FEN1",14
GO:0006757,"GO:0006757","ATP generation from ADP","11/649","90/11852",0.00987702069290713,0.00987702069290713,0.156511467526145,"NUP160/PKM/TIGAR/NUP50/OGDH/NUP98/NUP153/ALDOA/HK2/ZBTB7A/EIF6",11
GO:0010762,"GO:0010762","regulation of fibroblast migration","5/649","25/11852",0.0103264327045172,0.0103264327045172,0.16162919158993,"ARHGEF7/CORO1C/THBS1/HYAL2/SDC4",5
GO:0034661,"GO:0034661","ncRNA catabolic process","5/649","25/11852",0.0103264327045172,0.0103264327045172,0.16162919158993,"POP1/EXOSC7/EXOSC5/EXOSC2/EXOSC4",5
GO:0071353,"GO:0071353","cellular response to interleukin-4","5/649","25/11852",0.0103264327045172,0.0103264327045172,0.16162919158993,"HSPA5/MCM2/XBP1/IMPDH2/RPL3",5
GO:0071897,"GO:0071897","DNA biosynthetic process","17/649","168/11852",0.0106180892324897,0.0106180892324897,0.165518609644672,"LIG3/POLD3/MAP3K4/USP10/DNAJC2/SMG7/DKC1/NAT10/ANKRD1/TFDP1/PINX1/TELO2/RPA2/CCT6A/POLE3/NOP10/UBA52",17
GO:0042866,"GO:0042866","pyruvate biosynthetic process","11/649","91/11852",0.0106982895176741,0.0106982895176741,0.166093623323618,"NUP160/PKM/TIGAR/NUP50/OGDH/NUP98/NUP153/ALDOA/HK2/ZBTB7A/EIF6",11
GO:0006270,"GO:0006270","DNA replication initiation","6/649","35/11852",0.0109752293568286,0.0109752293568286,0.169706114375749,"MCM2/ORC1/MCM4/MCM3/MCM7/POLE3",6
GO:0034504,"GO:0034504","protein localization to nucleus","21/649","224/11852",0.0112954215823614,0.0112954215823614,0.173955699955791,"POLR1A/NUP50/KPNB1/ZPR1/NUP98/BYSL/NUP153/MED1/DKC1/NOLC1/ZBTB7A/RRS1/FLNA/PINX1/HYAL2/RPL23/NXT1/CCT6A/PLRG1/BANP/PTTG1IP",21
GO:0043044,"GO:0043044","ATP-dependent chromatin remodeling","9/649","68/11852",0.0114389821239512,0.0114389821239512,0.175461944747597,"PSME4/NASP/CENPO/RUVBL1/PTMA/MBD3/ACTR5/SMARCD2/POLE3",9
GO:0071156,"GO:0071156","regulation of cell cycle arrest","11/649","92/11852",0.0115708979352706,0.0115708979352706,0.17677828130925,"CCNK/E2F1/CNOT1/MYBBP1A/SDE2/PLK2/TFDP1/E2F4/RPL23/PRMT1/SETMAR",11
GO:0006984,"GO:0006984","ER-nucleus signaling pathway","7/649","46/11852",0.0118692601979185,0.0118692601979185,0.178613973877543,"HSPA5/PPP1R15A/XBP1/ATF4/EIF2S1/DDIT3/FBXW7",7
GO:0033260,"GO:0033260","nuclear DNA replication","8/649","57/11852",0.0118989663909722,0.0118989663909722,0.178613973877543,"MCM2/POLD3/MCM4/MCM3/MCM7/RPA2/POLE3/FEN1",8
GO:0016075,"GO:0016075","rRNA catabolic process","4/649","17/11852",0.011970519275927,0.011970519275927,0.178613973877543,"EXOSC7/EXOSC5/EXOSC2/EXOSC4",4
GO:0031498,"GO:0031498","chromatin disassembly","4/649","17/11852",0.011970519275927,0.011970519275927,0.178613973877543,"SUPT16H/GRWD1/HMGA1/SMARCD2",4
GO:0032968,"GO:0032968","positive regulation of transcription elongation from RNA polymerase II promoter","4/649","17/11852",0.011970519275927,0.011970519275927,0.178613973877543,"SUPT16H/ELL/SUPT6H/ELOC",4
GO:0045947,"GO:0045947","negative regulation of translational initiation","4/649","17/11852",0.011970519275927,0.011970519275927,0.178613973877543,"ATF4/EIF2S1/EIF4EBP1/RPL13A",4
GO:0006165,"GO:0006165","nucleoside diphosphate phosphorylation","12/649","105/11852",0.0120956176202464,0.0120956176202464,0.179781048513087,"NUP160/PKM/TIGAR/NUP50/OGDH/NUP98/NUP153/ALDOA/HK2/ZBTB7A/NME1/EIF6",12
GO:0032259,"GO:0032259","methylation","26/649","297/11852",0.0122147900563182,0.0122147900563182,0.1802671278124,"NSUN2/METTL1/TRMT6/PRMT5/FBL/FTSJ3/SUPT6H/NOP2/ETF1/TGS1/SETD7/WDR4/METTL3/TRMT61A/BUD23/MBD3/TRMT1/EEF2KMT/MRM2/SNRPB/PRMT1/EMG1/NTMT1/SETMAR/WDR5/SPOUT1",26
GO:0070670,"GO:0070670","response to interleukin-4","5/649","26/11852",0.0122223388881863,0.0122223388881863,0.1802671278124,"HSPA5/MCM2/XBP1/IMPDH2/RPL3",5
GO:0030099,"GO:0030099","myeloid cell differentiation","25/649","283/11852",0.0124426643757401,0.0124426643757401,0.182813576611498,"WDR1/MYH9/ACIN1/HSPA9/MED1/ZFP36/RIPK1/THBS1/SLC25A38/LYAR/JUN/ZBTB7A/PRKX/NME1/FARP2/CA2/RPS19/FBXW7/PRMT1/RPS6/RPS14/ESRRA/WDR5/EIF6/CEBPA",25
GO:0030218,"GO:0030218","erythrocyte differentiation","11/649","93/11852",0.0124968082922959,0.0124968082922959,0.182908286897685,"ACIN1/HSPA9/MED1/ZFP36/SLC25A38/LYAR/ZBTB7A/RPS19/PRMT1/RPS6/RPS14",11
GO:0031497,"GO:0031497","chromatin assembly","10/649","81/11852",0.0126821809617958,0.0126821809617958,0.184915690389523,"MCM2/SART3/GRWD1/NASP/HMGA1/CENPO/CHAF1A/RUVBL1/BRD2/POLE3",10
GO:0032784,"GO:0032784","regulation of DNA-templated transcription, elongation","7/649","47/11852",0.0133072689865011,0.0133072689865011,0.193294979736138,"CCNK/SUPT16H/ELL/SUPT6H/CCAR2/ERCC6/ELOC",7
GO:0006310,"GO:0006310","DNA recombination","21/649","228/11852",0.0136069113007663,0.0136069113007663,0.196194068048296,"LIG3/MCM2/UNG/RAD54L/APEX1/MCM4/SUPT6H/MCM3/MSH6/GINS2/PSMC3IP/SUPV3L1/MCM7/RUVBL1/XRCC2/RBM14/CCNB1IP1/ACTR5/RPA2/AUNIP/FEN1",21
GO:0006839,"GO:0006839","mitochondrial transport","20/649","214/11852",0.0136366797503873,0.0136366797503873,0.196194068048296,"USP36/TIMM21/HUWE1/PPP1R13B/E2F1/TIMM50/PPIF/GRPEL1/TOMM40/SLC25A38/HK2/LETM1/TFDP1/TIMM23/TIMM13/TSPO/TIMM44/FBXW7/CHCHD4/PMPCA",20
GO:0000288,"GO:0000288","nuclear-transcribed mRNA catabolic process, deadenylation-dependent decay","9/649","70/11852",0.0137115041792743,0.0137115041792743,0.196194068048296,"SAMD4A/CNOT1/ZFP36/NOCT/NANOS1/EXOSC7/EXOSC5/EXOSC2/EXOSC4",9
GO:0006446,"GO:0006446","regulation of translational initiation","9/649","70/11852",0.0137115041792743,0.0137115041792743,0.196194068048296,"PPP1R15A/EIF3B/ATF4/EIF2S1/METTL3/EIF4EBP1/EIF4H/RPL13A/EIF4A2",9
GO:2001242,"GO:2001242","regulation of intrinsic apoptotic signaling pathway","14/649","133/11852",0.0140719004956954,0.0140719004956954,0.199977198597431,"PLAUR/DNAJA1/XBP1/PPIF/BCL2L2/CCAR2/DDIT3/RRN3/FBXW7/TRAP1/RPS3/RPS7/PTTG1IP/RACK1",14
GO:0007565,"GO:0007565","female pregnancy","13/649","120/11852",0.0140998559587583,0.0140998559587583,0.199977198597431,"EPN1/CAD/DHODH/C1QBP/BYSL/UMPS/POLR1B/MED1/MMP7/ADM/FOSL1/RPL29/IGFBP7",13
GO:0006213,"GO:0006213","pyrimidine nucleoside metabolic process","6/649","37/11852",0.0143355434738446,0.0143355434738446,0.199977198597431,"CAD/DHODH/UMPS/UCK2/CTPS1/NME1",6
GO:0030488,"GO:0030488","tRNA methylation","6/649","37/11852",0.0143355434738446,0.0143355434738446,0.199977198597431,"NSUN2/METTL1/TRMT6/WDR4/TRMT61A/TRMT1",6
GO:0000083,"GO:0000083","regulation of transcription involved in G1/S transition of mitotic cell cycle","5/649","27/11852",0.0143409396468786,0.0143409396468786,0.199977198597431,"ORC1/E2F1/ZPR1/TFDP1/E2F4",5
GO:0006362,"GO:0006362","transcription elongation from RNA polymerase I promoter","5/649","27/11852",0.0143409396468786,0.0143409396468786,0.199977198597431,"POLR1A/POLR1B/POLR1E/ERCC6/POLR1C",5
GO:0050686,"GO:0050686","negative regulation of mRNA processing","5/649","27/11852",0.0143409396468786,0.0143409396468786,0.199977198597431,"PTBP1/C1QBP/SRSF7/SRSF4/RNPS1",5
GO:0007589,"GO:0007589","body fluid secretion","8/649","59/11852",0.0145196227591914,0.0145196227591914,0.200403235829333,"WNK1/CAD/XBP1/DHODH/UMPS/MED1/HK2/NME1",8
GO:0009396,"GO:0009396","folic acid-containing compound biosynthetic process","3/649","10/11852",0.0146830823761972,0.0146830823761972,0.200403235829333,"MTHFD1/MTHFD1L/GART",3
GO:0036500,"GO:0036500","ATF6-mediated unfolded protein response","3/649","10/11852",0.0146830823761972,0.0146830823761972,0.200403235829333,"HSPA5/XBP1/DDIT3",3
GO:1901836,"GO:1901836","regulation of transcription of nucleolar large rRNA by RNA polymerase I","3/649","10/11852",0.0146830823761972,0.0146830823761972,0.200403235829333,"NCL/IPPK/NOL11",3
GO:0034471,"GO:0034471","ncRNA 5'-end processing","4/649","18/11852",0.0147373117976059,0.0147373117976059,0.200403235829333,"NOP14/POP1/UTP20/ABT1",4
GO:1901798,"GO:1901798","positive regulation of signal transduction by p53 class mediator","4/649","18/11852",0.0147373117976059,0.0147373117976059,0.200403235829333,"DDX5/ANKRD1/RPL23/RPS7",4
GO:1904872,"GO:1904872","regulation of telomerase RNA localization to Cajal body","4/649","18/11852",0.0147373117976059,0.0147373117976059,0.200403235829333,"DKC1/RUVBL1/CCT6A/NOP10",4
GO:0006338,"GO:0006338","chromatin remodeling","15/649","148/11852",0.0155806209319659,0.0155806209319659,0.211122194737407,"BAZ1B/PSME4/SUPT6H/NASP/HMGA1/CENPO/CHD7/RUVBL1/ZBTB7A/PTMA/MBD3/ACTR5/NPM3/SMARCD2/POLE3",15
GO:0065004,"GO:0065004","protein-DNA complex assembly","16/649","162/11852",0.0160182272555634,0.0160182272555634,0.216287627472266,"MCM2/SART3/MCM4/GRWD1/MCM3/NASP/POLR1E/CENPO/MCM7/CHAF1A/RUVBL1/BRD2/RRN3/RPA2/POLE3/UBA52",16
GO:0032623,"GO:0032623","interleukin-2 production","6/649","38/11852",0.0162583858661404,0.0162583858661404,0.218760109733517,"EZR/TRAF2/ZFP36/PNP/TRIM27/RPS3",6
GO:0009152,"GO:0009152","purine ribonucleotide biosynthetic process","19/649","204/11852",0.0164728417893098,0.0164728417893098,0.220870675886844,"AK2/NUP160/PKM/TIGAR/NUP50/OGDH/NUP98/NUP153/ALDOA/GART/HK2/IMPDH2/ZBTB7A/NME1/ACLY/GUK1/UQCC3/TMSB4X/EIF6",19
GO:0072528,"GO:0072528","pyrimidine-containing compound biosynthetic process","7/649","49/11852",0.0165506632252934,0.0165506632252934,0.221140899063796,"CAD/DHODH/UMPS/UCK2/CTPS1/NME1/PRPS1",7
GO:0006353,"GO:0006353","DNA-templated transcription, termination","9/649","73/11852",0.0177239656337938,0.0177239656337938,0.233168974663067,"POLR1A/PRMT5/POLR1B/SYMPK/POLR1E/SNRPB/POLR3K/POLR1C/CAVIN1",9
GO:0032042,"GO:0032042","mitochondrial DNA metabolic process","4/649","19/11852",0.0178765014063669,0.0178765014063669,0.233168974663067,"LIG3/DNAJA3/TWNK/LONP1",4
GO:0090670,"GO:0090670","RNA localization to Cajal body","4/649","19/11852",0.0178765014063669,0.0178765014063669,0.233168974663067,"DKC1/RUVBL1/CCT6A/NOP10",4
GO:0090671,"GO:0090671","telomerase RNA localization to Cajal body","4/649","19/11852",0.0178765014063669,0.0178765014063669,0.233168974663067,"DKC1/RUVBL1/CCT6A/NOP10",4
GO:0090672,"GO:0090672","telomerase RNA localization","4/649","19/11852",0.0178765014063669,0.0178765014063669,0.233168974663067,"DKC1/RUVBL1/CCT6A/NOP10",4
GO:0090685,"GO:0090685","RNA localization to nucleus","4/649","19/11852",0.0178765014063669,0.0178765014063669,0.233168974663067,"DKC1/RUVBL1/CCT6A/NOP10",4
GO:1903205,"GO:1903205","regulation of hydrogen peroxide-induced cell death","4/649","19/11852",0.0178765014063669,0.0178765014063669,0.233168974663067,"RIPK1/TRAP1/PYCR1/RACK1",4
GO:0006457,"GO:0006457","protein folding","18/649","192/11852",0.0181117632987461,0.0181117632987461,0.235436766092175,"HSPA5/DNAJA1/DNAJA3/DNAJC2/PPIF/GRPEL1/HSPA9/TTC1/PFDN2/DNAJC7/GNAI1/DNAJA2/PPIE/PDRG1/TRAP1/EMC6/CCT6A/CHCHD4",18
GO:0071364,"GO:0071364","cellular response to epidermal growth factor stimulus","6/649","39/11852",0.0183520568313661,0.0183520568313661,0.236158753220299,"CAD/ZPR1/NCL/MED1/ZFP36/MCM7",6
GO:2000378,"GO:2000378","negative regulation of reactive oxygen species metabolic process","6/649","39/11852",0.0183520568313661,0.0183520568313661,0.236158753220299,"TIGAR/KHSRP/HK2/AATF/TSPO/TRAP1",6
GO:2001238,"GO:2001238","positive regulation of extrinsic apoptotic signaling pathway","6/649","39/11852",0.0183520568313661,0.0183520568313661,0.236158753220299,"TRAF2/RIPK1/THBS1/PEA15/TNFRSF12A/HYAL2",6
GO:0040029,"GO:0040029","regulation of gene expression, epigenetic","26/649","308/11852",0.0186747390688417,0.0186747390688417,0.238198872359095,"BAZ1B/NUP160/POLR1A/NUP50/DDX5/NUP98/ZNFX1/XPO5/NUP153/CNOT1/POLR1B/ZFP36/AJUBA/MYBBP1A/POLR1E/RIPK1/HMGA1/DDX21/METTL3/TRIM27/ERCC6/MBD3/POLE3/POLR1C/SPOUT1/EIF6",26
GO:0034644,"GO:0034644","cellular response to UV","9/649","74/11852",0.0192340959020526,0.0192340959020526,0.238198872359095,"POLD3/ATF4/EIF2S1/SDE2/CDC25A/METTL3/E2F4/HYAL2/ACTR5",9
GO:1900034,"GO:1900034","regulation of cellular response to heat","9/649","74/11852",0.0192340959020526,0.0192340959020526,0.238198872359095,"NUP160/NUP50/DNAJC2/NUP98/NUP153/CCAR2/DNAJC7/RPA2/IER5",9
GO:0006363,"GO:0006363","termination of RNA polymerase I transcription","5/649","29/11852",0.019286657587912,0.019286657587912,0.238198872359095,"POLR1A/POLR1B/POLR1E/POLR1C/CAVIN1",5
GO:0000491,"GO:0000491","small nucleolar ribonucleoprotein complex assembly","3/649","11/11852",0.0193802211823321,0.0193802211823321,0.238198872359095,"SNU13/ZNHIT6/RUVBL1",3
GO:0006241,"GO:0006241","CTP biosynthetic process","3/649","11/11852",0.0193802211823321,0.0193802211823321,0.238198872359095,"UCK2/CTPS1/NME1",3
GO:0042023,"GO:0042023","DNA endoreduplication","3/649","11/11852",0.0193802211823321,0.0193802211823321,0.238198872359095,"ZPR1/MSH6/FBXW7",3
GO:0043032,"GO:0043032","positive regulation of macrophage activation","3/649","11/11852",0.0193802211823321,0.0193802211823321,0.238198872359095,"THBS1/TNIP2/CEBPA",3
GO:0046036,"GO:0046036","CTP metabolic process","3/649","11/11852",0.0193802211823321,0.0193802211823321,0.238198872359095,"UCK2/CTPS1/NME1",3
GO:0070475,"GO:0070475","rRNA base methylation","3/649","11/11852",0.0193802211823321,0.0193802211823321,0.238198872359095,"NOP2/BUD23/EMG1",3
GO:0072574,"GO:0072574","hepatocyte proliferation","3/649","11/11852",0.0193802211823321,0.0193802211823321,0.238198872359095,"XBP1/MED1/FBXW7",3
GO:0072575,"GO:0072575","epithelial cell proliferation involved in liver morphogenesis","3/649","11/11852",0.0193802211823321,0.0193802211823321,0.238198872359095,"XBP1/MED1/FBXW7",3
GO:1900102,"GO:1900102","negative regulation of endoplasmic reticulum unfolded protein response","3/649","11/11852",0.0193802211823321,0.0193802211823321,0.238198872359095,"HSPA5/PPP1R15A/RACK1",3
GO:1901070,"GO:1901070","guanosine-containing compound biosynthetic process","3/649","11/11852",0.0193802211823321,0.0193802211823321,0.238198872359095,"IMPDH2/NME1/GUK1",3
GO:0000723,"GO:0000723","telomere maintenance","14/649","139/11852",0.0200069337983552,0.0200069337983552,0.245116057936465,"POLD3/MAP3K4/APEX1/SMG7/DKC1/NAT10/GNL3/PINX1/TELO2/RPA2/CCT6A/POLE3/FEN1/NOP10",14
GO:0032200,"GO:0032200","telomere organization","14/649","140/11852",0.0211563377668631,0.0211563377668631,0.258372572861824,"POLD3/MAP3K4/APEX1/SMG7/DKC1/NAT10/GNL3/PINX1/TELO2/RPA2/CCT6A/POLE3/FEN1/NOP10",14
GO:0000966,"GO:0000966","RNA 5'-end processing","4/649","20/11852",0.0214010926634104,0.0214010926634104,0.258888197153592,"NOP14/POP1/UTP20/ABT1",4
GO:0006144,"GO:0006144","purine nucleobase metabolic process","4/649","20/11852",0.0214010926634104,0.0214010926634104,0.258888197153592,"MTHFD1/MTHFD1L/GART/PRPS1",4
GO:2000637,"GO:2000637","positive regulation of gene silencing by miRNA","4/649","20/11852",0.0214010926634104,0.0214010926634104,0.258888197153592,"DDX5/ZFP36/AJUBA/RIPK1",4
GO:0016073,"GO:0016073","snRNA metabolic process","10/649","88/11852",0.0217178136910766,0.0217178136910766,0.261072414705798,"CCNK/ELL/DKC1/INTS7/EXOSC7/EXOSC5/EXOSC2/TOE1/EXOSC4/NOP10",10
GO:0070125,"GO:0070125","mitochondrial translational elongation","10/649","88/11852",0.0217178136910766,0.0217178136910766,0.261072414705798,"MRPL32/MRPS26/MRPL17/MRPL27/MRPS12/MRPS25/MRPS9/MRPL14/MRPL20/MRPS21",10
GO:0051225,"GO:0051225","spindle assembly","11/649","101/11852",0.02205736464489,0.02205736464489,0.264325590135968,"ZNF207/CHMP4B/BCCIP/KPNB1/RCC1/FLNA/WRAP73/HAUS2/RPS3/DRG1/HAUS7",11
GO:0045214,"GO:0045214","sarcomere organization","5/649","30/11852",0.0221319177137389,0.0221319177137389,0.264392773343666,"WDR1/TPM1/ANKRD1/KRT8/ACTG1",5
GO:0072332,"GO:0072332","intrinsic apoptotic signaling pathway by p53 class mediator","8/649","64/11852",0.0228682790900468,0.0228682790900468,0.272341094230273,"PPP1R13B/E2F1/DDX5/MYBBP1A/RRN3/RPS7/AEN/PTTG1IP",8
GO:0000959,"GO:0000959","mitochondrial RNA metabolic process","6/649","41/11852",0.0230768733438571,0.0230768733438571,0.273128816087301,"ELAC2/TWNK/SUPV3L1/PUS1/TBRG4/YARS2",6
GO:0043486,"GO:0043486","histone exchange","6/649","41/11852",0.0230768733438571,0.0230768733438571,0.273128816087301,"PSME4/NASP/CENPO/RUVBL1/PTMA/POLE3",6
GO:0016052,"GO:0016052","carbohydrate catabolic process","15/649","156/11852",0.0239670614326135,0.0239670614326135,0.282791918377363,"NUP160/PKM/TIGAR/NUP50/OGDH/NUP98/NUP153/SORD/ALDOA/HK2/ZBTB7A/SCARB2/PYGB/MAN2C1/EIF6",15
GO:0006264,"GO:0006264","mitochondrial DNA replication","3/649","12/11852",0.0248079643185299,0.0248079643185299,0.29003663033506,"LIG3/DNAJA3/TWNK",3
GO:0072576,"GO:0072576","liver morphogenesis","3/649","12/11852",0.0248079643185299,0.0248079643185299,0.29003663033506,"XBP1/MED1/FBXW7",3
GO:1904816,"GO:1904816","positive regulation of protein localization to chromosome, telomeric region","3/649","12/11852",0.0248079643185299,0.0248079643185299,0.29003663033506,"DKC1/GNL3/CCT6A",3
GO:0032663,"GO:0032663","regulation of interleukin-2 production","5/649","31/11852",0.0252360701108174,0.0252360701108174,0.293253599405767,"EZR/TRAF2/ZFP36/TRIM27/RPS3",5
GO:0042026,"GO:0042026","protein refolding","5/649","31/11852",0.0252360701108174,0.0252360701108174,0.293253599405767,"HSPA5/PPIF/HSPA9/DNAJA2/PPIE",5
GO:0070849,"GO:0070849","response to epidermal growth factor","6/649","42/11852",0.025719525370549,0.025719525370549,0.29796861480334,"CAD/ZPR1/NCL/MED1/ZFP36/MCM7",6
GO:0006606,"GO:0006606","protein import into nucleus","12/649","117/11852",0.0263707039625762,0.0263707039625762,0.304592500113079,"NUP50/KPNB1/ZPR1/NUP98/NUP153/MED1/NOLC1/FLNA/HYAL2/RPL23/NXT1/PTTG1IP",12
GO:0050810,"GO:0050810","regulation of steroid biosynthetic process","8/649","66/11852",0.0270005258491621,0.0270005258491621,0.310930664354347,"NFYA/KPNB1/ADM/SF1/DHCR7/TSPO/PMVK/IGFBP7",8
GO:0060147,"GO:0060147","regulation of posttranscriptional gene silencing","9/649","79/11852",0.0282040726742277,0.0282040726742277,0.321890466015701,"NUP160/NUP50/DDX5/NUP98/XPO5/NUP153/ZFP36/AJUBA/RIPK1",9
GO:0060966,"GO:0060966","regulation of gene silencing by RNA","9/649","79/11852",0.0282040726742277,0.0282040726742277,0.321890466015701,"NUP160/NUP50/DDX5/NUP98/XPO5/NUP153/ZFP36/AJUBA/RIPK1",9
GO:2001243,"GO:2001243","negative regulation of intrinsic apoptotic signaling pathway","9/649","79/11852",0.0282040726742277,0.0282040726742277,0.321890466015701,"PLAUR/DNAJA1/XBP1/PPIF/BCL2L2/CCAR2/RRN3/TRAP1/PTTG1IP",9
GO:0032781,"GO:0032781","positive regulation of ATPase activity","6/649","43/11852",0.0285559690569508,0.0285559690569508,0.32358766443538,"DNAJA1/TPM1/DNAJA2/SETMAR/TMSB4X/DNAJC9",6
GO:0043392,"GO:0043392","negative regulation of DNA binding","6/649","43/11852",0.0285559690569508,0.0285559690569508,0.32358766443538,"E2F1/DDIT3/JUN/FBXW7/ZNF593/TMSB4X",6
GO:0010761,"GO:0010761","fibroblast migration","5/649","32/11852",0.028605931191714,0.028605931191714,0.32358766443538,"ARHGEF7/CORO1C/THBS1/HYAL2/SDC4",5
GO:0031503,"GO:0031503","protein-containing complex localization","21/649","246/11852",0.0289900150989271,0.0289900150989271,0.326967879273658,"NUP160/EZR/NUP50/SUPT6H/NUP98/SRSF7/SRSF4/SMG7/NUP153/SYMPK/NXF1/KLHL21/NOL6/RRS1/RNPS1/EIF5A/NXT1/EIF4A3/ZNF593/SRSF2/EIF6",21
GO:0007004,"GO:0007004","telomere maintenance via telomerase","8/649","67/11852",0.0292494748203148,0.0292494748203148,0.327965025455238,"MAP3K4/SMG7/DKC1/NAT10/PINX1/TELO2/CCT6A/NOP10",8
GO:1903313,"GO:1903313","positive regulation of mRNA metabolic process","8/649","67/11852",0.0292494748203148,0.0292494748203148,0.327965025455238,"THRAP3/KHSRP/NUP98/CNOT1/ZFP36/METTL3/NANOS1/HNRNPR",8
GO:0036474,"GO:0036474","cell death in response to hydrogen peroxide","4/649","22/11852",0.0296462226366883,0.0296462226366883,0.330480994692336,"RIPK1/TRAP1/PYCR1/RACK1",4
GO:2001038,"GO:2001038","regulation of cellular response to drug","4/649","22/11852",0.0296462226366883,0.0296462226366883,0.330480994692336,"RIPK1/TRAP1/PYCR1/RACK1",4
GO:0009166,"GO:0009166","nucleotide catabolic process","14/649","147/11852",0.0306377592673613,0.0306377592673613,0.336390998208452,"NUP160/PKM/UNG/TIGAR/NUP50/OGDH/NUP98/NUP153/ALDOA/HK2/ZBTB7A/PNP/DCTPP1/EIF6",14
GO:0000054,"GO:0000054","ribosomal subunit export from nucleus","3/649","13/11852",0.030965885602307,0.030965885602307,0.336390998208452,"RRS1/ZNF593/EIF6",3
GO:0032703,"GO:0032703","negative regulation of interleukin-2 production","3/649","13/11852",0.030965885602307,0.030965885602307,0.336390998208452,"EZR/ZFP36/TRIM27",3
GO:0033750,"GO:0033750","ribosome localization","3/649","13/11852",0.030965885602307,0.030965885602307,0.336390998208452,"RRS1/ZNF593/EIF6",3
GO:0042730,"GO:0042730","fibrinolysis","3/649","13/11852",0.030965885602307,0.030965885602307,0.336390998208452,"PLAUR/PLAU/THBS1",3
GO:1901032,"GO:1901032","negative regulation of response to reactive oxygen species","3/649","13/11852",0.030965885602307,0.030965885602307,0.336390998208452,"TRAP1/PYCR1/RACK1",3
GO:1903206,"GO:1903206","negative regulation of hydrogen peroxide-induced cell death","3/649","13/11852",0.030965885602307,0.030965885602307,0.336390998208452,"TRAP1/PYCR1/RACK1",3
GO:1904814,"GO:1904814","regulation of protein localization to chromosome, telomeric region","3/649","13/11852",0.030965885602307,0.030965885602307,0.336390998208452,"DKC1/GNL3/CCT6A",3
GO:2001039,"GO:2001039","negative regulation of cellular response to drug","3/649","13/11852",0.030965885602307,0.030965885602307,0.336390998208452,"TRAP1/PYCR1/RACK1",3
GO:0002262,"GO:0002262","myeloid cell homeostasis","12/649","120/11852",0.0313337596367445,0.0313337596367445,0.339425769719477,"ACIN1/HSPA9/MED1/ZFP36/RPS24/SLC25A38/LYAR/ZBTB7A/RPS19/PRMT1/RPS6/RPS14",12
GO:2001233,"GO:2001233","regulation of apoptotic signaling pathway","26/649","323/11852",0.0315130323067984,0.0315130323067984,0.340406157727699,"PLAUR/NLE1/DNAJA1/PPP1R13B/XBP1/E2F1/PPIF/TNFRSF10B/TRAF2/BCL2L2/RIPK1/THBS1/CCAR2/PEA15/DDIT3/BDNF/TFDP1/TNFRSF12A/HYAL2/RRN3/FBXW7/TRAP1/RPS3/RPS7/PTTG1IP/RACK1",26
GO:0010821,"GO:0010821","regulation of mitochondrion organization","15/649","162/11852",0.032197122793045,0.032197122793045,0.342562144975954,"LIG3/PLAUR/USP36/TIGAR/HUWE1/PPP1R13B/MIEF1/E2F1/DHODH/PPIF/HK2/TFDP1/INF2/TSPO/FBXW7",15
GO:0006409,"GO:0006409","tRNA export from nucleus","5/649","33/11852",0.03224736870103,0.03224736870103,0.342562144975954,"NUP160/NUP50/NUP98/NUP153/NOL6",5
GO:0071431,"GO:0071431","tRNA-containing ribonucleoprotein complex export from nucleus","5/649","33/11852",0.03224736870103,0.03224736870103,0.342562144975954,"NUP160/NUP50/NUP98/NUP153/NOL6",5
GO:1902475,"GO:1902475","L-alpha-amino acid transmembrane transport","5/649","33/11852",0.03224736870103,0.03224736870103,0.342562144975954,"SLC7A6/SLC7A5/SLC1A5/SLC25A38/SLC3A2",5
GO:0070059,"GO:0070059","intrinsic apoptotic signaling pathway in response to endoplasmic reticulum stress","7/649","56/11852",0.0322486103814174,0.0322486103814174,0.342562144975954,"PPP1R15A/XBP1/TNFRSF10B/TRAF2/ATF4/DDIT3/CHAC1",7
GO:0090307,"GO:0090307","mitotic spindle assembly","7/649","56/11852",0.0322486103814174,0.0322486103814174,0.342562144975954,"ZNF207/CHMP4B/BCCIP/KPNB1/FLNA/WRAP73/DRG1",7
GO:0044706,"GO:0044706","multi-multicellular organism process","13/649","135/11852",0.0336620318966481,0.0336620318966481,0.356588491420439,"EPN1/CAD/DHODH/C1QBP/BYSL/UMPS/POLR1B/MED1/MMP7/ADM/FOSL1/RPL29/IGFBP7",13
GO:0006278,"GO:0006278","RNA-dependent DNA biosynthetic process","8/649","69/11852",0.0341274509535231,0.0341274509535231,0.360522847103624,"MAP3K4/SMG7/DKC1/NAT10/PINX1/TELO2/CCT6A/NOP10",8
GO:0006297,"GO:0006297","nucleotide-excision repair, DNA gap filling","4/649","23/11852",0.0343806317621645,0.0343806317621645,0.361207329515689,"LIG3/POLD3/RPA2/UBA52",4
GO:2000765,"GO:2000765","regulation of cytoplasmic translation","4/649","23/11852",0.0343806317621645,0.0343806317621645,0.361207329515689,"METTL3/DPH2/RPL13A/DPH7",4
GO:1903578,"GO:1903578","regulation of ATP metabolic process","10/649","95/11852",0.0347110580791746,0.0347110580791746,0.362928606014353,"NUP160/TIGAR/NUP50/PPIF/NUP98/NUP153/ZBTB7A/TSPO/TMSB4X/EIF6",10
GO:0009119,"GO:0009119","ribonucleoside metabolic process","9/649","82/11852",0.0348129736282023,0.0348129736282023,0.362928606014353,"CAD/DHODH/UMPS/UCK2/CTPS1/IMPDH2/PNP/NME1/GUK1",9
GO:0061014,"GO:0061014","positive regulation of mRNA catabolic process","6/649","45/11852",0.0348283943625083,0.0348283943625083,0.362928606014353,"KHSRP/CNOT1/ZFP36/METTL3/NANOS1/HNRNPR",6
GO:0046890,"GO:0046890","regulation of lipid biosynthetic process","13/649","136/11852",0.0354399065787239,0.0354399065787239,0.368258545819172,"NFYA/SCARB1/KPNB1/ADM/FABP5/SF1/DHCR7/TSPO/FBXW7/PMVK/IGFBP7/RACK1/EIF6",13
GO:1901292,"GO:1901292","nucleoside phosphate catabolic process","14/649","150/11852",0.0355319458840073,0.0355319458840073,0.368258545819172,"NUP160/PKM/UNG/TIGAR/NUP50/OGDH/NUP98/NUP153/ALDOA/HK2/ZBTB7A/PNP/DCTPP1/EIF6",14
GO:0019359,"GO:0019359","nicotinamide nucleotide biosynthetic process","11/649","109/11852",0.0361250680035119,0.0361250680035119,0.371807952614115,"NUP160/PKM/TIGAR/NUP50/OGDH/NUP98/NUP153/ALDOA/HK2/ZBTB7A/EIF6",11
GO:0019363,"GO:0019363","pyridine nucleotide biosynthetic process","11/649","109/11852",0.0361250680035119,0.0361250680035119,0.371807952614115,"NUP160/PKM/TIGAR/NUP50/OGDH/NUP98/NUP153/ALDOA/HK2/ZBTB7A/EIF6",11
GO:0051031,"GO:0051031","tRNA transport","5/649","34/11852",0.0361652890499071,0.0361652890499071,0.371807952614115,"NUP160/NUP50/NUP98/NUP153/NOL6",5
GO:0043470,"GO:0043470","regulation of carbohydrate catabolic process","8/649","70/11852",0.0367617666663295,0.0367617666663295,0.376929681861634,"NUP160/TIGAR/NUP50/NUP98/NUP153/ZBTB7A/SCARB2/EIF6",8
GO:0043009,"GO:0043009","chordate embryonic development","37/649","500/11852",0.0377739834180952,0.0377739834180952,0.381922903851344,"NSUN2/EPN1/NLE1/SEMA3C/MYH9/MTHFD1/HM13/ELL/SUPT6H/ZPR1/BYSL/MTHFD1L/MED1/NASP/WDR74/TPM1/RPL7L1/ADM/DVL3/NOLC1/NDEL1/KRT8/CHD7/FOSL1/IRX5/XRCC2/MBD3/RRN3/PHGDH/CCNB1IP1/SDC4/PRMT1/EMG1/EIF4A3/RPS7/RRP7A/CEBPA",37
GO:0043558,"GO:0043558","regulation of translational initiation in response to stress","3/649","14/11852",0.0378463267335534,0.0378463267335534,0.381922903851344,"PPP1R15A/ATF4/EIF2S1",3
GO:0071428,"GO:0071428","rRNA-containing ribonucleoprotein complex export from nucleus","3/649","14/11852",0.0378463267335534,0.0378463267335534,0.381922903851344,"RRS1/ZNF593/EIF6",3
GO:0080009,"GO:0080009","mRNA methylation","3/649","14/11852",0.0378463267335534,0.0378463267335534,0.381922903851344,"TRMT6/METTL3/TRMT61A",3
GO:1902969,"GO:1902969","mitotic DNA replication","3/649","14/11852",0.0378463267335534,0.0378463267335534,0.381922903851344,"MCM2/MCM4/MCM3",3
GO:2000651,"GO:2000651","positive regulation of sodium ion transmembrane transporter activity","3/649","14/11852",0.0378463267335534,0.0378463267335534,0.381922903851344,"WNK1/ACTN4/CNKSR3",3
GO:2001234,"GO:2001234","negative regulation of apoptotic signaling pathway","16/649","180/11852",0.0381597957534389,0.0381597957534389,0.38407552404967,"PLAUR/NLE1/DNAJA1/XBP1/PPIF/TNFRSF10B/TRAF2/BCL2L2/RIPK1/THBS1/CCAR2/PEA15/BDNF/RRN3/TRAP1/PTTG1IP",16
GO:0046148,"GO:0046148","pigment biosynthetic process","6/649","46/11852",0.0382722644871968,0.0382722644871968,0.384199116910603,"MTHFD1/MTHFD1L/SLC25A38/GART/TSPO/PRPS1",6
GO:0030330,"GO:0030330","DNA damage response, signal transduction by p53 class mediator","10/649","97/11852",0.0392487675521774,0.0392487675521774,0.392973093836972,"E2F1/USP10/DDX5/CNOT1/PLK2/ANKRD1/TFDP1/E2F4/PRMT1/PTTG1IP",10
GO:0048821,"GO:0048821","erythrocyte development","4/649","24/11852",0.0395283261072677,0.0395283261072677,0.394741480287216,"MED1/LYAR/ZBTB7A/RPS6",4
GO:2000677,"GO:2000677","regulation of transcription regulatory region DNA binding","5/649","35/11852",0.0403636323320869,0.0403636323320869,0.40203612463648,"DDIT3/ZBTB7A/FBXW7/ZNF593/TMSB4X",5
GO:0043462,"GO:0043462","regulation of ATPase activity","7/649","59/11852",0.0412837784092561,0.0412837784092561,0.410135818775348,"DNAJA1/PPIF/TPM1/DNAJA2/SETMAR/TMSB4X/DNAJC9",7
GO:0071158,"GO:0071158","positive regulation of cell cycle arrest","8/649","72/11852",0.0424329731335974,0.0424329731335974,0.420463269755733,"E2F1/CNOT1/MYBBP1A/PLK2/TFDP1/E2F4/RPL23/PRMT1",8
GO:0072525,"GO:0072525","pyridine-containing compound biosynthetic process","11/649","112/11852",0.0427404104814008,0.0427404104814008,0.422418110102396,"NUP160/PKM/TIGAR/NUP50/OGDH/NUP98/NUP153/ALDOA/HK2/ZBTB7A/EIF6",11
GO:0031571,"GO:0031571","mitotic G1 DNA damage checkpoint","7/649","60/11852",0.044626230835587,0.044626230835587,0.433415546772864,"E2F1/CNOT1/PLK2/TFDP1/E2F4/RPA2/PRMT1",7
GO:0044819,"GO:0044819","mitotic G1/S transition checkpoint","7/649","60/11852",0.044626230835587,0.044626230835587,0.433415546772864,"E2F1/CNOT1/PLK2/TFDP1/E2F4/RPA2/PRMT1",7
GO:0006281,"GO:0006281","DNA repair","36/649","491/11852",0.0448452600310484,0.0448452600310484,0.433415546772864,"LIG3/PSME4/MCM2/UNG/POLD3/TIGAR/RAD54L/HUWE1/SUPT16H/CLSPN/APEX1/USP10/MCM4/BCCIP/MCM3/MSH6/GINS2/HMGA1/CDCA5/REXO4/SSRP1/MCM7/CHAF1A/RUVBL1/ZBTB7A/XRCC2/ERCC6/RBM14/PPIE/ACTR5/RPA2/AUNIP/RPS3/FEN1/SETMAR/UBA52",36
GO:0006458,"GO:0006458","'de novo' protein folding","5/649","36/11852",0.044845374415561,0.044845374415561,0.433415546772864,"HSPA5/DNAJC2/HSPA9/DNAJC7/CHCHD4",5
GO:0015804,"GO:0015804","neutral amino acid transport","4/649","25/11852",0.0450905915173154,0.0450905915173154,0.433415546772864,"SLC7A5/SLC1A5/SLC25A38/SLC3A2",4
GO:0030224,"GO:0030224","monocyte differentiation","4/649","25/11852",0.0450905915173154,0.0450905915173154,0.433415546772864,"MYH9/ACIN1/MED1/JUN",4
GO:1900101,"GO:1900101","regulation of endoplasmic reticulum unfolded protein response","4/649","25/11852",0.0450905915173154,0.0450905915173154,0.433415546772864,"HSPA5/PPP1R15A/XBP1/RACK1",4
GO:1903131,"GO:1903131","mononuclear cell differentiation","4/649","25/11852",0.0450905915173154,0.0450905915173154,0.433415546772864,"MYH9/ACIN1/MED1/JUN",4
GO:0009259,"GO:0009259","ribonucleotide metabolic process","32/649","428/11852",0.0451758937473865,0.0451758937473865,0.433415546772864,"AK2/NUP160/PKM/TIGAR/CAD/NUP50/DHODH/OGDH/PPIF/NUP98/UMPS/NUP153/UCK2/ALDOA/GART/HK2/CTPS1/IMPDH2/ZBTB7A/NME1/AFG1L/UQCRB/TSPO/ACLY/GUK1/NDUFB11/ATP6V1B2/NDUFB9/PMVK/UQCC3/TMSB4X/EIF6",32
GO:0001732,"GO:0001732","formation of cytoplasmic translation initiation complex","3/649","15/11852",0.0454354645381709,0.0454354645381709,0.433415546772864,"EIF3D/EIF3B/EIF3A",3
GO:0008209,"GO:0008209","androgen metabolic process","3/649","15/11852",0.0454354645381709,0.0454354645381709,0.433415546772864,"SCARB1/MED1/ADM",3
GO:0010155,"GO:0010155","regulation of proton transport","3/649","15/11852",0.0454354645381709,0.0454354645381709,0.433415546772864,"PPIF/ACTN4/TMSB4X",3
GO:0032239,"GO:0032239","regulation of nucleobase-containing compound transport","3/649","15/11852",0.0454354645381709,0.0454354645381709,0.433415546772864,"SUPT6H/NUP153/RIPK1",3
GO:0042559,"GO:0042559","pteridine-containing compound biosynthetic process","3/649","15/11852",0.0454354645381709,0.0454354645381709,0.433415546772864,"MTHFD1/MTHFD1L/GART",3
GO:0098781,"GO:0098781","ncRNA transcription","10/649","100/11852",0.0467949381462308,0.0467949381462308,0.445276112489797,"CCNK/ELL/NCL/POLR1B/IPPK/NOL11/POLR1E/INTS7/NPM3/CAVIN1",10
GO:0044783,"GO:0044783","G1 DNA damage checkpoint","7/649","61/11852",0.0481378719249873,0.0481378719249873,0.456920967750726,"E2F1/CNOT1/PLK2/TFDP1/E2F4/RPA2/PRMT1",7
GO:2001169,"GO:2001169","regulation of ATP biosynthetic process","8/649","74/11852",0.0486546860940373,0.0486546860940373,0.460686215570053,"NUP160/TIGAR/NUP50/NUP98/NUP153/ZBTB7A/TMSB4X/EIF6",8
GO:0019693,"GO:0019693","ribose phosphate metabolic process","33/649","447/11852",0.0490923443058113,0.0490923443058113,0.462557552109307,"AK2/NUP160/PKM/TIGAR/CAD/NUP50/DHODH/OGDH/PPIF/NUP98/UMPS/NUP153/UCK2/ALDOA/GART/HK2/CTPS1/IMPDH2/ZBTB7A/NME1/AFG1L/UQCRB/TSPO/ACLY/GUK1/NDUFB11/PRPS1/ATP6V1B2/NDUFB9/PMVK/UQCC3/TMSB4X/EIF6",33
GO:0045637,"GO:0045637","regulation of myeloid cell differentiation","14/649","157/11852",0.049093570552584,0.049093570552584,0.462557552109307,"ACIN1/HSPA9/MED1/ZFP36/RIPK1/THBS1/JUN/NME1/CA2/FBXW7/PRMT1/ESRRA/WDR5/EIF6",14
GO:0044774,"GO:0044774","mitotic DNA integrity checkpoint","10/649","101/11852",0.0495133528167077,0.0495133528167077,0.465161412500949,"ORC1/CLSPN/E2F1/CNOT1/PLK2/TFDP1/E2F4/RPA2/PRMT1/SETMAR",10
GO:0097064,"GO:0097064","ncRNA export from nucleus","5/649","37/11852",0.0496125355002041,0.0496125355002041,0.465161412500949,"NUP160/NUP50/NUP98/NUP153/NOL6",5
GO:0010765,"GO:0010765","positive regulation of sodium ion transport","4/649","26/11852",0.0510666374498844,0.0510666374498844,0.477627112271961,"PKP2/WNK1/ACTN4/CNKSR3",4
GO:0060249,"GO:0060249","anatomical structure homeostasis","24/649","308/11852",0.0515637258726281,0.0515637258726281,0.481102966715288,"POLD3/MAP3K4/APEX1/CHMP4B/SMG7/DKC1/WDR36/NAT10/ALDOA/CACNA1D/GNL3/IQCB1/ACTG1/NANOS1/ERCC6/PINX1/DRAM2/TELO2/CA2/RPA2/CCT6A/POLE3/FEN1/NOP10",24
GO:0006110,"GO:0006110","regulation of glycolytic process","7/649","62/11852",0.0518205397176014,0.0518205397176014,0.482325565128314,"NUP160/TIGAR/NUP50/NUP98/NUP153/ZBTB7A/EIF6",7
GO:0060968,"GO:0060968","regulation of gene silencing","10/649","102/11852",0.052335415514103,0.052335415514103,0.485938368084305,"NUP160/NUP50/DDX5/NUP98/XPO5/NUP153/ZFP36/AJUBA/RIPK1/HMGA1",10
GO:0000075,"GO:0000075","cell cycle checkpoint","17/649","203/11852",0.0534786830758542,0.0534786830758542,0.490428771411715,"ZNF207/NSUN2/ORC1/CLSPN/E2F1/RPL24/CNOT1/INTS7/PLK2/CCAR2/PEA15/TFDP1/E2F4/RPA2/PRMT1/RPS6/SETMAR",17
GO:0002098,"GO:0002098","tRNA wobble uridine modification","3/649","16/11852",0.0537142684033143,0.0537142684033143,0.490428771411715,"TRMU/ELP5/CTU2",3
GO:0035357,"GO:0035357","peroxisome proliferator activated receptor signaling pathway","3/649","16/11852",0.0537142684033143,0.0537142684033143,0.490428771411715,"MED1/ACTN4/FABP5",3
GO:0043090,"GO:0043090","amino acid import","3/649","16/11852",0.0537142684033143,0.0537142684033143,0.490428771411715,"SLC1A5/SLC25A38/SLC3A2",3
GO:1900151,"GO:1900151","regulation of nuclear-transcribed mRNA catabolic process, deadenylation-dependent decay","3/649","16/11852",0.0537142684033143,0.0537142684033143,0.490428771411715,"CNOT1/ZFP36/NANOS1",3
GO:1900153,"GO:1900153","positive regulation of nuclear-transcribed mRNA catabolic process, deadenylation-dependent decay","3/649","16/11852",0.0537142684033143,0.0537142684033143,0.490428771411715,"CNOT1/ZFP36/NANOS1",3
GO:1902307,"GO:1902307","positive regulation of sodium ion transmembrane transport","3/649","16/11852",0.0537142684033143,0.0537142684033143,0.490428771411715,"WNK1/ACTN4/CNKSR3",3
GO:0001895,"GO:0001895","retina homeostasis","5/649","38/11852",0.0546661945356683,0.0546661945356683,0.497934608559669,"WDR36/IQCB1/ACTG1/ERCC6/DRAM2",5
GO:0010833,"GO:0010833","telomere maintenance via telomere lengthening","8/649","76/11852",0.0554406649588897,0.0554406649588897,0.502601324985033,"MAP3K4/SMG7/DKC1/NAT10/PINX1/TELO2/CCT6A/NOP10",8
GO:0060964,"GO:0060964","regulation of gene silencing by miRNA","8/649","76/11852",0.0554406649588897,0.0554406649588897,0.502601324985033,"NUP160/NUP50/DDX5/NUP98/NUP153/ZFP36/AJUBA/RIPK1",8
GO:0030811,"GO:0030811","regulation of nucleotide catabolic process","7/649","63/11852",0.0556757614464089,0.0556757614464089,0.503542201959453,"NUP160/TIGAR/NUP50/NUP98/NUP153/ZBTB7A/EIF6",7
GO:0006007,"GO:0006007","glucose catabolic process","4/649","27/11852",0.057453715328668,0.057453715328668,0.515971613317731,"PKM/TIGAR/ALDOA/HK2",4
GO:0032201,"GO:0032201","telomere maintenance via semi-conservative replication","4/649","27/11852",0.057453715328668,0.057453715328668,0.515971613317731,"POLD3/RPA2/POLE3/FEN1",4
GO:0070198,"GO:0070198","protein localization to chromosome, telomeric region","4/649","27/11852",0.057453715328668,0.057453715328668,0.515971613317731,"DKC1/GNL3/PINX1/CCT6A",4
GO:0009116,"GO:0009116","nucleoside metabolic process","10/649","104/11852",0.0582949025251293,0.0582949025251293,0.519374094115971,"CAD/DHODH/UMPS/UCK2/CTPS1/IMPDH2/PNP/NME1/GUK1/PRPS1",10
GO:0010822,"GO:0010822","positive regulation of mitochondrion organization","10/649","104/11852",0.0582949025251293,0.0582949025251293,0.519374094115971,"PLAUR/USP36/HUWE1/PPP1R13B/MIEF1/E2F1/PPIF/HK2/TFDP1/FBXW7",10
GO:0043618,"GO:0043618","regulation of transcription from RNA polymerase II promoter in response to stress","10/649","104/11852",0.0582949025251293,0.0582949025251293,0.519374094115971,"HSPA5/PSME4/ATF4/DDIT3/JUN/E2F4/ELOC/ELOB/PSMA5/UBA52",10
GO:0000724,"GO:0000724","double-strand break repair via homologous recombination","11/649","118/11852",0.0583743406082307,0.0583743406082307,0.519374094115971,"LIG3/MCM2/RAD54L/MCM4/MCM3/GINS2/MCM7/XRCC2/RPA2/AUNIP/FEN1",11
GO:0071478,"GO:0071478","cellular response to radiation","13/649","147/11852",0.0595898532669536,0.0595898532669536,0.528961587357485,"HSPA5/POLD3/ATF4/EIF2S1/INTS7/SDE2/CDC25A/METTL3/E2F4/HYAL2/ACTR5/EEF1D/POLE3",13
GO:0034724,"GO:0034724","DNA replication-independent nucleosome organization","5/649","39/11852",0.060006508903948,0.060006508903948,0.530205461889602,"SUPT16H/NASP/CENPO/RUVBL1/POLE3",5
GO:1903146,"GO:1903146","regulation of autophagy of mitochondrion","5/649","39/11852",0.060006508903948,0.060006508903948,0.530205461889602,"USP36/TIGAR/HK2/TSPO/FBXW7",5
GO:0000725,"GO:0000725","recombinational repair","11/649","119/11852",0.0613040043557505,0.0613040043557505,0.540330887090478,"LIG3/MCM2/RAD54L/MCM4/MCM3/GINS2/MCM7/XRCC2/RPA2/AUNIP/FEN1",11
GO:0007052,"GO:0007052","mitotic spindle organization","10/649","105/11852",0.061434272147372,0.061434272147372,0.540330887090478,"ZNF207/CHMP4B/BCCIP/KPNB1/PLK2/RCC1/FLNA/GNAI1/WRAP73/DRG1",10
GO:0006862,"GO:0006862","nucleotide transport","3/649","17/11852",0.0626593575020401,0.0626593575020401,0.547339741949244,"SLC25A19/EPG5/SLC25A17",3
GO:0070828,"GO:0070828","heterochromatin organization","3/649","17/11852",0.0626593575020401,0.0626593575020401,0.547339741949244,"HMGA1/SETD7/POLE3",3
GO:0099623,"GO:0099623","regulation of cardiac muscle cell membrane repolarization","3/649","17/11852",0.0626593575020401,0.0626593575020401,0.547339741949244,"WDR1/CACNA1D/FLNA",3
GO:0032210,"GO:0032210","regulation of telomere maintenance via telomerase","6/649","52/11852",0.0634125597626939,0.0634125597626939,0.552660179941373,"MAP3K4/SMG7/DKC1/NAT10/PINX1/CCT6A",6
GO:1903747,"GO:1903747","regulation of establishment of protein localization to mitochondrion","7/649","65/11852",0.0639084046810859,0.0639084046810859,0.55559225847801,"USP36/DNAJA1/HUWE1/PPP1R13B/E2F1/TFDP1/FBXW7",7
GO:1901031,"GO:1901031","regulation of response to reactive oxygen species","4/649","28/11852",0.0642472436179196,0.0642472436179196,0.55559225847801,"RIPK1/TRAP1/PYCR1/RACK1",4
GO:1902042,"GO:1902042","negative regulation of extrinsic apoptotic signaling pathway via death domain receptors","4/649","28/11852",0.0642472436179196,0.0642472436179196,0.55559225847801,"TNFRSF10B/TRAF2/RIPK1/PEA15",4
GO:0006090,"GO:0006090","pyruvate metabolic process","11/649","120/11852",0.0643285244650081,0.0643285244650081,0.55559225847801,"NUP160/PKM/TIGAR/NUP50/OGDH/NUP98/NUP153/ALDOA/HK2/ZBTB7A/EIF6",11
GO:0030239,"GO:0030239","myofibril assembly","5/649","40/11852",0.065632738786265,0.065632738786265,0.563052083829892,"WDR1/TPM1/ANKRD1/KRT8/ACTG1",5
GO:1903573,"GO:1903573","negative regulation of response to endoplasmic reticulum stress","5/649","40/11852",0.065632738786265,0.065632738786265,0.563052083829892,"HSPA5/PPP1R15A/XBP1/UBE2G2/RACK1",5
GO:1990090,"GO:1990090","cellular response to nerve growth factor stimulus","5/649","40/11852",0.065632738786265,0.065632738786265,0.563052083829892,"HSPA5/E2F1/BDNF/EIF4A3/RPS3",5
GO:1901654,"GO:1901654","response to ketone","12/649","135/11852",0.0663643202010166,0.0663643202010166,0.568057374277029,"TNC/CAD/AKAP8/NASP/THBS1/MSN/FOSL1/EIF4EBP1/NME1/GNAI1/TSPO/IGFBP7",12
GO:0031330,"GO:0031330","negative regulation of cellular catabolic process","17/649","209/11852",0.0665227362906801,0.0665227362906801,0.568145184168205,"THRAP3/USP36/YBX1/TIGAR/E2F1/CHMP4B/ZFP36/DKC1/TBC1D14/RBM38/SYNCRIP/NOCT/CCAR2/TSPO/RPL23/RPS7/UBE2G2",17
GO:0031570,"GO:0031570","DNA integrity checkpoint","13/649","150/11852",0.0677300641067781,0.0677300641067781,0.573633689789204,"ORC1/CLSPN/E2F1/CNOT1/INTS7/PLK2/CCAR2/PEA15/TFDP1/E2F4/RPA2/PRMT1/SETMAR",13
GO:0071482,"GO:0071482","cellular response to light stimulus","9/649","93/11852",0.0679001765711071,0.0679001765711071,0.573633689789204,"POLD3/ATF4/EIF2S1/SDE2/CDC25A/METTL3/E2F4/HYAL2/ACTR5",9
GO:2000278,"GO:2000278","regulation of DNA biosynthetic process","9/649","93/11852",0.0679001765711071,0.0679001765711071,0.573633689789204,"MAP3K4/DNAJC2/SMG7/DKC1/NAT10/ANKRD1/TFDP1/PINX1/CCT6A",9
GO:1900542,"GO:1900542","regulation of purine nucleotide metabolic process","10/649","107/11852",0.0680363134604721,0.0680363134604721,0.573633689789204,"NUP160/TIGAR/NUP50/PPIF/NUP98/NUP153/ZBTB7A/TSPO/TMSB4X/EIF6",10
GO:0031397,"GO:0031397","negative regulation of protein ubiquitination","7/649","66/11852",0.0682873055594497,0.0682873055594497,0.573633689789204,"DNAJA1/GTPBP4/PINX1/TSPO/RPL23/RPS3/RPS7",7
GO:0050000,"GO:0050000","chromosome localization","7/649","66/11852",0.0682873055594497,0.0682873055594497,0.573633689789204,"CHMP4B/KPNB1/NUP98/CDCA5/NDEL1/RRS1/PINX1",7
GO:0006977,"GO:0006977","DNA damage response, signal transduction by p53 class mediator resulting in cell cycle arrest","6/649","53/11852",0.0683620824655457,0.0683620824655457,0.573633689789204,"E2F1/CNOT1/PLK2/TFDP1/E2F4/PRMT1",6
GO:1903201,"GO:1903201","regulation of oxidative stress-induced cell death","6/649","53/11852",0.0683620824655457,0.0683620824655457,0.573633689789204,"ATF4/RIPK1/FBXW7/TRAP1/PYCR1/RACK1",6
GO:0048511,"GO:0048511","rhythmic process","17/649","210/11852",0.068889333681494,0.068889333681494,0.576795777066611,"NFYA/HSPA5/THRAP3/HUWE1/PRMT5/DDX5/ATF4/MYBBP1A/MMP7/NOCT/CCAR2/METTL3/JUN/IMPDH2/HNRNPR/FBXW7/RACK1",17
GO:0000002,"GO:0000002","mitochondrial genome maintenance","4/649","29/11852",0.0714409373827209,0.0714409373827209,0.585699436697859,"LIG3/DNAJA3/TWNK/LONP1",4
GO:0015949,"GO:0015949","nucleobase-containing small molecule interconversion","4/649","29/11852",0.0714409373827209,0.0714409373827209,0.585699436697859,"AK2/CTPS1/NME1/GUK1",4
GO:0034243,"GO:0034243","regulation of transcription elongation from RNA polymerase II promoter","4/649","29/11852",0.0714409373827209,0.0714409373827209,0.585699436697859,"SUPT16H/ELL/SUPT6H/ELOC",4
GO:0061157,"GO:0061157","mRNA destabilization","4/649","29/11852",0.0714409373827209,0.0714409373827209,0.585699436697859,"KHSRP/ZFP36/METTL3/HNRNPR",4
GO:2000279,"GO:2000279","negative regulation of DNA biosynthetic process","4/649","29/11852",0.0714409373827209,0.0714409373827209,0.585699436697859,"DNAJC2/NAT10/ANKRD1/PINX1",4
GO:0015807,"GO:0015807","L-amino acid transport","5/649","41/11852",0.0715432756532661,0.0715432756532661,0.585699436697859,"SLC7A6/SLC7A5/SLC1A5/SLC25A38/SLC3A2",5
GO:0043388,"GO:0043388","positive regulation of DNA binding","5/649","41/11852",0.0715432756532661,0.0715432756532661,0.585699436697859,"PLAUR/CDCA5/NME1/PINX1/EDF1",5
GO:0071398,"GO:0071398","cellular response to fatty acid","5/649","41/11852",0.0715432756532661,0.0715432756532661,0.585699436697859,"TNC/E2F1/AKAP8/NME1/IRS1",5
GO:1990089,"GO:1990089","response to nerve growth factor","5/649","41/11852",0.0715432756532661,0.0715432756532661,0.585699436697859,"HSPA5/E2F1/BDNF/EIF4A3/RPS3",5
GO:0002335,"GO:0002335","mature B cell differentiation","3/649","18/11852",0.072243766642927,0.072243766642927,0.585699436697859,"CDH17/XBP1/CMTM7",3
GO:0043555,"GO:0043555","regulation of translation in response to stress","3/649","18/11852",0.072243766642927,0.072243766642927,0.585699436697859,"PPP1R15A/ATF4/EIF2S1",3
GO:0046653,"GO:0046653","tetrahydrofolate metabolic process","3/649","18/11852",0.072243766642927,0.072243766642927,0.585699436697859,"MTHFD1/MTHFD1L/GART",3
GO:0071157,"GO:0071157","negative regulation of cell cycle arrest","3/649","18/11852",0.072243766642927,0.072243766642927,0.585699436697859,"CCNK/RPL23/SETMAR",3
GO:0086019,"GO:0086019","cell-cell signaling involved in cardiac conduction","3/649","18/11852",0.072243766642927,0.072243766642927,0.585699436697859,"PKP2/CACNA1D/FLNA",3
GO:0090140,"GO:0090140","regulation of mitochondrial fission","3/649","18/11852",0.072243766642927,0.072243766642927,0.585699436697859,"MIEF1/DHODH/INF2",3
GO:0019058,"GO:0019058","viral life cycle","21/649","273/11852",0.0726925910613378,0.0726925910613378,0.588094846183552,"NUP160/PVR/SCARB1/CCNK/NUP50/CHMP4B/TRIM35/SLC1A5/KPNB1/DDX5/NUP98/NUP153/ILF3/PCBP1/IFITM2/TRIM27/SCARB2/HYAL2/PPIE/SLC20A2/UBA52",21
GO:0072431,"GO:0072431","signal transduction involved in mitotic G1 DNA damage checkpoint","6/649","54/11852",0.0735293536846282,0.0735293536846282,0.589886446758644,"E2F1/CNOT1/PLK2/TFDP1/E2F4/PRMT1",6
GO:0075733,"GO:0075733","intracellular transport of virus","6/649","54/11852",0.0735293536846282,0.0735293536846282,0.589886446758644,"NUP160/NUP50/KPNB1/NUP98/NUP153/UBA52",6
GO:1902400,"GO:1902400","intracellular signal transduction involved in G1 DNA damage checkpoint","6/649","54/11852",0.0735293536846282,0.0735293536846282,0.589886446758644,"E2F1/CNOT1/PLK2/TFDP1/E2F4/PRMT1",6
GO:1903749,"GO:1903749","positive regulation of establishment of protein localization to mitochondrion","6/649","54/11852",0.0735293536846282,0.0735293536846282,0.589886446758644,"USP36/HUWE1/PPP1R13B/E2F1/TFDP1/FBXW7",6
GO:0022411,"GO:0022411","cellular component disassembly","33/649","464/11852",0.0738322851379338,0.0738322851379338,0.591080133518279,"USP36/WDR1/TIGAR/JMJD4/SUPT16H/ACIN1/GRWD1/MRPL32/KPNB1/ETF1/MRPS26/HMGA1/MMP7/MRRF/EPG5/MRPL17/HK2/DVL3/NDEL1/NOXO1/TSPO/SMARCD2/MRPL27/FBXW7/RPL23/MRPS12/MRPS25/EIF5A/MRPS9/WDR45B/MRPL14/MRPL20/MRPS21",33
GO:0009895,"GO:0009895","negative regulation of catabolic process","19/649","243/11852",0.0747628814087819,0.0747628814087819,0.597276372633737,"THRAP3/USP36/YBX1/TIGAR/E2F1/CHMP4B/ZFP36/DKC1/TBC1D14/RBM38/SYNCRIP/NOCT/CCAR2/FLNA/TSPO/RPL23/RPS7/BANP/UBE2G2",19
GO:0006140,"GO:0006140","regulation of nucleotide metabolic process","10/649","109/11852",0.0750735248501203,0.0750735248501203,0.597276372633737,"NUP160/TIGAR/NUP50/PPIF/NUP98/NUP153/ZBTB7A/TSPO/TMSB4X/EIF6",10
GO:0043620,"GO:0043620","regulation of DNA-templated transcription in response to stress","10/649","109/11852",0.0750735248501203,0.0750735248501203,0.597276372633737,"HSPA5/PSME4/ATF4/DDIT3/JUN/E2F4/ELOC/ELOB/PSMA5/UBA52",10
GO:0002761,"GO:0002761","regulation of myeloid leukocyte differentiation","7/649","68/11852",0.0775715975679932,0.0775715975679932,0.612106477079988,"ACIN1/RIPK1/JUN/NME1/CA2/FBXW7/ESRRA",7
GO:0032481,"GO:0032481","positive regulation of type I interferon production","7/649","68/11852",0.0775715975679932,0.0775715975679932,0.612106477079988,"DHX33/POLR3B/POLR3E/CRCP/POLR3K/POLR3D/POLR1C",7
GO:0031102,"GO:0031102","neuron projection regeneration","5/649","42/11852",0.0777356743401198,0.0777356743401198,0.612106477079988,"TNC/ADM/NDEL1/JUN/TSPO",5
GO:0055008,"GO:0055008","cardiac muscle tissue morphogenesis","5/649","42/11852",0.0777356743401198,0.0777356743401198,0.612106477079988,"PKP2/MED1/TPM1/ANKRD1/CHD7",5
GO:1900024,"GO:1900024","regulation of substrate adhesion-dependent cell spreading","5/649","42/11852",0.0777356743401198,0.0777356743401198,0.612106477079988,"ARHGEF7/C1QBP/CORO1C/ACTN4/FLNA",5
GO:0042440,"GO:0042440","pigment metabolic process","6/649","55/11852",0.0789135404963651,0.0789135404963651,0.613456518024632,"MTHFD1/MTHFD1L/SLC25A38/GART/TSPO/PRPS1",6
GO:0072413,"GO:0072413","signal transduction involved in mitotic cell cycle checkpoint","6/649","55/11852",0.0789135404963651,0.0789135404963651,0.613456518024632,"E2F1/CNOT1/PLK2/TFDP1/E2F4/PRMT1",6
GO:1902402,"GO:1902402","signal transduction involved in mitotic DNA damage checkpoint","6/649","55/11852",0.0789135404963651,0.0789135404963651,0.613456518024632,"E2F1/CNOT1/PLK2/TFDP1/E2F4/PRMT1",6
GO:1902403,"GO:1902403","signal transduction involved in mitotic DNA integrity checkpoint","6/649","55/11852",0.0789135404963651,0.0789135404963651,0.613456518024632,"E2F1/CNOT1/PLK2/TFDP1/E2F4/PRMT1",6
GO:0007566,"GO:0007566","embryo implantation","4/649","30/11852",0.079026940408718,0.079026940408718,0.613456518024632,"C1QBP/POLR1B/RPL29/IGFBP7",4
GO:0034080,"GO:0034080","CENP-A containing nucleosome assembly","4/649","30/11852",0.079026940408718,0.079026940408718,0.613456518024632,"NASP/CENPO/RUVBL1/POLE3",4
GO:0061641,"GO:0061641","CENP-A containing chromatin organization","4/649","30/11852",0.079026940408718,0.079026940408718,0.613456518024632,"NASP/CENPO/RUVBL1/POLE3",4
GO:2000134,"GO:2000134","negative regulation of G1/S transition of mitotic cell cycle","9/649","96/11852",0.0794942346473799,0.0794942346473799,0.613989606995147,"E2F1/CNOT1/RIPK1/PLK2/BRD7/TFDP1/E2F4/RPA2/PRMT1",9
GO:0071214,"GO:0071214","cellular response to abiotic stimulus","19/649","245/11852",0.0795759519469554,0.0795759519469554,0.613989606995147,"HSPA5/CNN2/POLD3/TNFRSF10B/ATF4/EIF2S1/MMP7/INTS7/SDE2/ANKRD1/CDC25A/METTL3/LETM1/E2F4/HYAL2/TSPO/ACTR5/EEF1D/POLE3",19
GO:0104004,"GO:0104004","cellular response to environmental stimulus","19/649","245/11852",0.0795759519469554,0.0795759519469554,0.613989606995147,"HSPA5/CNN2/POLD3/TNFRSF10B/ATF4/EIF2S1/MMP7/INTS7/SDE2/ANKRD1/CDC25A/METTL3/LETM1/E2F4/HYAL2/TSPO/ACTR5/EEF1D/POLE3",19
GO:0006907,"GO:0006907","pinocytosis","3/649","19/11852",0.082437628874782,0.082437628874782,0.629333174263719,"EHD4/ACTN4/ANKFY1",3
GO:0042451,"GO:0042451","purine nucleoside biosynthetic process","3/649","19/11852",0.082437628874782,0.082437628874782,0.629333174263719,"IMPDH2/NME1/GUK1",3
GO:0046129,"GO:0046129","purine ribonucleoside biosynthetic process","3/649","19/11852",0.082437628874782,0.082437628874782,0.629333174263719,"IMPDH2/NME1/GUK1",3
GO:1903427,"GO:1903427","negative regulation of reactive oxygen species biosynthetic process","3/649","19/11852",0.082437628874782,0.082437628874782,0.629333174263719,"KHSRP/TSPO/TRAP1",3
GO:1903579,"GO:1903579","negative regulation of ATP metabolic process","3/649","19/11852",0.082437628874782,0.082437628874782,0.629333174263719,"TIGAR/PPIF/TSPO",3
GO:0071236,"GO:0071236","cellular response to antibiotic","10/649","111/11852",0.0825492334125495,0.0825492334125495,0.629333174263719,"HSPA5/APEX1/PPIF/RIPK1/GNAI1/RPL23/TRAP1/RPS3/PYCR1/RACK1",10
GO:0035195,"GO:0035195","gene silencing by miRNA","13/649","155/11852",0.082857919637007,0.082857919637007,0.630433168833786,"NUP160/NUP50/DDX5/NUP98/XPO5/NUP153/CNOT1/ZFP36/AJUBA/RIPK1/METTL3/SPOUT1/EIF6",13
GO:1900180,"GO:1900180","regulation of protein localization to nucleus","9/649","97/11852",0.0836102483275711,0.0836102483275711,0.633157822678457,"POLR1A/ZPR1/BYSL/DKC1/NOLC1/FLNA/PINX1/HYAL2/CCT6A",9
GO:0007080,"GO:0007080","mitotic metaphase plate congression","5/649","43/11852",0.0842066881931683,0.0842066881931683,0.633157822678457,"CHMP4B/KPNB1/CDCA5/RRS1/PINX1",5
GO:0042398,"GO:0042398","cellular modified amino acid biosynthetic process","5/649","43/11852",0.0842066881931683,0.0842066881931683,0.633157822678457,"CHDH/MTHFD1/MTHFD1L/GART/CHAC1",5
GO:0042446,"GO:0042446","hormone biosynthetic process","5/649","43/11852",0.0842066881931683,0.0842066881931683,0.633157822678457,"SCARB1/MED1/ADM/DHCR7/TSPO",5
GO:0070265,"GO:0070265","necrotic cell death","5/649","43/11852",0.0842066881931683,0.0842066881931683,0.633157822678457,"PPIF/TRAF2/RIPK1/TSPO/PGAM5",5
GO:1902041,"GO:1902041","regulation of extrinsic apoptotic signaling pathway via death domain receptors","5/649","43/11852",0.0842066881931683,0.0842066881931683,0.633157822678457,"TNFRSF10B/TRAF2/RIPK1/THBS1/PEA15",5
GO:0006694,"GO:0006694","steroid biosynthetic process","11/649","126/11852",0.0844991240589242,0.0844991240589242,0.634113315370606,"NFYA/SCARB1/KPNB1/MED1/ADM/SF1/DHCR7/TSPO/ACLY/PMVK/IGFBP7",11
GO:0042594,"GO:0042594","response to starvation","13/649","156/11852",0.0861209734684076,0.0861209734684076,0.645022011400923,"HSPA5/CAD/XBP1/DHODH/ZFP36/ATF4/MYBBP1A/EIF2S1/ADM/DDIT3/JUN/EIF4EBP1/WDR45B",13
GO:0050779,"GO:0050779","RNA destabilization","4/649","31/11852",0.0869959582306293,0.0869959582306293,0.649040089768958,"KHSRP/ZFP36/METTL3/HNRNPR",4
GO:0055010,"GO:0055010","ventricular cardiac muscle tissue morphogenesis","4/649","31/11852",0.0869959582306293,0.0869959582306293,0.649040089768958,"PKP2/MED1/TPM1/CHD7",4
GO:0036473,"GO:0036473","cell death in response to oxidative stress","7/649","70/11852",0.0875560057739359,0.0875560057739359,0.65194998269688,"ATF4/RIPK1/FBXW7/TRAP1/ZNF622/PYCR1/RACK1",7
GO:1902807,"GO:1902807","negative regulation of cell cycle G1/S phase transition","9/649","98/11852",0.0878520012793311,0.0878520012793311,0.652886251857616,"E2F1/CNOT1/RIPK1/PLK2/BRD7/TFDP1/E2F4/RPA2/PRMT1",9
GO:0019218,"GO:0019218","regulation of steroid metabolic process","8/649","84/11852",0.0883869837285047,0.0883869837285047,0.655591533590436,"NFYA/KPNB1/ADM/SF1/DHCR7/TSPO/PMVK/IGFBP7",8
GO:0009615,"GO:0009615","response to virus","18/649","233/11852",0.0885813776097413,0.0885813776097413,0.655765004333037,"POLR3B/POLR3E/C1QBP/ILF3/HMGA1/DDX21/FOSL1/IFITM2/FLNA/ERCC6/CRCP/HYAL2/EXOSC5/ODC1/RPS15A/POLR3K/POLR3D/EXOSC4",18
GO:0051607,"GO:0051607","defense response to virus","14/649","172/11852",0.0893212614535613,0.0893212614535613,0.659749697599379,"POLR3B/POLR3E/C1QBP/ILF3/DDX21/IFITM2/FLNA/ERCC6/CRCP/HYAL2/EXOSC5/POLR3K/POLR3D/EXOSC4",14
GO:0007093,"GO:0007093","mitotic cell cycle checkpoint","13/649","157/11852",0.0894637251205307,0.0894637251205307,0.659749697599379,"ZNF207/ORC1/CLSPN/E2F1/RPL24/CNOT1/PLK2/TFDP1/E2F4/RPA2/PRMT1/RPS6/SETMAR",13
GO:0046794,"GO:0046794","transport of virus","6/649","57/11852",0.090326952294874,0.090326952294874,0.664837028407366,"NUP160/NUP50/KPNB1/NUP98/NUP153/UBA52",6
GO:0071356,"GO:0071356","cellular response to tumor necrosis factor","16/649","203/11852",0.090996707814501,0.090996707814501,0.66848357847999,"PSME4/TRAF2/ZFP36/ACTN4/RIPK1/THBS1/ANKRD1/KRT8/TNFRSF12A/HYAL2/KRT18/PSMA5/RPS3/RACK1/TMSB4X/CEBPA",16
GO:0016925,"GO:0016925","protein sumoylation","7/649","71/11852",0.0928089005042596,0.0928089005042596,0.674398399217035,"NUP160/NUP50/UBE2I/NUP98/NUP153/GNL3/UBA2",7
GO:0043506,"GO:0043506","regulation of JUN kinase activity","7/649","71/11852",0.0928089005042596,0.0928089005042596,0.674398399217035,"MAP3K4/DNAJA1/TRAF2/RIPK1/DVL3/ERCC6/RPS3",7
GO:0006986,"GO:0006986","response to unfolded protein","13/649","158/11852",0.0928862876726205,0.0928862876726205,0.674398399217035,"HSPA5/DNAJA1/PPP1R15A/XBP1/HSPA9/ATF4/EIF2S1/THBS1/MANF/DDIT3/CHAC1/SRPRB/RACK1",13
GO:0002097,"GO:0002097","tRNA wobble base modification","3/649","20/11852",0.0932087823238477,0.0932087823238477,0.674398399217035,"TRMU/ELP5/CTU2",3
GO:0006541,"GO:0006541","glutamine metabolic process","3/649","20/11852",0.0932087823238477,0.0932087823238477,0.674398399217035,"CAD/CTPS1/PHGDH",3
GO:0010259,"GO:0010259","multicellular organism aging","3/649","20/11852",0.0932087823238477,0.0932087823238477,0.674398399217035,"RAD54L/MSH6/HYAL2",3
GO:0045980,"GO:0045980","negative regulation of nucleotide metabolic process","3/649","20/11852",0.0932087823238477,0.0932087823238477,0.674398399217035,"TIGAR/PPIF/TSPO",3
GO:1900543,"GO:1900543","negative regulation of purine nucleotide metabolic process","3/649","20/11852",0.0932087823238477,0.0932087823238477,0.674398399217035,"TIGAR/PPIF/TSPO",3
GO:0051053,"GO:0051053","negative regulation of DNA metabolic process","10/649","114/11852",0.0945877063042261,0.0945877063042261,0.674796471925971,"LIG3/DNAJC2/GTPBP4/MSH6/NAT10/ANKRD1/PINX1/FBXW7/AUNIP/RPS3",10
GO:0000289,"GO:0000289","nuclear-transcribed mRNA poly(A) tail shortening","4/649","32/11852",0.0953373906647601,0.0953373906647601,0.674796471925971,"SAMD4A/CNOT1/ZFP36/NOCT",4
GO:0002763,"GO:0002763","positive regulation of myeloid leukocyte differentiation","4/649","32/11852",0.0953373906647601,0.0953373906647601,0.674796471925971,"ACIN1/RIPK1/JUN/CA2",4
GO:0006734,"GO:0006734","NADH metabolic process","4/649","32/11852",0.0953373906647601,0.0953373906647601,0.674796471925971,"PKM/TIGAR/ALDOA/HK2",4
GO:0031055,"GO:0031055","chromatin remodeling at centromere","4/649","32/11852",0.0953373906647601,0.0953373906647601,0.674796471925971,"NASP/CENPO/RUVBL1/POLE3",4
GO:0051084,"GO:0051084","'de novo' posttranslational protein folding","4/649","32/11852",0.0953373906647601,0.0953373906647601,0.674796471925971,"HSPA5/HSPA9/DNAJC7/CHCHD4",4
GO:0002573,"GO:0002573","myeloid leukocyte differentiation","11/649","129/11852",0.0958996337324062,0.0958996337324062,0.674796471925971,"MYH9/ACIN1/MED1/RIPK1/JUN/NME1/FARP2/CA2/FBXW7/ESRRA/CEBPA",11
GO:1902850,"GO:1902850","microtubule cytoskeleton organization involved in mitosis","11/649","129/11852",0.0958996337324062,0.0958996337324062,0.674796471925971,"ZNF207/CHMP4B/BCCIP/KPNB1/PLK2/NDEL1/RCC1/FLNA/GNAI1/WRAP73/DRG1",11
GO:1904356,"GO:1904356","regulation of telomere maintenance via telomere lengthening","6/649","58/11852",0.096352173315999,0.096352173315999,0.674796471925971,"MAP3K4/SMG7/DKC1/NAT10/PINX1/CCT6A",6
GO:0007050,"GO:0007050","cell cycle arrest","16/649","205/11852",0.0970982684795977,0.0970982684795977,0.674796471925971,"PPP1R15A/CCNK/E2F1/PPM1G/CNOT1/MYBBP1A/THBS1/SDE2/PLK2/DDIT3/TFDP1/E2F4/RPL23/PRMT1/TBRG4/SETMAR",16
GO:0048872,"GO:0048872","homeostasis of number of cells","15/649","190/11852",0.0983232720832853,0.0983232720832853,0.674796471925971,"NLE1/ACIN1/DNAJA3/HSPA9/MED1/ZFP36/RPS24/SLC25A38/LYAR/ZBTB7A/RRN3/RPS19/PRMT1/RPS6/RPS14",15
GO:0032984,"GO:0032984","protein-containing complex disassembly","22/649","300/11852",0.0996310813206811,0.0996310813206811,0.674796471925971,"WDR1/JMJD4/SUPT16H/GRWD1/MRPL32/ETF1/MRPS26/HMGA1/MRRF/EPG5/MRPL17/DVL3/SMARCD2/MRPL27/RPL23/MRPS12/MRPS25/EIF5A/MRPS9/MRPL14/MRPL20/MRPS21",22
GO:0051052,"GO:0051052","regulation of DNA metabolic process","25/649","348/11852",0.0997144653716131,0.0997144653716131,0.674796471925971,"LIG3/TIGAR/MAP3K4/PRMT5/DNAJC2/GTPBP4/SUPT6H/MSH6/SMG7/DKC1/NAT10/ANKRD1/GNL3/OTUD4/JUN/TFDP1/ERCC6/PINX1/MBD3/FBXW7/RPA2/AUNIP/CCT6A/RPS3/SETMAR",25
GO:0071241,"GO:0071241","cellular response to inorganic substance","12/649","145/11852",0.100213877703106,0.100213877703106,0.674796471925971,"HSPA5/WNK1/TIGAR/PPIF/TRAF2/ATF4/EIF2S1/JUN/MT1E/TSPO/EIF4A3/CEBPA",12
GO:0001731,"GO:0001731","formation of translation preinitiation complex","2/649","10/11852",0.100654516290028,0.100654516290028,0.674796471925971,"EIF4H/RPL13A",2
GO:0006620,"GO:0006620","posttranslational protein targeting to endoplasmic reticulum membrane","2/649","10/11852",0.100654516290028,0.100654516290028,0.674796471925971,"HSPA5/CHMP4B",2
GO:0006857,"GO:0006857","oligopeptide transport","2/649","10/11852",0.100654516290028,0.100654516290028,0.674796471925971,"CDH17/CA2",2
GO:0007256,"GO:0007256","activation of JNKK activity","2/649","10/11852",0.100654516290028,0.100654516290028,0.674796471925971,"RIPK1/ERCC6",2
GO:0010763,"GO:0010763","positive regulation of fibroblast migration","2/649","10/11852",0.100654516290028,0.100654516290028,0.674796471925971,"ARHGEF7/THBS1",2
GO:0010832,"GO:0010832","negative regulation of myotube differentiation","2/649","10/11852",0.100654516290028,0.100654516290028,0.674796471925971,"XBP1/BDNF",2
GO:0018202,"GO:0018202","peptidyl-histidine modification","2/649","10/11852",0.100654516290028,0.100654516290028,0.674796471925971,"DPH2/DPH7",2
GO:0031000,"GO:0031000","response to caffeine","2/649","10/11852",0.100654516290028,0.100654516290028,0.674796471925971,"CAD/DHODH",2
GO:0031507,"GO:0031507","heterochromatin assembly","2/649","10/11852",0.100654516290028,0.100654516290028,0.674796471925971,"HMGA1/POLE3",2
GO:0032875,"GO:0032875","regulation of DNA endoreduplication","2/649","10/11852",0.100654516290028,0.100654516290028,0.674796471925971,"MSH6/FBXW7",2
GO:0033235,"GO:0033235","positive regulation of protein sumoylation","2/649","10/11852",0.100654516290028,0.100654516290028,0.674796471925971,"UBE2I/GNL3",2
GO:0033314,"GO:0033314","mitotic DNA replication checkpoint","2/649","10/11852",0.100654516290028,0.100654516290028,0.674796471925971,"ORC1/CLSPN",2
GO:0033623,"GO:0033623","regulation of integrin activation","2/649","10/11852",0.100654516290028,0.100654516290028,0.674796471925971,"CDH17/FARP2",2
GO:0034969,"GO:0034969","histone arginine methylation","2/649","10/11852",0.100654516290028,0.100654516290028,0.674796471925971,"PRMT5/PRMT1",2
GO:0035246,"GO:0035246","peptidyl-arginine N-methylation","2/649","10/11852",0.100654516290028,0.100654516290028,0.674796471925971,"PRMT5/PRMT1",2
GO:0035461,"GO:0035461","vitamin transmembrane transport","2/649","10/11852",0.100654516290028,0.100654516290028,0.674796471925971,"SCARB1/SLC25A19",2
GO:0036270,"GO:0036270","response to diuretic","2/649","10/11852",0.100654516290028,0.100654516290028,0.674796471925971,"CAD/DHODH",2
GO:0045945,"GO:0045945","positive regulation of transcription by RNA polymerase III","2/649","10/11852",0.100654516290028,0.100654516290028,0.674796471925971,"ELL/CEBPA",2
GO:0048548,"GO:0048548","regulation of pinocytosis","2/649","10/11852",0.100654516290028,0.100654516290028,0.674796471925971,"ACTN4/ANKFY1",2
GO:0051409,"GO:0051409","response to nitrosative stress","2/649","10/11852",0.100654516290028,0.100654516290028,0.674796471925971,"DNAJA1/DDIT3",2
GO:0060263,"GO:0060263","regulation of respiratory burst","2/649","10/11852",0.100654516290028,0.100654516290028,0.674796471925971,"NOXO1/RPS19",2
GO:0090148,"GO:0090148","membrane fission","2/649","10/11852",0.100654516290028,0.100654516290028,0.674796471925971,"CHMP4B/CORO1C",2
GO:1902043,"GO:1902043","positive regulation of extrinsic apoptotic signaling pathway via death domain receptors","2/649","10/11852",0.100654516290028,0.100654516290028,0.674796471925971,"THBS1/PEA15",2
GO:1902946,"GO:1902946","protein localization to early endosome","2/649","10/11852",0.100654516290028,0.100654516290028,0.674796471925971,"EZR/MSN",2
GO:1903405,"GO:1903405","protein localization to nuclear body","2/649","10/11852",0.100654516290028,0.100654516290028,0.674796471925971,"DKC1/CCT6A",2
GO:1903897,"GO:1903897","regulation of PERK-mediated unfolded protein response","2/649","10/11852",0.100654516290028,0.100654516290028,0.674796471925971,"HSPA5/PPP1R15A",2
GO:1904851,"GO:1904851","positive regulation of establishment of protein localization to telomere","2/649","10/11852",0.100654516290028,0.100654516290028,0.674796471925971,"DKC1/CCT6A",2
GO:1904867,"GO:1904867","protein localization to Cajal body","2/649","10/11852",0.100654516290028,0.100654516290028,0.674796471925971,"DKC1/CCT6A",2
GO:0051188,"GO:0051188","cofactor biosynthetic process","20/649","269/11852",0.10153333658974,0.10153333658974,0.679500220807245,"NUP160/PKM/TIGAR/NUP50/MTHFD1/OGDH/NUP98/MTHFD1L/UBIAD1/NUP153/SLC25A38/ALDOA/GART/HK2/ZBTB7A/TSPO/CHAC1/ACLY/RSAD1/EIF6",20
GO:0046677,"GO:0046677","response to antibiotic","17/649","222/11852",0.101745134964966,0.101745134964966,0.679731389468863,"TNC/HSPA5/APEX1/PPIF/RIPK1/SETD7/FOSL1/JUN/EIF4EBP1/GNAI1/HYAL2/RPL23/TRAP1/RPS3/PYCR1/RPL10A/RACK1",17
GO:0045930,"GO:0045930","negative regulation of mitotic cell cycle","21/649","285/11852",0.101988567377058,0.101988567377058,0.680172724859722,"ZNF207/CUL1/PSME4/NLE1/ORC1/CLSPN/E2F1/TRIM35/RPL24/CNOT1/RIPK1/PLK2/BRD7/TFDP1/E2F4/PINX1/RPA2/PRMT1/RPS6/PSMA5/SETMAR",21
GO:0045639,"GO:0045639","positive regulation of myeloid cell differentiation","6/649","59/11852",0.10258633122997,0.10258633122997,0.681665613218451,"ACIN1/MED1/RIPK1/JUN/CA2/PRMT1",6
GO:0030808,"GO:0030808","regulation of nucleotide biosynthetic process","8/649","87/11852",0.10314989220034,0.10314989220034,0.681665613218451,"NUP160/TIGAR/NUP50/NUP98/NUP153/ZBTB7A/TMSB4X/EIF6",8
GO:1900371,"GO:1900371","regulation of purine nucleotide biosynthetic process","8/649","87/11852",0.10314989220034,0.10314989220034,0.681665613218451,"NUP160/TIGAR/NUP50/NUP98/NUP153/ZBTB7A/TMSB4X/EIF6",8
GO:1903321,"GO:1903321","negative regulation of protein modification by small protein conjugation or removal","7/649","73/11852",0.103829749320127,0.103829749320127,0.681665613218451,"DNAJA1/GTPBP4/PINX1/TSPO/RPL23/RPS3/RPS7",7
GO:1904019,"GO:1904019","epithelial cell apoptotic process","7/649","73/11852",0.103829749320127,0.103829749320127,0.681665613218451,"E2F1/ZFP36/EIF2S1/THBS1/KRT8/KRT18/TNIP2",7
GO:0002931,"GO:0002931","response to ischemia","4/649","33/11852",0.104039462659757,0.104039462659757,0.681665613218451,"TIGAR/PPIF/HK2/EIF4EBP1",4
GO:0017004,"GO:0017004","cytochrome complex assembly","4/649","33/11852",0.104039462659757,0.104039462659757,0.681665613218451,"HCCS/TIMM21/UQCRB/UQCC3",4
GO:0043928,"GO:0043928","exonucleolytic nuclear-transcribed mRNA catabolic process involved in deadenylation-dependent decay","4/649","33/11852",0.104039462659757,0.104039462659757,0.681665613218451,"EXOSC7/EXOSC5/EXOSC2/EXOSC4",4
GO:0006359,"GO:0006359","regulation of transcription by RNA polymerase III","3/649","21/11852",0.104523308137202,0.104523308137202,0.681665613218451,"ELL/NAB2/CEBPA",3
GO:0006735,"GO:0006735","NADH regeneration","3/649","21/11852",0.104523308137202,0.104523308137202,0.681665613218451,"PKM/ALDOA/HK2",3
GO:0061621,"GO:0061621","canonical glycolysis","3/649","21/11852",0.104523308137202,0.104523308137202,0.681665613218451,"PKM/ALDOA/HK2",3
GO:0061718,"GO:0061718","glucose catabolic process to pyruvate","3/649","21/11852",0.104523308137202,0.104523308137202,0.681665613218451,"PKM/ALDOA/HK2",3
GO:2001024,"GO:2001024","negative regulation of response to drug","3/649","21/11852",0.104523308137202,0.104523308137202,0.681665613218451,"TRAP1/PYCR1/RACK1",3
GO:0003208,"GO:0003208","cardiac ventricle morphogenesis","5/649","46/11852",0.10524773870653,0.10524773870653,0.684063357908811,"PKP2/SEMA3C/MED1/TPM1/CHD7",5
GO:0045292,"GO:0045292","mRNA cis splicing, via spliceosome","5/649","46/11852",0.10524773870653,0.10524773870653,0.684063357908811,"SRSF7/SRSF4/RBM19/SART1/SRSF2",5
GO:0009314,"GO:0009314","response to radiation","24/649","335/11852",0.107413371370749,0.107413371370749,0.69695772001717,"HSPA5/POLD3/TIGAR/MAP3K4/RAD54L/MSH6/ATF4/EIF2S1/INTS7/SDE2/CCAR2/CDC25A/METTL3/JUN/XRCC2/E2F4/ERCC6/HYAL2/ACTR5/EEF1D/POLE3/RDH13/FEN1/AEN",24
GO:0050821,"GO:0050821","protein stabilization","12/649","147/11852",0.108035919552893,0.108035919552893,0.699551298007692,"ZNF207/USP36/GTPBP4/SEC16A/DVL3/FLNA/TELO2/FBXW7/RPL23/CCT6A/TNIP2/RPS7",12
GO:2000377,"GO:2000377","regulation of reactive oxygen species metabolic process","11/649","132/11852",0.108177936791829,0.108177936791829,0.699551298007692,"TIGAR/KHSRP/RIPK1/THBS1/DDAH1/HK2/AATF/NOXO1/TSPO/TRAP1/EIF6",11
GO:0051591,"GO:0051591","response to cAMP","6/649","60/11852",0.109026342384901,0.109026342384901,0.703850727110039,"HSPA5/EZR/APEX1/FOSL1/JUN/NME1",6
GO:0048525,"GO:0048525","negative regulation of viral process","7/649","74/11852",0.109594308164644,0.109594308164644,0.706328287737811,"CCNK/TRIM35/ZFP36/ILF3/JUN/IFITM2/TRIM27",7
GO:0007006,"GO:0007006","mitochondrial membrane organization","9/649","103/11852",0.110934999589436,0.110934999589436,0.713769345645206,"PPP1R13B/E2F1/TIMM50/PPIF/HK2/LETM1/TFDP1/TIMM13/UQCC3",9
GO:0035194,"GO:0035194","posttranscriptional gene silencing by RNA","13/649","163/11852",0.111196057629909,0.111196057629909,0.714250617906651,"NUP160/NUP50/DDX5/NUP98/XPO5/NUP153/CNOT1/ZFP36/AJUBA/RIPK1/METTL3/SPOUT1/EIF6",13
GO:0010332,"GO:0010332","response to gamma radiation","5/649","47/11852",0.112786079211723,0.112786079211723,0.720954666131316,"HSPA5/TIGAR/XRCC2/ERCC6/POLE3",5
GO:0030520,"GO:0030520","intracellular estrogen receptor signaling pathway","5/649","47/11852",0.112786079211723,0.112786079211723,0.720954666131316,"DDX5/CNOT1/MED1/SAFB/RBM14",5
GO:0038066,"GO:0038066","p38MAPK cascade","4/649","34/11852",0.113089352474404,0.113089352474404,0.720954666131316,"MAP3K4/EZR/ZFP36/PRMT1",4
GO:0010948,"GO:0010948","negative regulation of cell cycle process","22/649","305/11852",0.113179789613094,0.113179789613094,0.720954666131316,"ZNF207/CUL1/PSME4/ORC1/CCNK/CLSPN/E2F1/MSH6/CNOT1/RIPK1/PLK2/BRD7/TFDP1/E2F4/RBM14/PINX1/FBXW7/RPA2/RPL23/PRMT1/PSMA5/SETMAR",22
GO:0051098,"GO:0051098","regulation of binding","22/649","305/11852",0.113179789613094,0.113179789613094,0.720954666131316,"PLAUR/HSPA5/EIF3D/E2F1/ARHGEF7/GTPBP4/SYMPK/TRAF2/EIF2S1/PLK2/CDCA5/DDIT3/BDNF/JUN/ZBTB7A/NME1/PINX1/EDF1/FBXW7/EIF4A3/ZNF593/TMSB4X",22
GO:0016441,"GO:0016441","posttranscriptional gene silencing","13/649","164/11852",0.115096524816483,0.115096524816483,0.723756104046305,"NUP160/NUP50/DDX5/NUP98/XPO5/NUP153/CNOT1/ZFP36/AJUBA/RIPK1/METTL3/SPOUT1/EIF6",13
GO:0046434,"GO:0046434","organophosphate catabolic process","15/649","195/11852",0.115511459481592,0.115511459481592,0.723756104046305,"NUP160/PKM/SCARB1/UNG/TIGAR/NUP50/OGDH/NUP98/NUP153/ALDOA/HK2/ZBTB7A/PNP/DCTPP1/EIF6",15
GO:0043507,"GO:0043507","positive regulation of JUN kinase activity","6/649","61/11852",0.115668720980528,0.115668720980528,0.723756104046305,"MAP3K4/TRAF2/RIPK1/DVL3/ERCC6/RPS3",6
GO:0006163,"GO:0006163","purine nucleotide metabolic process","30/649","436/11852",0.115894620917194,0.115894620917194,0.723756104046305,"AK2/NUP160/PKM/TIGAR/NUP50/MTHFD1/OGDH/PPIF/NUP98/NUP153/ALDOA/GART/HK2/IMPDH2/ZBTB7A/PNP/NME1/AFG1L/UQCRB/TSPO/ACLY/GUK1/NDUFB11/PRPS1/ATP6V1B2/NDUFB9/PMVK/UQCC3/TMSB4X/EIF6",30
GO:0008637,"GO:0008637","apoptotic mitochondrial changes","9/649","104/11852",0.115921956153423,0.115921956153423,0.723756104046305,"PLAUR/PPP1R13B/E2F1/TIMM50/PPIF/CCAR2/HK2/JUN/TFDP1",9
GO:0016578,"GO:0016578","histone deubiquitination","3/649","22/11852",0.116346005847809,0.116346005847809,0.723756104046305,"USP36/SART3/EPOP",3
GO:0032897,"GO:0032897","negative regulation of viral transcription","3/649","22/11852",0.116346005847809,0.116346005847809,0.723756104046305,"ZFP36/JUN/TRIM27",3
GO:0036003,"GO:0036003","positive regulation of transcription from RNA polymerase II promoter in response to stress","3/649","22/11852",0.116346005847809,0.116346005847809,0.723756104046305,"HSPA5/ATF4/DDIT3",3
GO:0061615,"GO:0061615","glycolytic process through fructose-6-phosphate","3/649","22/11852",0.116346005847809,0.116346005847809,0.723756104046305,"PKM/ALDOA/HK2",3
GO:0061620,"GO:0061620","glycolytic process through glucose-6-phosphate","3/649","22/11852",0.116346005847809,0.116346005847809,0.723756104046305,"PKM/ALDOA/HK2",3
GO:1903203,"GO:1903203","regulation of oxidative stress-induced neuron death","3/649","22/11852",0.116346005847809,0.116346005847809,0.723756104046305,"ATF4/FBXW7/RACK1",3
GO:0042770,"GO:0042770","signal transduction in response to DNA damage","10/649","119/11852",0.116838737441694,0.116838737441694,0.723756104046305,"E2F1/USP10/DDX5/CNOT1/PLK2/ANKRD1/TFDP1/E2F4/PRMT1/PTTG1IP",10
GO:1901991,"GO:1901991","negative regulation of mitotic cell cycle phase transition","16/649","211/11852",0.116904573256812,0.116904573256812,0.723756104046305,"ZNF207/CUL1/PSME4/ORC1/CLSPN/E2F1/CNOT1/RIPK1/PLK2/BRD7/TFDP1/E2F4/PINX1/RPA2/PRMT1/PSMA5",16
GO:0035966,"GO:0035966","response to topologically incorrect protein","14/649","180/11852",0.117409433039641,0.117409433039641,0.723756104046305,"HSPA5/DNAJA1/PPP1R15A/XBP1/HSPA9/ATF4/EIF2S1/THBS1/MANF/DDIT3/SDF2L1/CHAC1/SRPRB/RACK1",14
GO:0008298,"GO:0008298","intracellular mRNA localization","2/649","11/11852",0.118715470758405,0.118715470758405,0.723756104046305,"ZFP36/EXOSC2",2
GO:0008340,"GO:0008340","determination of adult lifespan","2/649","11/11852",0.118715470758405,0.118715470758405,0.723756104046305,"RAD54L/MSH6",2
GO:0010829,"GO:0010829","negative regulation of glucose transmembrane transport","2/649","11/11852",0.118715470758405,0.118715470758405,0.723756104046305,"PEA15/FABP5",2
GO:0035330,"GO:0035330","regulation of hippo signaling","2/649","11/11852",0.118715470758405,0.118715470758405,0.723756104046305,"WWC1/AJUBA",2
GO:0043650,"GO:0043650","dicarboxylic acid biosynthetic process","2/649","11/11852",0.118715470758405,0.118715470758405,0.723756104046305,"MTHFD1/MTHFD1L",2
GO:0048265,"GO:0048265","response to pain","2/649","11/11852",0.118715470758405,0.118715470758405,0.723756104046305,"THBS1/TSPO",2
GO:0070203,"GO:0070203","regulation of establishment of protein localization to telomere","2/649","11/11852",0.118715470758405,0.118715470758405,0.723756104046305,"DKC1/CCT6A",2
GO:0070914,"GO:0070914","UV-damage excision repair","2/649","11/11852",0.118715470758405,0.118715470758405,0.723756104046305,"POLD3/ACTR5",2
GO:0097501,"GO:0097501","stress response to metal ion","2/649","11/11852",0.118715470758405,0.118715470758405,0.723756104046305,"HSPA5/MT1E",2
GO:1900025,"GO:1900025","negative regulation of substrate adhesion-dependent cell spreading","2/649","11/11852",0.118715470758405,0.118715470758405,0.723756104046305,"CORO1C/ACTN4",2
GO:1903651,"GO:1903651","positive regulation of cytoplasmic transport","2/649","11/11852",0.118715470758405,0.118715470758405,0.723756104046305,"EZR/MSN",2
GO:1905214,"GO:1905214","regulation of RNA binding","2/649","11/11852",0.118715470758405,0.118715470758405,0.723756104046305,"EIF3D/EIF4A3",2
GO:1905668,"GO:1905668","positive regulation of protein localization to endosome","2/649","11/11852",0.118715470758405,0.118715470758405,0.723756104046305,"EZR/MSN",2
GO:0014074,"GO:0014074","response to purine-containing compound","8/649","90/11852",0.119199460491518,0.119199460491518,0.725553274136343,"HSPA5/CAD/EZR/APEX1/DHODH/FOSL1/JUN/NME1",8
GO:0007623,"GO:0007623","circadian rhythm","12/649","150/11852",0.120422222677199,0.120422222677199,0.729302624948809,"THRAP3/HUWE1/PRMT5/ATF4/MYBBP1A/NOCT/CCAR2/METTL3/JUN/IMPDH2/HNRNPR/FBXW7",12
GO:0043123,"GO:0043123","positive regulation of I-kappaB kinase/NF-kappaB signaling","12/649","150/11852",0.120422222677199,0.120422222677199,0.729302624948809,"UBE2I/TNFRSF10B/TRAF2/AJUBA/RIPK1/PLK2/DDX21/FLNA/EEF1D/TNIP2/S100A4/TFG",12
GO:0060415,"GO:0060415","muscle tissue morphogenesis","5/649","48/11852",0.120576165524751,0.120576165524751,0.729302624948809,"PKP2/MED1/TPM1/ANKRD1/CHD7",5
GO:0061515,"GO:0061515","myeloid cell development","5/649","48/11852",0.120576165524751,0.120576165524751,0.729302624948809,"MED1/LYAR/ZBTB7A/FBXW7/RPS6",5
GO:0042147,"GO:0042147","retrograde transport, endosome to Golgi","7/649","76/11852",0.121621131949775,0.121621131949775,0.73215861140714,"YKT6/TBC1D14/UBE2O/BET1L/ANKFY1/TRIM27/SNX8",7
GO:0051196,"GO:0051196","regulation of coenzyme metabolic process","7/649","76/11852",0.121621131949775,0.121621131949775,0.73215861140714,"NUP160/TIGAR/NUP50/NUP98/NUP153/ZBTB7A/EIF6",7
GO:1905897,"GO:1905897","regulation of response to endoplasmic reticulum stress","7/649","76/11852",0.121621131949775,0.121621131949775,0.73215861140714,"HSPA5/PPP1R15A/XBP1/MANF/DDIT3/UBE2G2/RACK1",7
GO:0000291,"GO:0000291","nuclear-transcribed mRNA catabolic process, exonucleolytic","4/649","35/11852",0.122473316363735,0.122473316363735,0.732904941053122,"EXOSC7/EXOSC5/EXOSC2/EXOSC4",4
GO:0048701,"GO:0048701","embryonic cranial skeleton morphogenesis","4/649","35/11852",0.122473316363735,0.122473316363735,0.732904941053122,"MTHFD1/MTHFD1L/IRX5/EIF4A3",4
GO:0070268,"GO:0070268","cornification","4/649","35/11852",0.122473316363735,0.122473316363735,0.732904941053122,"PKP2/PCSK6/KRT8/KRT18",4
GO:1900407,"GO:1900407","regulation of cellular response to oxidative stress","6/649","62/11852",0.122509597544413,0.122509597544413,0.732904941053122,"ATF4/RIPK1/FBXW7/TRAP1/PYCR1/RACK1",6
GO:0046718,"GO:0046718","viral entry into host cell","8/649","91/11852",0.124828712315792,0.124828712315792,0.745615673006115,"PVR/SCARB1/SLC1A5/NUP153/IFITM2/SCARB2/HYAL2/SLC20A2",8
GO:0051100,"GO:0051100","negative regulation of binding","11/649","136/11852",0.125898829249801,0.125898829249801,0.750838069832243,"HSPA5/E2F1/GTPBP4/SYMPK/EIF2S1/DDIT3/JUN/FBXW7/EIF4A3/ZNF593/TMSB4X",11
GO:0032204,"GO:0032204","regulation of telomere maintenance","7/649","77/11852",0.127878378208917,0.127878378208917,0.759539986252863,"MAP3K4/SMG7/DKC1/NAT10/GNL3/PINX1/CCT6A",7
GO:0070301,"GO:0070301","cellular response to hydrogen peroxide","7/649","77/11852",0.127878378208917,0.127878378208917,0.759539986252863,"APEX1/PPIF/RIPK1/TRAP1/RPS3/PYCR1/RACK1",7
GO:2001244,"GO:2001244","positive regulation of intrinsic apoptotic signaling pathway","5/649","49/11852",0.128610794456705,0.128610794456705,0.759539986252863,"DDIT3/FBXW7/RPS3/RPS7/RACK1",5
GO:0006779,"GO:0006779","porphyrin-containing compound biosynthetic process","3/649","23/11852",0.128640811960656,0.128640811960656,0.759539986252863,"SLC25A38/TSPO/RSAD1",3
GO:0036475,"GO:0036475","neuron death in response to oxidative stress","3/649","23/11852",0.128640811960656,0.128640811960656,0.759539986252863,"ATF4/FBXW7/RACK1",3
GO:0060306,"GO:0060306","regulation of membrane repolarization","3/649","23/11852",0.128640811960656,0.128640811960656,0.759539986252863,"WDR1/CACNA1D/FLNA",3
GO:0001649,"GO:0001649","osteoblast differentiation","12/649","152/11852",0.129110302201204,0.129110302201204,0.759539986252863,"TNC/FBL/GTPBP4/DDX5/MEF2D/MYBBP1A/SYNCRIP/NOCT/DDX21/RSL1D1/ESRRA/CEBPA",12
GO:0072524,"GO:0072524","pyridine-containing compound metabolic process","12/649","152/11852",0.129110302201204,0.129110302201204,0.759539986252863,"NUP160/PKM/TIGAR/NUP50/OGDH/NUP98/NUP153/ALDOA/HK2/ZBTB7A/PNP/EIF6",12
GO:0031047,"GO:0031047","gene silencing by RNA","14/649","183/11852",0.129140562032672,0.129140562032672,0.759539986252863,"NUP160/NUP50/DDX5/NUP98/ZNFX1/XPO5/NUP153/CNOT1/ZFP36/AJUBA/RIPK1/METTL3/SPOUT1/EIF6",14
GO:0043624,"GO:0043624","cellular protein complex disassembly","15/649","199/11852",0.130467798842106,0.130467798842106,0.765743559075077,"WDR1/JMJD4/MRPL32/ETF1/MRPS26/MRRF/MRPL17/MRPL27/MRPS12/MRPS25/EIF5A/MRPS9/MRPL14/MRPL20/MRPS21",15
GO:0044773,"GO:0044773","mitotic DNA damage checkpoint","8/649","92/11852",0.130594694826611,0.130594694826611,0.765743559075077,"CLSPN/E2F1/CNOT1/PLK2/TFDP1/E2F4/RPA2/PRMT1",8
GO:0008156,"GO:0008156","negative regulation of DNA replication","4/649","36/11852",0.132176809107257,0.132176809107257,0.767488652669828,"LIG3/GTPBP4/MSH6/FBXW7",4
GO:0045746,"GO:0045746","negative regulation of Notch signaling pathway","4/649","36/11852",0.132176809107257,0.132176809107257,0.767488652669828,"METTL3/ZBTB7A/FBXW7/CHAC1",4
GO:1902806,"GO:1902806","regulation of cell cycle G1/S phase transition","12/649","153/11852",0.133581803751852,0.133581803751852,0.767488652669828,"APEX1/E2F1/CNOT1/RIPK1/PLK2/BRD7/TFDP1/E2F4/FBXW7/RPA2/PRMT1/PLRG1",12
GO:0006368,"GO:0006368","transcription elongation from RNA polymerase II promoter","7/649","78/11852",0.134294416055193,0.134294416055193,0.767488652669828,"CCNK/SUPT16H/ELL/SUPT6H/SSRP1/ELOC/ELOB",7
GO:0009108,"GO:0009108","coenzyme biosynthetic process","16/649","216/11852",0.135119529563549,0.135119529563549,0.767488652669828,"NUP160/PKM/TIGAR/NUP50/MTHFD1/OGDH/NUP98/MTHFD1L/UBIAD1/NUP153/ALDOA/GART/HK2/ZBTB7A/ACLY/EIF6",16
GO:0000077,"GO:0000077","DNA damage checkpoint","11/649","138/11852",0.135326916047188,0.135326916047188,0.767488652669828,"CLSPN/E2F1/CNOT1/INTS7/PLK2/CCAR2/PEA15/TFDP1/E2F4/RPA2/PRMT1",11
GO:0051193,"GO:0051193","regulation of cofactor metabolic process","8/649","93/11852",0.136495355368306,0.136495355368306,0.767488652669828,"NUP160/TIGAR/NUP50/NUP98/NUP153/ZBTB7A/NOXO1/EIF6",8
GO:0002312,"GO:0002312","B cell activation involved in immune response","5/649","50/11852",0.136882256115855,0.136882256115855,0.767488652669828,"UNG/CDH17/XBP1/SUPT6H/MSH6",5
GO:0001833,"GO:0001833","inner cell mass cell proliferation","2/649","12/11852",0.13749697204638,0.13749697204638,0.767488652669828,"ZPR1/NDEL1",2
GO:0006000,"GO:0006000","fructose metabolic process","2/649","12/11852",0.13749697204638,0.13749697204638,0.767488652669828,"SORD/ALDOA",2
GO:0006544,"GO:0006544","glycine metabolic process","2/649","12/11852",0.13749697204638,0.13749697204638,0.767488652669828,"GART/PHGDH",2
GO:0006983,"GO:0006983","ER overload response","2/649","12/11852",0.13749697204638,0.13749697204638,0.767488652669828,"HSPA5/DDIT3",2
GO:0007530,"GO:0007530","sex determination","2/649","12/11852",0.13749697204638,0.13749697204638,0.767488652669828,"MAP3K4/SF1",2
GO:0009223,"GO:0009223","pyrimidine deoxyribonucleotide catabolic process","2/649","12/11852",0.13749697204638,0.13749697204638,0.767488652669828,"UNG/DCTPP1",2
GO:0010224,"GO:0010224","response to UV-B","2/649","12/11852",0.13749697204638,0.13749697204638,0.767488652669828,"ERCC6/HYAL2",2
GO:0018216,"GO:0018216","peptidyl-arginine methylation","2/649","12/11852",0.13749697204638,0.13749697204638,0.767488652669828,"PRMT5/PRMT1",2
GO:0034214,"GO:0034214","protein hexamerization","2/649","12/11852",0.13749697204638,0.13749697204638,0.767488652669828,"TWNK/LETM1",2
GO:0043517,"GO:0043517","positive regulation of DNA damage response, signal transduction by p53 class mediator","2/649","12/11852",0.13749697204638,0.13749697204638,0.767488652669828,"DDX5/ANKRD1",2
GO:0045655,"GO:0045655","regulation of monocyte differentiation","2/649","12/11852",0.13749697204638,0.13749697204638,0.767488652669828,"ACIN1/JUN",2
GO:0048305,"GO:0048305","immunoglobulin secretion","2/649","12/11852",0.13749697204638,0.13749697204638,0.767488652669828,"XBP1/TRAF2",2
GO:0051095,"GO:0051095","regulation of helicase activity","2/649","12/11852",0.13749697204638,0.13749697204638,0.767488652669828,"MCM2/MSH6",2
GO:0060211,"GO:0060211","regulation of nuclear-transcribed mRNA poly(A) tail shortening","2/649","12/11852",0.13749697204638,0.13749697204638,0.767488652669828,"CNOT1/ZFP36",2
GO:0060213,"GO:0060213","positive regulation of nuclear-transcribed mRNA poly(A) tail shortening","2/649","12/11852",0.13749697204638,0.13749697204638,0.767488652669828,"CNOT1/ZFP36",2
GO:0070202,"GO:0070202","regulation of establishment of protein localization to chromosome","2/649","12/11852",0.13749697204638,0.13749697204638,0.767488652669828,"DKC1/CCT6A",2
GO:0072697,"GO:0072697","protein localization to cell cortex","2/649","12/11852",0.13749697204638,0.13749697204638,0.767488652669828,"EZR/GNAI1",2
GO:0090085,"GO:0090085","regulation of protein deubiquitination","2/649","12/11852",0.13749697204638,0.13749697204638,0.767488652669828,"SART3/OTUD4",2
GO:0090646,"GO:0090646","mitochondrial tRNA processing","2/649","12/11852",0.13749697204638,0.13749697204638,0.767488652669828,"ELAC2/PUS1",2
GO:0097284,"GO:0097284","hepatocyte apoptotic process","2/649","12/11852",0.13749697204638,0.13749697204638,0.767488652669828,"KRT8/KRT18",2
GO:1900037,"GO:1900037","regulation of cellular response to hypoxia","2/649","12/11852",0.13749697204638,0.13749697204638,0.767488652669828,"AJUBA/DDAH1",2
GO:1902414,"GO:1902414","protein localization to cell junction","2/649","12/11852",0.13749697204638,0.13749697204638,0.767488652669828,"ACTN4/FLNA",2
GO:1904424,"GO:1904424","regulation of GTP binding","2/649","12/11852",0.13749697204638,0.13749697204638,0.767488652669828,"ARHGEF7/EIF2S1",2
GO:1905666,"GO:1905666","regulation of protein localization to endosome","2/649","12/11852",0.13749697204638,0.13749697204638,0.767488652669828,"EZR/MSN",2
GO:1990173,"GO:1990173","protein localization to nucleoplasm","2/649","12/11852",0.13749697204638,0.13749697204638,0.767488652669828,"DKC1/CCT6A",2
GO:0000302,"GO:0000302","response to reactive oxygen species","13/649","170/11852",0.140142101721202,0.140142101721202,0.773390813354929,"APEX1/PPIF/TRAF2/RIPK1/TPM1/FOSL1/JUN/ERCC6/HYAL2/TRAP1/RPS3/PYCR1/RACK1",13
GO:0051701,"GO:0051701","interaction with host","13/649","170/11852",0.140142101721202,0.140142101721202,0.773390813354929,"PVR/SCARB1/CCNK/CHMP4B/TRIM35/SLC1A5/KPNB1/NUP153/IFITM2/TRIM27/SCARB2/HYAL2/SLC20A2",13
GO:0010939,"GO:0010939","regulation of necrotic cell death","3/649","24/11852",0.141371167082569,0.141371167082569,0.773390813354929,"PPIF/RIPK1/TSPO",3
GO:0045494,"GO:0045494","photoreceptor cell maintenance","3/649","24/11852",0.141371167082569,0.141371167082569,0.773390813354929,"IQCB1/ERCC6/DRAM2",3
GO:0060765,"GO:0060765","regulation of androgen receptor signaling pathway","3/649","24/11852",0.141371167082569,0.141371167082569,0.773390813354929,"DDX5/SAFB2/ZBTB7A",3
GO:1900739,"GO:1900739","regulation of protein insertion into mitochondrial membrane involved in apoptotic signaling pathway","3/649","24/11852",0.141371167082569,0.141371167082569,0.773390813354929,"PPP1R13B/E2F1/TFDP1",3
GO:1900740,"GO:1900740","positive regulation of protein insertion into mitochondrial membrane involved in apoptotic signaling pathway","3/649","24/11852",0.141371167082569,0.141371167082569,0.773390813354929,"PPP1R13B/E2F1/TFDP1",3
GO:1902253,"GO:1902253","regulation of intrinsic apoptotic signaling pathway by p53 class mediator","3/649","24/11852",0.141371167082569,0.141371167082569,0.773390813354929,"RRN3/RPS7/PTTG1IP",3
GO:2000104,"GO:2000104","negative regulation of DNA-dependent DNA replication","3/649","24/11852",0.141371167082569,0.141371167082569,0.773390813354929,"LIG3/MSH6/FBXW7",3
GO:0071248,"GO:0071248","cellular response to metal ion","10/649","124/11852",0.141756039731071,0.141756039731071,0.773390813354929,"HSPA5/WNK1/TIGAR/PPIF/ATF4/EIF2S1/JUN/MT1E/TSPO/CEBPA",10
GO:1901657,"GO:1901657","glycosyl compound metabolic process","10/649","124/11852",0.141756039731071,0.141756039731071,0.773390813354929,"CAD/DHODH/UMPS/UCK2/CTPS1/IMPDH2/PNP/NME1/GUK1/PRPS1",10
GO:0003229,"GO:0003229","ventricular cardiac muscle tissue development","4/649","37/11852",0.142184599847506,0.142184599847506,0.773390813354929,"PKP2/MED1/TPM1/CHD7",4
GO:0043001,"GO:0043001","Golgi to plasma membrane protein transport","4/649","37/11852",0.142184599847506,0.142184599847506,0.773390813354929,"GGA2/SEC16A/KRT18/RACK1",4
GO:0044275,"GO:0044275","cellular carbohydrate catabolic process","4/649","37/11852",0.142184599847506,0.142184599847506,0.773390813354929,"TIGAR/SORD/SCARB2/PYGB",4
GO:0097300,"GO:0097300","programmed necrotic cell death","4/649","37/11852",0.142184599847506,0.142184599847506,0.773390813354929,"PPIF/TRAF2/RIPK1/PGAM5",4
GO:0098534,"GO:0098534","centriole assembly","4/649","37/11852",0.142184599847506,0.142184599847506,0.773390813354929,"PLK2/CCDC78/E2F4/RBM14",4
GO:1900408,"GO:1900408","negative regulation of cellular response to oxidative stress","4/649","37/11852",0.142184599847506,0.142184599847506,0.773390813354929,"ATF4/TRAP1/PYCR1/RACK1",4
GO:1903202,"GO:1903202","negative regulation of oxidative stress-induced cell death","4/649","37/11852",0.142184599847506,0.142184599847506,0.773390813354929,"ATF4/TRAP1/PYCR1/RACK1",4
GO:0034612,"GO:0034612","response to tumor necrosis factor","16/649","218/11852",0.142833807047179,0.142833807047179,0.775821617821491,"PSME4/TRAF2/ZFP36/ACTN4/RIPK1/THBS1/ANKRD1/KRT8/TNFRSF12A/HYAL2/KRT18/PSMA5/RPS3/RACK1/TMSB4X/CEBPA",16
GO:1903827,"GO:1903827","regulation of cellular protein localization","30/649","447/11852",0.144062655027676,0.144062655027676,0.779815501114333,"USP36/POLR1A/DNAJA1/HUWE1/PPP1R13B/EZR/MIEF1/E2F1/SUPT6H/ZPR1/BYSL/XPO5/DKC1/CDCA5/MSN/SEC16A/DVL3/GNL3/NOLC1/NDEL1/BDNF/FLNA/TFDP1/PINX1/GNAI1/HYAL2/FBXW7/CCT6A/UBE2G2/RACK1",30
GO:0051303,"GO:0051303","establishment of chromosome localization","6/649","65/11852",0.144179173970782,0.144179173970782,0.779815501114333,"CHMP4B/KPNB1/CDCA5/NDEL1/RRS1/PINX1",6
GO:1900182,"GO:1900182","positive regulation of protein localization to nucleus","6/649","65/11852",0.144179173970782,0.144179173970782,0.779815501114333,"ZPR1/DKC1/FLNA/PINX1/HYAL2/CCT6A",6
GO:0044089,"GO:0044089","positive regulation of cellular component biogenesis","28/649","414/11852",0.14458697545636,0.14458697545636,0.780919720663485,"DHX33/ADGRL1/CDH17/HAS3/WDR75/CNOT1/AJUBA/ARPC5L/TPM1/MSN/CDC42EP2/WDR43/NDEL1/FOSL1/BDNF/JUN/FLNA/TRIM27/ARPC1B/BUD23/WRAP73/RPA2/SDC4/RIOK1/RPS3/UTP15/DRG1/RACK1",28
GO:0016482,"GO:0016482","cytosolic transport","11/649","140/11852",0.145124448884317,0.145124448884317,0.782720212133492,"EZR/ANKRD27/YKT6/TBC1D14/MSN/SYBU/UBE2O/BET1L/ANKFY1/TRIM27/SNX8",11
GO:1903320,"GO:1903320","regulation of protein modification by small protein conjugation or removal","15/649","203/11852",0.146476748155588,0.146476748155588,0.788904189134842,"HSPA5/SART3/DNAJA1/HUWE1/UBE2I/GTPBP4/GNL3/OTUD4/PINX1/TSPO/FBXW7/RPL23/RPS3/RPS7/PTTG1IP",15
GO:0031023,"GO:0031023","microtubule organizing center organization","10/649","125/11852",0.147048354487459,0.147048354487459,0.79087200915009,"CHMP4B/PLK2/CCDC78/NDEL1/XRCC2/E2F4/RBM14/CETN3/HAUS2/HAUS7",10
GO:0007219,"GO:0007219","Notch signaling pathway","11/649","141/11852",0.150159180499287,0.150159180499287,0.805343974323008,"EPN1/YBX1/NLE1/WWC1/WDR12/METTL3/ZBTB7A/RPS19/FBXW7/CHAC1/CEBPA",11
GO:2000045,"GO:2000045","regulation of G1/S transition of mitotic cell cycle","11/649","141/11852",0.150159180499287,0.150159180499287,0.805343974323008,"APEX1/E2F1/CNOT1/RIPK1/PLK2/BRD7/TFDP1/E2F4/RPA2/PRMT1/PLRG1",11
GO:0072521,"GO:0072521","purine-containing compound metabolic process","31/649","466/11852",0.150475006116135,0.150475006116135,0.805910684035696,"AK2/NUP160/PKM/TIGAR/NUP50/MTHFD1/OGDH/PPIF/NUP98/MTHFD1L/NUP153/ALDOA/GART/HK2/IMPDH2/ZBTB7A/PNP/NME1/AFG1L/UQCRB/TSPO/ACLY/GUK1/NDUFB11/PRPS1/ATP6V1B2/NDUFB9/PMVK/UQCC3/TMSB4X/EIF6",31
GO:0032507,"GO:0032507","maintenance of protein location in cell","6/649","66/11852",0.151768360811915,0.151768360811915,0.811703939569563,"HSPA5/EZR/FLNB/HK2/TSPO/TMSB4X",6
GO:0006336,"GO:0006336","DNA replication-independent nucleosome assembly","4/649","38/11852",0.152480882825369,0.152480882825369,0.813246257423057,"NASP/CENPO/RUVBL1/POLE3",4
GO:0031103,"GO:0031103","axon regeneration","4/649","38/11852",0.152480882825369,0.152480882825369,0.813246257423057,"TNC/NDEL1/JUN/TSPO",4
GO:0045638,"GO:0045638","negative regulation of myeloid cell differentiation","5/649","52/11852",0.154102572019917,0.154102572019917,0.816201938110159,"HSPA9/ZFP36/NME1/FBXW7/PRMT1",5
GO:0042542,"GO:0042542","response to hydrogen peroxide","9/649","111/11852",0.154147791935009,0.154147791935009,0.816201938110159,"APEX1/PPIF/RIPK1/FOSL1/JUN/TRAP1/RPS3/PYCR1/RACK1",9
GO:0007007,"GO:0007007","inner mitochondrial membrane organization","3/649","25/11852",0.15450033647783,0.15450033647783,0.816201938110159,"LETM1/TIMM13/UQCC3",3
GO:0010043,"GO:0010043","response to zinc ion","3/649","25/11852",0.15450033647783,0.15450033647783,0.816201938110159,"MT1E/TSPO/CA2",3
GO:0099622,"GO:0099622","cardiac muscle cell membrane repolarization","3/649","25/11852",0.15450033647783,0.15450033647783,0.816201938110159,"WDR1/CACNA1D/FLNA",3
GO:0003222,"GO:0003222","ventricular trabecula myocardium morphogenesis","2/649","13/11852",0.156866260490757,0.156866260490757,0.816201938110159,"MED1/CHD7",2
GO:0006244,"GO:0006244","pyrimidine nucleotide catabolic process","2/649","13/11852",0.156866260490757,0.156866260490757,0.816201938110159,"UNG/DCTPP1",2
GO:0006596,"GO:0006596","polyamine biosynthetic process","2/649","13/11852",0.156866260490757,0.156866260490757,0.816201938110159,"SRM/ODC1",2
GO:0006700,"GO:0006700","C21-steroid hormone biosynthetic process","2/649","13/11852",0.156866260490757,0.156866260490757,0.816201938110159,"ADM/TSPO",2
GO:0010866,"GO:0010866","regulation of triglyceride biosynthetic process","2/649","13/11852",0.156866260490757,0.156866260490757,0.816201938110159,"SCARB1/FBXW7",2
GO:0030575,"GO:0030575","nuclear body organization","2/649","13/11852",0.156866260490757,0.156866260490757,0.816201938110159,"ZPR1/SF1",2
GO:0035809,"GO:0035809","regulation of urine volume","2/649","13/11852",0.156866260490757,0.156866260490757,0.816201938110159,"ADM/HYAL2",2
GO:0046831,"GO:0046831","regulation of RNA export from nucleus","2/649","13/11852",0.156866260490757,0.156866260490757,0.816201938110159,"SUPT6H/NUP153",2
GO:0060074,"GO:0060074","synapse maturation","2/649","13/11852",0.156866260490757,0.156866260490757,0.816201938110159,"ADGRL1/SYBU",2
GO:0060252,"GO:0060252","positive regulation of glial cell proliferation","2/649","13/11852",0.156866260490757,0.156866260490757,0.816201938110159,"E2F1/TSPO",2
GO:0071294,"GO:0071294","cellular response to zinc ion","2/649","13/11852",0.156866260490757,0.156866260490757,0.816201938110159,"MT1E/TSPO",2
GO:1900409,"GO:1900409","positive regulation of cellular response to oxidative stress","2/649","13/11852",0.156866260490757,0.156866260490757,0.816201938110159,"RIPK1/FBXW7",2
GO:1903209,"GO:1903209","positive regulation of oxidative stress-induced cell death","2/649","13/11852",0.156866260490757,0.156866260490757,0.816201938110159,"RIPK1/FBXW7",2
GO:0034614,"GO:0034614","cellular response to reactive oxygen species","10/649","127/11852",0.157931041239881,0.157931041239881,0.82062870237753,"APEX1/PPIF/TRAF2/RIPK1/TPM1/JUN/TRAP1/RPS3/PYCR1/RACK1",10
GO:0097305,"GO:0097305","response to alcohol","11/649","143/11852",0.160494715097187,0.160494715097187,0.832821376111462,"TNC/CAD/AKAP8/LANCL2/SETD7/FOSL1/EIF4EBP1/GNAI1/PMVK/IGFBP7/RPL10A",11
GO:0051651,"GO:0051651","maintenance of location in cell","7/649","82/11852",0.161480704003381,0.161480704003381,0.833842472804907,"HSPA5/EZR/FLNB/HK2/TSPO/SPOUT1/TMSB4X",7
GO:1990823,"GO:1990823","response to leukemia inhibitory factor","7/649","82/11852",0.161480704003381,0.161480704003381,0.833842472804907,"RFX2/XBP1/NCL/SRSF7/SRM/HK2/EIF4A2",7
GO:1990830,"GO:1990830","cellular response to leukemia inhibitory factor","7/649","82/11852",0.161480704003381,0.161480704003381,0.833842472804907,"RFX2/XBP1/NCL/SRSF7/SRM/HK2/EIF4A2",7
GO:0003333,"GO:0003333","amino acid transmembrane transport","5/649","53/11852",0.163033873015164,0.163033873015164,0.833842472804907,"SLC7A6/SLC7A5/SLC1A5/SLC25A38/SLC3A2",5
GO:0032922,"GO:0032922","circadian regulation of gene expression","5/649","53/11852",0.163033873015164,0.163033873015164,0.833842472804907,"HUWE1/PRMT5/ATF4/MYBBP1A/NOCT",5
GO:0048644,"GO:0048644","muscle organ morphogenesis","5/649","53/11852",0.163033873015164,0.163033873015164,0.833842472804907,"PKP2/MED1/TPM1/ANKRD1/CHD7",5
GO:0042149,"GO:0042149","cellular response to glucose starvation","4/649","39/11852",0.163049382702103,0.163049382702103,0.833842472804907,"HSPA5/XBP1/ATF4/MYBBP1A",4
GO:0045646,"GO:0045646","regulation of erythrocyte differentiation","4/649","39/11852",0.163049382702103,0.163049382702103,0.833842472804907,"HSPA9/MED1/ZFP36/PRMT1",4
GO:0051293,"GO:0051293","establishment of spindle localization","4/649","39/11852",0.163049382702103,0.163049382702103,0.833842472804907,"MYH9/BCCIP/KPNB1/NDEL1",4
GO:1902883,"GO:1902883","negative regulation of response to oxidative stress","4/649","39/11852",0.163049382702103,0.163049382702103,0.833842472804907,"ATF4/TRAP1/PYCR1/RACK1",4
GO:0010035,"GO:0010035","response to inorganic substance","26/649","387/11852",0.163198039910729,0.163198039910729,0.833842472804907,"HSPA5/WNK1/TIGAR/APEX1/PPIF/TRAF2/ATF4/EIF2S1/RIPK1/THBS1/SORD/GART/KRT8/FOSL1/JUN/ERCC6/MT1E/TSPO/CA2/TRAP1/EIF4A3/RPS3/PYCR1/LONP1/RACK1/CEBPA",26
GO:0006352,"GO:0006352","DNA-templated transcription, initiation","15/649","207/11852",0.163509265229322,0.163509265229322,0.833842472804907,"THRAP3/POLR1A/POLR1B/MED1/POLR1E/FOSL1/JUN/TEAD4/CRCP/MED4/RRN3/POLR1C/ESRRA/CAVIN1/NR2C2AP",15
GO:1903708,"GO:1903708","positive regulation of hemopoiesis","10/649","128/11852",0.163518271362016,0.163518271362016,0.833842472804907,"XBP1/ACIN1/MED1/RIPK1/SART1/JUN/PNP/PDCD2/CA2/PRMT1",10
GO:0034976,"GO:0034976","response to endoplasmic reticulum stress","18/649","256/11852",0.165645454998432,0.165645454998432,0.843568033213516,"HSPA5/PPP1R15A/XBP1/HM13/TNFRSF10B/TRAF2/ATF4/EIF2S1/THBS1/MANF/SEC16A/DDIT3/JUN/SDF2L1/CHAC1/SRPRB/UBE2G2/RACK1",18
GO:0007568,"GO:0007568","aging","16/649","224/11852",0.167403699473391,0.167403699473391,0.845411964769176,"RAD54L/APEX1/DNAJA3/MSH6/EIF2S1/HMGA1/MMP7/ULK3/PLK2/ADM/RSL1D1/JUN/HYAL2/MBD3/TSPO/LONP1",16
GO:1901988,"GO:1901988","negative regulation of cell cycle phase transition","16/649","224/11852",0.167403699473391,0.167403699473391,0.845411964769176,"ZNF207/CUL1/PSME4/ORC1/CLSPN/E2F1/CNOT1/RIPK1/PLK2/BRD7/TFDP1/E2F4/PINX1/RPA2/PRMT1/PSMA5",16
GO:0072395,"GO:0072395","signal transduction involved in cell cycle checkpoint","6/649","68/11852",0.167463253764612,0.167463253764612,0.845411964769176,"E2F1/CNOT1/PLK2/TFDP1/E2F4/PRMT1",6
GO:0072401,"GO:0072401","signal transduction involved in DNA integrity checkpoint","6/649","68/11852",0.167463253764612,0.167463253764612,0.845411964769176,"E2F1/CNOT1/PLK2/TFDP1/E2F4/PRMT1",6
GO:0072422,"GO:0072422","signal transduction involved in DNA damage checkpoint","6/649","68/11852",0.167463253764612,0.167463253764612,0.845411964769176,"E2F1/CNOT1/PLK2/TFDP1/E2F4/PRMT1",6
GO:0006302,"GO:0006302","double-strand break repair","15/649","208/11852",0.167922937968188,0.167922937968188,0.845411964769176,"LIG3/MCM2/RAD54L/MCM4/MCM3/GINS2/CDCA5/MCM7/ZBTB7A/XRCC2/ACTR5/RPA2/AUNIP/FEN1/SETMAR",15
GO:0000737,"GO:0000737","DNA catabolic process, endonucleolytic","3/649","26/11852",0.167991688524954,0.167991688524954,0.845411964769176,"KPNB1/REXO4/SETMAR",3
GO:0006760,"GO:0006760","folic acid-containing compound metabolic process","3/649","26/11852",0.167991688524954,0.167991688524954,0.845411964769176,"MTHFD1/MTHFD1L/GART",3
GO:0033014,"GO:0033014","tetrapyrrole biosynthetic process","3/649","26/11852",0.167991688524954,0.167991688524954,0.845411964769176,"SLC25A38/TSPO/RSAD1",3
GO:0031100,"GO:0031100","animal organ regeneration","5/649","54/11852",0.172166987232566,0.172166987232566,0.853412068691604,"PKM/CAD/PRMT5/MED1/ADM",5
GO:0046365,"GO:0046365","monosaccharide catabolic process","5/649","54/11852",0.172166987232566,0.172166987232566,0.853412068691604,"PKM/TIGAR/SORD/ALDOA/HK2",5
GO:0051310,"GO:0051310","metaphase plate congression","5/649","54/11852",0.172166987232566,0.172166987232566,0.853412068691604,"CHMP4B/KPNB1/CDCA5/RRS1/PINX1",5
GO:0034508,"GO:0034508","centromere complex assembly","4/649","40/11852",0.173873454248307,0.173873454248307,0.853412068691604,"NASP/CENPO/RUVBL1/POLE3",4
GO:0035196,"GO:0035196","production of miRNAs involved in gene silencing by miRNA","4/649","40/11852",0.173873454248307,0.173873454248307,0.853412068691604,"DDX5/RIPK1/METTL3/SPOUT1",4
GO:0045540,"GO:0045540","regulation of cholesterol biosynthetic process","4/649","40/11852",0.173873454248307,0.173873454248307,0.853412068691604,"NFYA/KPNB1/DHCR7/PMVK",4
GO:0051898,"GO:0051898","negative regulation of protein kinase B signaling","4/649","40/11852",0.173873454248307,0.173873454248307,0.853412068691604,"PHLPP2/DDIT3/HYAL2/RACK1",4
GO:0061614,"GO:0061614","pri-miRNA transcription by RNA polymerase II","4/649","40/11852",0.173873454248307,0.173873454248307,0.853412068691604,"DDX5/GNL3/FOSL1/JUN",4
GO:0106118,"GO:0106118","regulation of sterol biosynthetic process","4/649","40/11852",0.173873454248307,0.173873454248307,0.853412068691604,"NFYA/KPNB1/DHCR7/PMVK",4
GO:0043467,"GO:0043467","regulation of generation of precursor metabolites and energy","10/649","130/11852",0.174975957730765,0.174975957730765,0.853412068691604,"NUP160/TIGAR/NUP50/PPIF/NUP98/NUP153/ZBTB7A/IRS1/TRAP1/EIF6",10
GO:0000422,"GO:0000422","autophagy of mitochondrion","6/649","69/11852",0.17555722251713,0.17555722251713,0.853412068691604,"USP36/TIGAR/HK2/TSPO/FBXW7/WDR45B",6
GO:0061726,"GO:0061726","mitochondrion disassembly","6/649","69/11852",0.17555722251713,0.17555722251713,0.853412068691604,"USP36/TIGAR/HK2/TSPO/FBXW7/WDR45B",6
GO:0000045,"GO:0000045","autophagosome assembly","7/649","84/11852",0.175935185157806,0.175935185157806,0.853412068691604,"CHMP4B/TBC1D14/ULK3/RAB33B/ATG101/EMC6/WDR45B",7
GO:2001022,"GO:2001022","positive regulation of response to DNA damage stimulus","7/649","84/11852",0.175935185157806,0.175935185157806,0.853412068691604,"TIGAR/DDX5/ANKRD1/CCAR2/ERCC6/RPS3/SETMAR",7
GO:0006479,"GO:0006479","protein methylation","11/649","146/11852",0.176643310206436,0.176643310206436,0.853412068691604,"PRMT5/FBL/SUPT6H/ETF1/SETD7/EEF2KMT/SNRPB/PRMT1/NTMT1/SETMAR/WDR5",11
GO:0008213,"GO:0008213","protein alkylation","11/649","146/11852",0.176643310206436,0.176643310206436,0.853412068691604,"PRMT5/FBL/SUPT6H/ETF1/SETD7/EEF2KMT/SNRPB/PRMT1/NTMT1/SETMAR/WDR5",11
GO:0019362,"GO:0019362","pyridine nucleotide metabolic process","11/649","146/11852",0.176643310206436,0.176643310206436,0.853412068691604,"NUP160/PKM/TIGAR/NUP50/OGDH/NUP98/NUP153/ALDOA/HK2/ZBTB7A/EIF6",11
GO:0046496,"GO:0046496","nicotinamide nucleotide metabolic process","11/649","146/11852",0.176643310206436,0.176643310206436,0.853412068691604,"NUP160/PKM/TIGAR/NUP50/OGDH/NUP98/NUP153/ALDOA/HK2/ZBTB7A/EIF6",11
GO:0002313,"GO:0002313","mature B cell differentiation involved in immune response","2/649","14/11852",0.176702916116958,0.176702916116958,0.853412068691604,"CDH17/XBP1",2
GO:0003215,"GO:0003215","cardiac right ventricle morphogenesis","2/649","14/11852",0.176702916116958,0.176702916116958,0.853412068691604,"SEMA3C/CHD7",2
GO:0006122,"GO:0006122","mitochondrial electron transport, ubiquinol to cytochrome c","2/649","14/11852",0.176702916116958,0.176702916116958,0.853412068691604,"UQCRB/UQCC3",2
GO:0006999,"GO:0006999","nuclear pore organization","2/649","14/11852",0.176702916116958,0.176702916116958,0.853412068691604,"NUP98/NUP153",2
GO:0007263,"GO:0007263","nitric oxide mediated signal transduction","2/649","14/11852",0.176702916116958,0.176702916116958,0.853412068691604,"THBS1/DDAH1",2
GO:0009070,"GO:0009070","serine family amino acid biosynthetic process","2/649","14/11852",0.176702916116958,0.176702916116958,0.853412068691604,"MTHFD1/PHGDH",2
GO:0014912,"GO:0014912","negative regulation of smooth muscle cell migration","2/649","14/11852",0.176702916116958,0.176702916116958,0.853412068691604,"APEX1/TPM1",2
GO:0018027,"GO:0018027","peptidyl-lysine dimethylation","2/649","14/11852",0.176702916116958,0.176702916116958,0.853412068691604,"SETD7/SETMAR",2
GO:0030220,"GO:0030220","platelet formation","2/649","14/11852",0.176702916116958,0.176702916116958,0.853412068691604,"WDR1/MYH9",2
GO:0035994,"GO:0035994","response to muscle stretch","2/649","14/11852",0.176702916116958,0.176702916116958,0.853412068691604,"ANKRD1/JUN",2
GO:0042407,"GO:0042407","cristae formation","2/649","14/11852",0.176702916116958,0.176702916116958,0.853412068691604,"LETM1/UQCC3",2
GO:0046037,"GO:0046037","GMP metabolic process","2/649","14/11852",0.176702916116958,0.176702916116958,0.853412068691604,"IMPDH2/GUK1",2
GO:0070935,"GO:0070935","3'-UTR-mediated mRNA stabilization","2/649","14/11852",0.176702916116958,0.176702916116958,0.853412068691604,"ZFP36/RBM38",2
GO:2001026,"GO:2001026","regulation of endothelial cell chemotaxis","2/649","14/11852",0.176702916116958,0.176702916116958,0.853412068691604,"THBS1/TMSB4X",2
GO:0033209,"GO:0033209","tumor necrosis factor-mediated signaling pathway","10/649","131/11852",0.18084273052771,0.18084273052771,0.870398778948244,"PSME4/TRAF2/ACTN4/RIPK1/KRT8/TNFRSF12A/KRT18/PSMA5/RACK1/TMSB4X",10
GO:0030219,"GO:0030219","megakaryocyte differentiation","5/649","55/11852",0.181492331906186,0.181492331906186,0.870398778948244,"MED1/THBS1/PRMT1/WDR5/EIF6",5
GO:0000266,"GO:0000266","mitochondrial fission","3/649","27/11852",0.18180893517449,0.18180893517449,0.870398778948244,"MIEF1/DHODH/INF2",3
GO:0033120,"GO:0033120","positive regulation of RNA splicing","3/649","27/11852",0.18180893517449,0.18180893517449,0.870398778948244,"THRAP3/ZPR1/NUP98",3
GO:0043030,"GO:0043030","regulation of macrophage activation","3/649","27/11852",0.18180893517449,0.18180893517449,0.870398778948244,"THBS1/TNIP2/CEBPA",3
GO:0043516,"GO:0043516","regulation of DNA damage response, signal transduction by p53 class mediator","3/649","27/11852",0.18180893517449,0.18180893517449,0.870398778948244,"DDX5/ANKRD1/PTTG1IP",3
GO:0051085,"GO:0051085","chaperone cofactor-dependent protein refolding","3/649","27/11852",0.18180893517449,0.18180893517449,0.870398778948244,"HSPA5/HSPA9/DNAJC7",3
GO:0006304,"GO:0006304","DNA modification","7/649","85/11852",0.183363444565889,0.183363444565889,0.874507153174517,"UNG/PRMT5/APEX1/OTUD4/MBD3/EXOSC5/EXOSC4",7
GO:0006091,"GO:0006091","generation of precursor metabolites and energy","27/649","410/11852",0.183672687412267,0.183672687412267,0.874507153174517,"NUP160/PKM/TIGAR/NUP50/OGDH/PPIF/NUP98/NUP153/MYBBP1A/ALDH1B1/ALDOA/HK2/ZBTB7A/THTPA/AFG1L/UQCRB/COX11/IRS1/PHGDH/PYGB/TRAP1/TBRG4/NDUFB11/NDUFB9/UQCC3/EIF6/CEBPA",27
GO:0044766,"GO:0044766","multi-organism transport","6/649","70/11852",0.183807336586804,0.183807336586804,0.874507153174517,"NUP160/NUP50/KPNB1/NUP98/NUP153/UBA52",6
GO:1902579,"GO:1902579","multi-organism localization","6/649","70/11852",0.183807336586804,0.183807336586804,0.874507153174517,"NUP160/NUP50/KPNB1/NUP98/NUP153/UBA52",6
GO:1902882,"GO:1902882","regulation of response to oxidative stress","6/649","70/11852",0.183807336586804,0.183807336586804,0.874507153174517,"ATF4/RIPK1/FBXW7/TRAP1/PYCR1/RACK1",6
GO:0019985,"GO:0019985","translesion synthesis","4/649","41/11852",0.184936176258582,0.184936176258582,0.878787569438483,"POLD3/USP10/RPA2/UBA52",4
GO:0002521,"GO:0002521","leukocyte differentiation","22/649","327/11852",0.185573123022421,0.185573123022421,0.880722885839863,"CDH17/XBP1/MYH9/ACIN1/DNAJA3/MED1/RIPK1/METTL3/CHD7/SART1/JUN/ZBTB7A/PNP/NME1/FARP2/CA2/FBXW7/RPL22/RPS6/CMTM7/ESRRA/CEBPA",22
GO:0006733,"GO:0006733","oxidoreduction coenzyme metabolic process","12/649","164/11852",0.188112574439996,0.188112574439996,0.891671470541805,"NUP160/PKM/TIGAR/NUP50/OGDH/NUP98/UBIAD1/NUP153/ALDOA/HK2/ZBTB7A/EIF6",12
GO:0008630,"GO:0008630","intrinsic apoptotic signaling pathway in response to DNA damage","7/649","86/11852",0.190919813646517,0.190919813646517,0.893552265681531,"E2F1/MSH6/BCL2L2/CCAR2/ERCC6/RPS3/AEN",7
GO:0002027,"GO:0002027","regulation of heart rate","5/649","56/11852",0.191000076984228,0.191000076984228,0.893552265681531,"PKP2/TPM1/ADM/CACNA1D/IRX5",5
GO:0009064,"GO:0009064","glutamine family amino acid metabolic process","5/649","56/11852",0.191000076984228,0.191000076984228,0.893552265681531,"CAD/DDAH1/CTPS1/PHGDH/PYCR1",5
GO:1903670,"GO:1903670","regulation of sprouting angiogenesis","5/649","56/11852",0.191000076984228,0.191000076984228,0.893552265681531,"EPN1/PKM/THBS1/PLK2/FBXW7",5
GO:0016197,"GO:0016197","endosomal transport","14/649","197/11852",0.192097971625386,0.192097971625386,0.893552265681531,"CHMP4B/EHD4/ANKRD27/YKT6/CORO1C/CCDC93/TBC1D14/EPG5/UBE2O/BET1L/ANKFY1/TRIM27/SNX8/UBA52",14
GO:0006283,"GO:0006283","transcription-coupled nucleotide-excision repair","6/649","71/11852",0.192207192225193,0.192207192225193,0.893552265681531,"LIG3/POLD3/ERCC6/PPIE/RPA2/UBA52",6
GO:0010927,"GO:0010927","cellular component assembly involved in morphogenesis","6/649","71/11852",0.192207192225193,0.192207192225193,0.893552265681531,"WDR1/RFX2/TPM1/ANKRD1/KRT8/ACTG1",6
GO:0009991,"GO:0009991","response to extracellular stimulus","25/649","379/11852",0.192482103103584,0.192482103103584,0.893552265681531,"TNC/HSPA5/PKM/CAD/XBP1/DHODH/MED1/ZFP36/ATF4/MYBBP1A/EIF2S1/MMP7/SORD/ADM/NOCT/DDIT3/FOSL1/JUN/EIF4EBP1/MBD3/TSPO/RPS19/WDR45B/SRSF2/DCTPP1",25
GO:0001844,"GO:0001844","protein insertion into mitochondrial membrane involved in apoptotic signaling pathway","3/649","28/11852",0.195916338161278,0.195916338161278,0.893552265681531,"PPP1R13B/E2F1/TFDP1",3
GO:0010458,"GO:0010458","exit from mitosis","3/649","28/11852",0.195916338161278,0.195916338161278,0.893552265681531,"CHMP4B/RPL24/CDCA5",3
GO:0030261,"GO:0030261","chromosome condensation","3/649","28/11852",0.195916338161278,0.195916338161278,0.893552265681531,"ACIN1/AKAP8/CDCA5",3
GO:0031424,"GO:0031424","keratinization","4/649","42/11852",0.19622043961842,0.19622043961842,0.893552265681531,"PKP2/PCSK6/KRT8/KRT18",4
GO:1903829,"GO:1903829","positive regulation of cellular protein localization","19/649","280/11852",0.196570094455282,0.196570094455282,0.893552265681531,"USP36/HUWE1/PPP1R13B/EZR/MIEF1/E2F1/ZPR1/DKC1/MSN/SEC16A/GNL3/FLNA/TFDP1/PINX1/GNAI1/HYAL2/FBXW7/CCT6A/RACK1",19
GO:0006958,"GO:0006958","complement activation, classical pathway","2/649","15/11852",0.19689790866754,0.19689790866754,0.893552265681531,"C1QBP/SUSD4",2
GO:0010460,"GO:0010460","positive regulation of heart rate","2/649","15/11852",0.19689790866754,0.19689790866754,0.893552265681531,"TPM1/ADM",2
GO:0016446,"GO:0016446","somatic hypermutation of immunoglobulin genes","2/649","15/11852",0.19689790866754,0.19689790866754,0.893552265681531,"UNG/MSH6",2
GO:0019400,"GO:0019400","alditol metabolic process","2/649","15/11852",0.19689790866754,0.19689790866754,0.893552265681531,"MYOF/SORD",2
GO:0031639,"GO:0031639","plasminogen activation","2/649","15/11852",0.19689790866754,0.19689790866754,0.893552265681531,"PLAU/THBS1",2
GO:0034975,"GO:0034975","protein folding in endoplasmic reticulum","2/649","15/11852",0.19689790866754,0.19689790866754,0.893552265681531,"HSPA5/EMC6",2
GO:0035970,"GO:0035970","peptidyl-threonine dephosphorylation","2/649","15/11852",0.19689790866754,0.19689790866754,0.893552265681531,"PPM1G/DUSP5",2
GO:0036344,"GO:0036344","platelet morphogenesis","2/649","15/11852",0.19689790866754,0.19689790866754,0.893552265681531,"WDR1/MYH9",2
GO:0042401,"GO:0042401","cellular biogenic amine biosynthetic process","2/649","15/11852",0.19689790866754,0.19689790866754,0.893552265681531,"SRM/ODC1",2
GO:0048026,"GO:0048026","positive regulation of mRNA splicing, via spliceosome","2/649","15/11852",0.19689790866754,0.19689790866754,0.893552265681531,"THRAP3/NUP98",2
GO:0051895,"GO:0051895","negative regulation of focal adhesion assembly","2/649","15/11852",0.19689790866754,0.19689790866754,0.893552265681531,"CORO1C/THBS1",2
GO:0051900,"GO:0051900","regulation of mitochondrial depolarization","2/649","15/11852",0.19689790866754,0.19689790866754,0.893552265681531,"TSPO/RACK1",2
GO:0060008,"GO:0060008","Sertoli cell differentiation","2/649","15/11852",0.19689790866754,0.19689790866754,0.893552265681531,"SAFB2/FLNA",2
GO:0061158,"GO:0061158","3'-UTR-mediated mRNA destabilization","2/649","15/11852",0.19689790866754,0.19689790866754,0.893552265681531,"KHSRP/ZFP36",2
GO:0071305,"GO:0071305","cellular response to vitamin D","2/649","15/11852",0.19689790866754,0.19689790866754,0.893552265681531,"TNC/MED1",2
GO:0071800,"GO:0071800","podosome assembly","2/649","15/11852",0.19689790866754,0.19689790866754,0.893552265681531,"MSN/FARP2",2
GO:0072673,"GO:0072673","lamellipodium morphogenesis","2/649","15/11852",0.19689790866754,0.19689790866754,0.893552265681531,"ARHGEF7/CORO1C",2
GO:0089718,"GO:0089718","amino acid import across plasma membrane","2/649","15/11852",0.19689790866754,0.19689790866754,0.893552265681531,"SLC1A5/SLC3A2",2
GO:1902187,"GO:1902187","negative regulation of viral release from host cell","2/649","15/11852",0.19689790866754,0.19689790866754,0.893552265681531,"TRIM35/TRIM27",2
GO:1902884,"GO:1902884","positive regulation of response to oxidative stress","2/649","15/11852",0.19689790866754,0.19689790866754,0.893552265681531,"RIPK1/FBXW7",2
GO:2000482,"GO:2000482","regulation of interleukin-8 secretion","2/649","15/11852",0.19689790866754,0.19689790866754,0.893552265681531,"HYAL2/TMSB4X",2
GO:2000778,"GO:2000778","positive regulation of interleukin-6 secretion","2/649","15/11852",0.19689790866754,0.19689790866754,0.893552265681531,"XBP1/HYAL2",2
GO:2001267,"GO:2001267","regulation of cysteine-type endopeptidase activity involved in apoptotic signaling pathway","2/649","15/11852",0.19689790866754,0.19689790866754,0.893552265681531,"PLAUR/NLE1",2
GO:0009150,"GO:0009150","purine ribonucleotide metabolic process","27/649","414/11852",0.197213369004017,0.197213369004017,0.89392597148393,"AK2/NUP160/PKM/TIGAR/NUP50/OGDH/PPIF/NUP98/NUP153/ALDOA/GART/HK2/IMPDH2/ZBTB7A/NME1/AFG1L/UQCRB/TSPO/ACLY/GUK1/NDUFB11/ATP6V1B2/NDUFB9/PMVK/UQCC3/TMSB4X/EIF6",27
GO:0002576,"GO:0002576","platelet degranulation","7/649","87/11852",0.198599681773058,0.198599681773058,0.898086694015951,"WDR1/ACTN4/THBS1/MANF/ALDOA/FLNA/TMSB4X",7
GO:1905037,"GO:1905037","autophagosome organization","7/649","87/11852",0.198599681773058,0.198599681773058,0.898086694015951,"CHMP4B/TBC1D14/ULK3/RAB33B/ATG101/EMC6/WDR45B",7
GO:0006695,"GO:0006695","cholesterol biosynthetic process","5/649","57/11852",0.200680185127435,0.200680185127435,0.906426029904216,"NFYA/KPNB1/DHCR7/ACLY/PMVK",5
GO:0030260,"GO:0030260","entry into host cell","8/649","103/11852",0.202341790026694,0.202341790026694,0.909645389112417,"PVR/SCARB1/SLC1A5/NUP153/IFITM2/SCARB2/HYAL2/SLC20A2",8
GO:0044409,"GO:0044409","entry into host","8/649","103/11852",0.202341790026694,0.202341790026694,0.909645389112417,"PVR/SCARB1/SLC1A5/NUP153/IFITM2/SCARB2/HYAL2/SLC20A2",8
GO:0051806,"GO:0051806","entry into cell of other organism involved in symbiotic interaction","8/649","103/11852",0.202341790026694,0.202341790026694,0.909645389112417,"PVR/SCARB1/SLC1A5/NUP153/IFITM2/SCARB2/HYAL2/SLC20A2",8
GO:0051828,"GO:0051828","entry into other organism involved in symbiotic interaction","8/649","103/11852",0.202341790026694,0.202341790026694,0.909645389112417,"PVR/SCARB1/SLC1A5/NUP153/IFITM2/SCARB2/HYAL2/SLC20A2",8
GO:0036293,"GO:0036293","response to decreased oxygen levels","19/649","282/11852",0.20503795522335,0.20503795522335,0.920686886328936,"PKM/PSME4/TIGAR/E2F1/PLAU/ATF4/AJUBA/ACTN4/THBS1/ANKRD1/ADM/DDAH1/HK2/EIF4EBP1/ELOC/ELOB/PSMA5/LONP1/UBA52",19
GO:0032677,"GO:0032677","regulation of interleukin-8 production","4/649","43/11852",0.207709029508189,0.207709029508189,0.927251999875416,"RIPK1/DDIT3/HYAL2/TMSB4X",4
GO:0043525,"GO:0043525","positive regulation of neuron apoptotic process","4/649","43/11852",0.207709029508189,0.207709029508189,0.927251999875416,"ATF4/DDIT3/JUN/FBXW7",4
GO:0045600,"GO:0045600","positive regulation of fat cell differentiation","4/649","43/11852",0.207709029508189,0.207709029508189,0.927251999875416,"XBP1/ZFP36/NOCT/CEBPA",4
GO:0045652,"GO:0045652","regulation of megakaryocyte differentiation","4/649","43/11852",0.207709029508189,0.207709029508189,0.927251999875416,"THBS1/PRMT1/WDR5/EIF6",4
GO:0051653,"GO:0051653","spindle localization","4/649","43/11852",0.207709029508189,0.207709029508189,0.927251999875416,"MYH9/BCCIP/KPNB1/NDEL1",4
GO:0043276,"GO:0043276","anoikis","3/649","29/11852",0.210278884404958,0.210278884404958,0.933292712845121,"E2F1/MYBBP1A/TFDP1",3
GO:0051642,"GO:0051642","centrosome localization","3/649","29/11852",0.210278884404958,0.210278884404958,0.933292712845121,"EZR/NDEL1/SPOUT1",3
GO:1900744,"GO:1900744","regulation of p38MAPK cascade","3/649","29/11852",0.210278884404958,0.210278884404958,0.933292712845121,"MAP3K4/EZR/PRMT1",3
GO:0070542,"GO:0070542","response to fatty acid","5/649","58/11852",0.210522450392665,0.210522450392665,0.933292712845121,"TNC/E2F1/AKAP8/NME1/IRS1",5
GO:1901264,"GO:1901264","carbohydrate derivative transport","5/649","58/11852",0.210522450392665,0.210522450392665,0.933292712845121,"SCARB1/SLC25A19/MFSD2A/SLC25A17/GUK1",5
GO:1902653,"GO:1902653","secondary alcohol biosynthetic process","5/649","58/11852",0.210522450392665,0.210522450392665,0.933292712845121,"NFYA/KPNB1/DHCR7/ACLY/PMVK",5
GO:0022612,"GO:0022612","gland morphogenesis","7/649","89/11852",0.214310823877461,0.214310823877461,0.940734155436026,"BTBD7/TNC/SEMA3C/XBP1/MED1/MSN/FBXW7",7
GO:0046394,"GO:0046394","carboxylic acid biosynthetic process","21/649","318/11852",0.215943548848008,0.215943548848008,0.940734155436026,"NUP160/PKM/TIGAR/CAD/NUP50/XBP1/MTHFD1/HAS3/OGDH/NUP98/MTHFD1L/NUP153/ALDOA/GART/HK2/FABP5/ZBTB7A/PHGDH/ACLY/PYCR1/EIF6",21
GO:0000076,"GO:0000076","DNA replication checkpoint","2/649","16/11852",0.217352714419573,0.217352714419573,0.940734155436026,"ORC1/CLSPN",2
GO:0001832,"GO:0001832","blastocyst growth","2/649","16/11852",0.217352714419573,0.217352714419573,0.940734155436026,"ZPR1/NDEL1",2
GO:0002566,"GO:0002566","somatic diversification of immune receptors via somatic mutation","2/649","16/11852",0.217352714419573,0.217352714419573,0.940734155436026,"UNG/MSH6",2
GO:0006595,"GO:0006595","polyamine metabolic process","2/649","16/11852",0.217352714419573,0.217352714419573,0.940734155436026,"SRM/ODC1",2
GO:0006817,"GO:0006817","phosphate ion transport","2/649","16/11852",0.217352714419573,0.217352714419573,0.940734155436026,"ATF4/SLC20A2",2
GO:0007076,"GO:0007076","mitotic chromosome condensation","2/649","16/11852",0.217352714419573,0.217352714419573,0.940734155436026,"AKAP8/CDCA5",2
GO:0007250,"GO:0007250","activation of NF-kappaB-inducing kinase activity","2/649","16/11852",0.217352714419573,0.217352714419573,0.940734155436026,"TNFRSF10B/TRAF2",2
GO:0009309,"GO:0009309","amine biosynthetic process","2/649","16/11852",0.217352714419573,0.217352714419573,0.940734155436026,"SRM/ODC1",2
GO:0033622,"GO:0033622","integrin activation","2/649","16/11852",0.217352714419573,0.217352714419573,0.940734155436026,"CDH17/FARP2",2
GO:0035269,"GO:0035269","protein O-linked mannosylation","2/649","16/11852",0.217352714419573,0.217352714419573,0.940734155436026,"FKRP/SDF2L1",2
GO:0044030,"GO:0044030","regulation of DNA methylation","2/649","16/11852",0.217352714419573,0.217352714419573,0.940734155436026,"PRMT5/MBD3",2
GO:0048820,"GO:0048820","hair follicle maturation","2/649","16/11852",0.217352714419573,0.217352714419573,0.940734155436026,"NSUN2/NOM1",2
GO:0051444,"GO:0051444","negative regulation of ubiquitin-protein transferase activity","2/649","16/11852",0.217352714419573,0.217352714419573,0.940734155436026,"RPL23/RPS7",2
GO:0051882,"GO:0051882","mitochondrial depolarization","2/649","16/11852",0.217352714419573,0.217352714419573,0.940734155436026,"TSPO/RACK1",2
GO:0070200,"GO:0070200","establishment of protein localization to telomere","2/649","16/11852",0.217352714419573,0.217352714419573,0.940734155436026,"DKC1/CCT6A",2
GO:0071379,"GO:0071379","cellular response to prostaglandin stimulus","2/649","16/11852",0.217352714419573,0.217352714419573,0.940734155436026,"TNC/AKAP8",2
GO:1903204,"GO:1903204","negative regulation of oxidative stress-induced neuron death","2/649","16/11852",0.217352714419573,0.217352714419573,0.940734155436026,"ATF4/RACK1",2
GO:1903798,"GO:1903798","regulation of production of miRNAs involved in gene silencing by miRNA","2/649","16/11852",0.217352714419573,0.217352714419573,0.940734155436026,"DDX5/RIPK1",2
GO:2000001,"GO:2000001","regulation of DNA damage checkpoint","2/649","16/11852",0.217352714419573,0.217352714419573,0.940734155436026,"CCAR2/RPA2",2
GO:0061982,"GO:0061982","meiosis I cell cycle process","6/649","74/11852",0.218238654968411,0.218238654968411,0.943503732332429,"RAD54L/MSH6/PSMC3IP/CDC25A/CCNB1IP1/P3H4",6
GO:0019320,"GO:0019320","hexose catabolic process","4/649","44/11852",0.219384701778838,0.219384701778838,0.94526134663549,"PKM/TIGAR/ALDOA/HK2",4
GO:0031050,"GO:0031050","dsRNA processing","4/649","44/11852",0.219384701778838,0.219384701778838,0.94526134663549,"DDX5/RIPK1/METTL3/SPOUT1",4
GO:0070918,"GO:0070918","production of small RNA involved in gene silencing by RNA","4/649","44/11852",0.219384701778838,0.219384701778838,0.94526134663549,"DDX5/RIPK1/METTL3/SPOUT1",4
GO:0016053,"GO:0016053","organic acid biosynthetic process","21/649","319/11852",0.220104782903521,0.220104782903521,0.946364081323391,"NUP160/PKM/TIGAR/CAD/NUP50/XBP1/MTHFD1/HAS3/OGDH/NUP98/MTHFD1L/NUP153/ALDOA/GART/HK2/FABP5/ZBTB7A/PHGDH/ACLY/PYCR1/EIF6",21
GO:0031334,"GO:0031334","positive regulation of protein complex assembly","15/649","219/11852",0.220307088645736,0.220307088645736,0.946364081323391,"DHX33/CDH17/CNOT1/AJUBA/ARPC5L/MSN/CDC42EP2/FOSL1/JUN/TRIM27/ARPC1B/RPA2/RPS3/DRG1/RACK1",15
GO:0045598,"GO:0045598","regulation of fat cell differentiation","7/649","90/11852",0.222332264163022,0.222332264163022,0.946364081323391,"XBP1/E2F1/ZFP36/JDP2/NOCT/DDIT3/CEBPA",7
GO:0001889,"GO:0001889","liver development","8/649","106/11852",0.22423820578464,0.22423820578464,0.946364081323391,"PKM/CAD/XBP1/PRMT5/MED1/JUN/FBXW7/CEBPA",8
GO:1903706,"GO:1903706","regulation of hemopoiesis","21/649","320/11852",0.224302614544625,0.224302614544625,0.946364081323391,"PSME4/XBP1/ACIN1/HSPA9/MED1/ZFP36/RIPK1/THBS1/METTL3/SART1/JUN/PNP/NME1/PDCD2/CA2/FBXW7/PRMT1/PSMA5/ESRRA/WDR5/EIF6",21
GO:0009394,"GO:0009394","2'-deoxyribonucleotide metabolic process","3/649","30/11852",0.224862433737873,0.224862433737873,0.946364081323391,"UNG/GUK1/DCTPP1",3
GO:0009948,"GO:0009948","anterior/posterior axis specification","3/649","30/11852",0.224862433737873,0.224862433737873,0.946364081323391,"PCSK6/ETS2/DDIT3",3
GO:0030195,"GO:0030195","negative regulation of blood coagulation","3/649","30/11852",0.224862433737873,0.224862433737873,0.946364081323391,"PLAUR/PLAU/THBS1",3
GO:0032757,"GO:0032757","positive regulation of interleukin-8 production","3/649","30/11852",0.224862433737873,0.224862433737873,0.946364081323391,"RIPK1/DDIT3/HYAL2",3
GO:0043243,"GO:0043243","positive regulation of protein complex disassembly","3/649","30/11852",0.224862433737873,0.224862433737873,0.946364081323391,"WDR1/JMJD4/EIF5A",3
GO:0061842,"GO:0061842","microtubule organizing center localization","3/649","30/11852",0.224862433737873,0.224862433737873,0.946364081323391,"EZR/NDEL1/SPOUT1",3
GO:0071320,"GO:0071320","cellular response to cAMP","3/649","30/11852",0.224862433737873,0.224862433737873,0.946364081323391,"HSPA5/EZR/APEX1",3
GO:0086009,"GO:0086009","membrane repolarization","3/649","30/11852",0.224862433737873,0.224862433737873,0.946364081323391,"WDR1/CACNA1D/FLNA",3
GO:1900026,"GO:1900026","positive regulation of substrate adhesion-dependent cell spreading","3/649","30/11852",0.224862433737873,0.224862433737873,0.946364081323391,"ARHGEF7/C1QBP/FLNA",3
GO:1900047,"GO:1900047","negative regulation of hemostasis","3/649","30/11852",0.224862433737873,0.224862433737873,0.946364081323391,"PLAUR/PLAU/THBS1",3
GO:1903955,"GO:1903955","positive regulation of protein targeting to mitochondrion","3/649","30/11852",0.224862433737873,0.224862433737873,0.946364081323391,"USP36/HUWE1/FBXW7",3
GO:0016458,"GO:0016458","gene silencing","17/649","254/11852",0.229099533952732,0.229099533952732,0.946364081323391,"NUP160/NUP50/DDX5/NUP98/ZNFX1/XPO5/NUP153/CNOT1/ZFP36/AJUBA/RIPK1/HMGA1/METTL3/MBD3/POLE3/SPOUT1/EIF6",17
GO:0006893,"GO:0006893","Golgi to plasma membrane transport","5/649","60/11852",0.230652007601723,0.230652007601723,0.946364081323391,"GGA2/CCDC93/SEC16A/KRT18/RACK1",5
GO:0001666,"GO:0001666","response to hypoxia","18/649","272/11852",0.235085594677037,0.235085594677037,0.946364081323391,"PKM/PSME4/TIGAR/E2F1/PLAU/AJUBA/ACTN4/THBS1/ANKRD1/ADM/DDAH1/HK2/EIF4EBP1/ELOC/ELOB/PSMA5/LONP1/UBA52",18
GO:0034502,"GO:0034502","protein localization to chromosome","6/649","76/11852",0.236217293610198,0.236217293610198,0.946364081323391,"DKC1/CDCA5/GNL3/PINX1/RPA2/CCT6A",6
GO:1901216,"GO:1901216","positive regulation of neuron death","6/649","76/11852",0.236217293610198,0.236217293610198,0.946364081323391,"PPP1R13B/ATF4/EIF2S1/DDIT3/JUN/FBXW7",6
GO:0043122,"GO:0043122","regulation of I-kappaB kinase/NF-kappaB signaling","13/649","189/11852",0.236474728142846,0.236474728142846,0.946364081323391,"USP10/UBE2I/TNFRSF10B/TRAF2/AJUBA/RIPK1/PLK2/DDX21/FLNA/EEF1D/TNIP2/S100A4/TFG",13
GO:0009200,"GO:0009200","deoxyribonucleoside triphosphate metabolic process","2/649","17/11852",0.23797849534191,0.23797849534191,0.946364081323391,"GUK1/DCTPP1",2
GO:0032743,"GO:0032743","positive regulation of interleukin-2 production","2/649","17/11852",0.23797849534191,0.23797849534191,0.946364081323391,"TRAF2/RPS3",2
GO:0033233,"GO:0033233","regulation of protein sumoylation","2/649","17/11852",0.23797849534191,0.23797849534191,0.946364081323391,"UBE2I/GNL3",2
GO:0034138,"GO:0034138","toll-like receptor 3 signaling pathway","2/649","17/11852",0.23797849534191,0.23797849534191,0.946364081323391,"RIPK1/TNIP2",2
GO:0034162,"GO:0034162","toll-like receptor 9 signaling pathway","2/649","17/11852",0.23797849534191,0.23797849534191,0.946364081323391,"EPG5/TNIP2",2
GO:0045777,"GO:0045777","positive regulation of blood pressure","2/649","17/11852",0.23797849534191,0.23797849534191,0.946364081323391,"WNK1/TPM1",2
GO:0060602,"GO:0060602","branch elongation of an epithelium","2/649","17/11852",0.23797849534191,0.23797849534191,0.946364081323391,"TNC/MED1",2
GO:0070131,"GO:0070131","positive regulation of mitochondrial translation","2/649","17/11852",0.23797849534191,0.23797849534191,0.946364081323391,"C1QBP/RPUSD4",2
GO:0070920,"GO:0070920","regulation of production of small RNA involved in gene silencing by RNA","2/649","17/11852",0.23797849534191,0.23797849534191,0.946364081323391,"DDX5/RIPK1",2
GO:0072606,"GO:0072606","interleukin-8 secretion","2/649","17/11852",0.23797849534191,0.23797849534191,0.946364081323391,"HYAL2/TMSB4X",2
GO:1902254,"GO:1902254","negative regulation of intrinsic apoptotic signaling pathway by p53 class mediator","2/649","17/11852",0.23797849534191,0.23797849534191,0.946364081323391,"RRN3/PTTG1IP",2
GO:2000641,"GO:2000641","regulation of early endosome to late endosome transport","2/649","17/11852",0.23797849534191,0.23797849534191,0.946364081323391,"EZR/MSN",2
GO:2001032,"GO:2001032","regulation of double-strand break repair via nonhomologous end joining","2/649","17/11852",0.23797849534191,0.23797849534191,0.946364081323391,"AUNIP/SETMAR",2
GO:0045185,"GO:0045185","maintenance of protein location","7/649","92/11852",0.238681560824006,0.238681560824006,0.946364081323391,"HSPA5/EZR/FLNB/HK2/FLNA/TSPO/TMSB4X",7
GO:1903008,"GO:1903008","organelle disassembly","7/649","92/11852",0.238681560824006,0.238681560824006,0.946364081323391,"USP36/TIGAR/MRRF/HK2/TSPO/FBXW7/WDR45B",7
GO:0036294,"GO:0036294","cellular response to decreased oxygen levels","12/649","173/11852",0.239252491793299,0.239252491793299,0.946364081323391,"PSME4/TIGAR/E2F1/ATF4/AJUBA/ANKRD1/DDAH1/EIF4EBP1/ELOC/ELOB/PSMA5/UBA52",12
GO:0061008,"GO:0061008","hepaticobiliary system development","8/649","108/11852",0.23929602596064,0.23929602596064,0.946364081323391,"PKM/CAD/XBP1/PRMT5/MED1/JUN/FBXW7/CEBPA",8
GO:0006308,"GO:0006308","DNA catabolic process","3/649","31/11852",0.239633841827935,0.239633841827935,0.946364081323391,"KPNB1/REXO4/SETMAR",3
GO:0016242,"GO:0016242","negative regulation of macroautophagy","3/649","31/11852",0.239633841827935,0.239633841827935,0.946364081323391,"USP36/TIGAR/CHMP4B",3
GO:0019048,"GO:0019048","modulation by virus of host morphology or physiology","3/649","31/11852",0.239633841827935,0.239633841827935,0.946364081323391,"CCNK/KPNB1/HYAL2",3
GO:0050819,"GO:0050819","negative regulation of coagulation","3/649","31/11852",0.239633841827935,0.239633841827935,0.946364081323391,"PLAUR/PLAU/THBS1",3
GO:0051204,"GO:0051204","protein insertion into mitochondrial membrane","3/649","31/11852",0.239633841827935,0.239633841827935,0.946364081323391,"PPP1R13B/E2F1/TFDP1",3
GO:1902186,"GO:1902186","regulation of viral release from host cell","3/649","31/11852",0.239633841827935,0.239633841827935,0.946364081323391,"CHMP4B/TRIM35/TRIM27",3
GO:0016126,"GO:0016126","sterol biosynthetic process","5/649","61/11852",0.240918372478616,0.240918372478616,0.946364081323391,"NFYA/KPNB1/DHCR7/ACLY/PMVK",5
GO:0032637,"GO:0032637","interleukin-8 production","4/649","46/11852",0.243228588325615,0.243228588325615,0.946364081323391,"RIPK1/DDIT3/HYAL2/TMSB4X",4
GO:0042306,"GO:0042306","regulation of protein import into nucleus","4/649","46/11852",0.243228588325615,0.243228588325615,0.946364081323391,"ZPR1/NOLC1/FLNA/HYAL2",4
GO:0030518,"GO:0030518","intracellular steroid hormone receptor signaling pathway","8/649","109/11852",0.246951228216612,0.246951228216612,0.946364081323391,"DNAJA1/DDX5/CNOT1/MED1/SAFB2/SAFB/ZBTB7A/RBM14",8
GO:0046822,"GO:0046822","regulation of nucleocytoplasmic transport","7/649","93/11852",0.246999042663424,0.246999042663424,0.946364081323391,"SUPT6H/ZPR1/XPO5/NUP153/NOLC1/FLNA/HYAL2",7
GO:0048545,"GO:0048545","response to steroid hormone","18/649","276/11852",0.254161549827834,0.254161549827834,0.946364081323391,"CAD/DNAJA1/DDX5/CNOT1/MED1/ZFP36/SAFB2/THBS1/ADM/SAFB/FOSL1/ZBTB7A/EIF4EBP1/RBM14/TSPO/CA2/IGFBP7/ESRRA",18
GO:0006778,"GO:0006778","porphyrin-containing compound metabolic process","3/649","32/11852",0.254561060913781,0.254561060913781,0.946364081323391,"SLC25A38/TSPO/RSAD1",3
GO:0010830,"GO:0010830","regulation of myotube differentiation","3/649","32/11852",0.254561060913781,0.254561060913781,0.946364081323391,"XBP1/RBM38/BDNF",3
GO:0019692,"GO:0019692","deoxyribose phosphate metabolic process","3/649","32/11852",0.254561060913781,0.254561060913781,0.946364081323391,"UNG/GUK1/DCTPP1",3
GO:0032720,"GO:0032720","negative regulation of tumor necrosis factor production","3/649","32/11852",0.254561060913781,0.254561060913781,0.946364081323391,"AKAP8/TRIM27/TSPO",3
GO:0034314,"GO:0034314","Arp2/3 complex-mediated actin nucleation","3/649","32/11852",0.254561060913781,0.254561060913781,0.946364081323391,"ARPC5L/TRIM27/ARPC1B",3
GO:0040001,"GO:0040001","establishment of mitotic spindle localization","3/649","32/11852",0.254561060913781,0.254561060913781,0.946364081323391,"BCCIP/KPNB1/NDEL1",3
GO:0042307,"GO:0042307","positive regulation of protein import into nucleus","3/649","32/11852",0.254561060913781,0.254561060913781,0.946364081323391,"ZPR1/FLNA/HYAL2",3
GO:0042558,"GO:0042558","pteridine-containing compound metabolic process","3/649","32/11852",0.254561060913781,0.254561060913781,0.946364081323391,"MTHFD1/MTHFD1L/GART",3
GO:0045104,"GO:0045104","intermediate filament cytoskeleton organization","3/649","32/11852",0.254561060913781,0.254561060913781,0.946364081323391,"PKP2/NDEL1/KRT18",3
GO:0070266,"GO:0070266","necroptotic process","3/649","32/11852",0.254561060913781,0.254561060913781,0.946364081323391,"PPIF/RIPK1/PGAM5",3
GO:1901030,"GO:1901030","positive regulation of mitochondrial outer membrane permeabilization involved in apoptotic signaling pathway","3/649","32/11852",0.254561060913781,0.254561060913781,0.946364081323391,"PPP1R13B/E2F1/TFDP1",3
GO:0015748,"GO:0015748","organophosphate ester transport","6/649","78/11852",0.254629218149758,0.254629218149758,0.946364081323391,"SCARB1/SLC25A19/EPG5/MFSD2A/SCARB2/SLC25A17",6
GO:0000731,"GO:0000731","DNA synthesis involved in DNA repair","4/649","47/11852",0.25536277521993,0.25536277521993,0.946364081323391,"POLD3/USP10/RPA2/UBA52",4
GO:0009416,"GO:0009416","response to light stimulus","15/649","226/11852",0.25691525455161,0.25691525455161,0.946364081323391,"POLD3/MAP3K4/MSH6/ATF4/EIF2S1/SDE2/CCAR2/CDC25A/METTL3/E2F4/ERCC6/HYAL2/ACTR5/RDH13/FEN1",15
GO:0001958,"GO:0001958","endochondral ossification","2/649","18/11852",0.258695336429283,0.258695336429283,0.946364081323391,"MEF2D/NAB2",2
GO:0008207,"GO:0008207","C21-steroid hormone metabolic process","2/649","18/11852",0.258695336429283,0.258695336429283,0.946364081323391,"ADM/TSPO",2
GO:0016226,"GO:0016226","iron-sulfur cluster assembly","2/649","18/11852",0.258695336429283,0.258695336429283,0.946364081323391,"HSPA9/NUBP2",2
GO:0031065,"GO:0031065","positive regulation of histone deacetylation","2/649","18/11852",0.258695336429283,0.258695336429283,0.946364081323391,"AKAP8/JDP2",2
GO:0031163,"GO:0031163","metallo-sulfur cluster assembly","2/649","18/11852",0.258695336429283,0.258695336429283,0.946364081323391,"HSPA9/NUBP2",2
GO:0032211,"GO:0032211","negative regulation of telomere maintenance via telomerase","2/649","18/11852",0.258695336429283,0.258695336429283,0.946364081323391,"NAT10/PINX1",2
GO:0036075,"GO:0036075","replacement ossification","2/649","18/11852",0.258695336429283,0.258695336429283,0.946364081323391,"MEF2D/NAB2",2
GO:0080111,"GO:0080111","DNA demethylation","2/649","18/11852",0.258695336429283,0.258695336429283,0.946364081323391,"APEX1/OTUD4",2
GO:1903392,"GO:1903392","negative regulation of adherens junction organization","2/649","18/11852",0.258695336429283,0.258695336429283,0.946364081323391,"CORO1C/THBS1",2
GO:0034620,"GO:0034620","cellular response to unfolded protein","9/649","127/11852",0.260290843086814,0.260290843086814,0.946364081323391,"HSPA5/PPP1R15A/XBP1/HSPA9/ATF4/EIF2S1/DDIT3/SRPRB/RACK1",9
GO:1903901,"GO:1903901","negative regulation of viral life cycle","5/649","63/11852",0.261801690650903,0.261801690650903,0.946364081323391,"CCNK/TRIM35/ILF3/IFITM2/TRIM27",5
GO:0030968,"GO:0030968","endoplasmic reticulum unfolded protein response","8/649","111/11852",0.262493980133371,0.262493980133371,0.946364081323391,"HSPA5/PPP1R15A/XBP1/ATF4/EIF2S1/DDIT3/SRPRB/RACK1",8
GO:0010823,"GO:0010823","negative regulation of mitochondrion organization","4/649","48/11852",0.267616103374037,0.267616103374037,0.946364081323391,"LIG3/TIGAR/PPIF/TSPO",4
GO:1904888,"GO:1904888","cranial skeletal system development","4/649","48/11852",0.267616103374037,0.267616103374037,0.946364081323391,"MTHFD1/MTHFD1L/IRX5/EIF4A3",4
GO:0033044,"GO:0033044","regulation of chromosome organization","19/649","296/11852",0.268775877535121,0.268775877535121,0.946364081323391,"ZNF207/MCM2/SART3/MAP3K4/AKAP8/SUPT6H/SMG7/DKC1/NAT10/HMGA1/JDP2/SETD7/CDCA5/GNL3/BRD7/PINX1/CCT6A/FEN1/SETMAR",19
GO:0002204,"GO:0002204","somatic recombination of immunoglobulin genes involved in immune response","3/649","33/11852",0.269613220739183,0.269613220739183,0.946364081323391,"UNG/SUPT6H/MSH6",3
GO:0002208,"GO:0002208","somatic diversification of immunoglobulins involved in immune response","3/649","33/11852",0.269613220739183,0.269613220739183,0.946364081323391,"UNG/SUPT6H/MSH6",3
GO:0007431,"GO:0007431","salivary gland development","3/649","33/11852",0.269613220739183,0.269613220739183,0.946364081323391,"BTBD7/SEMA3C/XBP1",3
GO:0032570,"GO:0032570","response to progesterone","3/649","33/11852",0.269613220739183,0.269613220739183,0.946364081323391,"THBS1/FOSL1/TSPO",3
GO:0045103,"GO:0045103","intermediate filament-based process","3/649","33/11852",0.269613220739183,0.269613220739183,0.946364081323391,"PKP2/NDEL1/KRT18",3
GO:0045190,"GO:0045190","isotype switching","3/649","33/11852",0.269613220739183,0.269613220739183,0.946364081323391,"UNG/SUPT6H/MSH6",3
GO:0045670,"GO:0045670","regulation of osteoclast differentiation","3/649","33/11852",0.269613220739183,0.269613220739183,0.946364081323391,"CA2/FBXW7/ESRRA",3
GO:0070231,"GO:0070231","T cell apoptotic process","3/649","33/11852",0.269613220739183,0.269613220739183,0.946364081323391,"DNAJA3/RIPK1/RPS6",3
GO:1903556,"GO:1903556","negative regulation of tumor necrosis factor superfamily cytokine production","3/649","33/11852",0.269613220739183,0.269613220739183,0.946364081323391,"AKAP8/TRIM27/TSPO",3
GO:0042098,"GO:0042098","T cell proliferation","8/649","112/11852",0.27037328990912,0.27037328990912,0.946364081323391,"ELF4/DNAJA3/MSN/CTPS1/PNP/SDC4/RPS6/RPS3",8
GO:0033157,"GO:0033157","regulation of intracellular protein transport","13/649","195/11852",0.271377754288522,0.271377754288522,0.946364081323391,"USP36/HUWE1/MIEF1/SUPT6H/ZPR1/XPO5/SEC16A/NOLC1/NDEL1/FLNA/HYAL2/FBXW7/UBE2G2",13
GO:0014902,"GO:0014902","myotube differentiation","5/649","64/11852",0.272397633545227,0.272397633545227,0.946364081323391,"XBP1/MYH9/RBM38/MYOF/BDNF",5
GO:0035282,"GO:0035282","segmentation","5/649","64/11852",0.272397633545227,0.272397633545227,0.946364081323391,"NLE1/SEMA3C/PCSK6/IRX3/XRCC2",5
GO:0030048,"GO:0030048","actin filament-based movement","7/649","96/11852",0.272459291686328,0.272459291686328,0.946364081323391,"PKP2/MYH9/ACTN4/TPM1/CACNA1D/FLNA/FRMD6",7
GO:1902107,"GO:1902107","positive regulation of leukocyte differentiation","7/649","96/11852",0.272459291686328,0.272459291686328,0.946364081323391,"XBP1/ACIN1/RIPK1/SART1/JUN/PNP/CA2",7
GO:0051348,"GO:0051348","negative regulation of transferase activity","15/649","229/11852",0.27326506882611,0.27326506882611,0.946364081323391,"WNK1/DNAJA1/CORO1C/ZFP36/AJUBA/DUSP5/TRIM27/PINX1/COX11/HYAL2/RPL23/EIF4A2/RPS7/RACK1/CEBPA",15
GO:0001843,"GO:0001843","neural tube closure","6/649","80/11852",0.273416592721155,0.273416592721155,0.946364081323391,"MTHFD1/MTHFD1L/ADM/DVL3/SDC4/RPS7",6
GO:0060606,"GO:0060606","tube closure","6/649","80/11852",0.273416592721155,0.273416592721155,0.946364081323391,"MTHFD1/MTHFD1L/ADM/DVL3/SDC4/RPS7",6
GO:0010212,"GO:0010212","response to ionizing radiation","9/649","129/11852",0.274990472127647,0.274990472127647,0.946364081323391,"HSPA5/TIGAR/RAD54L/INTS7/XRCC2/ERCC6/EEF1D/POLE3/AEN",9
GO:0062012,"GO:0062012","regulation of small molecule metabolic process","22/649","349/11852",0.276574843381605,0.276574843381605,0.946364081323391,"NFYA/NUP160/PSME4/TIGAR/NUP50/PPIF/KPNB1/NUP98/NUP153/ADM/FABP5/DHCR7/ZBTB7A/COX11/IRS1/TSPO/ODC1/PSMA5/PMVK/WDR5/TMSB4X/EIF6",22
GO:0034332,"GO:0034332","adherens junction organization","8/649","113/11852",0.278318998865489,0.278318998865489,0.946364081323391,"PKP2/PVR/CDH17/ARHGEF7/CORO1C/AJUBA/THBS1/SDC4",8
GO:0009219,"GO:0009219","pyrimidine deoxyribonucleotide metabolic process","2/649","19/11852",0.279431537318047,0.279431537318047,0.946364081323391,"UNG/DCTPP1",2
GO:0009264,"GO:0009264","deoxyribonucleotide catabolic process","2/649","19/11852",0.279431537318047,0.279431537318047,0.946364081323391,"UNG/DCTPP1",2
GO:0018195,"GO:0018195","peptidyl-arginine modification","2/649","19/11852",0.279431537318047,0.279431537318047,0.946364081323391,"PRMT5/PRMT1",2
GO:0019054,"GO:0019054","modulation by virus of host process","2/649","19/11852",0.279431537318047,0.279431537318047,0.946364081323391,"CCNK/KPNB1",2
GO:0035116,"GO:0035116","embryonic hindlimb morphogenesis","2/649","19/11852",0.279431537318047,0.279431537318047,0.946364081323391,"MED1/CHD7",2
GO:0035767,"GO:0035767","endothelial cell chemotaxis","2/649","19/11852",0.279431537318047,0.279431537318047,0.946364081323391,"THBS1/TMSB4X",2
GO:0046655,"GO:0046655","folic acid metabolic process","2/649","19/11852",0.279431537318047,0.279431537318047,0.946364081323391,"MTHFD1/MTHFD1L",2
GO:0046931,"GO:0046931","pore complex assembly","2/649","19/11852",0.279431537318047,0.279431537318047,0.946364081323391,"NUP98/NUP153",2
GO:0050892,"GO:0050892","intestinal absorption","2/649","19/11852",0.279431537318047,0.279431537318047,0.946364081323391,"SCARB1/EZR",2
GO:0055090,"GO:0055090","acylglycerol homeostasis","2/649","19/11852",0.279431537318047,0.279431537318047,0.946364081323391,"SCARB1/XBP1",2
GO:0060445,"GO:0060445","branching involved in salivary gland morphogenesis","2/649","19/11852",0.279431537318047,0.279431537318047,0.946364081323391,"BTBD7/SEMA3C",2
GO:0070328,"GO:0070328","triglyceride homeostasis","2/649","19/11852",0.279431537318047,0.279431537318047,0.946364081323391,"SCARB1/XBP1",2
GO:0071243,"GO:0071243","cellular response to arsenic-containing substance","2/649","19/11852",0.279431537318047,0.279431537318047,0.946364081323391,"PPIF/ATF4",2
GO:1900078,"GO:1900078","positive regulation of cellular response to insulin stimulus","2/649","19/11852",0.279431537318047,0.279431537318047,0.946364081323391,"IRS1/ESRRA",2
GO:1900745,"GO:1900745","positive regulation of p38MAPK cascade","2/649","19/11852",0.279431537318047,0.279431537318047,0.946364081323391,"MAP3K4/PRMT1",2
GO:1901522,"GO:1901522","positive regulation of transcription from RNA polymerase II promoter involved in cellular response to chemical stimulus","2/649","19/11852",0.279431537318047,0.279431537318047,0.946364081323391,"XBP1/ATF4",2
GO:1901889,"GO:1901889","negative regulation of cell junction assembly","2/649","19/11852",0.279431537318047,0.279431537318047,0.946364081323391,"CORO1C/THBS1",2
GO:0032206,"GO:0032206","positive regulation of telomere maintenance","4/649","49/11852",0.279972130833356,0.279972130833356,0.946364081323391,"MAP3K4/DKC1/GNL3/CCT6A",4
GO:0042116,"GO:0042116","macrophage activation","4/649","49/11852",0.279972130833356,0.279972130833356,0.946364081323391,"THBS1/JUN/TNIP2/CEBPA",4
GO:1904589,"GO:1904589","regulation of protein import","4/649","49/11852",0.279972130833356,0.279972130833356,0.946364081323391,"ZPR1/NOLC1/FLNA/HYAL2",4
GO:2001023,"GO:2001023","regulation of response to drug","4/649","49/11852",0.279972130833356,0.279972130833356,0.946364081323391,"RIPK1/TRAP1/PYCR1/RACK1",4
GO:0006109,"GO:0006109","regulation of carbohydrate metabolic process","11/649","163/11852",0.280654094937294,0.280654094937294,0.946364081323391,"NUP160/TIGAR/NUP50/NUP98/NUP153/ZBTB7A/SCARB2/COX11/IRS1/WDR5/EIF6",11
GO:0071456,"GO:0071456","cellular response to hypoxia","11/649","163/11852",0.280654094937294,0.280654094937294,0.946364081323391,"PSME4/TIGAR/E2F1/AJUBA/ANKRD1/DDAH1/EIF4EBP1/ELOC/ELOB/PSMA5/UBA52",11
GO:0043279,"GO:0043279","response to alkaloid","5/649","65/11852",0.28308250517643,0.28308250517643,0.946364081323391,"HSPA5/CAD/DHODH/DHX15/PEA15",5
GO:0046902,"GO:0046902","regulation of mitochondrial membrane permeability","5/649","65/11852",0.28308250517643,0.28308250517643,0.946364081323391,"PPP1R13B/E2F1/PPIF/HK2/TFDP1",5
GO:0006298,"GO:0006298","mismatch repair","3/649","34/11852",0.284760691861581,0.284760691861581,0.946364081323391,"POLD3/MSH6/RPA2",3
GO:0007193,"GO:0007193","adenylate cyclase-inhibiting G protein-coupled receptor signaling pathway","3/649","34/11852",0.284760691861581,0.284760691861581,0.946364081323391,"PRMT5/FLNA/GNAI1",3
GO:0009262,"GO:0009262","deoxyribonucleotide metabolic process","3/649","34/11852",0.284760691861581,0.284760691861581,0.946364081323391,"UNG/GUK1/DCTPP1",3
GO:0032212,"GO:0032212","positive regulation of telomere maintenance via telomerase","3/649","34/11852",0.284760691861581,0.284760691861581,0.946364081323391,"MAP3K4/DKC1/CCT6A",3
GO:0071526,"GO:0071526","semaphorin-plexin signaling pathway","3/649","34/11852",0.284760691861581,0.284760691861581,0.946364081323391,"SEMA3C/FLNA/FARP2",3
GO:0086065,"GO:0086065","cell communication involved in cardiac conduction","3/649","34/11852",0.284760691861581,0.284760691861581,0.946364081323391,"PKP2/CACNA1D/FLNA",3
GO:1904591,"GO:1904591","positive regulation of protein import","3/649","34/11852",0.284760691861581,0.284760691861581,0.946364081323391,"ZPR1/FLNA/HYAL2",3
GO:2000142,"GO:2000142","regulation of DNA-templated transcription, initiation","3/649","34/11852",0.284760691861581,0.284760691861581,0.946364081323391,"FOSL1/JUN/RRN3",3
GO:0035967,"GO:0035967","cellular response to topologically incorrect protein","10/649","147/11852",0.285314240529956,0.285314240529956,0.946364081323391,"HSPA5/PPP1R15A/XBP1/HSPA9/ATF4/EIF2S1/DDIT3/SDF2L1/SRPRB/RACK1",10
GO:0016571,"GO:0016571","histone methylation","8/649","114/11852",0.286326902703003,0.286326902703003,0.946364081323391,"PRMT5/FBL/SUPT6H/SETD7/PRMT1/NTMT1/SETMAR/WDR5",8
GO:0071396,"GO:0071396","cellular response to lipid","26/649","421/11852",0.289419089434909,0.289419089434909,0.946364081323391,"TNC/SCARB1/DNAJA1/DDX18/XBP1/E2F1/AKAP8/DDX5/CNOT1/MED1/ZFP36/BCL2L2/SAFB2/LANCL2/MSN/ANKRD1/SAFB/ZBTB7A/EIF4EBP1/RBM14/NME1/GNAI1/IRS1/TSPO/TNIP2/ESRRA",26
GO:0002244,"GO:0002244","hematopoietic progenitor cell differentiation","9/649","131/11852",0.289923679218573,0.289923679218573,0.946364081323391,"PSME4/HSPA9/PRRC2C/METTL3/RRS1/PDCD2/HYAL2/ARMC6/PSMA5",9
GO:0003073,"GO:0003073","regulation of systemic arterial blood pressure","4/649","50/11852",0.292414728634878,0.292414728634878,0.946364081323391,"WNK1/TPM1/ADM/DDAH1",4
GO:0010827,"GO:0010827","regulation of glucose transmembrane transport","4/649","50/11852",0.292414728634878,0.292414728634878,0.946364081323391,"HK2/PEA15/FABP5/IRS1",4
GO:0051899,"GO:0051899","membrane depolarization","4/649","50/11852",0.292414728634878,0.292414728634878,0.946364081323391,"CACNA1D/JUN/TSPO/RACK1",4
GO:0090181,"GO:0090181","regulation of cholesterol metabolic process","4/649","50/11852",0.292414728634878,0.292414728634878,0.946364081323391,"NFYA/KPNB1/DHCR7/PMVK",4
GO:0046683,"GO:0046683","response to organophosphorus","6/649","82/11852",0.292521215593345,0.292521215593345,0.946364081323391,"HSPA5/EZR/APEX1/FOSL1/JUN/NME1",6
GO:0070482,"GO:0070482","response to oxygen levels","19/649","301/11852",0.293177515935984,0.293177515935984,0.946364081323391,"PKM/PSME4/TIGAR/E2F1/PLAU/ATF4/AJUBA/ACTN4/THBS1/ANKRD1/ADM/DDAH1/HK2/EIF4EBP1/ELOC/ELOB/PSMA5/LONP1/UBA52",19
GO:0033143,"GO:0033143","regulation of intracellular steroid hormone receptor signaling pathway","5/649","66/11852",0.293845959632538,0.293845959632538,0.946364081323391,"DDX5/CNOT1/MED1/SAFB2/ZBTB7A",5
GO:0051260,"GO:0051260","protein homooligomerization","16/649","250/11852",0.295242792054073,0.295242792054073,0.946364081323391,"PKM/HM13/CHMP4B/EHD4/SLC1A5/TWNK/TRAF2/RIPK1/ALDOA/LETM1/IMPDH2/PRMT1/KCTD5/DCTPP1/LONP1/RACK1",16
GO:0007249,"GO:0007249","I-kappaB kinase/NF-kappaB signaling","14/649","216/11852",0.295719888972982,0.295719888972982,0.946364081323391,"USP10/UBE2I/TNFRSF10B/TRAF2/AJUBA/RIPK1/PLK2/DDX21/FLNA/EEF1D/TNIP2/S100A4/UBA52/TFG",14
GO:0051099,"GO:0051099","positive regulation of binding","10/649","149/11852",0.299490283678174,0.299490283678174,0.946364081323391,"PLAUR/EIF3D/TRAF2/EIF2S1/PLK2/CDCA5/BDNF/NME1/PINX1/EDF1",10
GO:0002637,"GO:0002637","regulation of immunoglobulin production","3/649","35/11852",0.299975133314504,0.299975133314504,0.946364081323391,"XBP1/SUPT6H/TRAF2",3
GO:0006904,"GO:0006904","vesicle docking involved in exocytosis","3/649","35/11852",0.299975133314504,0.299975133314504,0.946364081323391,"YKT6/SCFD2/RABEPK",3
GO:0009225,"GO:0009225","nucleotide-sugar metabolic process","3/649","35/11852",0.299975133314504,0.299975133314504,0.946364081323391,"PMM2/GUK1/GMPPB",3
GO:0019076,"GO:0019076","viral release from host cell","3/649","35/11852",0.299975133314504,0.299975133314504,0.946364081323391,"CHMP4B/TRIM35/TRIM27",3
GO:0035307,"GO:0035307","positive regulation of protein dephosphorylation","3/649","35/11852",0.299975133314504,0.299975133314504,0.946364081323391,"PTBP1/PPP1R15A/SYMPK",3
GO:0035890,"GO:0035890","exit from host","3/649","35/11852",0.299975133314504,0.299975133314504,0.946364081323391,"CHMP4B/TRIM35/TRIM27",3
GO:0035891,"GO:0035891","exit from host cell","3/649","35/11852",0.299975133314504,0.299975133314504,0.946364081323391,"CHMP4B/TRIM35/TRIM27",3
GO:0044003,"GO:0044003","modification by symbiont of host morphology or physiology","3/649","35/11852",0.299975133314504,0.299975133314504,0.946364081323391,"CCNK/KPNB1/HYAL2",3
GO:0052126,"GO:0052126","movement in host environment","3/649","35/11852",0.299975133314504,0.299975133314504,0.946364081323391,"CHMP4B/TRIM35/TRIM27",3
GO:0052192,"GO:0052192","movement in environment of other organism involved in symbiotic interaction","3/649","35/11852",0.299975133314504,0.299975133314504,0.946364081323391,"CHMP4B/TRIM35/TRIM27",3
GO:0086002,"GO:0086002","cardiac muscle cell action potential involved in contraction","3/649","35/11852",0.299975133314504,0.299975133314504,0.946364081323391,"PKP2/CACNA1D/FLNA",3
GO:1905898,"GO:1905898","positive regulation of response to endoplasmic reticulum stress","3/649","35/11852",0.299975133314504,0.299975133314504,0.946364081323391,"PPP1R15A/XBP1/DDIT3",3
GO:0006783,"GO:0006783","heme biosynthetic process","2/649","20/11852",0.300122954539626,0.300122954539626,0.946364081323391,"SLC25A38/TSPO",2
GO:0034694,"GO:0034694","response to prostaglandin","2/649","20/11852",0.300122954539626,0.300122954539626,0.946364081323391,"TNC/AKAP8",2
GO:0035456,"GO:0035456","response to interferon-beta","2/649","20/11852",0.300122954539626,0.300122954539626,0.946364081323391,"IFITM2/UBE2G2",2
GO:0042276,"GO:0042276","error-prone translesion synthesis","2/649","20/11852",0.300122954539626,0.300122954539626,0.946364081323391,"RPA2/UBA52",2
GO:0046386,"GO:0046386","deoxyribose phosphate catabolic process","2/649","20/11852",0.300122954539626,0.300122954539626,0.946364081323391,"UNG/DCTPP1",2
GO:0046835,"GO:0046835","carbohydrate phosphorylation","2/649","20/11852",0.300122954539626,0.300122954539626,0.946364081323391,"IPPK/HK2",2
GO:0070987,"GO:0070987","error-free translesion synthesis","2/649","20/11852",0.300122954539626,0.300122954539626,0.946364081323391,"RPA2/UBA52",2
GO:1901381,"GO:1901381","positive regulation of potassium ion transmembrane transport","2/649","20/11852",0.300122954539626,0.300122954539626,0.946364081323391,"WNK1/FLNA",2
GO:1901673,"GO:1901673","regulation of mitotic spindle assembly","2/649","20/11852",0.300122954539626,0.300122954539626,0.946364081323391,"CHMP4B/DRG1",2
GO:1903959,"GO:1903959","regulation of anion transmembrane transport","2/649","20/11852",0.300122954539626,0.300122954539626,0.946364081323391,"RIPK1/THBS1",2
GO:0016064,"GO:0016064","immunoglobulin mediated immune response","5/649","67/11852",0.304677759841502,0.304677759841502,0.946364081323391,"UNG/C1QBP/SUPT6H/MSH6/SUSD4",5
GO:0070613,"GO:0070613","regulation of protein processing","5/649","67/11852",0.304677759841502,0.304677759841502,0.946364081323391,"MYH9/C1QBP/THBS1/CHAC1/SUSD4",5
GO:0006301,"GO:0006301","postreplication repair","4/649","51/11852",0.304928120132855,0.304928120132855,0.946364081323391,"POLD3/USP10/RPA2/UBA52",4
GO:0061077,"GO:0061077","chaperone-mediated protein folding","4/649","51/11852",0.304928120132855,0.304928120132855,0.946364081323391,"HSPA5/HSPA9/DNAJC7/TRAP1",4
GO:0071347,"GO:0071347","cellular response to interleukin-1","9/649","133/11852",0.30506329961046,0.30506329961046,0.946364081323391,"CUL1/PSME4/USP10/ANKRD1/OTUD4/HYAL2/PSMA5/TNIP2/UBA52",9
GO:0071216,"GO:0071216","cellular response to biotic stimulus","10/649","150/11852",0.306645584134305,0.306645584134305,0.946364081323391,"HSPA5/SCARB1/TIGAR/XBP1/AKAP8/ZFP36/ANKRD1/DDIT3/TSPO/TNIP2",10
GO:0001838,"GO:0001838","embryonic epithelial tube formation","7/649","100/11852",0.307390074702685,0.307390074702685,0.946364081323391,"MTHFD1/MTHFD1L/ADM/DVL3/IRX3/SDC4/RPS7",7
GO:0007098,"GO:0007098","centrosome cycle","8/649","117/11852",0.310681466989079,0.310681466989079,0.946364081323391,"CHMP4B/PLK2/NDEL1/XRCC2/RBM14/CETN3/HAUS2/HAUS7",8
GO:0008360,"GO:0008360","regulation of cell shape","8/649","117/11852",0.310681466989079,0.310681466989079,0.946364081323391,"WDR1/EZR/MYH9/RND3/TPM1/MSN/CDC42EP2/ALDOA",8
GO:0010972,"GO:0010972","negative regulation of G2/M transition of mitotic cell cycle","6/649","84/11852",0.311885040078987,0.311885040078987,0.946364081323391,"CUL1/PSME4/ORC1/CLSPN/PINX1/PSMA5",6
GO:1902105,"GO:1902105","regulation of leukocyte differentiation","11/649","168/11852",0.314349525304953,0.314349525304953,0.946364081323391,"XBP1/ACIN1/RIPK1/METTL3/SART1/JUN/PNP/NME1/CA2/FBXW7/ESRRA",11
GO:0006296,"GO:0006296","nucleotide-excision repair, DNA incision, 5'-to lesion","3/649","36/11852",0.315229526424254,0.315229526424254,0.946364081323391,"POLD3/RPA2/UBA52",3
GO:0045599,"GO:0045599","negative regulation of fat cell differentiation","3/649","36/11852",0.315229526424254,0.315229526424254,0.946364081323391,"E2F1/JDP2/DDIT3",3
GO:0046164,"GO:0046164","alcohol catabolic process","3/649","36/11852",0.315229526424254,0.315229526424254,0.946364081323391,"SCARB1/ALDH1B1/SORD",3
GO:0050710,"GO:0050710","negative regulation of cytokine secretion","3/649","36/11852",0.315229526424254,0.315229526424254,0.946364081323391,"EZR/TRIM27/TMSB4X",3
GO:0050805,"GO:0050805","negative regulation of synaptic transmission","3/649","36/11852",0.315229526424254,0.315229526424254,0.946364081323391,"PLK2/GNAI1/EIF4A3",3
GO:0060236,"GO:0060236","regulation of mitotic spindle organization","3/649","36/11852",0.315229526424254,0.315229526424254,0.946364081323391,"CHMP4B/GNAI1/DRG1",3
GO:0072595,"GO:0072595","maintenance of protein localization in organelle","3/649","36/11852",0.315229526424254,0.315229526424254,0.946364081323391,"HSPA5/HK2/TSPO",3
GO:1902116,"GO:1902116","negative regulation of organelle assembly","3/649","36/11852",0.315229526424254,0.315229526424254,0.946364081323391,"CHMP4B/TBC1D30/RBM14",3
GO:0007045,"GO:0007045","cell-substrate adherens junction assembly","5/649","68/11852",0.315567800006335,0.315567800006335,0.946364081323391,"ARHGEF7/CORO1C/AJUBA/THBS1/SDC4",5
GO:0008625,"GO:0008625","extrinsic apoptotic signaling pathway via death domain receptors","5/649","68/11852",0.315567800006335,0.315567800006335,0.946364081323391,"TNFRSF10B/TRAF2/RIPK1/THBS1/PEA15",5
GO:0019724,"GO:0019724","B cell mediated immunity","5/649","68/11852",0.315567800006335,0.315567800006335,0.946364081323391,"UNG/C1QBP/SUPT6H/MSH6/SUSD4",5
GO:0034754,"GO:0034754","cellular hormone metabolic process","5/649","68/11852",0.315567800006335,0.315567800006335,0.946364081323391,"SCARB1/MED1/ADM/TSPO/RDH13",5
GO:0048041,"GO:0048041","focal adhesion assembly","5/649","68/11852",0.315567800006335,0.315567800006335,0.946364081323391,"ARHGEF7/CORO1C/AJUBA/THBS1/SDC4",5
GO:0051289,"GO:0051289","protein homotetramerization","5/649","68/11852",0.315567800006335,0.315567800006335,0.946364081323391,"PKM/HM13/ALDOA/IMPDH2/DCTPP1",5
GO:0061097,"GO:0061097","regulation of protein tyrosine kinase activity","5/649","68/11852",0.315567800006335,0.315567800006335,0.946364081323391,"BDNF/ERCC6/HYAL2/FBXW7/RACK1",5
GO:1901655,"GO:1901655","cellular response to ketone","5/649","68/11852",0.315567800006335,0.315567800006335,0.946364081323391,"TNC/AKAP8/MSN/EIF4EBP1/GNAI1",5
GO:0001836,"GO:0001836","release of cytochrome c from mitochondria","4/649","52/11852",0.317496915808933,0.317496915808933,0.946364081323391,"PLAUR/TIMM50/PPIF/JUN",4
GO:0030521,"GO:0030521","androgen receptor signaling pathway","4/649","52/11852",0.317496915808933,0.317496915808933,0.946364081323391,"DNAJA1/DDX5/SAFB2/ZBTB7A",4
GO:0061951,"GO:0061951","establishment of protein localization to plasma membrane","4/649","52/11852",0.317496915808933,0.317496915808933,0.946364081323391,"GGA2/SEC16A/KRT18/RACK1",4
GO:0071277,"GO:0071277","cellular response to calcium ion","4/649","52/11852",0.317496915808933,0.317496915808933,0.946364081323391,"HSPA5/WNK1/PPIF/JUN",4
GO:0031099,"GO:0031099","regeneration","9/649","135/11852",0.320381906060983,0.320381906060983,0.946364081323391,"TNC/PKM/CAD/PRMT5/MED1/ADM/NDEL1/JUN/TSPO",9
GO:0007063,"GO:0007063","regulation of sister chromatid cohesion","2/649","21/11852",0.320712391003039,0.320712391003039,0.946364081323391,"CDCA5/FEN1",2
GO:0007520,"GO:0007520","myoblast fusion","2/649","21/11852",0.320712391003039,0.320712391003039,0.946364081323391,"MYH9/MYOF",2
GO:0009226,"GO:0009226","nucleotide-sugar biosynthetic process","2/649","21/11852",0.320712391003039,0.320712391003039,0.946364081323391,"PMM2/GMPPB",2
GO:0010499,"GO:0010499","proteasomal ubiquitin-independent protein catabolic process","2/649","21/11852",0.320712391003039,0.320712391003039,0.946364081323391,"PSME4/PSMA5",2
GO:0010661,"GO:0010661","positive regulation of muscle cell apoptotic process","2/649","21/11852",0.320712391003039,0.320712391003039,0.946364081323391,"TIGAR/ATF4",2
GO:0030449,"GO:0030449","regulation of complement activation","2/649","21/11852",0.320712391003039,0.320712391003039,0.946364081323391,"C1QBP/SUSD4",2
GO:0033962,"GO:0033962","cytoplasmic mRNA processing body assembly","2/649","21/11852",0.320712391003039,0.320712391003039,0.946364081323391,"CNOT1/NOCT",2
GO:0040018,"GO:0040018","positive regulation of multicellular organism growth","2/649","21/11852",0.320712391003039,0.320712391003039,0.946364081323391,"EZR/CHD7",2
GO:0043496,"GO:0043496","regulation of protein homodimerization activity","2/649","21/11852",0.320712391003039,0.320712391003039,0.946364081323391,"HSPA5/TRAF2",2
GO:0045730,"GO:0045730","respiratory burst","2/649","21/11852",0.320712391003039,0.320712391003039,0.946364081323391,"NOXO1/RPS19",2
GO:0046599,"GO:0046599","regulation of centriole replication","2/649","21/11852",0.320712391003039,0.320712391003039,0.946364081323391,"PLK2/RBM14",2
GO:0051156,"GO:0051156","glucose 6-phosphate metabolic process","2/649","21/11852",0.320712391003039,0.320712391003039,0.946364081323391,"TIGAR/HK2",2
GO:0071295,"GO:0071295","cellular response to vitamin","2/649","21/11852",0.320712391003039,0.320712391003039,0.946364081323391,"TNC/MED1",2
GO:0090312,"GO:0090312","positive regulation of protein deacetylation","2/649","21/11852",0.320712391003039,0.320712391003039,0.946364081323391,"AKAP8/JDP2",2
GO:1904666,"GO:1904666","regulation of ubiquitin protein ligase activity","2/649","21/11852",0.320712391003039,0.320712391003039,0.946364081323391,"RPL23/RPS7",2
GO:1990126,"GO:1990126","retrograde transport, endosome to plasma membrane","2/649","21/11852",0.320712391003039,0.320712391003039,0.946364081323391,"ANKRD27/CCDC93",2
GO:2000257,"GO:2000257","regulation of protein activation cascade","2/649","21/11852",0.320712391003039,0.320712391003039,0.946364081323391,"C1QBP/SUSD4",2
GO:1902115,"GO:1902115","regulation of organelle assembly","11/649","169/11852",0.3212052706547,0.3212052706547,0.946364081323391,"EZR/CHMP4B/TBC1D30/CNOT1/TBC1D14/PLK2/MSN/RBM14/WRAP73/SDC4/DRG1",11
GO:0014020,"GO:0014020","primary neural tube formation","6/649","85/11852",0.321646173915425,0.321646173915425,0.946364081323391,"MTHFD1/MTHFD1L/ADM/DVL3/SDC4/RPS7",6
GO:0098876,"GO:0098876","vesicle-mediated transport to the plasma membrane","6/649","85/11852",0.321646173915425,0.321646173915425,0.946364081323391,"GGA2/ANKRD27/CCDC93/SEC16A/KRT18/RACK1",6
GO:0051403,"GO:0051403","stress-activated MAPK cascade","14/649","221/11852",0.325497808493774,0.325497808493774,0.946364081323391,"CUL1/MAP3K4/DNAJA1/EZR/TRAF2/ZFP36/RIPK1/DVL3/ERCC6/PRMT1/RPS3/TNIP2/ZNF622/UBA52",14
GO:0006919,"GO:0006919","activation of cysteine-type endopeptidase activity involved in apoptotic process","5/649","69/11852",0.326506126372679,0.326506126372679,0.946364081323391,"TNFRSF10B/TRAF2/RIPK1/PDCD2/RACK1",5
GO:0010507,"GO:0010507","negative regulation of autophagy","5/649","69/11852",0.326506126372679,0.326506126372679,0.946364081323391,"USP36/TIGAR/CHMP4B/TBC1D14/TSPO",5
GO:1903317,"GO:1903317","regulation of protein maturation","5/649","69/11852",0.326506126372679,0.326506126372679,0.946364081323391,"MYH9/C1QBP/THBS1/CHAC1/SUSD4",5
GO:0071453,"GO:0071453","cellular response to oxygen levels","12/649","187/11852",0.327478067290382,0.327478067290382,0.946364081323391,"PSME4/TIGAR/E2F1/ATF4/AJUBA/ANKRD1/DDAH1/EIF4EBP1/ELOC/ELOB/PSMA5/UBA52",12
GO:1904035,"GO:1904035","regulation of epithelial cell apoptotic process","4/649","53/11852",0.330106143792097,0.330106143792097,0.946364081323391,"ZFP36/EIF2S1/THBS1/TNIP2",4
GO:0002381,"GO:0002381","immunoglobulin production involved in immunoglobulin mediated immune response","3/649","37/11852",0.33049819641632,0.33049819641632,0.946364081323391,"UNG/SUPT6H/MSH6",3
GO:0006576,"GO:0006576","cellular biogenic amine metabolic process","3/649","37/11852",0.33049819641632,0.33049819641632,0.946364081323391,"CHDH/SRM/ODC1",3
GO:0035329,"GO:0035329","hippo signaling","3/649","37/11852",0.33049819641632,0.33049819641632,0.946364081323391,"WWC1/AJUBA/TEAD4",3
GO:0045428,"GO:0045428","regulation of nitric oxide biosynthetic process","3/649","37/11852",0.33049819641632,0.33049819641632,0.946364081323391,"KHSRP/DDAH1/TSPO",3
GO:0061098,"GO:0061098","positive regulation of protein tyrosine kinase activity","3/649","37/11852",0.33049819641632,0.33049819641632,0.946364081323391,"BDNF/ERCC6/FBXW7",3
GO:0120163,"GO:0120163","negative regulation of cold-induced thermogenesis","3/649","37/11852",0.33049819641632,0.33049819641632,0.946364081323391,"ATF4/DDIT3/PGAM5",3
GO:1904358,"GO:1904358","positive regulation of telomere maintenance via telomere lengthening","3/649","37/11852",0.33049819641632,0.33049819641632,0.946364081323391,"MAP3K4/DKC1/CCT6A",3
GO:1903900,"GO:1903900","regulation of viral life cycle","8/649","120/11852",0.335443186043084,0.335443186043084,0.946364081323391,"CCNK/CHMP4B/TRIM35/DDX5/ILF3/IFITM2/TRIM27/PPIE",8
GO:0034599,"GO:0034599","cellular response to oxidative stress","15/649","240/11852",0.335899740493037,0.335899740493037,0.946364081323391,"APEX1/PPIF/TRAF2/ATF4/EIF2S1/RIPK1/TPM1/JUN/FBXW7/TRAP1/RPS3/ZNF622/PYCR1/LONP1/RACK1",15
GO:0000726,"GO:0000726","non-recombinational repair","5/649","70/11852",0.337482956356208,0.337482956356208,0.946364081323391,"LIG3/REXO4/ZBTB7A/AUNIP/SETMAR",5
GO:0002455,"GO:0002455","humoral immune response mediated by circulating immunoglobulin","2/649","22/11852",0.341149029518561,0.341149029518561,0.946364081323391,"C1QBP/SUSD4",2
GO:0006882,"GO:0006882","cellular zinc ion homeostasis","2/649","22/11852",0.341149029518561,0.341149029518561,0.946364081323391,"SLC39A14/MT1E",2
GO:0008334,"GO:0008334","histone mRNA metabolic process","2/649","22/11852",0.341149029518561,0.341149029518561,0.946364081323391,"SNRPB/EXOSC4",2
GO:0018126,"GO:0018126","protein hydroxylation","2/649","22/11852",0.341149029518561,0.341149029518561,0.946364081323391,"JMJD4/P3H4",2
GO:0034629,"GO:0034629","cellular protein-containing complex localization","2/649","22/11852",0.341149029518561,0.341149029518561,0.946364081323391,"EZR/KLHL21",2
GO:0035268,"GO:0035268","protein mannosylation","2/649","22/11852",0.341149029518561,0.341149029518561,0.946364081323391,"FKRP/SDF2L1",2
GO:0048384,"GO:0048384","retinoic acid receptor signaling pathway","2/649","22/11852",0.341149029518561,0.341149029518561,0.946364081323391,"CNOT1/ACTN4",2
GO:0061384,"GO:0061384","heart trabecula morphogenesis","2/649","22/11852",0.341149029518561,0.341149029518561,0.946364081323391,"MED1/CHD7",2
GO:0070199,"GO:0070199","establishment of protein localization to chromosome","2/649","22/11852",0.341149029518561,0.341149029518561,0.946364081323391,"DKC1/CCT6A",2
GO:0071392,"GO:0071392","cellular response to estradiol stimulus","2/649","22/11852",0.341149029518561,0.341149029518561,0.946364081323391,"DDX18/BCL2L2",2
GO:0090383,"GO:0090383","phagosome acidification","2/649","22/11852",0.341149029518561,0.341149029518561,0.946364081323391,"ATP6V1C2/ATP6V1B2",2
GO:1903649,"GO:1903649","regulation of cytoplasmic transport","2/649","22/11852",0.341149029518561,0.341149029518561,0.946364081323391,"EZR/MSN",2
GO:1904037,"GO:1904037","positive regulation of epithelial cell apoptotic process","2/649","22/11852",0.341149029518561,0.341149029518561,0.946364081323391,"EIF2S1/THBS1",2
GO:0016579,"GO:0016579","protein deubiquitination","15/649","241/11852",0.341761271803415,0.341761271803415,0.946364081323391,"USP36/PSME4/SART3/CLSPN/USP10/TRAF2/RIPK1/CDC25A/OTUD4/RUVBL1/EPOP/ACTR5/PSMA5/TNIP2/UBA52",15
GO:0031647,"GO:0031647","regulation of protein stability","15/649","241/11852",0.341761271803415,0.341761271803415,0.946364081323391,"ZNF207/USP36/XBP1/GTPBP4/SEC16A/CCAR2/DVL3/FLNA/PINX1/TELO2/FBXW7/RPL23/CCT6A/TNIP2/RPS7",15
GO:0006855,"GO:0006855","drug transmembrane transport","4/649","54/11852",0.34274127631686,0.34274127631686,0.946364081323391,"SLC7A5/SLC1A5/SLC25A19/SLC25A38",4
GO:0034109,"GO:0034109","homotypic cell-cell adhesion","4/649","54/11852",0.34274127631686,0.34274127631686,0.946364081323391,"PKP2/MYH9/ACTG1/FLNA",4
GO:0043266,"GO:0043266","regulation of potassium ion transport","4/649","54/11852",0.34274127631686,0.34274127631686,0.946364081323391,"WNK1/ATF4/CACNA1D/FLNA",4
GO:0044070,"GO:0044070","regulation of anion transport","4/649","54/11852",0.34274127631686,0.34274127631686,0.946364081323391,"ATF4/RIPK1/THBS1/CA2",4
GO:1902686,"GO:1902686","mitochondrial outer membrane permeabilization involved in programmed cell death","4/649","54/11852",0.34274127631686,0.34274127631686,0.946364081323391,"PPP1R13B/E2F1/PPIF/TFDP1",4
GO:0043901,"GO:0043901","negative regulation of multi-organism process","8/649","121/11852",0.343767815539617,0.343767815539617,0.946364081323391,"CCNK/TRIM35/C1QBP/ZFP36/ILF3/JUN/IFITM2/TRIM27",8
GO:0009435,"GO:0009435","NAD biosynthetic process","3/649","38/11852",0.345756823295544,0.345756823295544,0.946364081323391,"PKM/ALDOA/HK2",3
GO:0016447,"GO:0016447","somatic recombination of immunoglobulin gene segments","3/649","38/11852",0.345756823295544,0.345756823295544,0.946364081323391,"UNG/SUPT6H/MSH6",3
GO:0032456,"GO:0032456","endocytic recycling","3/649","38/11852",0.345756823295544,0.345756823295544,0.946364081323391,"EHD4/CCDC93/EPG5",3
GO:0033683,"GO:0033683","nucleotide-excision repair, DNA incision","3/649","38/11852",0.345756823295544,0.345756823295544,0.946364081323391,"POLD3/RPA2/UBA52",3
GO:0035722,"GO:0035722","interleukin-12-mediated signaling pathway","3/649","38/11852",0.345756823295544,0.345756823295544,0.946364081323391,"CNN2/HSPA9/MSN",3
GO:0045022,"GO:0045022","early endosome to late endosome transport","3/649","38/11852",0.345756823295544,0.345756823295544,0.946364081323391,"EZR/ANKRD27/MSN",3
GO:2000772,"GO:2000772","regulation of cellular senescence","3/649","38/11852",0.345756823295544,0.345756823295544,0.946364081323391,"HMGA1/PLK2/RSL1D1",3
GO:0007059,"GO:0007059","chromosome segregation","17/649","277/11852",0.348726698002803,0.348726698002803,0.946364081323391,"ZNF207/CHMP4B/UBE2I/AKAP8/KPNB1/CDCA5/NDEL1/RRS1/RCC1/PINX1/CCNB1IP1/FBXW7/P3H4/NTMT1/RPS3/FEN1/MCMBP",17
GO:0001503,"GO:0001503","ossification","16/649","260/11852",0.351136808928126,0.351136808928126,0.946364081323391,"TNC/TXLNG/FBL/GTPBP4/DDX5/MEF2D/MYBBP1A/SYNCRIP/TUFT1/NOCT/DDX21/RSL1D1/RPL38/NAB2/ESRRA/CEBPA",16
GO:1903825,"GO:1903825","organic acid transmembrane transport","6/649","88/11852",0.351161694490317,0.351161694490317,0.946364081323391,"SLC7A6/SLC7A5/SLC1A5/THBS1/SLC25A38/SLC3A2",6
GO:1905039,"GO:1905039","carboxylic acid transmembrane transport","6/649","88/11852",0.351161694490317,0.351161694490317,0.946364081323391,"SLC7A6/SLC7A5/SLC1A5/THBS1/SLC25A38/SLC3A2",6
GO:0048285,"GO:0048285","organelle fission","22/649","365/11852",0.351262321767455,0.351262321767455,0.946364081323391,"ZNF207/RAD54L/MIEF1/PRMT5/CHMP4B/DHODH/AKAP8/BCCIP/KPNB1/RPL24/PSMC3IP/CDCA5/NDEL1/RRS1/RCC1/FLNA/INF2/PINX1/CCNB1IP1/WRAP73/P3H4/DRG1",22
GO:0140014,"GO:0140014","mitotic nuclear division","15/649","243/11852",0.35354799675604,0.35354799675604,0.946364081323391,"ZNF207/PRMT5/CHMP4B/AKAP8/BCCIP/KPNB1/RPL24/CDCA5/NDEL1/RRS1/RCC1/FLNA/PINX1/WRAP73/DRG1",15
GO:0007062,"GO:0007062","sister chromatid cohesion","4/649","55/11852",0.355388252349069,0.355388252349069,0.946364081323391,"CDCA5/FBXW7/FEN1/MCMBP",4
GO:0019674,"GO:0019674","NAD metabolic process","4/649","55/11852",0.355388252349069,0.355388252349069,0.946364081323391,"PKM/TIGAR/ALDOA/HK2",4
GO:0048678,"GO:0048678","response to axon injury","4/649","55/11852",0.355388252349069,0.355388252349069,0.946364081323391,"TNC/NDEL1/JUN/TSPO",4
GO:0061418,"GO:0061418","regulation of transcription from RNA polymerase II promoter in response to hypoxia","5/649","72/11852",0.359513956241982,0.359513956241982,0.946364081323391,"PSME4/ELOC/ELOB/PSMA5/UBA52",5
GO:0090559,"GO:0090559","regulation of membrane permeability","5/649","72/11852",0.359513956241982,0.359513956241982,0.946364081323391,"PPP1R13B/E2F1/PPIF/HK2/TFDP1",5
GO:0045787,"GO:0045787","positive regulation of cell cycle","19/649","314/11852",0.359558011265411,0.359558011265411,0.946364081323391,"CCNK/APEX1/E2F1/CNOT1/MED1/MYBBP1A/PLK2/CDCA5/CDC25A/FOSL1/EIF4EBP1/TFDP1/E2F4/RPL23/PRMT1/RPS15A/FEN1/SETMAR/PLRG1",19
GO:0007131,"GO:0007131","reciprocal meiotic recombination","3/649","39/11852",0.360982443344997,0.360982443344997,0.946364081323391,"RAD54L/PSMC3IP/CCNB1IP1",3
GO:0008631,"GO:0008631","intrinsic apoptotic signaling pathway in response to oxidative stress","3/649","39/11852",0.360982443344997,0.360982443344997,0.946364081323391,"FBXW7/TRAP1/ZNF622",3
GO:0009069,"GO:0009069","serine family amino acid metabolic process","3/649","39/11852",0.360982443344997,0.360982443344997,0.946364081323391,"MTHFD1/GART/PHGDH",3
GO:0051205,"GO:0051205","protein insertion into membrane","3/649","39/11852",0.360982443344997,0.360982443344997,0.946364081323391,"PPP1R13B/E2F1/TFDP1",3
GO:0090049,"GO:0090049","regulation of cell migration involved in sprouting angiogenesis","3/649","39/11852",0.360982443344997,0.360982443344997,0.946364081323391,"THBS1/PLK2/FBXW7",3
GO:1903214,"GO:1903214","regulation of protein targeting to mitochondrion","3/649","39/11852",0.360982443344997,0.360982443344997,0.946364081323391,"USP36/HUWE1/FBXW7",3
GO:2000649,"GO:2000649","regulation of sodium ion transmembrane transporter activity","3/649","39/11852",0.360982443344997,0.360982443344997,0.946364081323391,"WNK1/ACTN4/CNKSR3",3
GO:0000079,"GO:0000079","regulation of cyclin-dependent protein serine/threonine kinase activity","6/649","89/11852",0.361054528510523,0.361054528510523,0.946364081323391,"CCNK/GTPBP4/BCCIP/CDC25A/SERTAD1/CEBPA",6
GO:0008203,"GO:0008203","cholesterol metabolic process","7/649","106/11852",0.361192214678504,0.361192214678504,0.946364081323391,"NFYA/SCARB1/KPNB1/DHCR7/ACLY/PMVK/CEBPA",7
GO:0030216,"GO:0030216","keratinocyte differentiation","7/649","106/11852",0.361192214678504,0.361192214678504,0.946364081323391,"PKP2/MED1/ZFP36/FLNB/PCSK6/KRT8/KRT18",7
GO:0072175,"GO:0072175","epithelial tube formation","7/649","106/11852",0.361192214678504,0.361192214678504,0.946364081323391,"MTHFD1/MTHFD1L/ADM/DVL3/IRX3/SDC4/RPS7",7
GO:0006730,"GO:0006730","one-carbon metabolic process","2/649","23/11852",0.36138790738122,0.36138790738122,0.946364081323391,"MTHFD1/MTHFD1L",2
GO:0007129,"GO:0007129","synapsis","2/649","23/11852",0.36138790738122,0.36138790738122,0.946364081323391,"CCNB1IP1/P3H4",2
GO:0016339,"GO:0016339","calcium-dependent cell-cell adhesion via plasma membrane cell adhesion molecules","2/649","23/11852",0.36138790738122,0.36138790738122,0.946364081323391,"CDH17/AJUBA",2
GO:0030212,"GO:0030212","hyaluronan metabolic process","2/649","23/11852",0.36138790738122,0.36138790738122,0.946364081323391,"HAS3/HYAL2",2
GO:0031365,"GO:0031365","N-terminal protein amino acid modification","2/649","23/11852",0.36138790738122,0.36138790738122,0.946364081323391,"NAA25/NTMT1",2
GO:0035278,"GO:0035278","miRNA mediated inhibition of translation","2/649","23/11852",0.36138790738122,0.36138790738122,0.946364081323391,"ZFP36/EIF6",2
GO:0036010,"GO:0036010","protein localization to endosome","2/649","23/11852",0.36138790738122,0.36138790738122,0.946364081323391,"EZR/MSN",2
GO:0040033,"GO:0040033","negative regulation of translation, ncRNA-mediated","2/649","23/11852",0.36138790738122,0.36138790738122,0.946364081323391,"ZFP36/EIF6",2
GO:0044068,"GO:0044068","modulation by symbiont of host cellular process","2/649","23/11852",0.36138790738122,0.36138790738122,0.946364081323391,"CCNK/KPNB1",2
GO:0045742,"GO:0045742","positive regulation of epidermal growth factor receptor signaling pathway","2/649","23/11852",0.36138790738122,0.36138790738122,0.946364081323391,"PLAUR/FBXW7",2
GO:0045948,"GO:0045948","positive regulation of translational initiation","2/649","23/11852",0.36138790738122,0.36138790738122,0.946364081323391,"PPP1R15A/METTL3",2
GO:0045974,"GO:0045974","regulation of translation, ncRNA-mediated","2/649","23/11852",0.36138790738122,0.36138790738122,0.946364081323391,"ZFP36/EIF6",2
GO:0051220,"GO:0051220","cytoplasmic sequestering of protein","2/649","23/11852",0.36138790738122,0.36138790738122,0.946364081323391,"FLNA/TMSB4X",2
GO:0055069,"GO:0055069","zinc ion homeostasis","2/649","23/11852",0.36138790738122,0.36138790738122,0.946364081323391,"SLC39A14/MT1E",2
GO:0070861,"GO:0070861","regulation of protein exit from endoplasmic reticulum","2/649","23/11852",0.36138790738122,0.36138790738122,0.946364081323391,"SEC16A/UBE2G2",2
GO:0090207,"GO:0090207","regulation of triglyceride metabolic process","2/649","23/11852",0.36138790738122,0.36138790738122,0.946364081323391,"SCARB1/FBXW7",2
GO:0098901,"GO:0098901","regulation of cardiac muscle cell action potential","2/649","23/11852",0.36138790738122,0.36138790738122,0.946364081323391,"PKP2/FLNA",2
GO:1902175,"GO:1902175","regulation of oxidative stress-induced intrinsic apoptotic signaling pathway","2/649","23/11852",0.36138790738122,0.36138790738122,0.946364081323391,"FBXW7/TRAP1",2
GO:1902745,"GO:1902745","positive regulation of lamellipodium organization","2/649","23/11852",0.36138790738122,0.36138790738122,0.946364081323391,"ARHGEF7/CORO1C",2
GO:1903671,"GO:1903671","negative regulation of sprouting angiogenesis","2/649","23/11852",0.36138790738122,0.36138790738122,0.946364081323391,"EPN1/THBS1",2
GO:1904357,"GO:1904357","negative regulation of telomere maintenance via telomere lengthening","2/649","23/11852",0.36138790738122,0.36138790738122,0.946364081323391,"NAT10/PINX1",2
GO:0098542,"GO:0098542","defense response to other organism","16/649","262/11852",0.362580961394278,0.362580961394278,0.946364081323391,"POLR3B/POLR3E/C1QBP/ILF3/PLAC8/DDX21/IFITM2/FLNA/ERCC6/CRCP/HYAL2/EXOSC5/RPS19/POLR3K/POLR3D/EXOSC4",16
GO:0016485,"GO:0016485","protein processing","11/649","175/11852",0.362952685543533,0.362952685543533,0.946364081323391,"MYH9/HM13/C1QBP/PLAU/THBS1/PCSK6/SDE2/FKRP/CHAC1/PMPCA/SUSD4",11
GO:0019216,"GO:0019216","regulation of lipid metabolic process","18/649","298/11852",0.367824546196622,0.367824546196622,0.946364081323391,"NFYA/SCARB1/KPNB1/MED1/TGS1/ANKRD1/ADM/FABP5/SF1/DHCR7/IRS1/TSPO/EDF1/FBXW7/PMVK/IGFBP7/RACK1/EIF6",18
GO:0035794,"GO:0035794","positive regulation of mitochondrial membrane permeability","4/649","56/11852",0.368033496607903,0.368033496607903,0.946364081323391,"PPP1R13B/E2F1/PPIF/TFDP1",4
GO:0045739,"GO:0045739","positive regulation of DNA repair","4/649","56/11852",0.368033496607903,0.368033496607903,0.946364081323391,"TIGAR/ERCC6/RPS3/SETMAR",4
GO:1902930,"GO:1902930","regulation of alcohol biosynthetic process","4/649","56/11852",0.368033496607903,0.368033496607903,0.946364081323391,"NFYA/KPNB1/DHCR7/PMVK",4
GO:1903426,"GO:1903426","regulation of reactive oxygen species biosynthetic process","4/649","56/11852",0.368033496607903,0.368033496607903,0.946364081323391,"KHSRP/DDAH1/TSPO/TRAP1",4
GO:1905710,"GO:1905710","positive regulation of membrane permeability","4/649","56/11852",0.368033496607903,0.368033496607903,0.946364081323391,"PPP1R13B/E2F1/PPIF/TFDP1",4
GO:0072330,"GO:0072330","monocarboxylic acid biosynthetic process","14/649","228/11852",0.368276013115014,0.368276013115014,0.946364081323391,"NUP160/PKM/TIGAR/NUP50/XBP1/OGDH/NUP98/NUP153/ALDOA/HK2/FABP5/ZBTB7A/ACLY/EIF6",14
GO:0042445,"GO:0042445","hormone metabolic process","8/649","124/11852",0.368895255172098,0.368895255172098,0.946364081323391,"SCARB1/MED1/PCSK6/ADM/SAFB/DHCR7/TSPO/RDH13",8
GO:0046330,"GO:0046330","positive regulation of JNK cascade","7/649","107/11852",0.370255011548334,0.370255011548334,0.946364081323391,"MAP3K4/TRAF2/RIPK1/DVL3/ERCC6/RPS3/ZNF622",7
GO:0002377,"GO:0002377","immunoglobulin production","5/649","73/11852",0.370549566710053,0.370549566710053,0.946364081323391,"UNG/XBP1/SUPT6H/MSH6/TRAF2",5
GO:0033108,"GO:0033108","mitochondrial respiratory chain complex assembly","6/649","90/11852",0.370963261678202,0.370963261678202,0.946364081323391,"TIMM21/UQCRB/NDUFAF4/NDUFB11/NDUFB9/UQCC3",6
GO:0060041,"GO:0060041","retina development in camera-type eye","6/649","90/11852",0.370963261678202,0.370963261678202,0.946364081323391,"RPL24/MED1/CHD7/IRX5/IMPDH2/RDH13",6
GO:0001961,"GO:0001961","positive regulation of cytokine-mediated signaling pathway","3/649","40/11852",0.376153442460945,0.376153442460945,0.946364081323391,"MED1/TRAF2/RIPK1",3
GO:0035825,"GO:0035825","homologous recombination","3/649","40/11852",0.376153442460945,0.376153442460945,0.946364081323391,"RAD54L/PSMC3IP/CCNB1IP1",3
GO:0044088,"GO:0044088","regulation of vacuole organization","3/649","40/11852",0.376153442460945,0.376153442460945,0.946364081323391,"CHMP4B/TBC1D14/SCARB2",3
GO:0070316,"GO:0070316","regulation of G0 to G1 transition","3/649","40/11852",0.376153442460945,0.376153442460945,0.946364081323391,"E2F1/MED1/TFDP1",3
GO:0070527,"GO:0070527","platelet aggregation","3/649","40/11852",0.376153442460945,0.376153442460945,0.946364081323391,"MYH9/ACTG1/FLNA",3
GO:0071349,"GO:0071349","cellular response to interleukin-12","3/649","40/11852",0.376153442460945,0.376153442460945,0.946364081323391,"CNN2/HSPA9/MSN",3
GO:0090224,"GO:0090224","regulation of spindle organization","3/649","40/11852",0.376153442460945,0.376153442460945,0.946364081323391,"CHMP4B/GNAI1/DRG1",3
GO:0090311,"GO:0090311","regulation of protein deacetylation","3/649","40/11852",0.376153442460945,0.376153442460945,0.946364081323391,"AKAP8/JDP2/CCAR2",3
GO:1904705,"GO:1904705","regulation of vascular smooth muscle cell proliferation","3/649","40/11852",0.376153442460945,0.376153442460945,0.946364081323391,"MEF2D/TPM1/JUN",3
GO:1990874,"GO:1990874","vascular smooth muscle cell proliferation","3/649","40/11852",0.376153442460945,0.376153442460945,0.946364081323391,"MEF2D/TPM1/JUN",3
GO:0051321,"GO:0051321","meiotic cell cycle","11/649","177/11852",0.377043623004747,0.377043623004747,0.946364081323391,"NSUN2/RAD54L/MYH9/MSH6/STK35/PSMC3IP/CDC25A/METTL3/XRCC2/CCNB1IP1/P3H4",11
GO:0032479,"GO:0032479","regulation of type I interferon production","7/649","108/11852",0.379331376886094,0.379331376886094,0.946364081323391,"DHX33/POLR3B/POLR3E/CRCP/POLR3K/POLR3D/POLR1C",7
GO:0030512,"GO:0030512","negative regulation of transforming growth factor beta receptor signaling pathway","4/649","57/11852",0.380663935210203,0.380663935210203,0.946364081323391,"HSPA5/ZBTB7A/PEG10/UBA52",4
GO:0001841,"GO:0001841","neural tube formation","6/649","91/11852",0.380881311197819,0.380881311197819,0.946364081323391,"MTHFD1/MTHFD1L/ADM/DVL3/SDC4/RPS7",6
GO:0007188,"GO:0007188","adenylate cyclase-modulating G protein-coupled receptor signaling pathway","6/649","91/11852",0.380881311197819,0.380881311197819,0.946364081323391,"ADGRL1/PRMT5/ADM/CACNA1D/FLNA/GNAI1",6
GO:0051384,"GO:0051384","response to glucocorticoid","6/649","91/11852",0.380881311197819,0.380881311197819,0.946364081323391,"CAD/ZFP36/ADM/FOSL1/EIF4EBP1/IGFBP7",6
GO:0061041,"GO:0061041","regulation of wound healing","6/649","91/11852",0.380881311197819,0.380881311197819,0.946364081323391,"PLAUR/XBP1/MYH9/PLAU/THBS1/TNFRSF12A",6
GO:0070498,"GO:0070498","interleukin-1-mediated signaling pathway","6/649","91/11852",0.380881311197819,0.380881311197819,0.946364081323391,"CUL1/PSME4/OTUD4/PSMA5/TNIP2/UBA52",6
GO:0003401,"GO:0003401","axis elongation","2/649","24/11852",0.381389429226551,0.381389429226551,0.946364081323391,"TNC/MED1",2
GO:0006851,"GO:0006851","mitochondrial calcium ion transmembrane transport","2/649","24/11852",0.381389429226551,0.381389429226551,0.946364081323391,"LETM1/PMPCA",2
GO:0007157,"GO:0007157","heterophilic cell-cell adhesion via plasma membrane cell adhesion molecules","2/649","24/11852",0.381389429226551,0.381389429226551,0.946364081323391,"ADGRL1/PVR",2
GO:0007212,"GO:0007212","dopamine receptor signaling pathway","2/649","24/11852",0.381389429226551,0.381389429226551,0.946364081323391,"PRMT5/FLNA",2
GO:0010586,"GO:0010586","miRNA metabolic process","2/649","24/11852",0.381389429226551,0.381389429226551,0.946364081323391,"KHSRP/XPO5",2
GO:0015695,"GO:0015695","organic cation transport","2/649","24/11852",0.381389429226551,0.381389429226551,0.946364081323391,"SLC25A19/SLC25A17",2
GO:0033137,"GO:0033137","negative regulation of peptidyl-serine phosphorylation","2/649","24/11852",0.381389429226551,0.381389429226551,0.946364081323391,"CNKSR3/RACK1",2
GO:0033280,"GO:0033280","response to vitamin D","2/649","24/11852",0.381389429226551,0.381389429226551,0.946364081323391,"TNC/MED1",2
GO:0035510,"GO:0035510","DNA dealkylation","2/649","24/11852",0.381389429226551,0.381389429226551,0.946364081323391,"APEX1/OTUD4",2
GO:0050685,"GO:0050685","positive regulation of mRNA processing","2/649","24/11852",0.381389429226551,0.381389429226551,0.946364081323391,"THRAP3/NUP98",2
GO:0060251,"GO:0060251","regulation of glial cell proliferation","2/649","24/11852",0.381389429226551,0.381389429226551,0.946364081323391,"E2F1/TSPO",2
GO:0070207,"GO:0070207","protein homotrimerization","2/649","24/11852",0.381389429226551,0.381389429226551,0.946364081323391,"SLC1A5/TRAF2",2
GO:0086091,"GO:0086091","regulation of heart rate by cardiac conduction","2/649","24/11852",0.381389429226551,0.381389429226551,0.946364081323391,"PKP2/CACNA1D",2
GO:0098751,"GO:0098751","bone cell development","2/649","24/11852",0.381389429226551,0.381389429226551,0.946364081323391,"MED1/FBXW7",2
GO:2000273,"GO:2000273","positive regulation of signaling receptor activity","2/649","24/11852",0.381389429226551,0.381389429226551,0.946364081323391,"MED1/FBXW7",2
GO:0031032,"GO:0031032","actomyosin structure organization","9/649","143/11852",0.38289677854563,0.38289677854563,0.946364081323391,"CNN2/WDR1/MYH9/TPM1/ANKRD1/KRT8/ACTG1/SDC4/FRMD6",9
GO:0021700,"GO:0021700","developmental maturation","11/649","178/11852",0.384111044507788,0.384111044507788,0.946364081323391,"NSUN2/ADGRL1/XBP1/ANKRD27/NOM1/SYBU/DDIT3/IRX5/ZBTB7A/FARP2/CEBPA",11
GO:0031396,"GO:0031396","regulation of protein ubiquitination","11/649","178/11852",0.384111044507788,0.384111044507788,0.946364081323391,"HSPA5/DNAJA1/HUWE1/GTPBP4/PINX1/TSPO/FBXW7/RPL23/RPS3/RPS7/PTTG1IP",11
GO:0051495,"GO:0051495","positive regulation of cytoskeleton organization","11/649","178/11852",0.384111044507788,0.384111044507788,0.946364081323391,"WDR1/ARPC5L/TPM1/PFDN2/CDC42EP2/FLNA/TRIM27/ARPC1B/SDC4/RPS3/DRG1",11
GO:0005975,"GO:0005975","carbohydrate metabolic process","27/649","461/11852",0.38635405022353,0.38635405022353,0.946364081323391,"NUP160/PKM/TIGAR/NUP50/HAS3/OGDH/NUP98/NUP153/IPPK/ATF4/ALDH1B1/MYOF/SORD/PMM2/ALDOA/HK2/FABP5/SLC3A2/ZBTB7A/SCARB2/COX11/IRS1/HYAL2/PYGB/MAN2C1/WDR5/EIF6",27
GO:0030879,"GO:0030879","mammary gland development","7/649","109/11852",0.388416289049686,0.388416289049686,0.946364081323391,"CAD/XBP1/DHODH/UMPS/MED1/HK2/NME1",7
GO:0071695,"GO:0071695","anatomical structure maturation","7/649","109/11852",0.388416289049686,0.388416289049686,0.946364081323391,"NSUN2/XBP1/NOM1/DDIT3/IRX5/ZBTB7A/FARP2",7
GO:0032680,"GO:0032680","regulation of tumor necrosis factor production","6/649","92/11852",0.390802224014596,0.390802224014596,0.946364081323391,"AKAP8/ZFP36/RIPK1/THBS1/TRIM27/TSPO",6
GO:1904029,"GO:1904029","regulation of cyclin-dependent protein kinase activity","6/649","92/11852",0.390802224014596,0.390802224014596,0.946364081323391,"CCNK/GTPBP4/BCCIP/CDC25A/SERTAD1/CEBPA",6
GO:0010676,"GO:0010676","positive regulation of cellular carbohydrate metabolic process","3/649","41/11852",0.39124954242429,0.39124954242429,0.946364081323391,"TIGAR/IRS1/WDR5",3
GO:0010824,"GO:0010824","regulation of centrosome duplication","3/649","41/11852",0.39124954242429,0.39124954242429,0.946364081323391,"CHMP4B/PLK2/RBM14",3
GO:0032527,"GO:0032527","protein exit from endoplasmic reticulum","3/649","41/11852",0.39124954242429,0.39124954242429,0.946364081323391,"HM13/SEC16A/UBE2G2",3
GO:0035272,"GO:0035272","exocrine system development","3/649","41/11852",0.39124954242429,0.39124954242429,0.946364081323391,"BTBD7/SEMA3C/XBP1",3
GO:0045010,"GO:0045010","actin nucleation","3/649","41/11852",0.39124954242429,0.39124954242429,0.946364081323391,"ARPC5L/TRIM27/ARPC1B",3
GO:0046324,"GO:0046324","regulation of glucose import","3/649","41/11852",0.39124954242429,0.39124954242429,0.946364081323391,"HK2/PEA15/IRS1",3
GO:0051452,"GO:0051452","intracellular pH reduction","3/649","41/11852",0.39124954242429,0.39124954242429,0.946364081323391,"ATP6V1C2/CA2/ATP6V1B2",3
GO:0070206,"GO:0070206","protein trimerization","3/649","41/11852",0.39124954242429,0.39124954242429,0.946364081323391,"SLC1A5/TRAF2/TRIM27",3
GO:0070671,"GO:0070671","response to interleukin-12","3/649","41/11852",0.39124954242429,0.39124954242429,0.946364081323391,"CNN2/HSPA9/MSN",3
GO:0098927,"GO:0098927","vesicle-mediated transport between endosomal compartments","3/649","41/11852",0.39124954242429,0.39124954242429,0.946364081323391,"EZR/ANKRD27/MSN",3
GO:1901028,"GO:1901028","regulation of mitochondrial outer membrane permeabilization involved in apoptotic signaling pathway","3/649","41/11852",0.39124954242429,0.39124954242429,0.946364081323391,"PPP1R13B/E2F1/TFDP1",3
GO:0070252,"GO:0070252","actin-mediated cell contraction","5/649","75/11852",0.392616329377461,0.392616329377461,0.946364081323391,"PKP2/TPM1/CACNA1D/FLNA/FRMD6",5
GO:0010257,"GO:0010257","NADH dehydrogenase complex assembly","4/649","58/11852",0.393267008159651,0.393267008159651,0.946364081323391,"TIMM21/NDUFAF4/NDUFB11/NDUFB9",4
GO:0032981,"GO:0032981","mitochondrial respiratory chain complex I assembly","4/649","58/11852",0.393267008159651,0.393267008159651,0.946364081323391,"TIMM21/NDUFAF4/NDUFB11/NDUFB9",4
GO:1901224,"GO:1901224","positive regulation of NIK/NF-kappaB signaling","4/649","58/11852",0.393267008159651,0.393267008159651,0.946364081323391,"TNFRSF10B/TRAF2/ACTN4/RPS3",4
GO:1901607,"GO:1901607","alpha-amino acid biosynthetic process","4/649","58/11852",0.393267008159651,0.393267008159651,0.946364081323391,"CAD/MTHFD1/PHGDH/PYCR1",4
GO:0031667,"GO:0031667","response to nutrient levels","21/649","356/11852",0.393975481786717,0.393975481786717,0.946364081323391,"TNC/HSPA5/PKM/CAD/XBP1/DHODH/MED1/ZFP36/ATF4/MYBBP1A/EIF2S1/MMP7/SORD/ADM/DDIT3/JUN/EIF4EBP1/MBD3/TSPO/WDR45B/SRSF2",21
GO:0032874,"GO:0032874","positive regulation of stress-activated MAPK cascade","8/649","127/11852",0.394166819846596,0.394166819846596,0.946364081323391,"MAP3K4/TRAF2/RIPK1/DVL3/ERCC6/PRMT1/RPS3/ZNF622",8
GO:0045444,"GO:0045444","fat cell differentiation","10/649","162/11852",0.394894099584337,0.394894099584337,0.946364081323391,"XBP1/E2F1/MED1/ZFP36/JDP2/PLAC8/NOCT/DDIT3/ZBTB7A/CEBPA",10
GO:1902905,"GO:1902905","positive regulation of supramolecular fiber organization","10/649","162/11852",0.394894099584337,0.394894099584337,0.946364081323391,"WDR1/ARPC5L/TPM1/CDC42EP2/FLNA/TRIM27/ARPC1B/SDC4/RPS3/DRG1",10
GO:0032606,"GO:0032606","type I interferon production","7/649","110/11852",0.397504806548776,0.397504806548776,0.946364081323391,"DHX33/POLR3B/POLR3E/CRCP/POLR3K/POLR3D/POLR1C",7
GO:0051262,"GO:0051262","protein tetramerization","7/649","110/11852",0.397504806548776,0.397504806548776,0.946364081323391,"PKM/HM13/ALDOA/IMPDH2/RCC1/RPS19/DCTPP1",7
GO:1902652,"GO:1902652","secondary alcohol metabolic process","7/649","110/11852",0.397504806548776,0.397504806548776,0.946364081323391,"NFYA/SCARB1/KPNB1/DHCR7/ACLY/PMVK/CEBPA",7
GO:0031124,"GO:0031124","mRNA 3'-end processing","6/649","93/11852",0.400719684797436,0.400719684797436,0.946364081323391,"SRSF7/SRSF4/SYMPK/RNPS1/EIF4A3/SRSF2",6
GO:0035137,"GO:0035137","hindlimb morphogenesis","2/649","25/11852",0.401118915552527,0.401118915552527,0.946364081323391,"MED1/CHD7",2
GO:0040019,"GO:0040019","positive regulation of embryonic development","2/649","25/11852",0.401118915552527,0.401118915552527,0.946364081323391,"RBM19/RACK1",2
GO:0043029,"GO:0043029","T cell homeostasis","2/649","25/11852",0.401118915552527,0.401118915552527,0.946364081323391,"DNAJA3/RPS6",2
GO:0043114,"GO:0043114","regulation of vascular permeability","2/649","25/11852",0.401118915552527,0.401118915552527,0.946364081323391,"ADM/DDAH1",2
GO:0043330,"GO:0043330","response to exogenous dsRNA","2/649","25/11852",0.401118915552527,0.401118915552527,0.946364081323391,"DDX21/SLC3A2",2
GO:0044319,"GO:0044319","wound healing, spreading of cells","2/649","25/11852",0.401118915552527,0.401118915552527,0.946364081323391,"AJUBA/FLNA",2
GO:0045648,"GO:0045648","positive regulation of erythrocyte differentiation","2/649","25/11852",0.401118915552527,0.401118915552527,0.946364081323391,"MED1/PRMT1",2
GO:0045823,"GO:0045823","positive regulation of heart contraction","2/649","25/11852",0.401118915552527,0.401118915552527,0.946364081323391,"TPM1/ADM",2
GO:0051180,"GO:0051180","vitamin transport","2/649","25/11852",0.401118915552527,0.401118915552527,0.946364081323391,"SCARB1/SLC25A19",2
GO:0070129,"GO:0070129","regulation of mitochondrial translation","2/649","25/11852",0.401118915552527,0.401118915552527,0.946364081323391,"C1QBP/RPUSD4",2
GO:0071480,"GO:0071480","cellular response to gamma radiation","2/649","25/11852",0.401118915552527,0.401118915552527,0.946364081323391,"HSPA5/POLE3",2
GO:0072604,"GO:0072604","interleukin-6 secretion","2/649","25/11852",0.401118915552527,0.401118915552527,0.946364081323391,"XBP1/HYAL2",2
GO:0090505,"GO:0090505","epiboly involved in wound healing","2/649","25/11852",0.401118915552527,0.401118915552527,0.946364081323391,"AJUBA/FLNA",2
GO:1901186,"GO:1901186","positive regulation of ERBB signaling pathway","2/649","25/11852",0.401118915552527,0.401118915552527,0.946364081323391,"PLAUR/FBXW7",2
GO:1901797,"GO:1901797","negative regulation of signal transduction by p53 class mediator","2/649","25/11852",0.401118915552527,0.401118915552527,0.946364081323391,"RRN3/PTTG1IP",2
GO:1902895,"GO:1902895","positive regulation of pri-miRNA transcription by RNA polymerase II","2/649","25/11852",0.401118915552527,0.401118915552527,0.946364081323391,"GNL3/JUN",2
GO:2000144,"GO:2000144","positive regulation of DNA-templated transcription, initiation","2/649","25/11852",0.401118915552527,0.401118915552527,0.946364081323391,"FOSL1/JUN",2
GO:0070304,"GO:0070304","positive regulation of stress-activated protein kinase signaling cascade","8/649","128/11852",0.402603956030848,0.402603956030848,0.946364081323391,"MAP3K4/TRAF2/RIPK1/DVL3/ERCC6/PRMT1/RPS3/ZNF622",8
GO:0034333,"GO:0034333","adherens junction assembly","5/649","76/11852",0.403630345980789,0.403630345980789,0.946364081323391,"ARHGEF7/CORO1C/AJUBA/THBS1/SDC4",5
GO:1901532,"GO:1901532","regulation of hematopoietic progenitor cell differentiation","5/649","76/11852",0.403630345980789,0.403630345980789,0.946364081323391,"PSME4/HSPA9/METTL3/PDCD2/PSMA5",5
GO:0051604,"GO:0051604","protein maturation","14/649","234/11852",0.40557424985831,0.40557424985831,0.946364081323391,"MYH9/HM13/C1QBP/NAA25/PLAU/THBS1/PCSK6/SDE2/FKRP/CHAC1/DOHH/CHCHD4/PMPCA/SUSD4",14
GO:0002028,"GO:0002028","regulation of sodium ion transport","4/649","59/11852",0.405830678898511,0.405830678898511,0.946364081323391,"PKP2/WNK1/ACTN4/CNKSR3",4
GO:0030316,"GO:0030316","osteoclast differentiation","4/649","59/11852",0.405830678898511,0.405830678898511,0.946364081323391,"FARP2/CA2/FBXW7/ESRRA",4
GO:0090398,"GO:0090398","cellular senescence","4/649","59/11852",0.405830678898511,0.405830678898511,0.946364081323391,"HMGA1/ULK3/PLK2/RSL1D1",4
GO:1903845,"GO:1903845","negative regulation of cellular response to transforming growth factor beta stimulus","4/649","59/11852",0.405830678898511,0.405830678898511,0.946364081323391,"HSPA5/ZBTB7A/PEG10/UBA52",4
GO:0006376,"GO:0006376","mRNA splice site selection","3/649","42/11852",0.406251781101664,0.406251781101664,0.946364081323391,"SF1/SF3A3/LUC7L",3
GO:0045023,"GO:0045023","G0 to G1 transition","3/649","42/11852",0.406251781101664,0.406251781101664,0.946364081323391,"E2F1/MED1/TFDP1",3
GO:0045851,"GO:0045851","pH reduction","3/649","42/11852",0.406251781101664,0.406251781101664,0.946364081323391,"ATP6V1C2/CA2/ATP6V1B2",3
GO:0019318,"GO:0019318","hexose metabolic process","12/649","199/11852",0.407886711963669,0.407886711963669,0.946364081323391,"PKM/TIGAR/ATF4/SORD/PMM2/ALDOA/HK2/FABP5/COX11/IRS1/MAN2C1/WDR5",12
GO:0006006,"GO:0006006","glucose metabolic process","10/649","164/11852",0.409831763936956,0.409831763936956,0.946364081323391,"PKM/TIGAR/ATF4/SORD/ALDOA/HK2/FABP5/COX11/IRS1/WDR5",10
GO:0009755,"GO:0009755","hormone-mediated signaling pathway","10/649","164/11852",0.409831763936956,0.409831763936956,0.946364081323391,"DNAJA1/DDX5/CNOT1/MED1/SAFB2/LANCL2/SAFB/ZBTB7A/RBM14/ESRRA",10
GO:0048705,"GO:0048705","skeletal system morphogenesis","10/649","164/11852",0.409831763936956,0.409831763936956,0.946364081323391,"NLE1/MTHFD1/MEF2D/MTHFD1L/RAB33B/IRX5/HYAL2/COL7A1/EIF4A3/NAB2",10
GO:0007605,"GO:0007605","sensory perception of sound","6/649","94/11852",0.410627523230445,0.410627523230445,0.946364081323391,"WDR1/CACNA1D/CHD7/RPL38/TIMM13/NDUFB9",6
GO:0042133,"GO:0042133","neurotransmitter metabolic process","6/649","94/11852",0.410627523230445,0.410627523230445,0.946364081323391,"CHDH/KHSRP/DDAH1/GART/PHGDH/TSPO",6
GO:1903555,"GO:1903555","regulation of tumor necrosis factor superfamily cytokine production","6/649","94/11852",0.410627523230445,0.410627523230445,0.946364081323391,"AKAP8/ZFP36/RIPK1/THBS1/TRIM27/TSPO",6
GO:0045069,"GO:0045069","regulation of viral genome replication","5/649","77/11852",0.414620460638364,0.414620460638364,0.946364081323391,"CCNK/DDX5/ILF3/IFITM2/PPIE",5
GO:0045766,"GO:0045766","positive regulation of angiogenesis","7/649","112/11852",0.415673325964833,0.415673325964833,0.946364081323391,"PKM/XBP1/THBS1/PLK2/ADM/DDAH1/HK2",7
GO:0055001,"GO:0055001","muscle cell development","7/649","112/11852",0.415673325964833,0.415673325964833,0.946364081323391,"WDR1/MYOF/TPM1/ANKRD1/ADM/KRT8/ACTG1",7
GO:1903034,"GO:1903034","regulation of response to wounding","7/649","112/11852",0.415673325964833,0.415673325964833,0.946364081323391,"PLAUR/XBP1/MYH9/PLAU/THBS1/NDEL1/TNFRSF12A",7
GO:0061053,"GO:0061053","somite development","4/649","60/11852",0.418343441133995,0.418343441133995,0.946364081323391,"NLE1/SEMA3C/MTHFD1/XRCC2",4
GO:1903046,"GO:1903046","meiotic cell cycle process","8/649","130/11852",0.419474761520691,0.419474761520691,0.946364081323391,"NSUN2/RAD54L/MYH9/MSH6/PSMC3IP/CDC25A/CCNB1IP1/P3H4",8
GO:0032388,"GO:0032388","positive regulation of intracellular transport","11/649","183/11852",0.419572633410713,0.419572633410713,0.946364081323391,"USP36/HUWE1/EZR/MIEF1/ZPR1/MSN/SEC16A/CACNA1D/FLNA/HYAL2/FBXW7",11
GO:0072593,"GO:0072593","reactive oxygen species metabolic process","11/649","183/11852",0.419572633410713,0.419572633410713,0.946364081323391,"TIGAR/KHSRP/RIPK1/THBS1/DDAH1/HK2/AATF/NOXO1/TSPO/TRAP1/EIF6",11
GO:0032640,"GO:0032640","tumor necrosis factor production","6/649","95/11852",0.420519720628145,0.420519720628145,0.946364081323391,"AKAP8/ZFP36/RIPK1/THBS1/TRIM27/TSPO",6
GO:1902750,"GO:1902750","negative regulation of cell cycle G2/M phase transition","6/649","95/11852",0.420519720628145,0.420519720628145,0.946364081323391,"CUL1/PSME4/ORC1/CLSPN/PINX1/PSMA5",6
GO:0000244,"GO:0000244","spliceosomal tri-snRNP complex assembly","2/649","26/11852",0.420546184471491,0.420546184471491,0.946364081323391,"SART3/PRPF3",2
GO:0006956,"GO:0006956","complement activation","2/649","26/11852",0.420546184471491,0.420546184471491,0.946364081323391,"C1QBP/SUSD4",2
GO:0010165,"GO:0010165","response to X-ray","2/649","26/11852",0.420546184471491,0.420546184471491,0.946364081323391,"XRCC2/ERCC6",2
GO:0010470,"GO:0010470","regulation of gastrulation","2/649","26/11852",0.420546184471491,0.420546184471491,0.946364081323391,"WNK1/RACK1",2
GO:0010837,"GO:0010837","regulation of keratinocyte proliferation","2/649","26/11852",0.420546184471491,0.420546184471491,0.946364081323391,"MED1/ZFP36",2
GO:0019432,"GO:0019432","triglyceride biosynthetic process","2/649","26/11852",0.420546184471491,0.420546184471491,0.946364081323391,"SCARB1/FBXW7",2
GO:0031063,"GO:0031063","regulation of histone deacetylation","2/649","26/11852",0.420546184471491,0.420546184471491,0.946364081323391,"AKAP8/JDP2",2
GO:0031116,"GO:0031116","positive regulation of microtubule polymerization","2/649","26/11852",0.420546184471491,0.420546184471491,0.946364081323391,"RPS3/DRG1",2
GO:0033144,"GO:0033144","negative regulation of intracellular steroid hormone receptor signaling pathway","2/649","26/11852",0.420546184471491,0.420546184471491,0.946364081323391,"CNOT1/ZBTB7A",2
GO:0035666,"GO:0035666","TRIF-dependent toll-like receptor signaling pathway","2/649","26/11852",0.420546184471491,0.420546184471491,0.946364081323391,"RIPK1/UBA52",2
GO:0045738,"GO:0045738","negative regulation of DNA repair","2/649","26/11852",0.420546184471491,0.420546184471491,0.946364081323391,"AUNIP/RPS3",2
GO:0090504,"GO:0090504","epiboly","2/649","26/11852",0.420546184471491,0.420546184471491,0.946364081323391,"AJUBA/FLNA",2
GO:1900027,"GO:1900027","regulation of ruffle assembly","2/649","26/11852",0.420546184471491,0.420546184471491,0.946364081323391,"CORO1C/NDEL1",2
GO:0031529,"GO:0031529","ruffle organization","3/649","43/11852",0.421142487471175,0.421142487471175,0.946364081323391,"CORO1C/TPM1/NDEL1",3
GO:0045071,"GO:0045071","negative regulation of viral genome replication","3/649","43/11852",0.421142487471175,0.421142487471175,0.946364081323391,"CCNK/ILF3/IFITM2",3
GO:0090342,"GO:0090342","regulation of cell aging","3/649","43/11852",0.421142487471175,0.421142487471175,0.946364081323391,"HMGA1/PLK2/RSL1D1",3
GO:1901068,"GO:1901068","guanosine-containing compound metabolic process","3/649","43/11852",0.421142487471175,0.421142487471175,0.946364081323391,"IMPDH2/NME1/GUK1",3
GO:1903036,"GO:1903036","positive regulation of response to wounding","3/649","43/11852",0.421142487471175,0.421142487471175,0.946364081323391,"XBP1/THBS1/NDEL1",3
GO:0001819,"GO:0001819","positive regulation of cytokine production","17/649","290/11852",0.421542286199267,0.421542286199267,0.946364081323391,"DHX33/POLR3B/POLR3E/XBP1/C1QBP/TRAF2/ATF4/RIPK1/THBS1/DDX21/DDIT3/CRCP/HYAL2/RPS3/POLR3K/POLR3D/POLR1C",17
GO:0043401,"GO:0043401","steroid hormone mediated signaling pathway","9/649","148/11852",0.422428490193837,0.422428490193837,0.946364081323391,"DNAJA1/DDX5/CNOT1/MED1/SAFB2/SAFB/ZBTB7A/RBM14/ESRRA",9
GO:0045814,"GO:0045814","negative regulation of gene expression, epigenetic","5/649","78/11852",0.425578764918406,0.425578764918406,0.946364081323391,"ZNFX1/HMGA1/TRIM27/MBD3/POLE3",5
GO:2001237,"GO:2001237","negative regulation of extrinsic apoptotic signaling pathway","5/649","78/11852",0.425578764918406,0.425578764918406,0.946364081323391,"TNFRSF10B/TRAF2/RIPK1/THBS1/PEA15",5
GO:1901215,"GO:1901215","negative regulation of neuron death","9/649","149/11852",0.430331660612701,0.430331660612701,0.946364081323391,"TIGAR/CHMP4B/ZPR1/TRAF2/ATF4/BDNF/JUN/XRCC2/RACK1",9
GO:0000290,"GO:0000290","deadenylation-dependent decapping of nuclear-transcribed mRNA","1/649","10/11852",0.430712884830953,0.430712884830953,0.946364081323391,"NOCT",1
GO:0001675,"GO:0001675","acrosome assembly","1/649","10/11852",0.430712884830953,0.430712884830953,0.946364081323391,"RFX2",1
GO:0002934,"GO:0002934","desmosome organization","1/649","10/11852",0.430712884830953,0.430712884830953,0.946364081323391,"PKP2",1
GO:0006063,"GO:0006063","uronic acid metabolic process","1/649","10/11852",0.430712884830953,0.430712884830953,0.946364081323391,"SORD",1
GO:0006285,"GO:0006285","base-excision repair, AP site formation","1/649","10/11852",0.430712884830953,0.430712884830953,0.946364081323391,"UNG",1
GO:0006991,"GO:0006991","response to sterol depletion","1/649","10/11852",0.430712884830953,0.430712884830953,0.946364081323391,"FBXW7",1
GO:0007130,"GO:0007130","synaptonemal complex assembly","1/649","10/11852",0.430712884830953,0.430712884830953,0.946364081323391,"P3H4",1
GO:0007202,"GO:0007202","activation of phospholipase C activity","1/649","10/11852",0.430712884830953,0.430712884830953,0.946364081323391,"BDNF",1
GO:0007350,"GO:0007350","blastoderm segmentation","1/649","10/11852",0.430712884830953,0.430712884830953,0.946364081323391,"PCSK6",1
GO:0009086,"GO:0009086","methionine biosynthetic process","1/649","10/11852",0.430712884830953,0.430712884830953,0.946364081323391,"MTHFD1",1
GO:0009143,"GO:0009143","nucleoside triphosphate catabolic process","1/649","10/11852",0.430712884830953,0.430712884830953,0.946364081323391,"DCTPP1",1
GO:0009415,"GO:0009415","response to water","1/649","10/11852",0.430712884830953,0.430712884830953,0.946364081323391,"KRT8",1
GO:0010421,"GO:0010421","hydrogen peroxide-mediated programmed cell death","1/649","10/11852",0.430712884830953,0.430712884830953,0.946364081323391,"TRAP1",1
GO:0010603,"GO:0010603","regulation of cytoplasmic mRNA processing body assembly","1/649","10/11852",0.430712884830953,0.430712884830953,0.946364081323391,"CNOT1",1
GO:0010759,"GO:0010759","positive regulation of macrophage chemotaxis","1/649","10/11852",0.430712884830953,0.430712884830953,0.946364081323391,"THBS1",1
GO:0010988,"GO:0010988","regulation of low-density lipoprotein particle clearance","1/649","10/11852",0.430712884830953,0.430712884830953,0.946364081323391,"KHSRP",1
GO:0014029,"GO:0014029","neural crest formation","1/649","10/11852",0.430712884830953,0.430712884830953,0.946364081323391,"NOLC1",1
GO:0015074,"GO:0015074","DNA integration","1/649","10/11852",0.430712884830953,0.430712884830953,0.946364081323391,"SETMAR",1
GO:0019585,"GO:0019585","glucuronate metabolic process","1/649","10/11852",0.430712884830953,0.430712884830953,0.946364081323391,"SORD",1
GO:0030213,"GO:0030213","hyaluronan biosynthetic process","1/649","10/11852",0.430712884830953,0.430712884830953,0.946364081323391,"HAS3",1
GO:0030540,"GO:0030540","female genitalia development","1/649","10/11852",0.430712884830953,0.430712884830953,0.946364081323391,"CHD7",1
GO:0033127,"GO:0033127","regulation of histone phosphorylation","1/649","10/11852",0.430712884830953,0.430712884830953,0.946364081323391,"AKAP8",1
GO:0033148,"GO:0033148","positive regulation of intracellular estrogen receptor signaling pathway","1/649","10/11852",0.430712884830953,0.430712884830953,0.946364081323391,"MED1",1
GO:0033197,"GO:0033197","response to vitamin E","1/649","10/11852",0.430712884830953,0.430712884830953,0.946364081323391,"SRSF2",1
GO:0034058,"GO:0034058","endosomal vesicle fusion","1/649","10/11852",0.430712884830953,0.430712884830953,0.946364081323391,"ANKFY1",1
GO:0034350,"GO:0034350","regulation of glial cell apoptotic process","1/649","10/11852",0.430712884830953,0.430712884830953,0.946364081323391,"TRAF2",1
GO:0035437,"GO:0035437","maintenance of protein localization in endoplasmic reticulum","1/649","10/11852",0.430712884830953,0.430712884830953,0.946364081323391,"HSPA5",1
GO:0035646,"GO:0035646","endosome to melanosome transport","1/649","10/11852",0.430712884830953,0.430712884830953,0.946364081323391,"ANKRD27",1
GO:0040037,"GO:0040037","negative regulation of fibroblast growth factor receptor signaling pathway","1/649","10/11852",0.430712884830953,0.430712884830953,0.946364081323391,"THBS1",1
GO:0042271,"GO:0042271","susceptibility to natural killer cell mediated cytotoxicity","1/649","10/11852",0.430712884830953,0.430712884830953,0.946364081323391,"PVR",1
GO:0042983,"GO:0042983","amyloid precursor protein biosynthetic process","1/649","10/11852",0.430712884830953,0.430712884830953,0.946364081323391,"AATF",1
GO:0042984,"GO:0042984","regulation of amyloid precursor protein biosynthetic process","1/649","10/11852",0.430712884830953,0.430712884830953,0.946364081323391,"AATF",1
GO:0042989,"GO:0042989","sequestering of actin monomers","1/649","10/11852",0.430712884830953,0.430712884830953,0.946364081323391,"TMSB4X",1
GO:0043249,"GO:0043249","erythrocyte maturation","1/649","10/11852",0.430712884830953,0.430712884830953,0.946364081323391,"ZBTB7A",1
GO:0043455,"GO:0043455","regulation of secondary metabolic process","1/649","10/11852",0.430712884830953,0.430712884830953,0.946364081323391,"TIGAR",1
GO:0043485,"GO:0043485","endosome to pigment granule transport","1/649","10/11852",0.430712884830953,0.430712884830953,0.946364081323391,"ANKRD27",1
GO:0043508,"GO:0043508","negative regulation of JUN kinase activity","1/649","10/11852",0.430712884830953,0.430712884830953,0.946364081323391,"DNAJA1",1
GO:0043584,"GO:0043584","nose development","1/649","10/11852",0.430712884830953,0.430712884830953,0.946364081323391,"CHD7",1
GO:0043922,"GO:0043922","negative regulation by host of viral transcription","1/649","10/11852",0.430712884830953,0.430712884830953,0.946364081323391,"JUN",1
GO:0045579,"GO:0045579","positive regulation of B cell differentiation","1/649","10/11852",0.430712884830953,0.430712884830953,0.946364081323391,"XBP1",1
GO:0046040,"GO:0046040","IMP metabolic process","1/649","10/11852",0.430712884830953,0.430712884830953,0.946364081323391,"GART",1
GO:0046710,"GO:0046710","GDP metabolic process","1/649","10/11852",0.430712884830953,0.430712884830953,0.946364081323391,"GUK1",1
GO:0047484,"GO:0047484","regulation of response to osmotic stress","1/649","10/11852",0.430712884830953,0.430712884830953,0.946364081323391,"LETM1",1
GO:0048757,"GO:0048757","pigment granule maturation","1/649","10/11852",0.430712884830953,0.430712884830953,0.946364081323391,"ANKRD27",1
GO:0050862,"GO:0050862","positive regulation of T cell receptor signaling pathway","1/649","10/11852",0.430712884830953,0.430712884830953,0.946364081323391,"RPS3",1
GO:0051014,"GO:0051014","actin filament severing","1/649","10/11852",0.430712884830953,0.430712884830953,0.946364081323391,"MYH9",1
GO:0051657,"GO:0051657","maintenance of organelle location","1/649","10/11852",0.430712884830953,0.430712884830953,0.946364081323391,"SPOUT1",1
GO:0060576,"GO:0060576","intestinal epithelial cell development","1/649","10/11852",0.430712884830953,0.430712884830953,0.946364081323391,"TIGAR",1
GO:0060742,"GO:0060742","epithelial cell differentiation involved in prostate gland development","1/649","10/11852",0.430712884830953,0.430712884830953,0.946364081323391,"WDR77",1
GO:0060766,"GO:0060766","negative regulation of androgen receptor signaling pathway","1/649","10/11852",0.430712884830953,0.430712884830953,0.946364081323391,"ZBTB7A",1
GO:0060767,"GO:0060767","epithelial cell proliferation involved in prostate gland development","1/649","10/11852",0.430712884830953,0.430712884830953,0.946364081323391,"WDR77",1
GO:0060973,"GO:0060973","cell migration involved in heart development","1/649","10/11852",0.430712884830953,0.430712884830953,0.946364081323391,"SEMA3C",1
GO:0070886,"GO:0070886","positive regulation of calcineurin-NFAT signaling cascade","1/649","10/11852",0.430712884830953,0.430712884830953,0.946364081323391,"PTBP1",1
GO:0071285,"GO:0071285","cellular response to lithium ion","1/649","10/11852",0.430712884830953,0.430712884830953,0.946364081323391,"CEBPA",1
GO:0071472,"GO:0071472","cellular response to salt stress","1/649","10/11852",0.430712884830953,0.430712884830953,0.946364081323391,"LETM1",1
GO:0072079,"GO:0072079","nephron tubule formation","1/649","10/11852",0.430712884830953,0.430712884830953,0.946364081323391,"IRX3",1
GO:0072321,"GO:0072321","chaperone-mediated protein transport","1/649","10/11852",0.430712884830953,0.430712884830953,0.946364081323391,"TIMM13",1
GO:0072643,"GO:0072643","interferon-gamma secretion","1/649","10/11852",0.430712884830953,0.430712884830953,0.946364081323391,"TRIM27",1
GO:0090179,"GO:0090179","planar cell polarity pathway involved in neural tube closure","1/649","10/11852",0.430712884830953,0.430712884830953,0.946364081323391,"DVL3",1
GO:0097468,"GO:0097468","programmed cell death in response to reactive oxygen species","1/649","10/11852",0.430712884830953,0.430712884830953,0.946364081323391,"TRAP1",1
GO:0106058,"GO:0106058","positive regulation of calcineurin-mediated signaling","1/649","10/11852",0.430712884830953,0.430712884830953,0.946364081323391,"PTBP1",1
GO:0150011,"GO:0150011","regulation of neuron projection arborization","1/649","10/11852",0.430712884830953,0.430712884830953,0.946364081323391,"DVL3",1
GO:1903332,"GO:1903332","regulation of protein folding","1/649","10/11852",0.430712884830953,0.430712884830953,0.946364081323391,"HSPA5",1
GO:1990403,"GO:1990403","embryonic brain development","1/649","10/11852",0.430712884830953,0.430712884830953,0.946364081323391,"RPL10",1
GO:2001034,"GO:2001034","positive regulation of double-strand break repair via nonhomologous end joining","1/649","10/11852",0.430712884830953,0.430712884830953,0.946364081323391,"SETMAR",1
GO:2001170,"GO:2001170","negative regulation of ATP biosynthetic process","1/649","10/11852",0.430712884830953,0.430712884830953,0.946364081323391,"TIGAR",1
GO:0006970,"GO:0006970","response to osmotic stress","4/649","61/11852",0.430794323144899,0.430794323144899,0.946364081323391,"SORD/NOLC1/LETM1/TSPO",4
GO:0071260,"GO:0071260","cellular response to mechanical stimulus","4/649","61/11852",0.430794323144899,0.430794323144899,0.946364081323391,"CNN2/TNFRSF10B/MMP7/ANKRD1",4
GO:0035306,"GO:0035306","positive regulation of dephosphorylation","3/649","44/11852",0.435905252277932,0.435905252277932,0.946364081323391,"PTBP1/PPP1R15A/SYMPK",3
GO:0070534,"GO:0070534","protein K63-linked ubiquitination","3/649","44/11852",0.435905252277932,0.435905252277932,0.946364081323391,"TRAF2/UBE2O/TRIM27",3
GO:1990928,"GO:1990928","response to amino acid starvation","3/649","44/11852",0.435905252277932,0.435905252277932,0.946364081323391,"ATF4/EIF2S1/EIF4EBP1",3
GO:0035725,"GO:0035725","sodium ion transmembrane transport","5/649","79/11852",0.436497626768927,0.436497626768927,0.946364081323391,"WNK1/ACTN4/CNKSR3/SLC3A2/SLC20A2",5
GO:0090068,"GO:0090068","positive regulation of cell cycle process","14/649","239/11852",0.436834694273879,0.436834694273879,0.946364081323391,"APEX1/E2F1/CNOT1/MED1/MYBBP1A/PLK2/CDCA5/CDC25A/TFDP1/E2F4/RPL23/PRMT1/FEN1/PLRG1",14
GO:0070646,"GO:0070646","protein modification by small protein removal","15/649","257/11852",0.437509281300792,0.437509281300792,0.946364081323391,"USP36/PSME4/SART3/CLSPN/USP10/TRAF2/RIPK1/CDC25A/OTUD4/RUVBL1/EPOP/ACTR5/PSMA5/TNIP2/UBA52",15
GO:0070555,"GO:0070555","response to interleukin-1","9/649","150/11852",0.438226516558131,0.438226516558131,0.946364081323391,"CUL1/PSME4/USP10/ANKRD1/OTUD4/HYAL2/PSMA5/TNIP2/UBA52",9
GO:0002762,"GO:0002762","negative regulation of myeloid leukocyte differentiation","2/649","27/11852",0.439645164415251,0.439645164415251,0.946364081323391,"NME1/FBXW7",2
GO:0006515,"GO:0006515","protein quality control for misfolded or incompletely synthesized proteins","2/649","27/11852",0.439645164415251,0.439645164415251,0.946364081323391,"SDF2L1/LONP1",2
GO:0030225,"GO:0030225","macrophage differentiation","2/649","27/11852",0.439645164415251,0.439645164415251,0.946364081323391,"RIPK1/CEBPA",2
GO:0030970,"GO:0030970","retrograde protein transport, ER to cytosol","2/649","27/11852",0.439645164415251,0.439645164415251,0.946364081323391,"HM13/UBE2G2",2
GO:0032728,"GO:0032728","positive regulation of interferon-beta production","2/649","27/11852",0.439645164415251,0.439645164415251,0.946364081323391,"POLR3B/POLR3D",2
GO:0034383,"GO:0034383","low-density lipoprotein particle clearance","2/649","27/11852",0.439645164415251,0.439645164415251,0.946364081323391,"SCARB1/KHSRP",2
GO:0042168,"GO:0042168","heme metabolic process","2/649","27/11852",0.439645164415251,0.439645164415251,0.946364081323391,"SLC25A38/TSPO",2
GO:0043268,"GO:0043268","positive regulation of potassium ion transport","2/649","27/11852",0.439645164415251,0.439645164415251,0.946364081323391,"WNK1/FLNA",2
GO:0046621,"GO:0046621","negative regulation of organ growth","2/649","27/11852",0.439645164415251,0.439645164415251,0.946364081323391,"WWC1/RIPK1",2
GO:0050856,"GO:0050856","regulation of T cell receptor signaling pathway","2/649","27/11852",0.439645164415251,0.439645164415251,0.946364081323391,"EZR/RPS3",2
GO:0051154,"GO:0051154","negative regulation of striated muscle cell differentiation","2/649","27/11852",0.439645164415251,0.439645164415251,0.946364081323391,"XBP1/BDNF",2
GO:0061099,"GO:0061099","negative regulation of protein tyrosine kinase activity","2/649","27/11852",0.439645164415251,0.439645164415251,0.946364081323391,"HYAL2/RACK1",2
GO:0071276,"GO:0071276","cellular response to cadmium ion","2/649","27/11852",0.439645164415251,0.439645164415251,0.946364081323391,"JUN/MT1E",2
GO:0072529,"GO:0072529","pyrimidine-containing compound catabolic process","2/649","27/11852",0.439645164415251,0.439645164415251,0.946364081323391,"UNG/DCTPP1",2
GO:0090169,"GO:0090169","regulation of spindle assembly","2/649","27/11852",0.439645164415251,0.439645164415251,0.946364081323391,"CHMP4B/DRG1",2
GO:1903513,"GO:1903513","endoplasmic reticulum to cytosol transport","2/649","27/11852",0.439645164415251,0.439645164415251,0.946364081323391,"HM13/UBE2G2",2
GO:1904707,"GO:1904707","positive regulation of vascular smooth muscle cell proliferation","2/649","27/11852",0.439645164415251,0.439645164415251,0.946364081323391,"MEF2D/JUN",2
GO:0071407,"GO:0071407","cellular response to organic cyclic compound","23/649","401/11852",0.439808761253656,0.439808761253656,0.946364081323391,"TNC/HSPA5/DNAJA1/DDX18/EZR/APEX1/DDX5/CNOT1/MED1/ZFP36/ATF4/BCL2L2/SAFB2/MSN/ANKRD1/EPG5/SAFB/ZBTB7A/EIF4EBP1/RBM14/GNAI1/ESRRA/CEBPA",23
GO:1902532,"GO:1902532","negative regulation of intracellular signal transduction","24/649","419/11852",0.4398650598585,0.4398650598585,0.946364081323391,"PLAUR/PHLPP2/DNAJA1/EZR/XBP1/USP10/EIF3A/PPIF/C1QBP/WWC1/BCL2L2/AJUBA/RIPK1/THBS1/DUSP5/CNKSR3/CCAR2/DDIT3/HYAL2/RRN3/TRAP1/PTTG1IP/RACK1/TMSB4X",24
GO:0008643,"GO:0008643","carbohydrate transport","6/649","97/11852",0.44023391081867,0.44023391081867,0.946364081323391,"EZR/HK2/PEA15/FABP5/MFSD2A/IRS1",6
GO:0071479,"GO:0071479","cellular response to ionizing radiation","4/649","62/11852",0.443172889767171,0.443172889767171,0.946364081323391,"HSPA5/INTS7/EEF1D/POLE3",4
GO:0021915,"GO:0021915","neural tube development","8/649","133/11852",0.444715939243711,0.444715939243711,0.946364081323391,"SEMA3C/MTHFD1/MTHFD1L/ADM/DVL3/PHGDH/SDC4/RPS7",8
GO:0042113,"GO:0042113","B cell activation","9/649","151/11852",0.446110045839421,0.446110045839421,0.946364081323391,"UNG/CDH17/XBP1/SUPT6H/MSH6/CTPS1/ZBTB7A/CMTM7/TNIP2",9
GO:0034446,"GO:0034446","substrate adhesion-dependent cell spreading","5/649","80/11852",0.447369695705445,0.447369695705445,0.946364081323391,"ARHGEF7/C1QBP/CORO1C/ACTN4/FLNA",5
GO:0006892,"GO:0006892","post-Golgi vesicle-mediated transport","6/649","98/11852",0.450044674801427,0.450044674801427,0.946364081323391,"GGA2/CCDC93/SEC16A/ANKFY1/KRT18/RACK1",6
GO:0007187,"GO:0007187","G protein-coupled receptor signaling pathway, coupled to cyclic nucleotide second messenger","6/649","98/11852",0.450044674801427,0.450044674801427,0.946364081323391,"ADGRL1/PRMT5/ADM/CACNA1D/FLNA/GNAI1",6
GO:0043534,"GO:0043534","blood vessel endothelial cell migration","6/649","98/11852",0.450044674801427,0.450044674801427,0.946364081323391,"SCARB1/MYH9/THBS1/PLK2/FBXW7/TMSB4X",6
GO:0071706,"GO:0071706","tumor necrosis factor superfamily cytokine production","6/649","98/11852",0.450044674801427,0.450044674801427,0.946364081323391,"AKAP8/ZFP36/RIPK1/THBS1/TRIM27/TSPO",6
GO:0022600,"GO:0022600","digestive system process","3/649","45/11852",0.450524895042346,0.450524895042346,0.946364081323391,"WNK1/SCARB1/EZR",3
GO:0043954,"GO:0043954","cellular component maintenance","3/649","45/11852",0.450524895042346,0.450524895042346,0.946364081323391,"PKP2/SUPT6H/SUPV3L1",3
GO:0051148,"GO:0051148","negative regulation of muscle cell differentiation","3/649","45/11852",0.450524895042346,0.450524895042346,0.946364081323391,"PTBP1/XBP1/BDNF",3
GO:0051972,"GO:0051972","regulation of telomerase activity","3/649","45/11852",0.450524895042346,0.450524895042346,0.946364081323391,"MAP3K4/DKC1/PINX1",3
GO:0016125,"GO:0016125","sterol metabolic process","7/649","116/11852",0.451846346780676,0.451846346780676,0.946364081323391,"NFYA/SCARB1/KPNB1/DHCR7/ACLY/PMVK/CEBPA",7
GO:0033500,"GO:0033500","carbohydrate homeostasis","10/649","170/11852",0.454599957331299,0.454599957331299,0.946364081323391,"XBP1/TWNK/SYBU/HK2/FABP5/NME1/IRS1/RPS6/RACK1/CEBPA",10
GO:0042593,"GO:0042593","glucose homeostasis","10/649","170/11852",0.454599957331299,0.454599957331299,0.946364081323391,"XBP1/TWNK/SYBU/HK2/FABP5/NME1/IRS1/RPS6/RACK1/CEBPA",10
GO:1901990,"GO:1901990","regulation of mitotic cell cycle phase transition","22/649","386/11852",0.454610110082769,0.454610110082769,0.946364081323391,"ZNF207/CUL1/PSME4/ORC1/CLSPN/APEX1/E2F1/CNOT1/RIPK1/PLK2/CDCA5/CDC25A/BRD7/TFDP1/E2F4/PINX1/RPA2/PRMT1/HAUS2/PSMA5/PLRG1/HAUS7",22
GO:0097306,"GO:0097306","cellular response to alcohol","4/649","63/11852",0.455469242249629,0.455469242249629,0.946364081323391,"TNC/AKAP8/LANCL2/GNAI1",4
GO:0042775,"GO:0042775","mitochondrial ATP synthesis coupled electron transport","5/649","81/11852",0.458187906904685,0.458187906904685,0.946364081323391,"AFG1L/UQCRB/NDUFB11/NDUFB9/UQCC3",5
GO:0000132,"GO:0000132","establishment of mitotic spindle orientation","2/649","28/11852",0.458393535665557,0.458393535665557,0.946364081323391,"BCCIP/NDEL1",2
GO:0001974,"GO:0001974","blood vessel remodeling","2/649","28/11852",0.458393535665557,0.458393535665557,0.946364081323391,"SEMA3C/CHD7",2
GO:0002920,"GO:0002920","regulation of humoral immune response","2/649","28/11852",0.458393535665557,0.458393535665557,0.946364081323391,"C1QBP/SUSD4",2
GO:0006294,"GO:0006294","nucleotide-excision repair, preincision complex assembly","2/649","28/11852",0.458393535665557,0.458393535665557,0.946364081323391,"RPA2/UBA52",2
GO:0030262,"GO:0030262","apoptotic nuclear changes","2/649","28/11852",0.458393535665557,0.458393535665557,0.946364081323391,"ACIN1/KPNB1",2
GO:0042181,"GO:0042181","ketone biosynthetic process","2/649","28/11852",0.458393535665557,0.458393535665557,0.946364081323391,"UBIAD1/ADM",2
GO:0043094,"GO:0043094","cellular metabolic compound salvage","2/649","28/11852",0.458393535665557,0.458393535665557,0.946364081323391,"UCK2/PNP",2
GO:0046039,"GO:0046039","GTP metabolic process","2/649","28/11852",0.458393535665557,0.458393535665557,0.946364081323391,"IMPDH2/NME1",2
GO:0046460,"GO:0046460","neutral lipid biosynthetic process","2/649","28/11852",0.458393535665557,0.458393535665557,0.946364081323391,"SCARB1/FBXW7",2
GO:0046463,"GO:0046463","acylglycerol biosynthetic process","2/649","28/11852",0.458393535665557,0.458393535665557,0.946364081323391,"SCARB1/FBXW7",2
GO:0046688,"GO:0046688","response to copper ion","2/649","28/11852",0.458393535665557,0.458393535665557,0.946364081323391,"SORD/MT1E",2
GO:0048713,"GO:0048713","regulation of oligodendrocyte differentiation","2/649","28/11852",0.458393535665557,0.458393535665557,0.946364081323391,"WDR1/PRMT5",2
GO:0071622,"GO:0071622","regulation of granulocyte chemotaxis","2/649","28/11852",0.458393535665557,0.458393535665557,0.946364081323391,"C1QBP/THBS1",2
GO:0090200,"GO:0090200","positive regulation of release of cytochrome c from mitochondria","2/649","28/11852",0.458393535665557,0.458393535665557,0.946364081323391,"PLAUR/PPIF",2
GO:1902235,"GO:1902235","regulation of endoplasmic reticulum stress-induced intrinsic apoptotic signaling pathway","2/649","28/11852",0.458393535665557,0.458393535665557,0.946364081323391,"XBP1/DDIT3",2
GO:0022904,"GO:0022904","respiratory electron transport chain","6/649","99/11852",0.45981734890735,0.45981734890735,0.946364081323391,"MYBBP1A/AFG1L/UQCRB/NDUFB11/NDUFB9/UQCC3",6
GO:0000280,"GO:0000280","nuclear division","19/649","333/11852",0.460550221321594,0.460550221321594,0.946364081323391,"ZNF207/RAD54L/PRMT5/CHMP4B/AKAP8/BCCIP/KPNB1/RPL24/PSMC3IP/CDCA5/NDEL1/RRS1/RCC1/FLNA/PINX1/CCNB1IP1/WRAP73/P3H4/DRG1",19
GO:0090316,"GO:0090316","positive regulation of intracellular protein transport","8/649","135/11852",0.46145783488222,0.46145783488222,0.946364081323391,"USP36/HUWE1/MIEF1/ZPR1/SEC16A/FLNA/HYAL2/FBXW7",8
GO:0010810,"GO:0010810","regulation of cell-substrate adhesion","9/649","153/11852",0.461831345421234,0.461831345421234,0.946364081323391,"ARHGEF7/C1QBP/CORO1C/PLAU/ACTN4/THBS1/FLNA/NID1/SDC4",9
GO:0001682,"GO:0001682","tRNA 5'-leader removal","1/649","11/11852",0.461912626238208,0.461912626238208,0.946364081323391,"POP1",1
GO:0001829,"GO:0001829","trophectodermal cell differentiation","1/649","11/11852",0.461912626238208,0.461912626238208,0.946364081323391,"BYSL",1
GO:0002730,"GO:0002730","regulation of dendritic cell cytokine production","1/649","11/11852",0.461912626238208,0.461912626238208,0.946364081323391,"DDX21",1
GO:0003334,"GO:0003334","keratinocyte development","1/649","11/11852",0.461912626238208,0.461912626238208,0.946364081323391,"FLNB",1
GO:0006020,"GO:0006020","inositol metabolic process","1/649","11/11852",0.461912626238208,0.461912626238208,0.946364081323391,"IPPK",1
GO:0006465,"GO:0006465","signal peptide processing","1/649","11/11852",0.461912626238208,0.461912626238208,0.946364081323391,"HM13",1
GO:0006563,"GO:0006563","L-serine metabolic process","1/649","11/11852",0.461912626238208,0.461912626238208,0.946364081323391,"PHGDH",1
GO:0009151,"GO:0009151","purine deoxyribonucleotide metabolic process","1/649","11/11852",0.461912626238208,0.461912626238208,0.946364081323391,"GUK1",1
GO:0009265,"GO:0009265","2'-deoxyribonucleotide biosynthetic process","1/649","11/11852",0.461912626238208,0.461912626238208,0.946364081323391,"GUK1",1
GO:0010561,"GO:0010561","negative regulation of glycoprotein biosynthetic process","1/649","11/11852",0.461912626238208,0.461912626238208,0.946364081323391,"AATF",1
GO:0010566,"GO:0010566","regulation of ketone biosynthetic process","1/649","11/11852",0.461912626238208,0.461912626238208,0.946364081323391,"ADM",1
GO:0010755,"GO:0010755","regulation of plasminogen activation","1/649","11/11852",0.461912626238208,0.461912626238208,0.946364081323391,"THBS1",1
GO:0010867,"GO:0010867","positive regulation of triglyceride biosynthetic process","1/649","11/11852",0.461912626238208,0.461912626238208,0.946364081323391,"SCARB1",1
GO:0010884,"GO:0010884","positive regulation of lipid storage","1/649","11/11852",0.461912626238208,0.461912626238208,0.946364081323391,"SCARB1",1
GO:0010885,"GO:0010885","regulation of cholesterol storage","1/649","11/11852",0.461912626238208,0.461912626238208,0.946364081323391,"SCARB1",1
GO:0018206,"GO:0018206","peptidyl-methionine modification","1/649","11/11852",0.461912626238208,0.461912626238208,0.946364081323391,"NAA25",1
GO:0019042,"GO:0019042","viral latency","1/649","11/11852",0.461912626238208,0.461912626238208,0.946364081323391,"HMGA1",1
GO:0019896,"GO:0019896","axonal transport of mitochondrion","1/649","11/11852",0.461912626238208,0.461912626238208,0.946364081323391,"SYBU",1
GO:0030809,"GO:0030809","negative regulation of nucleotide biosynthetic process","1/649","11/11852",0.461912626238208,0.461912626238208,0.946364081323391,"TIGAR",1
GO:0030836,"GO:0030836","positive regulation of actin filament depolymerization","1/649","11/11852",0.461912626238208,0.461912626238208,0.946364081323391,"WDR1",1
GO:0030950,"GO:0030950","establishment or maintenance of actin cytoskeleton polarity","1/649","11/11852",0.461912626238208,0.461912626238208,0.946364081323391,"RND3",1
GO:0031272,"GO:0031272","regulation of pseudopodium assembly","1/649","11/11852",0.461912626238208,0.461912626238208,0.946364081323391,"CDC42EP2",1
GO:0031274,"GO:0031274","positive regulation of pseudopodium assembly","1/649","11/11852",0.461912626238208,0.461912626238208,0.946364081323391,"CDC42EP2",1
GO:0032026,"GO:0032026","response to magnesium ion","1/649","11/11852",0.461912626238208,0.461912626238208,0.946364081323391,"THBS1",1
GO:0032530,"GO:0032530","regulation of microvillus organization","1/649","11/11852",0.461912626238208,0.461912626238208,0.946364081323391,"EZR",1
GO:0032780,"GO:0032780","negative regulation of ATPase activity","1/649","11/11852",0.461912626238208,0.461912626238208,0.946364081323391,"PPIF",1
GO:0034331,"GO:0034331","cell junction maintenance","1/649","11/11852",0.461912626238208,0.461912626238208,0.946364081323391,"PKP2",1
GO:0034368,"GO:0034368","protein-lipid complex remodeling","1/649","11/11852",0.461912626238208,0.461912626238208,0.946364081323391,"SCARB1",1
GO:0034369,"GO:0034369","plasma lipoprotein particle remodeling","1/649","11/11852",0.461912626238208,0.461912626238208,0.946364081323391,"SCARB1",1
GO:0034497,"GO:0034497","protein localization to phagophore assembly site","1/649","11/11852",0.461912626238208,0.461912626238208,0.946364081323391,"WDR45B",1
GO:0035435,"GO:0035435","phosphate ion transmembrane transport","1/649","11/11852",0.461912626238208,0.461912626238208,0.946364081323391,"SLC20A2",1
GO:0039532,"GO:0039532","negative regulation of viral-induced cytoplasmic pattern recognition receptor signaling pathway","1/649","11/11852",0.461912626238208,0.461912626238208,0.946364081323391,"C1QBP",1
GO:0040015,"GO:0040015","negative regulation of multicellular organism growth","1/649","11/11852",0.461912626238208,0.461912626238208,0.946364081323391,"PLAC8",1
GO:0042044,"GO:0042044","fluid transport","1/649","11/11852",0.461912626238208,0.461912626238208,0.946364081323391,"HYAL2",1
GO:0042362,"GO:0042362","fat-soluble vitamin biosynthetic process","1/649","11/11852",0.461912626238208,0.461912626238208,0.946364081323391,"UBIAD1",1
GO:0043173,"GO:0043173","nucleotide salvage","1/649","11/11852",0.461912626238208,0.461912626238208,0.946364081323391,"UCK2",1
GO:0043518,"GO:0043518","negative regulation of DNA damage response, signal transduction by p53 class mediator","1/649","11/11852",0.461912626238208,0.461912626238208,0.946364081323391,"PTTG1IP",1
GO:0045618,"GO:0045618","positive regulation of keratinocyte differentiation","1/649","11/11852",0.461912626238208,0.461912626238208,0.946364081323391,"MED1",1
GO:0045651,"GO:0045651","positive regulation of macrophage differentiation","1/649","11/11852",0.461912626238208,0.461912626238208,0.946364081323391,"RIPK1",1
GO:0045722,"GO:0045722","positive regulation of gluconeogenesis","1/649","11/11852",0.461912626238208,0.461912626238208,0.946364081323391,"WDR5",1
GO:0046033,"GO:0046033","AMP metabolic process","1/649","11/11852",0.461912626238208,0.461912626238208,0.946364081323391,"AK2",1
GO:0046321,"GO:0046321","positive regulation of fatty acid oxidation","1/649","11/11852",0.461912626238208,0.461912626238208,0.946364081323391,"IRS1",1
GO:0046385,"GO:0046385","deoxyribose phosphate biosynthetic process","1/649","11/11852",0.461912626238208,0.461912626238208,0.946364081323391,"GUK1",1
GO:0048532,"GO:0048532","anatomical structure arrangement","1/649","11/11852",0.461912626238208,0.461912626238208,0.946364081323391,"HSPA5",1
GO:0060044,"GO:0060044","negative regulation of cardiac muscle cell proliferation","1/649","11/11852",0.461912626238208,0.461912626238208,0.946364081323391,"RIPK1",1
GO:0060253,"GO:0060253","negative regulation of glial cell proliferation","1/649","11/11852",0.461912626238208,0.461912626238208,0.946364081323391,"TSPO",1
GO:0060339,"GO:0060339","negative regulation of type I interferon-mediated signaling pathway","1/649","11/11852",0.461912626238208,0.461912626238208,0.946364081323391,"METTL3",1
GO:0060841,"GO:0060841","venous blood vessel development","1/649","11/11852",0.461912626238208,0.461912626238208,0.946364081323391,"SEMA3C",1
GO:0061687,"GO:0061687","detoxification of inorganic compound","1/649","11/11852",0.461912626238208,0.461912626238208,0.946364081323391,"MT1E",1
GO:0071340,"GO:0071340","skeletal muscle acetylcholine-gated channel clustering","1/649","11/11852",0.461912626238208,0.461912626238208,0.946364081323391,"DNAJA3",1
GO:0071636,"GO:0071636","positive regulation of transforming growth factor beta production","1/649","11/11852",0.461912626238208,0.461912626238208,0.946364081323391,"THBS1",1
GO:0071732,"GO:0071732","cellular response to nitric oxide","1/649","11/11852",0.461912626238208,0.461912626238208,0.946364081323391,"TRAF2",1
GO:0071801,"GO:0071801","regulation of podosome assembly","1/649","11/11852",0.461912626238208,0.461912626238208,0.946364081323391,"MSN",1
GO:0086014,"GO:0086014","atrial cardiac muscle cell action potential","1/649","11/11852",0.461912626238208,0.461912626238208,0.946364081323391,"FLNA",1
GO:0086026,"GO:0086026","atrial cardiac muscle cell to AV node cell signaling","1/649","11/11852",0.461912626238208,0.461912626238208,0.946364081323391,"FLNA",1
GO:0086066,"GO:0086066","atrial cardiac muscle cell to AV node cell communication","1/649","11/11852",0.461912626238208,0.461912626238208,0.946364081323391,"FLNA",1
GO:0090073,"GO:0090073","positive regulation of protein homodimerization activity","1/649","11/11852",0.461912626238208,0.461912626238208,0.946364081323391,"TRAF2",1
GO:0090141,"GO:0090141","positive regulation of mitochondrial fission","1/649","11/11852",0.461912626238208,0.461912626238208,0.946364081323391,"MIEF1",1
GO:0090178,"GO:0090178","regulation of establishment of planar polarity involved in neural tube closure","1/649","11/11852",0.461912626238208,0.461912626238208,0.946364081323391,"DVL3",1
GO:0099170,"GO:0099170","postsynaptic modulation of chemical synaptic transmission","1/649","11/11852",0.461912626238208,0.461912626238208,0.946364081323391,"EIF4A3",1
GO:1900119,"GO:1900119","positive regulation of execution phase of apoptosis","1/649","11/11852",0.461912626238208,0.461912626238208,0.946364081323391,"RPS3",1
GO:1900372,"GO:1900372","negative regulation of purine nucleotide biosynthetic process","1/649","11/11852",0.461912626238208,0.461912626238208,0.946364081323391,"TIGAR",1
GO:1900402,"GO:1900402","regulation of carbohydrate metabolic process by regulation of transcription from RNA polymerase II promoter","1/649","11/11852",0.461912626238208,0.461912626238208,0.946364081323391,"WDR5",1
GO:1902018,"GO:1902018","negative regulation of cilium assembly","1/649","11/11852",0.461912626238208,0.461912626238208,0.946364081323391,"TBC1D30",1
GO:1902855,"GO:1902855","regulation of non-motile cilium assembly","1/649","11/11852",0.461912626238208,0.461912626238208,0.946364081323391,"WRAP73",1
GO:1903010,"GO:1903010","regulation of bone development","1/649","11/11852",0.461912626238208,0.461912626238208,0.946364081323391,"FBXW7",1
GO:1904925,"GO:1904925","positive regulation of autophagy of mitochondrion in response to mitochondrial depolarization","1/649","11/11852",0.461912626238208,0.461912626238208,0.946364081323391,"HK2",1
GO:2000774,"GO:2000774","positive regulation of cellular senescence","1/649","11/11852",0.461912626238208,0.461912626238208,0.946364081323391,"HMGA1",1
GO:0008202,"GO:0008202","steroid metabolic process","12/649","207/11852",0.462070019620058,0.462070019620058,0.946364081323391,"NFYA/SCARB1/KPNB1/MED1/ADM/SF1/DHCR7/TSPO/ACLY/PMVK/IGFBP7/CEBPA",12
GO:0006809,"GO:0006809","nitric oxide biosynthetic process","3/649","46/11852",0.464987428069095,0.464987428069095,0.946364081323391,"KHSRP/DDAH1/TSPO",3
GO:0010812,"GO:0010812","negative regulation of cell-substrate adhesion","3/649","46/11852",0.464987428069095,0.464987428069095,0.946364081323391,"CORO1C/ACTN4/THBS1",3
GO:0014910,"GO:0014910","regulation of smooth muscle cell migration","3/649","46/11852",0.464987428069095,0.464987428069095,0.946364081323391,"APEX1/PLAU/TPM1",3
GO:0021675,"GO:0021675","nerve development","3/649","46/11852",0.464987428069095,0.464987428069095,0.946364081323391,"RPL24/CHD7/BDNF",3
GO:0032233,"GO:0032233","positive regulation of actin filament bundle assembly","3/649","46/11852",0.464987428069095,0.464987428069095,0.946364081323391,"TPM1/FLNA/SDC4",3
GO:0060760,"GO:0060760","positive regulation of response to cytokine stimulus","3/649","46/11852",0.464987428069095,0.464987428069095,0.946364081323391,"MED1/TRAF2/RIPK1",3
GO:0061045,"GO:0061045","negative regulation of wound healing","3/649","46/11852",0.464987428069095,0.464987428069095,0.946364081323391,"PLAUR/PLAU/THBS1",3
GO:0086003,"GO:0086003","cardiac muscle cell contraction","3/649","46/11852",0.464987428069095,0.464987428069095,0.946364081323391,"PKP2/CACNA1D/FLNA",3
GO:1901616,"GO:1901616","organic hydroxy compound catabolic process","3/649","46/11852",0.464987428069095,0.464987428069095,0.946364081323391,"SCARB1/ALDH1B1/SORD",3
GO:1902305,"GO:1902305","regulation of sodium ion transmembrane transport","3/649","46/11852",0.464987428069095,0.464987428069095,0.946364081323391,"WNK1/ACTN4/CNKSR3",3
GO:2000059,"GO:2000059","negative regulation of ubiquitin-dependent protein catabolic process","3/649","46/11852",0.464987428069095,0.464987428069095,0.946364081323391,"CCAR2/RPL23/RPS7",3
GO:0006303,"GO:0006303","double-strand break repair via nonhomologous end joining","4/649","64/11852",0.467674016163256,0.467674016163256,0.946364081323391,"LIG3/ZBTB7A/AUNIP/SETMAR",4
GO:1902117,"GO:1902117","positive regulation of organelle assembly","4/649","64/11852",0.467674016163256,0.467674016163256,0.946364081323391,"CNOT1/MSN/WRAP73/SDC4",4
GO:1903051,"GO:1903051","negative regulation of proteolysis involved in cellular protein catabolic process","4/649","64/11852",0.467674016163256,0.467674016163256,0.946364081323391,"CCAR2/RPL23/RPS7/UBE2G2",4
GO:0010038,"GO:0010038","response to metal ion","14/649","244/11852",0.468048431498482,0.468048431498482,0.946364081323391,"HSPA5/WNK1/TIGAR/PPIF/ATF4/EIF2S1/THBS1/SORD/JUN/MT1E/TSPO/CA2/LONP1/CEBPA",14
GO:0042773,"GO:0042773","ATP synthesis coupled electron transport","5/649","82/11852",0.468945484262564,0.468945484262564,0.946364081323391,"AFG1L/UQCRB/NDUFB11/NDUFB9/UQCC3",5
GO:0019079,"GO:0019079","viral genome replication","6/649","100/11852",0.4695467493885,0.4695467493885,0.946364081323391,"CCNK/DDX5/ILF3/PCBP1/IFITM2/PPIE",6
GO:0043270,"GO:0043270","positive regulation of ion transport","9/649","154/11852",0.469663367707293,0.469663367707293,0.946364081323391,"PKP2/WNK1/ATF4/ACTN4/CNKSR3/CACNA1D/FLNA/TSPO/TMSB4X",9
GO:0046651,"GO:0046651","lymphocyte proliferation","9/649","154/11852",0.469663367707293,0.469663367707293,0.946364081323391,"ELF4/DNAJA3/MSN/CTPS1/IMPDH2/PNP/SDC4/RPS6/RPS3",9
GO:2001252,"GO:2001252","positive regulation of chromosome organization","9/649","154/11852",0.469663367707293,0.469663367707293,0.946364081323391,"SART3/MAP3K4/AKAP8/DKC1/JDP2/GNL3/BRD7/CCT6A/FEN1",9
GO:1903322,"GO:1903322","positive regulation of protein modification by small protein conjugation or removal","7/649","118/11852",0.469780345099718,0.469780345099718,0.946364081323391,"HSPA5/SART3/HUWE1/UBE2I/GNL3/FBXW7/PTTG1IP",7
GO:2001236,"GO:2001236","regulation of extrinsic apoptotic signaling pathway","7/649","118/11852",0.469780345099718,0.469780345099718,0.946364081323391,"TNFRSF10B/TRAF2/RIPK1/THBS1/PEA15/TNFRSF12A/HYAL2",7
GO:2001251,"GO:2001251","negative regulation of chromosome organization","7/649","118/11852",0.469780345099718,0.469780345099718,0.946364081323391,"ZNF207/MCM2/SUPT6H/NAT10/HMGA1/PINX1/SETMAR",7
GO:0051606,"GO:0051606","detection of stimulus","8/649","136/11852",0.469792716825252,0.469792716825252,0.946364081323391,"SCARB1/POLD3/DNAJA1/MRPS26/RPA2/MRPS9/RPS3/UBA52",8
GO:0035690,"GO:0035690","cellular response to drug","15/649","263/11852",0.473642777380453,0.473642777380453,0.946364081323391,"HSPA5/CAD/APEX1/PPIF/UMPS/TRAF2/ATF4/RIPK1/EIF4EBP1/NME1/GNAI1/TRAP1/RPS3/PYCR1/RACK1",15
GO:0031098,"GO:0031098","stress-activated protein kinase signaling cascade","14/649","245/11852",0.474268948433177,0.474268948433177,0.946364081323391,"CUL1/MAP3K4/DNAJA1/EZR/TRAF2/ZFP36/RIPK1/DVL3/ERCC6/PRMT1/RPS3/TNIP2/ZNF622/UBA52",14
GO:0008544,"GO:0008544","epidermis development","13/649","227/11852",0.474902551166703,0.474902551166703,0.946364081323391,"NSUN2/PKP2/MED1/ZFP36/FLNB/PCSK6/NOM1/FABP5/KRT8/TFDP1/KRT18/COL7A1/NAB2",13
GO:0032868,"GO:0032868","response to insulin","12/649","209/11852",0.475542446157911,0.475542446157911,0.946364081323391,"PKM/CAD/XBP1/SRSF4/ATP6V1C2/ADM/NDEL1/EIF4EBP1/IRS1/ATP6V1B2/ESRRA/EIF6",12
GO:0034329,"GO:0034329","cell junction assembly","11/649","191/11852",0.476186667971495,0.476186667971495,0.946364081323391,"PKP2/WDR1/CDH17/ARHGEF7/CORO1C/AJUBA/ACTN4/THBS1/ACTG1/FLNA/SDC4",11
GO:0000768,"GO:0000768","syncytium formation by plasma membrane fusion","2/649","29/11852",0.476772398721898,0.476772398721898,0.946364081323391,"MYH9/MYOF",2
GO:0001953,"GO:0001953","negative regulation of cell-matrix adhesion","2/649","29/11852",0.476772398721898,0.476772398721898,0.946364081323391,"CORO1C/THBS1",2
GO:0002756,"GO:0002756","MyD88-independent toll-like receptor signaling pathway","2/649","29/11852",0.476772398721898,0.476772398721898,0.946364081323391,"RIPK1/UBA52",2
GO:0003254,"GO:0003254","regulation of membrane depolarization","2/649","29/11852",0.476772398721898,0.476772398721898,0.946364081323391,"TSPO/RACK1",2
GO:0003382,"GO:0003382","epithelial cell morphogenesis","2/649","29/11852",0.476772398721898,0.476772398721898,0.946364081323391,"FLNB/FRMD6",2
GO:0010677,"GO:0010677","negative regulation of cellular carbohydrate metabolic process","2/649","29/11852",0.476772398721898,0.476772398721898,0.946364081323391,"TIGAR/COX11",2
GO:0010907,"GO:0010907","positive regulation of glucose metabolic process","2/649","29/11852",0.476772398721898,0.476772398721898,0.946364081323391,"IRS1/WDR5",2
GO:0010955,"GO:0010955","negative regulation of protein processing","2/649","29/11852",0.476772398721898,0.476772398721898,0.946364081323391,"THBS1/CHAC1",2
GO:0031112,"GO:0031112","positive regulation of microtubule polymerization or depolymerization","2/649","29/11852",0.476772398721898,0.476772398721898,0.946364081323391,"RPS3/DRG1",2
GO:0042304,"GO:0042304","regulation of fatty acid biosynthetic process","2/649","29/11852",0.476772398721898,0.476772398721898,0.946364081323391,"FABP5/EIF6",2
GO:0043039,"GO:0043039","tRNA aminoacylation","2/649","29/11852",0.476772398721898,0.476772398721898,0.946364081323391,"GATC/YARS2",2
GO:0043277,"GO:0043277","apoptotic cell clearance","2/649","29/11852",0.476772398721898,0.476772398721898,0.946364081323391,"SCARB1/THBS1",2
GO:0044818,"GO:0044818","mitotic G2/M transition checkpoint","2/649","29/11852",0.476772398721898,0.476772398721898,0.946364081323391,"ORC1/CLSPN",2
GO:0045143,"GO:0045143","homologous chromosome segregation","2/649","29/11852",0.476772398721898,0.476772398721898,0.946364081323391,"CCNB1IP1/P3H4",2
GO:0045616,"GO:0045616","regulation of keratinocyte differentiation","2/649","29/11852",0.476772398721898,0.476772398721898,0.946364081323391,"MED1/ZFP36",2
GO:0048662,"GO:0048662","negative regulation of smooth muscle cell proliferation","2/649","29/11852",0.476772398721898,0.476772398721898,0.946364081323391,"TPM1/SF1",2
GO:0140253,"GO:0140253","cell-cell fusion","2/649","29/11852",0.476772398721898,0.476772398721898,0.946364081323391,"MYH9/MYOF",2
GO:1903318,"GO:1903318","negative regulation of protein maturation","2/649","29/11852",0.476772398721898,0.476772398721898,0.946364081323391,"THBS1/CHAC1",2
GO:0050792,"GO:0050792","regulation of viral process","10/649","173/11852",0.476831903332698,0.476831903332698,0.946364081323391,"CCNK/CHMP4B/TRIM35/DDX5/ZFP36/ILF3/JUN/IFITM2/TRIM27/PPIE",10
GO:0016331,"GO:0016331","morphogenesis of embryonic epithelium","7/649","119/11852",0.478694672512771,0.478694672512771,0.946364081323391,"MTHFD1/MTHFD1L/ADM/DVL3/IRX3/SDC4/RPS7",7
GO:0031960,"GO:0031960","response to corticosteroid","6/649","101/11852",0.479227870626102,0.479227870626102,0.946364081323391,"CAD/ZFP36/ADM/FOSL1/EIF4EBP1/IGFBP7",6
GO:0071774,"GO:0071774","response to fibroblast growth factor","6/649","101/11852",0.479227870626102,0.479227870626102,0.946364081323391,"PTBP1/TNC/ZFP36/THBS1/HYAL2/IER2",6
GO:0000186,"GO:0000186","activation of MAPKK activity","3/649","47/11852",0.479280018036084,0.479280018036084,0.946364081323391,"MAP3K4/RIPK1/ERCC6",3
GO:0001756,"GO:0001756","somitogenesis","3/649","47/11852",0.479280018036084,0.479280018036084,0.946364081323391,"NLE1/SEMA3C/XRCC2",3
GO:0002562,"GO:0002562","somatic diversification of immune receptors via germline recombination within a single locus","3/649","47/11852",0.479280018036084,0.479280018036084,0.946364081323391,"UNG/SUPT6H/MSH6",3
GO:0009066,"GO:0009066","aspartate family amino acid metabolic process","3/649","47/11852",0.479280018036084,0.479280018036084,0.946364081323391,"MTHFD1/OGDH/PHGDH",3
GO:0016444,"GO:0016444","somatic cell DNA recombination","3/649","47/11852",0.479280018036084,0.479280018036084,0.946364081323391,"UNG/SUPT6H/MSH6",3
GO:0018208,"GO:0018208","peptidyl-proline modification","3/649","47/11852",0.479280018036084,0.479280018036084,0.946364081323391,"PPIF/PPIE/NTMT1",3
GO:0033013,"GO:0033013","tetrapyrrole metabolic process","3/649","47/11852",0.479280018036084,0.479280018036084,0.946364081323391,"SLC25A38/TSPO/RSAD1",3
GO:0086001,"GO:0086001","cardiac muscle cell action potential","3/649","47/11852",0.479280018036084,0.479280018036084,0.946364081323391,"PKP2/CACNA1D/FLNA",3
GO:0099518,"GO:0099518","vesicle cytoskeletal trafficking","3/649","47/11852",0.479280018036084,0.479280018036084,0.946364081323391,"ACTN4/SYBU/NDEL1",3
GO:0007044,"GO:0007044","cell-substrate junction assembly","5/649","83/11852",0.47963594247452,0.47963594247452,0.946364081323391,"ARHGEF7/CORO1C/AJUBA/THBS1/SDC4",5
GO:1901222,"GO:1901222","regulation of NIK/NF-kappaB signaling","5/649","83/11852",0.47963594247452,0.47963594247452,0.946364081323391,"TNFRSF10B/TRAF2/ACTN4/RPS3/TMSB4X",5
GO:0044728,"GO:0044728","DNA methylation or demethylation","4/649","65/11852",0.479778377539442,0.479778377539442,0.946364081323391,"PRMT5/APEX1/OTUD4/MBD3",4
GO:0046128,"GO:0046128","purine ribonucleoside metabolic process","4/649","65/11852",0.479778377539442,0.479778377539442,0.946364081323391,"IMPDH2/PNP/NME1/GUK1",4
GO:1902036,"GO:1902036","regulation of hematopoietic stem cell differentiation","4/649","65/11852",0.479778377539442,0.479778377539442,0.946364081323391,"PSME4/HSPA9/METTL3/PSMA5",4
GO:2000379,"GO:2000379","positive regulation of reactive oxygen species metabolic process","4/649","65/11852",0.479778377539442,0.479778377539442,0.946364081323391,"RIPK1/THBS1/DDAH1/TSPO",4
GO:2001021,"GO:2001021","negative regulation of response to DNA damage stimulus","4/649","65/11852",0.479778377539442,0.479778377539442,0.946364081323391,"CCAR2/AUNIP/RPS3/PTTG1IP",4
GO:0048732,"GO:0048732","gland development","18/649","319/11852",0.48275242236705,0.48275242236705,0.946364081323391,"BTBD7/TNC/PKM/SEMA3C/CAD/XBP1/PRMT5/DHODH/UMPS/MED1/MSN/HK2/JUN/NME1/TSPO/FBXW7/WDR77/CEBPA",18
GO:0098656,"GO:0098656","anion transmembrane transport","10/649","174/11852",0.484203727513669,0.484203727513669,0.946364081323391,"SLC7A6/SLC7A5/SLC1A5/SLC25A19/RIPK1/THBS1/SLC25A38/SLC3A2/SLC25A17/SLC20A2",10
GO:0032943,"GO:0032943","mononuclear cell proliferation","9/649","156/11852",0.485256232679681,0.485256232679681,0.946364081323391,"ELF4/DNAJA3/MSN/CTPS1/IMPDH2/PNP/SDC4/RPS6/RPS3",9
GO:0030522,"GO:0030522","intracellular receptor signaling pathway","13/649","229/11852",0.487782748965448,0.487782748965448,0.946364081323391,"DNAJA1/C1QBP/DDX5/CNOT1/MED1/SAFB2/ACTN4/SAFB/FABP5/ZBTB7A/RBM14/ESRRA/UBA52",13
GO:0001935,"GO:0001935","endothelial cell proliferation","6/649","102/11852",0.488855887537282,0.488855887537282,0.946364081323391,"SCARB1/XBP1/THBS1/JUN/PRKX/THAP1",6
GO:0055002,"GO:0055002","striated muscle cell development","6/649","102/11852",0.488855887537282,0.488855887537282,0.946364081323391,"WDR1/MYOF/TPM1/ANKRD1/KRT8/ACTG1",6
GO:1905477,"GO:1905477","positive regulation of protein localization to membrane","6/649","102/11852",0.488855887537282,0.488855887537282,0.946364081323391,"PPP1R13B/EZR/MIEF1/E2F1/TFDP1/RACK1",6
GO:0006865,"GO:0006865","amino acid transport","5/649","84/11852",0.490253088195757,0.490253088195757,0.946364081323391,"SLC7A6/SLC7A5/SLC1A5/SLC25A38/SLC3A2",5
GO:0010811,"GO:0010811","positive regulation of cell-substrate adhesion","5/649","84/11852",0.490253088195757,0.490253088195757,0.946364081323391,"ARHGEF7/C1QBP/FLNA/NID1/SDC4",5
GO:0000212,"GO:0000212","meiotic spindle organization","1/649","12/11852",0.491404958437465,0.491404958437465,0.946364081323391,"MYH9",1
GO:0002029,"GO:0002029","desensitization of G protein-coupled receptor signaling pathway","1/649","12/11852",0.491404958437465,0.491404958437465,0.946364081323391,"ADM",1
GO:0002371,"GO:0002371","dendritic cell cytokine production","1/649","12/11852",0.491404958437465,0.491404958437465,0.946364081323391,"DDX21",1
GO:0002407,"GO:0002407","dendritic cell chemotaxis","1/649","12/11852",0.491404958437465,0.491404958437465,0.946364081323391,"C1QBP",1
GO:0002418,"GO:0002418","immune response to tumor cell","1/649","12/11852",0.491404958437465,0.491404958437465,0.946364081323391,"PVR",1
GO:0003414,"GO:0003414","chondrocyte morphogenesis involved in endochondral bone morphogenesis","1/649","12/11852",0.491404958437465,0.491404958437465,0.946364081323391,"COL7A1",1
GO:0003429,"GO:0003429","growth plate cartilage chondrocyte morphogenesis","1/649","12/11852",0.491404958437465,0.491404958437465,0.946364081323391,"COL7A1",1
GO:0006071,"GO:0006071","glycerol metabolic process","1/649","12/11852",0.491404958437465,0.491404958437465,0.946364081323391,"MYOF",1
GO:0006384,"GO:0006384","transcription initiation from RNA polymerase III promoter","1/649","12/11852",0.491404958437465,0.491404958437465,0.946364081323391,"CRCP",1
GO:0006554,"GO:0006554","lysine catabolic process","1/649","12/11852",0.491404958437465,0.491404958437465,0.946364081323391,"OGDH",1
GO:0009162,"GO:0009162","deoxyribonucleoside monophosphate metabolic process","1/649","12/11852",0.491404958437465,0.491404958437465,0.946364081323391,"GUK1",1
GO:0009650,"GO:0009650","UV protection","1/649","12/11852",0.491404958437465,0.491404958437465,0.946364081323391,"FEN1",1
GO:0010452,"GO:0010452","histone H3-K36 methylation","1/649","12/11852",0.491404958437465,0.491404958437465,0.946364081323391,"SETMAR",1
GO:0010826,"GO:0010826","negative regulation of centrosome duplication","1/649","12/11852",0.491404958437465,0.491404958437465,0.946364081323391,"RBM14",1
GO:0010839,"GO:0010839","negative regulation of keratinocyte proliferation","1/649","12/11852",0.491404958437465,0.491404958437465,0.946364081323391,"MED1",1
GO:0015865,"GO:0015865","purine nucleotide transport","1/649","12/11852",0.491404958437465,0.491404958437465,0.946364081323391,"SLC25A17",1
GO:0015868,"GO:0015868","purine ribonucleotide transport","1/649","12/11852",0.491404958437465,0.491404958437465,0.946364081323391,"SLC25A17",1
GO:0016553,"GO:0016553","base conversion or substitution editing","1/649","12/11852",0.491404958437465,0.491404958437465,0.946364081323391,"METTL3",1
GO:0017085,"GO:0017085","response to insecticide","1/649","12/11852",0.491404958437465,0.491404958437465,0.946364081323391,"UBA52",1
GO:0018158,"GO:0018158","protein oxidation","1/649","12/11852",0.491404958437465,0.491404958437465,0.946364081323391,"CHCHD4",1
GO:0022401,"GO:0022401","negative adaptation of signaling pathway","1/649","12/11852",0.491404958437465,0.491404958437465,0.946364081323391,"ADM",1
GO:0023058,"GO:0023058","adaptation of signaling pathway","1/649","12/11852",0.491404958437465,0.491404958437465,0.946364081323391,"ADM",1
GO:0030214,"GO:0030214","hyaluronan catabolic process","1/649","12/11852",0.491404958437465,0.491404958437465,0.946364081323391,"HYAL2",1
GO:0031281,"GO:0031281","positive regulation of cyclase activity","1/649","12/11852",0.491404958437465,0.491404958437465,0.946364081323391,"CACNA1D",1
GO:0031645,"GO:0031645","negative regulation of neurological system process","1/649","12/11852",0.491404958437465,0.491404958437465,0.946364081323391,"EIF4A3",1
GO:0032891,"GO:0032891","negative regulation of organic acid transport","1/649","12/11852",0.491404958437465,0.491404958437465,0.946364081323391,"THBS1",1
GO:0034367,"GO:0034367","protein-containing complex remodeling","1/649","12/11852",0.491404958437465,0.491404958437465,0.946364081323391,"SCARB1",1
GO:0034393,"GO:0034393","positive regulation of smooth muscle cell apoptotic process","1/649","12/11852",0.491404958437465,0.491404958437465,0.946364081323391,"ATF4",1
GO:0035458,"GO:0035458","cellular response to interferon-beta","1/649","12/11852",0.491404958437465,0.491404958437465,0.946364081323391,"UBE2G2",1
GO:0035640,"GO:0035640","exploration behavior","1/649","12/11852",0.491404958437465,0.491404958437465,0.946364081323391,"EIF4A3",1
GO:0035729,"GO:0035729","cellular response to hepatocyte growth factor stimulus","1/649","12/11852",0.491404958437465,0.491404958437465,0.946364081323391,"MED1",1
GO:0035855,"GO:0035855","megakaryocyte development","1/649","12/11852",0.491404958437465,0.491404958437465,0.946364081323391,"MED1",1
GO:0036035,"GO:0036035","osteoclast development","1/649","12/11852",0.491404958437465,0.491404958437465,0.946364081323391,"FBXW7",1
GO:0042574,"GO:0042574","retinal metabolic process","1/649","12/11852",0.491404958437465,0.491404958437465,0.946364081323391,"RDH13",1
GO:0043476,"GO:0043476","pigment accumulation","1/649","12/11852",0.491404958437465,0.491404958437465,0.946364081323391,"ANKRD27",1
GO:0043482,"GO:0043482","cellular pigment accumulation","1/649","12/11852",0.491404958437465,0.491404958437465,0.946364081323391,"ANKRD27",1
GO:0044849,"GO:0044849","estrous cycle","1/649","12/11852",0.491404958437465,0.491404958437465,0.946364081323391,"MMP7",1
GO:0045672,"GO:0045672","positive regulation of osteoclast differentiation","1/649","12/11852",0.491404958437465,0.491404958437465,0.946364081323391,"CA2",1
GO:0045725,"GO:0045725","positive regulation of glycogen biosynthetic process","1/649","12/11852",0.491404958437465,0.491404958437465,0.946364081323391,"IRS1",1
GO:0045940,"GO:0045940","positive regulation of steroid metabolic process","1/649","12/11852",0.491404958437465,0.491404958437465,0.946364081323391,"ADM",1
GO:0050996,"GO:0050996","positive regulation of lipid catabolic process","1/649","12/11852",0.491404958437465,0.491404958437465,0.946364081323391,"IRS1",1
GO:0051004,"GO:0051004","regulation of lipoprotein lipase activity","1/649","12/11852",0.491404958437465,0.491404958437465,0.946364081323391,"PCSK6",1
GO:0051127,"GO:0051127","positive regulation of actin nucleation","1/649","12/11852",0.491404958437465,0.491404958437465,0.946364081323391,"TRIM27",1
GO:0051349,"GO:0051349","positive regulation of lyase activity","1/649","12/11852",0.491404958437465,0.491404958437465,0.946364081323391,"CACNA1D",1
GO:0051503,"GO:0051503","adenine nucleotide transport","1/649","12/11852",0.491404958437465,0.491404958437465,0.946364081323391,"SLC25A17",1
GO:0055089,"GO:0055089","fatty acid homeostasis","1/649","12/11852",0.491404958437465,0.491404958437465,0.946364081323391,"XBP1",1
GO:0060009,"GO:0060009","Sertoli cell development","1/649","12/11852",0.491404958437465,0.491404958437465,0.946364081323391,"FLNA",1
GO:0060712,"GO:0060712","spongiotrophoblast layer development","1/649","12/11852",0.491404958437465,0.491404958437465,0.946364081323391,"ADM",1
GO:0061000,"GO:0061000","negative regulation of dendritic spine development","1/649","12/11852",0.491404958437465,0.491404958437465,0.946364081323391,"PLK2",1
GO:0070863,"GO:0070863","positive regulation of protein exit from endoplasmic reticulum","1/649","12/11852",0.491404958437465,0.491404958437465,0.946364081323391,"SEC16A",1
GO:0071474,"GO:0071474","cellular hyperosmotic response","1/649","12/11852",0.491404958437465,0.491404958437465,0.946364081323391,"LETM1",1
GO:0071712,"GO:0071712","ER-associated misfolded protein catabolic process","1/649","12/11852",0.491404958437465,0.491404958437465,0.946364081323391,"SDF2L1",1
GO:0071731,"GO:0071731","response to nitric oxide","1/649","12/11852",0.491404958437465,0.491404958437465,0.946364081323391,"TRAF2",1
GO:0086012,"GO:0086012","membrane depolarization during cardiac muscle cell action potential","1/649","12/11852",0.491404958437465,0.491404958437465,0.946364081323391,"CACNA1D",1
GO:0090161,"GO:0090161","Golgi ribbon formation","1/649","12/11852",0.491404958437465,0.491404958437465,0.946364081323391,"PRMT5",1
GO:0090171,"GO:0090171","chondrocyte morphogenesis","1/649","12/11852",0.491404958437465,0.491404958437465,0.946364081323391,"COL7A1",1
GO:0090177,"GO:0090177","establishment of planar polarity involved in neural tube closure","1/649","12/11852",0.491404958437465,0.491404958437465,0.946364081323391,"DVL3",1
GO:0097201,"GO:0097201","negative regulation of transcription from RNA polymerase II promoter in response to stress","1/649","12/11852",0.491404958437465,0.491404958437465,0.946364081323391,"JUN",1
GO:1902074,"GO:1902074","response to salt","1/649","12/11852",0.491404958437465,0.491404958437465,0.946364081323391,"HSPA5",1
GO:1902902,"GO:1902902","negative regulation of autophagosome assembly","1/649","12/11852",0.491404958437465,0.491404958437465,0.946364081323391,"CHMP4B",1
GO:1903350,"GO:1903350","response to dopamine","1/649","12/11852",0.491404958437465,0.491404958437465,0.946364081323391,"ATF4",1
GO:1903351,"GO:1903351","cellular response to dopamine","1/649","12/11852",0.491404958437465,0.491404958437465,0.946364081323391,"ATF4",1
GO:1903587,"GO:1903587","regulation of blood vessel endothelial cell proliferation involved in sprouting angiogenesis","1/649","12/11852",0.491404958437465,0.491404958437465,0.946364081323391,"THBS1",1
GO:1903894,"GO:1903894","regulation of IRE1-mediated unfolded protein response","1/649","12/11852",0.491404958437465,0.491404958437465,0.946364081323391,"HSPA5",1
GO:1903960,"GO:1903960","negative regulation of anion transmembrane transport","1/649","12/11852",0.491404958437465,0.491404958437465,0.946364081323391,"THBS1",1
GO:1904152,"GO:1904152","regulation of retrograde protein transport, ER to cytosol","1/649","12/11852",0.491404958437465,0.491404958437465,0.946364081323391,"UBE2G2",1
GO:1904263,"GO:1904263","positive regulation of TORC1 signaling","1/649","12/11852",0.491404958437465,0.491404958437465,0.946364081323391,"TELO2",1
GO:1904293,"GO:1904293","negative regulation of ERAD pathway","1/649","12/11852",0.491404958437465,0.491404958437465,0.946364081323391,"UBE2G2",1
GO:1904923,"GO:1904923","regulation of autophagy of mitochondrion in response to mitochondrial depolarization","1/649","12/11852",0.491404958437465,0.491404958437465,0.946364081323391,"HK2",1
GO:1905523,"GO:1905523","positive regulation of macrophage migration","1/649","12/11852",0.491404958437465,0.491404958437465,0.946364081323391,"THBS1",1
GO:2001025,"GO:2001025","positive regulation of response to drug","1/649","12/11852",0.491404958437465,0.491404958437465,0.946364081323391,"RIPK1",1
GO:2001028,"GO:2001028","positive regulation of endothelial cell chemotaxis","1/649","12/11852",0.491404958437465,0.491404958437465,0.946364081323391,"TMSB4X",1
GO:2001044,"GO:2001044","regulation of integrin-mediated signaling pathway","1/649","12/11852",0.491404958437465,0.491404958437465,0.946364081323391,"FLNA",1
GO:0071496,"GO:0071496","cellular response to external stimulus","15/649","266/11852",0.491601167051812,0.491601167051812,0.946364081323391,"TNC/HSPA5/CNN2/XBP1/TNFRSF10B/MED1/ATF4/MYBBP1A/EIF2S1/MMP7/ANKRD1/FOSL1/JUN/WDR45B/DCTPP1",15
GO:0006342,"GO:0006342","chromatin silencing","4/649","66/11852",0.491774017404403,0.491774017404403,0.946364081323391,"ZNFX1/HMGA1/MBD3/POLE3",4
GO:0033273,"GO:0033273","response to vitamin","4/649","66/11852",0.491774017404403,0.491774017404403,0.946364081323391,"TNC/MED1/TSPO/SRSF2",4
GO:0046785,"GO:0046785","microtubule polymerization","4/649","66/11852",0.491774017404403,0.491774017404403,0.946364081323391,"ZNF207/NDEL1/RPS3/DRG1",4
GO:1901987,"GO:1901987","regulation of cell cycle phase transition","23/649","412/11852",0.493111584071626,0.493111584071626,0.946364081323391,"ZNF207/CUL1/PSME4/ORC1/CLSPN/APEX1/E2F1/CNOT1/RIPK1/PLK2/CDCA5/CDC25A/BRD7/TFDP1/E2F4/PINX1/FBXW7/RPA2/PRMT1/HAUS2/PSMA5/PLRG1/HAUS7",23
GO:0010803,"GO:0010803","regulation of tumor necrosis factor-mediated signaling pathway","3/649","48/11852",0.49339094568022,0.49339094568022,0.946364081323391,"TRAF2/RIPK1/RACK1",3
GO:0016445,"GO:0016445","somatic diversification of immunoglobulins","3/649","48/11852",0.49339094568022,0.49339094568022,0.946364081323391,"UNG/SUPT6H/MSH6",3
GO:0034394,"GO:0034394","protein localization to cell surface","3/649","48/11852",0.49339094568022,0.49339094568022,0.946364081323391,"GGA2/BDNF/FLNA",3
GO:0046323,"GO:0046323","glucose import","3/649","48/11852",0.49339094568022,0.49339094568022,0.946364081323391,"HK2/PEA15/IRS1",3
GO:0046686,"GO:0046686","response to cadmium ion","3/649","48/11852",0.49339094568022,0.49339094568022,0.946364081323391,"SORD/JUN/MT1E",3
GO:0051438,"GO:0051438","regulation of ubiquitin-protein transferase activity","3/649","48/11852",0.49339094568022,0.49339094568022,0.946364081323391,"FBXW7/RPL23/RPS7",3
GO:1901379,"GO:1901379","regulation of potassium ion transmembrane transport","3/649","48/11852",0.49339094568022,0.49339094568022,0.946364081323391,"WNK1/CACNA1D/FLNA",3
GO:0051259,"GO:0051259","protein complex oligomerization","22/649","394/11852",0.494205595509061,0.494205595509061,0.946364081323391,"PKM/HM13/CHMP4B/EHD4/SLC1A5/TWNK/ZNHIT6/AHNAK/TRAF2/RIPK1/ALDOA/LETM1/DDIT3/IMPDH2/RCC1/TRIM27/RPS19/PRMT1/KCTD5/DCTPP1/LONP1/RACK1",22
GO:0001894,"GO:0001894","tissue homeostasis","8/649","139/11852",0.494613693758301,0.494613693758301,0.946364081323391,"CHMP4B/WDR36/IQCB1/ACTG1/NANOS1/ERCC6/DRAM2/CA2",8
GO:0006656,"GO:0006656","phosphatidylcholine biosynthetic process","2/649","30/11852",0.494765967649328,0.494765967649328,0.946364081323391,"FABP5/MFSD2A",2
GO:0006921,"GO:0006921","cellular component disassembly involved in execution phase of apoptosis","2/649","30/11852",0.494765967649328,0.494765967649328,0.946364081323391,"ACIN1/KPNB1",2
GO:0007435,"GO:0007435","salivary gland morphogenesis","2/649","30/11852",0.494765967649328,0.494765967649328,0.946364081323391,"BTBD7/SEMA3C",2
GO:0021545,"GO:0021545","cranial nerve development","2/649","30/11852",0.494765967649328,0.494765967649328,0.946364081323391,"RPL24/CHD7",2
GO:0043038,"GO:0043038","amino acid activation","2/649","30/11852",0.494765967649328,0.494765967649328,0.946364081323391,"GATC/YARS2",2
GO:0046685,"GO:0046685","response to arsenic-containing substance","2/649","30/11852",0.494765967649328,0.494765967649328,0.946364081323391,"PPIF/ATF4",2
GO:0050873,"GO:0050873","brown fat cell differentiation","2/649","30/11852",0.494765967649328,0.494765967649328,0.946364081323391,"PLAC8/CEBPA",2
GO:1901976,"GO:1901976","regulation of cell cycle checkpoint","2/649","30/11852",0.494765967649328,0.494765967649328,0.946364081323391,"CCAR2/RPA2",2
GO:0010506,"GO:0010506","regulation of autophagy","16/649","285/11852",0.496186645413808,0.496186645413808,0.946364081323391,"USP36/TIGAR/XBP1/CHMP4B/USP10/TBC1D14/ULK3/ATP6V1C2/PLK2/HK2/DDIT3/DRAM2/TSPO/FBXW7/ATG101/ATP6V1B2",16
GO:0035148,"GO:0035148","tube formation","7/649","121/11852",0.496398534716278,0.496398534716278,0.946364081323391,"MTHFD1/MTHFD1L/ADM/DVL3/IRX3/SDC4/RPS7",7
GO:1903364,"GO:1903364","positive regulation of cellular protein catabolic process","7/649","121/11852",0.496398534716278,0.496398534716278,0.946364081323391,"EZR/PLK2/MSN/FBXW7/PTTG1IP/RACK1/CEBPA",7
GO:0071383,"GO:0071383","cellular response to steroid hormone stimulus","11/649","194/11852",0.497186210615961,0.497186210615961,0.946364081323391,"DNAJA1/DDX5/CNOT1/MED1/ZFP36/SAFB2/SAFB/ZBTB7A/EIF4EBP1/RBM14/ESRRA",11
GO:0018205,"GO:0018205","peptidyl-lysine modification","19/649","340/11852",0.497784740588655,0.497784740588655,0.946364081323391,"NUP160/NUP50/UBE2I/SUPT6H/NUP98/NUP153/SETD7/YEATS2/GNL3/BRD7/RUVBL1/MBD3/EEF2KMT/UBA2/DOHH/P3H4/POLE3/SETMAR/WDR5",19
GO:0050954,"GO:0050954","sensory perception of mechanical stimulus","6/649","103/11852",0.4984261574657,0.4984261574657,0.946364081323391,"WDR1/CACNA1D/CHD7/RPL38/TIMM13/NDUFB9",6
GO:0000819,"GO:0000819","sister chromatid segregation","10/649","176/11852",0.498875302005453,0.498875302005453,0.946364081323391,"ZNF207/CHMP4B/AKAP8/KPNB1/CDCA5/RRS1/PINX1/FBXW7/FEN1/MCMBP",10
GO:0097191,"GO:0097191","extrinsic apoptotic signaling pathway","10/649","176/11852",0.498875302005453,0.498875302005453,0.946364081323391,"TNFRSF10B/TRAF2/BCL2L2/RIPK1/THBS1/PEA15/KRT8/TNFRSF12A/HYAL2/KRT18",10
GO:0003206,"GO:0003206","cardiac chamber morphogenesis","5/649","85/11852",0.500791020338277,0.500791020338277,0.946364081323391,"PKP2/SEMA3C/MED1/TPM1/CHD7",5
GO:0032355,"GO:0032355","response to estradiol","5/649","85/11852",0.500791020338277,0.500791020338277,0.946364081323391,"DDX18/BCL2L2/ARPC1B/MBD3/ESRRA",5
GO:0043271,"GO:0043271","negative regulation of ion transport","5/649","85/11852",0.500791020338277,0.500791020338277,0.946364081323391,"WNK1/PPIF/ATF4/THBS1/TRIM27",5
GO:1904064,"GO:1904064","positive regulation of cation transmembrane transport","5/649","85/11852",0.500791020338277,0.500791020338277,0.946364081323391,"WNK1/ACTN4/CNKSR3/FLNA/TMSB4X",5
GO:0000245,"GO:0000245","spliceosomal complex assembly","4/649","67/11852",0.503653144868714,0.503653144868714,0.946364081323391,"SF1/SF3A3/LUC7L/SNRPD1",4
GO:0008652,"GO:0008652","cellular amino acid biosynthetic process","4/649","67/11852",0.503653144868714,0.503653144868714,0.946364081323391,"CAD/MTHFD1/PHGDH/PYCR1",4
GO:0032414,"GO:0032414","positive regulation of ion transmembrane transporter activity","4/649","67/11852",0.503653144868714,0.503653144868714,0.946364081323391,"WNK1/ACTN4/CNKSR3/TMSB4X",4
GO:0043406,"GO:0043406","positive regulation of MAP kinase activity","11/649","195/11852",0.504141843242701,0.504141843242701,0.946364081323391,"MAP3K4/TRAF2/AJUBA/RIPK1/THBS1/DUSP5/DVL3/PEA15/ERCC6/RPS3/UBA52",11
GO:0001890,"GO:0001890","placenta development","7/649","122/11852",0.505180657382458,0.505180657382458,0.946364081323391,"MAP3K4/MED1/ADM/KRT8/FOSL1/RPS6/CEBPA",7
GO:0010770,"GO:0010770","positive regulation of cell morphogenesis involved in differentiation","7/649","122/11852",0.505180657382458,0.505180657382458,0.946364081323391,"ARHGEF7/ANKRD27/C1QBP/NDEL1/BDNF/FLNA/TNFRSF12A",7
GO:1901214,"GO:1901214","regulation of neuron death","13/649","232/11852",0.506981290469052,0.506981290469052,0.946364081323391,"TIGAR/PPP1R13B/CHMP4B/ZPR1/TRAF2/ATF4/EIF2S1/DDIT3/BDNF/JUN/XRCC2/FBXW7/RACK1",13
GO:0006826,"GO:0006826","iron ion transport","3/649","49/11852",0.507309564039798,0.507309564039798,0.946364081323391,"SLC39A14/ATP6V1C2/ATP6V1B2",3
GO:0014015,"GO:0014015","positive regulation of gliogenesis","3/649","49/11852",0.507309564039798,0.507309564039798,0.946364081323391,"PRMT5/E2F1/TSPO",3
GO:0040014,"GO:0040014","regulation of multicellular organism growth","3/649","49/11852",0.507309564039798,0.507309564039798,0.946364081323391,"EZR/PLAC8/CHD7",3
GO:0051893,"GO:0051893","regulation of focal adhesion assembly","3/649","49/11852",0.507309564039798,0.507309564039798,0.946364081323391,"CORO1C/THBS1/SDC4",3
GO:0090109,"GO:0090109","regulation of cell-substrate junction assembly","3/649","49/11852",0.507309564039798,0.507309564039798,0.946364081323391,"CORO1C/THBS1/SDC4",3
GO:0006119,"GO:0006119","oxidative phosphorylation","6/649","104/11852",0.50793422157882,0.50793422157882,0.946364081323391,"PPIF/AFG1L/UQCRB/NDUFB11/NDUFB9/UQCC3",6
GO:0045089,"GO:0045089","positive regulation of innate immune response","15/649","269/11852",0.509441059108012,0.509441059108012,0.946364081323391,"POLR3B/CUL1/PSME4/PVR/C1QBP/MED1/RIPK1/EPG5/OTUD4/RBM14/RPS19/PSMA5/POLR3D/TNIP2/UBA52",15
GO:0038061,"GO:0038061","NIK/NF-kappaB signaling","8/649","141/11852",0.510976831146115,0.510976831146115,0.946364081323391,"CUL1/PSME4/TNFRSF10B/TRAF2/ACTN4/PSMA5/RPS3/TMSB4X",8
GO:0050878,"GO:0050878","regulation of body fluid levels","17/649","306/11852",0.511628436930913,0.511628436930913,0.946364081323391,"PLAUR/WNK1/CAD/XBP1/MYH9/DHODH/C1QBP/UMPS/PLAU/MED1/THBS1/ADM/HK2/ACTG1/FLNA/NME1/HYAL2",17
GO:0006911,"GO:0006911","phagocytosis, engulfment","2/649","31/11852",0.512361286671493,0.512361286671493,0.946364081323391,"MYH9/THBS1",2
GO:0006949,"GO:0006949","syncytium formation","2/649","31/11852",0.512361286671493,0.512361286671493,0.946364081323391,"MYH9/MYOF",2
GO:0010883,"GO:0010883","regulation of lipid storage","2/649","31/11852",0.512361286671493,0.512361286671493,0.946364081323391,"SCARB1/FBXW7",2
GO:0014075,"GO:0014075","response to amine","2/649","31/11852",0.512361286671493,0.512361286671493,0.946364081323391,"CAD/NME1",2
GO:0033572,"GO:0033572","transferrin transport","2/649","31/11852",0.512361286671493,0.512361286671493,0.946364081323391,"ATP6V1C2/ATP6V1B2",2
GO:0042551,"GO:0042551","neuron maturation","2/649","31/11852",0.512361286671493,0.512361286671493,0.946364081323391,"IRX5/FARP2",2
GO:0043331,"GO:0043331","response to dsRNA","2/649","31/11852",0.512361286671493,0.512361286671493,0.946364081323391,"DDX21/SLC3A2",2
GO:0060042,"GO:0060042","retina morphogenesis in camera-type eye","2/649","31/11852",0.512361286671493,0.512361286671493,0.946364081323391,"IRX5/RDH13",2
GO:0072376,"GO:0072376","protein activation cascade","2/649","31/11852",0.512361286671493,0.512361286671493,0.946364081323391,"C1QBP/SUSD4",2
GO:0086004,"GO:0086004","regulation of cardiac muscle cell contraction","2/649","31/11852",0.512361286671493,0.512361286671493,0.946364081323391,"PKP2/FLNA",2
GO:1902229,"GO:1902229","regulation of intrinsic apoptotic signaling pathway in response to DNA damage","2/649","31/11852",0.512361286671493,0.512361286671493,0.946364081323391,"CCAR2/RPS3",2
GO:1903672,"GO:1903672","positive regulation of sprouting angiogenesis","2/649","31/11852",0.512361286671493,0.512361286671493,0.946364081323391,"PKM/PLK2",2
GO:0051146,"GO:0051146","striated muscle cell differentiation","10/649","178/11852",0.513436062578676,0.513436062578676,0.946364081323391,"WDR1/XBP1/MYH9/RBM38/MYOF/TPM1/ANKRD1/KRT8/BDNF/ACTG1",10
GO:0009636,"GO:0009636","response to toxic substance","19/649","343/11852",0.51361070684931,0.51361070684931,0.946364081323391,"TNC/APEX1/PPIF/DHX15/UBIAD1/ATF4/RIPK1/SETD7/FOSL1/JUN/EIF4EBP1/ERCC6/MT1E/TRAP1/RPS3/PYCR1/RPL10A/RACK1/UBA52",19
GO:0042278,"GO:0042278","purine nucleoside metabolic process","4/649","68/11852",0.515408478922613,0.515408478922613,0.946364081323391,"IMPDH2/PNP/NME1/GUK1",4
GO:1904659,"GO:1904659","glucose transmembrane transport","4/649","68/11852",0.515408478922613,0.515408478922613,0.946364081323391,"HK2/PEA15/FABP5/IRS1",4
GO:0006282,"GO:0006282","regulation of DNA repair","6/649","105/11852",0.517375805794767,0.517375805794767,0.946364081323391,"TIGAR/ERCC6/RPA2/AUNIP/RPS3/SETMAR",6
GO:0006289,"GO:0006289","nucleotide-excision repair","6/649","105/11852",0.517375805794767,0.517375805794767,0.946364081323391,"LIG3/POLD3/ERCC6/PPIE/RPA2/UBA52",6
GO:0000097,"GO:0000097","sulfur amino acid biosynthetic process","1/649","13/11852",0.519283183266357,0.519283183266357,0.946364081323391,"MTHFD1",1
GO:0002026,"GO:0002026","regulation of the force of heart contraction","1/649","13/11852",0.519283183266357,0.519283183266357,0.946364081323391,"ADM",1
GO:0002070,"GO:0002070","epithelial cell maturation","1/649","13/11852",0.519283183266357,0.519283183266357,0.946364081323391,"XBP1",1
GO:0003422,"GO:0003422","growth plate cartilage morphogenesis","1/649","13/11852",0.519283183266357,0.519283183266357,0.946364081323391,"COL7A1",1
GO:0006089,"GO:0006089","lactate metabolic process","1/649","13/11852",0.519283183266357,0.519283183266357,0.946364081323391,"TIGAR",1
GO:0006525,"GO:0006525","arginine metabolic process","1/649","13/11852",0.519283183266357,0.519283183266357,0.946364081323391,"DDAH1",1
GO:0006553,"GO:0006553","lysine metabolic process","1/649","13/11852",0.519283183266357,0.519283183266357,0.946364081323391,"OGDH",1
GO:0006896,"GO:0006896","Golgi to vacuole transport","1/649","13/11852",0.519283183266357,0.519283183266357,0.946364081323391,"ANKFY1",1
GO:0007100,"GO:0007100","mitotic centrosome separation","1/649","13/11852",0.519283183266357,0.519283183266357,0.946364081323391,"NDEL1",1
GO:0010878,"GO:0010878","cholesterol storage","1/649","13/11852",0.519283183266357,0.519283183266357,0.946364081323391,"SCARB1",1
GO:0030325,"GO:0030325","adrenal gland development","1/649","13/11852",0.519283183266357,0.519283183266357,0.946364081323391,"TSPO",1
GO:0031269,"GO:0031269","pseudopodium assembly","1/649","13/11852",0.519283183266357,0.519283183266357,0.946364081323391,"CDC42EP2",1
GO:0032689,"GO:0032689","negative regulation of interferon-gamma production","1/649","13/11852",0.519283183266357,0.519283183266357,0.946364081323391,"C1QBP",1
GO:0032717,"GO:0032717","negative regulation of interleukin-8 production","1/649","13/11852",0.519283183266357,0.519283183266357,0.946364081323391,"TMSB4X",1
GO:0032928,"GO:0032928","regulation of superoxide anion generation","1/649","13/11852",0.519283183266357,0.519283183266357,0.946364081323391,"AATF",1
GO:0033631,"GO:0033631","cell-cell adhesion mediated by integrin","1/649","13/11852",0.519283183266357,0.519283183266357,0.946364081323391,"WNK1",1
GO:0034982,"GO:0034982","mitochondrial protein processing","1/649","13/11852",0.519283183266357,0.519283183266357,0.946364081323391,"PMPCA",1
GO:0042104,"GO:0042104","positive regulation of activated T cell proliferation","1/649","13/11852",0.519283183266357,0.519283183266357,0.946364081323391,"RPS3",1
GO:0042249,"GO:0042249","establishment of planar polarity of embryonic epithelium","1/649","13/11852",0.519283183266357,0.519283183266357,0.946364081323391,"DVL3",1
GO:0042535,"GO:0042535","positive regulation of tumor necrosis factor biosynthetic process","1/649","13/11852",0.519283183266357,0.519283183266357,0.946364081323391,"THBS1",1
GO:0043247,"GO:0043247","telomere maintenance in response to DNA damage","1/649","13/11852",0.519283183266357,0.519283183266357,0.946364081323391,"APEX1",1
GO:0044827,"GO:0044827","modulation by host of viral genome replication","1/649","13/11852",0.519283183266357,0.519283183266357,0.946364081323391,"CCNK",1
GO:0045109,"GO:0045109","intermediate filament organization","1/649","13/11852",0.519283183266357,0.519283183266357,0.946364081323391,"PKP2",1
GO:0045198,"GO:0045198","establishment of epithelial cell apical/basal polarity","1/649","13/11852",0.519283183266357,0.519283183266357,0.946364081323391,"MSN",1
GO:0045671,"GO:0045671","negative regulation of osteoclast differentiation","1/649","13/11852",0.519283183266357,0.519283183266357,0.946364081323391,"FBXW7",1
GO:0046606,"GO:0046606","negative regulation of centrosome cycle","1/649","13/11852",0.519283183266357,0.519283183266357,0.946364081323391,"RBM14",1
GO:0050765,"GO:0050765","negative regulation of phagocytosis","1/649","13/11852",0.519283183266357,0.519283183266357,0.946364081323391,"RACK1",1
GO:0051195,"GO:0051195","negative regulation of cofactor metabolic process","1/649","13/11852",0.519283183266357,0.519283183266357,0.946364081323391,"TIGAR",1
GO:0070193,"GO:0070193","synaptonemal complex organization","1/649","13/11852",0.519283183266357,0.519283183266357,0.946364081323391,"P3H4",1
GO:0070525,"GO:0070525","tRNA threonylcarbamoyladenosine metabolic process","1/649","13/11852",0.519283183266357,0.519283183266357,0.946364081323391,"PUS1",1
GO:0070734,"GO:0070734","histone H3-K27 methylation","1/649","13/11852",0.519283183266357,0.519283183266357,0.946364081323391,"SUPT6H",1
GO:0070875,"GO:0070875","positive regulation of glycogen metabolic process","1/649","13/11852",0.519283183266357,0.519283183266357,0.946364081323391,"IRS1",1
GO:0071380,"GO:0071380","cellular response to prostaglandin E stimulus","1/649","13/11852",0.519283183266357,0.519283183266357,0.946364081323391,"AKAP8",1
GO:0090153,"GO:0090153","regulation of sphingolipid biosynthetic process","1/649","13/11852",0.519283183266357,0.519283183266357,0.946364081323391,"RACK1",1
GO:0090208,"GO:0090208","positive regulation of triglyceride metabolic process","1/649","13/11852",0.519283183266357,0.519283183266357,0.946364081323391,"SCARB1",1
GO:0090343,"GO:0090343","positive regulation of cell aging","1/649","13/11852",0.519283183266357,0.519283183266357,0.946364081323391,"HMGA1",1
GO:0097067,"GO:0097067","cellular response to thyroid hormone stimulus","1/649","13/11852",0.519283183266357,0.519283183266357,0.946364081323391,"MED1",1
GO:0098911,"GO:0098911","regulation of ventricular cardiac muscle cell action potential","1/649","13/11852",0.519283183266357,0.519283183266357,0.946364081323391,"PKP2",1
GO:1900103,"GO:1900103","positive regulation of endoplasmic reticulum unfolded protein response","1/649","13/11852",0.519283183266357,0.519283183266357,0.946364081323391,"XBP1",1
GO:1901623,"GO:1901623","regulation of lymphocyte chemotaxis","1/649","13/11852",0.519283183266357,0.519283183266357,0.946364081323391,"WNK1",1
GO:1902170,"GO:1902170","cellular response to reactive nitrogen species","1/649","13/11852",0.519283183266357,0.519283183266357,0.946364081323391,"TRAF2",1
GO:1903019,"GO:1903019","negative regulation of glycoprotein metabolic process","1/649","13/11852",0.519283183266357,0.519283183266357,0.946364081323391,"AATF",1
GO:1903541,"GO:1903541","regulation of exosomal secretion","1/649","13/11852",0.519283183266357,0.519283183266357,0.946364081323391,"SDC4",1
GO:1903543,"GO:1903543","positive regulation of exosomal secretion","1/649","13/11852",0.519283183266357,0.519283183266357,0.946364081323391,"SDC4",1
GO:1903729,"GO:1903729","regulation of plasma membrane organization","1/649","13/11852",0.519283183266357,0.519283183266357,0.946364081323391,"MYH9",1
GO:1904706,"GO:1904706","negative regulation of vascular smooth muscle cell proliferation","1/649","13/11852",0.519283183266357,0.519283183266357,0.946364081323391,"TPM1",1
GO:1905038,"GO:1905038","regulation of membrane lipid metabolic process","1/649","13/11852",0.519283183266357,0.519283183266357,0.946364081323391,"RACK1",1
GO:1905276,"GO:1905276","regulation of epithelial tube formation","1/649","13/11852",0.519283183266357,0.519283183266357,0.946364081323391,"DVL3",1
GO:1990000,"GO:1990000","amyloid fibril formation","1/649","13/11852",0.519283183266357,0.519283183266357,0.946364081323391,"RIPK1",1
GO:2000303,"GO:2000303","regulation of ceramide biosynthetic process","1/649","13/11852",0.519283183266357,0.519283183266357,0.946364081323391,"RACK1",1
GO:2000353,"GO:2000353","positive regulation of endothelial cell apoptotic process","1/649","13/11852",0.519283183266357,0.519283183266357,0.946364081323391,"THBS1",1
GO:2000696,"GO:2000696","regulation of epithelial cell differentiation involved in kidney development","1/649","13/11852",0.519283183266357,0.519283183266357,0.946364081323391,"PRKX",1
GO:2001014,"GO:2001014","regulation of skeletal muscle cell differentiation","1/649","13/11852",0.519283183266357,0.519283183266357,0.946364081323391,"DDX5",1
GO:0043254,"GO:0043254","regulation of protein complex assembly","21/649","381/11852",0.520428572452111,0.520428572452111,0.946364081323391,"DHX33/CDH17/ANKRD27/CNOT1/AJUBA/ARPC5L/MSN/CDC42EP2/FOSL1/JUN/EIF4EBP1/TRIM27/ARPC1B/FARP2/RRN3/RPA2/RPL13A/RPS3/DRG1/RACK1/TMSB4X",21
GO:0032872,"GO:0032872","regulation of stress-activated MAPK cascade","10/649","179/11852",0.520669562676564,0.520669562676564,0.946364081323391,"MAP3K4/DNAJA1/EZR/TRAF2/RIPK1/DVL3/ERCC6/PRMT1/RPS3/ZNF622",10
GO:0030193,"GO:0030193","regulation of blood coagulation","3/649","50/11852",0.521026255661389,0.521026255661389,0.946364081323391,"PLAUR/PLAU/THBS1",3
GO:0043536,"GO:0043536","positive regulation of blood vessel endothelial cell migration","3/649","50/11852",0.521026255661389,0.521026255661389,0.946364081323391,"THBS1/PLK2/TMSB4X",3
GO:0046889,"GO:0046889","positive regulation of lipid biosynthetic process","3/649","50/11852",0.521026255661389,0.521026255661389,0.946364081323391,"SCARB1/ADM/RACK1",3
GO:0070227,"GO:0070227","lymphocyte apoptotic process","3/649","50/11852",0.521026255661389,0.521026255661389,0.946364081323391,"DNAJA3/RIPK1/RPS6",3
GO:0090329,"GO:0090329","regulation of DNA-dependent DNA replication","3/649","50/11852",0.521026255661389,0.521026255661389,0.946364081323391,"LIG3/MSH6/FBXW7",3
GO:0097345,"GO:0097345","mitochondrial outer membrane permeabilization","3/649","50/11852",0.521026255661389,0.521026255661389,0.946364081323391,"PPP1R13B/E2F1/TFDP1",3
GO:1900046,"GO:1900046","regulation of hemostasis","3/649","50/11852",0.521026255661389,0.521026255661389,0.946364081323391,"PLAUR/PLAU/THBS1",3
GO:0061387,"GO:0061387","regulation of extent of cell growth","5/649","87/11852",0.521607097005453,0.521607097005453,0.946364081323391,"SEMA3C/WDR36/NDEL1/BDNF/TNFRSF12A",5
GO:0071222,"GO:0071222","cellular response to lipopolysaccharide","7/649","124/11852",0.522587693808563,0.522587693808563,0.946364081323391,"SCARB1/XBP1/AKAP8/ZFP36/ANKRD1/TSPO/TNIP2",7
GO:0043280,"GO:0043280","positive regulation of cysteine-type endopeptidase activity involved in apoptotic process","6/649","106/11852",0.526746821261742,0.526746821261742,0.946364081323391,"TNFRSF10B/TRAF2/RIPK1/PDCD2/RPS3/RACK1",6
GO:0007127,"GO:0007127","meiosis I","4/649","69/11852",0.527033239079532,0.527033239079532,0.946364081323391,"RAD54L/PSMC3IP/CCNB1IP1/P3H4",4
GO:1903533,"GO:1903533","regulation of protein targeting","4/649","69/11852",0.527033239079532,0.527033239079532,0.946364081323391,"USP36/HUWE1/MIEF1/FBXW7",4
GO:0002711,"GO:0002711","positive regulation of T cell mediated immunity","2/649","32/11852",0.529547968388674,0.529547968388674,0.946364081323391,"PVR/TRAF2",2
GO:0014009,"GO:0014009","glial cell proliferation","2/649","32/11852",0.529547968388674,0.529547968388674,0.946364081323391,"E2F1/TSPO",2
GO:0032205,"GO:0032205","negative regulation of telomere maintenance","2/649","32/11852",0.529547968388674,0.529547968388674,0.946364081323391,"NAT10/PINX1",2
GO:0050999,"GO:0050999","regulation of nitric-oxide synthase activity","2/649","32/11852",0.529547968388674,0.529547968388674,0.946364081323391,"SCARB1/DDAH1",2
GO:0051294,"GO:0051294","establishment of spindle orientation","2/649","32/11852",0.529547968388674,0.529547968388674,0.946364081323391,"BCCIP/NDEL1",2
GO:0061383,"GO:0061383","trabecula morphogenesis","2/649","32/11852",0.529547968388674,0.529547968388674,0.946364081323391,"MED1/CHD7",2
GO:0071470,"GO:0071470","cellular response to osmotic stress","2/649","32/11852",0.529547968388674,0.529547968388674,0.946364081323391,"LETM1/TSPO",2
GO:2000351,"GO:2000351","regulation of endothelial cell apoptotic process","2/649","32/11852",0.529547968388674,0.529547968388674,0.946364081323391,"THBS1/TNIP2",2
GO:0003231,"GO:0003231","cardiac ventricle development","5/649","88/11852",0.53187489233769,0.53187489233769,0.946364081323391,"PKP2/SEMA3C/MED1/TPM1/CHD7",5
GO:0002042,"GO:0002042","cell migration involved in sprouting angiogenesis","3/649","51/11852",0.534532389131922,0.534532389131922,0.946364081323391,"THBS1/PLK2/FBXW7",3
GO:0036297,"GO:0036297","interstrand cross-link repair","3/649","51/11852",0.534532389131922,0.534532389131922,0.946364081323391,"MSH6/RPA2/UBA52",3
GO:0042102,"GO:0042102","positive regulation of T cell proliferation","3/649","51/11852",0.534532389131922,0.534532389131922,0.946364081323391,"DNAJA3/PNP/RPS3",3
GO:0046209,"GO:0046209","nitric oxide metabolic process","3/649","51/11852",0.534532389131922,0.534532389131922,0.946364081323391,"KHSRP/DDAH1/TSPO",3
GO:1904377,"GO:1904377","positive regulation of protein localization to cell periphery","3/649","51/11852",0.534532389131922,0.534532389131922,0.946364081323391,"EZR/GNAI1/RACK1",3
GO:0070302,"GO:0070302","regulation of stress-activated protein kinase signaling cascade","10/649","181/11852",0.535032617559101,0.535032617559101,0.946364081323391,"MAP3K4/DNAJA1/EZR/TRAF2/RIPK1/DVL3/ERCC6/PRMT1/RPS3/ZNF622",10
GO:1904951,"GO:1904951","positive regulation of establishment of protein localization","18/649","329/11852",0.536802718110679,0.536802718110679,0.946364081323391,"USP36/HUWE1/PPP1R13B/EZR/XBP1/MIEF1/E2F1/ZPR1/DKC1/SYBU/SEC16A/ANKRD1/FLNA/TFDP1/HYAL2/FBXW7/CCT6A/RACK1",18
GO:0008645,"GO:0008645","hexose transmembrane transport","4/649","70/11852",0.538521135002158,0.538521135002158,0.946364081323391,"HK2/PEA15/FABP5/IRS1",4
GO:0045471,"GO:0045471","response to ethanol","4/649","70/11852",0.538521135002158,0.538521135002158,0.946364081323391,"TNC/SETD7/EIF4EBP1/RPL10A",4
GO:1903409,"GO:1903409","reactive oxygen species biosynthetic process","4/649","70/11852",0.538521135002158,0.538521135002158,0.946364081323391,"KHSRP/DDAH1/TSPO/TRAP1",4
GO:0051235,"GO:0051235","maintenance of location","13/649","237/11852",0.538555183910461,0.538555183910461,0.946364081323391,"HSPA5/SCARB1/EZR/FLNB/HK2/LETM1/CHD7/DDIT3/FLNA/TSPO/FBXW7/SPOUT1/TMSB4X",13
GO:0034764,"GO:0034764","positive regulation of transmembrane transport","7/649","126/11852",0.539763142990846,0.539763142990846,0.946364081323391,"WNK1/ACTN4/CNKSR3/FLNA/IRS1/CA2/TMSB4X",7
GO:0007569,"GO:0007569","cell aging","5/649","89/11852",0.542042771136926,0.542042771136926,0.946364081323391,"DNAJA3/HMGA1/ULK3/PLK2/RSL1D1",5
GO:0017015,"GO:0017015","regulation of transforming growth factor beta receptor signaling pathway","5/649","89/11852",0.542042771136926,0.542042771136926,0.946364081323391,"HSPA5/THBS1/ZBTB7A/PEG10/UBA52",5
GO:0043903,"GO:0043903","regulation of symbiosis, encompassing mutualism through parasitism","10/649","182/11852",0.542158261894103,0.542158261894103,0.946364081323391,"CCNK/CHMP4B/TRIM35/DDX5/ZFP36/ILF3/JUN/IFITM2/TRIM27/PPIE",10
GO:0022604,"GO:0022604","regulation of cell morphogenesis","20/649","367/11852",0.542524888791188,0.542524888791188,0.946364081323391,"WDR1/SEMA3C/EZR/MYH9/ARHGEF7/ANKRD27/C1QBP/CORO1C/RND3/ACTN4/WDR36/TPM1/MSN/CDC42EP2/ALDOA/DVL3/NDEL1/BDNF/FLNA/TNFRSF12A",20
GO:0046328,"GO:0046328","regulation of JNK cascade","8/649","145/11852",0.54315708508635,0.54315708508635,0.946364081323391,"MAP3K4/DNAJA1/TRAF2/RIPK1/DVL3/ERCC6/RPS3/ZNF622",8
GO:0006520,"GO:0006520","cellular amino acid metabolic process","15/649","275/11852",0.544635293596271,0.544635293596271,0.946364081323391,"PSME4/CAD/MTHFD1/SLC7A6/OGDH/ATF4/DDAH1/GART/CTPS1/GATC/PHGDH/ODC1/YARS2/PSMA5/PYCR1",15
GO:0001516,"GO:0001516","prostaglandin biosynthetic process","1/649","14/11852",0.545635511508619,0.545635511508619,0.946364081323391,"FABP5",1
GO:0002726,"GO:0002726","positive regulation of T cell cytokine production","1/649","14/11852",0.545635511508619,0.545635511508619,0.946364081323391,"TRAF2",1
GO:0006474,"GO:0006474","N-terminal protein amino acid acetylation","1/649","14/11852",0.545635511508619,0.545635511508619,0.946364081323391,"NAA25",1
GO:0006577,"GO:0006577","amino-acid betaine metabolic process","1/649","14/11852",0.545635511508619,0.545635511508619,0.946364081323391,"CHDH",1
GO:0007252,"GO:0007252","I-kappaB phosphorylation","1/649","14/11852",0.545635511508619,0.545635511508619,0.946364081323391,"TRAF2",1
GO:0007289,"GO:0007289","spermatid nucleus differentiation","1/649","14/11852",0.545635511508619,0.545635511508619,0.946364081323391,"PSME4",1
GO:0008090,"GO:0008090","retrograde axonal transport","1/649","14/11852",0.545635511508619,0.545635511508619,0.946364081323391,"NDEL1",1
GO:0009263,"GO:0009263","deoxyribonucleotide biosynthetic process","1/649","14/11852",0.545635511508619,0.545635511508619,0.946364081323391,"GUK1",1
GO:0010310,"GO:0010310","regulation of hydrogen peroxide metabolic process","1/649","14/11852",0.545635511508619,0.545635511508619,0.946364081323391,"NOXO1",1
GO:0010842,"GO:0010842","retina layer formation","1/649","14/11852",0.545635511508619,0.545635511508619,0.946364081323391,"RDH13",1
GO:0010954,"GO:0010954","positive regulation of protein processing","1/649","14/11852",0.545635511508619,0.545635511508619,0.946364081323391,"MYH9",1
GO:0010984,"GO:0010984","regulation of lipoprotein particle clearance","1/649","14/11852",0.545635511508619,0.545635511508619,0.946364081323391,"KHSRP",1
GO:0016973,"GO:0016973","poly(A)+ mRNA export from nucleus","1/649","14/11852",0.545635511508619,0.545635511508619,0.946364081323391,"NXF1",1
GO:0018149,"GO:0018149","peptide cross-linking","1/649","14/11852",0.545635511508619,0.545635511508619,0.946364081323391,"THBS1",1
GO:0031268,"GO:0031268","pseudopodium organization","1/649","14/11852",0.545635511508619,0.545635511508619,0.946364081323391,"CDC42EP2",1
GO:0031290,"GO:0031290","retinal ganglion cell axon guidance","1/649","14/11852",0.545635511508619,0.545635511508619,0.946364081323391,"RPL24",1
GO:0031640,"GO:0031640","killing of cells of other organism","1/649","14/11852",0.545635511508619,0.545635511508619,0.946364081323391,"RPS19",1
GO:0031998,"GO:0031998","regulation of fatty acid beta-oxidation","1/649","14/11852",0.545635511508619,0.545635511508619,0.946364081323391,"IRS1",1
GO:0032486,"GO:0032486","Rap protein signal transduction","1/649","14/11852",0.545635511508619,0.545635511508619,0.946364081323391,"PLK2",1
GO:0034114,"GO:0034114","regulation of heterotypic cell-cell adhesion","1/649","14/11852",0.545635511508619,0.545635511508619,0.946364081323391,"WNK1",1
GO:0034134,"GO:0034134","toll-like receptor 2 signaling pathway","1/649","14/11852",0.545635511508619,0.545635511508619,0.946364081323391,"TNIP2",1
GO:0034755,"GO:0034755","iron ion transmembrane transport","1/649","14/11852",0.545635511508619,0.545635511508619,0.946364081323391,"SLC39A14",1
GO:0035162,"GO:0035162","embryonic hemopoiesis","1/649","14/11852",0.545635511508619,0.545635511508619,0.946364081323391,"MED1",1
GO:0035584,"GO:0035584","calcium-mediated signaling using intracellular calcium source","1/649","14/11852",0.545635511508619,0.545635511508619,0.946364081323391,"ADGRL1",1
GO:0035728,"GO:0035728","response to hepatocyte growth factor","1/649","14/11852",0.545635511508619,0.545635511508619,0.946364081323391,"MED1",1
GO:0036336,"GO:0036336","dendritic cell migration","1/649","14/11852",0.545635511508619,0.545635511508619,0.946364081323391,"C1QBP",1
GO:0042036,"GO:0042036","negative regulation of cytokine biosynthetic process","1/649","14/11852",0.545635511508619,0.545635511508619,0.946364081323391,"ZFP36",1
GO:0042402,"GO:0042402","cellular biogenic amine catabolic process","1/649","14/11852",0.545635511508619,0.545635511508619,0.946364081323391,"CHDH",1
GO:0043101,"GO:0043101","purine-containing compound salvage","1/649","14/11852",0.545635511508619,0.545635511508619,0.946364081323391,"PNP",1
GO:0043174,"GO:0043174","nucleoside salvage","1/649","14/11852",0.545635511508619,0.545635511508619,0.946364081323391,"UCK2",1
GO:0044058,"GO:0044058","regulation of digestive system process","1/649","14/11852",0.545635511508619,0.545635511508619,0.946364081323391,"WNK1",1
GO:0044364,"GO:0044364","disruption of cells of other organism","1/649","14/11852",0.545635511508619,0.545635511508619,0.946364081323391,"RPS19",1
GO:0045649,"GO:0045649","regulation of macrophage differentiation","1/649","14/11852",0.545635511508619,0.545635511508619,0.946364081323391,"RIPK1",1
GO:0045780,"GO:0045780","positive regulation of bone resorption","1/649","14/11852",0.545635511508619,0.545635511508619,0.946364081323391,"CA2",1
GO:0046457,"GO:0046457","prostanoid biosynthetic process","1/649","14/11852",0.545635511508619,0.545635511508619,0.946364081323391,"FABP5",1
GO:0046852,"GO:0046852","positive regulation of bone remodeling","1/649","14/11852",0.545635511508619,0.545635511508619,0.946364081323391,"CA2",1
GO:0046940,"GO:0046940","nucleoside monophosphate phosphorylation","1/649","14/11852",0.545635511508619,0.545635511508619,0.946364081323391,"AK2",1
GO:0048268,"GO:0048268","clathrin coat assembly","1/649","14/11852",0.545635511508619,0.545635511508619,0.946364081323391,"CLTB",1
GO:0048311,"GO:0048311","mitochondrion distribution","1/649","14/11852",0.545635511508619,0.545635511508619,0.946364081323391,"CLUH",1
GO:0048385,"GO:0048385","regulation of retinoic acid receptor signaling pathway","1/649","14/11852",0.545635511508619,0.545635511508619,0.946364081323391,"CNOT1",1
GO:0050857,"GO:0050857","positive regulation of antigen receptor-mediated signaling pathway","1/649","14/11852",0.545635511508619,0.545635511508619,0.946364081323391,"RPS3",1
GO:0050860,"GO:0050860","negative regulation of T cell receptor signaling pathway","1/649","14/11852",0.545635511508619,0.545635511508619,0.946364081323391,"EZR",1
GO:0051299,"GO:0051299","centrosome separation","1/649","14/11852",0.545635511508619,0.545635511508619,0.946364081323391,"NDEL1",1
GO:0070293,"GO:0070293","renal absorption","1/649","14/11852",0.545635511508619,0.545635511508619,0.946364081323391,"HYAL2",1
GO:0090023,"GO:0090023","positive regulation of neutrophil chemotaxis","1/649","14/11852",0.545635511508619,0.545635511508619,0.946364081323391,"C1QBP",1
GO:0090151,"GO:0090151","establishment of protein localization to mitochondrial membrane","1/649","14/11852",0.545635511508619,0.545635511508619,0.946364081323391,"TIMM13",1
GO:1900029,"GO:1900029","positive regulation of ruffle assembly","1/649","14/11852",0.545635511508619,0.545635511508619,0.946364081323391,"NDEL1",1
GO:1903358,"GO:1903358","regulation of Golgi organization","1/649","14/11852",0.545635511508619,0.545635511508619,0.946364081323391,"RAB33B",1
GO:2000191,"GO:2000191","regulation of fatty acid transport","1/649","14/11852",0.545635511508619,0.545635511508619,0.946364081323391,"THBS1",1
GO:2001224,"GO:2001224","positive regulation of neuron migration","1/649","14/11852",0.545635511508619,0.545635511508619,0.946364081323391,"FLNA",1
GO:0015682,"GO:0015682","ferric iron transport","2/649","33/11852",0.546317952107996,0.546317952107996,0.946364081323391,"ATP6V1C2/ATP6V1B2",2
GO:0016572,"GO:0016572","histone phosphorylation","2/649","33/11852",0.546317952107996,0.546317952107996,0.946364081323391,"BAZ1B/AKAP8",2
GO:0021762,"GO:0021762","substantia nigra development","2/649","33/11852",0.546317952107996,0.546317952107996,0.946364081323391,"HSPA5/SEC16A",2
GO:0033146,"GO:0033146","regulation of intracellular estrogen receptor signaling pathway","2/649","33/11852",0.546317952107996,0.546317952107996,0.946364081323391,"CNOT1/MED1",2
GO:0034113,"GO:0034113","heterotypic cell-cell adhesion","2/649","33/11852",0.546317952107996,0.546317952107996,0.946364081323391,"PKP2/WNK1",2
GO:0051445,"GO:0051445","regulation of meiotic cell cycle","2/649","33/11852",0.546317952107996,0.546317952107996,0.946364081323391,"CDC25A/METTL3",2
GO:0072512,"GO:0072512","trivalent inorganic cation transport","2/649","33/11852",0.546317952107996,0.546317952107996,0.946364081323391,"ATP6V1C2/ATP6V1B2",2
GO:1903115,"GO:1903115","regulation of actin filament-based movement","2/649","33/11852",0.546317952107996,0.546317952107996,0.946364081323391,"PKP2/FLNA",2
GO:0032870,"GO:0032870","cellular response to hormone stimulus","27/649","497/11852",0.546547628309815,0.546547628309815,0.946364081323391,"TNC/PKM/DNAJA1/DDX18/XBP1/APEX1/AKAP8/DDX5/CNOT1/MED1/ZFP36/BCL2L2/SAFB2/LANCL2/ATP6V1C2/MSN/SAFB/NDEL1/JUN/ZBTB7A/EIF4EBP1/RBM14/IRS1/CA2/ATP6V1B2/IGFBP7/ESRRA",27
GO:0002690,"GO:0002690","positive regulation of leukocyte chemotaxis","3/649","52/11852",0.547820275253738,0.547820275253738,0.946364081323391,"WNK1/C1QBP/THBS1",3
GO:0014909,"GO:0014909","smooth muscle cell migration","3/649","52/11852",0.547820275253738,0.547820275253738,0.946364081323391,"APEX1/PLAU/TPM1",3
GO:0048278,"GO:0048278","vesicle docking","3/649","52/11852",0.547820275253738,0.547820275253738,0.946364081323391,"YKT6/SCFD2/RABEPK",3
GO:0050818,"GO:0050818","regulation of coagulation","3/649","52/11852",0.547820275253738,0.547820275253738,0.946364081323391,"PLAUR/PLAU/THBS1",3
GO:0060350,"GO:0060350","endochondral bone morphogenesis","3/649","52/11852",0.547820275253738,0.547820275253738,0.946364081323391,"MEF2D/COL7A1/NAB2",3
GO:1902110,"GO:1902110","positive regulation of mitochondrial membrane permeability involved in apoptotic process","3/649","52/11852",0.547820275253738,0.547820275253738,0.946364081323391,"PPP1R13B/E2F1/TFDP1",3
GO:0009267,"GO:0009267","cellular response to starvation","7/649","127/11852",0.548256261840927,0.548256261840927,0.946364081323391,"HSPA5/XBP1/ATF4/MYBBP1A/EIF2S1/JUN/WDR45B",7
GO:1904018,"GO:1904018","positive regulation of vasculature development","7/649","127/11852",0.548256261840927,0.548256261840927,0.946364081323391,"PKM/XBP1/THBS1/PLK2/ADM/DDAH1/HK2",7
GO:0015749,"GO:0015749","monosaccharide transmembrane transport","4/649","71/11852",0.549866355237325,0.549866355237325,0.946364081323391,"HK2/PEA15/FABP5/IRS1",4
GO:0019319,"GO:0019319","hexose biosynthetic process","4/649","71/11852",0.549866355237325,0.549866355237325,0.946364081323391,"ATF4/SORD/ALDOA/WDR5",4
GO:0048704,"GO:0048704","embryonic skeletal system morphogenesis","4/649","71/11852",0.549866355237325,0.549866355237325,0.946364081323391,"MTHFD1/MTHFD1L/IRX5/EIF4A3",4
GO:0042692,"GO:0042692","muscle cell differentiation","13/649","239/11852",0.551003772692624,0.551003772692624,0.946364081323391,"PTBP1/WDR1/XBP1/MYH9/SUPT6H/RBM38/MYOF/TPM1/ANKRD1/ADM/KRT8/BDNF/ACTG1",13
GO:0002040,"GO:0002040","sprouting angiogenesis","5/649","90/11852",0.552106271693322,0.552106271693322,0.946364081323391,"EPN1/PKM/THBS1/PLK2/FBXW7",5
GO:0002285,"GO:0002285","lymphocyte activation involved in immune response","6/649","109/11852",0.554398343469286,0.554398343469286,0.946364081323391,"UNG/CDH17/XBP1/SUPT6H/MSH6/RPS6",6
GO:0006732,"GO:0006732","coenzyme metabolic process","18/649","333/11852",0.557985957315236,0.557985957315236,0.946364081323391,"NUP160/PKM/TIGAR/NUP50/MTHFD1/OGDH/NUP98/MTHFD1L/UBIAD1/NUP153/ALDOA/GART/HK2/ZBTB7A/THTPA/ACLY/PMVK/EIF6",18
GO:0007033,"GO:0007033","vacuole organization","8/649","147/11852",0.558932041670984,0.558932041670984,0.946364081323391,"CHMP4B/TBC1D14/ULK3/RAB33B/SCARB2/ATG101/EMC6/WDR45B",8
GO:0046470,"GO:0046470","phosphatidylcholine metabolic process","3/649","53/11852",0.560883123141437,0.560883123141437,0.946364081323391,"SCARB1/FABP5/MFSD2A",3
GO:0048608,"GO:0048608","reproductive structure development","17/649","315/11852",0.560967914703164,0.560967914703164,0.946364081323391,"TNC/HSPA5/MAP3K4/MED1/BCL2L2/SAFB2/NASP/ADM/SF1/KRT8/CHD7/FOSL1/IRX5/FLNA/WDR77/RPS6/CEBPA",17
GO:0060218,"GO:0060218","hematopoietic stem cell differentiation","4/649","72/11852",0.561063555178227,0.561063555178227,0.946364081323391,"PSME4/HSPA9/METTL3/PSMA5",4
GO:0045333,"GO:0045333","cellular respiration","9/649","166/11852",0.561135770670098,0.561135770670098,0.946364081323391,"OGDH/MYBBP1A/AFG1L/UQCRB/TRAP1/TBRG4/NDUFB11/NDUFB9/UQCC3",9
GO:0070661,"GO:0070661","leukocyte proliferation","9/649","166/11852",0.561135770670098,0.561135770670098,0.946364081323391,"ELF4/DNAJA3/MSN/CTPS1/IMPDH2/PNP/SDC4/RPS6/RPS3",9
GO:1901605,"GO:1901605","alpha-amino acid metabolic process","9/649","166/11852",0.561135770670098,0.561135770670098,0.946364081323391,"CAD/MTHFD1/OGDH/DDAH1/GART/CTPS1/PHGDH/ODC1/PYCR1",9
GO:1903844,"GO:1903844","regulation of cellular response to transforming growth factor beta stimulus","5/649","91/11852",0.562061211257014,0.562061211257014,0.946364081323391,"HSPA5/THBS1/ZBTB7A/PEG10/UBA52",5
GO:0000413,"GO:0000413","protein peptidyl-prolyl isomerization","2/649","34/11852",0.562665280873397,0.562665280873397,0.946364081323391,"PPIF/PPIE",2
GO:0006084,"GO:0006084","acetyl-CoA metabolic process","2/649","34/11852",0.562665280873397,0.562665280873397,0.946364081323391,"ACLY/PMVK",2
GO:0006101,"GO:0006101","citrate metabolic process","2/649","34/11852",0.562665280873397,0.562665280873397,0.946364081323391,"OGDH/ACLY",2
GO:0007099,"GO:0007099","centriole replication","2/649","34/11852",0.562665280873397,0.562665280873397,0.946364081323391,"PLK2/RBM14",2
GO:0043124,"GO:0043124","negative regulation of I-kappaB kinase/NF-kappaB signaling","2/649","34/11852",0.562665280873397,0.562665280873397,0.946364081323391,"USP10/RIPK1",2
GO:0043616,"GO:0043616","keratinocyte proliferation","2/649","34/11852",0.562665280873397,0.562665280873397,0.946364081323391,"MED1/ZFP36",2
GO:0045912,"GO:0045912","negative regulation of carbohydrate metabolic process","2/649","34/11852",0.562665280873397,0.562665280873397,0.946364081323391,"TIGAR/COX11",2
GO:0051181,"GO:0051181","cofactor transport","2/649","34/11852",0.562665280873397,0.562665280873397,0.946364081323391,"SLC25A19/SLC25A17",2
GO:0061028,"GO:0061028","establishment of endothelial barrier","2/649","34/11852",0.562665280873397,0.562665280873397,0.946364081323391,"EZR/MSN",2
GO:0090303,"GO:0090303","positive regulation of wound healing","2/649","34/11852",0.562665280873397,0.562665280873397,0.946364081323391,"XBP1/THBS1",2
GO:0097502,"GO:0097502","mannosylation","2/649","34/11852",0.562665280873397,0.562665280873397,0.946364081323391,"FKRP/SDF2L1",2
GO:0098900,"GO:0098900","regulation of action potential","2/649","34/11852",0.562665280873397,0.562665280873397,0.946364081323391,"PKP2/FLNA",2
GO:1902743,"GO:1902743","regulation of lamellipodium organization","2/649","34/11852",0.562665280873397,0.562665280873397,0.946364081323391,"ARHGEF7/CORO1C",2
GO:1902893,"GO:1902893","regulation of pri-miRNA transcription by RNA polymerase II","2/649","34/11852",0.562665280873397,0.562665280873397,0.946364081323391,"GNL3/JUN",2
GO:2000785,"GO:2000785","regulation of autophagosome assembly","2/649","34/11852",0.562665280873397,0.562665280873397,0.946364081323391,"CHMP4B/TBC1D14",2
GO:0032386,"GO:0032386","regulation of intracellular transport","18/649","334/11852",0.563232062891763,0.563232062891763,0.946364081323391,"USP36/HUWE1/EZR/MIEF1/SUPT6H/ZPR1/WWC1/XPO5/NUP153/MSN/SEC16A/CACNA1D/NOLC1/NDEL1/FLNA/HYAL2/FBXW7/UBE2G2",18
GO:0015893,"GO:0015893","drug transport","6/649","110/11852",0.563449893676239,0.563449893676239,0.946364081323391,"SLC7A5/SLC1A5/SLC25A19/SLC25A38/SLC25A17/CA2",6
GO:0032273,"GO:0032273","positive regulation of protein polymerization","6/649","110/11852",0.563449893676239,0.563449893676239,0.946364081323391,"ARPC5L/CDC42EP2/TRIM27/ARPC1B/RPS3/DRG1",6
GO:0071219,"GO:0071219","cellular response to molecule of bacterial origin","7/649","129/11852",0.565038891570575,0.565038891570575,0.946364081323391,"SCARB1/XBP1/AKAP8/ZFP36/ANKRD1/TSPO/TNIP2",7
GO:0098813,"GO:0098813","nuclear chromosome segregation","12/649","223/11852",0.567445094696371,0.567445094696371,0.946364081323391,"ZNF207/CHMP4B/AKAP8/KPNB1/CDCA5/RRS1/PINX1/CCNB1IP1/FBXW7/P3H4/FEN1/MCMBP",12
GO:0043281,"GO:0043281","regulation of cysteine-type endopeptidase activity involved in apoptotic process","9/649","167/11852",0.568477711281669,0.568477711281669,0.946364081323391,"PLAUR/NLE1/TNFRSF10B/TRAF2/RIPK1/THBS1/PDCD2/RPS3/RACK1",9
GO:2001020,"GO:2001020","regulation of response to DNA damage stimulus","10/649","186/11852",0.570245269528937,0.570245269528937,0.946364081323391,"TIGAR/DDX5/ANKRD1/CCAR2/ERCC6/RPA2/AUNIP/RPS3/SETMAR/PTTG1IP",10
GO:0071363,"GO:0071363","cellular response to growth factor stimulus","26/649","484/11852",0.570512369199148,0.570512369199148,0.946364081323391,"PTBP1/HSPA5/CAD/E2F1/EHD4/DDX5/ZPR1/NCL/MED1/ZFP36/RIPK1/THBS1/MYOF/PCSK6/ANKRD1/MCM7/UBE2O/BDNF/JUN/ZBTB7A/PEG10/HYAL2/EIF4A3/RPS3/RACK1/UBA52",26
GO:0001916,"GO:0001916","positive regulation of T cell mediated cytotoxicity","1/649","15/11852",0.570545340282981,0.570545340282981,0.946364081323391,"PVR",1
GO:0001956,"GO:0001956","positive regulation of neurotransmitter secretion","1/649","15/11852",0.570545340282981,0.570545340282981,0.946364081323391,"CACNA1D",1
GO:0006098,"GO:0006098","pentose-phosphate shunt","1/649","15/11852",0.570545340282981,0.570545340282981,0.946364081323391,"TIGAR",1
GO:0006103,"GO:0006103","2-oxoglutarate metabolic process","1/649","15/11852",0.570545340282981,0.570545340282981,0.946364081323391,"OGDH",1
GO:0006123,"GO:0006123","mitochondrial electron transport, cytochrome c to oxygen","1/649","15/11852",0.570545340282981,0.570545340282981,0.946364081323391,"AFG1L",1
GO:0006390,"GO:0006390","mitochondrial transcription","1/649","15/11852",0.570545340282981,0.570545340282981,0.946364081323391,"TWNK",1
GO:0006706,"GO:0006706","steroid catabolic process","1/649","15/11852",0.570545340282981,0.570545340282981,0.946364081323391,"SCARB1",1
GO:0006750,"GO:0006750","glutathione biosynthetic process","1/649","15/11852",0.570545340282981,0.570545340282981,0.946364081323391,"CHAC1",1
GO:0007398,"GO:0007398","ectoderm development","1/649","15/11852",0.570545340282981,0.570545340282981,0.946364081323391,"ETS2",1
GO:0007628,"GO:0007628","adult walking behavior","1/649","15/11852",0.570545340282981,0.570545340282981,0.946364081323391,"CHD7",1
GO:0009310,"GO:0009310","amine catabolic process","1/649","15/11852",0.570545340282981,0.570545340282981,0.946364081323391,"CHDH",1
GO:0010226,"GO:0010226","response to lithium ion","1/649","15/11852",0.570545340282981,0.570545340282981,0.946364081323391,"CEBPA",1
GO:0010575,"GO:0010575","positive regulation of vascular endothelial growth factor production","1/649","15/11852",0.570545340282981,0.570545340282981,0.946364081323391,"ATF4",1
GO:0010766,"GO:0010766","negative regulation of sodium ion transport","1/649","15/11852",0.570545340282981,0.570545340282981,0.946364081323391,"WNK1",1
GO:0010818,"GO:0010818","T cell chemotaxis","1/649","15/11852",0.570545340282981,0.570545340282981,0.946364081323391,"WNK1",1
GO:0015936,"GO:0015936","coenzyme A metabolic process","1/649","15/11852",0.570545340282981,0.570545340282981,0.946364081323391,"ACLY",1
GO:0019646,"GO:0019646","aerobic electron transport chain","1/649","15/11852",0.570545340282981,0.570545340282981,0.946364081323391,"AFG1L",1
GO:0030011,"GO:0030011","maintenance of cell polarity","1/649","15/11852",0.570545340282981,0.570545340282981,0.946364081323391,"WDR1",1
GO:0030397,"GO:0030397","membrane disassembly","1/649","15/11852",0.570545340282981,0.570545340282981,0.946364081323391,"NDEL1",1
GO:0030952,"GO:0030952","establishment or maintenance of cytoskeleton polarity","1/649","15/11852",0.570545340282981,0.570545340282981,0.946364081323391,"RND3",1
GO:0032104,"GO:0032104","regulation of response to extracellular stimulus","1/649","15/11852",0.570545340282981,0.570545340282981,0.946364081323391,"MED1",1
GO:0032107,"GO:0032107","regulation of response to nutrient levels","1/649","15/11852",0.570545340282981,0.570545340282981,0.946364081323391,"MED1",1
GO:0032516,"GO:0032516","positive regulation of phosphoprotein phosphatase activity","1/649","15/11852",0.570545340282981,0.570545340282981,0.946364081323391,"PPP1R15A",1
GO:0032988,"GO:0032988","ribonucleoprotein complex disassembly","1/649","15/11852",0.570545340282981,0.570545340282981,0.946364081323391,"MRRF",1
GO:0034349,"GO:0034349","glial cell apoptotic process","1/649","15/11852",0.570545340282981,0.570545340282981,0.946364081323391,"TRAF2",1
GO:0034695,"GO:0034695","response to prostaglandin E","1/649","15/11852",0.570545340282981,0.570545340282981,0.946364081323391,"AKAP8",1
GO:0035313,"GO:0035313","wound healing, spreading of epidermal cells","1/649","15/11852",0.570545340282981,0.570545340282981,0.946364081323391,"AJUBA",1
GO:0035493,"GO:0035493","SNARE complex assembly","1/649","15/11852",0.570545340282981,0.570545340282981,0.946364081323391,"ANKRD27",1
GO:0038111,"GO:0038111","interleukin-7-mediated signaling pathway","1/649","15/11852",0.570545340282981,0.570545340282981,0.946364081323391,"IRS1",1
GO:0042454,"GO:0042454","ribonucleoside catabolic process","1/649","15/11852",0.570545340282981,0.570545340282981,0.946364081323391,"PNP",1
GO:0042921,"GO:0042921","glucocorticoid receptor signaling pathway","1/649","15/11852",0.570545340282981,0.570545340282981,0.946364081323391,"RBM14",1
GO:0045117,"GO:0045117","azole transport","1/649","15/11852",0.570545340282981,0.570545340282981,0.946364081323391,"SLC25A19",1
GO:0045761,"GO:0045761","regulation of adenylate cyclase activity","1/649","15/11852",0.570545340282981,0.570545340282981,0.946364081323391,"CACNA1D",1
GO:0045956,"GO:0045956","positive regulation of calcium ion-dependent exocytosis","1/649","15/11852",0.570545340282981,0.570545340282981,0.946364081323391,"CACNA1D",1
[truncated: 2,053 more rows]

## Sheet: GSEA_HspecUP
,"ID","Description","GeneRatio","BgRatio","pvalue","p.adjust","qvalue","geneID","Count"
GO:0031396,"GO:0031396","regulation of protein ubiquitination","25/612","178/11852",4.72469185497594e-06,4.72469185497594e-06,0.00825604832039506,"ATG5/NDFIP2/UBE3A/WDR48/UBQLN1/OGT/BAG5/UBXN2A/SPRTN/CUL3/RIPK2/BIRC2/FBXO5/BAG2/MASTL/RPL5/PLAA/RNF111/FEM1B/PTEN/MTBP/SIAH2/PRMT3/FANCM/DCUN1D5",25
GO:0006695,"GO:0006695","cholesterol biosynthetic process","13/612","57/11852",4.88569395387571e-06,4.88569395387571e-06,0.00825604832039506,"FDFT1/HMGCS1/ACAT2/EBP/HMGCR/MSMO1/SQLE/SC5D/NFYB/INSIG2/HSD17B7/CNBP/SP1",13
GO:1902653,"GO:1902653","secondary alcohol biosynthetic process","13/612","58/11852",6.0040157471615e-06,6.0040157471615e-06,0.00825604832039506,"FDFT1/HMGCS1/ACAT2/EBP/HMGCR/MSMO1/SQLE/SC5D/NFYB/INSIG2/HSD17B7/CNBP/SP1",13
GO:0016126,"GO:0016126","sterol biosynthetic process","13/612","61/11852",1.08295658652485e-05,1.08295658652485e-05,0.0111687022699761,"FDFT1/HMGCS1/ACAT2/EBP/HMGCR/MSMO1/SQLE/SC5D/NFYB/INSIG2/HSD17B7/CNBP/SP1",13
GO:1903320,"GO:1903320","regulation of protein modification by small protein conjugation or removal","26/612","203/11852",1.66537695910468e-05,1.66537695910468e-05,0.0137402364268026,"NOP53/ATG5/NDFIP2/UBE3A/WDR48/UBQLN1/OGT/BAG5/UBXN2A/SPRTN/CUL3/RIPK2/BIRC2/FBXO5/BAG2/MASTL/RPL5/PLAA/RNF111/FEM1B/PTEN/MTBP/SIAH2/PRMT3/FANCM/DCUN1D5",26
GO:0006260,"GO:0006260","DNA replication","30/612","258/11852",2.58937897069961e-05,2.58937897069961e-05,0.0178031161160908,"BRIP1/MMS22L/E2F7/SLFN11/CCNE2/MCM9/EREG/CCNA2/RBBP4/RRM2/POLE2/SSBP1/RPA3/FBXO5/GMNN/RAD1/CACYBP/SET/DUT/RFC3/DSCC1/DNA2/BARD1/CHEK1/DONSON/RFC4/RMI2/FANCM/PRIM1/DBF4",30
GO:0031647,"GO:0031647","regulation of protein stability","28/612","241/11852",4.85877785978268e-05,4.85877785978268e-05,0.0286339104247945,"NOP53/VPS35/FBXW11/USP33/VHL/MDM2/BAG5/MDM4/LAMP2/CUL3/NLK/EP300/CTSH/STK3/CDC37L1/BAG2/PDCD10/RTN4/RPL5/KRAS/CCNH/ATP1B1/SAV1/PEX2/OTUD3/RNF139/PTEN/TAF9",28
GO:0050821,"GO:0050821","protein stabilization","20/612","147/11852",6.60004756661326e-05,6.60004756661326e-05,0.0340336663336281,"NOP53/USP33/VHL/BAG5/MDM4/LAMP2/NLK/EP300/STK3/CDC37L1/BAG2/PDCD10/RTN4/RPL5/CCNH/ATP1B1/SAV1/OTUD3/PTEN/TAF9",20
GO:0031570,"GO:0031570","DNA integrity checkpoint","20/612","150/11852",8.7976118353284e-05,8.7976118353284e-05,0.0366914955509153,"NOP53/BRIP1/E2F7/RINT1/MDM2/MDM4/CNOT7/EP300/MAPK14/RAD1/RNASEH2B/MDC1/DNA2/CHEK1/HMGA2/CNOT8/DONSON/NAE1/RPL26/FEM1B",20
GO:1901796,"GO:1901796","regulation of signal transduction by p53 class mediator","21/612","162/11852",8.9319499067023e-05,8.9319499067023e-05,0.0366914955509153,"NOP53/BRIP1/MDM2/RBBP4/MDM4/EP300/RPA3/MAPK14/RAD1/RPL5/RFC3/DNA2/BARD1/PMAIP1/CHEK1/RPL26/RFC4/ING2/RMI2/HDAC2/TAF9",21
GO:0000082,"GO:0000082","G1/S transition of mitotic cell cycle","26/612","226/11852",0.000105672011743331,0.000105672011743331,0.0366914955509153,"E2F7/SLFN11/CCNE2/MDM2/RRM2/MDM4/CNOT7/CUL3/EP300/POLE2/RPA3/FBXO5/GMNN/CCNH/TMEM14B/BRD4/CNOT8/LSM11/RPL26/PTEN/MTBP/PRIM1/DBF4/MNAT1/EIF4E/ADAM17",26
GO:0044843,"GO:0044843","cell cycle G1/S phase transition","27/612","239/11852",0.000106732087083551,0.000106732087083551,0.0366914955509153,"E2F7/SLFN11/CCNE2/MDM2/CCNA2/RRM2/MDM4/CNOT7/CUL3/EP300/POLE2/RPA3/FBXO5/GMNN/CCNH/TMEM14B/BRD4/CNOT8/LSM11/RPL26/PTEN/MTBP/PRIM1/DBF4/MNAT1/EIF4E/ADAM17",27
GO:2001020,"GO:2001020","regulation of response to DNA damage stimulus","22/612","186/11852",0.00023734845525411,0.00023734845525411,0.0674829052486819,"RINT1/MDM2/RNF169/RAD51AP1/FBXO5/TPT1/RNASEH2B/PMAIP1/MCL1/CHEK1/HMGA2/CEBPG/RPL26/USP1/PPP4R2/TERF2IP/ING2/FEM1B/KLHL15/RMI2/TAF9/UBE2V2",22
GO:0006283,"GO:0006283","transcription-coupled nucleotide-excision repair","12/612","71/11852",0.000251081664399994,0.000251081664399994,0.0674829052486819,"POLR2D/RBX1/EP300/RPA3/GTF2H3/RFC3/CCNH/POLR2K/RFC4/TCEA1/HMGN1/MNAT1",12
GO:0000077,"GO:0000077","DNA damage checkpoint","18/612","138/11852",0.000258527606459138,0.000258527606459138,0.0674829052486819,"NOP53/BRIP1/E2F7/RINT1/MDM2/MDM4/CNOT7/EP300/MAPK14/RAD1/RNASEH2B/MDC1/CHEK1/HMGA2/CNOT8/DONSON/RPL26/FEM1B",18
GO:0010498,"GO:0010498","proteasomal protein catabolic process","40/612","434/11852",0.000261735177285013,0.000261735177285013,0.0674829052486819,"RNF19A/KLHL20/NOP53/DNAJB9/FBXO45/ERLEC1/FBXW11/PPP2R5C/UBE3A/UBQLN1/MDM2/UGGT1/OGT/BAG5/UBXN2A/CUL3/PSMA4/CDC23/RBX1/PSMA3/USP14/PPP2CB/UBE2D3/BIRC2/FBXO5/FBXO9/BAG2/ARMC8/NUDT15/PLAA/PMAIP1/HSPA13/FBXO22/RNF139/KLHL15/SIAH2/SGTB/TAF9/PCNP/PSMD12",40
GO:0072331,"GO:0072331","signal transduction by p53 class mediator","26/612","241/11852",0.000298384500764681,0.000298384500764681,0.0724067404641973,"NOP53/BRIP1/E2F7/DDIT4/PERP/MDM2/RBBP4/MDM4/CNOT7/EP300/RPA3/MAPK14/RAD1/RPL5/RFC3/DNA2/BARD1/PMAIP1/CHEK1/CNOT8/RPL26/RFC4/ING2/RMI2/HDAC2/TAF9",26
GO:0008203,"GO:0008203","cholesterol metabolic process","15/612","106/11852",0.000342114786699291,0.000342114786699291,0.0784063069634222,"FDFT1/HMGCS1/ACAT2/EBP/SOAT1/HMGCR/MSMO1/SQLE/SC5D/NFYB/INSIG2/HSD17B7/NPC1/CNBP/SP1",15
GO:0046165,"GO:0046165","alcohol biosynthetic process","17/612","130/11852",0.000368730537790313,0.000368730537790313,0.0800584475124786,"FDFT1/HMGCS1/ACAT2/EBP/IMPAD1/HMGCR/MSMO1/SQLE/ASAH1/SC5D/NFYB/INSIG2/GCH1/HSD17B7/IPMK/CNBP/SP1",17
GO:0042769,"GO:0042769","DNA damage response, detection of DNA damage","8/612","37/11852",0.000491908980948462,0.000491908980948462,0.0930444337394116,"WDR48/MRPS35/RBX1/RPA3/RFC3/HMGA2/USP1/RFC4",8
GO:1902652,"GO:1902652","secondary alcohol metabolic process","15/612","110/11852",0.000512795275858451,0.000512795275858451,0.0930444337394116,"FDFT1/HMGCS1/ACAT2/EBP/SOAT1/HMGCR/MSMO1/SQLE/SC5D/NFYB/INSIG2/HSD17B7/NPC1/CNBP/SP1",15
GO:0043984,"GO:0043984","histone H4-K16 acetylation","6/612","21/11852",0.000515189691348423,0.000515189691348423,0.0930444337394116,"ATG5/KANSL1/KANSL1L/OGT/MSL2/MSL1",6
GO:0006261,"GO:0006261","DNA-dependent DNA replication","18/612","146/11852",0.000518760111560639,0.000518760111560639,0.0930444337394116,"MMS22L/E2F7/SLFN11/CCNE2/MCM9/POLE2/SSBP1/RPA3/FBXO5/GMNN/RFC3/DSCC1/DNA2/DONSON/RFC4/FANCM/PRIM1/DBF4",18
GO:0036294,"GO:0036294","cellular response to decreased oxygen levels","20/612","173/11852",0.000604222387376652,0.000604222387376652,0.100308563478149,"NOP53/BRIP1/EDN1/VHL/UBQLN1/MDM2/NPEPPS/CCNA2/MDM4/PSMA4/RBX1/EP300/PSMA3/EEF2K/EGLN1/PMAIP1/PDK1/PTEN/ERO1A/PSMD12",20
GO:0044786,"GO:0044786","cell cycle DNA replication","11/612","68/11852",0.000663711113239363,0.000663711113239363,0.100308563478149,"E2F7/POLE2/RPA3/FBXO5/GMNN/RFC3/DNA2/DONSON/RFC4/PRIM1/DBF4",11
GO:0006470,"GO:0006470","protein dephosphorylation","27/612","268/11852",0.000680575092259623,0.000680575092259623,0.100308563478149,"PPM1B/FBXW11/PPP2R5C/PPP2R1B/PPP1R15B/PDP1/PTPN23/PPP2CB/MINPP1/PPP6R3/RNGTT/PTP4A1/SET/MASTL/ARPP19/LGALS3/CTDSPL2/PPA2/PTPN14/PPP2R5E/PPP4R2/PPM1K/PTEN/PTPN2/PPP1CC/PPP3R1/URI1",27
GO:0006839,"GO:0006839","mitochondrial transport","23/612","214/11852",0.000689333465538419,0.000689333465538419,0.100308563478149,"VPS35/SLC25A24/NPEPPS/SLC25A32/HEBP2/PMPCB/UBE2D3/SLC25A16/TIMM10B/ABCB10/PMAIP1/TOMM70/FLVCR1/FZD5/GRPEL2/YWHAZ/YWHAG/DNAJC19/PPP3R1/DNAJC15/RHOT1/YWHAQ/MICU2",23
GO:0016579,"GO:0016579","protein deubiquitination","25/612","241/11852",0.000695190580259598,0.000695190580259598,0.100308563478149,"NOP53/USP33/WDR48/DESI2/MDM2/CCNA2/OGT/OTULIN/MDM4/PSMA4/EP300/PSMA3/YY1/USP14/BIRC2/STAM/BARD1/USP12/USP1/OTUD1/OTUD3/PTEN/SIAH2/RHOT1/PSMD12",25
GO:0031648,"GO:0031648","protein destabilization","8/612","39/11852",0.000715606933181092,0.000715606933181092,0.100308563478149,"VPS35/FBXW11/MDM2/CUL3/EP300/CTSH/PEX2/RNF139",8
GO:0071456,"GO:0071456","cellular response to hypoxia","19/612","163/11852",0.000741035582469466,0.000741035582469466,0.100308563478149,"NOP53/BRIP1/EDN1/VHL/UBQLN1/MDM2/NPEPPS/CCNA2/MDM4/PSMA4/RBX1/EP300/PSMA3/EGLN1/PMAIP1/PDK1/PTEN/ERO1A/PSMD12",19
GO:0006694,"GO:0006694","steroid biosynthetic process","16/612","126/11852",0.000753785964386701,0.000753785964386701,0.100308563478149,"FDFT1/HMGCS1/ACAT2/EBP/STARD4/HMGCR/MSMO1/SQLE/ASAH1/SC5D/NFYB/INSIG2/HSD17B7/HSD17B12/CNBP/SP1",16
GO:0043161,"GO:0043161","proteasome-mediated ubiquitin-dependent protein catabolic process","35/612","386/11852",0.000839759021845554,0.000839759021845554,0.106845297350151,"RNF19A/KLHL20/NOP53/DNAJB9/FBXO45/ERLEC1/FBXW11/PPP2R5C/UBE3A/UBQLN1/MDM2/OGT/BAG5/UBXN2A/CUL3/PSMA4/CDC23/RBX1/PSMA3/USP14/PPP2CB/UBE2D3/BIRC2/FBXO5/FBXO9/ARMC8/PLAA/HSPA13/FBXO22/KLHL15/SIAH2/SGTB/TAF9/PCNP/PSMD12",35
GO:0034508,"GO:0034508","centromere complex assembly","8/612","40/11852",0.000854707851984492,0.000854707851984492,0.106845297350151,"CENPL/RBBP4/CENPN/HELLS/ITGB3BP/CENPU/CENPH/MIS12",8
GO:0016125,"GO:0016125","sterol metabolic process","15/612","116/11852",0.000902543623708254,0.000902543623708254,0.108437586481863,"FDFT1/HMGCS1/ACAT2/EBP/SOAT1/HMGCR/MSMO1/SQLE/SC5D/NFYB/INSIG2/HSD17B7/NPC1/CNBP/SP1",15
GO:0090329,"GO:0090329","regulation of DNA-dependent DNA replication","9/612","50/11852",0.000920017798040815,0.000920017798040815,0.108437586481863,"E2F7/SLFN11/FBXO5/GMNN/RFC3/DSCC1/DONSON/RFC4/DBF4",9
GO:0006289,"GO:0006289","nucleotide-excision repair","14/612","105/11852",0.000977439244182777,0.000977439244182777,0.112005391752991,"BRIP1/POLR2D/RBX1/EP300/RPA3/GTF2H3/RFC3/CCNH/POLR2K/RNF111/RFC4/TCEA1/HMGN1/MNAT1",14
GO:0031055,"GO:0031055","chromatin remodeling at centromere","7/612","32/11852",0.00102704588827591,0.00102704588827591,0.114509042280321,"CENPL/RBBP4/CENPN/HELLS/ITGB3BP/CENPU/CENPH",7
GO:0000209,"GO:0000209","protein polyubiquitination","27/612","281/11852",0.00138792377615344,0.00138792377615344,0.150672389992946,"RNF19A/RC3H2/KLHL20/FBXW11/UBE3A/FBXO21/NPEPPS/KLHL3/CUL3/PSMA4/CDC23/RBX1/PSMA3/WSB1/UBE2D3/BIRC2/FBXO9/PLAA/BARD1/HERC5/RNF111/FBXO22/ZNRF2/SIAH2/CBFB/UBE2V2/PSMD12",27
GO:0006275,"GO:0006275","regulation of DNA replication","13/612","98/11852",0.0015368553265901,0.0015368553265901,0.162562375840934,"E2F7/SLFN11/EREG/CCNA2/FBXO5/GMNN/CACYBP/RFC3/DSCC1/DNA2/DONSON/RFC4/DBF4",13
GO:0071453,"GO:0071453","cellular response to oxygen levels","20/612","187/11852",0.00159654242357523,0.00159654242357523,0.164653940999772,"NOP53/BRIP1/EDN1/VHL/UBQLN1/MDM2/NPEPPS/CCNA2/MDM4/PSMA4/RBX1/EP300/PSMA3/EEF2K/EGLN1/PMAIP1/PDK1/PTEN/ERO1A/PSMD12",20
GO:1905897,"GO:1905897","regulation of response to endoplasmic reticulum stress","11/612","76/11852",0.00170748151146839,0.00170748151146839,0.170487628116949,"DNAJB9/EIF2AK3/FICD/ERLEC1/UBQLN1/PPP1R15B/USP14/DNAJC3/AGR2/PMAIP1/PTPN2",11
GO:0070646,"GO:0070646","protein modification by small protein removal","25/612","257/11852",0.00173576329723559,0.00173576329723559,0.170487628116949,"NOP53/USP33/WDR48/DESI2/MDM2/CCNA2/OGT/OTULIN/MDM4/PSMA4/EP300/PSMA3/YY1/USP14/BIRC2/STAM/BARD1/USP12/USP1/OTUD1/OTUD3/PTEN/SIAH2/RHOT1/PSMD12",25
GO:0050810,"GO:0050810","regulation of steroid biosynthetic process","10/612","66/11852",0.00192787591175205,0.00192787591175205,0.184953383063801,"FDFT1/HMGCS1/STARD4/HMGCR/SQLE/ASAH1/SC5D/NFYB/INSIG2/SP1",10
GO:0000079,"GO:0000079","regulation of cyclin-dependent protein serine/threonine kinase activity","12/612","89/11852",0.00199948465038865,0.00199948465038865,0.185799449332757,"CCNE2/CCNA2/CCNL1/CCNC/CCNG1/CCNI/CCNH/HERC5/CCNG2/PTEN/MNAT1/ADAM17",12
GO:0044774,"GO:0044774","mitotic DNA integrity checkpoint","13/612","101/11852",0.00202677378386715,0.00202677378386715,0.185799449332757,"NOP53/E2F7/RINT1/MDM2/MDM4/CNOT7/EP300/MDC1/HMGA2/CNOT8/DONSON/NAE1/RPL26",13
GO:0032201,"GO:0032201","telomere maintenance via semi-conservative replication","6/612","27/11852",0.00215734235071804,0.00215734235071804,0.193469672138764,"POLE2/RPA3/RFC3/DNA2/RFC4/PRIM1",6
GO:0000086,"GO:0000086","G2/M transition of mitotic cell cycle","23/612","234/11852",0.00228261881459157,0.00228261881459157,0.200349006369191,"NOP53/FBXW11/RINT1/CCNA2/HAUS3/PSMA4/ABCB1/RBX1/PSMA3/FBXO5/VPS4B/MASTL/ARPP19/CCNH/RNASEH2B/PHLDA1/BRD4/HMGA2/DONSON/NAE1/YWHAG/MNAT1/PSMD12",23
GO:0033260,"GO:0033260","nuclear DNA replication","9/612","57/11852",0.00239647904966161,0.00239647904966161,0.203261311252229,"POLE2/RPA3/GMNN/RFC3/DNA2/DONSON/RFC4/PRIM1/DBF4",9
GO:0043687,"GO:0043687","post-translational protein modification","27/612","292/11852",0.00241434397519553,0.00241434397519553,0.203261311252229,"KLHL20/KBTBD8/ATG5/FBXW11/RBBP5/CALU/DCAF8/VHL/FBXO21/KLHL3/DCAF16/CUL3/PSMA4/RBX1/PSMA3/DNAJC3/RAB2A/WSB1/FBXO9/DSCC1/RAB5A/ATG12/NAE1/FBXO22/FEM1B/KCTD7/PSMD12",27
GO:0044773,"GO:0044773","mitotic DNA damage checkpoint","12/612","92/11852",0.00265623941402799,0.00265623941402799,0.214856599867403,"NOP53/E2F7/RINT1/MDM2/MDM4/CNOT7/EP300/MDC1/HMGA2/CNOT8/DONSON/RPL26",12
GO:1904029,"GO:1904029","regulation of cyclin-dependent protein kinase activity","12/612","92/11852",0.00265623941402799,0.00265623941402799,0.214856599867403,"CCNE2/CCNA2/CCNL1/CCNC/CCNG1/CCNI/CCNH/HERC5/CCNG2/PTEN/MNAT1/ADAM17",12
GO:0006281,"GO:0006281","DNA repair","40/612","491/11852",0.00280083450921741,0.00280083450921741,0.21866764408141,"NOP53/BRIP1/MMS22L/MCM9/WDR48/POLR2D/RNF169/SPRTN/RBX1/EP300/POLE2/YY1/RPA3/UBE2D3/RAD51AP1/GTF2H3/RAD1/RFC3/CCNH/RNF138/MDC1/DNA2/BARD1/POLR2K/INIP/CHEK1/HMGA2/CEBPG/RNF111/USP1/PPP4R2/RFC4/TERF2IP/KLHL15/RMI2/TCEA1/FANCM/HMGN1/MNAT1/UBE2V2",40
GO:0044839,"GO:0044839","cell cycle G2/M phase transition","24/612","252/11852",0.00280936868576142,0.00280936868576142,0.21866764408141,"NOP53/FBXW11/RINT1/CCNA2/HAUS3/PSMA4/ABCB1/RBX1/PSMA3/FBXO5/VPS4B/MASTL/ARPP19/CCNH/RNASEH2B/PHLDA1/BRD4/CHEK1/HMGA2/DONSON/NAE1/YWHAG/MNAT1/PSMD12",24
GO:1901617,"GO:1901617","organic hydroxy compound biosynthetic process","19/612","183/11852",0.00289762956239779,0.00289762956239779,0.218816302736325,"FDFT1/HMGCS1/ACAT2/EBP/STARD4/VPS35/IMPAD1/HMGCR/MSMO1/SQLE/ASAH1/SC5D/NFYB/INSIG2/GCH1/HSD17B7/IPMK/CNBP/SP1",19
GO:0051438,"GO:0051438","regulation of ubiquitin-protein transferase activity","8/612","48/11852",0.00291736458738785,0.00291736458738785,0.218816302736325,"BAG5/FBXO5/BAG2/MASTL/RPL5/FEM1B/PTEN/DCUN1D5",8
GO:1903322,"GO:1903322","positive regulation of protein modification by small protein conjugation or removal","14/612","118/11852",0.00300788266482666,0.00300788266482666,0.221576920365708,"NOP53/NDFIP2/UBE3A/WDR48/UBQLN1/SPRTN/CUL3/RIPK2/BIRC2/MASTL/RNF111/PTEN/FANCM/DCUN1D5",14
GO:0006066,"GO:0006066","alcohol metabolic process","24/612","256/11852",0.00344238267244155,0.00344238267244155,0.240575156968169,"FDFT1/HMGCS1/ACAT2/EBP/SOAT1/IMPAD1/HMGCR/MSMO1/RDH11/SQLE/ASAH1/MINPP1/SC5D/NFYB/INSIG2/GCH1/HSD17B7/NPC1/IPMK/SYNJ1/CNBP/PTEN/SP1/CYP27C1",24
GO:0000729,"GO:0000729","DNA double-strand break processing","5/612","21/11852",0.003683908216256,0.003683908216256,0.240575156968169,"BRIP1/RNF138/DNA2/BARD1/UBE2V2",5
GO:1904666,"GO:1904666","regulation of ubiquitin protein ligase activity","5/612","21/11852",0.003683908216256,0.003683908216256,0.240575156968169,"FBXO5/BAG2/MASTL/RPL5/PTEN",5
GO:0046620,"GO:0046620","regulation of organ growth","10/612","72/11852",0.00371537117749705,0.00371537117749705,0.240575156968169,"EDN1/YBX3/YY1/STK3/BMPR1A/MAPK14/SERP1/SAV1/FLVCR1/PTEN",10
GO:0035967,"GO:0035967","cellular response to topologically incorrect protein","16/612","147/11852",0.00379006307617694,0.00379006307617694,0.240575156968169,"DNAJB9/EIF2AK3/FICD/UGGT1/PPP1R15B/CUL3/EP300/DNAJC3/AGR2/SERP1/CANX/SEC31A/HSPA13/KLHL15/PTPN2/ERO1A",16
GO:0001912,"GO:0001912","positive regulation of leukocyte mediated cytotoxicity","6/612","30/11852",0.00379399204020936,0.00379399204020936,0.240575156968169,"MICB/MICA/FAM49B/AP1G1/B2M/CADM1",6
GO:0006370,"GO:0006370","7-methylguanosine mRNA capping","6/612","30/11852",0.00379399204020936,0.00379399204020936,0.240575156968169,"POLR2D/GTF2H3/RNGTT/CCNH/POLR2K/MNAT1",6
GO:0034080,"GO:0034080","CENP-A containing nucleosome assembly","6/612","30/11852",0.00379399204020936,0.00379399204020936,0.240575156968169,"CENPL/RBBP4/CENPN/ITGB3BP/CENPU/CENPH",6
GO:0061641,"GO:0061641","CENP-A containing chromatin organization","6/612","30/11852",0.00379399204020936,0.00379399204020936,0.240575156968169,"CENPL/RBBP4/CENPN/ITGB3BP/CENPU/CENPH",6
GO:0045540,"GO:0045540","regulation of cholesterol biosynthetic process","7/612","40/11852",0.00397826026460363,0.00397826026460363,0.240575156968169,"FDFT1/HMGCS1/HMGCR/SQLE/SC5D/NFYB/SP1",7
GO:0106118,"GO:0106118","regulation of sterol biosynthetic process","7/612","40/11852",0.00397826026460363,0.00397826026460363,0.240575156968169,"FDFT1/HMGCS1/HMGCR/SQLE/SC5D/NFYB/SP1",7
GO:0010256,"GO:0010256","endomembrane system organization","31/612","363/11852",0.00407567550745217,0.00407567550745217,0.240575156968169,"EIF2AK3/VMP1/STX2/NUP155/BAG5/ARL6IP1/AGFG1/UBXN2A/PI4K2B/MPP5/ATP8B1/TMED2/RAB2A/WASL/GOLPH3/PDCD10/RTN4/VPS4B/ATL2/SERP1/STAM/SEC31A/TOR1AIP1/UGCG/SYNJ1/YWHAZ/TMEM170A/PTEN/TMEM38B/TMED5/ARL1",31
GO:0000075,"GO:0000075","cell cycle checkpoint","20/612","203/11852",0.00417143827640346,0.00417143827640346,0.240575156968169,"NOP53/BRIP1/E2F7/RINT1/MDM2/MDM4/CNOT7/EP300/MAPK14/RAD1/RNASEH2B/MDC1/DNA2/CHEK1/HMGA2/CNOT8/DONSON/NAE1/RPL26/FEM1B",20
GO:0065004,"GO:0065004","protein-DNA complex assembly","17/612","162/11852",0.00421997509814147,0.00421997509814147,0.240575156968169,"CENPL/RBBP4/CENPN/RBX1/RPA3/GTF2H3/GMNN/DR1/SET/HELLS/MED6/CCNH/ITGB3BP/CENPU/CENPH/MIS12/MNAT1",17
GO:0008654,"GO:0008654","phospholipid biosynthetic process","21/612","218/11852",0.00439240043556276,0.00439240043556276,0.240575156968169,"HMGCS1/IDH1/HEXB/SLC44A1/CPNE3/PI4K2B/DDHD2/CHPT1/SERINC1/PIK3R3/ACSL3/SELENOI/ETNK1/RAB5A/PYURF/SYNJ1/CDS1/PIGA/PTEN/TMEM38B/LPGAT1",21
GO:0046890,"GO:0046890","regulation of lipid biosynthetic process","15/612","136/11852",0.00439403064991032,0.00439403064991032,0.240575156968169,"FDFT1/HMGCS1/IDH1/STARD4/HMGCR/ADIPOR2/SQLE/ASAH1/SC5D/NFYB/ACSL3/INSIG2/ORMDL1/SP1/LPGAT1",15
GO:0010948,"GO:0010948","negative regulation of cell cycle process","27/612","305/11852",0.00440421673303774,0.00440421673303774,0.240575156968169,"NOP53/E2F7/SLFN11/APAF1/RINT1/MDM2/RBBP4/RRM2/MDM4/CNOT7/PSMA4/EED/RBX1/EP300/PSMA3/TRIM37/FBXO5/RAD1/CHEK1/HMGA2/CNOT8/DONSON/NAE1/RPL26/PTEN/MTBP/PSMD12",27
GO:0009452,"GO:0009452","7-methylguanosine RNA capping","6/612","31/11852",0.00450313828548752,0.00450313828548752,0.240575156968169,"POLR2D/GTF2H3/RNGTT/CCNH/POLR2K/MNAT1",6
GO:0036260,"GO:0036260","RNA capping","6/612","31/11852",0.00450313828548752,0.00450313828548752,0.240575156968169,"POLR2D/GTF2H3/RNGTT/CCNH/POLR2K/MNAT1",6
GO:0007005,"GO:0007005","mitochondrion organization","37/612","458/11852",0.00455426296169374,0.00455426296169374,0.240575156968169,"ATG5/VPS35/GABPB1/NPEPPS/GGCT/TTC19/HEBP2/FNIP2/MTFR1/DDHD2/PPP2CB/PMPCB/SSBP1/UBE2D3/GOLPH3/FASTKD3/TIMM10B/DNA2/PMAIP1/ATG12/TOMM70/FZD5/SLC25A46/GRPEL2/YWHAZ/YWHAG/TMEM70/NDUFB1/DNAJC19/VDAC1/PPP3R1/GCLM/TFAM/DNAJC15/RHOT1/YWHAQ/COX20",37
GO:0009615,"GO:0009615","response to virus","22/612","233/11852",0.0045754429501751,0.0045754429501751,0.240575156968169,"NOP53/PPM1B/DDIT4/SLFN11/IFIT1/MICB/MICA/RIOK3/CNOT7/DNAJC3/BIRC2/MAPK14/BST2/POLR3F/TPT1/RSAD2/CREBZF/HERC5/PMAIP1/HMGA2/URI1/LAMTOR5",22
GO:0043486,"GO:0043486","histone exchange","7/612","41/11852",0.00458840638524257,0.00458840638524257,0.240575156968169,"CENPL/RBBP4/CENPN/ACTR6/ITGB3BP/CENPU/CENPH",7
GO:0006999,"GO:0006999","nuclear pore organization","4/612","14/11852",0.00465203744695838,0.00465203744695838,0.240575156968169,"NUP133/RTN4/TMEM170A/NUP54",4
GO:0030968,"GO:0030968","endoplasmic reticulum unfolded protein response","13/612","111/11852",0.0046654023806024,0.0046654023806024,0.240575156968169,"DNAJB9/EIF2AK3/FICD/PPP1R15B/EP300/DNAJC3/AGR2/SERP1/CANX/SEC31A/HSPA13/PTPN2/ERO1A",13
GO:0006457,"GO:0006457","protein folding","19/612","192/11852",0.00491749599602442,0.00491749599602442,0.25044401310487,"GNAI3/UGGT1/BAG5/PFDN4/DNAJC3/CDC37L1/BAG2/CANX/HSPA13/VBP1/DNAJB4/GRPEL2/B2M/DNAJC21/NUDCD2/SELENOF/SGTB/ERO1A/DNAJC19",19
GO:2001233,"GO:2001233","regulation of apoptotic signaling pathway","28/612","323/11852",0.00503594795253709,0.00503594795253709,0.253348909191179,"DEDD2/EIF2AK3/GNAI3/APAF1/UBQLN1/MDM2/PPP2R1B/BAG5/YBX3/CTSH/STK3/LGALS3/TPT1/PMAIP1/MCL1/RPL26/YWHAZ/ING2/FEM1B/YWHAG/PTEN/PTPN2/SIAH2/PPP3R1/TAF9/GCLM/URI1/YWHAQ",28
GO:0097190,"GO:0097190","apoptotic signaling pathway","38/612","477/11852",0.00512123607965772,0.00512123607965772,0.254535500268593,"DEDD2/DDIT4/EIF2AK3/GNAI3/PERP/APAF1/UBQLN1/MDM2/PPP2R1B/BAG5/GGCT/CUL3/FNIP2/YBX3/EP300/CTSH/STK3/PDCD10/LGALS3/TPT1/PMAIP1/MCL1/PDK1/RPL26/YWHAZ/ING2/FEM1B/YWHAG/PTEN/PTPN2/SIAH2/ERO1A/PPP3R1/TAF9/GCLM/URI1/RHOT1/YWHAQ",38
GO:0008202,"GO:0008202","steroid metabolic process","20/612","207/11852",0.00518821693856384,0.00518821693856384,0.254794764188367,"FDFT1/HMGCS1/ACAT2/EBP/STARD4/SOAT1/HMGCR/MSMO1/ATP8B1/SQLE/ASAH1/SC5D/NFYB/INSIG2/HSD17B7/NPC1/HSD17B12/TIPARP/CNBP/SP1",20
GO:0031365,"GO:0031365","N-terminal protein amino acid modification","5/612","23/11852",0.00559326071021219,0.00559326071021219,0.271454968709865,"PPM1B/NMT2/EP300/NAA50/NAA30",5
GO:0031398,"GO:0031398","positive regulation of protein ubiquitination","12/612","101/11852",0.00573607977545306,0.00573607977545306,0.27335053372889,"NDFIP2/UBE3A/UBQLN1/SPRTN/CUL3/RIPK2/BIRC2/MASTL/RNF111/PTEN/FANCM/DCUN1D5",12
GO:0036293,"GO:0036293","response to decreased oxygen levels","25/612","282/11852",0.005899385524359,0.005899385524359,0.27335053372889,"NOP53/BRIP1/DDIT4/EDN1/APAF1/VHL/UBQLN1/MDM2/NPEPPS/CCNA2/MDM4/PSMA4/RBX1/EP300/PSMA3/EEF2K/BIRC2/EGLN1/PMAIP1/ATP1B1/PDK1/PTEN/ERO1A/ADAM17/PSMD12",25
GO:2001021,"GO:2001021","negative regulation of response to DNA damage stimulus","9/612","65/11852",0.00591079222136847,0.00591079222136847,0.27335053372889,"MDM2/RNF169/FBXO5/TPT1/HMGA2/ING2/KLHL15/RMI2/TAF9",9
GO:0007568,"GO:0007568","aging","21/612","224/11852",0.00598910844192936,0.00598910844192936,0.27335053372889,"ASS1/GLRX2/EDN1/HMGCR/APAF1/LIMS1/BMPR1A/FBXO5/MAPK14/CACYBP/SERP1/CANX/KRAS/CHEK1/HMGA2/B2M/ING2/PTEN/ERO1A/GCLM/DKK1",21
GO:0090342,"GO:0090342","regulation of cell aging","7/612","43/11852",0.00601716127737789,0.00601716127737789,0.27335053372889,"BMPR1A/FBXO5/KRAS/HMGA2/B2M/ING2/PTEN",7
GO:0045116,"GO:0045116","protein neddylation","4/612","15/11852",0.00608792111639744,0.00608792111639744,0.27335053372889,"RBX1/RPL5/NAE1/DCUN1D5",4
GO:1903749,"GO:1903749","positive regulation of establishment of protein localization to mitochondrion","8/612","54/11852",0.00613610967091002,0.00613610967091002,0.27335053372889,"NPEPPS/UBE2D3/PMAIP1/FZD5/YWHAZ/YWHAG/PPP3R1/YWHAQ",8
GO:0090068,"GO:0090068","positive regulation of cell cycle process","22/612","239/11852",0.00616241889638874,0.00616241889638874,0.27335053372889,"E2F7/EDN1/EREG/MDM2/MDM4/CNOT7/CUL3/RANBP1/EP300/FBXO5/VPS4B/NUSAP1/BRD4/UHRF2/HMGA2/CNOT8/LSM11/RPL26/MTBP/DBF4/GPSM2/ADAM17",22
GO:0072655,"GO:0072655","establishment of protein localization to mitochondrion","14/612","128/11852",0.00626311071439953,0.00626311071439953,0.274861488126895,"NPEPPS/PMPCB/UBE2D3/TIMM10B/PMAIP1/TOMM70/FZD5/GRPEL2/YWHAZ/YWHAG/DNAJC19/PPP3R1/DNAJC15/YWHAQ",14
GO:0097193,"GO:0097193","intrinsic apoptotic signaling pathway","22/612","240/11852",0.00646646327585986,0.00646646327585986,0.277630576052834,"DDIT4/EIF2AK3/PERP/APAF1/UBQLN1/MDM2/BAG5/CUL3/FNIP2/YBX3/EP300/PDCD10/TPT1/PMAIP1/MCL1/PDK1/RPL26/ING2/PTPN2/ERO1A/TAF9/URI1",22
GO:0009266,"GO:0009266","response to temperature stimulus","18/612","183/11852",0.00648702247959412,0.00648702247959412,0.277630576052834,"EIF2AK3/MICB/MICA/GLRX2/NUP133/NUP155/POLR2D/BAG5/YBX3/EP300/DNAJC3/RPA3/BAG2/HSPA13/DNAJB4/HDAC2/ERO1A/NUP54",18
GO:0034067,"GO:0034067","protein localization to Golgi apparatus","5/612","24/11852",0.00677060047086919,0.00677060047086919,0.277630576052834,"RAB6A/GOLPH3/ARL5A/ARL1/PAQR3",5
GO:1900739,"GO:1900739","regulation of protein insertion into mitochondrial membrane involved in apoptotic signaling pathway","5/612","24/11852",0.00677060047086919,0.00677060047086919,0.277630576052834,"PMAIP1/YWHAZ/YWHAG/PPP3R1/YWHAQ",5
GO:1900740,"GO:1900740","positive regulation of protein insertion into mitochondrial membrane involved in apoptotic signaling pathway","5/612","24/11852",0.00677060047086919,0.00677060047086919,0.277630576052834,"PMAIP1/YWHAZ/YWHAG/PPP3R1/YWHAQ",5
GO:0072413,"GO:0072413","signal transduction involved in mitotic cell cycle checkpoint","8/612","55/11852",0.00686460903789732,0.00686460903789732,0.277630576052834,"E2F7/RINT1/MDM2/MDM4/CNOT7/EP300/CNOT8/RPL26",8
GO:1902402,"GO:1902402","signal transduction involved in mitotic DNA damage checkpoint","8/612","55/11852",0.00686460903789732,0.00686460903789732,0.277630576052834,"E2F7/RINT1/MDM2/MDM4/CNOT7/EP300/CNOT8/RPL26",8
GO:1902403,"GO:1902403","signal transduction involved in mitotic DNA integrity checkpoint","8/612","55/11852",0.00686460903789732,0.00686460903789732,0.277630576052834,"E2F7/RINT1/MDM2/MDM4/CNOT7/EP300/CNOT8/RPL26",8
GO:0070482,"GO:0070482","response to oxygen levels","26/612","301/11852",0.00704196238779497,0.00704196238779497,0.282038330074282,"NOP53/BRIP1/DDIT4/EDN1/APAF1/VHL/UBQLN1/MDM2/NPEPPS/CCNA2/MDM4/PSMA4/RBX1/EP300/PSMA3/EEF2K/BIRC2/EGLN1/PMAIP1/ATP1B1/PDK1/PTEN/HDAC2/ERO1A/ADAM17/PSMD12",26
GO:0070585,"GO:0070585","protein localization to mitochondrion","14/612","130/11852",0.00716796308194467,0.00716796308194467,0.28286611598581,"NPEPPS/PMPCB/UBE2D3/TIMM10B/PMAIP1/TOMM70/FZD5/GRPEL2/YWHAZ/YWHAG/DNAJC19/PPP3R1/DNAJC15/YWHAQ",14
GO:0001666,"GO:0001666","response to hypoxia","24/612","272/11852",0.00729962873688548,0.00729962873688548,0.28286611598581,"NOP53/BRIP1/DDIT4/EDN1/APAF1/VHL/UBQLN1/MDM2/NPEPPS/CCNA2/MDM4/PSMA4/RBX1/EP300/PSMA3/BIRC2/EGLN1/PMAIP1/ATP1B1/PDK1/PTEN/ERO1A/ADAM17/PSMD12",24
GO:0016236,"GO:0016236","macroautophagy","24/612","272/11852",0.00729962873688548,0.00729962873688548,0.28286611598581,"ATG5/VMP1/GNAI3/VPS35/UBQLN1/KLHL3/PAFAH1B2/UBXN2A/LAMP2/RIPK2/LAMTOR3/RAB23/VPS4B/STAM/PLAA/NPC1/RAB5A/ATG12/C9orf72/TOMM70/TMEM41B/VDAC1/LAMTOR5/FEZ2",24
GO:0006790,"GO:0006790","sulfur compound metabolic process","25/612","287/11852",0.00733690755038468,0.00733690755038468,0.28286611598581,"HMGCS1/IDH1/GLRX2/HEXB/IMPAD1/UGDH/ESD/PDP1/ADO/GGCT/SLC19A2/ACSL3/GLO1/CHAC2/ENOPH1/HSD17B12/APIP/PDK1/HACD1/B3GNT2/SUCLG2/SP1/GCLM/GLRX3/NFU1",25
GO:0044321,"GO:0044321","response to leptin","4/612","16/11852",0.00779058413533503,0.00779058413533503,0.290240041083103,"EDN1/CCNA2/UGCG/PTEN",4
GO:0051444,"GO:0051444","negative regulation of ubiquitin-protein transferase activity","4/612","16/11852",0.00779058413533503,0.00779058413533503,0.290240041083103,"BAG5/FBXO5/BAG2/RPL5",4
GO:0071786,"GO:0071786","endoplasmic reticulum tubular network organization","4/612","16/11852",0.00779058413533503,0.00779058413533503,0.290240041083103,"ARL6IP1/RTN4/ATL2/TMEM170A",4
GO:0072395,"GO:0072395","signal transduction involved in cell cycle checkpoint","9/612","68/11852",0.00795031089825748,0.00795031089825748,0.290240041083103,"E2F7/RINT1/MDM2/MDM4/CNOT7/EP300/CHEK1/CNOT8/RPL26",9
GO:0072401,"GO:0072401","signal transduction involved in DNA integrity checkpoint","9/612","68/11852",0.00795031089825748,0.00795031089825748,0.290240041083103,"E2F7/RINT1/MDM2/MDM4/CNOT7/EP300/CHEK1/CNOT8/RPL26",9
GO:0072422,"GO:0072422","signal transduction involved in DNA damage checkpoint","9/612","68/11852",0.00795031089825748,0.00795031089825748,0.290240041083103,"E2F7/RINT1/MDM2/MDM4/CNOT7/EP300/CHEK1/CNOT8/RPL26",9
GO:1900101,"GO:1900101","regulation of endoplasmic reticulum unfolded protein response","5/612","25/11852",0.0081109044398579,0.0081109044398579,0.293505397043427,"DNAJB9/FICD/PPP1R15B/AGR2/PTPN2",5
GO:0010569,"GO:0010569","regulation of double-strand break repair via homologous recombination","6/612","35/11852",0.00833764251022914,0.00833764251022914,0.296508357509873,"RAD51AP1/CHEK1/PPP4R2/TERF2IP/KLHL15/RMI2",6
GO:0031343,"GO:0031343","positive regulation of cell killing","6/612","35/11852",0.00833764251022914,0.00833764251022914,0.296508357509873,"MICB/MICA/FAM49B/AP1G1/B2M/CADM1",6
GO:0031497,"GO:0031497","chromatin assembly","10/612","81/11852",0.00860963297404296,0.00860963297404296,0.302887264436461,"CENPL/RBBP4/CENPN/SET/HELLS/ITGB3BP/HMGA2/CENPU/CENPH/GATAD1",10
GO:0007030,"GO:0007030","Golgi organization","13/612","120/11852",0.00893433452974533,0.00893433452974533,0.302887264436461,"VMP1/BAG5/UBXN2A/PI4K2B/ATP8B1/TMED2/RAB2A/GOLPH3/PDCD10/ATL2/YWHAZ/TMED5/ARL1",13
GO:0006575,"GO:0006575","cellular modified amino acid metabolic process","15/612","147/11852",0.00893918107387892,0.00893918107387892,0.302887264436461,"ASS1/IDH1/GLRX2/P4HA1/SLC25A32/GGCT/SERINC1/GLO1/GCH1/EGLN1/CHAC2/ENOPH1/APIP/ERO1A/GCLM",15
GO:0007033,"GO:0007033","vacuole organization","15/612","147/11852",0.00893918107387892,0.00893918107387892,0.302887264436461,"HEXB/ATG5/VMP1/VPS35/UBQLN1/UBXN2A/TMEM106B/RAB23/VPS4B/TMEM165/RAB5A/ATG12/C9orf72/TMEM41B/FEZ2",15
GO:0043666,"GO:0043666","regulation of phosphoprotein phosphatase activity","11/612","94/11852",0.0089399944356567,0.0089399944356567,0.302887264436461,"PPP2R5C/PPP2R1B/PPP1R15B/PPP6R3/SET/MASTL/ARPP19/LGALS3/PPP2R5E/PPP4R2/URI1",11
GO:0002697,"GO:0002697","regulation of immune effector process","22/612","247/11852",0.00895754885128497,0.00895754885128497,0.302887264436461,"RC3H2/NOP53/PPM1B/IFIT1/MICB/MICA/ATG5/RIOK3/FAM49B/AP1G1/RIPK2/BIRC2/MAPK14/SNX4/BST2/LGALS3/RSAD2/HERC5/FZD5/B2M/CADM1/CD47",22
GO:0001909,"GO:0001909","leukocyte mediated cytotoxicity","8/612","58/11852",0.00944430074286739,0.00944430074286739,0.316749804118933,"MICB/MICA/FAM49B/AP1G1/CTSH/CEBPG/B2M/CADM1",8
GO:0007029,"GO:0007029","endoplasmic reticulum organization","7/612","47/11852",0.00983541573139024,0.00983541573139024,0.327207081929698,"EIF2AK3/ARL6IP1/RTN4/ATL2/SEC31A/TMEM170A/TMEM38B",7
GO:0043462,"GO:0043462","regulation of ATPase activity","8/612","59/11852",0.0104465898770269,0.0104465898770269,0.34442026303819,"THADA/ATP1B1/TOR1AIP1/VMA21/DNAJB4/TMEM64/DNAJC19/DNAJC15",8
GO:2000058,"GO:2000058","regulation of ubiquitin-dependent protein catabolic process","14/612","136/11852",0.0105198023693982,0.0105198023693982,0.34442026303819,"RNF19A/NOP53/UBE3A/UBQLN1/MDM2/OGT/BAG5/RBX1/USP14/RPL5/FBXO22/RNF139/PTEN/TAF9",14
GO:0071824,"GO:0071824","protein-DNA complex subunit organization","18/612","193/11852",0.0110080031909144,0.0110080031909144,0.352800690376119,"CENPL/RBBP4/CENPN/ACTR6/RBX1/RPA3/GTF2H3/GMNN/DR1/SET/HELLS/MED6/CCNH/ITGB3BP/CENPU/CENPH/MIS12/MNAT1",18
GO:0000045,"GO:0000045","autophagosome assembly","10/612","84/11852",0.0110323359544765,0.0110323359544765,0.352800690376119,"ATG5/VMP1/UBQLN1/UBXN2A/RAB23/RAB5A/ATG12/C9orf72/TMEM41B/FEZ2",10
GO:0019218,"GO:0019218","regulation of steroid metabolic process","10/612","84/11852",0.0110323359544765,0.0110323359544765,0.352800690376119,"FDFT1/HMGCS1/STARD4/HMGCR/SQLE/ASAH1/SC5D/NFYB/INSIG2/SP1",10
GO:0006302,"GO:0006302","double-strand break repair","19/612","208/11852",0.0112934115467751,0.0112934115467751,0.358371496775801,"BRIP1/MMS22L/MCM9/WDR48/RNF169/YY1/RPA3/RAD51AP1/RNF138/MDC1/DNA2/BARD1/CHEK1/HMGA2/PPP4R2/TERF2IP/KLHL15/RMI2/UBE2V2",19
GO:0071158,"GO:0071158","positive regulation of cell cycle arrest","9/612","72/11852",0.0114532181801962,0.0114532181801962,0.36066823662667,"E2F7/MDM2/MDM4/CNOT7/EP300/UHRF2/HMGA2/CNOT8/RPL26",9
GO:0035966,"GO:0035966","response to topologically incorrect protein","17/612","180/11852",0.0117904832375096,0.0117904832375096,0.361090852274933,"DNAJB9/EIF2AK3/FICD/UGGT1/PPP1R15B/CUL3/EP300/DNAJC3/AGR2/SERP1/CANX/SEC31A/HSPA13/DNAJB4/KLHL15/PTPN2/ERO1A",17
GO:0043543,"GO:0043543","protein acylation","19/612","209/11852",0.0118459024978508,0.0118459024978508,0.361090852274933,"PPM1B/ATG5/KANSL1/KANSL1L/OGT/NMT2/MSL2/EP300/DR1/SET/NAA50/DSCC1/NAA30/CHEK1/TERF2IP/ZDHHC20/MSL1/HDAC2/TAF9",19
[truncated: 4,152 more rows]

## Sheet: GSEA_sharedUP
,"ID","Description","GeneRatio","BgRatio","pvalue","p.adjust","qvalue","geneID","Count"
[truncated: 1,934 more rows]

## Sheet: GSEA_BspecDOWN
,"ID","Description","GeneRatio","BgRatio","pvalue","p.adjust","qvalue","geneID","Count"
[truncated: 4,104 more rows]

[truncated: 2 more sheets: GSEA_HspecDOWN, GSEA_sharedDOWN]
