# Supplementary material for: Decoding mechanism of action and sensitivity to drug candidates from integrated transcriptome and chromatin state
Source: eLife. 2022 Aug 31;11:e78012. doi: 10.7554/eLife.78012 (PMC9433094; doi:10.7554/eLife.78012)
Supplement: Supplementary file 2. [file elife-78012-supp2.xlsx]

## Sheet: GO_HM_clust_B6_1
,"ID","Description","GeneRatio","BgRatio","pvalue","p.adjust","qvalue","geneID","Count"
GO:0000226,"GO:0000226","microtubule cytoskeleton organization","37/473","469/11852",5.78649431898137e-05,5.78649431898137e-05,0.225673278440273,"NCOR1/TACC1/HDAC6/GOLGA2/TUBGCP5/C2CD3/CEP68/PHLDB2/GPSM2/KATNAL1/ASPM/TPPP/SPAG5/TPX2/CDC14B/PDCD6IP/HOOK3/GAS8/NUF2/PTK2/CENPW/NEK2/SKA2/BORA/BBS2/TTK/DIXDC1/SKA1/SPC25/NDC80/ATXN3/CEP57/VAMP4/CETN3/GNAI1/CDKN1B/CHMP1B",37
GO:0007051,"GO:0007051","spindle organization","17/473","161/11852",0.000236718918706681,0.000236718918706681,0.461601891478027,"NCOR1/TACC1/GOLGA2/TUBGCP5/GPSM2/ASPM/SPAG5/TPX2/NUF2/CENPW/NEK2/BORA/TTK/SPC25/NDC80/GNAI1/CHMP1B",17
GO:0044003,"GO:0044003","modification by symbiont of host morphology or physiology","7/473","35/11852",0.000392317966008482,0.000392317966008482,0.510013355811026,"SERPINB9/EIF2AK4/CASP8/EIF2AK2/KPNA2/RRAGA/VAPA",7
GO:0006906,"GO:0006906","vesicle fusion","10/473","76/11852",0.000836455792146589,0.000836455792146589,0.550863678435329,"TAP1/STXBP6/VAV3/VPS39/STXBP1/STX2/STX7/SAMD9L/SNAP23/VAMP4",10
GO:0016050,"GO:0016050","vesicle organization","23/473","280/11852",0.000843037258826242,0.000843037258826242,0.550863678435329,"MYO18A/GOLGA2/TAP1/STXBP6/VAV3/TSG101/F2R/AKTIP/VPS39/TRAPPC6B/GOLPH3L/STXBP1/PDCD6IP/HOOK3/STX2/STX7/CLCN3/SAMD9L/SNAP23/VAPA/SNX10/VAMP4/CHMP1B",23
GO:0007052,"GO:0007052","mitotic spindle organization","12/473","105/11852",0.000952368699158735,0.000952368699158735,0.550863678435329,"TACC1/GOLGA2/GPSM2/TPX2/NUF2/NEK2/BORA/TTK/SPC25/NDC80/GNAI1/CHMP1B",12
GO:0051383,"GO:0051383","kinetochore organization","5/473","21/11852",0.00118604865033144,0.00118604865033144,0.550863678435329,"SMC4/NUF2/CENPW/CENPK/NDC80",5
GO:0019048,"GO:0019048","modulation by virus of host morphology or physiology","6/473","31/11852",0.00123063034223891,0.00123063034223891,0.550863678435329,"EIF2AK4/CASP8/EIF2AK2/KPNA2/RRAGA/VAPA",6
GO:0090174,"GO:0090174","organelle membrane fusion","10/473","82/11852",0.00151552311955111,0.00151552311955111,0.550863678435329,"TAP1/STXBP6/VAV3/VPS39/STXBP1/STX2/STX7/SAMD9L/SNAP23/VAMP4",10
GO:0051347,"GO:0051347","positive regulation of transferase activity","34/473","500/11852",0.00167642659121969,0.00167642659121969,0.550863678435329,"MADD/ILK/GOLGA2/MAP3K3/GPRC5C/ADCY7/CDC25B/NEK1/VAV3/F2R/PIK3CG/PDE5A/IQGAP3/FYN/TPX2/MAP3K13/DLG3/TNIK/CDC14B/EIF2AK2/SORL1/TGFBR2/PTK2/NEK2/PRKAR1A/BORA/RALB/CALM2/BMI1/MDFIC/EPM2AIP1/CALM1/IL18/CDKN1B",34
GO:0061025,"GO:0061025","membrane fusion","12/473","112/11852",0.00167688024931278,0.00167688024931278,0.550863678435329,"TAP1/STXBP6/VAV3/VPS39/STXBP1/STX2/HACE1/STX7/SAMD9L/SNAP23/VAPA/VAMP4",12
GO:0051817,"GO:0051817","modification of morphology or physiology of other organism involved in symbiotic interaction","10/473","84/11852",0.00182232946846674,0.00182232946846674,0.550863678435329,"SERPINB9/EIF2AK4/CASP8/EIF2AK2/KPNA2/RRAGA/CALM2/VAPA/SUGT1/CALM1",10
GO:0044068,"GO:0044068","modulation by symbiont of host cellular process","5/473","23/11852",0.0018362122614511,0.0018362122614511,0.550863678435329,"SERPINB9/EIF2AK4/CASP8/KPNA2/VAPA",5
GO:0007259,"GO:0007259","JAK-STAT cascade","10/473","87/11852",0.00237485220078159,0.00237485220078159,0.661565970217727,"STAMBP/SOCS6/F2R/ARL2BP/FYN/STAT2/STAT1/IFNAR1/CYP1B1/IL18",10
GO:0048284,"GO:0048284","organelle fusion","11/473","103/11852",0.00264815129480394,0.00264815129480394,0.688519336649025,"TAP1/STXBP6/VAV3/VPS39/STXBP1/STX2/STX7/SAMD9L/SNAP23/OMA1/VAMP4",11
GO:0097696,"GO:0097696","STAT cascade","10/473","90/11852",0.00305446647427536,0.00305446647427536,0.698206270492588,"STAMBP/SOCS6/F2R/ARL2BP/FYN/STAT2/STAT1/IFNAR1/CYP1B1/IL18",10
GO:0046777,"GO:0046777","protein autophosphorylation","16/473","189/11852",0.00371609703819971,0.00371609703819971,0.698206270492588,"CDKL5/MAP3K3/EIF2AK4/AAK1/FYN/MAP3K13/TNIK/EIF2AK2/PTK2/NEK2/PPP2R5A/TTK/CALM2/MELK/CALM1/PPP2R5C",16
GO:0007265,"GO:0007265","Ras protein signal transduction","26/473","371/11852",0.00383754578770777,0.00383754578770777,0.698206270492588,"MADD/KANK2/CADM4/STAMBP/RALGPS2/GPSM2/VAV3/SOS2/F2R/IQGAP3/ARHGEF37/ARHGEF40/RAB6A/NRP1/RHOBTB1/MCF2L/HACE1/RAB6B/FBXO8/RIT1/RAP1B/RALB/RHOBTB3/RAB10/RHOU/ARF6",26
GO:0042073,"GO:0042073","intraciliary transport","7/473","51/11852",0.00390036256607443,0.00390036256607443,0.698206270492588,"IFT43/IFT80/DYNC2LI1/KIF3C/TTC30A/KIFAP3/TCTEX1D2",7
GO:0003171,"GO:0003171","atrioventricular valve development","4/473","17/11852",0.00393859947457357,0.00393859947457357,0.698206270492588,"SMAD4/TGFBR2/MDM2/SOX4",4
GO:0003181,"GO:0003181","atrioventricular valve morphogenesis","4/473","17/11852",0.00393859947457357,0.00393859947457357,0.698206270492588,"SMAD4/TGFBR2/MDM2/SOX4",4
GO:0045947,"GO:0045947","negative regulation of translational initiation","4/473","17/11852",0.00393859947457357,0.00393859947457357,0.698206270492588,"EIF2AK4/PAIP2B/PAIP2/C8orf88",4
GO:0032886,"GO:0032886","regulation of microtubule-based process","16/473","191/11852",0.00411899311319728,0.00411899311319728,0.698437962672583,"HDAC6/PHLDB2/GPSM2/SPAG5/TPX2/PDCD6IP/NEK2/SKA2/BORA/BBS2/DIXDC1/SKA1/TCTEX1D2/GNAI1/CDKN1B/CHMP1B",16
GO:0035821,"GO:0035821","modification of morphology or physiology of other organism","10/473","95/11852",0.00452353847876587,0.00452353847876587,0.735075002799454,"SERPINB9/EIF2AK4/CASP8/EIF2AK2/KPNA2/RRAGA/CALM2/VAPA/SUGT1/CALM1",10
GO:0090224,"GO:0090224","regulation of spindle organization","6/473","40/11852",0.00473983341193388,0.00473983341193388,0.735955791565008,"GPSM2/SPAG5/TPX2/BORA/GNAI1/CHMP1B",6
GO:0002230,"GO:0002230","positive regulation of defense response to virus by host","4/473","18/11852",0.00490637194376672,0.00490637194376672,0.735955791565008,"EIF2AK4/MAVS/STAT1/TRIM6",4
GO:0045860,"GO:0045860","positive regulation of protein kinase activity","27/473","400/11852",0.00537517138606393,0.00537517138606393,0.753595631188506,"MADD/ILK/MAP3K3/GPRC5C/ADCY7/CDC25B/NEK1/F2R/PIK3CG/PDE5A/IQGAP3/FYN/TPX2/MAP3K13/DLG3/TNIK/EIF2AK2/TGFBR2/PTK2/PRKAR1A/BORA/RALB/CALM2/MDFIC/CALM1/IL18/CDKN1B",27
GO:1902850,"GO:1902850","microtubule cytoskeleton organization involved in mitosis","12/473","129/11852",0.00541043017263543,0.00541043017263543,0.753595631188506,"TACC1/GOLGA2/GPSM2/TPX2/NUF2/NEK2/BORA/TTK/SPC25/NDC80/GNAI1/CHMP1B",12
GO:0019054,"GO:0019054","modulation by virus of host process","4/473","19/11852",0.00602167369590934,0.00602167369590934,0.798786666167398,"EIF2AK4/CASP8/KPNA2/VAPA",4
GO:0071391,"GO:0071391","cellular response to estrogen stimulus","3/473","10/11852",0.00614451281667229,0.00614451281667229,0.798786666167398,"SERPINB9/MDM2/SFR1",3
GO:0051225,"GO:0051225","spindle assembly","10/473","101/11852",0.0069645767473846,0.0069645767473846,0.857890382112408,"NCOR1/GOLGA2/TUBGCP5/GPSM2/ASPM/SPAG5/TPX2/CENPW/NEK2/CHMP1B",10
GO:2000241,"GO:2000241","regulation of reproductive process","9/473","86/11852",0.00718222125060944,0.00718222125060944,0.857890382112408,"CDC25B/CDC25C/ASPM/PDE5A/STXBP1/PRKAR1A/TTK/CDKN1B/SEMA3A",9
GO:0070507,"GO:0070507","regulation of microtubule cytoskeleton organization","14/473","168/11852",0.00736272061526214,0.00736272061526214,0.857890382112408,"HDAC6/PHLDB2/GPSM2/SPAG5/TPX2/PDCD6IP/NEK2/SKA2/BORA/DIXDC1/SKA1/GNAI1/CDKN1B/CHMP1B",14
GO:0033674,"GO:0033674","positive regulation of kinase activity","28/473","430/11852",0.0074790443568774,0.0074790443568774,0.857890382112408,"MADD/ILK/MAP3K3/GPRC5C/ADCY7/CDC25B/NEK1/VAV3/F2R/PIK3CG/PDE5A/IQGAP3/FYN/TPX2/MAP3K13/DLG3/TNIK/EIF2AK2/TGFBR2/PTK2/PRKAR1A/BORA/RALB/CALM2/MDFIC/CALM1/IL18/CDKN1B",28
GO:0006085,"GO:0006085","acetyl-CoA biosynthetic process","4/473","21/11852",0.00873067240525939,0.00873067240525939,0.927453163534563,"ACSS2/PDK4/PDP1/PPCS",4
GO:0051445,"GO:0051445","regulation of meiotic cell cycle","5/473","33/11852",0.00933676715210619,0.00933676715210619,0.927453163534563,"CDC25B/CDC25C/ASPM/PRKAR1A/TTK",5
GO:0070296,"GO:0070296","sarcoplasmic reticulum calcium ion transport","4/473","22/11852",0.0103407929943613,0.0103407929943613,0.927453163534563,"TMEM38B/CALM2/CALM1/ZMPSTE24",4
GO:0035721,"GO:0035721","intraciliary retrograde transport","3/473","12/11852",0.0106145358312474,0.0106145358312474,0.927453163534563,"IFT43/DYNC2LI1/TCTEX1D2",3
GO:0072697,"GO:0072697","protein localization to cell cortex","3/473","12/11852",0.0106145358312474,0.0106145358312474,0.927453163534563,"EPB41/GPSM2/GNAI1",3
GO:0090161,"GO:0090161","Golgi ribbon formation","3/473","12/11852",0.0106145358312474,0.0106145358312474,0.927453163534563,"MYO18A/GOLGA2/VAMP4",3
GO:0045773,"GO:0045773","positive regulation of axon extension","5/473","35/11852",0.0119671907615376,0.0119671907615376,0.927453163534563,"ILK/CDKL5/RUFY3/MAP3K13/NRP1",5
GO:0036010,"GO:0036010","protein localization to endosome","4/473","23/11852",0.012131231043395,0.012131231043395,0.927453163534563,"ABHD17C/SORL1/NRP1/ARF6",4
GO:0044782,"GO:0044782","cilium organization","21/473","309/11852",0.0122920657512621,0.0122920657512621,0.927453163534563,"HDAC6/C2CD3/CDKL5/IFT43/NEK1/IFT80/DYNC2LI1/KIF3C/TTC30A/FAM92A/CDC14B/GAS8/ODF2L/NEK2/BBS2/BBS10/SNX10/KIFAP3/TCTEX1D2/BBS9/CEP57",21
GO:0016197,"GO:0016197","endosomal transport","15/473","197/11852",0.012497495965412,0.012497495965412,0.927453163534563,"ERC1/TSG101/VPS39/RAB6A/TBC1D5/SORL1/RAB6B/SNX18/ARL4C/RHOBTB3/TMEM50B/RAB10/VAMP4/ARF6/CHMP1B",15
GO:0010881,"GO:0010881","regulation of cardiac muscle contraction by regulation of the release of sequestered calcium ion","3/473","13/11852",0.0133959060979711,0.0133959060979711,0.927453163534563,"TMEM38B/CALM2/CALM1",3
GO:1990000,"GO:1990000","amyloid fibril formation","3/473","13/11852",0.0133959060979711,0.0133959060979711,0.927453163534563,"FKBP1A/LDLR/MDM2",3
GO:0060236,"GO:0060236","regulation of mitotic spindle organization","5/473","36/11852",0.0134536989686857,0.0134536989686857,0.927453163534563,"GPSM2/TPX2/BORA/GNAI1/CHMP1B",5
GO:0097352,"GO:0097352","autophagosome maturation","5/473","36/11852",0.0134536989686857,0.0134536989686857,0.927453163534563,"TSG101/GABARAPL1/LIX1L/SNX14/GABARAPL2",5
GO:0072698,"GO:0072698","protein localization to microtubule cytoskeleton","6/473","50/11852",0.0140569246546369,0.0140569246546369,0.927453163534563,"C2CD3/ABHD17C/SPAG5/HOOK3/TTK/SNX10",6
GO:0007163,"GO:0007163","establishment or maintenance of cell polarity","14/473","182/11852",0.0142875855236803,0.0142875855236803,0.927453163534563,"MYO18A/FRMD4B/ILK/GPSM2/RUFY3/DLG3/PDCD6IP/PTK2/RAP1B/RHOBTB3/RAB10/NDC80/RHOU/ARF6",14
GO:1903046,"GO:1903046","meiotic cell cycle process","11/473","130/11852",0.0148484856286396,0.0148484856286396,0.927453163534563,"GOLGA2/CDC25B/AGO4/CDC25C/ASPM/SMC4/NUF2/MLH3/PRKAR1A/TTK/BUB1",11
GO:0051493,"GO:0051493","regulation of cytoskeleton organization","27/473","434/11852",0.0149257979781252,0.0149257979781252,0.927453163534563,"HDAC6/ILK/SMAD4/PHLDB2/GPSM2/SPAG5/TPX2/PDCD6IP/CARMIL1/CIT/NRP1/PTK2/RHOBTB1/GMFB/NEK2/MTPN/SKA2/BORA/RHOBTB3/DIXDC1/SKA1/RHOU/GNAI1/ARF6/CDKN1B/CHMP1B/KATNBL1",27
GO:0006692,"GO:0006692","prostanoid metabolic process","4/473","25/11852",0.0162788407819719,0.0162788407819719,0.927453163534563,"ACOX1/ZADH2/CBR1/PNPLA8",4
GO:0006693,"GO:0006693","prostaglandin metabolic process","4/473","25/11852",0.0162788407819719,0.0162788407819719,0.927453163534563,"ACOX1/ZADH2/CBR1/PNPLA8",4
GO:0007143,"GO:0007143","female meiotic nuclear division","4/473","25/11852",0.0162788407819719,0.0162788407819719,0.927453163534563,"CDC25B/MLH3/PRKAR1A/TTK",4
GO:0031629,"GO:0031629","synaptic vesicle fusion to presynaptic active zone membrane","3/473","14/11852",0.0165524855181537,0.0165524855181537,0.927453163534563,"STXBP1/STX2/SNAP23",3
GO:0042159,"GO:0042159","lipoprotein catabolic process","3/473","14/11852",0.0165524855181537,0.0165524855181537,0.927453163534563,"ABHD17C/LDLR/LYPLAL1",3
GO:0099500,"GO:0099500","vesicle fusion to plasma membrane","3/473","14/11852",0.0165524855181537,0.0165524855181537,0.927453163534563,"STXBP1/STX2/SNAP23",3
GO:0140013,"GO:0140013","meiotic nuclear division","10/473","115/11852",0.0165528621990105,0.0165528621990105,0.927453163534563,"GOLGA2/CDC25B/AGO4/ASPM/SMC4/NUF2/MLH3/PRKAR1A/TTK/BUB1",10
GO:0060271,"GO:0060271","cilium assembly","20/473","299/11852",0.0167737996621462,0.0167737996621462,0.927453163534563,"HDAC6/C2CD3/CDKL5/IFT43/NEK1/IFT80/DYNC2LI1/KIF3C/FAM92A/CDC14B/GAS8/ODF2L/NEK2/BBS2/BBS10/SNX10/KIFAP3/TCTEX1D2/BBS9/CEP57",20
GO:0006336,"GO:0006336","DNA replication-independent nucleosome assembly","5/473","38/11852",0.0167892177320445,0.0167892177320445,0.927453163534563,"HJURP/CENPW/ASF1A/CENPK/CENPI",5
GO:0048278,"GO:0048278","vesicle docking","6/473","52/11852",0.0168531227940301,0.0168531227940301,0.927453163534563,"STXBP1/EXOC6B/STX2/STX7/RALB/RAB10",6
GO:0043123,"GO:0043123","positive regulation of I-kappaB kinase/NF-kappaB signaling","12/473","150/11852",0.016922798916048,0.016922798916048,0.927453163534563,"FKBP1A/MAP3K3/MIB2/TRIM5/F2R/IRAK4/FYN/CASP8/MAVS/EDAR/NDFIP1/VAPA",12
GO:0014066,"GO:0014066","regulation of phosphatidylinositol 3-kinase signaling","8/473","83/11852",0.0174742833364273,0.0174742833364273,0.927453163534563,"STAMBP/F2R/PIK3CG/FYN/CEP55/PTK2/PPP2R5C/IL18",8
GO:0060993,"GO:0060993","kidney morphogenesis","7/473","68/11852",0.0183461236905769,0.0183461236905769,0.927453163534563,"ILK/PBX1/SMAD4/STAT1/LGR4/SOX4/ZMPSTE24",7
GO:0034724,"GO:0034724","DNA replication-independent nucleosome organization","5/473","39/11852",0.0186455438878319,0.0186455438878319,0.927453163534563,"HJURP/CENPW/ASF1A/CENPK/CENPI",5
GO:0035735,"GO:0035735","intraciliary transport involved in cilium assembly","5/473","39/11852",0.0186455438878319,0.0186455438878319,0.927453163534563,"IFT43/IFT80/DYNC2LI1/KIF3C/KIFAP3",5
GO:0046503,"GO:0046503","glycerolipid catabolic process","5/473","39/11852",0.0186455438878319,0.0186455438878319,0.927453163534563,"PIK3CG/SORL1/LDLR/ABHD2/PNPLA8",5
GO:0010971,"GO:0010971","positive regulation of G2/M transition of mitotic cell cycle","4/473","26/11852",0.018647228305399,0.018647228305399,0.927453163534563,"PBX1/CDC25B/CDC25C/MTA3",4
GO:0050691,"GO:0050691","regulation of defense response to virus by host","4/473","26/11852",0.018647228305399,0.018647228305399,0.927453163534563,"EIF2AK4/MAVS/STAT1/TRIM6",4
GO:0044380,"GO:0044380","protein localization to cytoskeleton","6/473","54/11852",0.0200102758703162,0.0200102758703162,0.927453163534563,"C2CD3/ABHD17C/SPAG5/HOOK3/TTK/SNX10",6
GO:0035493,"GO:0035493","SNARE complex assembly","3/473","15/11852",0.020088949503349,0.020088949503349,0.927453163534563,"STXBP6/STXBP1/VAMP4",3
GO:2000269,"GO:2000269","regulation of fibroblast apoptotic process","3/473","15/11852",0.020088949503349,0.020088949503349,0.927453163534563,"PIK3CG/STK17A/IER3IP1",3
GO:0048285,"GO:0048285","organelle fission","23/473","365/11852",0.0205914703161841,0.0205914703161841,0.927453163534563,"GOLGA2/MTFR1L/CDC25B/AGO4/CDC25C/ASPM/SMC4/SPAG5/TPX2/CDC14B/STAT2/NUF2/MLH3/NEK2/PRKAR1A/NCAPG/BORA/TTK/BUB1/CENPK/NDC80/CDKN1B/CHMP1B",23
GO:0031669,"GO:0031669","cellular response to nutrient levels","14/473","191/11852",0.0208756360837925,0.0208756360837925,0.927453163534563,"KANK2/EIF2AK4/WIPI1/GABARAPL1/SLC38A2/PDK4/FYN/DSC2/EIF2AK2/RRAGA/AQP3/MDM2/RALB/GABARAPL2",14
GO:0019369,"GO:0019369","arachidonic acid metabolic process","4/473","27/11852",0.0212183582574302,0.0212183582574302,0.927453163534563,"FAAH2/CBR1/CYP1B1/PNPLA8",4
GO:0007018,"GO:0007018","microtubule-based movement","16/473","230/11852",0.0220467760831015,0.0220467760831015,0.927453163534563,"HDAC6/IFT43/KIF13B/IFT80/DYNC2LI1/RAB6A/PURA/KIF3C/TTC30A/GAS8/ACTR10/BBS2/SPA17/KIFAP3/TCTEX1D2/DNAH14",16
GO:0031668,"GO:0031668","cellular response to extracellular stimulus","15/473","212/11852",0.0228313062977885,0.0228313062977885,0.927453163534563,"KANK2/EIF2AK4/WIPI1/GABARAPL1/SLC38A2/PDK4/FYN/DSC2/EIF2AK2/RRAGA/AQP3/MDM2/RALB/GABARAPL2/GLRX2",15
GO:0048193,"GO:0048193","Golgi vesicle transport","21/473","329/11852",0.0231120533076072,0.0231120533076072,0.927453163534563,"MYO18A/GOLGA2/STXBP6/TRAPPC11/WIPI1/TRAPPC6B/RAB6A/GOLPH3L/KIF3C/SORL1/EXOC6B/RAB6B/ACTR10/SNAP23/BBS2/TMED7/VAPA/RAB10/KIFAP3/GABARAPL2/IER3IP1",21
GO:0000910,"GO:0000910","cytokinesis","11/473","139/11852",0.0232708918361852,0.0232708918361852,0.927453163534563,"CDC25B/STAMBP/CEP55/CDC14B/PDCD6IP/CIT/ZFYVE19/SNX18/CALM2/CALM1/CHMP1B",11
GO:0055117,"GO:0055117","regulation of cardiac muscle contraction","6/473","56/11852",0.0235470173460177,0.0235470173460177,0.927453163534563,"PIK3CG/PDE5A/DSC2/TMEM38B/CALM2/CALM1",6
GO:1904292,"GO:1904292","regulation of ERAD pathway","4/473","28/11852",0.0239961570483118,0.0239961570483118,0.927453163534563,"USP19/ERLEC1/RNFT1/ATXN3",4
GO:0008356,"GO:0008356","asymmetric cell division","3/473","16/11852",0.0240074631066901,0.0240074631066901,0.927453163534563,"GOLGA2/ASPM/RAB10",3
GO:0046578,"GO:0046578","regulation of Ras protein signal transduction","14/473","195/11852",0.0244468963126912,0.0244468963126912,0.927453163534563,"MADD/KANK2/CADM4/STAMBP/RALGPS2/VAV3/SOS2/F2R/ARHGEF37/ARHGEF40/NRP1/MCF2L/FBXO8/ARF6",14
GO:0051321,"GO:0051321","meiotic cell cycle","13/473","177/11852",0.0250505594792936,0.0250505594792936,0.927453163534563,"GOLGA2/TUBGCP5/CDC25B/AGO4/CDC25C/ASPM/SMC4/NUF2/MLH3/NEK2/PRKAR1A/TTK/BUB1",13
GO:0000280,"GO:0000280","nuclear division","21/473","333/11852",0.0259633014598606,0.0259633014598606,0.927453163534563,"GOLGA2/CDC25B/AGO4/CDC25C/ASPM/SMC4/SPAG5/TPX2/CDC14B/NUF2/MLH3/NEK2/PRKAR1A/NCAPG/BORA/TTK/BUB1/CENPK/NDC80/CDKN1B/CHMP1B",21
GO:1902751,"GO:1902751","positive regulation of cell cycle G2/M phase transition","4/473","29/11852",0.0269838882647289,0.0269838882647289,0.927453163534563,"PBX1/CDC25B/CDC25C/MTA3",4
GO:0045071,"GO:0045071","negative regulation of viral genome replication","5/473","43/11852",0.027402322998472,0.027402322998472,0.927453163534563,"EIF2AK4/MAVS/EIF2AK2/TRIM6/VAPA",5
GO:0045132,"GO:0045132","meiotic chromosome segregation","6/473","58/11852",0.0274802228399852,0.0274802228399852,0.927453163534563,"AGO4/SMC4/NUF2/MLH3/TTK/BUB1",6
GO:0007032,"GO:0007032","endosome organization","7/473","74/11852",0.027834249979323,0.027834249979323,0.927453163534563,"TSG101/AKTIP/PDCD6IP/HOOK3/CLCN3/SNX10/CHMP1B",7
GO:0048525,"GO:0048525","negative regulation of viral process","7/473","74/11852",0.027834249979323,0.027834249979323,0.927453163534563,"EIF2AK4/TRIM5/MAVS/EIF2AK2/STAT1/TRIM6/VAPA",7
GO:0031667,"GO:0031667","response to nutrient levels","22/473","356/11852",0.028109334846227,0.028109334846227,0.927453163534563,"KANK2/EIF2AK4/WIPI1/GABARAPL1/SLC38A2/PDK4/FYN/DSC2/MBD2/TBC1D5/EIF2AK2/SORL1/LDLR/TGFBR2/RRAGA/AQP3/MDM2/STAT1/RALB/BBS2/OMA1/GABARAPL2",22
GO:0006914,"GO:0006914","autophagy","26/473","438/11852",0.028124439758558,0.028124439758558,0.927453163534563,"HDAC6/GOLGA2/EIF2AK4/WIPI1/TRIM5/TSG101/GABARAPL1/NBR1/VPS39/TBC1D5/LIX1L/RETREG1/PTK2/RRAGA/XPA/PAFAH1B2/TMEM59/ATP6V1A/SNX14/RALB/VMP1/GABARAPL2/ATG4C/DRAM2/SCOC/ZMPSTE24",26
GO:0061919,"GO:0061919","process utilizing autophagic mechanism","26/473","438/11852",0.028124439758558,0.028124439758558,0.927453163534563,"HDAC6/GOLGA2/EIF2AK4/WIPI1/TRIM5/TSG101/GABARAPL1/NBR1/VPS39/TBC1D5/LIX1L/RETREG1/PTK2/RRAGA/XPA/PAFAH1B2/TMEM59/ATP6V1A/SNX14/RALB/VMP1/GABARAPL2/ATG4C/DRAM2/SCOC/ZMPSTE24",26
GO:0010801,"GO:0010801","negative regulation of peptidyl-threonine phosphorylation","3/473","17/11852",0.0283079338850008,0.0283079338850008,0.927453163534563,"CADM4/CALM2/CALM1",3
GO:0061952,"GO:0061952","midbody abscission","3/473","17/11852",0.0283079338850008,0.0283079338850008,0.927453163534563,"CEP55/PDCD6IP/CHMP1B",3
GO:0006690,"GO:0006690","icosanoid metabolic process","6/473","59/11852",0.0296002551802389,0.0296002551802389,0.927453163534563,"ACOX1/ZADH2/FAAH2/CBR1/CYP1B1/PNPLA8",6
GO:1901983,"GO:1901983","regulation of protein acetylation","6/473","59/11852",0.0296002551802389,0.0296002551802389,0.927453163534563,"SMAD4/SDR16C5/SOX4/ARNTL/EID1/ZMPSTE24",6
GO:0009991,"GO:0009991","response to extracellular stimulus","23/473","379/11852",0.0301545424180609,0.0301545424180609,0.927453163534563,"KANK2/EIF2AK4/WIPI1/GABARAPL1/SLC38A2/PDK4/FYN/DSC2/MBD2/TBC1D5/EIF2AK2/SORL1/LDLR/TGFBR2/RRAGA/AQP3/MDM2/STAT1/RALB/BBS2/OMA1/GABARAPL2/GLRX2",23
GO:0034080,"GO:0034080","CENP-A containing nucleosome assembly","4/473","30/11852",0.030184163825093,0.030184163825093,0.927453163534563,"HJURP/CENPW/CENPK/CENPI",4
GO:0061641,"GO:0061641","CENP-A containing chromatin organization","4/473","30/11852",0.030184163825093,0.030184163825093,0.927453163534563,"HJURP/CENPW/CENPK/CENPI",4
GO:1903008,"GO:1903008","organelle disassembly","8/473","92/11852",0.0303442152916752,0.0303442152916752,0.927453163534563,"HDAC6/GOLGA2/WIPI1/GABARAPL1/MTIF3/MCTS1/RETREG1/GABARAPL2",8
GO:0009267,"GO:0009267","cellular response to starvation","10/473","127/11852",0.0305942930344487,0.0305942930344487,0.927453163534563,"EIF2AK4/WIPI1/GABARAPL1/SLC38A2/PDK4/DSC2/EIF2AK2/RRAGA/RALB/GABARAPL2",10
GO:0010522,"GO:0010522","regulation of calcium ion transport into cytosol","6/473","60/11852",0.0318248606286328,0.0318248606286328,0.927453163534563,"FKBP1A/F2R/FYN/TMEM38B/CALM2/CALM1",6
GO:0140029,"GO:0140029","exocytic process","6/473","60/11852",0.0318248606286328,0.0318248606286328,0.927453163534563,"STXBP1/EXOC6B/STX2/SNAP23/RALB/RAB10",6
GO:0030031,"GO:0030031","cell projection assembly","27/473","464/11852",0.0318266919567985,0.0318266919567985,0.927453163534563,"HDAC6/C2CD3/CDKL5/IFT43/ZMYND8/NEK1/IFT80/VAV3/DYNC2LI1/KIF3C/FAM92A/TNIK/CDC14B/GAS8/CARMIL1/NRP1/ODF2L/NEK2/BBS2/BBS10/SNX10/KIFAP3/TCTEX1D2/BBS9/CEP57/RHOU/ARF6",27
GO:1903169,"GO:1903169","regulation of calcium ion transmembrane transport","8/473","93/11852",0.0320915534648516,0.0320915534648516,0.927453163534563,"FKBP1A/THADA/F2R/PIK3CG/FYN/TMEM38B/CALM2/CALM1",8
GO:0010611,"GO:0010611","regulation of cardiac muscle hypertrophy","5/473","45/11852",0.0326163639043543,0.0326163639043543,0.927453163534563,"SMAD4/PDE5A/JARID2/PTK2/MTPN",5
GO:0014743,"GO:0014743","regulation of muscle hypertrophy","5/473","45/11852",0.0326163639043543,0.0326163639043543,0.927453163534563,"SMAD4/PDE5A/JARID2/PTK2/MTPN",5
GO:0043954,"GO:0043954","cellular component maintenance","5/473","45/11852",0.0326163639043543,0.0326163639043543,0.927453163534563,"ZMYND8/F2R/FYN/DLG3/ARF6",5
GO:0010880,"GO:0010880","regulation of release of sequestered calcium ion into cytosol by sarcoplasmic reticulum","3/473","18/11852",0.0329882462732476,0.0329882462732476,0.927453163534563,"TMEM38B/CALM2/CALM1",3
GO:0010882,"GO:0010882","regulation of cardiac muscle contraction by calcium ion signaling","3/473","18/11852",0.0329882462732476,0.0329882462732476,0.927453163534563,"TMEM38B/CALM2/CALM1",3
GO:0044346,"GO:0044346","fibroblast apoptotic process","3/473","18/11852",0.0329882462732476,0.0329882462732476,0.927453163534563,"PIK3CG/STK17A/IER3IP1",3
GO:0060314,"GO:0060314","regulation of ryanodine-sensitive calcium-release channel activity","3/473","18/11852",0.0329882462732476,0.0329882462732476,0.927453163534563,"FKBP1A/CALM2/CALM1",3
GO:0097106,"GO:0097106","postsynaptic density organization","3/473","18/11852",0.0329882462732476,0.0329882462732476,0.927453163534563,"ZMYND8/DLG3/ARF6",3
GO:0099084,"GO:0099084","postsynaptic specialization organization","3/473","18/11852",0.0329882462732476,0.0329882462732476,0.927453163534563,"ZMYND8/DLG3/ARF6",3
GO:0016601,"GO:0016601","Rac protein signal transduction","4/473","31/11852",0.0335989581291978,0.0335989581291978,0.927453163534563,"CADM4/HACE1/RHOU/ARF6",4
GO:0071108,"GO:0071108","protein K48-linked deubiquitination","4/473","31/11852",0.0335989581291978,0.0335989581291978,0.927453163534563,"USP19/MINDY1/MINDY3/ATXN3",4
GO:0071539,"GO:0071539","protein localization to centrosome","4/473","31/11852",0.0335989581291978,0.0335989581291978,0.927453163534563,"C2CD3/SPAG5/HOOK3/SNX10",4
GO:0010256,"GO:0010256","endomembrane system organization","22/473","363/11852",0.0338817441928723,0.0338817441928723,0.927453163534563,"MYO18A/GOLGA2/TRAPPC11/CCNB2/TSG101/F2R/AKTIP/GOLPH3L/PDCD6IP/HOOK3/CIT/STX2/HACE1/TMEM38B/CLCN3/TMED7/RAB10/SNX10/VMP1/VAMP4/CHMP1B/ZMPSTE24",22
GO:0006942,"GO:0006942","regulation of striated muscle contraction","6/473","61/11852",0.034155592407009,0.034155592407009,0.927453163534563,"PIK3CG/PDE5A/DSC2/TMEM38B/CALM2/CALM1",6
GO:0140014,"GO:0140014","mitotic nuclear division","16/473","243/11852",0.0343331572044036,0.0343331572044036,0.927453163534563,"GOLGA2/CDC25C/SMC4/SPAG5/TPX2/CDC14B/NUF2/NEK2/NCAPG/BORA/TTK/BUB1/CENPK/NDC80/CDKN1B/CHMP1B",16
GO:0008608,"GO:0008608","attachment of spindle microtubules to kinetochore","4/473","32/11852",0.0372296247791854,0.0372296247791854,0.927453163534563,"SPAG5/NUF2/NEK2/NDC80",4
GO:0031055,"GO:0031055","chromatin remodeling at centromere","4/473","32/11852",0.0372296247791854,0.0372296247791854,0.927453163534563,"HJURP/CENPW/CENPK/CENPI",4
GO:1905508,"GO:1905508","protein localization to microtubule organizing center","4/473","32/11852",0.0372296247791854,0.0372296247791854,0.927453163534563,"C2CD3/SPAG5/HOOK3/SNX10",4
GO:0071496,"GO:0071496","cellular response to external stimulus","17/473","266/11852",0.0379637882096109,0.0379637882096109,0.927453163534563,"KANK2/EIF2AK4/WIPI1/GABARAPL1/SLC38A2/PDK4/FYN/CASP8/DSC2/EIF2AK2/RRAGA/AQP3/MDM2/MTPN/RALB/GABARAPL2/GLRX2",17
GO:0003148,"GO:0003148","outflow tract septum morphogenesis","3/473","19/11852",0.0380444786314985,0.0380444786314985,0.927453163534563,"SMAD4/NRP1/TGFBR2",3
GO:0007340,"GO:0007340","acrosome reaction","3/473","19/11852",0.0380444786314985,0.0380444786314985,0.927453163534563,"STXBP1/STX2/ABHD2",3
GO:0014808,"GO:0014808","release of sequestered calcium ion into cytosol by sarcoplasmic reticulum","3/473","19/11852",0.0380444786314985,0.0380444786314985,0.927453163534563,"TMEM38B/CALM2/CALM1",3
GO:0050892,"GO:0050892","intestinal absorption","3/473","19/11852",0.0380444786314985,0.0380444786314985,0.927453163534563,"TJP2/EPB41/LDLR",3
GO:0140058,"GO:0140058","neuron projection arborization","3/473","19/11852",0.0380444786314985,0.0380444786314985,0.927453163534563,"MAP3K13/NRP1/SEMA3A",3
GO:1901020,"GO:1901020","negative regulation of calcium ion transmembrane transporter activity","3/473","19/11852",0.0380444786314985,0.0380444786314985,0.927453163534563,"THADA/CALM2/CALM1",3
GO:1903514,"GO:1903514","release of sequestered calcium ion into cytosol by endoplasmic reticulum","3/473","19/11852",0.0380444786314985,0.0380444786314985,0.927453163534563,"TMEM38B/CALM2/CALM1",3
GO:0000186,"GO:0000186","activation of MAPKK activity","5/473","47/11852",0.0384093065954119,0.0384093065954119,0.927453163534563,"MAP3K3/F2R/MAP3K13/TNIK/EIF2AK2",5
GO:1903901,"GO:1903901","negative regulation of viral life cycle","6/473","63/11852",0.0391409819571214,0.0391409819571214,0.927453163534563,"EIF2AK4/TRIM5/MAVS/EIF2AK2/TRIM6/VAPA",6
GO:0043122,"GO:0043122","regulation of I-kappaB kinase/NF-kappaB signaling","13/473","189/11852",0.0396019152793186,0.0396019152793186,0.927453163534563,"FKBP1A/MAP3K3/MIB2/TRIM5/F2R/IRAK4/FYN/CASP8/MAVS/EDAR/STAT1/NDFIP1/VAPA",13
GO:1904375,"GO:1904375","regulation of protein localization to cell periphery","8/473","97/11852",0.0397654110893363,0.0397654110893363,0.927453163534563,"EPB41/GPSM2/SORBS1/PPP2R5A/STX7/TMEM59/GNAI1/ARF6",8
GO:0046427,"GO:0046427","positive regulation of JAK-STAT cascade","5/473","48/11852",0.0415264970717683,0.0415264970717683,0.927453163534563,"F2R/ARL2BP/FYN/CYP1B1/IL18",5
GO:0007264,"GO:0007264","small GTPase mediated signal transduction","27/473","476/11852",0.0416770713149935,0.0416770713149935,0.927453163534563,"MADD/ARHGAP26/KANK2/CADM4/STAMBP/RALGPS2/GPSM2/VAV3/SOS2/F2R/IQGAP3/ARHGEF37/ARHGEF40/RAB6A/NRP1/RHOBTB1/MCF2L/HACE1/RAB6B/FBXO8/RIT1/RAP1B/RALB/RHOBTB3/RAB10/RHOU/ARF6",27
GO:0006334,"GO:0006334","nucleosome assembly","6/473","64/11852",0.041798074017654,0.041798074017654,0.927453163534563,"HJURP/KAT6B/CENPW/ASF1A/CENPK/CENPI",6
GO:0030282,"GO:0030282","bone mineralization","6/473","64/11852",0.041798074017654,0.041798074017654,0.927453163534563,"NBR1/ZBTB40/TMEM38B/LGR4/SNX10/ZMPSTE24",6
GO:0120031,"GO:0120031","plasma membrane bounded cell projection assembly","26/473","455/11852",0.041821664746651,0.041821664746651,0.927453163534563,"HDAC6/C2CD3/CDKL5/IFT43/ZMYND8/NEK1/IFT80/VAV3/DYNC2LI1/KIF3C/FAM92A/TNIK/CDC14B/GAS8/CARMIL1/NRP1/ODF2L/NEK2/BBS2/BBS10/SNX10/KIFAP3/TCTEX1D2/BBS9/CEP57/ARF6",26
GO:0006892,"GO:0006892","post-Golgi vesicle-mediated transport","8/473","98/11852",0.0418594907689348,0.0418594907689348,0.927453163534563,"STXBP6/WIPI1/GOLPH3L/SORL1/EXOC6B/SNAP23/BBS2/RAB10",8
GO:0014065,"GO:0014065","phosphatidylinositol 3-kinase signaling","8/473","98/11852",0.0418594907689348,0.0418594907689348,0.927453163534563,"STAMBP/F2R/PIK3CG/FYN/CEP55/PTK2/PPP2R5C/IL18",8
GO:0090257,"GO:0090257","regulation of muscle system process","11/473","153/11852",0.0426078371947119,0.0426078371947119,0.927453163534563,"SMAD4/F2R/PIK3CG/PDE5A/DSC2/JARID2/PTK2/TMEM38B/MTPN/CALM2/CALM1",11
GO:0006293,"GO:0006293","nucleotide-excision repair, preincision complex stabilization","3/473","20/11852",0.0434711040581433,0.0434711040581433,0.927453163534563,"CUL4B/XPA/GTF2H5",3
GO:0006295,"GO:0006295","nucleotide-excision repair, DNA incision, 3'-to lesion","3/473","20/11852",0.0434711040581433,0.0434711040581433,0.927453163534563,"CUL4B/XPA/GTF2H5",3
GO:0048483,"GO:0048483","autonomic nervous system development","3/473","20/11852",0.0434711040581433,0.0434711040581433,0.927453163534563,"NRP1/SOX4/SEMA3A",3
GO:0060632,"GO:0060632","regulation of microtubule-based movement","3/473","20/11852",0.0434711040581433,0.0434711040581433,0.927453163534563,"HDAC6/BBS2/TCTEX1D2",3
GO:0033559,"GO:0033559","unsaturated fatty acid metabolic process","6/473","65/11852",0.0445661577769302,0.0445661577769302,0.927453163534563,"ACOX1/ZADH2/FAAH2/CBR1/CYP1B1/PNPLA8",6
GO:2000756,"GO:2000756","regulation of peptidyl-lysine acetylation","5/473","49/11852",0.0447922440826405,0.0447922440826405,0.927453163534563,"SMAD4/SDR16C5/SOX4/EID1/ZMPSTE24",5
GO:0006084,"GO:0006084","acetyl-CoA metabolic process","4/473","34/11852",0.0451410008133155,0.0451410008133155,0.927453163534563,"ACSS2/PDK4/PDP1/PPCS",4
GO:0048538,"GO:0048538","thymus development","4/473","34/11852",0.0451410008133155,0.0451410008133155,0.927453163534563,"PBX1/CCNB2/JARID2/ZMPSTE24",4
GO:0097502,"GO:0097502","mannosylation","4/473","34/11852",0.0451410008133155,0.0451410008133155,0.927453163534563,"PIGB/B4GAT1/DPY19L4/DPY19L1",4
GO:0044839,"GO:0044839","cell cycle G2/M phase transition","16/473","252/11852",0.0453709514481954,0.0453709514481954,0.927453163534563,"PBX1/CDC25B/CDC25C/ABRAXAS1/CCNB2/HMMR/MTA3/TPX2/CDC14B/CIT/ZFYVE19/NEK2/BORA/PSMD5/MELK/CEP57",16
GO:0042594,"GO:0042594","response to starvation","11/473","156/11852",0.0478742175815381,0.0478742175815381,0.927453163534563,"EIF2AK4/WIPI1/GABARAPL1/SLC38A2/PDK4/DSC2/TBC1D5/EIF2AK2/RRAGA/RALB/GABARAPL2",11
GO:1904894,"GO:1904894","positive regulation of STAT cascade","5/473","50/11852",0.048207279574641,0.048207279574641,0.927453163534563,"F2R/ARL2BP/FYN/CYP1B1/IL18",5
GO:0000717,"GO:0000717","nucleotide-excision repair, DNA duplex unwinding","3/473","21/11852",0.0492611760002907,0.0492611760002907,0.927453163534563,"CUL4B/XPA/GTF2H5",3
GO:0003091,"GO:0003091","renal water homeostasis","3/473","21/11852",0.0492611760002907,0.0492611760002907,0.927453163534563,"ADCY7/AQP3/PRKAR1A",3
GO:0010742,"GO:0010742","macrophage derived foam cell differentiation","3/473","21/11852",0.0492611760002907,0.0492611760002907,0.927453163534563,"ABCA5/STAT1/IL18",3
GO:0039702,"GO:0039702","viral budding via host ESCRT complex","3/473","21/11852",0.0492611760002907,0.0492611760002907,0.927453163534563,"TSG101/PDCD6IP/CHMP1B",3
GO:0090077,"GO:0090077","foam cell differentiation","3/473","21/11852",0.0492611760002907,0.0492611760002907,0.927453163534563,"ABCA5/STAT1/IL18",3
GO:0002448,"GO:0002448","mast cell mediated immunity","4/473","35/11852",0.0494214924328997,0.0494214924328997,0.927453163534563,"SERPINB9/PIK3CG/STXBP1/SNAP23",4
GO:0006904,"GO:0006904","vesicle docking involved in exocytosis","4/473","35/11852",0.0494214924328997,0.0494214924328997,0.927453163534563,"STXBP1/EXOC6B/RALB/RAB10",4
GO:0033628,"GO:0033628","regulation of cell adhesion mediated by integrin","4/473","35/11852",0.0494214924328997,0.0494214924328997,0.927453163534563,"DPP4/PIK3CG/PTK2/CYP1B1",4
GO:0048640,"GO:0048640","negative regulation of developmental growth","7/473","84/11852",0.0501658792725864,0.0501658792725864,0.927453163534563,"JARID2/NRP1/TGFBR2/PTK2/BBS2/CDKN1B/SEMA3A",7
GO:0007030,"GO:0007030","Golgi organization","9/473","120/11852",0.0505738966775364,0.0505738966775364,0.927453163534563,"MYO18A/GOLGA2/TRAPPC11/GOLPH3L/CIT/HACE1/TMED7/VMP1/VAMP4",9
GO:0007249,"GO:0007249","I-kappaB kinase/NF-kappaB signaling","14/473","216/11852",0.0509599665698187,0.0509599665698187,0.927453163534563,"ERC1/FKBP1A/MAP3K3/MIB2/TRIM5/F2R/IRAK4/FYN/CASP8/MAVS/EDAR/STAT1/NDFIP1/VAPA",14
GO:0009108,"GO:0009108","coenzyme biosynthetic process","14/473","216/11852",0.0509599665698187,0.0509599665698187,0.927453163534563,"NCOR1/ACSS2/PDK4/TPK1/PGM2L1/MOCS2/COQ5/DCAKD/COQ10B/MMADHC/PDP1/NUDT12/MAT2B/PPCS",14
GO:0030168,"GO:0030168","platelet activation","8/473","102/11852",0.0509613972740852,0.0509613972740852,0.927453163534563,"ILK/VAV3/F2R/PIK3CG/FYN/GNAQ/STXBP1/C1GALT1C1",8
GO:0032147,"GO:0032147","activation of protein kinase activity","16/473","256/11852",0.0510085932884357,0.0510085932884357,0.927453163534563,"MADD/MAP3K3/GPRC5C/ADCY7/NEK1/F2R/IQGAP3/TPX2/MAP3K13/TNIK/EIF2AK2/TGFBR2/PRKAR1A/BORA/MDFIC/IL18",16
GO:0051279,"GO:0051279","regulation of release of sequestered calcium ion into cytosol","5/473","51/11852",0.0517720781226332,0.0517720781226332,0.927453163534563,"FKBP1A/F2R/TMEM38B/CALM2/CALM1",5
GO:1904377,"GO:1904377","positive regulation of protein localization to cell periphery","5/473","51/11852",0.0517720781226332,0.0517720781226332,0.927453163534563,"EPB41/GPSM2/SORBS1/GNAI1/ARF6",5
GO:0007059,"GO:0007059","chromosome segregation","17/473","277/11852",0.0520804980536356,0.0520804980536356,0.927453163534563,"AGO4/SMC4/HJURP/SPAG5/NUF2/CENPW/MLH3/NEK2/SKA2/NCAPG/TTK/BUB1/CENPK/SKA1/SPC25/NDC80/CHMP1B",17
GO:0043044,"GO:0043044","ATP-dependent chromatin remodeling","6/473","68/11852",0.0535443742752414,0.0535443742752414,0.927453163534563,"HJURP/SMARCA2/MBD2/CENPW/CENPK/CENPI",6
GO:0072395,"GO:0072395","signal transduction involved in cell cycle checkpoint","6/473","68/11852",0.0535443742752414,0.0535443742752414,0.927453163534563,"CDC25C/ABRAXAS1/CDC14B/MDM2/SOX4/CDKN1B",6
GO:0072401,"GO:0072401","signal transduction involved in DNA integrity checkpoint","6/473","68/11852",0.0535443742752414,0.0535443742752414,0.927453163534563,"CDC25C/ABRAXAS1/CDC14B/MDM2/SOX4/CDKN1B",6
GO:0072422,"GO:0072422","signal transduction involved in DNA damage checkpoint","6/473","68/11852",0.0535443742752414,0.0535443742752414,0.927453163534563,"CDC25C/ABRAXAS1/CDC14B/MDM2/SOX4/CDKN1B",6
GO:0003179,"GO:0003179","heart valve morphogenesis","4/473","36/11852",0.0539174666159265,0.0539174666159265,0.927453163534563,"SMAD4/TGFBR2/MDM2/SOX4",4
GO:0030010,"GO:0030010","establishment of cell polarity","9/473","122/11852",0.0551014003369236,0.0551014003369236,0.927453163534563,"MYO18A/FRMD4B/GPSM2/RUFY3/PTK2/RAP1B/RAB10/NDC80/ARF6",9
GO:0007097,"GO:0007097","nuclear migration","3/473","22/11852",0.0554064996328058,0.0554064996328058,0.927453163534563,"HOOK3/CLMN/PTK2",3
GO:0035268,"GO:0035268","protein mannosylation","3/473","22/11852",0.0554064996328058,0.0554064996328058,0.927453163534563,"B4GAT1/DPY19L4/DPY19L1",3
GO:1903170,"GO:1903170","negative regulation of calcium ion transmembrane transport","3/473","22/11852",0.0554064996328058,0.0554064996328058,0.927453163534563,"THADA/CALM2/CALM1",3
GO:0014909,"GO:0014909","smooth muscle cell migration","5/473","52/11852",0.0554868606043995,0.0554868606043995,0.927453163534563,"ILK/PLAT/SORL1/NRP1/MDM2",5
GO:0051056,"GO:0051056","regulation of small GTPase mediated signal transduction","17/473","280/11852",0.0564977072291038,0.0564977072291038,0.927453163534563,"MADD/ARHGAP26/KANK2/CADM4/STAMBP/RALGPS2/VAV3/SOS2/F2R/ARHGEF37/ARHGEF40/NRP1/RHOBTB1/MCF2L/FBXO8/RHOU/ARF6",17
GO:0006995,"GO:0006995","cellular response to nitrogen starvation","2/473","10/11852",0.0578471260938579,0.0578471260938579,0.927453163534563,"GABARAPL1/GABARAPL2",2
GO:0007130,"GO:0007130","synaptonemal complex assembly","2/473","10/11852",0.0578471260938579,0.0578471260938579,0.927453163534563,"AGO4/MLH3",2
GO:0007256,"GO:0007256","activation of JNKK activity","2/473","10/11852",0.0578471260938579,0.0578471260938579,0.927453163534563,"MAP3K13/TNIK",2
GO:0007350,"GO:0007350","blastoderm segmentation","2/473","10/11852",0.0578471260938579,0.0578471260938579,0.927453163534563,"NRP1/SEMA3A",2
GO:0009086,"GO:0009086","methionine biosynthetic process","2/473","10/11852",0.0578471260938579,0.0578471260938579,0.927453163534563,"MTHFD2L/ADI1",2
GO:0009143,"GO:0009143","nucleoside triphosphate catabolic process","2/473","10/11852",0.0578471260938579,0.0578471260938579,0.927453163534563,"SAMHD1/SMPDL3A",2
GO:0010998,"GO:0010998","regulation of translational initiation by eIF2 alpha phosphorylation","2/473","10/11852",0.0578471260938579,0.0578471260938579,0.927453163534563,"EIF2AK4/EIF2AK2",2
GO:0015937,"GO:0015937","coenzyme A biosynthetic process","2/473","10/11852",0.0578471260938579,0.0578471260938579,0.927453163534563,"DCAKD/PPCS",2
GO:0032105,"GO:0032105","negative regulation of response to extracellular stimulus","2/473","10/11852",0.0578471260938579,0.0578471260938579,0.927453163534563,"KANK2/BBS2",2
GO:0032108,"GO:0032108","negative regulation of response to nutrient levels","2/473","10/11852",0.0578471260938579,0.0578471260938579,0.927453163534563,"KANK2/BBS2",2
GO:0034058,"GO:0034058","endosomal vesicle fusion","2/473","10/11852",0.0578471260938579,0.0578471260938579,0.927453163534563,"VPS39/SAMD9L",2
GO:0043562,"GO:0043562","cellular response to nitrogen levels","2/473","10/11852",0.0578471260938579,0.0578471260938579,0.927453163534563,"GABARAPL1/GABARAPL2",2
GO:0046641,"GO:0046641","positive regulation of alpha-beta T cell proliferation","2/473","10/11852",0.0578471260938579,0.0578471260938579,0.927453163534563,"TGFBR2/IL18",2
GO:0051284,"GO:0051284","positive regulation of sequestering of calcium ion","2/473","10/11852",0.0578471260938579,0.0578471260938579,0.927453163534563,"CALM2/CALM1",2
GO:0051657,"GO:0051657","maintenance of organelle location","2/473","10/11852",0.0578471260938579,0.0578471260938579,0.927453163534563,"GPSM2/ASPM",2
GO:0071285,"GO:0071285","cellular response to lithium ion","2/473","10/11852",0.0578471260938579,0.0578471260938579,0.927453163534563,"ADCY7/CDKN1B",2
GO:0098734,"GO:0098734","macromolecule depalmitoylation","2/473","10/11852",0.0578471260938579,0.0578471260938579,0.927453163534563,"ABHD17C/LYPLAL1",2
GO:1902946,"GO:1902946","protein localization to early endosome","2/473","10/11852",0.0578471260938579,0.0578471260938579,0.927453163534563,"SORL1/NRP1",2
GO:0010799,"GO:0010799","regulation of peptidyl-threonine phosphorylation","4/473","37/11852",0.0586274886865985,0.0586274886865985,0.927453163534563,"CADM4/TRIM6/CALM2/CALM1",4
GO:0070302,"GO:0070302","regulation of stress-activated protein kinase signaling cascade","12/473","181/11852",0.0587476715275527,0.0587476715275527,0.927453163534563,"NCOR1/MAP3K3/NBR1/MAP3K13/TNIK/EIF2AK2/EDAR/ARL6IP5/MDFIC/ZMPSTE24/SEMA3A/PBK",12
GO:0060411,"GO:0060411","cardiac septum morphogenesis","5/473","53/11852",0.0593515985710936,0.0593515985710936,0.927453163534563,"SMAD4/NRP1/TGFBR2/MDM2/SOX4",5
GO:0006446,"GO:0006446","regulation of translational initiation","6/473","70/11852",0.0600970567440719,0.0600970567440719,0.927453163534563,"EIF2AK4/EIF2AK2/PAIP2B/PAIP2/PAIP1/C8orf88",6
GO:0008361,"GO:0008361","regulation of cell size","10/473","143/11852",0.0601499283305817,0.0601499283305817,0.927453163534563,"ILK/CDKL5/VAV3/IQGAP3/RUFY3/MAP3K13/NRP1/MTPN/CLCN3/SEMA3A",10
GO:0031032,"GO:0031032","actomyosin structure organization","10/473","143/11852",0.0601499283305817,0.0601499283305817,0.927453163534563,"MYO18A/SMAD4/PHLDB2/EPB41/SORBS1/PDCD6IP/CARMIL1/CIT/NRP1/PRKAR1A",10
GO:0097553,"GO:0097553","calcium ion transmembrane import into cytosol","7/473","88/11852",0.0615710018240788,0.0615710018240788,0.927453163534563,"FKBP1A/PLCH1/F2R/FYN/TMEM38B/CALM2/CALM1",7
GO:0007266,"GO:0007266","Rho protein signal transduction","11/473","163/11852",0.0618380468674063,0.0618380468674063,0.927453163534563,"KANK2/VAV3/SOS2/F2R/ARHGEF37/ARHGEF40/NRP1/RHOBTB1/MCF2L/RHOBTB3/RHOU",11
GO:0003203,"GO:0003203","endocardial cushion morphogenesis","3/473","23/11852",0.0618977899212174,0.0618977899212174,0.927453163534563,"SMAD4/TGFBR2/MDM2",3
GO:0010613,"GO:0010613","positive regulation of cardiac muscle hypertrophy","3/473","23/11852",0.0618977899212174,0.0618977899212174,0.927453163534563,"PDE5A/PTK2/MTPN",3
GO:0010800,"GO:0010800","positive regulation of peptidyl-threonine phosphorylation","3/473","23/11852",0.0618977899212174,0.0618977899212174,0.927453163534563,"TRIM6/CALM2/CALM1",3
GO:0014742,"GO:0014742","positive regulation of muscle hypertrophy","3/473","23/11852",0.0618977899212174,0.0618977899212174,0.927453163534563,"PDE5A/PTK2/MTPN",3
GO:0046461,"GO:0046461","neutral lipid catabolic process","3/473","23/11852",0.0618977899212174,0.0618977899212174,0.927453163534563,"PIK3CG/SORL1/ABHD2",3
GO:0046464,"GO:0046464","acylglycerol catabolic process","3/473","23/11852",0.0618977899212174,0.0618977899212174,0.927453163534563,"PIK3CG/SORL1/ABHD2",3
GO:0060969,"GO:0060969","negative regulation of gene silencing","3/473","23/11852",0.0618977899212174,0.0618977899212174,0.927453163534563,"NCOR1/ASF1A/ZMPSTE24",3
GO:0090207,"GO:0090207","regulation of triglyceride metabolic process","3/473","23/11852",0.0618977899212174,0.0618977899212174,0.927453163534563,"PIK3CG/SORL1/LDLR",3
GO:0050768,"GO:0050768","negative regulation of neurogenesis","13/473","203/11852",0.0631439839961987,0.0631439839961987,0.927453163534563,"PBX1/EIF2AK4/ASPM/RUFY3/HOOK3/SORL1/NRP1/LDLR/PTK2/MDM2/DIXDC1/ARF6/SEMA3A",13
GO:0014068,"GO:0014068","positive regulation of phosphatidylinositol 3-kinase signaling","5/473","54/11852",0.0633660192548464,0.0633660192548464,0.927453163534563,"F2R/PIK3CG/FYN/PTK2/IL18",5
GO:0070936,"GO:0070936","protein K48-linked ubiquitination","5/473","54/11852",0.0633660192548464,0.0633660192548464,0.927453163534563,"UBE2H/RFFL/HACE1/UBE2D1/UBE2Q2",5
GO:0000281,"GO:0000281","mitotic cytokinesis","6/473","71/11852",0.0635444971136276,0.0635444971136276,0.927453163534563,"STAMBP/CEP55/PDCD6IP/CIT/SNX18/CHMP1B",6
GO:0045843,"GO:0045843","negative regulation of striated muscle tissue development","4/473","38/11852",0.0635496382106635,0.0635496382106635,0.927453163534563,"SMAD4/USP19/JARID2/TGFBR2",4
GO:0030705,"GO:0030705","cytoskeleton-dependent intracellular transport","11/473","164/11852",0.0640296165681823,0.0640296165681823,0.927453163534563,"IFT43/IFT80/DYNC2LI1/RAB6A/PURA/KIF3C/TTC30A/HOOK3/ACTR10/KIFAP3/TCTEX1D2",11
GO:0000070,"GO:0000070","mitotic sister chromatid segregation","10/473","145/11852",0.0648202707910606,0.0648202707910606,0.927453163534563,"SMC4/SPAG5/NUF2/NEK2/NCAPG/TTK/BUB1/CENPK/NDC80/CHMP1B",10
GO:0048015,"GO:0048015","phosphatidylinositol-mediated signaling","9/473","126/11852",0.0649261870244387,0.0649261870244387,0.927453163534563,"STAMBP/PLCH1/F2R/PIK3CG/FYN/CEP55/PTK2/PPP2R5C/IL18",9
GO:0044242,"GO:0044242","cellular lipid catabolic process","11/473","165/11852",0.0662712430557718,0.0662712430557718,0.927453163534563,"GM2A/ACOX1/PIK3CG/AUH/SORL1/LDLR/EHHADH/ABHD2/ABHD3/CYP1B1/PNPLA8",11
GO:1903522,"GO:1903522","regulation of blood circulation","11/473","165/11852",0.0662712430557718,0.0662712430557718,0.927453163534563,"KCNMB4/F2R/PIK3CG/PDE5A/DSC2/MDM2/TMEM38B/CALM2/CALM1/ZMPSTE24/SEMA3A",11
GO:0051851,"GO:0051851","modification by host of symbiont morphology or physiology","5/473","55/11852",0.0675296111564121,0.0675296111564121,0.927453163534563,"EIF2AK4/CALM2/VAPA/SUGT1/CALM1",5
GO:0030866,"GO:0030866","cortical actin cytoskeleton organization","4/473","39/11852",0.0686815347047015,0.0686815347047015,0.927453163534563,"EPB41/PDCD6IP/CIT/ARF6",4
GO:0031952,"GO:0031952","regulation of protein autophosphorylation","4/473","39/11852",0.0686815347047015,0.0686815347047015,0.927453163534563,"PPP2R5A/CALM2/CALM1/PPP2R5C",4
GO:0032506,"GO:0032506","cytokinetic process","4/473","39/11852",0.0686815347047015,0.0686815347047015,0.927453163534563,"CEP55/PDCD6IP/SNX18/CHMP1B",4
GO:0048635,"GO:0048635","negative regulation of muscle organ development","4/473","39/11852",0.0686815347047015,0.0686815347047015,0.927453163534563,"SMAD4/USP19/JARID2/TGFBR2",4
GO:0070192,"GO:0070192","chromosome organization involved in meiotic cell cycle","4/473","39/11852",0.0686815347047015,0.0686815347047015,0.927453163534563,"AGO4/SMC4/MLH3/BUB1",4
GO:0006929,"GO:0006929","substrate-dependent cell migration","3/473","24/11852",0.0687248172305323,0.0687248172305323,0.927453163534563,"ANKS1A/NRP1/SEMA3A",3
GO:0045494,"GO:0045494","photoreceptor cell maintenance","3/473","24/11852",0.0687248172305323,0.0687248172305323,0.927453163534563,"BBS2/BBS10/DRAM2",3
GO:0050798,"GO:0050798","activated T cell proliferation","3/473","24/11852",0.0687248172305323,0.0687248172305323,0.927453163534563,"FYN/PRKAR1A/IL18",3
GO:0051647,"GO:0051647","nucleus localization","3/473","24/11852",0.0687248172305323,0.0687248172305323,0.927453163534563,"HOOK3/CLMN/PTK2",3
GO:1902410,"GO:1902410","mitotic cytokinetic process","3/473","24/11852",0.0687248172305323,0.0687248172305323,0.927453163534563,"CEP55/PDCD6IP/CHMP1B",3
GO:0007183,"GO:0007183","SMAD protein complex assembly","2/473","11/11852",0.0688796171440723,0.0688796171440723,0.927453163534563,"FKBP1A/SMAD4",2
GO:0010523,"GO:0010523","negative regulation of calcium ion transport into cytosol","2/473","11/11852",0.0688796171440723,0.0688796171440723,0.927453163534563,"CALM2/CALM1",2
GO:0021783,"GO:0021783","preganglionic parasympathetic fiber development","2/473","11/11852",0.0688796171440723,0.0688796171440723,0.927453163534563,"NRP1/SEMA3A",2
GO:0048486,"GO:0048486","parasympathetic nervous system development","2/473","11/11852",0.0688796171440723,0.0688796171440723,0.927453163534563,"NRP1/SEMA3A",2
GO:0048532,"GO:0048532","anatomical structure arrangement","2/473","11/11852",0.0688796171440723,0.0688796171440723,0.927453163534563,"NRP1/SEMA3A",2
GO:0051447,"GO:0051447","negative regulation of meiotic cell cycle","2/473","11/11852",0.0688796171440723,0.0688796171440723,0.927453163534563,"PRKAR1A/TTK",2
GO:0060044,"GO:0060044","negative regulation of cardiac muscle cell proliferation","2/473","11/11852",0.0688796171440723,0.0688796171440723,0.927453163534563,"JARID2/TGFBR2",2
GO:0060340,"GO:0060340","positive regulation of type I interferon-mediated signaling pathway","2/473","11/11852",0.0688796171440723,0.0688796171440723,0.927453163534563,"MAVS/TRIM6",2
GO:0061548,"GO:0061548","ganglion development","2/473","11/11852",0.0688796171440723,0.0688796171440723,0.927453163534563,"NRP1/SEMA3A",2
GO:0070914,"GO:0070914","UV-damage excision repair","2/473","11/11852",0.0688796171440723,0.0688796171440723,0.927453163534563,"CUL4B/XPA",2
GO:1902287,"GO:1902287","semaphorin-plexin signaling pathway involved in axon guidance","2/473","11/11852",0.0688796171440723,0.0688796171440723,0.927453163534563,"NRP1/SEMA3A",2
GO:1904469,"GO:1904469","positive regulation of tumor necrosis factor secretion","2/473","11/11852",0.0688796171440723,0.0688796171440723,0.927453163534563,"FRMD8/MAVS",2
GO:1904668,"GO:1904668","positive regulation of ubiquitin protein ligase activity","2/473","11/11852",0.0688796171440723,0.0688796171440723,0.927453163534563,"GOLGA2/CDC14B",2
GO:1905668,"GO:1905668","positive regulation of protein localization to endosome","2/473","11/11852",0.0688796171440723,0.0688796171440723,0.927453163534563,"ABHD17C/SORL1",2
GO:0010970,"GO:0010970","transport along microtubule","10/473","147/11852",0.0697175672423369,0.0697175672423369,0.927453163534563,"IFT43/IFT80/DYNC2LI1/RAB6A/PURA/KIF3C/TTC30A/ACTR10/KIFAP3/TCTEX1D2",10
GO:0099111,"GO:0099111","microtubule-based transport","10/473","147/11852",0.0697175672423369,0.0697175672423369,0.927453163534563,"IFT43/IFT80/DYNC2LI1/RAB6A/PURA/KIF3C/TTC30A/ACTR10/KIFAP3/TCTEX1D2",10
GO:0051656,"GO:0051656","establishment of organelle localization","23/473","415/11852",0.0698072602140844,0.0698072602140844,0.927453163534563,"GOLGA2/GPSM2/WIPI1/PIK3CG/SPAG5/TRAPPC6B/RAB6A/KIF3C/STXBP1/HOOK3/CLMN/NUF2/STX2/PTK2/RAP1B/ACTR10/SNAP23/BBS2/NDC80/TMEM230/KIFAP3/STARD3NL/CHMP1B",23
GO:0016042,"GO:0016042","lipid catabolic process","14/473","227/11852",0.0708067354468299,0.0708067354468299,0.927453163534563,"GM2A/ACOX1/PLCH1/PIK3CG/AUH/SORL1/LDLR/EHHADH/ABHD2/ABHD3/PAFAH1B2/LIPH/CYP1B1/PNPLA8",14
GO:0002027,"GO:0002027","regulation of heart rate","5/473","56/11852",0.0718416301574313,0.0718416301574313,0.927453163534563,"DSC2/MDM2/CALM2/CALM1/SEMA3A",5
GO:0072088,"GO:0072088","nephron epithelium morphogenesis","5/473","56/11852",0.0718416301574313,0.0718416301574313,0.927453163534563,"ILK/PBX1/SMAD4/STAT1/LGR4",5
GO:0048017,"GO:0048017","inositol lipid-mediated signaling","9/473","129/11852",0.0729783062285104,0.0729783062285104,0.927453163534563,"STAMBP/PLCH1/F2R/PIK3CG/FYN/CEP55/PTK2/PPP2R5C/IL18",9
GO:0034508,"GO:0034508","centromere complex assembly","4/473","40/11852",0.0740203636767997,0.0740203636767997,0.927453163534563,"HJURP/CENPW/CENPK/CENPI",4
GO:1901862,"GO:1901862","negative regulation of muscle tissue development","4/473","40/11852",0.0740203636767997,0.0740203636767997,0.927453163534563,"SMAD4/USP19/JARID2/TGFBR2",4
GO:0032465,"GO:0032465","regulation of cytokinesis","6/473","74/11852",0.074571243985796,0.074571243985796,0.927453163534563,"CDC25B/CDC14B/CIT/ZFYVE19/CALM2/CALM1",6
GO:0060337,"GO:0060337","type I interferon signaling pathway","6/473","74/11852",0.074571243985796,0.074571243985796,0.927453163534563,"MAVS/STAT2/SAMHD1/STAT1/IFNAR1/TRIM6",6
GO:0071357,"GO:0071357","cellular response to type I interferon","6/473","74/11852",0.074571243985796,0.074571243985796,0.927453163534563,"MAVS/STAT2/SAMHD1/STAT1/IFNAR1/TRIM6",6
GO:0006732,"GO:0006732","coenzyme metabolic process","19/473","333/11852",0.0748426682339308,0.0748426682339308,0.927453163534563,"ACOT13/NCOR1/ACSS2/PDK4/TPK1/PGM2L1/CBR3/MOCS2/COQ5/DCAKD/COQ10B/MMADHC/ME1/PDP1/MTHFD2L/NUDT12/GGH/MAT2B/PPCS",19
GO:1902115,"GO:1902115","regulation of organelle assembly","11/473","169/11852",0.0757426258636997,0.0757426258636997,0.927453163534563,"SMAD4/CDKL5/GPSM2/DYNC2LI1/TSG101/SPAG5/PDCD6IP/ODF2L/RALB/TCTEX1D2/CHMP1B",11
GO:0043949,"GO:0043949","regulation of cAMP-mediated signaling","3/473","25/11852",0.0758765412916995,0.0758765412916995,0.927453163534563,"CALM2/CALM1/GNAI1",3
GO:0046755,"GO:0046755","viral budding","3/473","25/11852",0.0758765412916995,0.0758765412916995,0.927453163534563,"TSG101/PDCD6IP/CHMP1B",3
GO:0051281,"GO:0051281","positive regulation of release of sequestered calcium ion into cytosol","3/473","25/11852",0.0758765412916995,0.0758765412916995,0.927453163534563,"F2R/CALM2/CALM1",3
GO:0070911,"GO:0070911","global genome nucleotide-excision repair","3/473","25/11852",0.0758765412916995,0.0758765412916995,0.927453163534563,"CUL4B/XPA/GTF2H5",3
GO:0071480,"GO:0071480","cellular response to gamma radiation","3/473","25/11852",0.0758765412916995,0.0758765412916995,0.927453163534563,"MDM2/GTF2H5/ZMPSTE24",3
GO:1903523,"GO:1903523","negative regulation of blood circulation","3/473","25/11852",0.0758765412916995,0.0758765412916995,0.927453163534563,"F2R/PIK3CG/PDE5A",3
GO:0045926,"GO:0045926","negative regulation of growth","12/473","189/11852",0.0759365010549402,0.0759365010549402,0.927453163534563,"APBB2/SMAD4/SMARCA2/JARID2/NRP1/TGFBR2/PTK2/BBS2/CDKN2C/CDKN1B/CDKN2AIP/SEMA3A",12
GO:0072028,"GO:0072028","nephron morphogenesis","5/473","57/11852",0.0763011061037077,0.0763011061037077,0.927453163534563,"ILK/PBX1/SMAD4/STAT1/LGR4",5
GO:0021987,"GO:0021987","cerebral cortex development","7/473","93/11852",0.0778871086971708,0.0778871086971708,0.927453163534563,"TACC1/ASPM/SLC38A2/NRP1/BBS2/DIXDC1/SEMA3A",7
GO:0051701,"GO:0051701","interaction with host","11/473","170/11852",0.078237558412484,0.078237558412484,0.927453163534563,"SERPINB9/DPP4/EIF2AK4/TRIM5/TSG101/CASP8/EIF2AK2/KPNA2/LDLR/RRAGA/VAPA",11
GO:0016236,"GO:0016236","macroautophagy","16/473","272/11852",0.0784271420203897,0.0784271420203897,0.927453163534563,"HDAC6/WIPI1/TSG101/GABARAPL1/NBR1/TBC1D5/LIX1L/RETREG1/RRAGA/PAFAH1B2/ATP6V1A/SNX14/RALB/VMP1/GABARAPL2/SCOC",16
GO:0007338,"GO:0007338","single fertilization","6/473","75/11852",0.0784741886003479,0.0784741886003479,0.927453163534563,"SMAD4/KDM5B/STXBP1/STX2/ABHD2/SPA17",6
GO:1901992,"GO:1901992","positive regulation of mitotic cell cycle phase transition","6/473","75/11852",0.0784741886003479,0.0784741886003479,0.927453163534563,"PBX1/CDC25B/CDC25C/MTA3/CUL4B/MDM2",6
GO:0010721,"GO:0010721","negative regulation of cell development","14/473","231/11852",0.0791350665979622,0.0791350665979622,0.927453163534563,"PBX1/SMAD4/EIF2AK4/ASPM/RUFY3/HOOK3/SORL1/NRP1/LDLR/PTK2/MDM2/DIXDC1/ARF6/SEMA3A",14
GO:0009880,"GO:0009880","embryonic pattern specification","4/473","41/11852",0.0795629028289685,0.0795629028289685,0.927453163534563,"C2CD3/SMAD4/NRP1/SEMA3A",4
GO:0034198,"GO:0034198","cellular response to amino acid starvation","4/473","41/11852",0.0795629028289685,0.0795629028289685,0.927453163534563,"EIF2AK4/SLC38A2/EIF2AK2/RRAGA",4
GO:0035272,"GO:0035272","exocrine system development","4/473","41/11852",0.0795629028289685,0.0795629028289685,0.927453163534563,"IGSF3/NRP1/EDAR/SEMA3A",4
GO:0043486,"GO:0043486","histone exchange","4/473","41/11852",0.0795629028289685,0.0795629028289685,0.927453163534563,"HJURP/CENPW/CENPK/CENPI",4
GO:0000212,"GO:0000212","meiotic spindle organization","2/473","12/11852",0.0805326334066374,0.0805326334066374,0.927453163534563,"GOLGA2/ASPM",2
GO:0006004,"GO:0006004","fucose metabolic process","2/473","12/11852",0.0805326334066374,0.0805326334066374,0.927453163534563,"FUT8/FPGT",2
GO:0006491,"GO:0006491","N-glycan processing","2/473","12/11852",0.0805326334066374,0.0805326334066374,0.927453163534563,"FUT8/MAN1A1",2
GO:0019511,"GO:0019511","peptidyl-proline hydroxylation","2/473","12/11852",0.0805326334066374,0.0805326334066374,0.927453163534563,"P4HA2/P4HA1",2
GO:0021854,"GO:0021854","hypothalamus development","2/473","12/11852",0.0805326334066374,0.0805326334066374,0.927453163534563,"NRP1/SEMA3A",2
GO:0034199,"GO:0034199","activation of protein kinase A activity","2/473","12/11852",0.0805326334066374,0.0805326334066374,0.927453163534563,"ADCY7/PRKAR1A",2
GO:0035458,"GO:0035458","cellular response to interferon-beta","2/473","12/11852",0.0805326334066374,0.0805326334066374,0.927453163534563,"STAT1/TRIM6",2
GO:0036152,"GO:0036152","phosphatidylethanolamine acyl-chain remodeling","2/473","12/11852",0.0805326334066374,0.0805326334066374,0.927453163534563,"MBOAT1/PNPLA8",2
GO:0042574,"GO:0042574","retinal metabolic process","2/473","12/11852",0.0805326334066374,0.0805326334066374,0.927453163534563,"SDR16C5/CYP1B1",2
GO:0045725,"GO:0045725","positive regulation of glycogen biosynthetic process","2/473","12/11852",0.0805326334066374,0.0805326334066374,0.927453163534563,"SORBS1/EPM2AIP1",2
GO:0051988,"GO:0051988","regulation of attachment of spindle microtubules to kinetochore","2/473","12/11852",0.0805326334066374,0.0805326334066374,0.927453163534563,"SPAG5/NEK2",2
GO:0060049,"GO:0060049","regulation of protein glycosylation","2/473","12/11852",0.0805326334066374,0.0805326334066374,0.927453163534563,"GOLGA2/TMEM59",2
GO:0072074,"GO:0072074","kidney mesenchyme development","2/473","12/11852",0.0805326334066374,0.0805326334066374,0.927453163534563,"SMAD4/STAT1",2
GO:0097284,"GO:0097284","hepatocyte apoptotic process","2/473","12/11852",0.0805326334066374,0.0805326334066374,0.927453163534563,"PIK3CG/ARF6",2
GO:1902285,"GO:1902285","semaphorin-plexin signaling pathway involved in neuron projection guidance","2/473","12/11852",0.0805326334066374,0.0805326334066374,0.927453163534563,"NRP1/SEMA3A",2
GO:1905331,"GO:1905331","negative regulation of morphogenesis of an epithelium","2/473","12/11852",0.0805326334066374,0.0805326334066374,0.927453163534563,"PHLDB2/STAT1",2
GO:1905666,"GO:1905666","regulation of protein localization to endosome","2/473","12/11852",0.0805326334066374,0.0805326334066374,0.927453163534563,"ABHD17C/SORL1",2
GO:0003015,"GO:0003015","heart process","11/473","171/11852",0.0807835877436939,0.0807835877436939,0.927453163534563,"PIK3CG/PDE5A/FYN/DSC2/MDM2/TMEM38B/CALM2/CALM1/PPCS/ZMPSTE24/SEMA3A",11
GO:0050688,"GO:0050688","regulation of defense response to virus","5/473","58/11852",0.0809068498078325,0.0809068498078325,0.927453163534563,"EIF2AK4/MAVS/STAT1/TRIM6/ZMPSTE24",5
GO:1901224,"GO:1901224","positive regulation of NIK/NF-kappaB signaling","5/473","58/11852",0.0809068498078325,0.0809068498078325,0.927453163534563,"ILK/EIF2AK2/EDAR/IL18/RTKN2",5
GO:0043666,"GO:0043666","regulation of phosphoprotein phosphatase activity","7/473","94/11852",0.0814257867619741,0.0814257867619741,0.927453163534563,"FKBP1A/RCAN3/EIF2AK2/PPP2R5A/CALM2/CALM1/PPP2R5C",7
GO:0048660,"GO:0048660","regulation of smooth muscle cell proliferation","7/473","94/11852",0.0814257867619741,0.0814257867619741,0.927453163534563,"ILK/IRAK4/TGFBR2/MDM2/STAT1/IL18/CDKN1B",7
GO:0071407,"GO:0071407","cellular response to organic cyclic compound","22/473","401/11852",0.0814327531518701,0.0814327531518701,0.927453163534563,"NCOR1/HDAC6/KANK2/PIK3CG/CASP8/MBD2/NCOA3/MAVS/PGRMC2/ABHD2/CALCOCO1/MDM2/TMEM38B/STAT1/RAP1B/RALB/CYP1B1/UBA5/ARNTL/IL18/GNAI1/CDKN1B",22
GO:0035023,"GO:0035023","regulation of Rho protein signal transduction","8/473","113/11852",0.0821963086571284,0.0821963086571284,0.927453163534563,"KANK2/VAV3/SOS2/F2R/ARHGEF37/ARHGEF40/NRP1/MCF2L",8
GO:0030516,"GO:0030516","regulation of axon extension","6/473","76/11852",0.0824900946269782,0.0824900946269782,0.927453163534563,"ILK/CDKL5/RUFY3/MAP3K13/NRP1/SEMA3A",6
GO:0033144,"GO:0033144","negative regulation of intracellular steroid hormone receptor signaling pathway","3/473","26/11852",0.0833412342899126,0.0833412342899126,0.927453163534563,"NCOR1/KANK2/ARNTL",3
GO:0043254,"GO:0043254","regulation of protein complex assembly","21/473","381/11852",0.0840391950962938,0.0840391950962938,0.927453163534563,"HDAC6/BIK/STXBP6/HJURP/TPPP/CUL4B/STXBP1/EIF2AK2/CARMIL1/SORL1/ATF7IP/RHOBTB1/GMFB/XPA/MTPN/RALB/ANKRA2/BBS10/GTF2H5/ARF6/CDKN1B",21
GO:0031109,"GO:0031109","microtubule polymerization or depolymerization","7/473","95/11852",0.0850559290582534,0.0850559290582534,0.927453163534563,"HDAC6/GOLGA2/TUBGCP5/TPPP/SKA2/SKA1/CDKN1B",7
GO:0048659,"GO:0048659","smooth muscle cell proliferation","7/473","95/11852",0.0850559290582534,0.0850559290582534,0.927453163534563,"ILK/IRAK4/TGFBR2/MDM2/STAT1/IL18/CDKN1B",7
GO:2000243,"GO:2000243","positive regulation of reproductive process","4/473","42/11852",0.085305548270149,0.085305548270149,0.927453163534563,"CDC25B/CDC25C/PDE5A/SEMA3A",4
GO:0051702,"GO:0051702","interaction with symbiont","5/473","59/11852",0.0856574604214986,0.0856574604214986,0.927453163534563,"EIF2AK4/CALM2/VAPA/SUGT1/CALM1",5
GO:0000086,"GO:0000086","G2/M transition of mitotic cell cycle","14/473","234/11852",0.0857801116768308,0.0857801116768308,0.927453163534563,"PBX1/CDC25B/CDC25C/CCNB2/HMMR/MTA3/TPX2/CIT/ZFYVE19/NEK2/BORA/PSMD5/MELK/CEP57",14
GO:0060560,"GO:0060560","developmental growth involved in morphogenesis","11/473","173/11852",0.0860292641432666,0.0860292641432666,0.927453163534563,"HDAC6/ILK/CDKL5/FLRT3/EIF2AK4/KDM5B/RUFY3/MAP3K13/NRP1/TGFBR2/SEMA3A",11
GO:0071900,"GO:0071900","regulation of protein serine/threonine kinase activity","22/473","404/11852",0.0864921301074743,0.0864921301074743,0.927453163534563,"MADD/ILK/MAP3K3/CDC25C/CCNB2/TSG101/F2R/PIK3CG/PDE5A/IQGAP3/STK38/MAP3K13/TNIK/EIF2AK2/SORL1/PRKAR1A/RALB/CALM2/MDFIC/CDKN2C/CALM1/CDKN1B",22
GO:0034340,"GO:0034340","response to type I interferon","6/473","77/11852",0.0866183370481741,0.0866183370481741,0.927453163534563,"MAVS/STAT2/SAMHD1/STAT1/IFNAR1/TRIM6",6
GO:0042303,"GO:0042303","molting cycle","6/473","77/11852",0.0866183370481741,0.0866183370481741,0.927453163534563,"SMAD4/ZDHHC21/EDAR/LGR4/ARNTL/ZMPSTE24",6
GO:0042633,"GO:0042633","hair cycle","6/473","77/11852",0.0866183370481741,0.0866183370481741,0.927453163534563,"SMAD4/ZDHHC21/EDAR/LGR4/ARNTL/ZMPSTE24",6
GO:0019216,"GO:0019216","regulation of lipid metabolic process","17/473","298/11852",0.0884877651935013,0.0884877651935013,0.927453163534563,"NCOR1/ACOX1/SOCS6/VAV3/PDK4/TTC39B/PIK3CG/SORBS1/LACTB/SORL1/LDLR/PTK2/ME1/PPP2R5A/PDP1/CREBL2/ZMPSTE24",17
GO:0060402,"GO:0060402","calcium ion transport into cytosol","7/473","96/11852",0.0887772158110583,0.0887772158110583,0.927453163534563,"FKBP1A/PLCH1/F2R/FYN/TMEM38B/CALM2/CALM1",7
GO:0006323,"GO:0006323","DNA packaging","8/473","115/11852",0.0888706495126942,0.0888706495126942,0.927453163534563,"SMC4/HJURP/KAT6B/CENPW/NCAPG/ASF1A/CENPK/CENPI",8
GO:0006893,"GO:0006893","Golgi to plasma membrane transport","5/473","60/11852",0.0905513331299409,0.0905513331299409,0.927453163534563,"STXBP6/GOLPH3L/EXOC6B/BBS2/RAB10",5
GO:0071902,"GO:0071902","positive regulation of protein serine/threonine kinase activity","15/473","257/11852",0.0907874197797336,0.0907874197797336,0.927453163534563,"MADD/ILK/MAP3K3/F2R/PIK3CG/PDE5A/IQGAP3/MAP3K13/TNIK/EIF2AK2/RALB/CALM2/MDFIC/CALM1/CDKN1B",15
GO:0051186,"GO:0051186","cofactor metabolic process","25/473","472/11852",0.0908482557997144,0.0908482557997144,0.927453163534563,"ACOT13/NCOR1/HDAC6/ABCD4/ACSS2/PDK4/TPK1/PGM2L1/CBR3/FYN/MOCS2/COQ5/DCAKD/COQ10B/MMADHC/ME1/PDP1/MTHFD2L/NUDT12/GGH/MAT2B/NUBPL/CALM1/GLRX2/PPCS",25
GO:0045814,"GO:0045814","negative regulation of gene expression, epigenetic","6/473","78/11852",0.0908581656964568,0.0908581656964568,0.927453163534563,"CHRAC1/MBD2/JARID2/ATF7IP/ASF1A/BMI1",6
GO:0051209,"GO:0051209","release of sequestered calcium ion into cytosol","6/473","78/11852",0.0908581656964568,0.0908581656964568,0.927453163534563,"FKBP1A/PLCH1/F2R/TMEM38B/CALM2/CALM1",6
GO:0033002,"GO:0033002","muscle cell proliferation","9/473","135/11852",0.0908589703966774,0.0908589703966774,0.927453163534563,"ILK/IRAK4/JARID2/TGFBR2/MDM2/STAT1/PRKAR1A/IL18/CDKN1B",9
GO:0006515,"GO:0006515","protein quality control for misfolded or incompletely synthesized proteins","3/473","27/11852",0.091106593793973,0.091106593793973,0.927453163534563,"HDAC6/OMA1/ATXN3",3
GO:0032890,"GO:0032890","regulation of organic acid transport","3/473","27/11852",0.091106593793973,0.091106593793973,0.927453163534563,"NCOR1/STXBP1/ARL6IP5",3
GO:0046621,"GO:0046621","negative regulation of organ growth","3/473","27/11852",0.091106593793973,0.091106593793973,0.927453163534563,"JARID2/TGFBR2/PTK2",3
GO:0090162,"GO:0090162","establishment of epithelial cell polarity","3/473","27/11852",0.091106593793973,0.091106593793973,0.927453163534563,"MYO18A/FRMD4B/ARF6",3
GO:0090169,"GO:0090169","regulation of spindle assembly","3/473","27/11852",0.091106593793973,0.091106593793973,0.927453163534563,"GPSM2/SPAG5/CHMP1B",3
GO:0035065,"GO:0035065","regulation of histone acetylation","4/473","43/11852",0.0912443406057057,0.0912443406057057,0.927453163534563,"SMAD4/SDR16C5/EID1/ZMPSTE24",4
GO:0099173,"GO:0099173","postsynapse organization","8/473","116/11852",0.0923224922030415,0.0923224922030415,0.927453163534563,"HDAC6/CDKL5/ZMYND8/ABHD17C/FYN/DLG3/NRP1/ARF6",8
GO:0019935,"GO:0019935","cyclic-nucleotide-mediated signaling","7/473","97/11852",0.0925892450671922,0.0925892450671922,0.927453163534563,"ADCY7/GNAQ/PRKAR1A/LGR4/CALM2/CALM1/GNAI1",7
GO:0035601,"GO:0035601","protein deacylation","7/473","97/11852",0.0925892450671922,0.0925892450671922,0.927453163534563,"HDAC6/HDAC11/ABHD17C/SDR16C5/MTA3/SAP30/LYPLAL1",7
GO:0000097,"GO:0000097","sulfur amino acid biosynthetic process","2/473","13/11852",0.0927393110991222,0.0927393110991222,0.927453163534563,"MTHFD2L/ADI1",2
GO:0009109,"GO:0009109","coenzyme catabolic process","2/473","13/11852",0.0927393110991222,0.0927393110991222,0.927453163534563,"CBR3/NUDT12",2
GO:0019471,"GO:0019471","4-hydroxyproline metabolic process","2/473","13/11852",0.0927393110991222,0.0927393110991222,0.927453163534563,"P4HA2/P4HA1",2
GO:0034982,"GO:0034982","mitochondrial protein processing","2/473","13/11852",0.0927393110991222,0.0927393110991222,0.927453163534563,"OMA1/ATP23",2
GO:0036445,"GO:0036445","neuronal stem cell division","2/473","13/11852",0.0927393110991222,0.0927393110991222,0.927453163534563,"ASPM/RAB10",2
GO:0042762,"GO:0042762","regulation of sulfur metabolic process","2/473","13/11852",0.0927393110991222,0.0927393110991222,0.927453163534563,"PDK4/PDP1",2
GO:0044827,"GO:0044827","modulation by host of viral genome replication","2/473","13/11852",0.0927393110991222,0.0927393110991222,0.927453163534563,"EIF2AK4/VAPA",2
GO:0051195,"GO:0051195","negative regulation of cofactor metabolic process","2/473","13/11852",0.0927393110991222,0.0927393110991222,0.927453163534563,"HDAC6/FYN",2
GO:0051315,"GO:0051315","attachment of mitotic spindle microtubules to kinetochore","2/473","13/11852",0.0927393110991222,0.0927393110991222,0.927453163534563,"NUF2/NDC80",2
GO:0051775,"GO:0051775","response to redox state","2/473","13/11852",0.0927393110991222,0.0927393110991222,0.927453163534563,"ARNTL/GLRX2",2
GO:0051955,"GO:0051955","regulation of amino acid transport","2/473","13/11852",0.0927393110991222,0.0927393110991222,0.927453163534563,"STXBP1/ARL6IP5",2
GO:0055057,"GO:0055057","neuroblast division","2/473","13/11852",0.0927393110991222,0.0927393110991222,0.927453163534563,"ASPM/RAB10",2
GO:0060294,"GO:0060294","cilium movement involved in cell motility","2/473","13/11852",0.0927393110991222,0.0927393110991222,0.927453163534563,"GAS8/BBS2",2
GO:0061298,"GO:0061298","retina vasculature development in camera-type eye","2/473","13/11852",0.0927393110991222,0.0927393110991222,0.927453163534563,"NRP1/CYP1B1",2
GO:0070193,"GO:0070193","synaptonemal complex organization","2/473","13/11852",0.0927393110991222,0.0927393110991222,0.927453163534563,"AGO4/MLH3",2
GO:0070875,"GO:0070875","positive regulation of glycogen metabolic process","2/473","13/11852",0.0927393110991222,0.0927393110991222,0.927453163534563,"SORBS1/EPM2AIP1",2
GO:0071360,"GO:0071360","cellular response to exogenous dsRNA","2/473","13/11852",0.0927393110991222,0.0927393110991222,0.927453163534563,"MAVS/RALB",2
GO:0072425,"GO:0072425","signal transduction involved in G2 DNA damage checkpoint","2/473","13/11852",0.0927393110991222,0.0927393110991222,0.927453163534563,"ABRAXAS1/CDC14B",2
GO:0099558,"GO:0099558","maintenance of synapse structure","2/473","13/11852",0.0927393110991222,0.0927393110991222,0.927453163534563,"DLG3/ARF6",2
GO:1903541,"GO:1903541","regulation of exosomal secretion","2/473","13/11852",0.0927393110991222,0.0927393110991222,0.927453163534563,"TSG101/PDCD6IP",2
GO:1903543,"GO:1903543","positive regulation of exosomal secretion","2/473","13/11852",0.0927393110991222,0.0927393110991222,0.927453163534563,"TSG101/PDCD6IP",2
GO:1901990,"GO:1901990","regulation of mitotic cell cycle phase transition","21/473","386/11852",0.093019339695539,0.093019339695539,0.927453163534563,"PBX1/KANK2/CDC25B/CDC25C/HMMR/MTA3/TPX2/CUL4B/CDC14B/ZFYVE19/MDM2/NEK2/UBE2D1/SOX4/TTK/BUB1/PSMD5/NDC80/CDKN2C/CEP57/CDKN1B",21
GO:0051961,"GO:0051961","negative regulation of nervous system development","13/473","217/11852",0.094551229769517,0.094551229769517,0.927453163534563,"PBX1/EIF2AK4/ASPM/RUFY3/HOOK3/SORL1/NRP1/LDLR/PTK2/MDM2/DIXDC1/ARF6/SEMA3A",13
GO:1903829,"GO:1903829","positive regulation of cellular protein localization","16/473","280/11852",0.0952041594944247,0.0952041594944247,0.927453163534563,"EPB41/GPSM2/ABHD17C/TSG101/SORBS1/RUFY3/FYN/CASP8/MAVS/GAS8/SORL1/MDM2/NDC80/RHOU/GNAI1/ARF6",16
GO:0048661,"GO:0048661","positive regulation of smooth muscle cell proliferation","5/473","61/11852",0.0955866671230598,0.0955866671230598,0.927453163534563,"IRAK4/TGFBR2/MDM2/STAT1/IL18",5
GO:0098732,"GO:0098732","macromolecule deacylation","7/473","98/11852",0.0964915338593659,0.0964915338593659,0.927453163534563,"HDAC6/HDAC11/ABHD17C/SDR16C5/MTA3/SAP30/LYPLAL1",7
GO:0001658,"GO:0001658","branching involved in ureteric bud morphogenesis","4/473","44/11852",0.097374990784942,0.097374990784942,0.927453163534563,"ILK/PBX1/SMAD4/LGR4",4
GO:0003170,"GO:0003170","heart valve development","4/473","44/11852",0.097374990784942,0.097374990784942,0.927453163534563,"SMAD4/TGFBR2/MDM2/SOX4",4
GO:0030865,"GO:0030865","cortical cytoskeleton organization","4/473","44/11852",0.097374990784942,0.097374990784942,0.927453163534563,"EPB41/PDCD6IP/CIT/ARF6",4
GO:0031050,"GO:0031050","dsRNA processing","4/473","44/11852",0.097374990784942,0.097374990784942,0.927453163534563,"NCOR1/AGO4/HENMT1/ZMPSTE24",4
GO:0070918,"GO:0070918","production of small RNA involved in gene silencing by RNA","4/473","44/11852",0.097374990784942,0.097374990784942,0.927453163534563,"NCOR1/AGO4/HENMT1/ZMPSTE24",4
GO:1990928,"GO:1990928","response to amino acid starvation","4/473","44/11852",0.097374990784942,0.097374990784942,0.927453163534563,"EIF2AK4/SLC38A2/EIF2AK2/RRAGA",4
GO:0090068,"GO:0090068","positive regulation of cell cycle process","14/473","239/11852",0.0976213836540156,0.0976213836540156,0.927453163534563,"PBX1/USP19/CDC25B/GPSM2/CDC25C/SPAG5/MTA3/CUL4B/CDC14B/CIT/MDM2/SOX4/NDC80/CDKN1B",14
GO:0006294,"GO:0006294","nucleotide-excision repair, preincision complex assembly","3/473","28/11852",0.0991598462034522,0.0991598462034522,0.927453163534563,"CUL4B/XPA/GTF2H5",3
GO:0032467,"GO:0032467","positive regulation of cytokinesis","3/473","28/11852",0.0991598462034522,0.0991598462034522,0.927453163534563,"CDC25B/CDC14B/CIT",3
GO:0055026,"GO:0055026","negative regulation of cardiac muscle tissue development","3/473","28/11852",0.0991598462034522,0.0991598462034522,0.927453163534563,"SMAD4/JARID2/TGFBR2",3
GO:0051283,"GO:0051283","negative regulation of sequestering of calcium ion","6/473","80/11852",0.0996689726563484,0.0996689726563484,0.927453163534563,"FKBP1A/PLCH1/F2R/TMEM38B/CALM2/CALM1",6
GO:0048232,"GO:0048232","male gamete generation","18/473","325/11852",0.100399578965119,0.100399578965119,0.927453163534563,"SMAD4/ACOX1/HERPUD2/AGO4/CDC25C/KATNAL1/ASPM/SMARCA2/ABHD2/MLH3/PAFAH1B2/LGR4/ICA1L/BBS2/SPA17/ARNTL/CEP57/MORN2",18
GO:1901987,"GO:1901987","regulation of cell cycle phase transition","22/473","412/11852",0.100985631499809,0.100985631499809,0.927453163534563,"PBX1/KANK2/CDC25B/CDC25C/ABRAXAS1/HMMR/MTA3/TPX2/CUL4B/CDC14B/ZFYVE19/MDM2/NEK2/UBE2D1/SOX4/TTK/BUB1/PSMD5/NDC80/CDKN2C/CEP57/CDKN1B",22
GO:0032872,"GO:0032872","regulation of stress-activated MAPK cascade","11/473","179/11852",0.102996650286185,0.102996650286185,0.927453163534563,"NCOR1/MAP3K3/NBR1/MAP3K13/TNIK/EIF2AK2/EDAR/ARL6IP5/MDFIC/SEMA3A/PBK",11
GO:0022600,"GO:0022600","digestive system process","4/473","45/11852",0.10369290560256,0.10369290560256,0.927453163534563,"TJP2/EPB41/LDLR/SNX10",4
GO:0051783,"GO:0051783","regulation of nuclear division","10/473","159/11852",0.103928555659969,0.103928555659969,0.927453163534563,"CDC25C/CDC14B/NEK2/PRKAR1A/BORA/TTK/BUB1/NDC80/CDKN1B/CHMP1B",10
GO:0031497,"GO:0031497","chromatin assembly","6/473","81/11852",0.10423785162747,0.10423785162747,0.927453163534563,"HJURP/KAT6B/CENPW/ASF1A/CENPK/CENPI",6
GO:0051282,"GO:0051282","regulation of sequestering of calcium ion","6/473","81/11852",0.10423785162747,0.10423785162747,0.927453163534563,"FKBP1A/PLCH1/F2R/TMEM38B/CALM2/CALM1",6
GO:1902749,"GO:1902749","regulation of cell cycle G2/M phase transition","12/473","200/11852",0.104348376463642,0.104348376463642,0.927453163534563,"PBX1/CDC25B/CDC25C/ABRAXAS1/HMMR/MTA3/TPX2/CDC14B/ZFYVE19/NEK2/PSMD5/CEP57",12
GO:0001516,"GO:0001516","prostaglandin biosynthetic process","2/473","14/11852",0.105437115362617,0.105437115362617,0.927453163534563,"CBR1/PNPLA8",2
GO:0001573,"GO:0001573","ganglioside metabolic process","2/473","14/11852",0.105437115362617,0.105437115362617,0.927453163534563,"GM2A/B3GALT4",2
GO:0002021,"GO:0002021","response to dietary excess","2/473","14/11852",0.105437115362617,0.105437115362617,0.927453163534563,"SORL1/OMA1",2
GO:0003198,"GO:0003198","epithelial to mesenchymal transition involved in endocardial cushion formation","2/473","14/11852",0.105437115362617,0.105437115362617,0.927453163534563,"SMAD4/TGFBR2",2
GO:0010310,"GO:0010310","regulation of hydrogen peroxide metabolic process","2/473","14/11852",0.105437115362617,0.105437115362617,0.927453163534563,"HDAC6/FYN",2
GO:0010457,"GO:0010457","centriole-centriole cohesion","2/473","14/11852",0.105437115362617,0.105437115362617,0.927453163534563,"CEP68/NEK2",2
GO:0017000,"GO:0017000","antibiotic biosynthetic process","2/473","14/11852",0.105437115362617,0.105437115362617,0.927453163534563,"ACSS2/FYN",2
GO:0019081,"GO:0019081","viral translation","2/473","14/11852",0.105437115362617,0.105437115362617,0.927453163534563,"EIF2AK4/MCTS1",2
GO:0035020,"GO:0035020","regulation of Rac protein signal transduction","2/473","14/11852",0.105437115362617,0.105437115362617,0.927453163534563,"CADM4/ARF6",2
GO:0035162,"GO:0035162","embryonic hemopoiesis","2/473","14/11852",0.105437115362617,0.105437115362617,0.927453163534563,"PBX1/TGFBR2",2
GO:0043558,"GO:0043558","regulation of translational initiation in response to stress","2/473","14/11852",0.105437115362617,0.105437115362617,0.927453163534563,"EIF2AK4/EIF2AK2",2
GO:0046457,"GO:0046457","prostanoid biosynthetic process","2/473","14/11852",0.105437115362617,0.105437115362617,0.927453163534563,"CBR1/PNPLA8",2
GO:0060965,"GO:0060965","negative regulation of gene silencing by miRNA","2/473","14/11852",0.105437115362617,0.105437115362617,0.927453163534563,"NCOR1/ZMPSTE24",2
GO:0071377,"GO:0071377","cellular response to glucagon stimulus","2/473","14/11852",0.105437115362617,0.105437115362617,0.927453163534563,"ADCY7/PRKAR1A",2
GO:0014812,"GO:0014812","muscle cell migration","5/473","63/11852",0.106073585165708,0.106073585165708,0.927453163534563,"ILK/PLAT/SORL1/NRP1/MDM2",5
GO:0033866,"GO:0033866","nucleoside bisphosphate biosynthetic process","5/473","63/11852",0.106073585165708,0.106073585165708,0.927453163534563,"ACSS2/PDK4/DCAKD/PDP1/PPCS",5
GO:0034030,"GO:0034030","ribonucleoside bisphosphate biosynthetic process","5/473","63/11852",0.106073585165708,0.106073585165708,0.927453163534563,"ACSS2/PDK4/DCAKD/PDP1/PPCS",5
GO:0034033,"GO:0034033","purine nucleoside bisphosphate biosynthetic process","5/473","63/11852",0.106073585165708,0.106073585165708,0.927453163534563,"ACSS2/PDK4/DCAKD/PDP1/PPCS",5
GO:0043502,"GO:0043502","regulation of muscle adaptation","5/473","63/11852",0.106073585165708,0.106073585165708,0.927453163534563,"SMAD4/PDE5A/JARID2/PTK2/MTPN",5
GO:1903900,"GO:1903900","regulation of viral life cycle","8/473","120/11852",0.106887734193731,0.106887734193731,0.927453163534563,"EIF2AK4/TRIM5/TSG101/MAVS/EIF2AK2/KPNA2/TRIM6/VAPA",8
GO:0010524,"GO:0010524","positive regulation of calcium ion transport into cytosol","3/473","29/11852",0.107487841350228,0.107487841350228,0.927453163534563,"F2R/CALM2/CALM1",3
GO:0051443,"GO:0051443","positive regulation of ubiquitin-protein transferase activity","3/473","29/11852",0.107487841350228,0.107487841350228,0.927453163534563,"GOLGA2/CDC14B/BMI1",3
GO:1901661,"GO:1901661","quinone metabolic process","3/473","29/11852",0.107487841350228,0.107487841350228,0.927453163534563,"CBR3/COQ5/COQ10B",3
GO:0016482,"GO:0016482","cytosolic transport","9/473","140/11852",0.107565103337463,0.107565103337463,0.927453163534563,"ERC1/WIPI1/AKTIP/RAB6A/TBC1D5/HOOK3/SORL1/RAB6B/RHOBTB3",9
GO:0001764,"GO:0001764","neuron migration","7/473","101/11852",0.108733940300326,0.108733940300326,0.927453163534563,"APBB2/CDKL5/ASPM/FYN/NRP1/PTK2/SEMA3A",7
GO:0006890,"GO:0006890","retrograde vesicle-mediated transport, Golgi to ER","6/473","82/11852",0.10891412475976,0.10891412475976,0.927453163534563,"RAB6A/GOLPH3L/KIF3C/RAB6B/TMED7/KIFAP3",6
GO:0019933,"GO:0019933","cAMP-mediated signaling","6/473","82/11852",0.10891412475976,0.10891412475976,0.927453163534563,"ADCY7/GNAQ/LGR4/CALM2/CALM1/GNAI1",6
GO:0032092,"GO:0032092","positive regulation of protein binding","6/473","82/11852",0.10891412475976,0.10891412475976,0.927453163534563,"FKBP1A/EPB41/AKTIP/NRP1/RALB/ARF6",6
GO:0061640,"GO:0061640","cytoskeleton-dependent cytokinesis","6/473","82/11852",0.10891412475976,0.10891412475976,0.927453163534563,"STAMBP/CEP55/PDCD6IP/CIT/SNX18/CHMP1B",6
GO:0003208,"GO:0003208","cardiac ventricle morphogenesis","4/473","46/11852",0.110193212763157,0.110193212763157,0.927453163534563,"FKBP1A/SMAD4/TGFBR2/SOX4",4
GO:0014910,"GO:0014910","regulation of smooth muscle cell migration","4/473","46/11852",0.110193212763157,0.110193212763157,0.927453163534563,"ILK/SORL1/NRP1/MDM2",4
GO:0043550,"GO:0043550","regulation of lipid kinase activity","4/473","46/11852",0.110193212763157,0.110193212763157,0.927453163534563,"SOCS6/VAV3/PTK2/PPP2R5A",4
GO:1990138,"GO:1990138","neuron projection extension","8/473","121/11852",0.110716536183267,0.110716536183267,0.927453163534563,"ILK/CDKL5/FLRT3/EIF2AK4/RUFY3/MAP3K13/NRP1/SEMA3A",8
GO:0008016,"GO:0008016","regulation of heart contraction","9/473","141/11852",0.111101065534049,0.111101065534049,0.927453163534563,"PIK3CG/PDE5A/DSC2/MDM2/TMEM38B/CALM2/CALM1/ZMPSTE24/SEMA3A",9
GO:0001942,"GO:0001942","hair follicle development","5/473","64/11852",0.111520662381645,0.111520662381645,0.927453163534563,"SMAD4/ZDHHC21/EDAR/LGR4/ZMPSTE24",5
GO:0006937,"GO:0006937","regulation of muscle contraction","7/473","102/11852",0.112990864523312,0.112990864523312,0.927453163534563,"F2R/PIK3CG/PDE5A/DSC2/TMEM38B/CALM2/CALM1",7
GO:0031098,"GO:0031098","stress-activated protein kinase signaling cascade","14/473","245/11852",0.113098485483696,0.113098485483696,0.927453163534563,"NCOR1/MAP3K3/NEK1/NBR1/IRAK4/MAP3K13/TNIK/EIF2AK2/EDAR/ARL6IP5/MDFIC/ZMPSTE24/SEMA3A/PBK",14
GO:1901988,"GO:1901988","negative regulation of cell cycle phase transition","13/473","224/11852",0.113323593771808,0.113323593771808,0.927453163534563,"KANK2/CDC25C/ABRAXAS1/CDC14B/ZFYVE19/MDM2/SOX4/TTK/BUB1/PSMD5/NDC80/CDKN2C/CDKN1B",13
GO:0065004,"GO:0065004","protein-DNA complex assembly","10/473","162/11852",0.113772490275333,0.113772490275333,0.927453163534563,"HJURP/CUL4B/KAT6B/ATF7IP/CENPW/XPA/ASF1A/CENPK/CENPI/GTF2H5",10
GO:0051092,"GO:0051092","positive regulation of NF-kappaB transcription factor activity","8/473","122/11852",0.114619352733888,0.114619352733888,0.927453163534563,"ERC1/TRIM5/IRAK4/MAP3K13/EIF2AK2/MTPN/IL18/RTKN2",8
GO:0006891,"GO:0006891","intra-Golgi vesicle-mediated transport","3/473","30/11852",0.116077138853021,0.116077138853021,0.927453163534563,"RAB6A/RAB6B/GABARAPL2",3
GO:0007435,"GO:0007435","salivary gland morphogenesis","3/473","30/11852",0.116077138853021,0.116077138853021,0.927453163534563,"NRP1/EDAR/SEMA3A",3
GO:0032459,"GO:0032459","regulation of protein oligomerization","3/473","30/11852",0.116077138853021,0.116077138853021,0.927453163534563,"HDAC6/BIK/SORL1",3
GO:0032757,"GO:0032757","positive regulation of interleukin-8 production","3/473","30/11852",0.116077138853021,0.116077138853021,0.927453163534563,"F2R/MAVS/CD58",3
GO:0036258,"GO:0036258","multivesicular body assembly","3/473","30/11852",0.116077138853021,0.116077138853021,0.927453163534563,"TSG101/PDCD6IP/CHMP1B",3
GO:0060338,"GO:0060338","regulation of type I interferon-mediated signaling pathway","3/473","30/11852",0.116077138853021,0.116077138853021,0.927453163534563,"MAVS/SAMHD1/TRIM6",3
GO:2000242,"GO:2000242","negative regulation of reproductive process","3/473","30/11852",0.116077138853021,0.116077138853021,0.927453163534563,"PRKAR1A/TTK/CDKN1B",3
GO:0018208,"GO:0018208","peptidyl-proline modification","4/473","47/11852",0.116870785429924,0.116870785429924,0.927453163534563,"FKBP1A/P4HA2/PPIC/P4HA1",4
GO:0003300,"GO:0003300","cardiac muscle hypertrophy","5/473","65/11852",0.117100204432038,0.117100204432038,0.927453163534563,"SMAD4/PDE5A/JARID2/PTK2/MTPN",5
GO:0014897,"GO:0014897","striated muscle hypertrophy","5/473","65/11852",0.117100204432038,0.117100204432038,0.927453163534563,"SMAD4/PDE5A/JARID2/PTK2/MTPN",5
GO:0051924,"GO:0051924","regulation of calcium ion transport","9/473","143/11852",0.118365083215943,0.118365083215943,0.927453163534563,"FKBP1A/EPB41/THADA/F2R/PIK3CG/FYN/TMEM38B/CALM2/CALM1",9
GO:0006086,"GO:0006086","acetyl-CoA biosynthetic process from pyruvate","2/473","15/11852",0.118567602417889,0.118567602417889,0.927453163534563,"PDK4/PDP1",2
GO:0009235,"GO:0009235","cobalamin metabolic process","2/473","15/11852",0.118567602417889,0.118567602417889,0.927453163534563,"ABCD4/MMADHC",2
GO:0010226,"GO:0010226","response to lithium ion","2/473","15/11852",0.118567602417889,0.118567602417889,0.927453163534563,"ADCY7/CDKN1B",2
GO:0015936,"GO:0015936","coenzyme A metabolic process","2/473","15/11852",0.118567602417889,0.118567602417889,0.927453163534563,"DCAKD/PPCS",2
GO:0032104,"GO:0032104","regulation of response to extracellular stimulus","2/473","15/11852",0.118567602417889,0.118567602417889,0.927453163534563,"KANK2/BBS2",2
GO:0032107,"GO:0032107","regulation of response to nutrient levels","2/473","15/11852",0.118567602417889,0.118567602417889,0.927453163534563,"KANK2/BBS2",2
GO:0032516,"GO:0032516","positive regulation of phosphoprotein phosphatase activity","2/473","15/11852",0.118567602417889,0.118567602417889,0.927453163534563,"CALM2/CALM1",2
GO:0032988,"GO:0032988","ribonucleoprotein complex disassembly","2/473","15/11852",0.118567602417889,0.118567602417889,0.927453163534563,"MTIF3/MCTS1",2
GO:0033540,"GO:0033540","fatty acid beta-oxidation using acyl-CoA oxidase","2/473","15/11852",0.118567602417889,0.118567602417889,0.927453163534563,"ACOX1/EHHADH",2
GO:0033599,"GO:0033599","regulation of mammary gland epithelial cell proliferation","2/473","15/11852",0.118567602417889,0.118567602417889,0.927453163534563,"KDM5B/IQGAP3",2
GO:0050995,"GO:0050995","negative regulation of lipid catabolic process","2/473","15/11852",0.118567602417889,0.118567602417889,0.927453163534563,"PIK3CG/SORL1",2
GO:0051446,"GO:0051446","positive regulation of meiotic cell cycle","2/473","15/11852",0.118567602417889,0.118567602417889,0.927453163534563,"CDC25B/CDC25C",2
GO:0051589,"GO:0051589","negative regulation of neurotransmitter transport","2/473","15/11852",0.118567602417889,0.118567602417889,0.927453163534563,"RAP1B/ARL6IP5",2
GO:0051782,"GO:0051782","negative regulation of cell division","2/473","15/11852",0.118567602417889,0.118567602417889,0.927453163534563,"ASPM/ZFYVE19",2
GO:0060065,"GO:0060065","uterus development","2/473","15/11852",0.118567602417889,0.118567602417889,0.927453163534563,"SMAD4/KDM5B",2
GO:0060384,"GO:0060384","innervation","2/473","15/11852",0.118567602417889,0.118567602417889,0.927453163534563,"NRP1/SEMA3A",2
GO:0071850,"GO:0071850","mitotic cell cycle arrest","2/473","15/11852",0.118567602417889,0.118567602417889,0.927453163534563,"CDC14B/CDKN1B",2
GO:0072202,"GO:0072202","cell differentiation involved in metanephros development","2/473","15/11852",0.118567602417889,0.118567602417889,0.927453163534563,"STAT1/LGR4",2
GO:0072273,"GO:0072273","metanephric nephron morphogenesis","2/473","15/11852",0.118567602417889,0.118567602417889,0.927453163534563,"STAT1/LGR4",2
GO:0086064,"GO:0086064","cell communication by electrical coupling involved in cardiac conduction","2/473","15/11852",0.118567602417889,0.118567602417889,0.927453163534563,"CALM2/CALM1",2
GO:1902188,"GO:1902188","positive regulation of viral release from host cell","2/473","15/11852",0.118567602417889,0.118567602417889,0.927453163534563,"TSG101/VAPA",2
GO:1904294,"GO:1904294","positive regulation of ERAD pathway","2/473","15/11852",0.118567602417889,0.118567602417889,0.927453163534563,"RNFT1/ATXN3",2
GO:1904467,"GO:1904467","regulation of tumor necrosis factor secretion","2/473","15/11852",0.118567602417889,0.118567602417889,0.927453163534563,"FRMD8/MAVS",2
GO:2000482,"GO:2000482","regulation of interleukin-8 secretion","2/473","15/11852",0.118567602417889,0.118567602417889,0.927453163534563,"F2R/CD58",2
GO:2000778,"GO:2000778","positive regulation of interleukin-6 secretion","2/473","15/11852",0.118567602417889,0.118567602417889,0.927453163534563,"F2R/MAVS",2
GO:2000811,"GO:2000811","negative regulation of anoikis","2/473","15/11852",0.118567602417889,0.118567602417889,0.927453163534563,"PDK4/PTK2",2
GO:0051208,"GO:0051208","sequestering of calcium ion","6/473","84/11852",0.118583430650858,0.118583430650858,0.927453163534563,"FKBP1A/PLCH1/F2R/TMEM38B/CALM2/CALM1",6
GO:0007050,"GO:0007050","cell cycle arrest","12/473","205/11852",0.11910230925211,0.11910230925211,0.927453163534563,"APBB2/ILK/EIF2AK4/CDC25C/TSG101/CDC14B/RRAGA/MDM2/SOX4/HBP1/CDKN2C/CDKN1B",12
GO:0051188,"GO:0051188","cofactor biosynthetic process","15/473","269/11852",0.120373187390657,0.120373187390657,0.927453163534563,"NCOR1/ACSS2/PDK4/TPK1/PGM2L1/FYN/MOCS2/COQ5/DCAKD/COQ10B/MMADHC/PDP1/NUDT12/MAT2B/PPCS",15
GO:0009755,"GO:0009755","hormone-mediated signaling pathway","10/473","164/11852",0.120617371183615,0.120617371183615,0.927453163534563,"NCOR1/HDAC6/KANK2/NCOA3/PGRMC2/ABHD2/CALCOCO1/LGR4/UBA5/ARNTL",10
GO:0045665,"GO:0045665","negative regulation of neuron differentiation","10/473","164/11852",0.120617371183615,0.120617371183615,0.927453163534563,"PBX1/EIF2AK4/ASPM/RUFY3/NRP1/PTK2/MDM2/DIXDC1/ARF6/SEMA3A",10
GO:0006342,"GO:0006342","chromatin silencing","5/473","66/11852",0.122809556872898,0.122809556872898,0.927453163534563,"CHRAC1/MBD2/ATF7IP/ASF1A/BMI1",5
GO:0014896,"GO:0014896","muscle hypertrophy","5/473","66/11852",0.122809556872898,0.122809556872898,0.927453163534563,"SMAD4/PDE5A/JARID2/PTK2/MTPN",5
GO:0022404,"GO:0022404","molting cycle process","5/473","66/11852",0.122809556872898,0.122809556872898,0.927453163534563,"SMAD4/ZDHHC21/EDAR/LGR4/ZMPSTE24",5
GO:0022405,"GO:0022405","hair cycle process","5/473","66/11852",0.122809556872898,0.122809556872898,0.927453163534563,"SMAD4/ZDHHC21/EDAR/LGR4/ZMPSTE24",5
GO:0033143,"GO:0033143","regulation of intracellular steroid hormone receptor signaling pathway","5/473","66/11852",0.122809556872898,0.122809556872898,0.927453163534563,"NCOR1/HDAC6/KANK2/UBA5/ARNTL",5
GO:0050772,"GO:0050772","positive regulation of axonogenesis","5/473","66/11852",0.122809556872898,0.122809556872898,0.927453163534563,"ILK/CDKL5/RUFY3/MAP3K13/NRP1",5
GO:0098773,"GO:0098773","skin epidermis development","5/473","66/11852",0.122809556872898,0.122809556872898,0.927453163534563,"SMAD4/ZDHHC21/EDAR/LGR4/ZMPSTE24",5
GO:0003206,"GO:0003206","cardiac chamber morphogenesis","6/473","85/11852",0.123573492187351,0.123573492187351,0.927453163534563,"FKBP1A/SMAD4/NRP1/TGFBR2/MDM2/SOX4",6
GO:0098876,"GO:0098876","vesicle-mediated transport to the plasma membrane","6/473","85/11852",0.123573492187351,0.123573492187351,0.927453163534563,"STXBP6/VPS39/GOLPH3L/EXOC6B/BBS2/RAB10",6
GO:0006879,"GO:0006879","cellular iron ion homeostasis","4/473","48/11852",0.123720266189757,0.123720266189757,0.927453163534563,"SMAD4/FBXL5/ATP6V1A/NDFIP1",4
GO:0032410,"GO:0032410","negative regulation of transporter activity","4/473","48/11852",0.123720266189757,0.123720266189757,0.927453163534563,"THADA/NDFIP1/CALM2/CALM1",4
GO:0060675,"GO:0060675","ureteric bud morphogenesis","4/473","48/11852",0.123720266189757,0.123720266189757,0.927453163534563,"ILK/PBX1/SMAD4/LGR4",4
GO:0003197,"GO:0003197","endocardial cushion development","3/473","31/11852",0.124914086787716,0.124914086787716,0.927453163534563,"SMAD4/TGFBR2/MDM2",3
GO:0017145,"GO:0017145","stem cell division","3/473","31/11852",0.124914086787716,0.124914086787716,0.927453163534563,"ASPM/NCOA3/RAB10",3
GO:0036257,"GO:0036257","multivesicular body organization","3/473","31/11852",0.124914086787716,0.124914086787716,0.927453163534563,"TSG101/PDCD6IP/CHMP1B",3
GO:0051926,"GO:0051926","negative regulation of calcium ion transport","3/473","31/11852",0.124914086787716,0.124914086787716,0.927453163534563,"THADA/CALM2/CALM1",3
GO:1902186,"GO:1902186","regulation of viral release from host cell","3/473","31/11852",0.124914086787716,0.124914086787716,0.927453163534563,"TRIM5/TSG101/VAPA",3
GO:0007276,"GO:0007276","gamete generation","22/473","424/11852",0.125486943961893,0.125486943961893,0.927453163534563,"SMAD4/ACOX1/CDC25B/HERPUD2/AGO4/CDC25C/KATNAL1/ASPM/PDE5A/SMARCA2/ABHD2/MLH3/PRKAR1A/PAFAH1B2/LGR4/ICA1L/BBS2/TTK/SPA17/ARNTL/CEP57/MORN2",22
GO:0007088,"GO:0007088","regulation of mitotic nuclear division","9/473","145/11852",0.125882358916035,0.125882358916035,0.927453163534563,"CDC25C/CDC14B/NEK2/BORA/TTK/BUB1/NDC80/CDKN1B/CHMP1B",9
GO:1903827,"GO:1903827","regulation of cellular protein localization","23/473","447/11852",0.12714613281827,0.12714613281827,0.927453163534563,"ZMYND8/EPB41/GPSM2/ABHD17C/TSG101/SORBS1/RUFY3/FYN/CASP8/MAVS/GAS8/SORL1/MDM2/PPP2R5A/ERLEC1/STX7/TMEM59/RALB/NDC80/MDFIC/RHOU/GNAI1/ARF6",23
GO:0048588,"GO:0048588","developmental cell growth","10/473","166/11852",0.127685137959136,0.127685137959136,0.927453163534563,"HDAC6/ILK/CDKL5/FLRT3/EIF2AK4/RUFY3/MAP3K13/NRP1/TGFBR2/SEMA3A",10
GO:0043434,"GO:0043434","response to peptide hormone","17/473","315/11852",0.127718076827141,0.127718076827141,0.927453163534563,"ADCY7/PDK4/SORBS1/FYN/STAT2/SORL1/PTK2/MDM2/STAT1/PRKAR1A/RAP1B/ATP6V1A/GGH/RAB10/EPM2AIP1/GNAI1/CDKN1B",17
GO:0022412,"GO:0022412","cellular process involved in reproduction in multicellular organism","12/473","208/11852",0.128498851240855,0.128498851240855,0.927453163534563,"CDC25B/AGO4/ASPM/PDE5A/SMARCA2/ABHD2/MLH3/PRKAR1A/ICA1L/BBS2/TTK/CEP57",12
GO:0035384,"GO:0035384","thioester biosynthetic process","4/473","49/11852",0.130736090377056,0.130736090377056,0.927453163534563,"ACSS2/PDK4/PDP1/PPCS",4
GO:0043627,"GO:0043627","response to estrogen","4/473","49/11852",0.130736090377056,0.130736090377056,0.927453163534563,"SERPINB9/TGFBR2/MDM2/SFR1",4
GO:0071616,"GO:0071616","acyl-CoA biosynthetic process","4/473","49/11852",0.130736090377056,0.130736090377056,0.927453163534563,"ACSS2/PDK4/PDP1/PPCS",4
GO:0072171,"GO:0072171","mesonephric tubule morphogenesis","4/473","49/11852",0.130736090377056,0.130736090377056,0.927453163534563,"ILK/PBX1/SMAD4/LGR4",4
GO:0042157,"GO:0042157","lipoprotein metabolic process","7/473","106/11852",0.13087561249366,0.13087561249366,0.927453163534563,"WIPI1/PIGB/ABHD17C/ZDHHC21/PIGM/LDLR/LYPLAL1",7
GO:0043524,"GO:0043524","negative regulation of neuron apoptotic process","7/473","106/11852",0.13087561249366,0.13087561249366,0.927453163534563,"ILK/STAMBP/F2R/FYN/STXBP1/NRP1/RETREG1",7
GO:1902904,"GO:1902904","negative regulation of supramolecular fiber organization","7/473","106/11852",0.13087561249366,0.13087561249366,0.927453163534563,"HDAC6/SMAD4/PHLDB2/CARMIL1/LDLR/GMFB/MTPN",7
GO:0043543,"GO:0043543","protein acylation","12/473","209/11852",0.131720529237484,0.131720529237484,0.927453163534563,"SMAD4/ABHD17C/ZDHHC21/SDR16C5/NCOA3/KAT6B/EHHADH/SOX4/YEATS4/ARNTL/EID1/ZMPSTE24",12
GO:0003283,"GO:0003283","atrial septum development","2/473","16/11852",0.13207619374806,0.13207619374806,0.927453163534563,"MDM2/SOX4",2
GO:0006346,"GO:0006346","methylation-dependent chromatin silencing","2/473","16/11852",0.13207619374806,0.13207619374806,0.927453163534563,"MBD2/ATF7IP",2
GO:0006555,"GO:0006555","methionine metabolic process","2/473","16/11852",0.13207619374806,0.13207619374806,0.927453163534563,"MTHFD2L/ADI1",2
GO:0007076,"GO:0007076","mitotic chromosome condensation","2/473","16/11852",0.13207619374806,0.13207619374806,0.927453163534563,"SMC4/NCAPG",2
GO:0007096,"GO:0007096","regulation of exit from mitosis","2/473","16/11852",0.13207619374806,0.13207619374806,0.927453163534563,"CDC14B/CDKN1B",2
GO:0007190,"GO:0007190","activation of adenylate cyclase activity","2/473","16/11852",0.13207619374806,0.13207619374806,0.927453163534563,"ADCY7/LGR4",2
GO:0007413,"GO:0007413","axonal fasciculation","2/473","16/11852",0.13207619374806,0.13207619374806,0.927453163534563,"NRP1/SEMA3A",2
GO:0007603,"GO:0007603","phototransduction, visible light","2/473","16/11852",0.13207619374806,0.13207619374806,0.927453163534563,"GNAQ/CALM1",2
GO:0010743,"GO:0010743","regulation of macrophage derived foam cell differentiation","2/473","16/11852",0.13207619374806,0.13207619374806,0.927453163534563,"ABCA5/IL18",2
GO:0016082,"GO:0016082","synaptic vesicle priming","2/473","16/11852",0.13207619374806,0.13207619374806,0.927453163534563,"STXBP1/SNAP23",2
GO:0016254,"GO:0016254","preassembly of GPI anchor in ER membrane","2/473","16/11852",0.13207619374806,0.13207619374806,0.927453163534563,"PIGB/PIGM",2
GO:0019433,"GO:0019433","triglyceride catabolic process","2/473","16/11852",0.13207619374806,0.13207619374806,0.927453163534563,"PIK3CG/SORL1",2
GO:0021602,"GO:0021602","cranial nerve morphogenesis","2/473","16/11852",0.13207619374806,0.13207619374806,0.927453163534563,"NRP1/SEMA3A",2
GO:0035455,"GO:0035455","response to interferon-alpha","2/473","16/11852",0.13207619374806,0.13207619374806,0.927453163534563,"EIF2AK2/IFNAR1",2
GO:0044030,"GO:0044030","regulation of DNA methylation","2/473","16/11852",0.13207619374806,0.13207619374806,0.927453163534563,"MBD2/ZMPSTE24",2
GO:0045324,"GO:0045324","late endosome to vacuole transport","2/473","16/11852",0.13207619374806,0.13207619374806,0.927453163534563,"TMEM50B/CHMP1B",2
GO:0051131,"GO:0051131","chaperone-mediated protein complex assembly","2/473","16/11852",0.13207619374806,0.13207619374806,0.927453163534563,"HDAC6/BBS10",2
GO:0051382,"GO:0051382","kinetochore assembly","2/473","16/11852",0.13207619374806,0.13207619374806,0.927453163534563,"CENPW/CENPK",2
GO:0060149,"GO:0060149","negative regulation of posttranscriptional gene silencing","2/473","16/11852",0.13207619374806,0.13207619374806,0.927453163534563,"NCOR1/ZMPSTE24",2
GO:0060967,"GO:0060967","negative regulation of gene silencing by RNA","2/473","16/11852",0.13207619374806,0.13207619374806,0.927453163534563,"NCOR1/ZMPSTE24",2
GO:0072170,"GO:0072170","metanephric tubule development","2/473","16/11852",0.13207619374806,0.13207619374806,0.927453163534563,"STAT1/LGR4",2
GO:0072234,"GO:0072234","metanephric nephron tubule development","2/473","16/11852",0.13207619374806,0.13207619374806,0.927453163534563,"STAT1/LGR4",2
GO:0097062,"GO:0097062","dendritic spine maintenance","2/473","16/11852",0.13207619374806,0.13207619374806,0.927453163534563,"ZMYND8/FYN",2
GO:0097734,"GO:0097734","extracellular exosome biogenesis","2/473","16/11852",0.13207619374806,0.13207619374806,0.927453163534563,"TSG101/PDCD6IP",2
GO:0106030,"GO:0106030","neuron projection fasciculation","2/473","16/11852",0.13207619374806,0.13207619374806,0.927453163534563,"NRP1/SEMA3A",2
GO:1903798,"GO:1903798","regulation of production of miRNAs involved in gene silencing by miRNA","2/473","16/11852",0.13207619374806,0.13207619374806,0.927453163534563,"NCOR1/ZMPSTE24",2
GO:1990182,"GO:1990182","exosomal secretion","2/473","16/11852",0.13207619374806,0.13207619374806,0.927453163534563,"TSG101/PDCD6IP",2
GO:0008285,"GO:0008285","negative regulation of cell proliferation","24/473","472/11852",0.132838899271628,0.132838899271628,0.927453163534563,"ILK/KANK2/SMAD4/IFT80/TSG101/F2R/PDE5A/SMARCA2/DLG3/EIF2AK2/CLMN/GAS8/JARID2/KLF11/TGFBR2/STAT1/PRKAR1A/SOX4/CYP1B1/KIFAP3/CDKN2C/PPP2R5C/CDKN1B/CD164",24
GO:0061387,"GO:0061387","regulation of extent of cell growth","6/473","87/11852",0.13385626526426,0.13385626526426,0.927453163534563,"ILK/CDKL5/RUFY3/MAP3K13/NRP1/SEMA3A",6
GO:0060412,"GO:0060412","ventricular septum morphogenesis","3/473","32/11852",0.133984893202392,0.133984893202392,0.927453163534563,"SMAD4/TGFBR2/SOX4",3
GO:0032874,"GO:0032874","positive regulation of stress-activated MAPK cascade","8/473","127/11852",0.1352213989206,0.1352213989206,0.927453163534563,"MAP3K3/MAP3K13/TNIK/EIF2AK2/EDAR/ARL6IP5/MDFIC/SEMA3A",8
GO:0001763,"GO:0001763","morphogenesis of a branching structure","9/473","148/11852",0.137624259711536,0.137624259711536,0.927453163534563,"ILK/PBX1/SMAD4/KDM5B/MAP3K13/NRP1/TGFBR2/LGR4/SEMA3A",9
GO:0006338,"GO:0006338","chromatin remodeling","9/473","148/11852",0.137624259711536,0.137624259711536,0.927453163534563,"CHRAC1/KDM5B/HJURP/SMARCA2/MBD2/JARID2/CENPW/CENPK/CENPI",9
GO:0043401,"GO:0043401","steroid hormone mediated signaling pathway","9/473","148/11852",0.137624259711536,0.137624259711536,0.927453163534563,"NCOR1/HDAC6/KANK2/NCOA3/PGRMC2/ABHD2/CALCOCO1/UBA5/ARNTL",9
GO:0032259,"GO:0032259","methylation","16/473","297/11852",0.137826972978372,0.137826972978372,0.927453163534563,"SMAD4/THADA/EEF1AKMT2/RAB6A/MBD2/JARID2/ATF7IP/PRDM8/COQ5/EEF1AKMT1/HENMT1/PCMT1/MAT2B/PCMTD1/METTL7A/ZMPSTE24",16
GO:0050771,"GO:0050771","negative regulation of axonogenesis","4/473","50/11852",0.137912508707701,0.137912508707701,0.927453163534563,"RUFY3/NRP1/PTK2/SEMA3A",4
GO:1901799,"GO:1901799","negative regulation of proteasomal protein catabolic process","4/473","50/11852",0.137912508707701,0.137912508707701,0.927453163534563,"USP19/ERLEC1/GABARAPL2/PBK",4
GO:1902017,"GO:1902017","regulation of cilium assembly","4/473","50/11852",0.137912508707701,0.137912508707701,0.927453163534563,"CDKL5/DYNC2LI1/ODF2L/TCTEX1D2",4
GO:0003231,"GO:0003231","cardiac ventricle development","6/473","88/11852",0.139145430881834,0.139145430881834,0.927453163534563,"FKBP1A/SMAD4/TGFBR2/MDM2/SOX4/ZMPSTE24",6
GO:0007292,"GO:0007292","female gamete generation","6/473","88/11852",0.139145430881834,0.139145430881834,0.927453163534563,"CDC25B/ASPM/PDE5A/MLH3/PRKAR1A/TTK",6
GO:0060048,"GO:0060048","cardiac muscle contraction","6/473","88/11852",0.139145430881834,0.139145430881834,0.927453163534563,"PIK3CG/PDE5A/DSC2/TMEM38B/CALM2/CALM1",6
GO:1901989,"GO:1901989","positive regulation of cell cycle phase transition","6/473","88/11852",0.139145430881834,0.139145430881834,0.927453163534563,"PBX1/CDC25B/CDC25C/MTA3/CUL4B/MDM2",6
GO:0051302,"GO:0051302","regulation of cell division","8/473","128/11852",0.139554245487054,0.139554245487054,0.927453163534563,"CDC25B/ASPM/NCOA3/CDC14B/CIT/ZFYVE19/CALM2/CALM1",8
GO:0070304,"GO:0070304","positive regulation of stress-activated protein kinase signaling cascade","8/473","128/11852",0.139554245487054,0.139554245487054,0.927453163534563,"MAP3K3/MAP3K13/TNIK/EIF2AK2/EDAR/ARL6IP5/MDFIC/SEMA3A",8
GO:0060401,"GO:0060401","cytosolic calcium ion transport","7/473","108/11852",0.140317405110961,0.140317405110961,0.927453163534563,"FKBP1A/PLCH1/F2R/FYN/TMEM38B/CALM2/CALM1",7
GO:0072080,"GO:0072080","nephron tubule development","5/473","69/11852",0.1406878155419,0.1406878155419,0.927453163534563,"ILK/PBX1/SMAD4/STAT1/LGR4",5
GO:0002279,"GO:0002279","mast cell activation involved in immune response","3/473","33/11852",0.143275690973994,0.143275690973994,0.927453163534563,"PIK3CG/STXBP1/SNAP23",3
GO:0007431,"GO:0007431","salivary gland development","3/473","33/11852",0.143275690973994,0.143275690973994,0.927453163534563,"NRP1/EDAR/SEMA3A",3
GO:0043303,"GO:0043303","mast cell degranulation","3/473","33/11852",0.143275690973994,0.143275690973994,0.927453163534563,"PIK3CG/STXBP1/SNAP23",3
GO:0051604,"GO:0051604","protein maturation","13/473","234/11852",0.143655082132841,0.143655082132841,0.927453163534563,"FKBP1A/C2CD3/PLAT/CASP8/SORL1/PSENEN/MDM2/SEC11C/TMEM59/SOX4/OMA1/ATP23/ZMPSTE24",13
GO:0031214,"GO:0031214","biomineral tissue development","6/473","89/11852",0.144530606351198,0.144530606351198,0.927453163534563,"NBR1/ZBTB40/TMEM38B/LGR4/SNX10/ZMPSTE24",6
GO:0030518,"GO:0030518","intracellular steroid hormone receptor signaling pathway","7/473","109/11852",0.145158994774359,0.145158994774359,0.927453163534563,"NCOR1/HDAC6/KANK2/NCOA3/CALCOCO1/UBA5/ARNTL",7
GO:1990845,"GO:1990845","adaptive thermogenesis","7/473","109/11852",0.145158994774359,0.145158994774359,0.927453163534563,"ACOT13/THADA/SORL1/LGR4/OMA1/ARNTL/IL18",7
GO:0008333,"GO:0008333","endosome to lysosome transport","4/473","51/11852",0.145243609183026,0.145243609183026,0.927453163534563,"TSG101/AKTIP/VPS39/HOOK3",4
GO:1905515,"GO:1905515","non-motile cilium assembly","4/473","51/11852",0.145243609183026,0.145243609183026,0.927453163534563,"C2CD3/IFT80/BBS2/BBS10",4
GO:0044272,"GO:0044272","sulfur compound biosynthetic process","9/473","150/11852",0.145755959673287,0.145755959673287,0.927453163534563,"ACSS2/PDK4/TPK1/B4GAT1/PDP1/MTHFD2L/MAT2B/ADI1/PPCS",9
GO:0003338,"GO:0003338","metanephros morphogenesis","2/473","17/11852",0.145911961729801,0.145911961729801,0.927453163534563,"STAT1/LGR4",2
GO:0006744,"GO:0006744","ubiquinone biosynthetic process","2/473","17/11852",0.145911961729801,0.145911961729801,0.927453163534563,"COQ5/COQ10B",2
GO:0007221,"GO:0007221","positive regulation of transcription of Notch receptor target","2/473","17/11852",0.145911961729801,0.145911961729801,0.927453163534563,"PBX1/STAT1",2
GO:0032727,"GO:0032727","positive regulation of interferon-alpha production","2/473","17/11852",0.145911961729801,0.145911961729801,0.927453163534563,"MAVS/STAT1",2
GO:0034501,"GO:0034501","protein localization to kinetochore","2/473","17/11852",0.145911961729801,0.145911961729801,0.927453163534563,"TTK/NDC80",2
GO:0035518,"GO:0035518","histone H2A monoubiquitination","2/473","17/11852",0.145911961729801,0.145911961729801,0.927453163534563,"CUL4B/BMI1",2
GO:0045822,"GO:0045822","negative regulation of heart contraction","2/473","17/11852",0.145911961729801,0.145911961729801,0.927453163534563,"PIK3CG/PDE5A",2
GO:0046628,"GO:0046628","positive regulation of insulin receptor signaling pathway","2/473","17/11852",0.145911961729801,0.145911961729801,0.927453163534563,"SORBS1/SORL1",2
GO:0051016,"GO:0051016","barbed-end actin filament capping","2/473","17/11852",0.145911961729801,0.145911961729801,0.927453163534563,"CARMIL1/MTPN",2
GO:0062009,"GO:0062009","secondary palate development","2/473","17/11852",0.145911961729801,0.145911961729801,0.927453163534563,"SMAD4/TGFBR2",2
GO:0070920,"GO:0070920","regulation of production of small RNA involved in gene silencing by RNA","2/473","17/11852",0.145911961729801,0.145911961729801,0.927453163534563,"NCOR1/ZMPSTE24",2
GO:0071359,"GO:0071359","cellular response to dsRNA","2/473","17/11852",0.145911961729801,0.145911961729801,0.927453163534563,"MAVS/RALB",2
GO:0072207,"GO:0072207","metanephric epithelium development","2/473","17/11852",0.145911961729801,0.145911961729801,0.927453163534563,"STAT1/LGR4",2
GO:0072243,"GO:0072243","metanephric nephron epithelium development","2/473","17/11852",0.145911961729801,0.145911961729801,0.927453163534563,"STAT1/LGR4",2
GO:0072606,"GO:0072606","interleukin-8 secretion","2/473","17/11852",0.145911961729801,0.145911961729801,0.927453163534563,"F2R/CD58",2
GO:1901663,"GO:1901663","quinone biosynthetic process","2/473","17/11852",0.145911961729801,0.145911961729801,0.927453163534563,"COQ5/COQ10B",2
GO:2000737,"GO:2000737","negative regulation of stem cell differentiation","2/473","17/11852",0.145911961729801,0.145911961729801,0.927453163534563,"TRIM6/N4BP2L2",2
GO:0003007,"GO:0003007","heart morphogenesis","10/473","171/11852",0.146308552186103,0.146308552186103,0.927453163534563,"FKBP1A/ILK/C2CD3/SMAD4/NRP1/TGFBR2/PTK2/MDM2/SOX4/ZMPSTE24",10
GO:0036473,"GO:0036473","cell death in response to oxidative stress","5/473","70/11852",0.146887104680195,0.146887104680195,0.927453163534563,"HDAC6/FYN/CYP1B1/ARL6IP5/MELK",5
GO:0007034,"GO:0007034","vacuolar transport","8/473","130/11852",0.148425618313574,0.148425618313574,0.927453163534563,"TSG101/AKTIP/VPS39/HOOK3/SORL1/NDFIP1/TMEM50B/CHMP1B",8
GO:0018107,"GO:0018107","peptidyl-threonine phosphorylation","7/473","110/11852",0.150079296911076,0.150079296911076,0.927453163534563,"CADM4/CIT/TGFBR2/TTK/TRIM6/CALM2/CALM1",7
GO:0006473,"GO:0006473","protein acetylation","10/473","172/11852",0.150192981216231,0.150192981216231,0.927453163534563,"SMAD4/SDR16C5/NCOA3/KAT6B/EHHADH/SOX4/YEATS4/ARNTL/EID1/ZMPSTE24",10
GO:0009247,"GO:0009247","glycolipid biosynthetic process","4/473","52/11852",0.152723338231244,0.152723338231244,0.927453163534563,"PIGB/PIGM/SCCPDH/B3GALT4",4
GO:0007094,"GO:0007094","mitotic spindle assembly checkpoint","3/473","34/11852",0.152772596473415,0.152772596473415,0.927453163534563,"TTK/BUB1/NDC80",3
GO:0031577,"GO:0031577","spindle checkpoint","3/473","34/11852",0.152772596473415,0.152772596473415,0.927453163534563,"TTK/BUB1/NDC80",3
GO:0071173,"GO:0071173","spindle assembly checkpoint","3/473","34/11852",0.152772596473415,0.152772596473415,0.927453163534563,"TTK/BUB1/NDC80",3
GO:0071174,"GO:0071174","mitotic spindle checkpoint","3/473","34/11852",0.152772596473415,0.152772596473415,0.927453163534563,"TTK/BUB1/NDC80",3
GO:0086065,"GO:0086065","cell communication involved in cardiac conduction","3/473","34/11852",0.152772596473415,0.152772596473415,0.927453163534563,"DSC2/CALM2/CALM1",3
GO:1901985,"GO:1901985","positive regulation of protein acetylation","3/473","34/11852",0.152772596473415,0.152772596473415,0.927453163534563,"SMAD4/SOX4/ARNTL",3
GO:0001676,"GO:0001676","long-chain fatty acid metabolic process","5/473","71/11852",0.153200938586753,0.153200938586753,0.927453163534563,"ACOX1/FAAH2/CBR1/CYP1B1/PNPLA8",5
GO:0050715,"GO:0050715","positive regulation of cytokine secretion","5/473","71/11852",0.153200938586753,0.153200938586753,0.927453163534563,"FRMD8/F2R/MAVS/TRIM6/CD58",5
GO:0061326,"GO:0061326","renal tubule development","5/473","71/11852",0.153200938586753,0.153200938586753,0.927453163534563,"ILK/PBX1/SMAD4/STAT1/LGR4",5
GO:0051235,"GO:0051235","maintenance of location","13/473","237/11852",0.153537445271052,0.153537445271052,0.927453163534563,"FKBP1A/GM2A/GPSM2/PLCH1/ASPM/F2R/TTC39B/ARL2BP/CLMN/SORL1/TMEM38B/CALM2/CALM1",13
GO:0050792,"GO:0050792","regulation of viral process","10/473","173/11852",0.154129405576536,0.154129405576536,0.927453163534563,"EIF2AK4/TRIM5/TSG101/MAVS/EIF2AK2/KPNA2/STAT1/TRIM6/VAPA/MDFIC",10
GO:1903530,"GO:1903530","regulation of secretion by cell","23/473","459/11852",0.154404576623231,0.154404576623231,0.927453163534563,"MYO18A/DPP4/SMAD4/FRMD8/STXBP6/KDM5B/KCNMB4/TSG101/F2R/ARL2BP/GOLPH3L/STXBP1/MAVS/PDCD6IP/RAP1B/LGR4/SOX4/RALB/TRIM6/RAB10/ARNTL/ARF6/CD58",23
GO:0043405,"GO:0043405","regulation of MAP kinase activity","14/473","259/11852",0.154502839593163,0.154502839593163,0.927453163534563,"MADD/ILK/MAP3K3/TSG101/F2R/PIK3CG/PDE5A/IQGAP3/STK38/MAP3K13/TNIK/EIF2AK2/SORL1/MDFIC",14
GO:0061041,"GO:0061041","regulation of wound healing","6/473","91/11852",0.155580968806434,0.155580968806434,0.927453163534563,"CADM4/PHLDB2/F2R/PLAT/TGFBR2/CDKN1B",6
GO:0043406,"GO:0043406","positive regulation of MAP kinase activity","11/473","195/11852",0.157075150106134,0.157075150106134,0.927453163534563,"MADD/ILK/MAP3K3/F2R/PIK3CG/PDE5A/IQGAP3/MAP3K13/TNIK/EIF2AK2/MDFIC",11
GO:0045931,"GO:0045931","positive regulation of mitotic cell cycle","8/473","132/11852",0.15756484163119,0.15756484163119,0.927453163534563,"PBX1/CDC25B/CDC25C/MTA3/CUL4B/MDM2/NDC80/DYNLT3",8
GO:0007031,"GO:0007031","peroxisome organization","5/473","72/11852",0.159625926724657,0.159625926724657,0.927453163534563,"ACOX1/MAVS/EHHADH/UBE2D1/PEX1",5
GO:0016575,"GO:0016575","histone deacetylation","5/473","72/11852",0.159625926724657,0.159625926724657,0.927453163534563,"HDAC6/HDAC11/SDR16C5/MTA3/SAP30",5
GO:0043500,"GO:0043500","muscle adaptation","5/473","72/11852",0.159625926724657,0.159625926724657,0.927453163534563,"SMAD4/PDE5A/JARID2/PTK2/MTPN",5
GO:0046425,"GO:0046425","regulation of JAK-STAT cascade","5/473","72/11852",0.159625926724657,0.159625926724657,0.927453163534563,"F2R/ARL2BP/FYN/CYP1B1/IL18",5
GO:0003272,"GO:0003272","endocardial cushion formation","2/473","18/11852",0.160027426161871,0.160027426161871,0.927453163534563,"SMAD4/TGFBR2",2
GO:0003351,"GO:0003351","epithelial cilium movement","2/473","18/11852",0.160027426161871,0.160027426161871,0.927453163534563,"GAS8/SPA17",2
GO:0006743,"GO:0006743","ubiquinone metabolic process","2/473","18/11852",0.160027426161871,0.160027426161871,0.927453163534563,"COQ5/COQ10B",2
GO:0010644,"GO:0010644","cell communication by electrical coupling","2/473","18/11852",0.160027426161871,0.160027426161871,0.927453163534563,"CALM2/CALM1",2
GO:0032461,"GO:0032461","positive regulation of protein oligomerization","2/473","18/11852",0.160027426161871,0.160027426161871,0.927453163534563,"HDAC6/BIK",2
GO:0043555,"GO:0043555","regulation of translation in response to stress","2/473","18/11852",0.160027426161871,0.160027426161871,0.927453163534563,"EIF2AK4/EIF2AK2",2
GO:0046475,"GO:0046475","glycerophospholipid catabolic process","2/473","18/11852",0.160027426161871,0.160027426161871,0.927453163534563,"LDLR/PNPLA8",2
GO:0071312,"GO:0071312","cellular response to alkaloid","2/473","18/11852",0.160027426161871,0.160027426161871,0.927453163534563,"MDM2/TMEM38B",2
GO:0071425,"GO:0071425","hematopoietic stem cell proliferation","2/473","18/11852",0.160027426161871,0.160027426161871,0.927453163534563,"EIF2AK2/N4BP2L2",2
GO:0140112,"GO:0140112","extracellular vesicle biogenesis","2/473","18/11852",0.160027426161871,0.160027426161871,0.927453163534563,"TSG101/PDCD6IP",2
GO:1905809,"GO:1905809","negative regulation of synapse organization","2/473","18/11852",0.160027426161871,0.160027426161871,0.927453163534563,"FYN/PTK2",2
GO:1990774,"GO:1990774","tumor necrosis factor secretion","2/473","18/11852",0.160027426161871,0.160027426161871,0.927453163534563,"FRMD8/MAVS",2
GO:0046661,"GO:0046661","male sex differentiation","7/473","112/11852",0.160150445547855,0.160150445547855,0.927453163534563,"SMAD4/BIK/AGO4/ASPM/LGR4/RHOBTB3/SEMA3A",7
GO:0003151,"GO:0003151","outflow tract morphogenesis","4/473","53/11852",0.160345521060644,0.160345521060644,0.927453163534563,"ILK/SMAD4/NRP1/TGFBR2",4
GO:0003281,"GO:0003281","ventricular septum development","4/473","53/11852",0.160345521060644,0.160345521060644,0.927453163534563,"SMAD4/TGFBR2/MDM2/SOX4",4
GO:0006977,"GO:0006977","DNA damage response, signal transduction by p53 class mediator resulting in cell cycle arrest","4/473","53/11852",0.160345521060644,0.160345521060644,0.927453163534563,"CDC25C/MDM2/SOX4/CDKN1B",4
GO:0033627,"GO:0033627","cell adhesion mediated by integrin","4/473","53/11852",0.160345521060644,0.160345521060644,0.927453163534563,"DPP4/PIK3CG/PTK2/CYP1B1",4
GO:0046470,"GO:0046470","phosphatidylcholine metabolic process","4/473","53/11852",0.160345521060644,0.160345521060644,0.927453163534563,"MBOAT1/LDLR/ABHD3/PNPLA8",4
GO:0051784,"GO:0051784","negative regulation of nuclear division","4/473","53/11852",0.160345521060644,0.160345521060644,0.927453163534563,"PRKAR1A/TTK/BUB1/NDC80",4
GO:0010948,"GO:0010948","negative regulation of cell cycle process","16/473","305/11852",0.161102545530828,0.161102545530828,0.927453163534563,"KANK2/CDC25C/ABRAXAS1/CDC14B/ZFYVE19/MDM2/NEK2/PRKAR1A/SOX4/TTK/BUB1/BMI1/PSMD5/NDC80/CDKN2C/CDKN1B",16
GO:1903828,"GO:1903828","negative regulation of cellular protein localization","6/473","92/11852",0.161241957461188,0.161241957461188,0.927453163534563,"ABHD17C/PPP2R5A/ERLEC1/TMEM59/MDFIC/ARF6",6
GO:0016485,"GO:0016485","protein processing","10/473","175/11852",0.162155850934949,0.162155850934949,0.927453163534563,"C2CD3/PLAT/CASP8/PSENEN/MDM2/SEC11C/TMEM59/OMA1/ATP23/ZMPSTE24",10
GO:0019076,"GO:0019076","viral release from host cell","3/473","35/11852",0.162461762477213,0.162461762477213,0.927453163534563,"TRIM5/TSG101/VAPA",3
GO:0035307,"GO:0035307","positive regulation of protein dephosphorylation","3/473","35/11852",0.162461762477213,0.162461762477213,0.927453163534563,"PPP2R5A/CALM2/CALM1",3
GO:0035890,"GO:0035890","exit from host","3/473","35/11852",0.162461762477213,0.162461762477213,0.927453163534563,"TRIM5/TSG101/VAPA",3
GO:0035891,"GO:0035891","exit from host cell","3/473","35/11852",0.162461762477213,0.162461762477213,0.927453163534563,"TRIM5/TSG101/VAPA",3
GO:0042310,"GO:0042310","vasoconstriction","3/473","35/11852",0.162461762477213,0.162461762477213,0.927453163534563,"KCNMB4/F2R/BBS2",3
GO:0050994,"GO:0050994","regulation of lipid catabolic process","3/473","35/11852",0.162461762477213,0.162461762477213,0.927453163534563,"PIK3CG/SORL1/LDLR",3
GO:0051489,"GO:0051489","regulation of filopodium assembly","3/473","35/11852",0.162461762477213,0.162461762477213,0.927453163534563,"ZMYND8/NRP1/ARF6",3
GO:0052126,"GO:0052126","movement in host environment","3/473","35/11852",0.162461762477213,0.162461762477213,0.927453163534563,"TRIM5/TSG101/VAPA",3
GO:0052192,"GO:0052192","movement in environment of other organism involved in symbiotic interaction","3/473","35/11852",0.162461762477213,0.162461762477213,0.927453163534563,"TRIM5/TSG101/VAPA",3
GO:1901652,"GO:1901652","response to peptide","19/473","373/11852",0.16466371743456,0.16466371743456,0.927453163534563,"ADCY7/PDK4/SORBS1/FYN/STAT2/KLF11/SORL1/KLF3/PTK2/MDM2/STAT1/PRKAR1A/RAP1B/ATP6V1A/GGH/RAB10/EPM2AIP1/GNAI1/CDKN1B",19
GO:0035304,"GO:0035304","regulation of protein dephosphorylation","7/473","113/11852",0.165298360248186,0.165298360248186,0.927453163534563,"FKBP1A/RCAN3/EIF2AK2/PPP2R5A/CALM2/CALM1/PPP2R5C",7
GO:0000819,"GO:0000819","sister chromatid segregation","10/473","176/11852",0.166244613119012,0.166244613119012,0.927453163534563,"SMC4/SPAG5/NUF2/NEK2/NCAPG/TTK/BUB1/CENPK/NDC80/CHMP1B",10
GO:0051193,"GO:0051193","regulation of cofactor metabolic process","6/473","93/11852",0.166990567720776,0.166990567720776,0.927453163534563,"NCOR1/HDAC6/PDK4/FYN/ME1/PDP1",6
GO:0071482,"GO:0071482","cellular response to light stimulus","6/473","93/11852",0.166990567720776,0.166990567720776,0.927453163534563,"EIF2AK4/CUL4B/XPA/MDM2/CALM1/PBK",6
GO:0140056,"GO:0140056","organelle localization by membrane tethering","9/473","155/11852",0.167107760651061,0.167107760651061,0.927453163534563,"C2CD3/STXBP1/EXOC6B/STX2/NEK2/STX7/RALB/RAB10/CEP57",9
GO:0007586,"GO:0007586","digestion","4/473","54/11852",0.168103881205108,0.168103881205108,0.927453163534563,"TJP2/EPB41/LDLR/SNX10",4
GO:0034109,"GO:0034109","homotypic cell-cell adhesion","4/473","54/11852",0.168103881205108,0.168103881205108,0.927453163534563,"ILK/PIK3CG/DSC2/STXBP1",4
GO:0051310,"GO:0051310","metaphase plate congression","4/473","54/11852",0.168103881205108,0.168103881205108,0.927453163534563,"SPAG5/NUF2/NDC80/CHMP1B",4
GO:0072078,"GO:0072078","nephron tubule morphogenesis","4/473","54/11852",0.168103881205108,0.168103881205108,0.927453163534563,"ILK/PBX1/SMAD4/LGR4",4
GO:0072431,"GO:0072431","signal transduction involved in mitotic G1 DNA damage checkpoint","4/473","54/11852",0.168103881205108,0.168103881205108,0.927453163534563,"CDC25C/MDM2/SOX4/CDKN1B",4
GO:1902400,"GO:1902400","intracellular signal transduction involved in G1 DNA damage checkpoint","4/473","54/11852",0.168103881205108,0.168103881205108,0.927453163534563,"CDC25C/MDM2/SOX4/CDKN1B",4
GO:0006296,"GO:0006296","nucleotide-excision repair, DNA incision, 5'-to lesion","3/473","36/11852",0.17232942573733,0.17232942573733,0.927453163534563,"CUL4B/XPA/GTF2H5",3
GO:0021795,"GO:0021795","cerebral cortex cell migration","3/473","36/11852",0.17232942573733,0.17232942573733,0.927453163534563,"NRP1/DIXDC1/SEMA3A",3
GO:0045841,"GO:0045841","negative regulation of mitotic metaphase/anaphase transition","3/473","36/11852",0.17232942573733,0.17232942573733,0.927453163534563,"TTK/BUB1/NDC80",3
GO:0050805,"GO:0050805","negative regulation of synaptic transmission","3/473","36/11852",0.17232942573733,0.17232942573733,0.927453163534563,"STXBP1/RAP1B/GNAI1",3
GO:0072132,"GO:0072132","mesenchyme morphogenesis","3/473","36/11852",0.17232942573733,0.17232942573733,0.927453163534563,"SMAD4/TGFBR2/MDM2",3
GO:1902100,"GO:1902100","negative regulation of metaphase/anaphase transition of cell cycle","3/473","36/11852",0.17232942573733,0.17232942573733,0.927453163534563,"TTK/BUB1/NDC80",3
GO:0034644,"GO:0034644","cellular response to UV","5/473","74/11852",0.172795350118686,0.172795350118686,0.927453163534563,"EIF2AK4/CUL4B/XPA/MDM2/PBK",5
GO:0048010,"GO:0048010","vascular endothelial growth factor receptor signaling pathway","5/473","74/11852",0.172795350118686,0.172795350118686,0.927453163534563,"CADM4/VAV3/FYN/NRP1/PTK2",5
GO:0048013,"GO:0048013","ephrin receptor signaling pathway","5/473","74/11852",0.172795350118686,0.172795350118686,0.927453163534563,"ANKS1A/VAV3/FYN/PTK2/PSENEN",5
GO:0034728,"GO:0034728","nucleosome organization","6/473","94/11852",0.172824530058876,0.172824530058876,0.927453163534563,"HJURP/KAT6B/CENPW/ASF1A/CENPK/CENPI",6
GO:0051403,"GO:0051403","stress-activated MAPK cascade","12/473","221/11852",0.173746212874546,0.173746212874546,0.927453163534563,"NCOR1/MAP3K3/NBR1/IRAK4/MAP3K13/TNIK/EIF2AK2/EDAR/ARL6IP5/MDFIC/SEMA3A/PBK",12
GO:1903532,"GO:1903532","positive regulation of secretion by cell","13/473","243/11852",0.174338218462359,0.174338218462359,0.927453163534563,"MYO18A/SMAD4/FRMD8/TSG101/F2R/GOLPH3L/STXBP1/MAVS/PDCD6IP/SOX4/TRIM6/ARF6/CD58",13
GO:0007616,"GO:0007616","long-term memory","2/473","19/11852",0.174378361165444,0.174378361165444,0.927453163534563,"EIF2AK4/LDLR",2
GO:0009081,"GO:0009081","branched-chain amino acid metabolic process","2/473","19/11852",0.174378361165444,0.174378361165444,0.927453163534563,"AUH/ACADSB",2
GO:0009083,"GO:0009083","branched-chain amino acid catabolic process","2/473","19/11852",0.174378361165444,0.174378361165444,0.927453163534563,"AUH/ACADSB",2
GO:0021846,"GO:0021846","cell proliferation in forebrain","2/473","19/11852",0.174378361165444,0.174378361165444,0.927453163534563,"HOOK3/DIXDC1",2
GO:0040020,"GO:0040020","regulation of meiotic nuclear division","2/473","19/11852",0.174378361165444,0.174378361165444,0.927453163534563,"PRKAR1A/TTK",2
GO:0042451,"GO:0042451","purine nucleoside biosynthetic process","2/473","19/11852",0.174378361165444,0.174378361165444,0.927453163534563,"PRTFDC1/NME7",2
GO:0045932,"GO:0045932","negative regulation of muscle contraction","2/473","19/11852",0.174378361165444,0.174378361165444,0.927453163534563,"PIK3CG/PDE5A",2
GO:0046129,"GO:0046129","purine ribonucleoside biosynthetic process","2/473","19/11852",0.174378361165444,0.174378361165444,0.927453163534563,"PRTFDC1/NME7",2
GO:0046640,"GO:0046640","regulation of alpha-beta T cell proliferation","2/473","19/11852",0.174378361165444,0.174378361165444,0.927453163534563,"TGFBR2/IL18",2
GO:0060445,"GO:0060445","branching involved in salivary gland morphogenesis","2/473","19/11852",0.174378361165444,0.174378361165444,0.927453163534563,"NRP1/SEMA3A",2
GO:0070841,"GO:0070841","inclusion body assembly","2/473","19/11852",0.174378361165444,0.174378361165444,0.927453163534563,"HDAC6/SORL1",2
GO:0070932,"GO:0070932","histone H3 deacetylation","2/473","19/11852",0.174378361165444,0.174378361165444,0.927453163534563,"HDAC6/HDAC11",2
GO:0097150,"GO:0097150","neuronal stem cell population maintenance","2/473","19/11852",0.174378361165444,0.174378361165444,0.927453163534563,"ASPM/HOOK3",2
GO:1900078,"GO:1900078","positive regulation of cellular response to insulin stimulus","2/473","19/11852",0.174378361165444,0.174378361165444,0.927453163534563,"SORBS1/SORL1",2
GO:2000114,"GO:2000114","regulation of establishment of cell polarity","2/473","19/11852",0.174378361165444,0.174378361165444,0.927453163534563,"RUFY3/RAP1B",2
GO:2000209,"GO:2000209","regulation of anoikis","2/473","19/11852",0.174378361165444,0.174378361165444,0.927453163534563,"PDK4/PTK2",2
GO:0006631,"GO:0006631","fatty acid metabolic process","14/473","265/11852",0.174422052269382,0.174422052269382,0.927453163534563,"ACSS2/ACOX1/ZADH2/PDK4/FAAH2/AUH/ACADSB/EHHADH/ABHD2/CBR1/ABHD3/PDP1/CYP1B1/PNPLA8",14
GO:0044057,"GO:0044057","regulation of system process","17/473","332/11852",0.175645777864903,0.175645777864903,0.927453163534563,"SMAD4/ZMYND8/EPB41/KCNMB4/F2R/PIK3CG/PDE5A/DSC2/JARID2/PTK2/MDM2/TMEM38B/MTPN/CALM2/CALM1/ZMPSTE24/SEMA3A",17
GO:0018210,"GO:0018210","peptidyl-threonine modification","7/473","115/11852",0.175811159505411,0.175811159505411,0.927453163534563,"CADM4/CIT/TGFBR2/TTK/TRIM6/CALM2/CALM1",7
GO:0048639,"GO:0048639","positive regulation of developmental growth","7/473","115/11852",0.175811159505411,0.175811159505411,0.927453163534563,"ILK/CDKL5/RUFY3/MAP3K13/NRP1/TGFBR2/BBS2",7
GO:0048754,"GO:0048754","branching morphogenesis of an epithelial tube","7/473","115/11852",0.175811159505411,0.175811159505411,0.927453163534563,"ILK/PBX1/SMAD4/KDM5B/NRP1/TGFBR2/LGR4",7
GO:0051494,"GO:0051494","negative regulation of cytoskeleton organization","7/473","115/11852",0.175811159505411,0.175811159505411,0.927453163534563,"HDAC6/SMAD4/PHLDB2/CARMIL1/GMFB/NEK2/MTPN",7
GO:0072413,"GO:0072413","signal transduction involved in mitotic cell cycle checkpoint","4/473","55/11852",0.175992059248143,0.175992059248143,0.927453163534563,"CDC25C/MDM2/SOX4/CDKN1B",4
GO:1902402,"GO:1902402","signal transduction involved in mitotic DNA damage checkpoint","4/473","55/11852",0.175992059248143,0.175992059248143,0.927453163534563,"CDC25C/MDM2/SOX4/CDKN1B",4
GO:1902403,"GO:1902403","signal transduction involved in mitotic DNA integrity checkpoint","4/473","55/11852",0.175992059248143,0.175992059248143,0.927453163534563,"CDC25C/MDM2/SOX4/CDKN1B",4
GO:0051606,"GO:0051606","detection of stimulus","8/473","136/11852",0.176613159935323,0.176613159935323,0.927453163534563,"NEK1/KCNMB4/FYN/GNAQ/CUL4B/SOX4/CALM2/CALM1",8
GO:0046677,"GO:0046677","response to antibiotic","12/473","222/11852",0.177517367285839,0.177517367285839,0.927453163534563,"HDAC6/ADCY7/KDM5B/FYN/CASP8/MDM2/STAT1/GGH/CYP1B1/GNAI1/CDKN1B/GLRX2",12
GO:0009566,"GO:0009566","fertilization","6/473","95/11852",0.178741514395997,0.178741514395997,0.927453163534563,"SMAD4/KDM5B/STXBP1/STX2/ABHD2/SPA17",6
GO:0048675,"GO:0048675","axon extension","6/473","95/11852",0.178741514395997,0.178741514395997,0.927453163534563,"ILK/CDKL5/RUFY3/MAP3K13/NRP1/SEMA3A",6
GO:0021782,"GO:0021782","glial cell development","5/473","75/11852",0.179532575941425,0.179532575941425,0.927453163534563,"ILK/HDAC11/LDLR/PRDM8/SOX4",5
GO:0048194,"GO:0048194","Golgi vesicle budding","5/473","75/11852",0.179532575941425,0.179532575941425,0.927453163534563,"MYO18A/GOLGA2/TRAPPC6B/GOLPH3L/VAPA",5
GO:1904892,"GO:1904892","regulation of STAT cascade","5/473","75/11852",0.179532575941425,0.179532575941425,0.927453163534563,"F2R/ARL2BP/FYN/CYP1B1/IL18",5
GO:0030307,"GO:0030307","positive regulation of cell growth","7/473","116/11852",0.18117281703859,0.18117281703859,0.927453163534563,"ILK/CDKL5/RUFY3/MAP3K13/NRP1/MTPN/CDKN2AIP",7
GO:0098813,"GO:0098813","nuclear chromosome segregation","12/473","223/11852",0.181327844864084,0.181327844864084,0.927453163534563,"AGO4/SMC4/SPAG5/NUF2/MLH3/NEK2/NCAPG/TTK/BUB1/CENPK/NDC80/CHMP1B",12
GO:0050770,"GO:0050770","regulation of axonogenesis","8/473","137/11852",0.181528976965211,0.181528976965211,0.927453163534563,"ILK/CDKL5/KIF13B/RUFY3/MAP3K13/NRP1/PTK2/SEMA3A",8
GO:0061138,"GO:0061138","morphogenesis of a branching epithelium","8/473","137/11852",0.181528976965211,0.181528976965211,0.927453163534563,"ILK/PBX1/SMAD4/KDM5B/NRP1/TGFBR2/LGR4/SEMA3A",8
GO:0001954,"GO:0001954","positive regulation of cell-matrix adhesion","3/473","37/11852",0.182361949594747,0.182361949594747,0.927453163534563,"ILK/NRP1/PLEKHA2",3
GO:0003229,"GO:0003229","ventricular cardiac muscle tissue development","3/473","37/11852",0.182361949594747,0.182361949594747,0.927453163534563,"FKBP1A/SMAD4/ZMPSTE24",3
GO:0003341,"GO:0003341","cilium movement","3/473","37/11852",0.182361949594747,0.182361949594747,0.927453163534563,"GAS8/BBS2/SPA17",3
GO:0009593,"GO:0009593","detection of chemical stimulus","3/473","37/11852",0.182361949594747,0.182361949594747,0.927453163534563,"KCNMB4/CALM2/CALM1",3
GO:0042769,"GO:0042769","DNA damage response, detection of DNA damage","3/473","37/11852",0.182361949594747,0.182361949594747,0.927453163534563,"NEK1/CUL4B/SOX4",3
GO:0042987,"GO:0042987","amyloid precursor protein catabolic process","3/473","37/11852",0.182361949594747,0.182361949594747,0.927453163534563,"FKBP1A/SORL1/PSENEN",3
GO:0043001,"GO:0043001","Golgi to plasma membrane protein transport","3/473","37/11852",0.182361949594747,0.182361949594747,0.927453163534563,"GOLPH3L/BBS2/RAB10",3
GO:0045197,"GO:0045197","establishment or maintenance of epithelial cell apical/basal polarity","3/473","37/11852",0.182361949594747,0.182361949594747,0.927453163534563,"ILK/DLG3/PDCD6IP",3
GO:0120163,"GO:0120163","negative regulation of cold-induced thermogenesis","3/473","37/11852",0.182361949594747,0.182361949594747,0.927453163534563,"ACOT13/LGR4/ARNTL",3
GO:1905819,"GO:1905819","negative regulation of chromosome separation","3/473","37/11852",0.182361949594747,0.182361949594747,0.927453163534563,"TTK/BUB1/NDC80",3
GO:2000816,"GO:2000816","negative regulation of mitotic sister chromatid separation","3/473","37/11852",0.182361949594747,0.182361949594747,0.927453163534563,"TTK/BUB1/NDC80",3
GO:0003013,"GO:0003013","circulatory system process","16/473","312/11852",0.183070584368705,0.183070584368705,0.927453163534563,"KCNMB4/F2R/PIK3CG/PDE5A/TBC1D8/FYN/DSC2/MDM2/TMEM38B/STAT1/BBS2/CALM2/CALM1/PPCS/ZMPSTE24/SEMA3A",16
GO:0007283,"GO:0007283","spermatogenesis","16/473","312/11852",0.183070584368705,0.183070584368705,0.927453163534563,"SMAD4/ACOX1/HERPUD2/CDC25C/KATNAL1/ASPM/SMARCA2/ABHD2/PAFAH1B2/LGR4/ICA1L/BBS2/SPA17/ARNTL/CEP57/MORN2",16
GO:0090307,"GO:0090307","mitotic spindle assembly","4/473","56/11852",0.184003630716659,0.184003630716659,0.927453163534563,"GOLGA2/TPX2/NEK2/CHMP1B",4
GO:1901019,"GO:1901019","regulation of calcium ion transmembrane transporter activity","4/473","56/11852",0.184003630716659,0.184003630716659,0.927453163534563,"FKBP1A/THADA/CALM2/CALM1",4
GO:1903391,"GO:1903391","regulation of adherens junction organization","4/473","56/11852",0.184003630716659,0.184003630716659,0.927453163534563,"PHLDB2/NRP1/PTK2/ARF6",4
GO:0003006,"GO:0003006","developmental process involved in reproduction","22/473","448/11852",0.184274574010586,0.184274574010586,0.927453163534563,"PBX1/SMAD4/BIK/CDC25B/KDM5B/AGO4/ASPM/PDE5A/SMARCA2/CASP8/STXBP1/PTK2/IRF2BPL/ABHD2/LGR4/ICA1L/BBS2/RHOBTB3/CENPI/CEP57/CDKN1B/SEMA3A",22
GO:0045596,"GO:0045596","negative regulation of cell differentiation","23/473","471/11852",0.184703274841288,0.184703274841288,0.927453163534563,"USF3/PBX1/SMAD4/EIF2AK4/ZADH2/ASPM/NBR1/ABCA5/RUFY3/HOOK3/SORL1/NRP1/LDLR/PTK2/MDM2/STAT1/TRIM6/DIXDC1/ARNTL/N4BP2L2/IL18/ARF6/SEMA3A",23
GO:0008584,"GO:0008584","male gonad development","6/473","96/11852",0.184739134301659,0.184739134301659,0.927453163534563,"SMAD4/BIK/AGO4/ASPM/RHOBTB3/SEMA3A",6
GO:2000134,"GO:2000134","negative regulation of G1/S transition of mitotic cell cycle","6/473","96/11852",0.184739134301659,0.184739134301659,0.927453163534563,"KANK2/CDC25C/MDM2/SOX4/CDKN2C/CDKN1B",6
GO:0042147,"GO:0042147","retrograde transport, endosome to Golgi","5/473","76/11852",0.18636655349878,0.18636655349878,0.927453163534563,"ERC1/RAB6A/TBC1D5/RAB6B/RHOBTB3",5
GO:0007098,"GO:0007098","centrosome cycle","7/473","117/11852",0.186602421461869,0.186602421461869,0.927453163534563,"GOLGA2/C2CD3/CEP68/PDCD6IP/NEK2/CETN3/CHMP1B",7
GO:0000075,"GO:0000075","cell cycle checkpoint","11/473","203/11852",0.188618942067212,0.188618942067212,0.927453163534563,"EIF2AK4/CDC25C/ABRAXAS1/CDC14B/ZFYVE19/MDM2/SOX4/TTK/BUB1/NDC80/CDKN1B",11
GO:0005980,"GO:0005980","glycogen catabolic process","2/473","20/11852",0.188923611955144,0.188923611955144,0.927453163534563,"PGM2L1/CALM1",2
GO:0008045,"GO:0008045","motor neuron axon guidance","2/473","20/11852",0.188923611955144,0.188923611955144,0.927453163534563,"NRP1/SEMA3A",2
GO:0009067,"GO:0009067","aspartate family amino acid biosynthetic process","2/473","20/11852",0.188923611955144,0.188923611955144,0.927453163534563,"MTHFD2L/ADI1",2
GO:0021884,"GO:0021884","forebrain neuron development","2/473","20/11852",0.188923611955144,0.188923611955144,0.927453163534563,"NRP1/SEMA3A",2
GO:0032647,"GO:0032647","regulation of interferon-alpha production","2/473","20/11852",0.188923611955144,0.188923611955144,0.927453163534563,"MAVS/STAT1",2
GO:0035456,"GO:0035456","response to interferon-beta","2/473","20/11852",0.188923611955144,0.188923611955144,0.927453163534563,"STAT1/TRIM6",2
GO:0046006,"GO:0046006","regulation of activated T cell proliferation","2/473","20/11852",0.188923611955144,0.188923611955144,0.927453163534563,"PRKAR1A/IL18",2
GO:0050849,"GO:0050849","negative regulation of calcium-mediated signaling","2/473","20/11852",0.188923611955144,0.188923611955144,0.927453163534563,"CALM2/CALM1",2
GO:0055022,"GO:0055022","negative regulation of cardiac muscle tissue growth","2/473","20/11852",0.188923611955144,0.188923611955144,0.927453163534563,"JARID2/TGFBR2",2
GO:0061117,"GO:0061117","negative regulation of heart growth","2/473","20/11852",0.188923611955144,0.188923611955144,0.927453163534563,"JARID2/TGFBR2",2
GO:0070102,"GO:0070102","interleukin-6-mediated signaling pathway","2/473","20/11852",0.188923611955144,0.188923611955144,0.927453163534563,"SMAD4/STAT1",2
GO:0072210,"GO:0072210","metanephric nephron development","2/473","20/11852",0.188923611955144,0.188923611955144,0.927453163534563,"STAT1/LGR4",2
GO:1903077,"GO:1903077","negative regulation of protein localization to plasma membrane","2/473","20/11852",0.188923611955144,0.188923611955144,0.927453163534563,"PPP2R5A/TMEM59",2
GO:0050714,"GO:0050714","positive regulation of protein secretion","9/473","160/11852",0.189838501199399,0.189838501199399,0.927453163534563,"MYO18A/FRMD8/F2R/GOLPH3L/MAVS/SOX4/TRIM6/ARF6/CD58",9
GO:0046546,"GO:0046546","development of primary male sexual characteristics","6/473","97/11852",0.190814951174261,0.190814951174261,0.927453163534563,"SMAD4/BIK/AGO4/ASPM/RHOBTB3/SEMA3A",6
GO:0043903,"GO:0043903","regulation of symbiosis, encompassing mutualism through parasitism","10/473","182/11852",0.19179125147993,0.19179125147993,0.927453163534563,"EIF2AK4/TRIM5/TSG101/MAVS/EIF2AK2/KPNA2/STAT1/TRIM6/VAPA/MDFIC",10
GO:0048813,"GO:0048813","dendrite morphogenesis","7/473","118/11852",0.192098252315729,0.192098252315729,0.927453163534563,"HDAC6/ILK/CDKL5/FYN/TNIK/NRP1/SEMA3A",7
GO:0046717,"GO:0046717","acid secretion","4/473","57/11852",0.192132123140278,0.192132123140278,0.927453163534563,"SLC38A2/STXBP1/SNX10/PNPLA8",4
GO:0001895,"GO:0001895","retina homeostasis","3/473","38/11852",0.192545861999097,0.192545861999097,0.927453163534563,"BBS2/BBS10/DRAM2",3
GO:0005978,"GO:0005978","glycogen biosynthetic process","3/473","38/11852",0.192545861999097,0.192545861999097,0.927453163534563,"SORBS1/PGM2L1/EPM2AIP1",3
GO:0009250,"GO:0009250","glucan biosynthetic process","3/473","38/11852",0.192545861999097,0.192545861999097,0.927453163534563,"SORBS1/PGM2L1/EPM2AIP1",3
GO:0015800,"GO:0015800","acidic amino acid transport","3/473","38/11852",0.192545861999097,0.192545861999097,0.927453163534563,"SLC38A2/STXBP1/ARL6IP5",3
GO:0019068,"GO:0019068","virion assembly","3/473","38/11852",0.192545861999097,0.192545861999097,0.927453163534563,"TSG101/PDCD6IP/CHMP1B",3
GO:0032456,"GO:0032456","endocytic recycling","3/473","38/11852",0.192545861999097,0.192545861999097,0.927453163534563,"SORL1/ARL4C/ARF6",3
GO:0033683,"GO:0033683","nucleotide-excision repair, DNA incision","3/473","38/11852",0.192545861999097,0.192545861999097,0.927453163534563,"CUL4B/XPA/GTF2H5",3
GO:0042531,"GO:0042531","positive regulation of tyrosine phosphorylation of STAT protein","3/473","38/11852",0.192545861999097,0.192545861999097,0.927453163534563,"ARL2BP/FYN/IL18",3
GO:0043551,"GO:0043551","regulation of phosphatidylinositol 3-kinase activity","3/473","38/11852",0.192545861999097,0.192545861999097,0.927453163534563,"SOCS6/VAV3/PTK2",3
GO:0045576,"GO:0045576","mast cell activation","3/473","38/11852",0.192545861999097,0.192545861999097,0.927453163534563,"PIK3CG/STXBP1/SNAP23",3
GO:0097756,"GO:0097756","negative regulation of blood vessel diameter","3/473","38/11852",0.192545861999097,0.192545861999097,0.927453163534563,"KCNMB4/F2R/BBS2",3
GO:2000772,"GO:2000772","regulation of cellular senescence","3/473","38/11852",0.192545861999097,0.192545861999097,0.927453163534563,"MAP3K3/ARNTL/ZMPSTE24",3
GO:0032870,"GO:0032870","cellular response to hormone stimulus","24/473","497/11852",0.192815744882619,0.192815744882619,0.927453163534563,"NCOR1/HDAC6/KANK2/ADCY7/PDK4/SORBS1/FYN/GNAQ/NCOA3/SORL1/PGRMC2/PTK2/ABHD2/CALCOCO1/MDM2/STAT1/PRKAR1A/RAP1B/LGR4/ATP6V1A/BBS2/RAB10/UBA5/ARNTL",24
GO:0007229,"GO:0007229","integrin-mediated signaling pathway","5/473","77/11852",0.193293512974517,0.193293512974517,0.927453163534563,"ILK/VAV3/FUT8/NRP1/PTK2",5
GO:0045069,"GO:0045069","regulation of viral genome replication","5/473","77/11852",0.193293512974517,0.193293512974517,0.927453163534563,"EIF2AK4/MAVS/EIF2AK2/TRIM6/VAPA",5
GO:0072009,"GO:0072009","nephron epithelium development","5/473","77/11852",0.193293512974517,0.193293512974517,0.927453163534563,"ILK/PBX1/SMAD4/STAT1/LGR4",5
GO:0051222,"GO:0051222","positive regulation of protein transport","15/473","293/11852",0.194357765424271,0.194357765424271,0.927453163534563,"MYO18A/FRMD8/TSG101/F2R/RUFY3/FYN/GOLPH3L/MAVS/SORL1/MDM2/SOX4/TRIM6/RHOU/ARF6/CD58",15
GO:0016049,"GO:0016049","cell growth","18/473","361/11852",0.195747504271529,0.195747504271529,0.927453163534563,"APBB2/HDAC6/ILK/SMAD4/CDKL5/FLRT3/EIF2AK4/TSG101/RUFY3/SMARCA2/MAP3K13/NRP1/TGFBR2/MTPN/CDKN2C/CDKN1B/CDKN2AIP/SEMA3A",18
GO:1902807,"GO:1902807","negative regulation of cell cycle G1/S phase transition","6/473","98/11852",0.19696647839045,0.19696647839045,0.927453163534563,"KANK2/CDC25C/MDM2/SOX4/CDKN2C/CDKN1B",6
GO:0003205,"GO:0003205","cardiac chamber development","7/473","119/11852",0.197658550688004,0.197658550688004,0.927453163534563,"FKBP1A/SMAD4/NRP1/TGFBR2/MDM2/SOX4/ZMPSTE24",7
GO:0042770,"GO:0042770","signal transduction in response to DNA damage","7/473","119/11852",0.197658550688004,0.197658550688004,0.927453163534563,"CDC25C/ABRAXAS1/CDC14B/MDM2/SOX4/CDKN1B/ZMPSTE24",7
GO:0006497,"GO:0006497","protein lipidation","5/473","78/11852",0.200309632651096,0.200309632651096,0.927453163534563,"WIPI1/PIGB/ABHD17C/ZDHHC21/PIGM",5
GO:0032418,"GO:0032418","lysosome localization","4/473","58/11852",0.200371032276015,0.200371032276015,0.927453163534563,"HDAC6/PIK3CG/STXBP1/SNAP23",4
GO:0051865,"GO:0051865","protein autoubiquitination","4/473","58/11852",0.200371032276015,0.200371032276015,0.927453163534563,"MDM2/RNF11/RNFT1/RNF141",4
GO:0061333,"GO:0061333","renal tubule morphogenesis","4/473","58/11852",0.200371032276015,0.200371032276015,0.927453163534563,"ILK/PBX1/SMAD4/LGR4",4
GO:0010389,"GO:0010389","regulation of G2/M transition of mitotic cell cycle","10/473","184/11852",0.200675033774212,0.200675033774212,0.927453163534563,"PBX1/CDC25B/CDC25C/HMMR/MTA3/TPX2/ZFYVE19/NEK2/PSMD5/CEP57",10
GO:0071103,"GO:0071103","DNA conformation change","12/473","228/11852",0.200951928286026,0.200951928286026,0.927453163534563,"SMC4/HJURP/PURA/CUL4B/KAT6B/CENPW/XPA/NCAPG/ASF1A/CENPK/CENPI/GTF2H5",12
GO:0007596,"GO:0007596","blood coagulation","11/473","206/11852",0.201146716614123,0.201146716614123,0.927453163534563,"ILK/VAV3/F2R/PIK3CG/PLAT/FYN/GNAQ/STXBP1/CARMIL1/PRKAR1A/C1GALT1C1",11
GO:0010921,"GO:0010921","regulation of phosphatase activity","8/473","141/11852",0.201770065814192,0.201770065814192,0.927453163534563,"FKBP1A/RCAN3/DLG3/EIF2AK2/PPP2R5A/CALM2/CALM1/PPP2R5C",8
GO:0030308,"GO:0030308","negative regulation of cell growth","8/473","141/11852",0.201770065814192,0.201770065814192,0.927453163534563,"APBB2/SMAD4/SMARCA2/NRP1/CDKN2C/CDKN1B/CDKN2AIP/SEMA3A",8
GO:0031345,"GO:0031345","negative regulation of cell projection organization","8/473","141/11852",0.201770065814192,0.201770065814192,0.927453163534563,"RUFY3/FYN/NRP1/PTK2/ODF2L/MDM2/ARF6/SEMA3A",8
GO:0008631,"GO:0008631","intrinsic apoptotic signaling pathway in response to oxidative stress","3/473","39/11852",0.20286788927363,0.20286788927363,0.927453163534563,"CYP1B1/ARL6IP5/MELK",3
GO:0035088,"GO:0035088","establishment or maintenance of apical/basal cell polarity","3/473","39/11852",0.20286788927363,0.20286788927363,0.927453163534563,"ILK/DLG3/PDCD6IP",3
GO:0060038,"GO:0060038","cardiac muscle cell proliferation","3/473","39/11852",0.20286788927363,0.20286788927363,0.927453163534563,"JARID2/TGFBR2/PRKAR1A",3
GO:0061245,"GO:0061245","establishment or maintenance of bipolar cell polarity","3/473","39/11852",0.20286788927363,0.20286788927363,0.927453163534563,"ILK/DLG3/PDCD6IP",3
GO:0016202,"GO:0016202","regulation of striated muscle tissue development","6/473","99/11852",0.203191185416321,0.203191185416321,0.927453163534563,"SMAD4/USP19/JARID2/TGFBR2/MTPN/ARNTL",6
GO:0002053,"GO:0002053","positive regulation of mesenchymal cell proliferation","2/473","21/11852",0.203624921003023,0.203624921003023,0.927453163534563,"TGFBR2/STAT1",2
GO:0009251,"GO:0009251","glucan catabolic process","2/473","21/11852",0.203624921003023,0.203624921003023,0.927453163534563,"PGM2L1/CALM1",2
GO:0010614,"GO:0010614","negative regulation of cardiac muscle hypertrophy","2/473","21/11852",0.203624921003023,0.203624921003023,0.927453163534563,"SMAD4/JARID2",2
GO:0014741,"GO:0014741","negative regulation of muscle hypertrophy","2/473","21/11852",0.203624921003023,0.203624921003023,0.927453163534563,"SMAD4/JARID2",2
GO:0030513,"GO:0030513","positive regulation of BMP signaling pathway","2/473","21/11852",0.203624921003023,0.203624921003023,0.927453163534563,"ILK/SMAD4",2
GO:0031338,"GO:0031338","regulation of vesicle fusion","2/473","21/11852",0.203624921003023,0.203624921003023,0.927453163534563,"STXBP6/STXBP1",2
GO:0032607,"GO:0032607","interferon-alpha production","2/473","21/11852",0.203624921003023,0.203624921003023,0.927453163534563,"MAVS/STAT1",2
GO:0032878,"GO:0032878","regulation of establishment or maintenance of cell polarity","2/473","21/11852",0.203624921003023,0.203624921003023,0.927453163534563,"RUFY3/RAP1B",2
GO:0033762,"GO:0033762","response to glucagon","2/473","21/11852",0.203624921003023,0.203624921003023,0.927453163534563,"ADCY7/PRKAR1A",2
GO:0042572,"GO:0042572","retinol metabolic process","2/473","21/11852",0.203624921003023,0.203624921003023,0.927453163534563,"SDR16C5/CYP1B1",2
GO:0043552,"GO:0043552","positive regulation of phosphatidylinositol 3-kinase activity","2/473","21/11852",0.203624921003023,0.203624921003023,0.927453163534563,"VAV3/PTK2",2
GO:0048103,"GO:0048103","somatic stem cell division","2/473","21/11852",0.203624921003023,0.203624921003023,0.927453163534563,"ASPM/RAB10",2
GO:0070306,"GO:0070306","lens fiber cell differentiation","2/473","21/11852",0.203624921003023,0.203624921003023,0.927453163534563,"KDM5B/CDKN1B",2
GO:0071295,"GO:0071295","cellular response to vitamin","2/473","21/11852",0.203624921003023,0.203624921003023,0.927453163534563,"KANK2/MDM2",2
GO:0071459,"GO:0071459","protein localization to chromosome, centromeric region","2/473","21/11852",0.203624921003023,0.203624921003023,0.927453163534563,"TTK/NDC80",2
GO:0090050,"GO:0090050","positive regulation of cell migration involved in sprouting angiogenesis","2/473","21/11852",0.203624921003023,0.203624921003023,0.927453163534563,"MAP3K3/NRP1",2
GO:1904666,"GO:1904666","regulation of ubiquitin protein ligase activity","2/473","21/11852",0.203624921003023,0.203624921003023,0.927453163534563,"GOLGA2/CDC14B",2
GO:0022406,"GO:0022406","membrane docking","9/473","163/11852",0.204090555787041,0.204090555787041,0.927453163534563,"C2CD3/STXBP1/EXOC6B/STX2/NEK2/STX7/RALB/RAB10/CEP57",9
GO:0045861,"GO:0045861","negative regulation of proteolysis","11/473","207/11852",0.205402198547421,0.205402198547421,0.927453163534563,"SERPINB9/HDAC6/USP19/PLAT/RFFL/SORL1/MDM2/ERLEC1/TMEM59/GABARAPL2/PBK",11
GO:0050817,"GO:0050817","coagulation","11/473","207/11852",0.205402198547421,0.205402198547421,0.927453163534563,"ILK/VAV3/F2R/PIK3CG/PLAT/FYN/GNAQ/STXBP1/CARMIL1/PRKAR1A/C1GALT1C1",11
GO:0010639,"GO:0010639","negative regulation of organelle organization","16/473","319/11852",0.206444639024057,0.206444639024057,0.927453163534563,"HDAC6/SMAD4/PHLDB2/SDR16C5/CARMIL1/JARID2/ODF2L/GMFB/NEK2/MTPN/PRKAR1A/ASF1A/TTK/BUB1/NDC80/OMA1",16
GO:0048732,"GO:0048732","gland development","16/473","319/11852",0.206444639024057,0.206444639024057,0.927453163534563,"PBX1/SMAD4/KDM5B/CCNB2/ZDHHC21/IQGAP3/IGSF3/CIT/JARID2/NRP1/EDAR/TGFBR2/ARF6/CDKN1B/ZMPSTE24/SEMA3A",16
GO:1903076,"GO:1903076","regulation of protein localization to plasma membrane","5/473","79/11852",0.207411046470536,0.207411046470536,0.927453163534563,"SORBS1/PPP2R5A/STX7/TMEM59/ARF6",5
GO:0005977,"GO:0005977","glycogen metabolic process","4/473","59/11852",0.208713837501798,0.208713837501798,0.927453163534563,"SORBS1/PGM2L1/EPM2AIP1/CALM1",4
GO:0060047,"GO:0060047","heart contraction","9/473","164/11852",0.208937385860789,0.208937385860789,0.927453163534563,"PIK3CG/PDE5A/DSC2/MDM2/TMEM38B/CALM2/CALM1/ZMPSTE24/SEMA3A",9
GO:0043901,"GO:0043901","negative regulation of multi-organism process","7/473","121/11852",0.208965336516594,0.208965336516594,0.927453163534563,"EIF2AK4/TRIM5/MAVS/EIF2AK2/STAT1/TRIM6/VAPA",7
GO:0048634,"GO:0048634","regulation of muscle organ development","6/473","100/11852",0.209486501873236,0.209486501873236,0.927453163534563,"SMAD4/USP19/JARID2/TGFBR2/MTPN/ARNTL",6
GO:0072073,"GO:0072073","kidney epithelium development","6/473","100/11852",0.209486501873236,0.209486501873236,0.927453163534563,"ILK/PBX1/KANK2/SMAD4/STAT1/LGR4",6
GO:1901861,"GO:1901861","regulation of muscle tissue development","6/473","100/11852",0.209486501873236,0.209486501873236,0.927453163534563,"SMAD4/USP19/JARID2/TGFBR2/MTPN/ARNTL",6
GO:0007599,"GO:0007599","hemostasis","11/473","208/11852",0.209696294082306,0.209696294082306,0.927453163534563,"ILK/VAV3/F2R/PIK3CG/PLAT/FYN/GNAQ/STXBP1/CARMIL1/PRKAR1A/C1GALT1C1",11
GO:0070085,"GO:0070085","glycosylation","11/473","208/11852",0.209696294082306,0.209696294082306,0.927453163534563,"GOLGA2/PIGB/FUT8/B4GAT1/B3GALT4/TMEM59/DPY19L4/C1GALT1C1/ALG6/MAN1A1/DPY19L1",11
GO:0032970,"GO:0032970","regulation of actin filament-based process","15/473","298/11852",0.212048521078307,0.212048521078307,0.927453163534563,"ILK/SMAD4/PHLDB2/DSC2/CARMIL1/CIT/NRP1/RHOBTB1/GMFB/MTPN/ABRACL/RHOBTB3/DIXDC1/RHOU/ARF6",15
GO:0006475,"GO:0006475","internal protein amino acid acetylation","8/473","143/11852",0.21221876302754,0.21221876302754,0.927453163534563,"SMAD4/SDR16C5/NCOA3/KAT6B/EHHADH/YEATS4/EID1/ZMPSTE24",8
GO:0002720,"GO:0002720","positive regulation of cytokine production involved in immune response","3/473","40/11852",0.213314985943643,0.213314985943643,0.927453163534563,"MAVS/TRIM6/IL18",3
GO:0033048,"GO:0033048","negative regulation of mitotic sister chromatid segregation","3/473","40/11852",0.213314985943643,0.213314985943643,0.927453163534563,"TTK/BUB1/NDC80",3
GO:0035196,"GO:0035196","production of miRNAs involved in gene silencing by miRNA","3/473","40/11852",0.213314985943643,0.213314985943643,0.927453163534563,"NCOR1/AGO4/ZMPSTE24",3
GO:0050891,"GO:0050891","multicellular organismal water homeostasis","3/473","40/11852",0.213314985943643,0.213314985943643,0.927453163534563,"ADCY7/AQP3/PRKAR1A",3
GO:0060389,"GO:0060389","pathway-restricted SMAD protein phosphorylation","3/473","40/11852",0.213314985943643,0.213314985943643,0.927453163534563,"SMAD4/TGFBR2/TTK",3
GO:0070527,"GO:0070527","platelet aggregation","3/473","40/11852",0.213314985943643,0.213314985943643,0.927453163534563,"ILK/PIK3CG/STXBP1",3
GO:0042158,"GO:0042158","lipoprotein biosynthetic process","5/473","80/11852",0.214593851391481,0.214593851391481,0.927453163534563,"WIPI1/PIGB/ABHD17C/ZDHHC21/PIGM",5
GO:0045446,"GO:0045446","endothelial cell differentiation","5/473","80/11852",0.214593851391481,0.214593851391481,0.927453163534563,"SMAD4/TJP2/VEZF1/NRP1/RAP1B",5
GO:0002831,"GO:0002831","regulation of response to biotic stimulus","6/473","101/11852",0.215849821551525,0.215849821551525,0.927453163534563,"EIF2AK4/TRIM5/MAVS/STAT1/TRIM6/ZMPSTE24",6
GO:0007601,"GO:0007601","visual perception","6/473","101/11852",0.215849821551525,0.215849821551525,0.927453163534563,"BBS2/CYP1B1/BBS10/BBS9/CRYZ/DRAM2",6
GO:0030856,"GO:0030856","regulation of epithelial cell differentiation","6/473","101/11852",0.215849821551525,0.215849821551525,0.927453163534563,"VEZF1/NCOA3/AQP3/STAT1/ARNTL/CDKN1B",6
GO:0031398,"GO:0031398","positive regulation of protein ubiquitination","6/473","101/11852",0.215849821551525,0.215849821551525,0.927453163534563,"FKBP1A/GOLGA2/CDC14B/UBE2D1/NDFIP1/BMI1",6
GO:0006073,"GO:0006073","cellular glucan metabolic process","4/473","60/11852",0.217154016385502,0.217154016385502,0.927453163534563,"SORBS1/PGM2L1/EPM2AIP1/CALM1",4
GO:0016239,"GO:0016239","positive regulation of macroautophagy","4/473","60/11852",0.217154016385502,0.217154016385502,0.927453163534563,"HDAC6/PAFAH1B2/RALB/SCOC",4
GO:0031571,"GO:0031571","mitotic G1 DNA damage checkpoint","4/473","60/11852",0.217154016385502,0.217154016385502,0.927453163534563,"CDC25C/MDM2/SOX4/CDKN1B",4
GO:0044042,"GO:0044042","glucan metabolic process","4/473","60/11852",0.217154016385502,0.217154016385502,0.927453163534563,"SORBS1/PGM2L1/EPM2AIP1/CALM1",4
GO:0044819,"GO:0044819","mitotic G1/S transition checkpoint","4/473","60/11852",0.217154016385502,0.217154016385502,0.927453163534563,"CDC25C/MDM2/SOX4/CDKN1B",4
GO:0050848,"GO:0050848","regulation of calcium-mediated signaling","4/473","60/11852",0.217154016385502,0.217154016385502,0.927453163534563,"FKBP1A/RCAN3/CALM2/CALM1",4
GO:0019932,"GO:0019932","second-messenger-mediated signaling","12/473","232/11852",0.217303713045704,0.217303713045704,0.927453163534563,"FKBP1A/ADCY7/RCAN3/PDE5A/GNAQ/TMEM38B/PRKAR1A/LGR4/CALM2/CALM1/GNAI1/ZMPSTE24",12
GO:0090066,"GO:0090066","regulation of anatomical structure size","18/473","368/11852",0.218243495231077,0.218243495231077,0.927453163534563,"ILK/CDKL5/KCNMB4/VAV3/F2R/IQGAP3/RUFY3/MAP3K13/CARMIL1/CIT/NRP1/RHOBTB1/GMFB/MTPN/CLCN3/BBS2/ARF6/SEMA3A",18
GO:0000272,"GO:0000272","polysaccharide catabolic process","2/473","22/11852",0.218446763140045,0.218446763140045,0.927453163534563,"PGM2L1/CALM1",2
GO:0001539,"GO:0001539","cilium or flagellum-dependent cell motility","2/473","22/11852",0.218446763140045,0.218446763140045,0.927453163534563,"GAS8/BBS2",2
GO:0002888,"GO:0002888","positive regulation of myeloid leukocyte mediated immunity","2/473","22/11852",0.218446763140045,0.218446763140045,0.927453163534563,"STXBP1/MAVS",2
GO:0014047,"GO:0014047","glutamate secretion","2/473","22/11852",0.218446763140045,0.218446763140045,0.927453163534563,"SLC38A2/STXBP1",2
GO:0018126,"GO:0018126","protein hydroxylation","2/473","22/11852",0.218446763140045,0.218446763140045,0.927453163534563,"P4HA2/P4HA1",2
GO:0031935,"GO:0031935","regulation of chromatin silencing","2/473","22/11852",0.218446763140045,0.218446763140045,0.927453163534563,"ATF7IP/ASF1A",2
GO:0034629,"GO:0034629","cellular protein-containing complex localization","2/473","22/11852",0.218446763140045,0.218446763140045,0.927453163534563,"STXBP6/RALB",2
GO:0043162,"GO:0043162","ubiquitin-dependent protein catabolic process via the multivesicular body sorting pathway","2/473","22/11852",0.218446763140045,0.218446763140045,0.927453163534563,"HDAC6/TSG101",2
GO:0044060,"GO:0044060","regulation of endocrine process","2/473","22/11852",0.218446763140045,0.218446763140045,0.927453163534563,"SMAD4/F2R",2
GO:0044247,"GO:0044247","cellular polysaccharide catabolic process","2/473","22/11852",0.218446763140045,0.218446763140045,0.927453163534563,"PGM2L1/CALM1",2
GO:0046633,"GO:0046633","alpha-beta T cell proliferation","2/473","22/11852",0.218446763140045,0.218446763140045,0.927453163534563,"TGFBR2/IL18",2
GO:0048843,"GO:0048843","negative regulation of axon extension involved in axon guidance","2/473","22/11852",0.218446763140045,0.218446763140045,0.927453163534563,"NRP1/SEMA3A",2
GO:0060285,"GO:0060285","cilium-dependent cell motility","2/473","22/11852",0.218446763140045,0.218446763140045,0.927453163534563,"GAS8/BBS2",2
GO:1904376,"GO:1904376","negative regulation of protein localization to cell periphery","2/473","22/11852",0.218446763140045,0.218446763140045,0.927453163534563,"PPP2R5A/TMEM59",2
GO:0044089,"GO:0044089","positive regulation of cellular component biogenesis","20/473","414/11852",0.218608192785502,0.218608192785502,0.927453163534563,"HDAC6/BIK/FLRT3/ZMYND8/PHLDB2/GPSM2/TSG101/TPPP/SPAG5/CUL4B/PDCD6IP/CARMIL1/NRP1/RHOBTB1/GMFB/XPA/RALB/GTF2H5/ARF6/CDKN1B",20
GO:0019827,"GO:0019827","stem cell population maintenance","7/473","123/11852",0.220508029954202,0.220508029954202,0.927453163534563,"PBX1/MED14/SMAD4/ASPM/NCOA3/HOOK3/SOX4",7
GO:0006633,"GO:0006633","fatty acid biosynthetic process","6/473","102/11852",0.222278506365789,0.222278506365789,0.927453163534563,"ACSS2/PDK4/ABHD2/CBR1/ABHD3/PNPLA8",6
GO:0006766,"GO:0006766","vitamin metabolic process","6/473","102/11852",0.222278506365789,0.222278506365789,0.927453163534563,"ABCD4/TPK1/CBR3/CBR1/MMADHC/MTHFD2L",6
GO:1901568,"GO:1901568","fatty acid derivative metabolic process","6/473","102/11852",0.222278506365789,0.222278506365789,0.927453163534563,"ACOX1/ZADH2/FAAH2/CBR1/CYP1B1/PNPLA8",6
GO:1901991,"GO:1901991","negative regulation of mitotic cell cycle phase transition","11/473","211/11852",0.22280296703033,0.22280296703033,0.927453163534563,"KANK2/CDC25C/ZFYVE19/MDM2/SOX4/TTK/BUB1/PSMD5/NDC80/CDKN2C/CDKN1B",11
GO:0032535,"GO:0032535","regulation of cellular component size","15/473","301/11852",0.222998262264987,0.222998262264987,0.927453163534563,"ILK/CDKL5/VAV3/IQGAP3/RUFY3/MAP3K13/CARMIL1/CIT/NRP1/RHOBTB1/GMFB/MTPN/CLCN3/ARF6/SEMA3A",15
GO:0046324,"GO:0046324","regulation of glucose import","3/473","41/11852",0.223874360926381,0.223874360926381,0.927453163534563,"SORBS1/RTN2/CREBL2",3
GO:0098927,"GO:0098927","vesicle-mediated transport between endosomal compartments","3/473","41/11852",0.223874360926381,0.223874360926381,0.927453163534563,"AKTIP/HOOK3/SORL1",3
GO:0034766,"GO:0034766","negative regulation of ion transmembrane transport","4/473","61/11852",0.225685058439007,0.225685058439007,0.927453163534563,"THADA/CALM2/ARL6IP5/CALM1",4
GO:0044783,"GO:0044783","G1 DNA damage checkpoint","4/473","61/11852",0.225685058439007,0.225685058439007,0.927453163534563,"CDC25C/MDM2/SOX4/CDKN1B",4
GO:0098727,"GO:0098727","maintenance of cell number","7/473","124/11852",0.226363104593094,0.226363104593094,0.927453163534563,"PBX1/MED14/SMAD4/ASPM/NCOA3/HOOK3/SOX4",7
GO:0034249,"GO:0034249","negative regulation of cellular amide metabolic process","8/473","146/11852",0.228270670171283,0.228270670171283,0.927453163534563,"EIF2AK4/AGO4/PURA/EIF2AK2/SORL1/PAIP2B/PAIP2/C8orf88",8
GO:0006333,"GO:0006333","chromatin assembly or disassembly","6/473","103/11852",0.228769890245984,0.228769890245984,0.927453163534563,"HJURP/KAT6B/CENPW/ASF1A/CENPK/CENPI",6
GO:0061351,"GO:0061351","neural precursor cell proliferation","6/473","103/11852",0.228769890245984,0.228769890245984,0.927453163534563,"ILK/ASPM/HOOK3/DIXDC1/RAB10/MELK",6
GO:0003279,"GO:0003279","cardiac septum development","5/473","82/11852",0.229187880103596,0.229187880103596,0.927453163534563,"SMAD4/NRP1/TGFBR2/MDM2/SOX4",5
GO:0051651,"GO:0051651","maintenance of location in cell","5/473","82/11852",0.229187880103596,0.229187880103596,0.927453163534563,"GPSM2/ASPM/ARL2BP/CLMN/SORL1",5
GO:1990823,"GO:1990823","response to leukemia inhibitory factor","5/473","82/11852",0.229187880103596,0.229187880103596,0.927453163534563,"ABCD4/KDM5B/KAT6B/JARID2/SNX10",5
GO:1990830,"GO:1990830","cellular response to leukemia inhibitory factor","5/473","82/11852",0.229187880103596,0.229187880103596,0.927453163534563,"ABCD4/KDM5B/KAT6B/JARID2/SNX10",5
GO:0031023,"GO:0031023","microtubule organizing center organization","7/473","125/11852",0.232271420106537,0.232271420106537,0.927453163534563,"GOLGA2/C2CD3/CEP68/PDCD6IP/NEK2/CETN3/CHMP1B",7
GO:0099504,"GO:0099504","synaptic vesicle cycle","7/473","125/11852",0.232271420106537,0.232271420106537,0.927453163534563,"STXBP1/STX2/RAP1B/CLCN3/SNAP23/VAMP4/ARF6",7
GO:0000209,"GO:0000209","protein polyubiquitination","14/473","281/11852",0.233259731156633,0.233259731156633,0.927453163534563,"HDAC6/MIB2/TRIM5/DZIP3/FBXL5/UBE2H/TRIM69/RFFL/HACE1/UBE2D1/TRIM6/PSMD5/UBE2Q2/TRIM2",14
GO:0000578,"GO:0000578","embryonic axis specification","2/473","23/11852",0.233356189160885,0.233356189160885,0.927453163534563,"C2CD3/SMAD4",2
GO:0000715,"GO:0000715","nucleotide-excision repair, DNA damage recognition","2/473","23/11852",0.233356189160885,0.233356189160885,0.927453163534563,"CUL4B/XPA",2
GO:0006730,"GO:0006730","one-carbon metabolic process","2/473","23/11852",0.233356189160885,0.233356189160885,0.927453163534563,"MTHFD2L/MAT2B",2
GO:0007129,"GO:0007129","synapsis","2/473","23/11852",0.233356189160885,0.233356189160885,0.927453163534563,"AGO4/MLH3",2
GO:0008535,"GO:0008535","respiratory chain complex IV assembly","2/473","23/11852",0.233356189160885,0.233356189160885,0.927453163534563,"COA6/COX20",2
GO:0009187,"GO:0009187","cyclic nucleotide metabolic process","2/473","23/11852",0.233356189160885,0.233356189160885,0.927453163534563,"ADCY7/PDE5A",2
GO:0009649,"GO:0009649","entrainment of circadian clock","2/473","23/11852",0.233356189160885,0.233356189160885,0.927453163534563,"GNAQ/ARNTL2",2
GO:0010922,"GO:0010922","positive regulation of phosphatase activity","2/473","23/11852",0.233356189160885,0.233356189160885,0.927453163534563,"CALM2/CALM1",2
GO:0031954,"GO:0031954","positive regulation of protein autophosphorylation","2/473","23/11852",0.233356189160885,0.233356189160885,0.927453163534563,"CALM2/CALM1",2
GO:0042634,"GO:0042634","regulation of hair cycle","2/473","23/11852",0.233356189160885,0.233356189160885,0.927453163534563,"SMAD4/ARNTL",2
GO:0044788,"GO:0044788","modulation by host of viral process","2/473","23/11852",0.233356189160885,0.233356189160885,0.927453163534563,"EIF2AK4/VAPA",2
GO:0050690,"GO:0050690","regulation of defense response to virus by virus","2/473","23/11852",0.233356189160885,0.233356189160885,0.927453163534563,"FYN/EIF2AK2",2
GO:0051491,"GO:0051491","positive regulation of filopodium assembly","2/473","23/11852",0.233356189160885,0.233356189160885,0.927453163534563,"ZMYND8/NRP1",2
GO:0070861,"GO:0070861","regulation of protein exit from endoplasmic reticulum","2/473","23/11852",0.233356189160885,0.233356189160885,0.927453163534563,"SORL1/ERLEC1",2
GO:0071218,"GO:0071218","cellular response to misfolded protein","2/473","23/11852",0.233356189160885,0.233356189160885,0.927453163534563,"HDAC6/ATXN3",2
GO:1902668,"GO:1902668","negative regulation of axon guidance","2/473","23/11852",0.233356189160885,0.233356189160885,0.927453163534563,"NRP1/SEMA3A",2
GO:2000516,"GO:2000516","positive regulation of CD4-positive, alpha-beta T cell activation","2/473","23/11852",0.233356189160885,0.233356189160885,0.927453163534563,"TGFBR2/IL18",2
GO:0018394,"GO:0018394","peptidyl-lysine acetylation","8/473","147/11852",0.233716526735627,0.233716526735627,0.927453163534563,"SMAD4/SDR16C5/NCOA3/KAT6B/SOX4/YEATS4/EID1/ZMPSTE24",8
GO:0050821,"GO:0050821","protein stabilization","8/473","147/11852",0.233716526735627,0.233716526735627,0.927453163534563,"USP19/AAK1/GNAQ/STXBP1/ATF7IP/SOX4/SUGT1/CREBL2",8
GO:0071478,"GO:0071478","cellular response to radiation","8/473","147/11852",0.233716526735627,0.233716526735627,0.927453163534563,"EIF2AK4/CUL4B/XPA/MDM2/CALM1/GTF2H5/ZMPSTE24/PBK",8
GO:0006625,"GO:0006625","protein targeting to peroxisome","4/473","62/11852",0.234300478069287,0.234300478069287,0.927453163534563,"ACOX1/EHHADH/UBE2D1/PEX1",4
GO:0072662,"GO:0072662","protein localization to peroxisome","4/473","62/11852",0.234300478069287,0.234300478069287,0.927453163534563,"ACOX1/EHHADH/UBE2D1/PEX1",4
GO:0072663,"GO:0072663","establishment of protein localization to peroxisome","4/473","62/11852",0.234300478069287,0.234300478069287,0.927453163534563,"ACOX1/EHHADH/UBE2D1/PEX1",4
GO:1903725,"GO:1903725","regulation of phospholipid metabolic process","4/473","62/11852",0.234300478069287,0.234300478069287,0.927453163534563,"SOCS6/VAV3/LDLR/PTK2",4
GO:0021872,"GO:0021872","forebrain generation of neurons","3/473","42/11852",0.234533500361476,0.234533500361476,0.927453163534563,"ASPM/NRP1/SEMA3A",3
GO:0022029,"GO:0022029","telencephalon cell migration","3/473","42/11852",0.234533500361476,0.234533500361476,0.927453163534563,"NRP1/DIXDC1/SEMA3A",3
GO:0030104,"GO:0030104","water homeostasis","3/473","42/11852",0.234533500361476,0.234533500361476,0.927453163534563,"ADCY7/AQP3/PRKAR1A",3
GO:0032413,"GO:0032413","negative regulation of ion transmembrane transporter activity","3/473","42/11852",0.234533500361476,0.234533500361476,0.927453163534563,"THADA/CALM2/CALM1",3
GO:0033046,"GO:0033046","negative regulation of sister chromatid segregation","3/473","42/11852",0.234533500361476,0.234533500361476,0.927453163534563,"TTK/BUB1/NDC80",3
GO:0051985,"GO:0051985","negative regulation of chromosome segregation","3/473","42/11852",0.234533500361476,0.234533500361476,0.927453163534563,"TTK/BUB1/NDC80",3
GO:1900024,"GO:1900024","regulation of substrate adhesion-dependent cell spreading","3/473","42/11852",0.234533500361476,0.234533500361476,0.927453163534563,"CARMIL1/NRP1/PTK2",3
GO:1905268,"GO:1905268","negative regulation of chromatin organization","3/473","42/11852",0.234533500361476,0.234533500361476,0.927453163534563,"SDR16C5/JARID2/ASF1A",3
GO:0043410,"GO:0043410","positive regulation of MAPK cascade","17/473","350/11852",0.234994985049474,0.234994985049474,0.927453163534563,"MADD/ILK/MAP3K3/TRIM5/F2R/PIK3CG/PDE5A/IQGAP3/MAP3K13/TNIK/EIF2AK2/NRP1/EDAR/RAP1B/ARL6IP5/MDFIC/SEMA3A",17
GO:0010508,"GO:0010508","positive regulation of autophagy","6/473","104/11852",0.235321282958906,0.235321282958906,0.927453163534563,"HDAC6/EIF2AK4/PAFAH1B2/TMEM59/RALB/SCOC",6
GO:0050953,"GO:0050953","sensory perception of light stimulus","6/473","104/11852",0.235321282958906,0.235321282958906,0.927453163534563,"BBS2/CYP1B1/BBS10/BBS9/CRYZ/DRAM2",6
GO:0051047,"GO:0051047","positive regulation of secretion","13/473","259/11852",0.235965589861882,0.235965589861882,0.927453163534563,"MYO18A/SMAD4/FRMD8/TSG101/F2R/GOLPH3L/STXBP1/MAVS/PDCD6IP/SOX4/TRIM6/ARF6/CD58",13
GO:0072521,"GO:0072521","purine-containing compound metabolic process","22/473","466/11852",0.236256011667507,0.236256011667507,0.927453163534563,"ACOT13/NCOR1/ACSS2/ADCY7/TJP2/PDK4/PDE5A/PGM2L1/MOCS2/CARMIL1/SAMHD1/DCAKD/COX7C/COA6/NDUFB6/PRTFDC1/PDP1/ATP6V1A/MTHFD2L/NDUFC2/NME7/PPCS",22
GO:0007286,"GO:0007286","spermatid development","5/473","83/11852",0.23659117609131,0.23659117609131,0.927453163534563,"SMARCA2/ABHD2/ICA1L/BBS2/CEP57",5
GO:1901222,"GO:1901222","regulation of NIK/NF-kappaB signaling","5/473","83/11852",0.23659117609131,0.23659117609131,0.927453163534563,"ILK/EIF2AK2/EDAR/IL18/RTKN2",5
GO:0051098,"GO:0051098","regulation of binding","15/473","305/11852",0.237966275860264,0.237966275860264,0.927453163534563,"FKBP1A/GOLGA2/SMAD4/EPB41/HJURP/AKTIP/MBD2/GAS8/SORL1/NRP1/NEK2/RALB/TRIM6/ARF6/ZMPSTE24",15
GO:0098742,"GO:0098742","cell-cell adhesion via plasma-membrane adhesion molecules","7/473","126/11852",0.23823101534113,0.23823101534113,0.927453163534563,"FLRT3/DSC2/TGFBR2/MPZL2/KIFAP3/CLDN23/CD164",7
GO:0051046,"GO:0051046","regulation of secretion","23/473","490/11852",0.238395933204396,0.238395933204396,0.927453163534563,"MYO18A/DPP4/SMAD4/FRMD8/STXBP6/KDM5B/KCNMB4/TSG101/F2R/ARL2BP/GOLPH3L/STXBP1/MAVS/PDCD6IP/RAP1B/LGR4/SOX4/RALB/TRIM6/RAB10/ARNTL/ARF6/CD58",23
GO:0071375,"GO:0071375","cellular response to peptide hormone stimulus","12/473","237/11852",0.238495185474993,0.238495185474993,0.927453163534563,"ADCY7/PDK4/SORBS1/FYN/SORL1/PTK2/MDM2/STAT1/PRKAR1A/RAP1B/ATP6V1A/RAB10",12
GO:1904951,"GO:1904951","positive regulation of establishment of protein localization","16/473","329/11852",0.24206048330917,0.24206048330917,0.927453163534563,"MYO18A/FRMD8/TSG101/F2R/RUFY3/FYN/CASP8/GOLPH3L/MAVS/SORL1/MDM2/SOX4/TRIM6/RHOU/ARF6/CD58",16
GO:0043588,"GO:0043588","skin development","10/473","193/11852",0.242693840208095,0.242693840208095,0.927453163534563,"SMAD4/EVPL/ZDHHC21/TSG101/DSC2/NCOA3/EDAR/AQP3/LGR4/ZMPSTE24",10
GO:0071824,"GO:0071824","protein-DNA complex subunit organization","10/473","193/11852",0.242693840208095,0.242693840208095,0.927453163534563,"HJURP/CUL4B/KAT6B/ATF7IP/CENPW/XPA/ASF1A/CENPK/CENPI/GTF2H5",10
GO:0048638,"GO:0048638","regulation of developmental growth","12/473","238/11852",0.242827172877161,0.242827172877161,0.927453163534563,"ILK/CDKL5/RUFY3/MAP3K13/JARID2/NRP1/TGFBR2/PTK2/BBS2/CDKN1B/ZMPSTE24/SEMA3A",12
GO:0043574,"GO:0043574","peroxisomal transport","4/473","63/11852",0.242993826740716,0.242993826740716,0.927453163534563,"ACOX1/EHHADH/UBE2D1/PEX1",4
GO:0055072,"GO:0055072","iron ion homeostasis","4/473","63/11852",0.242993826740716,0.242993826740716,0.927453163534563,"SMAD4/FBXL5/ATP6V1A/NDFIP1",4
GO:0000045,"GO:0000045","autophagosome assembly","5/473","84/11852",0.24406002073944,0.24406002073944,0.927453163534563,"WIPI1/GABARAPL1/RALB/VMP1/GABARAPL2",5
GO:0006865,"GO:0006865","amino acid transport","5/473","84/11852",0.24406002073944,0.24406002073944,0.927453163534563,"SLC17A5/SLC38A2/STXBP1/SLC38A6/ARL6IP5",5
GO:0002793,"GO:0002793","positive regulation of peptide secretion","9/473","171/11852",0.244097378696713,0.244097378696713,0.927453163534563,"MYO18A/FRMD8/F2R/GOLPH3L/MAVS/SOX4/TRIM6/ARF6/CD58",9
GO:1990778,"GO:1990778","protein localization to cell periphery","13/473","261/11852",0.244228300885813,0.244228300885813,0.927453163534563,"EPB41/GPSM2/SORBS1/GOLPH3L/STXBP1/TNIK/PPP2R5A/STX7/TMEM59/BBS2/RAB10/GNAI1/ARF6",13
GO:0009612,"GO:0009612","response to mechanical stimulus","8/473","149/11852",0.24474211486084,0.24474211486084,0.927453163534563,"SLC38A2/FYN/CASP8/MBD2/TGFBR2/XPA/STAT1/MTPN",8
GO:0051099,"GO:0051099","positive regulation of binding","8/473","149/11852",0.24474211486084,0.24474211486084,0.927453163534563,"FKBP1A/EPB41/AKTIP/MBD2/NRP1/RALB/TRIM6/ARF6",8
GO:1901215,"GO:1901215","negative regulation of neuron death","8/473","149/11852",0.24474211486084,0.24474211486084,0.927453163534563,"ILK/STAMBP/F2R/FYN/STXBP1/SORL1/NRP1/RETREG1",8
GO:1901653,"GO:1901653","cellular response to peptide","14/473","284/11852",0.245117973434837,0.245117973434837,0.927453163534563,"ADCY7/PDK4/SORBS1/FYN/KLF11/SORL1/KLF3/PTK2/MDM2/STAT1/PRKAR1A/RAP1B/ATP6V1A/RAB10",14
GO:0007080,"GO:0007080","mitotic metaphase plate congression","3/473","43/11852",0.245280187343159,0.245280187343159,0.927453163534563,"NUF2/NDC80/CHMP1B",3
GO:0031529,"GO:0031529","ruffle organization","3/473","43/11852",0.245280187343159,0.245280187343159,0.927453163534563,"CARMIL1/SNX10/ARF6",3
GO:0032677,"GO:0032677","regulation of interleukin-8 production","3/473","43/11852",0.245280187343159,0.245280187343159,0.927453163534563,"F2R/MAVS/CD58",3
GO:0051653,"GO:0051653","spindle localization","3/473","43/11852",0.245280187343159,0.245280187343159,0.927453163534563,"GPSM2/ASPM/NDC80",3
GO:0061512,"GO:0061512","protein localization to cilium","3/473","43/11852",0.245280187343159,0.245280187343159,0.927453163534563,"GAS8/SNX10/BBS9",3
GO:0090342,"GO:0090342","regulation of cell aging","3/473","43/11852",0.245280187343159,0.245280187343159,0.927453163534563,"MAP3K3/ARNTL/ZMPSTE24",3
GO:1901068,"GO:1901068","guanosine-containing compound metabolic process","3/473","43/11852",0.245280187343159,0.245280187343159,0.927453163534563,"TJP2/MOCS2/NME7",3
GO:1902041,"GO:1902041","regulation of extrinsic apoptotic signaling pathway via death domain receptors","3/473","43/11852",0.245280187343159,0.245280187343159,0.927453163534563,"MADD/CASP8/RFFL",3
GO:0001569,"GO:0001569","branching involved in blood vessel morphogenesis","2/473","24/11852",0.24832267751819,0.24832267751819,0.927453163534563,"NRP1/TGFBR2",2
GO:0003230,"GO:0003230","cardiac atrium development","2/473","24/11852",0.24832267751819,0.24832267751819,0.927453163534563,"MDM2/SOX4",2
GO:0005979,"GO:0005979","regulation of glycogen biosynthetic process","2/473","24/11852",0.24832267751819,0.24832267751819,0.927453163534563,"SORBS1/EPM2AIP1",2
GO:0007602,"GO:0007602","phototransduction","2/473","24/11852",0.24832267751819,0.24832267751819,0.927453163534563,"GNAQ/CALM1",2
GO:0010962,"GO:0010962","regulation of glucan biosynthetic process","2/473","24/11852",0.24832267751819,0.24832267751819,0.927453163534563,"SORBS1/EPM2AIP1",2
GO:0033280,"GO:0033280","response to vitamin D","2/473","24/11852",0.24832267751819,0.24832267751819,0.927453163534563,"KANK2/AQP3",2
GO:0033598,"GO:0033598","mammary gland epithelial cell proliferation","2/473","24/11852",0.24832267751819,0.24832267751819,0.927453163534563,"KDM5B/IQGAP3",2
GO:0034067,"GO:0034067","protein localization to Golgi apparatus","2/473","24/11852",0.24832267751819,0.24832267751819,0.927453163534563,"RAB6A/SORL1",2
GO:0034453,"GO:0034453","microtubule anchoring","2/473","24/11852",0.24832267751819,0.24832267751819,0.927453163534563,"HOOK3/CEP57",2
GO:0043403,"GO:0043403","skeletal muscle tissue regeneration","2/473","24/11852",0.24832267751819,0.24832267751819,0.927453163534563,"TGFBR2/MTPN",2
GO:0045920,"GO:0045920","negative regulation of exocytosis","2/473","24/11852",0.24832267751819,0.24832267751819,0.927453163534563,"STXBP6/RAP1B",2
GO:0050850,"GO:0050850","positive regulation of calcium-mediated signaling","2/473","24/11852",0.24832267751819,0.24832267751819,0.927453163534563,"CALM2/CALM1",2
GO:0060317,"GO:0060317","cardiac epithelial to mesenchymal transition","2/473","24/11852",0.24832267751819,0.24832267751819,0.927453163534563,"SMAD4/TGFBR2",2
GO:0060765,"GO:0060765","regulation of androgen receptor signaling pathway","2/473","24/11852",0.24832267751819,0.24832267751819,0.927453163534563,"NCOR1/HDAC6",2
GO:0090218,"GO:0090218","positive regulation of lipid kinase activity","2/473","24/11852",0.24832267751819,0.24832267751819,0.927453163534563,"VAV3/PTK2",2
GO:1903393,"GO:1903393","positive regulation of adherens junction organization","2/473","24/11852",0.24832267751819,0.24832267751819,0.927453163534563,"NRP1/ARF6",2
GO:2001258,"GO:2001258","negative regulation of cation channel activity","2/473","24/11852",0.24832267751819,0.24832267751819,0.927453163534563,"CALM2/CALM1",2
GO:0050707,"GO:0050707","regulation of cytokine secretion","6/473","106/11852",0.24859323553681,0.24859323553681,0.927453163534563,"FRMD8/F2R/MAVS/LGR4/TRIM6/CD58",6
GO:0051607,"GO:0051607","defense response to virus","9/473","172/11852",0.249282284079071,0.249282284079071,0.927453163534563,"EIF2AK4/TRIM5/MAVS/EIF2AK2/STAT2/SAMHD1/STAT1/TRIM6/ZMPSTE24",9
GO:0017148,"GO:0017148","negative regulation of translation","7/473","128/11852",0.250296105078748,0.250296105078748,0.927453163534563,"EIF2AK4/AGO4/PURA/EIF2AK2/PAIP2B/PAIP2/C8orf88",7
GO:0021543,"GO:0021543","pallium development","7/473","128/11852",0.250296105078748,0.250296105078748,0.927453163534563,"TACC1/ASPM/SLC38A2/NRP1/BBS2/DIXDC1/SEMA3A",7
GO:0032355,"GO:0032355","response to estradiol","5/473","85/11852",0.251590428773945,0.251590428773945,0.927453163534563,"CASP8/MBD2/STXBP1/NCOA3/CDKN1B",5
GO:0032482,"GO:0032482","Rab protein signal transduction","4/473","64/11852",0.251758704364654,0.251758704364654,0.927453163534563,"MADD/RAB6A/RAB6B/RAB10",4
GO:0035282,"GO:0035282","segmentation","4/473","64/11852",0.251758704364654,0.251758704364654,0.927453163534563,"SMAD4/NRP1/BMI1/SEMA3A",4
GO:1902117,"GO:1902117","positive regulation of organelle assembly","4/473","64/11852",0.251758704364654,0.251758704364654,0.927453163534563,"GPSM2/SPAG5/PDCD6IP/RALB",4
GO:1903051,"GO:1903051","negative regulation of proteolysis involved in cellular protein catabolic process","4/473","64/11852",0.251758704364654,0.251758704364654,0.927453163534563,"USP19/ERLEC1/GABARAPL2/PBK",4
GO:0019233,"GO:0019233","sensory perception of pain","3/473","44/11852",0.256102518798638,0.256102518798638,0.927453163534563,"F2R/FYN/RETREG1",3
GO:0021885,"GO:0021885","forebrain cell migration","3/473","44/11852",0.256102518798638,0.256102518798638,0.927453163534563,"NRP1/DIXDC1/SEMA3A",3
GO:0035306,"GO:0035306","positive regulation of dephosphorylation","3/473","44/11852",0.256102518798638,0.256102518798638,0.927453163534563,"PPP2R5A/CALM2/CALM1",3
GO:0035567,"GO:0035567","non-canonical Wnt signaling pathway","7/473","129/11852",0.25639758878527,0.25639758878527,0.927453163534563,"AGO4/IFT80/PRICKLE2/DAAM1/PSMD5/VANGL1/CALM1",7
GO:0032956,"GO:0032956","regulation of actin cytoskeleton organization","13/473","264/11852",0.256825843391269,0.256825843391269,0.927453163534563,"ILK/SMAD4/PHLDB2/CARMIL1/CIT/NRP1/RHOBTB1/GMFB/MTPN/RHOBTB3/DIXDC1/RHOU/ARF6",13
GO:0006637,"GO:0006637","acyl-CoA metabolic process","5/473","86/11852",0.25917841739714,0.25917841739714,0.927453163534563,"ACOT13/ACSS2/PDK4/PDP1/PPCS",5
GO:0006903,"GO:0006903","vesicle targeting","5/473","86/11852",0.25917841739714,0.25917841739714,0.927453163534563,"GOLGA2/WIPI1/TRAPPC6B/SNAP23/STARD3NL",5
GO:0035383,"GO:0035383","thioester metabolic process","5/473","86/11852",0.25917841739714,0.25917841739714,0.927453163534563,"ACOT13/ACSS2/PDK4/PDP1/PPCS",5
GO:0031334,"GO:0031334","positive regulation of protein complex assembly","11/473","219/11852",0.259263434495211,0.259263434495211,0.927453163534563,"HDAC6/BIK/TPPP/CUL4B/CARMIL1/RHOBTB1/GMFB/XPA/GTF2H5/ARF6/CDKN1B",11
GO:0098609,"GO:0098609","cell-cell adhesion","23/473","497/11852",0.259751296195393,0.259751296195393,0.927453163534563,"ILK/DPP4/FLRT3/STXBP6/SOCS6/PIK3CG/PDE5A/FYN/DSC2/STXBP1/DLG3/TGFBR2/PTK2/PRKAR1A/CYP1B1/MPZL2/RAB10/VMP1/KIFAP3/CLDN23/IL18/CD58/CD164",23
GO:0051648,"GO:0051648","vesicle localization","12/473","242/11852",0.260444407163585,0.260444407163585,0.927453163534563,"GOLGA2/WIPI1/PIK3CG/TRAPPC6B/STXBP1/STX2/RAP1B/SNAP23/BBS2/TMEM230/KIFAP3/STARD3NL",12
GO:0006112,"GO:0006112","energy reserve metabolic process","4/473","65/11852",0.260588769934006,0.260588769934006,0.927453163534563,"SORBS1/PGM2L1/EPM2AIP1/CALM1",4
GO:0046128,"GO:0046128","purine ribonucleoside metabolic process","4/473","65/11852",0.260588769934006,0.260588769934006,0.927453163534563,"TJP2/MOCS2/PRTFDC1/NME7",4
GO:0051303,"GO:0051303","establishment of chromosome localization","4/473","65/11852",0.260588769934006,0.260588769934006,0.927453163534563,"SPAG5/NUF2/NDC80/CHMP1B",4
GO:0030177,"GO:0030177","positive regulation of Wnt signaling pathway","8/473","152/11852",0.26159222263373,0.26159222263373,0.927453163534563,"ILK/ASPM/MBD2/LGR4/SOX4/DIXDC1/PSMD5/ARNTL",8
GO:0040008,"GO:0040008","regulation of growth","23/473","498/11852",0.262863941272222,0.262863941272222,0.927453163534563,"APBB2/ILK/SMAD4/CDKL5/SOCS6/CCNB2/TSG101/RUFY3/SMARCA2/MCTS1/MAP3K13/JARID2/NRP1/TGFBR2/PTK2/MTPN/BBS2/YEATS4/CDKN2C/CDKN1B/ZMPSTE24/CDKN2AIP/SEMA3A",23
GO:0003417,"GO:0003417","growth plate cartilage development","2/473","25/11852",0.263317993711798,0.263317993711798,0.927453163534563,"TGFBR2/ZMPSTE24",2
GO:0007140,"GO:0007140","male meiotic nuclear division","2/473","25/11852",0.263317993711798,0.263317993711798,0.927453163534563,"AGO4/MLH3",2
GO:0009584,"GO:0009584","detection of visible light","2/473","25/11852",0.263317993711798,0.263317993711798,0.927453163534563,"GNAQ/CALM1",2
GO:0032509,"GO:0032509","endosome transport via multivesicular body sorting pathway","2/473","25/11852",0.263317993711798,0.263317993711798,0.927453163534563,"TMEM50B/CHMP1B",2
GO:0033522,"GO:0033522","histone H2A ubiquitination","2/473","25/11852",0.263317993711798,0.263317993711798,0.927453163534563,"CUL4B/BMI1",2
GO:0043330,"GO:0043330","response to exogenous dsRNA","2/473","25/11852",0.263317993711798,0.263317993711798,0.927453163534563,"MAVS/RALB",2
GO:0046456,"GO:0046456","icosanoid biosynthetic process","2/473","25/11852",0.263317993711798,0.263317993711798,0.927453163534563,"CBR1/PNPLA8",2
GO:0051788,"GO:0051788","response to misfolded protein","2/473","25/11852",0.263317993711798,0.263317993711798,0.927453163534563,"HDAC6/ATXN3",2
GO:0072604,"GO:0072604","interleukin-6 secretion","2/473","25/11852",0.263317993711798,0.263317993711798,0.927453163534563,"F2R/MAVS",2
GO:1901797,"GO:1901797","negative regulation of signal transduction by p53 class mediator","2/473","25/11852",0.263317993711798,0.263317993711798,0.927453163534563,"RFFL/MDM2",2
GO:0002444,"GO:0002444","myeloid leukocyte mediated immunity","19/473","405/11852",0.265289690265082,0.265289690265082,0.927453163534563,"UBR4/SERPINB9/GM2A/IRAK4/PIK3CG/RAB6A/STXBP1/MAVS/RAP1B/PAFAH1B2/ACTR10/SNAP23/GGH/NDUFC2/VAPA/METTL7A/RAB10/CD58/C6orf120",19
GO:0006476,"GO:0006476","protein deacetylation","5/473","87/11852",0.266820012039389,0.266820012039389,0.927453163534563,"HDAC6/HDAC11/SDR16C5/MTA3/SAP30",5
GO:1905037,"GO:1905037","autophagosome organization","5/473","87/11852",0.266820012039389,0.266820012039389,0.927453163534563,"WIPI1/GABARAPL1/RALB/VMP1/GABARAPL2",5
GO:0048844,"GO:0048844","artery morphogenesis","3/473","45/11852",0.266988919741215,0.266988919741215,0.927453163534563,"NRP1/LDLR/SOX4",3
GO:1904427,"GO:1904427","positive regulation of calcium ion transmembrane transport","3/473","45/11852",0.266988919741215,0.266988919741215,0.927453163534563,"F2R/CALM2/CALM1",3
GO:0007281,"GO:0007281","germ cell development","8/473","153/11852",0.267285831303609,0.267285831303609,0.927453163534563,"CDC25B/ASPM/PDE5A/SMARCA2/ABHD2/ICA1L/BBS2/CEP57",8
GO:0043523,"GO:0043523","regulation of neuron apoptotic process","8/473","153/11852",0.267285831303609,0.267285831303609,0.927453163534563,"ILK/STAMBP/F2R/FYN/STXBP1/NRP1/RETREG1/TRIM2",8
GO:0042060,"GO:0042060","wound healing","17/473","359/11852",0.267490789083344,0.267490789083344,0.927453163534563,"ILK/CADM4/EVPL/PHLDB2/VAV3/F2R/PIK3CG/PLAT/FYN/GNAQ/STXBP1/CARMIL1/TGFBR2/MTPN/PRKAR1A/C1GALT1C1/CDKN1B",17
GO:0033209,"GO:0033209","tumor necrosis factor-mediated signaling pathway","7/473","131/11852",0.268728307648555,0.268728307648555,0.927453163534563,"MADD/ILK/CASP8/RFFL/EDAR/STAT1/PSMD5",7
GO:0048771,"GO:0048771","tissue remodeling","6/473","109/11852",0.268882994756082,0.268882994756082,0.927453163534563,"F2R/PDK4/MDM2/LGR4/SNX10/IL18",6
GO:0018108,"GO:0018108","peptidyl-tyrosine phosphorylation","12/473","244/11852",0.269416539601629,0.269416539601629,0.927453163534563,"CADM4/NEK1/TSG101/ARL2BP/FYN/DLG3/EIF2AK2/NRP1/PTK2/TTK/MELK/IL18",12
GO:0046785,"GO:0046785","microtubule polymerization","4/473","66/11852",0.26947775142182,0.26947775142182,0.927453163534563,"GOLGA2/TUBGCP5/TPPP/CDKN1B",4
GO:0050000,"GO:0050000","chromosome localization","4/473","66/11852",0.26947775142182,0.26947775142182,0.927453163534563,"SPAG5/NUF2/NDC80/CHMP1B",4
GO:0045927,"GO:0045927","positive regulation of growth","9/473","176/11852",0.270378454553863,0.270378454553863,0.927453163534563,"ILK/CDKL5/RUFY3/MAP3K13/NRP1/TGFBR2/MTPN/BBS2/CDKN2AIP",9
GO:0006486,"GO:0006486","protein glycosylation","10/473","199/11852",0.272322873227961,0.272322873227961,0.927453163534563,"GOLGA2/FUT8/B4GAT1/B3GALT4/TMEM59/DPY19L4/C1GALT1C1/ALG6/MAN1A1/DPY19L1",10
GO:0043413,"GO:0043413","macromolecule glycosylation","10/473","199/11852",0.272322873227961,0.272322873227961,0.927453163534563,"GOLGA2/FUT8/B4GAT1/B3GALT4/TMEM59/DPY19L4/C1GALT1C1/ALG6/MAN1A1/DPY19L1",10
GO:0046651,"GO:0046651","lymphocyte proliferation","8/473","154/11852",0.273015267240063,0.273015267240063,0.927453163534563,"VAV3/PIK3CG/PDE5A/FYN/PURA/TGFBR2/PRKAR1A/IL18",8
GO:0045787,"GO:0045787","positive regulation of cell cycle","15/473","314/11852",0.273044204852467,0.273044204852467,0.927453163534563,"PBX1/USP19/CDC25B/GPSM2/CDC25C/SPAG5/MTA3/CUL4B/CDC14B/CIT/MDM2/SOX4/NDC80/DYNLT3/CDKN1B",15
GO:0048589,"GO:0048589","developmental growth","22/473","478/11852",0.27410855475263,0.27410855475263,0.927453163534563,"HDAC6/ILK/SMAD4/CDKL5/FLRT3/EIF2AK4/KDM5B/ASPM/RUFY3/MAP3K13/JARID2/NRP1/TGFBR2/PTK2/XPA/TMEM38B/MTPN/PRKAR1A/BBS2/CDKN1B/ZMPSTE24/SEMA3A",22
GO:0048515,"GO:0048515","spermatid differentiation","5/473","88/11852",0.274511251868157,0.274511251868157,0.927453163534563,"SMARCA2/ABHD2/ICA1L/BBS2/CEP57",5
GO:0051402,"GO:0051402","neuron apoptotic process","9/473","177/11852",0.275735361717677,0.275735361717677,0.927453163534563,"ILK/STAMBP/F2R/FYN/STXBP1/CIT/NRP1/RETREG1/TRIM2",9
GO:0032273,"GO:0032273","positive regulation of protein polymerization","6/473","110/11852",0.27573705424714,0.27573705424714,0.927453163534563,"TPPP/CARMIL1/RHOBTB1/GMFB/ARF6/CDKN1B",6
GO:0035107,"GO:0035107","appendage morphogenesis","6/473","110/11852",0.27573705424714,0.27573705424714,0.927453163534563,"PBX1/C2CD3/SMAD4/FAM92A/LMBR1/SOX4",6
GO:0035108,"GO:0035108","limb morphogenesis","6/473","110/11852",0.27573705424714,0.27573705424714,0.927453163534563,"PBX1/C2CD3/SMAD4/FAM92A/LMBR1/SOX4",6
GO:0021675,"GO:0021675","nerve development","3/473","46/11852",0.277928155111777,0.277928155111777,0.927453163534563,"ILK/NRP1/SEMA3A",3
GO:0032637,"GO:0032637","interleukin-8 production","3/473","46/11852",0.277928155111777,0.277928155111777,0.927453163534563,"F2R/MAVS/CD58",3
GO:0061045,"GO:0061045","negative regulation of wound healing","3/473","46/11852",0.277928155111777,0.277928155111777,0.927453163534563,"PHLDB2/PLAT/CDKN1B",3
GO:0006760,"GO:0006760","folic acid-containing compound metabolic process","2/473","26/11852",0.278316056996955,0.278316056996955,0.927453163534563,"MTHFD2L/GGH",2
GO:0007020,"GO:0007020","microtubule nucleation","2/473","26/11852",0.278316056996955,0.278316056996955,0.927453163534563,"GOLGA2/TUBGCP5",2
GO:0035666,"GO:0035666","TRIF-dependent toll-like receptor signaling pathway","2/473","26/11852",0.278316056996955,0.278316056996955,0.927453163534563,"CASP8/UBE2D1",2
GO:0038083,"GO:0038083","peptidyl-tyrosine autophosphorylation","2/473","26/11852",0.278316056996955,0.278316056996955,0.927453163534563,"FYN/PTK2",2
GO:0038084,"GO:0038084","vascular endothelial growth factor signaling pathway","2/473","26/11852",0.278316056996955,0.278316056996955,0.927453163534563,"CADM4/NRP1",2
GO:0048841,"GO:0048841","regulation of axon extension involved in axon guidance","2/473","26/11852",0.278316056996955,0.278316056996955,0.927453163534563,"NRP1/SEMA3A",2
GO:1905476,"GO:1905476","negative regulation of protein localization to membrane","2/473","26/11852",0.278316056996955,0.278316056996955,0.927453163534563,"PPP2R5A/TMEM59",2
GO:2000758,"GO:2000758","positive regulation of peptidyl-lysine acetylation","2/473","26/11852",0.278316056996955,0.278316056996955,0.927453163534563,"SMAD4/SOX4",2
GO:0031110,"GO:0031110","regulation of microtubule polymerization or depolymerization","4/473","67/11852",0.278419454964145,0.278419454964145,0.927453163534563,"HDAC6/SKA2/SKA1/CDKN1B",4
GO:0031503,"GO:0031503","protein-containing complex localization","12/473","246/11852",0.278489829812898,0.278489829812898,0.927453163534563,"IFT43/STXBP6/IFT80/DYNC2LI1/PURA/KIF3C/TTC30A/DLG3/STX7/RALB/KIFAP3/TCTEX1D2",12
GO:1905475,"GO:1905475","regulation of protein localization to membrane","8/473","155/11852",0.278778941068036,0.278778941068036,0.927453163534563,"ZMYND8/SORBS1/FYN/CASP8/PPP2R5A/STX7/TMEM59/ARF6",8
GO:0051495,"GO:0051495","positive regulation of cytoskeleton organization","9/473","178/11852",0.281122872410272,0.281122872410272,0.927453163534563,"GPSM2/SPAG5/CARMIL1/NRP1/RHOBTB1/GMFB/ARF6/CDKN1B/KATNBL1",9
GO:0001952,"GO:0001952","regulation of cell-matrix adhesion","5/473","89/11852",0.28224819505369,0.28224819505369,0.927453163534563,"ILK/PHLDB2/NRP1/PTK2/PLEKHA2",5
GO:0003158,"GO:0003158","endothelium development","5/473","89/11852",0.28224819505369,0.28224819505369,0.927453163534563,"SMAD4/TJP2/VEZF1/NRP1/RAP1B",5
GO:0022612,"GO:0022612","gland morphogenesis","5/473","89/11852",0.28224819505369,0.28224819505369,0.927453163534563,"KDM5B/NRP1/EDAR/TGFBR2/SEMA3A",5
GO:0006941,"GO:0006941","striated muscle contraction","6/473","111/11852",0.282631918660426,0.282631918660426,0.927453163534563,"PIK3CG/PDE5A/DSC2/TMEM38B/CALM2/CALM1",6
GO:0042542,"GO:0042542","response to hydrogen peroxide","6/473","111/11852",0.282631918660426,0.282631918660426,0.927453163534563,"HDAC6/FYN/MDM2/STAT1/CYP1B1/GLRX2",6
GO:0071236,"GO:0071236","cellular response to antibiotic","6/473","111/11852",0.282631918660426,0.282631918660426,0.927453163534563,"HDAC6/ADCY7/MDM2/CYP1B1/GNAI1/CDKN1B",6
GO:0003012,"GO:0003012","muscle system process","13/473","270/11852",0.282691856755912,0.282691856755912,0.927453163534563,"SMAD4/F2R/PIK3CG/PDE5A/SORBS1/DSC2/JARID2/PTK2/TMEM38B/MTPN/BBS2/CALM2/CALM1",13
GO:0010631,"GO:0010631","epithelial cell migration","11/473","224/11852",0.283023440996174,0.283023440996174,0.927453163534563,"HDAC6/KANK2/DPP4/MAP3K3/NRP1/TGFBR2/PTK2/CYP1B1/CAPN7/ARF6/SEMA3A",11
GO:0018212,"GO:0018212","peptidyl-tyrosine modification","12/473","247/11852",0.283062528763014,0.283062528763014,0.927453163534563,"CADM4/NEK1/TSG101/ARL2BP/FYN/DLG3/EIF2AK2/NRP1/PTK2/TTK/MELK/IL18",12
GO:0032943,"GO:0032943","mononuclear cell proliferation","8/473","156/11852",0.284575256124303,0.284575256124303,0.927453163534563,"VAV3/PIK3CG/PDE5A/FYN/PURA/TGFBR2/PRKAR1A/IL18",8
GO:0006413,"GO:0006413","translational initiation","9/473","179/11852",0.286539701707045,0.286539701707045,0.927453163534563,"EIF2AK4/MTIF3/MCTS1/EIF2AK2/PAIP2B/PAIP2/PAIP1/RPS10/C8orf88",9
GO:0007045,"GO:0007045","cell-substrate adherens junction assembly","4/473","68/11852",0.287407773348336,0.287407773348336,0.927453163534563,"PHLDB2/SORBS1/NRP1/PTK2",4
GO:0042278,"GO:0042278","purine nucleoside metabolic process","4/473","68/11852",0.287407773348336,0.287407773348336,0.927453163534563,"TJP2/MOCS2/PRTFDC1/NME7",4
GO:0048041,"GO:0048041","focal adhesion assembly","4/473","68/11852",0.287407773348336,0.287407773348336,0.927453163534563,"PHLDB2/SORBS1/NRP1/PTK2",4
GO:0051289,"GO:0051289","protein homotetramerization","4/473","68/11852",0.287407773348336,0.287407773348336,0.927453163534563,"ACOT13/GOLGA2/SAMHD1/CRYZ",4
GO:0010332,"GO:0010332","response to gamma radiation","3/473","47/11852",0.288909339408267,0.288909339408267,0.927453163534563,"MDM2/GTF2H5/ZMPSTE24",3
GO:0042246,"GO:0042246","tissue regeneration","3/473","47/11852",0.288909339408267,0.288909339408267,0.927453163534563,"TGFBR2/MTPN/CDKN1B",3
GO:0042098,"GO:0042098","T cell proliferation","6/473","112/11852",0.289564832232836,0.289564832232836,0.927453163534563,"PIK3CG/PDE5A/FYN/TGFBR2/PRKAR1A/IL18",6
GO:1903034,"GO:1903034","regulation of response to wounding","6/473","112/11852",0.289564832232836,0.289564832232836,0.927453163534563,"CADM4/PHLDB2/F2R/PLAT/TGFBR2/CDKN1B",6
GO:0045834,"GO:0045834","positive regulation of lipid metabolic process","5/473","90/11852",0.290026923791331,0.290026923791331,0.927453163534563,"VAV3/SORBS1/LDLR/PTK2/CREBL2",5
GO:0007093,"GO:0007093","mitotic cell cycle checkpoint","8/473","157/11852",0.290402609849275,0.290402609849275,0.927453163534563,"CDC25C/ZFYVE19/MDM2/SOX4/TTK/BUB1/NDC80/CDKN1B",8
GO:0006163,"GO:0006163","purine nucleotide metabolic process","20/473","436/11852",0.291485249612284,0.291485249612284,0.927453163534563,"ACOT13/NCOR1/ACSS2/ADCY7/TJP2/PDK4/PDE5A/PGM2L1/MOCS2/SAMHD1/DCAKD/COX7C/COA6/NDUFB6/PDP1/ATP6V1A/MTHFD2L/NDUFC2/NME7/PPCS",20
GO:0033673,"GO:0033673","negative regulation of kinase activity","10/473","203/11852",0.292666485387003,0.292666485387003,0.927453163534563,"ILK/TSG101/STK38/GNAQ/SORL1/GMFB/PPP2R5A/PRKAR1A/CDKN2C/CDKN1B",10
GO:0090132,"GO:0090132","epithelium migration","11/473","226/11852",0.292706549077194,0.292706549077194,0.927453163534563,"HDAC6/KANK2/DPP4/MAP3K3/NRP1/TGFBR2/PTK2/CYP1B1/CAPN7/ARF6/SEMA3A",11
GO:0000266,"GO:0000266","mitochondrial fission","2/473","27/11852",0.293292814053194,0.293292814053194,0.927453163534563,"MTFR1L/STAT2",2
GO:0006739,"GO:0006739","NADP metabolic process","2/473","27/11852",0.293292814053194,0.293292814053194,0.927453163534563,"ME1/NUDT12",2
GO:0010862,"GO:0010862","positive regulation of pathway-restricted SMAD protein phosphorylation","2/473","27/11852",0.293292814053194,0.293292814053194,0.927453163534563,"SMAD4/TTK",2
GO:0043030,"GO:0043030","regulation of macrophage activation","2/473","27/11852",0.293292814053194,0.293292814053194,0.927453163534563,"MYO18A/LDLR",2
GO:0043516,"GO:0043516","regulation of DNA damage response, signal transduction by p53 class mediator","2/473","27/11852",0.293292814053194,0.293292814053194,0.927453163534563,"MDM2/ZMPSTE24",2
GO:0045736,"GO:0045736","negative regulation of cyclin-dependent protein serine/threonine kinase activity","2/473","27/11852",0.293292814053194,0.293292814053194,0.927453163534563,"CDKN2C/CDKN1B",2
GO:0046326,"GO:0046326","positive regulation of glucose import","2/473","27/11852",0.293292814053194,0.293292814053194,0.927453163534563,"SORBS1/CREBL2",2
GO:0048536,"GO:0048536","spleen development","2/473","27/11852",0.293292814053194,0.293292814053194,0.927453163534563,"PBX1/JARID2",2
GO:0070076,"GO:0070076","histone lysine demethylation","2/473","27/11852",0.293292814053194,0.293292814053194,0.927453163534563,"KDM5B/JARID2",2
GO:2000826,"GO:2000826","regulation of heart morphogenesis","2/473","27/11852",0.293292814053194,0.293292814053194,0.927453163534563,"SMAD4/TGFBR2",2
GO:0001959,"GO:0001959","regulation of cytokine-mediated signaling pathway","7/473","135/11852",0.293843481974592,0.293843481974592,0.927453163534563,"MADD/CASP8/RFFL/MAVS/SAMHD1/STAT1/TRIM6",7
GO:0032101,"GO:0032101","regulation of response to external stimulus","22/473","484/11852",0.293844932174348,0.293844932174348,0.927453163534563,"KANK2/ADCY7/PHLDB2/EIF2AK4/TRIM5/F2R/PIK3CG/PLAT/CDK19/MAVS/NRP1/LDLR/TGFBR2/STAT1/BBS2/TRIM6/CALM1/IL18/CDKN1B/ZMPSTE24/SEMA3A/PBK",22
GO:0000422,"GO:0000422","autophagy of mitochondrion","4/473","69/11852",0.296436693828732,0.296436693828732,0.927453163534563,"HDAC6/WIPI1/GABARAPL1/GABARAPL2",4
GO:0001657,"GO:0001657","ureteric bud development","4/473","69/11852",0.296436693828732,0.296436693828732,0.927453163534563,"ILK/PBX1/SMAD4/LGR4",4
GO:0061726,"GO:0061726","mitochondrion disassembly","4/473","69/11852",0.296436693828732,0.296436693828732,0.927453163534563,"HDAC6/WIPI1/GABARAPL1/GABARAPL2",4
GO:0110020,"GO:0110020","regulation of actomyosin structure organization","4/473","69/11852",0.296436693828732,0.296436693828732,0.927453163534563,"SMAD4/PHLDB2/CARMIL1/NRP1",4
GO:0033865,"GO:0033865","nucleoside bisphosphate metabolic process","6/473","113/11852",0.296533045615153,0.296533045615153,0.927453163534563,"ACOT13/ACSS2/PDK4/DCAKD/PDP1/PPCS",6
GO:0033875,"GO:0033875","ribonucleoside bisphosphate metabolic process","6/473","113/11852",0.296533045615153,0.296533045615153,0.927453163534563,"ACOT13/ACSS2/PDK4/DCAKD/PDP1/PPCS",6
GO:0034032,"GO:0034032","purine nucleoside bisphosphate metabolic process","6/473","113/11852",0.296533045615153,0.296533045615153,0.927453163534563,"ACOT13/ACSS2/PDK4/DCAKD/PDP1/PPCS",6
GO:0046467,"GO:0046467","membrane lipid biosynthetic process","6/473","113/11852",0.296533045615153,0.296533045615153,0.927453163534563,"SGPP2/PIGB/PIGM/SCCPDH/B3GALT4/VAPA",6
GO:0072522,"GO:0072522","purine-containing compound biosynthetic process","11/473","227/11852",0.29758290307265,0.29758290307265,0.927453163534563,"NCOR1/ACSS2/ADCY7/PDK4/PGM2L1/DCAKD/PRTFDC1/PDP1/MTHFD2L/NME7/PPCS",11
GO:0022604,"GO:0022604","regulation of cell morphogenesis","17/473","367/11852",0.297668397423472,0.297668397423472,0.927453163534563,"ILK/CDKL5/KIF13B/EPB41/AGO4/RUFY3/FYN/MAP3K13/TNIK/CARMIL1/NRP1/PTK2/ZMYM1/RHOBTB3/RHOU/ZMPSTE24/SEMA3A",17
GO:0006664,"GO:0006664","glycolipid metabolic process","5/473","91/11852",0.29784354908115,0.29784354908115,0.927453163534563,"GM2A/PIGB/PIGM/SCCPDH/B3GALT4",5
GO:1903509,"GO:1903509","liposaccharide metabolic process","5/473","91/11852",0.29784354908115,0.29784354908115,0.927453163534563,"GM2A/PIGB/PIGM/SCCPDH/B3GALT4",5
GO:0001885,"GO:0001885","endothelial cell development","3/473","48/11852",0.299921944289501,0.299921944289501,0.927453163534563,"TJP2/VEZF1/RAP1B",3
GO:0010803,"GO:0010803","regulation of tumor necrosis factor-mediated signaling pathway","3/473","48/11852",0.299921944289501,0.299921944289501,0.927453163534563,"MADD/CASP8/RFFL",3
GO:0032387,"GO:0032387","negative regulation of intracellular transport","3/473","48/11852",0.299921944289501,0.299921944289501,0.927453163534563,"ERLEC1/RAP1B/MDFIC",3
GO:0042509,"GO:0042509","regulation of tyrosine phosphorylation of STAT protein","3/473","48/11852",0.299921944289501,0.299921944289501,0.927453163534563,"ARL2BP/FYN/IL18",3
GO:0046323,"GO:0046323","glucose import","3/473","48/11852",0.299921944289501,0.299921944289501,0.927453163534563,"SORBS1/RTN2/CREBL2",3
GO:0046847,"GO:0046847","filopodium assembly","3/473","48/11852",0.299921944289501,0.299921944289501,0.927453163534563,"ZMYND8/NRP1/ARF6",3
GO:0051438,"GO:0051438","regulation of ubiquitin-protein transferase activity","3/473","48/11852",0.299921944289501,0.299921944289501,0.927453163534563,"GOLGA2/CDC14B/BMI1",3
GO:0016573,"GO:0016573","histone acetylation","7/473","136/11852",0.300204817279048,0.300204817279048,0.927453163534563,"SMAD4/SDR16C5/NCOA3/KAT6B/YEATS4/EID1/ZMPSTE24",7
GO:0045732,"GO:0045732","positive regulation of protein catabolic process","9/473","182/11852",0.302953163620468,0.302953163620468,0.927453163534563,"FBXL5/CUL4B/SORL1/LDLR/PTK2/MDM2/RNFT1/ATXN3/CDKN1B",9
GO:0010717,"GO:0010717","regulation of epithelial to mesenchymal transition","4/473","70/11852",0.30550030529228,0.30550030529228,0.927453163534563,"USF3/SMAD4/PHLDB2/TGFBR2",4
GO:0045471,"GO:0045471","response to ethanol","4/473","70/11852",0.30550030529228,0.30550030529228,0.927453163534563,"ADCY7/FYN/CASP8/GGH",4
GO:0051341,"GO:0051341","regulation of oxidoreductase activity","4/473","70/11852",0.30550030529228,0.30550030529228,0.927453163534563,"HDAC6/ZDHHC21/PDP1/CALM1",4
GO:0072163,"GO:0072163","mesonephric epithelium development","4/473","70/11852",0.30550030529228,0.30550030529228,0.927453163534563,"ILK/PBX1/SMAD4/LGR4",4
GO:0072164,"GO:0072164","mesonephric tubule development","4/473","70/11852",0.30550030529228,0.30550030529228,0.927453163534563,"ILK/PBX1/SMAD4/LGR4",4
GO:0009611,"GO:0009611","response to wounding","20/473","440/11852",0.305568530873442,0.305568530873442,0.927453163534563,"ILK/CADM4/FLRT3/EVPL/PHLDB2/VAV3/F2R/PIK3CG/PLAT/FYN/GNAQ/STXBP1/CARMIL1/NRP1/TGFBR2/ABHD2/MTPN/PRKAR1A/C1GALT1C1/CDKN1B",20
GO:0009062,"GO:0009062","fatty acid catabolic process","5/473","92/11852",0.305694215266205,0.305694215266205,0.927453163534563,"ACOX1/AUH/EHHADH/ABHD2/ABHD3",5
GO:0030509,"GO:0030509","BMP signaling pathway","5/473","92/11852",0.305694215266205,0.305694215266205,0.927453163534563,"ILK/SMAD4/ZNF8/SORL1/UBE2D1",5
GO:0051223,"GO:0051223","regulation of protein transport","22/473","488/11852",0.307264229890336,0.307264229890336,0.927453163534563,"MYO18A/DPP4/FRMD8/TSG101/F2R/ARL2BP/RUFY3/FYN/GOLPH3L/MAVS/SORL1/MDM2/ERLEC1/LGR4/SOX4/NDFIP1/TRIM6/MDFIC/ARNTL/RHOU/ARF6/CD58",22
GO:0090130,"GO:0090130","tissue migration","11/473","229/11852",0.307400669452976,0.307400669452976,0.927453163534563,"HDAC6/KANK2/DPP4/MAP3K3/NRP1/TGFBR2/PTK2/CYP1B1/CAPN7/ARF6/SEMA3A",11
GO:0007204,"GO:0007204","positive regulation of cytosolic calcium ion concentration","8/473","160/11852",0.308054817602113,0.308054817602113,0.927453163534563,"FKBP1A/PLCH1/F2R/PIK3CG/FYN/TMEM38B/CALM2/CALM1",8
GO:0032102,"GO:0032102","negative regulation of response to external stimulus","10/473","206/11852",0.308186333450381,0.308186333450381,0.927453163534563,"KANK2/ADCY7/PHLDB2/PLAT/NRP1/LDLR/BBS2/CDKN1B/SEMA3A/PBK",10
GO:0000132,"GO:0000132","establishment of mitotic spindle orientation","2/473","28/11852",0.308226119272405,0.308226119272405,0.927453163534563,"GPSM2/NDC80",2
GO:0009395,"GO:0009395","phospholipid catabolic process","2/473","28/11852",0.308226119272405,0.308226119272405,0.927453163534563,"LDLR/PNPLA8",2
GO:0010458,"GO:0010458","exit from mitosis","2/473","28/11852",0.308226119272405,0.308226119272405,0.927453163534563,"CDC14B/CDKN1B",2
GO:0014911,"GO:0014911","positive regulation of smooth muscle cell migration","2/473","28/11852",0.308226119272405,0.308226119272405,0.927453163534563,"NRP1/MDM2",2
GO:0016577,"GO:0016577","histone demethylation","2/473","28/11852",0.308226119272405,0.308226119272405,0.927453163534563,"KDM5B/JARID2",2
GO:0018345,"GO:0018345","protein palmitoylation","2/473","28/11852",0.308226119272405,0.308226119272405,0.927453163534563,"ABHD17C/ZDHHC21",2
GO:0019229,"GO:0019229","regulation of vasoconstriction","2/473","28/11852",0.308226119272405,0.308226119272405,0.927453163534563,"KCNMB4/F2R",2
GO:0030261,"GO:0030261","chromosome condensation","2/473","28/11852",0.308226119272405,0.308226119272405,0.927453163534563,"SMC4/NCAPG",2
GO:0033344,"GO:0033344","cholesterol efflux","2/473","28/11852",0.308226119272405,0.308226119272405,0.927453163534563,"TTC39B/ABCA5",2
GO:0034205,"GO:0034205","amyloid-beta formation","2/473","28/11852",0.308226119272405,0.308226119272405,0.927453163534563,"SORL1/PSENEN",2
GO:0042181,"GO:0042181","ketone biosynthetic process","2/473","28/11852",0.308226119272405,0.308226119272405,0.927453163534563,"COQ5/COQ10B",2
GO:0043094,"GO:0043094","cellular metabolic compound salvage","2/473","28/11852",0.308226119272405,0.308226119272405,0.927453163534563,"PRTFDC1/ADI1",2
GO:0046039,"GO:0046039","GTP metabolic process","2/473","28/11852",0.308226119272405,0.308226119272405,0.927453163534563,"MOCS2/NME7",2
GO:0046466,"GO:0046466","membrane lipid catabolic process","2/473","28/11852",0.308226119272405,0.308226119272405,0.927453163534563,"GM2A/CYP1B1",2
GO:0070873,"GO:0070873","regulation of glycogen metabolic process","2/473","28/11852",0.308226119272405,0.308226119272405,0.927453163534563,"SORBS1/EPM2AIP1",2
GO:0071354,"GO:0071354","cellular response to interleukin-6","2/473","28/11852",0.308226119272405,0.308226119272405,0.927453163534563,"SMAD4/STAT1",2
GO:0090200,"GO:0090200","positive regulation of release of cytochrome c from mitochondria","2/473","28/11852",0.308226119272405,0.308226119272405,0.927453163534563,"BIK/MLLT11",2
GO:1902042,"GO:1902042","negative regulation of extrinsic apoptotic signaling pathway via death domain receptors","2/473","28/11852",0.308226119272405,0.308226119272405,0.927453163534563,"CASP8/RFFL",2
GO:1902991,"GO:1902991","regulation of amyloid precursor protein catabolic process","2/473","28/11852",0.308226119272405,0.308226119272405,0.927453163534563,"FKBP1A/SORL1",2
GO:1904030,"GO:1904030","negative regulation of cyclin-dependent protein kinase activity","2/473","28/11852",0.308226119272405,0.308226119272405,0.927453163534563,"CDKN2C/CDKN1B",2
GO:2000648,"GO:2000648","positive regulation of stem cell proliferation","2/473","28/11852",0.308226119272405,0.308226119272405,0.927453163534563,"ASPM/N4BP2L2",2
GO:0043414,"GO:0043414","macromolecule methylation","12/473","253/11852",0.310955088411406,0.310955088411406,0.927453163534563,"SMAD4/THADA/EEF1AKMT2/RAB6A/MBD2/JARID2/ATF7IP/EEF1AKMT1/HENMT1/PCMT1/PCMTD1/ZMPSTE24",12
GO:0002088,"GO:0002088","lens development in camera-type eye","3/473","49/11852",0.310955804327269,0.310955804327269,0.927453163534563,"KDM5B/TGFBR2/CDKN1B",3
GO:0007215,"GO:0007215","glutamate receptor signaling pathway","3/473","49/11852",0.310955804327269,0.310955804327269,0.927453163534563,"FYN/GNAQ/DLG3",3
GO:0014855,"GO:0014855","striated muscle cell proliferation","3/473","49/11852",0.310955804327269,0.310955804327269,0.927453163534563,"JARID2/TGFBR2/PRKAR1A",3
GO:0031122,"GO:0031122","cytoplasmic microtubule organization","3/473","49/11852",0.310955804327269,0.310955804327269,0.927453163534563,"TUBGCP5/KATNAL1/HOOK3",3
GO:0034308,"GO:0034308","primary alcohol metabolic process","3/473","49/11852",0.310955804327269,0.310955804327269,0.927453163534563,"ACSS2/SDR16C5/CYP1B1",3
GO:0035019,"GO:0035019","somatic stem cell population maintenance","3/473","49/11852",0.310955804327269,0.310955804327269,0.927453163534563,"PBX1/SMAD4/SOX4",3
GO:0042733,"GO:0042733","embryonic digit morphogenesis","3/473","49/11852",0.310955804327269,0.310955804327269,0.927453163534563,"C2CD3/SMAD4/LMBR1",3
GO:0042982,"GO:0042982","amyloid precursor protein metabolic process","3/473","49/11852",0.310955804327269,0.310955804327269,0.927453163534563,"FKBP1A/SORL1/PSENEN",3
GO:0045839,"GO:0045839","negative regulation of mitotic nuclear division","3/473","49/11852",0.310955804327269,0.310955804327269,0.927453163534563,"TTK/BUB1/NDC80",3
GO:0051893,"GO:0051893","regulation of focal adhesion assembly","3/473","49/11852",0.310955804327269,0.310955804327269,0.927453163534563,"PHLDB2/NRP1/PTK2",3
GO:0072091,"GO:0072091","regulation of stem cell proliferation","3/473","49/11852",0.310955804327269,0.310955804327269,0.927453163534563,"ASPM/EIF2AK2/N4BP2L2",3
GO:0072528,"GO:0072528","pyrimidine-containing compound biosynthetic process","3/473","49/11852",0.310955804327269,0.310955804327269,0.927453163534563,"TPK1/AGPAT4/NME7",3
GO:0090109,"GO:0090109","regulation of cell-substrate junction assembly","3/473","49/11852",0.310955804327269,0.310955804327269,0.927453163534563,"PHLDB2/NRP1/PTK2",3
GO:0000077,"GO:0000077","DNA damage checkpoint","7/473","138/11852",0.313012141410081,0.313012141410081,0.927453163534563,"EIF2AK4/CDC25C/ABRAXAS1/CDC14B/MDM2/SOX4/CDKN1B",7
GO:0010469,"GO:0010469","regulation of signaling receptor activity","5/473","93/11852",0.313575104331287,0.313575104331287,0.927453163534563,"HDAC6/TSG101/DLG3/NCOA3/NRP1",5
GO:0043393,"GO:0043393","regulation of protein binding","9/473","184/11852",0.314018269707655,0.314018269707655,0.927453163534563,"FKBP1A/GOLGA2/EPB41/AKTIP/GAS8/SORL1/NRP1/RALB/ARF6",9
GO:0001823,"GO:0001823","mesonephros development","4/473","71/11852",0.314592804797087,0.314592804797087,0.927453163534563,"ILK/PBX1/SMAD4/LGR4",4
GO:0006805,"GO:0006805","xenobiotic metabolic process","4/473","71/11852",0.314592804797087,0.314592804797087,0.927453163534563,"CBR3/MARC2/CYP1B1/CRYZ",4
GO:0010927,"GO:0010927","cellular component assembly involved in morphogenesis","4/473","71/11852",0.314592804797087,0.314592804797087,0.927453163534563,"ILK/SMAD4/PHLDB2/PRKAR1A",4
GO:0050729,"GO:0050729","positive regulation of inflammatory response","4/473","71/11852",0.314592804797087,0.314592804797087,0.927453163534563,"PIK3CG/CDK19/LDLR/IL18",4
GO:0099175,"GO:0099175","regulation of postsynapse organization","4/473","71/11852",0.314592804797087,0.314592804797087,0.927453163534563,"CDKL5/ZMYND8/ABHD17C/FYN",4
GO:1901888,"GO:1901888","regulation of cell junction assembly","4/473","71/11852",0.314592804797087,0.314592804797087,0.927453163534563,"PHLDB2/NRP1/PTK2/RAP1B",4
GO:0002009,"GO:0002009","morphogenesis of an epithelium","19/473","419/11852",0.31543294163907,0.31543294163907,0.927453163534563,"ILK/PBX1/C2CD3/SMAD4/FLRT3/PHLDB2/KDM5B/DLG3/PRICKLE2/NRP1/TGFBR2/STAT1/LGR4/SOX4/DAAM1/PSMD5/RAB10/VANGL1/SEMA3A",19
GO:0051650,"GO:0051650","establishment of vesicle localization","11/473","231/11852",0.317299078015808,0.317299078015808,0.927453163534563,"GOLGA2/WIPI1/TRAPPC6B/STXBP1/STX2/RAP1B/SNAP23/BBS2/TMEM230/KIFAP3/STARD3NL",11
GO:0010634,"GO:0010634","positive regulation of epithelial cell migration","6/473","116/11852",0.317622147898556,0.317622147898556,0.927453163534563,"HDAC6/MAP3K3/NRP1/TGFBR2/CAPN7/ARF6",6
GO:0010977,"GO:0010977","negative regulation of neuron projection development","6/473","116/11852",0.317622147898556,0.317622147898556,0.927453163534563,"RUFY3/NRP1/PTK2/MDM2/ARF6/SEMA3A",6
GO:0018393,"GO:0018393","internal peptidyl-lysine acetylation","7/473","139/11852",0.319454028993985,0.319454028993985,0.927453163534563,"SMAD4/SDR16C5/NCOA3/KAT6B/YEATS4/EID1/ZMPSTE24",7
GO:0099003,"GO:0099003","vesicle-mediated transport in synapse","7/473","139/11852",0.319454028993985,0.319454028993985,0.927453163534563,"STXBP1/STX2/RAP1B/SNAP23/TMEM230/VAMP4/ARF6",7
GO:0007548,"GO:0007548","sex differentiation","9/473","185/11852",0.319583743331408,0.319583743331408,0.927453163534563,"PBX1/SMAD4/BIK/AGO4/ASPM/LGR4/RHOBTB3/CENPI/SEMA3A",9
GO:0051983,"GO:0051983","regulation of chromosome segregation","5/473","94/11852",0.321482439964569,0.321482439964569,0.927453163534563,"SPAG5/NEK2/TTK/BUB1/NDC80",5
GO:0006305,"GO:0006305","DNA alkylation","3/473","50/11852",0.322001121068944,0.322001121068944,0.927453163534563,"MBD2/ATF7IP/ZMPSTE24",3
GO:0006306,"GO:0006306","DNA methylation","3/473","50/11852",0.322001121068944,0.322001121068944,0.927453163534563,"MBD2/ATF7IP/ZMPSTE24",3
GO:0007260,"GO:0007260","tyrosine phosphorylation of STAT protein","3/473","50/11852",0.322001121068944,0.322001121068944,0.927453163534563,"ARL2BP/FYN/IL18",3
GO:0010827,"GO:0010827","regulation of glucose transmembrane transport","3/473","50/11852",0.322001121068944,0.322001121068944,0.927453163534563,"SORBS1/RTN2/CREBL2",3
GO:0032602,"GO:0032602","chemokine production","3/473","50/11852",0.322001121068944,0.322001121068944,0.927453163534563,"MAVS/EIF2AK2/IL18",3
GO:0046889,"GO:0046889","positive regulation of lipid biosynthetic process","3/473","50/11852",0.322001121068944,0.322001121068944,0.927453163534563,"SORBS1/LDLR/CREBL2",3
GO:0055013,"GO:0055013","cardiac muscle cell development","3/473","50/11852",0.322001121068944,0.322001121068944,0.927453163534563,"SMAD4/SGCB/ZMPSTE24",3
GO:0002756,"GO:0002756","MyD88-independent toll-like receptor signaling pathway","2/473","29/11852",0.323095621340714,0.323095621340714,0.927453163534563,"CASP8/UBE2D1",2
GO:0006363,"GO:0006363","termination of RNA polymerase I transcription","2/473","29/11852",0.323095621340714,0.323095621340714,0.927453163534563,"GTF2H5/ZMPSTE24",2
GO:0006506,"GO:0006506","GPI anchor biosynthetic process","2/473","29/11852",0.323095621340714,0.323095621340714,0.927453163534563,"PIGB/PIGM",2
GO:0010390,"GO:0010390","histone monoubiquitination","2/473","29/11852",0.323095621340714,0.323095621340714,0.927453163534563,"CUL4B/BMI1",2
GO:0010464,"GO:0010464","regulation of mesenchymal cell proliferation","2/473","29/11852",0.323095621340714,0.323095621340714,0.927453163534563,"TGFBR2/STAT1",2
GO:0010828,"GO:0010828","positive regulation of glucose transmembrane transport","2/473","29/11852",0.323095621340714,0.323095621340714,0.927453163534563,"SORBS1/CREBL2",2
GO:0010907,"GO:0010907","positive regulation of glucose metabolic process","2/473","29/11852",0.323095621340714,0.323095621340714,0.927453163534563,"SORBS1/EPM2AIP1",2
GO:0010955,"GO:0010955","negative regulation of protein processing","2/473","29/11852",0.323095621340714,0.323095621340714,0.927453163534563,"MDM2/TMEM59",2
GO:0014003,"GO:0014003","oligodendrocyte development","2/473","29/11852",0.323095621340714,0.323095621340714,0.927453163534563,"HDAC11/PRDM8",2
GO:0043276,"GO:0043276","anoikis","2/473","29/11852",0.323095621340714,0.323095621340714,0.927453163534563,"PDK4/PTK2",2
GO:0045143,"GO:0045143","homologous chromosome segregation","2/473","29/11852",0.323095621340714,0.323095621340714,0.927453163534563,"AGO4/MLH3",2
GO:0045616,"GO:0045616","regulation of keratinocyte differentiation","2/473","29/11852",0.323095621340714,0.323095621340714,0.927453163534563,"NCOA3/AQP3",2
GO:0048662,"GO:0048662","negative regulation of smooth muscle cell proliferation","2/473","29/11852",0.323095621340714,0.323095621340714,0.927453163534563,"ILK/CDKN1B",2
GO:0048846,"GO:0048846","axon extension involved in axon guidance","2/473","29/11852",0.323095621340714,0.323095621340714,0.927453163534563,"NRP1/SEMA3A",2
GO:0051642,"GO:0051642","centrosome localization","2/473","29/11852",0.323095621340714,0.323095621340714,0.927453163534563,"GPSM2/ASPM",2
GO:0150076,"GO:0150076","neuroinflammatory response","2/473","29/11852",0.323095621340714,0.323095621340714,0.927453163534563,"LDLR/IL18",2
GO:1901021,"GO:1901021","positive regulation of calcium ion transmembrane transporter activity","2/473","29/11852",0.323095621340714,0.323095621340714,0.927453163534563,"CALM2/CALM1",2
GO:1902284,"GO:1902284","neuron projection extension involved in neuron projection guidance","2/473","29/11852",0.323095621340714,0.323095621340714,0.927453163534563,"NRP1/SEMA3A",2
GO:1903318,"GO:1903318","negative regulation of protein maturation","2/473","29/11852",0.323095621340714,0.323095621340714,0.927453163534563,"MDM2/TMEM59",2
GO:0003014,"GO:0003014","renal system process","4/473","72/11852",0.32370850350723,0.32370850350723,0.927453163534563,"ADCY7/F2R/AQP3/PRKAR1A",4
GO:0071158,"GO:0071158","positive regulation of cell cycle arrest","4/473","72/11852",0.32370850350723,0.32370850350723,0.927453163534563,"CDC25C/MDM2/SOX4/CDKN1B",4
GO:0031330,"GO:0031330","negative regulation of cellular catabolic process","10/473","209/11852",0.323898503613322,0.323898503613322,0.927453163534563,"GOLGA2/USP19/PIK3CG/SORL1/PTK2/RRAGA/ERLEC1/PAIP1/GABARAPL2/PBK",10
GO:0008360,"GO:0008360","regulation of cell shape","6/473","117/11852",0.324704295273512,0.324704295273512,0.927453163534563,"EPB41/FYN/PTK2/RHOBTB3/RHOU/ZMPSTE24",6
GO:0006900,"GO:0006900","vesicle budding from membrane","5/473","95/11852",0.329412491385044,0.329412491385044,0.927453163534563,"MYO18A/GOLGA2/TRAPPC6B/GOLPH3L/VAPA",5
GO:0007041,"GO:0007041","lysosomal transport","5/473","95/11852",0.329412491385044,0.329412491385044,0.927453163534563,"TSG101/AKTIP/VPS39/HOOK3/SORL1",5
GO:0016358,"GO:0016358","dendrite development","9/473","187/11852",0.33077398878657,0.33077398878657,0.927453163534563,"HDAC6/ILK/CDKL5/ZMYND8/FYN/TNIK/NRP1/ARF6/SEMA3A",9
GO:1903322,"GO:1903322","positive regulation of protein modification by small protein conjugation or removal","6/473","118/11852",0.331808190431965,0.331808190431965,0.927453163534563,"FKBP1A/GOLGA2/CDC14B/UBE2D1/NDFIP1/BMI1",6
GO:2001251,"GO:2001251","negative regulation of chromosome organization","6/473","118/11852",0.331808190431965,0.331808190431965,0.927453163534563,"SDR16C5/JARID2/ASF1A/TTK/BUB1/NDC80",6
GO:0007219,"GO:0007219","Notch signaling pathway","7/473","141/11852",0.332404051740845,0.332404051740845,0.927453163534563,"PBX1/MIB2/AAK1/TGFBR2/PSENEN/STAT1/CDKN1B",7
GO:2000045,"GO:2000045","regulation of G1/S transition of mitotic cell cycle","7/473","141/11852",0.332404051740845,0.332404051740845,0.927453163534563,"KANK2/CDC25C/CUL4B/MDM2/SOX4/CDKN2C/CDKN1B",7
GO:0006767,"GO:0006767","water-soluble vitamin metabolic process","4/473","73/11852",0.332841832047314,0.332841832047314,0.927453163534563,"ABCD4/TPK1/MMADHC/MTHFD2L",4
GO:0010771,"GO:0010771","negative regulation of cell morphogenesis involved in differentiation","4/473","73/11852",0.332841832047314,0.332841832047314,0.927453163534563,"RUFY3/NRP1/PTK2/SEMA3A",4
GO:0034219,"GO:0034219","carbohydrate transmembrane transport","4/473","73/11852",0.332841832047314,0.332841832047314,0.927453163534563,"SLC17A5/SORBS1/RTN2/CREBL2",4
GO:0030071,"GO:0030071","regulation of mitotic metaphase/anaphase transition","3/473","51/11852",0.333048465561814,0.333048465561814,0.927453163534563,"TTK/BUB1/NDC80",3
GO:1904063,"GO:1904063","negative regulation of cation transmembrane transport","3/473","51/11852",0.333048465561814,0.333048465561814,0.927453163534563,"THADA/CALM2/CALM1",3
GO:0008015,"GO:0008015","blood circulation","14/473","305/11852",0.333685556414484,0.333685556414484,0.927453163534563,"KCNMB4/F2R/PIK3CG/PDE5A/TBC1D8/DSC2/MDM2/TMEM38B/STAT1/BBS2/CALM2/CALM1/ZMPSTE24/SEMA3A",14
GO:0001731,"GO:0001731","formation of translation preinitiation complex","1/473","10/11852",0.334641107061315,0.334641107061315,0.927453163534563,"MCTS1",1
GO:0001911,"GO:0001911","negative regulation of leukocyte mediated cytotoxicity","1/473","10/11852",0.334641107061315,0.334641107061315,0.927453163534563,"SERPINB9",1
GO:0001977,"GO:0001977","renal system process involved in regulation of blood volume","1/473","10/11852",0.334641107061315,0.334641107061315,0.927453163534563,"F2R",1
GO:0002328,"GO:0002328","pro-B cell differentiation","1/473","10/11852",0.334641107061315,0.334641107061315,0.927453163534563,"SOX4",1
GO:0002739,"GO:0002739","regulation of cytokine secretion involved in immune response","1/473","10/11852",0.334641107061315,0.334641107061315,0.927453163534563,"TRIM6",1
GO:0003157,"GO:0003157","endocardium development","1/473","10/11852",0.334641107061315,0.334641107061315,0.927453163534563,"SMAD4",1
GO:0006054,"GO:0006054","N-acetylneuraminate metabolic process","1/473","10/11852",0.334641107061315,0.334641107061315,0.927453163534563,"GNE",1
GO:0007202,"GO:0007202","activation of phospholipase C activity","1/473","10/11852",0.334641107061315,0.334641107061315,0.927453163534563,"GNAQ",1
GO:0007567,"GO:0007567","parturition","1/473","10/11852",0.334641107061315,0.334641107061315,0.927453163534563,"ARNTL",1
GO:0010421,"GO:0010421","hydrogen peroxide-mediated programmed cell death","1/473","10/11852",0.334641107061315,0.334641107061315,0.927453163534563,"HDAC6",1
GO:0010745,"GO:0010745","negative regulation of macrophage derived foam cell differentiation","1/473","10/11852",0.334641107061315,0.334641107061315,0.927453163534563,"ABCA5",1
GO:0014067,"GO:0014067","negative regulation of phosphatidylinositol 3-kinase signaling","1/473","10/11852",0.334641107061315,0.334641107061315,0.927453163534563,"STAMBP",1
GO:0016338,"GO:0016338","calcium-independent cell-cell adhesion via plasma membrane cell-adhesion molecules","1/473","10/11852",0.334641107061315,0.334641107061315,0.927453163534563,"CLDN23",1
GO:0018095,"GO:0018095","protein polyglutamylation","1/473","10/11852",0.334641107061315,0.334641107061315,0.927453163534563,"TPGS2",1
GO:0018202,"GO:0018202","peptidyl-histidine modification","1/473","10/11852",0.334641107061315,0.334641107061315,0.927453163534563,"DPH6",1
GO:0030422,"GO:0030422","production of siRNA involved in RNA interference","1/473","10/11852",0.334641107061315,0.334641107061315,0.927453163534563,"HENMT1",1
GO:0030948,"GO:0030948","negative regulation of vascular endothelial growth factor receptor signaling pathway","1/473","10/11852",0.334641107061315,0.334641107061315,0.927453163534563,"CADM4",1
GO:0031000,"GO:0031000","response to caffeine","1/473","10/11852",0.334641107061315,0.334641107061315,0.927453163534563,"TMEM38B",1
GO:0032098,"GO:0032098","regulation of appetite","1/473","10/11852",0.334641107061315,0.334641107061315,0.927453163534563,"BBS2",1
GO:0033008,"GO:0033008","positive regulation of mast cell activation involved in immune response","1/473","10/11852",0.334641107061315,0.334641107061315,0.927453163534563,"STXBP1",1
GO:0034454,"GO:0034454","microtubule anchoring at centrosome","1/473","10/11852",0.334641107061315,0.334641107061315,0.927453163534563,"HOOK3",1
GO:0035743,"GO:0035743","CD4-positive, alpha-beta T cell cytokine production","1/473","10/11852",0.334641107061315,0.334641107061315,0.927453163534563,"IL18",1
GO:0036270,"GO:0036270","response to diuretic","1/473","10/11852",0.334641107061315,0.334641107061315,0.927453163534563,"TMEM38B",1
GO:0043011,"GO:0043011","myeloid dendritic cell differentiation","1/473","10/11852",0.334641107061315,0.334641107061315,0.927453163534563,"TGFBR2",1
GO:0043306,"GO:0043306","positive regulation of mast cell degranulation","1/473","10/11852",0.334641107061315,0.334641107061315,0.927453163534563,"STXBP1",1
GO:0044351,"GO:0044351","macropinocytosis","1/473","10/11852",0.334641107061315,0.334641107061315,0.927453163534563,"CARMIL1",1
GO:0045628,"GO:0045628","regulation of T-helper 2 cell differentiation","1/473","10/11852",0.334641107061315,0.334641107061315,0.927453163534563,"IL18",1
GO:0045955,"GO:0045955","negative regulation of calcium ion-dependent exocytosis","1/473","10/11852",0.334641107061315,0.334641107061315,0.927453163534563,"RAP1B",1
GO:0046710,"GO:0046710","GDP metabolic process","1/473","10/11852",0.334641107061315,0.334641107061315,0.927453163534563,"TJP2",1
GO:0048240,"GO:0048240","sperm capacitation","1/473","10/11852",0.334641107061315,0.334641107061315,0.927453163534563,"ABHD2",1
GO:0048739,"GO:0048739","cardiac muscle fiber development","1/473","10/11852",0.334641107061315,0.334641107061315,0.927453163534563,"ZMPSTE24",1
GO:0050665,"GO:0050665","hydrogen peroxide biosynthetic process","1/473","10/11852",0.334641107061315,0.334641107061315,0.927453163534563,"FYN",1
GO:0051013,"GO:0051013","microtubule severing","1/473","10/11852",0.334641107061315,0.334641107061315,0.927453163534563,"KATNAL1",1
GO:0051014,"GO:0051014","actin filament severing","1/473","10/11852",0.334641107061315,0.334641107061315,0.927453163534563,"GMFB",1
GO:0051954,"GO:0051954","positive regulation of amine transport","1/473","10/11852",0.334641107061315,0.334641107061315,0.927453163534563,"STXBP1",1
GO:0060259,"GO:0060259","regulation of feeding behavior","1/473","10/11852",0.334641107061315,0.334641107061315,0.927453163534563,"EIF2AK4",1
GO:0060439,"GO:0060439","trachea morphogenesis","1/473","10/11852",0.334641107061315,0.334641107061315,0.927453163534563,"TGFBR2",1
GO:0060766,"GO:0060766","negative regulation of androgen receptor signaling pathway","1/473","10/11852",0.334641107061315,0.334641107061315,0.927453163534563,"NCOR1",1
GO:0060767,"GO:0060767","epithelial cell proliferation involved in prostate gland development","1/473","10/11852",0.334641107061315,0.334641107061315,0.927453163534563,"CDKN1B",1
GO:0060973,"GO:0060973","cell migration involved in heart development","1/473","10/11852",0.334641107061315,0.334641107061315,0.927453163534563,"FLRT3",1
GO:0060992,"GO:0060992","response to fungicide","1/473","10/11852",0.334641107061315,0.334641107061315,0.927453163534563,"KDM5B",1
GO:0070071,"GO:0070071","proton-transporting two-sector ATPase complex assembly","1/473","10/11852",0.334641107061315,0.334641107061315,0.927453163534563,"ATP23",1
GO:0070106,"GO:0070106","interleukin-27-mediated signaling pathway","1/473","10/11852",0.334641107061315,0.334641107061315,0.927453163534563,"STAT1",1
GO:0070757,"GO:0070757","interleukin-35-mediated signaling pathway","1/473","10/11852",0.334641107061315,0.334641107061315,0.927453163534563,"STAT1",1
GO:0075522,"GO:0075522","IRES-dependent viral translational initiation","1/473","10/11852",0.334641107061315,0.334641107061315,0.927453163534563,"MCTS1",1
GO:0090557,"GO:0090557","establishment of endothelial intestinal barrier","1/473","10/11852",0.334641107061315,0.334641107061315,0.927453163534563,"TJP2",1
GO:0097468,"GO:0097468","programmed cell death in response to reactive oxygen species","1/473","10/11852",0.334641107061315,0.334641107061315,0.927453163534563,"HDAC6",1
GO:0099640,"GO:0099640","axo-dendritic protein transport","1/473","10/11852",0.334641107061315,0.334641107061315,0.927453163534563,"PURA",1
GO:0150011,"GO:0150011","regulation of neuron projection arborization","1/473","10/11852",0.334641107061315,0.334641107061315,0.927453163534563,"MAP3K13",1
GO:1902065,"GO:1902065","response to L-glutamate","1/473","10/11852",0.334641107061315,0.334641107061315,0.927453163534563,"FYN",1
GO:1903054,"GO:1903054","negative regulation of extracellular matrix organization","1/473","10/11852",0.334641107061315,0.334641107061315,0.927453163534563,"DPP4",1
GO:1904526,"GO:1904526","regulation of microtubule binding","1/473","10/11852",0.334641107061315,0.334641107061315,0.927453163534563,"GAS8",1
GO:1904896,"GO:1904896","ESCRT complex disassembly","1/473","10/11852",0.334641107061315,0.334641107061315,0.927453163534563,"CHMP1B",1
GO:1904903,"GO:1904903","ESCRT III complex disassembly","1/473","10/11852",0.334641107061315,0.334641107061315,0.927453163534563,"CHMP1B",1
GO:1905146,"GO:1905146","lysosomal protein catabolic process","1/473","10/11852",0.334641107061315,0.334641107061315,0.927453163534563,"LDLR",1
GO:1905245,"GO:1905245","regulation of aspartic-type peptidase activity","1/473","10/11852",0.334641107061315,0.334641107061315,0.927453163534563,"SORL1",1
GO:1905939,"GO:1905939","regulation of gonad development","1/473","10/11852",0.334641107061315,0.334641107061315,0.927453163534563,"SEMA3A",1
GO:2000009,"GO:2000009","negative regulation of protein localization to cell surface","1/473","10/11852",0.334641107061315,0.334641107061315,0.927453163534563,"ARF6",1
GO:2001269,"GO:2001269","positive regulation of cysteine-type endopeptidase activity involved in apoptotic signaling pathway","1/473","10/11852",0.334641107061315,0.334641107061315,0.927453163534563,"CASP8",1
GO:0006650,"GO:0006650","glycerophospholipid metabolic process","12/473","258/11852",0.334710322930346,0.334710322930346,0.927453163534563,"MBOAT1/SOCS6/PIGB/PIK3CG/SYNJ2/PIGM/LDLR/AGPAT4/ABHD3/LIPH/PLEKHA2/PNPLA8",12
GO:0006469,"GO:0006469","negative regulation of protein kinase activity","9/473","188/11852",0.336396144849279,0.336396144849279,0.927453163534563,"ILK/TSG101/STK38/GNAQ/SORL1/GMFB/PRKAR1A/CDKN2C/CDKN1B",9
GO:0055088,"GO:0055088","lipid homeostasis","5/473","96/11852",0.337361576939077,0.337361576939077,0.927453163534563,"ACOX1/THADA/TTC39B/LDLR/IL18",5
GO:0006482,"GO:0006482","protein demethylation","2/473","30/11852",0.337882655804121,0.337882655804121,0.927453163534563,"KDM5B/JARID2",2
GO:0006505,"GO:0006505","GPI anchor metabolic process","2/473","30/11852",0.337882655804121,0.337882655804121,0.927453163534563,"PIGB/PIGM",2
GO:0006654,"GO:0006654","phosphatidic acid biosynthetic process","2/473","30/11852",0.337882655804121,0.337882655804121,0.927453163534563,"AGPAT4/LIPH",2
GO:0007566,"GO:0007566","embryo implantation","2/473","30/11852",0.337882655804121,0.337882655804121,0.927453163534563,"TGFBR2/VMP1",2
GO:0008214,"GO:0008214","protein dealkylation","2/473","30/11852",0.337882655804121,0.337882655804121,0.927453163534563,"KDM5B/JARID2",2
GO:0009583,"GO:0009583","detection of light stimulus","2/473","30/11852",0.337882655804121,0.337882655804121,0.927453163534563,"GNAQ/CALM1",2
GO:0010559,"GO:0010559","regulation of glycoprotein biosynthetic process","2/473","30/11852",0.337882655804121,0.337882655804121,0.927453163534563,"GOLGA2/TMEM59",2
GO:0021545,"GO:0021545","cranial nerve development","2/473","30/11852",0.337882655804121,0.337882655804121,0.927453163534563,"NRP1/SEMA3A",2
GO:0031297,"GO:0031297","replication fork processing","2/473","30/11852",0.337882655804121,0.337882655804121,0.927453163534563,"SAMHD1/PRIMPOL",2
GO:0031572,"GO:0031572","G2 DNA damage checkpoint","2/473","30/11852",0.337882655804121,0.337882655804121,0.927453163534563,"ABRAXAS1/CDC14B",2
GO:0042455,"GO:0042455","ribonucleoside biosynthetic process","2/473","30/11852",0.337882655804121,0.337882655804121,0.927453163534563,"PRTFDC1/NME7",2
GO:0051693,"GO:0051693","actin filament capping","2/473","30/11852",0.337882655804121,0.337882655804121,0.927453163534563,"CARMIL1/MTPN",2
GO:0061842,"GO:0061842","microtubule organizing center localization","2/473","30/11852",0.337882655804121,0.337882655804121,0.927453163534563,"GPSM2/ASPM",2
GO:0070536,"GO:0070536","protein K63-linked deubiquitination","2/473","30/11852",0.337882655804121,0.337882655804121,0.927453163534563,"STAMBP/ATXN3",2
GO:0070741,"GO:0070741","response to interleukin-6","2/473","30/11852",0.337882655804121,0.337882655804121,0.927453163534563,"SMAD4/STAT1",2
GO:0071320,"GO:0071320","cellular response to cAMP","2/473","30/11852",0.337882655804121,0.337882655804121,0.927453163534563,"PIK3CG/RAP1B",2
GO:1900026,"GO:1900026","positive regulation of substrate adhesion-dependent cell spreading","2/473","30/11852",0.337882655804121,0.337882655804121,0.927453163534563,"CARMIL1/NRP1",2
GO:0050807,"GO:0050807","regulation of synapse organization","7/473","142/11852",0.338908132552627,0.338908132552627,0.927453163534563,"CDKL5/FLRT3/ZMYND8/ABHD17C/FYN/PTK2/ARF6",7
GO:0042176,"GO:0042176","regulation of protein catabolic process","15/473","330/11852",0.339236658954046,0.339236658954046,0.927453163534563,"USP19/FYN/FBXL5/CUL4B/SORL1/LDLR/PTK2/MDM2/ERLEC1/RNFT1/ATXN3/ARNTL/GABARAPL2/CDKN1B/PBK",15
GO:0009165,"GO:0009165","nucleotide biosynthetic process","13/473","283/11852",0.3412074845739,0.3412074845739,0.927453163534563,"NCOR1/ACSS2/ADCY7/PDK4/PGM2L1/AGPAT4/DCAKD/ME1/PDP1/MTHFD2L/NUDT12/NME7/PPCS",13
GO:0061982,"GO:0061982","meiosis I cell cycle process","4/473","74/11852",0.341987345300378,0.341987345300378,0.927453163534563,"CDC25B/AGO4/CDC25C/MLH3",4
GO:0006643,"GO:0006643","membrane lipid metabolic process","8/473","166/11852",0.343979914150267,0.343979914150267,0.927453163534563,"SGPP2/GM2A/PIGB/PIGM/SCCPDH/B3GALT4/CYP1B1/VAPA",8
GO:0070661,"GO:0070661","leukocyte proliferation","8/473","166/11852",0.343979914150267,0.343979914150267,0.927453163534563,"VAV3/PIK3CG/PDE5A/FYN/PURA/TGFBR2/PRKAR1A/IL18",8
GO:0030510,"GO:0030510","regulation of BMP signaling pathway","3/473","52/11852",0.344088779480012,0.344088779480012,0.927453163534563,"ILK/SMAD4/SORL1",3
GO:0030521,"GO:0030521","androgen receptor signaling pathway","3/473","52/11852",0.344088779480012,0.344088779480012,0.927453163534563,"NCOR1/HDAC6/NCOA3",3
GO:0061951,"GO:0061951","establishment of protein localization to plasma membrane","3/473","52/11852",0.344088779480012,0.344088779480012,0.927453163534563,"GOLPH3L/BBS2/RAB10",3
GO:1902099,"GO:1902099","regulation of metaphase/anaphase transition of cell cycle","3/473","52/11852",0.344088779480012,0.344088779480012,0.927453163534563,"TTK/BUB1/NDC80",3
GO:0008643,"GO:0008643","carbohydrate transport","5/473","97/11852",0.345326067469773,0.345326067469773,0.927453163534563,"SLC17A5/SORBS1/RTN2/AQP3/CREBL2",5
GO:0030330,"GO:0030330","DNA damage response, signal transduction by p53 class mediator","5/473","97/11852",0.345326067469773,0.345326067469773,0.927453163534563,"CDC25C/MDM2/SOX4/CDKN1B/ZMPSTE24",5
GO:0071772,"GO:0071772","response to BMP","5/473","97/11852",0.345326067469773,0.345326067469773,0.927453163534563,"ILK/SMAD4/ZNF8/SORL1/UBE2D1",5
GO:0071773,"GO:0071773","cellular response to BMP stimulus","5/473","97/11852",0.345326067469773,0.345326067469773,0.927453163534563,"ILK/SMAD4/ZNF8/SORL1/UBE2D1",5
GO:0017157,"GO:0017157","regulation of exocytosis","7/473","143/11852",0.345428908925242,0.345428908925242,0.927453163534563,"STXBP6/TSG101/STXBP1/PDCD6IP/RAP1B/RALB/RAB10",7
GO:0001558,"GO:0001558","regulation of cell growth","14/473","308/11852",0.34694318628889,0.34694318628889,0.927453163534563,"APBB2/ILK/SMAD4/CDKL5/TSG101/RUFY3/SMARCA2/MAP3K13/NRP1/MTPN/CDKN2C/CDKN1B/CDKN2AIP/SEMA3A",14
GO:0010506,"GO:0010506","regulation of autophagy","13/473","285/11852",0.350438381894615,0.350438381894615,0.927453163534563,"HDAC6/GOLGA2/EIF2AK4/PTK2/RRAGA/XPA/PAFAH1B2/TMEM59/ATP6V1A/RALB/DRAM2/SCOC/ZMPSTE24",13
GO:0016079,"GO:0016079","synaptic vesicle exocytosis","4/473","75/11852",0.351139726672714,0.351139726672714,0.927453163534563,"STXBP1/STX2/RAP1B/SNAP23",4
GO:0048738,"GO:0048738","cardiac muscle tissue development","7/473","144/11852",0.351964384283143,0.351964384283143,0.927453163534563,"FKBP1A/SMAD4/SGCB/JARID2/TGFBR2/PRKAR1A/ZMPSTE24",7
GO:0060759,"GO:0060759","regulation of response to cytokine stimulus","7/473","144/11852",0.351964384283143,0.351964384283143,0.927453163534563,"MADD/CASP8/RFFL/MAVS/SAMHD1/STAT1/TRIM6",7
GO:0006636,"GO:0006636","unsaturated fatty acid biosynthetic process","2/473","31/11852",0.352570143322494,0.352570143322494,0.927453163534563,"CBR1/PNPLA8",2
GO:0008038,"GO:0008038","neuron recognition","2/473","31/11852",0.352570143322494,0.352570143322494,0.927453163534563,"NRP1/SEMA3A",2
GO:0021879,"GO:0021879","forebrain neuron differentiation","2/473","31/11852",0.352570143322494,0.352570143322494,0.927453163534563,"NRP1/SEMA3A",2
GO:0032722,"GO:0032722","positive regulation of chemokine production","2/473","31/11852",0.352570143322494,0.352570143322494,0.927453163534563,"MAVS/EIF2AK2",2
GO:0032885,"GO:0032885","regulation of polysaccharide biosynthetic process","2/473","31/11852",0.352570143322494,0.352570143322494,0.927453163534563,"SORBS1/EPM2AIP1",2
GO:0042026,"GO:0042026","protein refolding","2/473","31/11852",0.352570143322494,0.352570143322494,0.927453163534563,"FKBP1A/PPIC",2
GO:0042551,"GO:0042551","neuron maturation","2/473","31/11852",0.352570143322494,0.352570143322494,0.927453163534563,"ANKS1A/MAP3K13",2
GO:0042743,"GO:0042743","hydrogen peroxide metabolic process","2/473","31/11852",0.352570143322494,0.352570143322494,0.927453163534563,"HDAC6/FYN",2
GO:0043331,"GO:0043331","response to dsRNA","2/473","31/11852",0.352570143322494,0.352570143322494,0.927453163534563,"MAVS/RALB",2
GO:0046473,"GO:0046473","phosphatidic acid metabolic process","2/473","31/11852",0.352570143322494,0.352570143322494,0.927453163534563,"AGPAT4/LIPH",2
GO:0055010,"GO:0055010","ventricular cardiac muscle tissue morphogenesis","2/473","31/11852",0.352570143322494,0.352570143322494,0.927453163534563,"FKBP1A/SMAD4",2
GO:1903053,"GO:1903053","regulation of extracellular matrix organization","2/473","31/11852",0.352570143322494,0.352570143322494,0.927453163534563,"DPP4/PHLDB2",2
GO:1903672,"GO:1903672","positive regulation of sprouting angiogenesis","2/473","31/11852",0.352570143322494,0.352570143322494,0.927453163534563,"MAP3K3/NRP1",2
GO:1903727,"GO:1903727","positive regulation of phospholipid metabolic process","2/473","31/11852",0.352570143322494,0.352570143322494,0.927453163534563,"VAV3/PTK2",2
GO:0002274,"GO:0002274","myeloid leukocyte activation","20/473","453/11852",0.352653326427734,0.352653326427734,0.927453163534563,"UBR4/MYO18A/GM2A/PIK3CG/RAB6A/STXBP1/LDLR/TGFBR2/RAP1B/PAFAH1B2/ACTR10/SNAP23/GGH/NDUFC2/VAPA/METTL7A/RAB10/IL18/CD58/C6orf120",20
GO:1903364,"GO:1903364","positive regulation of cellular protein catabolic process","6/473","121/11852",0.35322395583108,0.35322395583108,0.927453163534563,"FBXL5/LDLR/PTK2/MDM2/RNFT1/ATXN3",6
GO:0042110,"GO:0042110","T cell activation","13/473","286/11852",0.355071094100392,0.355071094100392,0.927453163534563,"FKBP1A/DPP4/KIF13B/EIF2AK4/SOCS6/PIK3CG/PDE5A/FYN/CASP8/TGFBR2/PRKAR1A/SOX4/IL18",13
GO:0003333,"GO:0003333","amino acid transmembrane transport","3/473","53/11852",0.355113374985174,0.355113374985174,0.927453163534563,"SLC38A2/SLC38A6/ARL6IP5",3
GO:0042632,"GO:0042632","cholesterol homeostasis","3/473","53/11852",0.355113374985174,0.355113374985174,0.927453163534563,"TTC39B/LDLR/IL18",3
GO:0043647,"GO:0043647","inositol phosphate metabolic process","3/473","53/11852",0.355113374985174,0.355113374985174,0.927453163534563,"PLCH1/SYNJ2/CALM1",3
GO:0006164,"GO:0006164","purine nucleotide biosynthetic process","10/473","215/11852",0.35578226136768,0.35578226136768,0.927453163534563,"NCOR1/ACSS2/ADCY7/PDK4/PGM2L1/DCAKD/PDP1/MTHFD2L/NME7/PPCS",10
GO:0046486,"GO:0046486","glycerolipid metabolic process","14/473","310/11852",0.355839244754703,0.355839244754703,0.927453163534563,"MBOAT1/SOCS6/PIGB/PIK3CG/SORL1/SYNJ2/PIGM/LDLR/AGPAT4/ABHD2/ABHD3/LIPH/PLEKHA2/PNPLA8",14
GO:0007409,"GO:0007409","axonogenesis","15/473","334/11852",0.356346624544878,0.356346624544878,0.927453163534563,"APBB2/HDAC6/ILK/SMAD4/CDKL5/FLRT3/KIF13B/RUFY3/FYN/MAP3K13/STXBP1/NRP1/PTK2/RAB10/SEMA3A",15
GO:0120032,"GO:0120032","regulation of plasma membrane bounded cell projection assembly","7/473","145/11852",0.358512577028959,0.358512577028959,0.927453163534563,"CDKL5/ZMYND8/DYNC2LI1/NRP1/ODF2L/TCTEX1D2/ARF6",7
GO:1901293,"GO:1901293","nucleoside phosphate biosynthetic process","13/473","287/11852",0.359714378375155,0.359714378375155,0.927453163534563,"NCOR1/ACSS2/ADCY7/PDK4/PGM2L1/AGPAT4/DCAKD/ME1/PDP1/MTHFD2L/NUDT12/NME7/PPCS",13
GO:0030038,"GO:0030038","contractile actin filament bundle assembly","4/473","76/11852",0.360293791849044,0.360293791849044,0.927453163534563,"PHLDB2/SORBS1/CARMIL1/NRP1",4
GO:0034333,"GO:0034333","adherens junction assembly","4/473","76/11852",0.360293791849044,0.360293791849044,0.927453163534563,"PHLDB2/SORBS1/NRP1/PTK2",4
GO:0034763,"GO:0034763","negative regulation of transmembrane transport","4/473","76/11852",0.360293791849044,0.360293791849044,0.927453163534563,"THADA/CALM2/ARL6IP5/CALM1",4
GO:0043149,"GO:0043149","stress fiber assembly","4/473","76/11852",0.360293791849044,0.360293791849044,0.927453163534563,"PHLDB2/SORBS1/CARMIL1/NRP1",4
GO:0051196,"GO:0051196","regulation of coenzyme metabolic process","4/473","76/11852",0.360293791849044,0.360293791849044,0.927453163534563,"NCOR1/PDK4/ME1/PDP1",4
GO:0072384,"GO:0072384","organelle transport along microtubule","4/473","76/11852",0.360293791849044,0.360293791849044,0.927453163534563,"RAB6A/KIF3C/ACTR10/KIFAP3",4
GO:1903363,"GO:1903363","negative regulation of cellular protein catabolic process","4/473","76/11852",0.360293791849044,0.360293791849044,0.927453163534563,"USP19/ERLEC1/GABARAPL2/PBK",4
GO:1905897,"GO:1905897","regulation of response to endoplasmic reticulum stress","4/473","76/11852",0.360293791849044,0.360293791849044,0.927453163534563,"USP19/ERLEC1/RNFT1/ATXN3",4
GO:0048871,"GO:0048871","multicellular organismal homeostasis","14/473","311/11852",0.360302699351901,0.360302699351901,0.927453163534563,"ACOT13/ADCY7/F2R/PDK4/AQP3/PRKAR1A/LGR4/BBS2/BBS10/SNX10/OMA1/ARNTL/IL18/DRAM2",14
GO:0010770,"GO:0010770","positive regulation of cell morphogenesis involved in differentiation","6/473","122/11852",0.360388567225992,0.360388567225992,0.927453163534563,"ILK/CDKL5/RUFY3/MAP3K13/CARMIL1/NRP1",6
GO:0006644,"GO:0006644","phospholipid metabolic process","15/473","335/11852",0.360649618915311,0.360649618915311,0.927453163534563,"MBOAT1/SOCS6/PIGB/VAV3/PIK3CG/SYNJ2/PIGM/LDLR/AGPAT4/PTK2/ABHD3/TMEM38B/LIPH/PLEKHA2/PNPLA8",15
GO:0000183,"GO:0000183","chromatin silencing at rDNA","1/473","11/11852",0.361217256053039,0.361217256053039,0.927453163534563,"MBD2",1
GO:0002507,"GO:0002507","tolerance induction","1/473","11/11852",0.361217256053039,0.361217256053039,0.927453163534563,"TGFBR2",1
GO:0002675,"GO:0002675","positive regulation of acute inflammatory response","1/473","11/11852",0.361217256053039,0.361217256053039,0.927453163534563,"PIK3CG",1
GO:0002730,"GO:0002730","regulation of dendritic cell cytokine production","1/473","11/11852",0.361217256053039,0.361217256053039,0.927453163534563,"MAVS",1
GO:0002827,"GO:0002827","positive regulation of T-helper 1 type immune response","1/473","11/11852",0.361217256053039,0.361217256053039,0.927453163534563,"IL18",1
GO:0003094,"GO:0003094","glomerular filtration","1/473","11/11852",0.361217256053039,0.361217256053039,0.927453163534563,"F2R",1
GO:0006012,"GO:0006012","galactose metabolic process","1/473","11/11852",0.361217256053039,0.361217256053039,0.927453163534563,"PGM2L1",1
GO:0006241,"GO:0006241","CTP biosynthetic process","1/473","11/11852",0.361217256053039,0.361217256053039,0.927453163534563,"NME7",1
GO:0006465,"GO:0006465","signal peptide processing","1/473","11/11852",0.361217256053039,0.361217256053039,0.927453163534563,"SEC11C",1
GO:0007077,"GO:0007077","mitotic nuclear envelope disassembly","1/473","11/11852",0.361217256053039,0.361217256053039,0.927453163534563,"CCNB2",1
GO:0007213,"GO:0007213","G protein-coupled acetylcholine receptor signaling pathway","1/473","11/11852",0.361217256053039,0.361217256053039,0.927453163534563,"GNAQ",1
GO:0008340,"GO:0008340","determination of adult lifespan","1/473","11/11852",0.361217256053039,0.361217256053039,0.927453163534563,"ZMPSTE24",1
GO:0009151,"GO:0009151","purine deoxyribonucleotide metabolic process","1/473","11/11852",0.361217256053039,0.361217256053039,0.927453163534563,"SAMHD1",1
GO:0010561,"GO:0010561","negative regulation of glycoprotein biosynthetic process","1/473","11/11852",0.361217256053039,0.361217256053039,0.927453163534563,"TMEM59",1
GO:0010867,"GO:0010867","positive regulation of triglyceride biosynthetic process","1/473","11/11852",0.361217256053039,0.361217256053039,0.927453163534563,"LDLR",1
GO:0010870,"GO:0010870","positive regulation of receptor biosynthetic process","1/473","11/11852",0.361217256053039,0.361217256053039,0.927453163534563,"HDAC6",1
GO:0010885,"GO:0010885","regulation of cholesterol storage","1/473","11/11852",0.361217256053039,0.361217256053039,0.927453163534563,"TTC39B",1
GO:0019896,"GO:0019896","axonal transport of mitochondrion","1/473","11/11852",0.361217256053039,0.361217256053039,0.927453163534563,"ACTR10",1
GO:0030431,"GO:0030431","sleep","1/473","11/11852",0.361217256053039,0.361217256053039,0.927453163534563,"IL18",1
GO:0030836,"GO:0030836","positive regulation of actin filament depolymerization","1/473","11/11852",0.361217256053039,0.361217256053039,0.927453163534563,"CARMIL1",1
GO:0031342,"GO:0031342","negative regulation of cell killing","1/473","11/11852",0.361217256053039,0.361217256053039,0.927453163534563,"SERPINB9",1
GO:0032026,"GO:0032026","response to magnesium ion","1/473","11/11852",0.361217256053039,0.361217256053039,0.927453163534563,"MDM2",1
GO:0032460,"GO:0032460","negative regulation of protein oligomerization","1/473","11/11852",0.361217256053039,0.361217256053039,0.927453163534563,"SORL1",1
GO:0032780,"GO:0032780","negative regulation of ATPase activity","1/473","11/11852",0.361217256053039,0.361217256053039,0.927453163534563,"THADA",1
GO:0034331,"GO:0034331","cell junction maintenance","1/473","11/11852",0.361217256053039,0.361217256053039,0.927453163534563,"F2R",1
GO:0034368,"GO:0034368","protein-lipid complex remodeling","1/473","11/11852",0.361217256053039,0.361217256053039,0.927453163534563,"ABCA5",1
GO:0034369,"GO:0034369","plasma lipoprotein particle remodeling","1/473","11/11852",0.361217256053039,0.361217256053039,0.927453163534563,"ABCA5",1
GO:0034497,"GO:0034497","protein localization to phagophore assembly site","1/473","11/11852",0.361217256053039,0.361217256053039,0.927453163534563,"WIPI1",1
GO:0040015,"GO:0040015","negative regulation of multicellular organism growth","1/473","11/11852",0.361217256053039,0.361217256053039,0.927453163534563,"BBS2",1
GO:0042044,"GO:0042044","fluid transport","1/473","11/11852",0.361217256053039,0.361217256053039,0.927453163534563,"AQP3",1
GO:0043518,"GO:0043518","negative regulation of DNA damage response, signal transduction by p53 class mediator","1/473","11/11852",0.361217256053039,0.361217256053039,0.927453163534563,"MDM2",1
GO:0043970,"GO:0043970","histone H3-K9 acetylation","1/473","11/11852",0.361217256053039,0.361217256053039,0.927453163534563,"SMAD4",1
GO:0045064,"GO:0045064","T-helper 2 cell differentiation","1/473","11/11852",0.361217256053039,0.361217256053039,0.927453163534563,"IL18",1
GO:0045475,"GO:0045475","locomotor rhythm","1/473","11/11852",0.361217256053039,0.361217256053039,0.927453163534563,"NCOR1",1
GO:0045618,"GO:0045618","positive regulation of keratinocyte differentiation","1/473","11/11852",0.361217256053039,0.361217256053039,0.927453163534563,"NCOA3",1
GO:0045651,"GO:0045651","positive regulation of macrophage differentiation","1/473","11/11852",0.361217256053039,0.361217256053039,0.927453163534563,"CASP8",1
GO:0046036,"GO:0046036","CTP metabolic process","1/473","11/11852",0.361217256053039,0.361217256053039,0.927453163534563,"NME7",1
GO:0046479,"GO:0046479","glycosphingolipid catabolic process","1/473","11/11852",0.361217256053039,0.361217256053039,0.927453163534563,"GM2A",1
GO:0051547,"GO:0051547","regulation of keratinocyte migration","1/473","11/11852",0.361217256053039,0.361217256053039,0.927453163534563,"ARF6",1
GO:0051770,"GO:0051770","positive regulation of nitric-oxide synthase biosynthetic process","1/473","11/11852",0.361217256053039,0.361217256053039,0.927453163534563,"STAT1",1
GO:0055119,"GO:0055119","relaxation of cardiac muscle","1/473","11/11852",0.361217256053039,0.361217256053039,0.927453163534563,"PDE5A",1
GO:0060339,"GO:0060339","negative regulation of type I interferon-mediated signaling pathway","1/473","11/11852",0.361217256053039,0.361217256053039,0.927453163534563,"SAMHD1",1
GO:0060391,"GO:0060391","positive regulation of SMAD protein signal transduction","1/473","11/11852",0.361217256053039,0.361217256053039,0.927453163534563,"SMAD4",1
GO:0060977,"GO:0060977","coronary vasculature morphogenesis","1/473","11/11852",0.361217256053039,0.361217256053039,0.927453163534563,"NRP1",1
GO:0070601,"GO:0070601","centromeric sister chromatid cohesion","1/473","11/11852",0.361217256053039,0.361217256053039,0.927453163534563,"BUB1",1
GO:0070831,"GO:0070831","basement membrane assembly","1/473","11/11852",0.361217256053039,0.361217256053039,0.927453163534563,"PHLDB2",1
GO:0071679,"GO:0071679","commissural neuron axon guidance","1/473","11/11852",0.361217256053039,0.361217256053039,0.927453163534563,"NRP1",1
GO:0072077,"GO:0072077","renal vesicle morphogenesis","1/473","11/11852",0.361217256053039,0.361217256053039,0.927453163534563,"STAT1",1
GO:0072182,"GO:0072182","regulation of nephron tubule epithelial cell differentiation","1/473","11/11852",0.361217256053039,0.361217256053039,0.927453163534563,"STAT1",1
GO:0080154,"GO:0080154","regulation of fertilization","1/473","11/11852",0.361217256053039,0.361217256053039,0.927453163534563,"STXBP1",1
GO:0090042,"GO:0090042","tubulin deacetylation","1/473","11/11852",0.361217256053039,0.361217256053039,0.927453163534563,"HDAC6",1
GO:0090073,"GO:0090073","positive regulation of protein homodimerization activity","1/473","11/11852",0.361217256053039,0.361217256053039,0.927453163534563,"ARF6",1
GO:0090185,"GO:0090185","negative regulation of kidney development","1/473","11/11852",0.361217256053039,0.361217256053039,0.927453163534563,"STAT1",1
GO:0090239,"GO:0090239","regulation of histone H4 acetylation","1/473","11/11852",0.361217256053039,0.361217256053039,0.927453163534563,"ZMPSTE24",1
GO:1900016,"GO:1900016","negative regulation of cytokine production involved in inflammatory response","1/473","11/11852",0.361217256053039,0.361217256053039,0.927453163534563,"ADCY7",1
GO:1900402,"GO:1900402","regulation of carbohydrate metabolic process by regulation of transcription from RNA polymerase II promoter","1/473","11/11852",0.361217256053039,0.361217256053039,0.927453163534563,"NCOR1",1
GO:1901070,"GO:1901070","guanosine-containing compound biosynthetic process","1/473","11/11852",0.361217256053039,0.361217256053039,0.927453163534563,"NME7",1
GO:1901626,"GO:1901626","regulation of postsynaptic membrane organization","1/473","11/11852",0.361217256053039,0.361217256053039,0.927453163534563,"ZMYND8",1
GO:1902018,"GO:1902018","negative regulation of cilium assembly","1/473","11/11852",0.361217256053039,0.361217256053039,0.927453163534563,"ODF2L",1
GO:1902430,"GO:1902430","negative regulation of amyloid-beta formation","1/473","11/11852",0.361217256053039,0.361217256053039,0.927453163534563,"SORL1",1
GO:1903651,"GO:1903651","positive regulation of cytoplasmic transport","1/473","11/11852",0.361217256053039,0.361217256053039,0.927453163534563,"SORL1",1
GO:1904925,"GO:1904925","positive regulation of autophagy of mitochondrion in response to mitochondrial depolarization","1/473","11/11852",0.361217256053039,0.361217256053039,0.927453163534563,"HDAC6",1
GO:1905048,"GO:1905048","regulation of metallopeptidase activity","1/473","11/11852",0.361217256053039,0.361217256053039,0.927453163534563,"SORL1",1
GO:2000251,"GO:2000251","positive regulation of actin cytoskeleton reorganization","1/473","11/11852",0.361217256053039,0.361217256053039,0.927453163534563,"NRP1",1
GO:2000786,"GO:2000786","positive regulation of autophagosome assembly","1/473","11/11852",0.361217256053039,0.361217256053039,0.927453163534563,"RALB",1
GO:0072006,"GO:0072006","nephron development","5/473","99/11852",0.361287027976422,0.361287027976422,0.927453163534563,"ILK/PBX1/SMAD4/STAT1/LGR4",5
GO:0001933,"GO:0001933","negative regulation of protein phosphorylation","15/473","336/11852",0.364961701241066,0.364961701241066,0.927453163534563,"NCOR1/ILK/SMAD4/CADM4/TSG101/STK38/GNAQ/SORL1/GMFB/PRKAR1A/CALM2/CDKN2C/CALM1/CDKN1B/PBK",15
GO:0006479,"GO:0006479","protein methylation","7/473","146/11852",0.365071521978626,0.365071521978626,0.927453163534563,"SMAD4/EEF1AKMT2/RAB6A/JARID2/EEF1AKMT1/PCMT1/PCMTD1",7
GO:0008213,"GO:0008213","protein alkylation","7/473","146/11852",0.365071521978626,0.365071521978626,0.927453163534563,"SMAD4/EEF1AKMT2/RAB6A/JARID2/EEF1AKMT1/PCMT1/PCMTD1",7
GO:0007091,"GO:0007091","metaphase/anaphase transition of mitotic cell cycle","3/473","54/11852",0.366113933442825,0.366113933442825,0.927453163534563,"TTK/BUB1/NDC80",3
GO:0007189,"GO:0007189","adenylate cyclase-activating G protein-coupled receptor signaling pathway","3/473","54/11852",0.366113933442825,0.366113933442825,0.927453163534563,"ADCY7/GNAQ/LGR4",3
GO:0031670,"GO:0031670","cellular response to nutrient","3/473","54/11852",0.366113933442825,0.366113933442825,0.927453163534563,"KANK2/FYN/MDM2",3
GO:0044070,"GO:0044070","regulation of anion transport","3/473","54/11852",0.366113933442825,0.366113933442825,0.927453163534563,"NCOR1/STXBP1/ARL6IP5",3
GO:0055092,"GO:0055092","sterol homeostasis","3/473","54/11852",0.366113933442825,0.366113933442825,0.927453163534563,"TTC39B/LDLR/IL18",3
GO:0110110,"GO:0110110","positive regulation of animal organ morphogenesis","3/473","54/11852",0.366113933442825,0.366113933442825,0.927453163534563,"SMAD4/TGFBR2/LGR4",3
GO:1901880,"GO:1901880","negative regulation of protein depolymerization","3/473","54/11852",0.366113933442825,0.366113933442825,0.927453163534563,"HDAC6/CARMIL1/MTPN",3
GO:1990266,"GO:1990266","neutrophil migration","3/473","54/11852",0.366113933442825,0.366113933442825,0.927453163534563,"VAV3/IRAK4/PIK3CG",3
GO:0002711,"GO:0002711","positive regulation of T cell mediated immunity","2/473","32/11852",0.367142493330501,0.367142493330501,0.927453163534563,"STX7/IL18",2
GO:0003416,"GO:0003416","endochondral bone growth","2/473","32/11852",0.367142493330501,0.367142493330501,0.927453163534563,"TGFBR2/ZMPSTE24",2
GO:0006734,"GO:0006734","NADH metabolic process","2/473","32/11852",0.367142493330501,0.367142493330501,0.927453163534563,"PGM2L1/NUDT12",2
GO:0009311,"GO:0009311","oligosaccharide metabolic process","2/473","32/11852",0.367142493330501,0.367142493330501,0.927453163534563,"GM2A/FUT8",2
GO:0010761,"GO:0010761","fibroblast migration","2/473","32/11852",0.367142493330501,0.367142493330501,0.927453163534563,"ILK/RFFL",2
GO:0030517,"GO:0030517","negative regulation of axon extension","2/473","32/11852",0.367142493330501,0.367142493330501,0.927453163534563,"NRP1/SEMA3A",2
GO:0031295,"GO:0031295","T cell costimulation","2/473","32/11852",0.367142493330501,0.367142493330501,0.927453163534563,"DPP4/FYN",2
GO:0040001,"GO:0040001","establishment of mitotic spindle localization","2/473","32/11852",0.367142493330501,0.367142493330501,0.927453163534563,"GPSM2/NDC80",2
GO:0042130,"GO:0042130","negative regulation of T cell proliferation","2/473","32/11852",0.367142493330501,0.367142493330501,0.927453163534563,"PDE5A/PRKAR1A",2
GO:0042558,"GO:0042558","pteridine-containing compound metabolic process","2/473","32/11852",0.367142493330501,0.367142493330501,0.927453163534563,"MTHFD2L/GGH",2
GO:0045104,"GO:0045104","intermediate filament cytoskeleton organization","2/473","32/11852",0.367142493330501,0.367142493330501,0.927453163534563,"EVPL/ATXN3",2
GO:0048641,"GO:0048641","regulation of skeletal muscle tissue development","2/473","32/11852",0.367142493330501,0.367142493330501,0.927453163534563,"USP19/ARNTL",2
GO:0050999,"GO:0050999","regulation of nitric-oxide synthase activity","2/473","32/11852",0.367142493330501,0.367142493330501,0.927453163534563,"ZDHHC21/CALM1",2
GO:0051294,"GO:0051294","establishment of spindle orientation","2/473","32/11852",0.367142493330501,0.367142493330501,0.927453163534563,"GPSM2/NDC80",2
GO:1900449,"GO:1900449","regulation of glutamate receptor signaling pathway","2/473","32/11852",0.367142493330501,0.367142493330501,0.927453163534563,"FYN/DLG3",2
GO:0016579,"GO:0016579","protein deubiquitination","11/473","241/11852",0.367742126474654,0.367742126474654,0.927453163534563,"SMAD4/USP19/STAMBP/ABRAXAS1/UCHL3/MINDY1/MDM2/UBE2D1/MINDY3/PSMD5/ATXN3",11
GO:0031647,"GO:0031647","regulation of protein stability","11/473","241/11852",0.367742126474654,0.367742126474654,0.927453163534563,"HDAC6/USP19/AAK1/GNAQ/STXBP1/ATF7IP/MDM2/SOX4/SUGT1/CREBL2/CDKN2AIP",11
GO:0050708,"GO:0050708","regulation of protein secretion","13/473","289/11852",0.369029853183895,0.369029853183895,0.927453163534563,"MYO18A/DPP4/FRMD8/F2R/ARL2BP/GOLPH3L/MAVS/LGR4/SOX4/TRIM6/ARNTL/ARF6/CD58",13
GO:0019079,"GO:0019079","viral genome replication","5/473","100/11852",0.369276529350273,0.369276529350273,0.927453163534563,"EIF2AK4/MAVS/EIF2AK2/TRIM6/VAPA",5
GO:0006639,"GO:0006639","acylglycerol metabolic process","4/473","77/11852",0.369444492061346,0.369444492061346,0.927453163534563,"PIK3CG/SORL1/LDLR/ABHD2",4
GO:0071383,"GO:0071383","cellular response to steroid hormone stimulus","9/473","194/11852",0.370425550247252,0.370425550247252,0.927453163534563,"NCOR1/HDAC6/KANK2/NCOA3/PGRMC2/ABHD2/CALCOCO1/UBA5/ARNTL",9
GO:0007033,"GO:0007033","vacuole organization","7/473","147/11852",0.371639271740776,0.371639271740776,0.927453163534563,"WIPI1/GABARAPL1/AKTIP/HOOK3/RALB/VMP1/GABARAPL2",7
GO:0060491,"GO:0060491","regulation of cell projection assembly","7/473","147/11852",0.371639271740776,0.371639271740776,0.927453163534563,"CDKL5/ZMYND8/DYNC2LI1/NRP1/ODF2L/TCTEX1D2/ARF6",7
GO:0010498,"GO:0010498","proteasomal protein catabolic process","19/473","434/11852",0.371837381806669,0.371837381806669,0.927453163534563,"USP19/ATE1/SOCS6/AMN1/FBXL5/CUL4B/UBE2H/RFFL/MDM2/ERLEC1/UBE2D1/RNFT1/PSMD5/ATXN3/ARNTL/PPP2R5C/GABARAPL2/TRIM2/PBK",19
GO:0008654,"GO:0008654","phospholipid biosynthetic process","10/473","218/11852",0.371895111220557,0.371895111220557,0.927453163534563,"MBOAT1/PIGB/PIK3CG/SYNJ2/PIGM/AGPAT4/ABHD3/TMEM38B/LIPH/PLEKHA2",10
GO:1903362,"GO:1903362","regulation of cellular protein catabolic process","10/473","218/11852",0.371895111220557,0.371895111220557,0.927453163534563,"USP19/FBXL5/LDLR/PTK2/MDM2/ERLEC1/RNFT1/ATXN3/GABARAPL2/PBK",10
GO:0042326,"GO:0042326","negative regulation of phosphorylation","16/473","362/11852",0.373327183600697,0.373327183600697,0.927453163534563,"NCOR1/ILK/SMAD4/CADM4/TSG101/STK38/GNAQ/SORL1/GMFB/PPP2R5A/PRKAR1A/CALM2/CDKN2C/CALM1/CDKN1B/PBK",16
GO:0035303,"GO:0035303","regulation of dephosphorylation","8/473","171/11852",0.374344431968374,0.374344431968374,0.927453163534563,"FKBP1A/RCAN3/DLG3/EIF2AK2/PPP2R5A/CALM2/CALM1/PPP2R5C",8
GO:0046434,"GO:0046434","organophosphate catabolic process","9/473","195/11852",0.376134482758654,0.376134482758654,0.927453163534563,"NCOR1/PDE5A/PGM2L1/SYNJ2/LDLR/SAMHD1/SMPDL3A/NUDT12/PNPLA8",9
GO:0048863,"GO:0048863","stem cell differentiation","9/473","195/11852",0.376134482758654,0.376134482758654,0.927453163534563,"SMAD4/EIF2AK2/JARID2/NRP1/TRIM6/PSMD5/MSI2/N4BP2L2/SEMA3A",9
GO:0006835,"GO:0006835","dicarboxylic acid transport","3/473","55/11852",0.377082503107902,0.377082503107902,0.927453163534563,"SLC38A2/STXBP1/ARL6IP5",3
GO:0010965,"GO:0010965","regulation of mitotic sister chromatid separation","3/473","55/11852",0.377082503107902,0.377082503107902,0.927453163534563,"TTK/BUB1/NDC80",3
GO:0033692,"GO:0033692","cellular polysaccharide biosynthetic process","3/473","55/11852",0.377082503107902,0.377082503107902,0.927453163534563,"SORBS1/PGM2L1/EPM2AIP1",3
GO:0044784,"GO:0044784","metaphase/anaphase transition of cell cycle","3/473","55/11852",0.377082503107902,0.377082503107902,0.927453163534563,"TTK/BUB1/NDC80",3
GO:0046605,"GO:0046605","regulation of centrosome cycle","3/473","55/11852",0.377082503107902,0.377082503107902,0.927453163534563,"PDCD6IP/NEK2/CHMP1B",3
GO:0055006,"GO:0055006","cardiac cell development","3/473","55/11852",0.377082503107902,0.377082503107902,0.927453163534563,"SMAD4/SGCB/ZMPSTE24",3
GO:1903035,"GO:1903035","negative regulation of response to wounding","3/473","55/11852",0.377082503107902,0.377082503107902,0.927453163534563,"PHLDB2/PLAT/CDKN1B",3
GO:0072001,"GO:0072001","renal system development","10/473","219/11852",0.377284186661961,0.377284186661961,0.927453163534563,"ILK/PBX1/KANK2/SMAD4/CEP55/NRP1/STAT1/LGR4/SOX4/ZMPSTE24",10
GO:0072659,"GO:0072659","protein localization to plasma membrane","10/473","219/11852",0.377284186661961,0.377284186661961,0.927453163534563,"SORBS1/GOLPH3L/STXBP1/TNIK/PPP2R5A/STX7/TMEM59/BBS2/RAB10/ARF6",10
GO:0009895,"GO:0009895","negative regulation of catabolic process","11/473","243/11852",0.377969106090629,0.377969106090629,0.927453163534563,"GOLGA2/USP19/PIK3CG/FYN/SORL1/PTK2/RRAGA/ERLEC1/PAIP1/GABARAPL2/PBK",11
GO:0050803,"GO:0050803","regulation of synapse structure or activity","7/473","148/11852",0.378213898040254,0.378213898040254,0.927453163534563,"CDKL5/FLRT3/ZMYND8/ABHD17C/FYN/PTK2/ARF6",7
GO:1905330,"GO:1905330","regulation of morphogenesis of an epithelium","7/473","148/11852",0.378213898040254,0.378213898040254,0.927453163534563,"PHLDB2/PRICKLE2/STAT1/LGR4/DAAM1/PSMD5/VANGL1",7
GO:0006638,"GO:0006638","neutral lipid metabolic process","4/473","78/11852",0.378586916894333,0.378586916894333,0.927453163534563,"PIK3CG/SORL1/LDLR/ABHD2",4
GO:0044264,"GO:0044264","cellular polysaccharide metabolic process","4/473","78/11852",0.378586916894333,0.378586916894333,0.927453163534563,"SORBS1/PGM2L1/EPM2AIP1/CALM1",4
GO:2001237,"GO:2001237","negative regulation of extrinsic apoptotic signaling pathway","4/473","78/11852",0.378586916894333,0.378586916894333,0.927453163534563,"FYN/CASP8/RFFL/NRP1",4
GO:0030855,"GO:0030855","epithelial cell differentiation","19/473","436/11852",0.379502130645452,0.379502130645452,0.927453163534563,"SMAD4/TJP2/EVPL/KDM5B/TSG101/DSC2/VEZF1/NCOA3/NRP1/CBR1/AQP3/PTER/TMEM38B/STAT1/RAP1B/SOX4/RAB10/ARNTL/CDKN1B",19
GO:0007223,"GO:0007223","Wnt signaling pathway, calcium modulating pathway","2/473","33/11852",0.381585512837372,0.381585512837372,0.927453163534563,"AGO4/CALM1",2
GO:0015837,"GO:0015837","amine transport","2/473","33/11852",0.381585512837372,0.381585512837372,0.927453163534563,"STXBP1/ARL6IP5",2
GO:0017004,"GO:0017004","cytochrome complex assembly","2/473","33/11852",0.381585512837372,0.381585512837372,0.927453163534563,"COA6/COX20",2
GO:0021762,"GO:0021762","substantia nigra development","2/473","33/11852",0.381585512837372,0.381585512837372,0.927453163534563,"CALM2/CALM1",2
GO:0030835,"GO:0030835","negative regulation of actin filament depolymerization","2/473","33/11852",0.381585512837372,0.381585512837372,0.927453163534563,"CARMIL1/MTPN",2
GO:0031062,"GO:0031062","positive regulation of histone methylation","2/473","33/11852",0.381585512837372,0.381585512837372,0.927453163534563,"SMAD4/JARID2",2
GO:0031294,"GO:0031294","lymphocyte costimulation","2/473","33/11852",0.381585512837372,0.381585512837372,0.927453163534563,"DPP4/FYN",2
GO:0033146,"GO:0033146","regulation of intracellular estrogen receptor signaling pathway","2/473","33/11852",0.381585512837372,0.381585512837372,0.927453163534563,"KANK2/UBA5",2
GO:0034113,"GO:0034113","heterotypic cell-cell adhesion","2/473","33/11852",0.381585512837372,0.381585512837372,0.927453163534563,"DSC2/CD58",2
GO:0042267,"GO:0042267","natural killer cell mediated cytotoxicity","2/473","33/11852",0.381585512837372,0.381585512837372,0.927453163534563,"SERPINB9/IL18",2
GO:0045103,"GO:0045103","intermediate filament-based process","2/473","33/11852",0.381585512837372,0.381585512837372,0.927453163534563,"EVPL/ATXN3",2
GO:0045661,"GO:0045661","regulation of myoblast differentiation","2/473","33/11852",0.381585512837372,0.381585512837372,0.927453163534563,"ILK/IL18",2
GO:0046638,"GO:0046638","positive regulation of alpha-beta T cell differentiation","2/473","33/11852",0.381585512837372,0.381585512837372,0.927453163534563,"TGFBR2/IL18",2
GO:0048599,"GO:0048599","oocyte development","2/473","33/11852",0.381585512837372,0.381585512837372,0.927453163534563,"CDC25B/PDE5A",2
GO:0051952,"GO:0051952","regulation of amine transport","2/473","33/11852",0.381585512837372,0.381585512837372,0.927453163534563,"STXBP1/ARL6IP5",2
GO:0060043,"GO:0060043","regulation of cardiac muscle cell proliferation","2/473","33/11852",0.381585512837372,0.381585512837372,0.927453163534563,"JARID2/TGFBR2",2
GO:0060351,"GO:0060351","cartilage development involved in endochondral bone morphogenesis","2/473","33/11852",0.381585512837372,0.381585512837372,0.927453163534563,"TGFBR2/ZMPSTE24",2
GO:0071985,"GO:0071985","multivesicular body sorting pathway","2/473","33/11852",0.381585512837372,0.381585512837372,0.927453163534563,"TMEM50B/CHMP1B",2
GO:0090317,"GO:0090317","negative regulation of intracellular protein transport","2/473","33/11852",0.381585512837372,0.381585512837372,0.927453163534563,"ERLEC1/MDFIC",2
GO:0098868,"GO:0098868","bone growth","2/473","33/11852",0.381585512837372,0.381585512837372,0.927453163534563,"TGFBR2/ZMPSTE24",2
GO:0050663,"GO:0050663","cytokine secretion","6/473","125/11852",0.381924896158061,0.381924896158061,0.927453163534563,"FRMD8/F2R/MAVS/LGR4/TRIM6/CD58",6
GO:0090263,"GO:0090263","positive regulation of canonical Wnt signaling pathway","6/473","125/11852",0.381924896158061,0.381924896158061,0.927453163534563,"ILK/ASPM/LGR4/SOX4/PSMD5/ARNTL",6
GO:1901699,"GO:1901699","cellular response to nitrogen compound","20/473","461/11852",0.382387679241712,0.382387679241712,0.927453163534563,"ADCY7/PDK4/PIK3CG/SORBS1/FYN/GNAQ/MAVS/KLF11/SORL1/KLF3/PTK2/RRAGA/MDM2/TMEM38B/STAT1/PRKAR1A/RAP1B/ATP6V1A/RALB/RAB10",20
GO:0016055,"GO:0016055","Wnt signaling pathway","19/473","437/11852",0.383343792467319,0.383343792467319,0.927453163534563,"ILK/AGO4/IFT80/ASPM/MBD2/GNAQ/TNIK/PRICKLE2/CALCOCO1/LGR4/SOX4/DAAM1/HBP1/DIXDC1/PSMD5/MDFIC/ARNTL/VANGL1/CALM1",19
GO:1902275,"GO:1902275","regulation of chromatin organization","7/473","149/11852",0.384793492985718,0.384793492985718,0.927453163534563,"SMAD4/SDR16C5/JARID2/ATF7IP/ASF1A/EID1/ZMPSTE24",7
GO:0002371,"GO:0002371","dendritic cell cytokine production","1/473","12/11852",0.386734039929984,0.386734039929984,0.927453163534563,"MAVS",1
GO:0002407,"GO:0002407","dendritic cell chemotaxis","1/473","12/11852",0.386734039929984,0.386734039929984,0.927453163534563,"PIK3CG",1
GO:0003081,"GO:0003081","regulation of systemic arterial blood pressure by renin-angiotensin","1/473","12/11852",0.386734039929984,0.386734039929984,0.927453163534563,"F2R",1
GO:0006264,"GO:0006264","mitochondrial DNA replication","1/473","12/11852",0.386734039929984,0.386734039929984,0.927453163534563,"PRIMPOL",1
GO:0006607,"GO:0006607","NLS-bearing protein import into nucleus","1/473","12/11852",0.386734039929984,0.386734039929984,0.927453163534563,"KPNA2",1
GO:0006670,"GO:0006670","sphingosine metabolic process","1/473","12/11852",0.386734039929984,0.386734039929984,0.927453163534563,"SGPP2",1
GO:0009209,"GO:0009209","pyrimidine ribonucleoside triphosphate biosynthetic process","1/473","12/11852",0.386734039929984,0.386734039929984,0.927453163534563,"NME7",1
GO:0009214,"GO:0009214","cyclic nucleotide catabolic process","1/473","12/11852",0.386734039929984,0.386734039929984,0.927453163534563,"PDE5A",1
GO:0009312,"GO:0009312","oligosaccharide biosynthetic process","1/473","12/11852",0.386734039929984,0.386734039929984,0.927453163534563,"FUT8",1
GO:0009650,"GO:0009650","UV protection","1/473","12/11852",0.386734039929984,0.386734039929984,0.927453163534563,"XPA",1
GO:0010917,"GO:0010917","negative regulation of mitochondrial membrane potential","1/473","12/11852",0.386734039929984,0.386734039929984,0.927453163534563,"ARL6IP5",1
GO:0014829,"GO:0014829","vascular smooth muscle contraction","1/473","12/11852",0.386734039929984,0.386734039929984,0.927453163534563,"BBS2",1
GO:0016024,"GO:0016024","CDP-diacylglycerol biosynthetic process","1/473","12/11852",0.386734039929984,0.386734039929984,0.927453163534563,"AGPAT4",1
GO:0016558,"GO:0016558","protein import into peroxisome matrix","1/473","12/11852",0.386734039929984,0.386734039929984,0.927453163534563,"PEX1",1
GO:0019377,"GO:0019377","glycolipid catabolic process","1/473","12/11852",0.386734039929984,0.386734039929984,0.927453163534563,"GM2A",1
GO:0019835,"GO:0019835","cytolysis","1/473","12/11852",0.386734039929984,0.386734039929984,0.927453163534563,"RRAGA",1
GO:0021533,"GO:0021533","cell differentiation in hindbrain","1/473","12/11852",0.386734039929984,0.386734039929984,0.927453163534563,"MTPN",1
GO:0022400,"GO:0022400","regulation of rhodopsin mediated signaling pathway","1/473","12/11852",0.386734039929984,0.386734039929984,0.927453163534563,"CALM1",1
GO:0030214,"GO:0030214","hyaluronan catabolic process","1/473","12/11852",0.386734039929984,0.386734039929984,0.927453163534563,"HMMR",1
GO:0031054,"GO:0031054","pre-miRNA processing","1/473","12/11852",0.386734039929984,0.386734039929984,0.927453163534563,"AGO4",1
GO:0031937,"GO:0031937","positive regulation of chromatin silencing","1/473","12/11852",0.386734039929984,0.386734039929984,0.927453163534563,"ATF7IP",1
GO:0032891,"GO:0032891","negative regulation of organic acid transport","1/473","12/11852",0.386734039929984,0.386734039929984,0.927453163534563,"ARL6IP5",1
GO:0034367,"GO:0034367","protein-containing complex remodeling","1/473","12/11852",0.386734039929984,0.386734039929984,0.927453163534563,"ABCA5",1
GO:0035067,"GO:0035067","negative regulation of histone acetylation","1/473","12/11852",0.386734039929984,0.386734039929984,0.927453163534563,"SDR16C5",1
GO:0035563,"GO:0035563","positive regulation of chromatin binding","1/473","12/11852",0.386734039929984,0.386734039929984,0.927453163534563,"MBD2",1
GO:0035640,"GO:0035640","exploration behavior","1/473","12/11852",0.386734039929984,0.386734039929984,0.927453163534563,"DPP4",1
GO:0035729,"GO:0035729","cellular response to hepatocyte growth factor stimulus","1/473","12/11852",0.386734039929984,0.386734039929984,0.927453163534563,"NRP1",1
GO:0036109,"GO:0036109","alpha-linolenic acid metabolic process","1/473","12/11852",0.386734039929984,0.386734039929984,0.927453163534563,"ACOX1",1
GO:0043248,"GO:0043248","proteasome assembly","1/473","12/11852",0.386734039929984,0.386734039929984,0.927453163534563,"PSMD5",1
GO:0043651,"GO:0043651","linoleic acid metabolic process","1/473","12/11852",0.386734039929984,0.386734039929984,0.927453163534563,"PNPLA8",1
GO:0045603,"GO:0045603","positive regulation of endothelial cell differentiation","1/473","12/11852",0.386734039929984,0.386734039929984,0.927453163534563,"VEZF1",1
GO:0046349,"GO:0046349","amino sugar biosynthetic process","1/473","12/11852",0.386734039929984,0.386734039929984,0.927453163534563,"GNE",1
GO:0048012,"GO:0048012","hepatocyte growth factor receptor signaling pathway","1/473","12/11852",0.386734039929984,0.386734039929984,0.927453163534563,"NRP1",1
GO:0050482,"GO:0050482","arachidonic acid secretion","1/473","12/11852",0.386734039929984,0.386734039929984,0.927453163534563,"PNPLA8",1
GO:0051580,"GO:0051580","regulation of neurotransmitter uptake","1/473","12/11852",0.386734039929984,0.386734039929984,0.927453163534563,"ARL6IP5",1
GO:0051953,"GO:0051953","negative regulation of amine transport","1/473","12/11852",0.386734039929984,0.386734039929984,0.927453163534563,"ARL6IP5",1
GO:0060413,"GO:0060413","atrial septum morphogenesis","1/473","12/11852",0.386734039929984,0.386734039929984,0.927453163534563,"SOX4",1
GO:0070863,"GO:0070863","positive regulation of protein exit from endoplasmic reticulum","1/473","12/11852",0.386734039929984,0.386734039929984,0.927453163534563,"SORL1",1
GO:0072087,"GO:0072087","renal vesicle development","1/473","12/11852",0.386734039929984,0.386734039929984,0.927453163534563,"STAT1",1
GO:0072393,"GO:0072393","microtubule anchoring at microtubule organizing center","1/473","12/11852",0.386734039929984,0.386734039929984,0.927453163534563,"HOOK3",1
GO:0072520,"GO:0072520","seminiferous tubule development","1/473","12/11852",0.386734039929984,0.386734039929984,0.927453163534563,"SMAD4",1
GO:0090136,"GO:0090136","epithelial cell-cell adhesion","1/473","12/11852",0.386734039929984,0.386734039929984,0.927453163534563,"CYP1B1",1
GO:0097205,"GO:0097205","renal filtration","1/473","12/11852",0.386734039929984,0.386734039929984,0.927453163534563,"F2R",1
GO:0098840,"GO:0098840","protein transport along microtubule","1/473","12/11852",0.386734039929984,0.386734039929984,0.927453163534563,"PURA",1
GO:0099118,"GO:0099118","microtubule-based protein transport","1/473","12/11852",0.386734039929984,0.386734039929984,0.927453163534563,"PURA",1
GO:1900037,"GO:1900037","regulation of cellular response to hypoxia","1/473","12/11852",0.386734039929984,0.386734039929984,0.927453163534563,"USP19",1
GO:1900746,"GO:1900746","regulation of vascular endothelial growth factor signaling pathway","1/473","12/11852",0.386734039929984,0.386734039929984,0.927453163534563,"CADM4",1
GO:1902547,"GO:1902547","regulation of cellular response to vascular endothelial growth factor stimulus","1/473","12/11852",0.386734039929984,0.386734039929984,0.927453163534563,"CADM4",1
GO:1903025,"GO:1903025","regulation of RNA polymerase II regulatory region sequence-specific DNA binding","1/473","12/11852",0.386734039929984,0.386734039929984,0.927453163534563,"ZMPSTE24",1
GO:1903960,"GO:1903960","negative regulation of anion transmembrane transport","1/473","12/11852",0.386734039929984,0.386734039929984,0.927453163534563,"ARL6IP5",1
GO:1903963,"GO:1903963","arachidonate transport","1/473","12/11852",0.386734039929984,0.386734039929984,0.927453163534563,"PNPLA8",1
GO:1904152,"GO:1904152","regulation of retrograde protein transport, ER to cytosol","1/473","12/11852",0.386734039929984,0.386734039929984,0.927453163534563,"ERLEC1",1
GO:1904263,"GO:1904263","positive regulation of TORC1 signaling","1/473","12/11852",0.386734039929984,0.386734039929984,0.927453163534563,"RRAGA",1
GO:1904293,"GO:1904293","negative regulation of ERAD pathway","1/473","12/11852",0.386734039929984,0.386734039929984,0.927453163534563,"ERLEC1",1
GO:1904923,"GO:1904923","regulation of autophagy of mitochondrion in response to mitochondrial depolarization","1/473","12/11852",0.386734039929984,0.386734039929984,0.927453163534563,"HDAC6",1
GO:2001025,"GO:2001025","positive regulation of response to drug","1/473","12/11852",0.386734039929984,0.386734039929984,0.927453163534563,"HDAC6",1
GO:0198738,"GO:0198738","cell-cell signaling by wnt","19/473","438/11852",0.387191134591432,0.387191134591432,0.927453163534563,"ILK/AGO4/IFT80/ASPM/MBD2/GNAQ/TNIK/PRICKLE2/CALCOCO1/LGR4/SOX4/DAAM1/HBP1/DIXDC1/PSMD5/MDFIC/ARNTL/VANGL1/CALM1",19
GO:0015849,"GO:0015849","organic acid transport","9/473","197/11852",0.387572898282355,0.387572898282355,0.927453163534563,"NCOR1/SLC17A5/SLC38A2/STXBP1/SLC16A14/SLC38A6/ARL6IP5/PNPLA8/SLCO1B3",9
GO:0046942,"GO:0046942","carboxylic acid transport","9/473","197/11852",0.387572898282355,0.387572898282355,0.927453163534563,"NCOR1/SLC17A5/SLC38A2/STXBP1/SLC16A14/SLC38A6/ARL6IP5/PNPLA8/SLCO1B3",9
GO:0043473,"GO:0043473","pigmentation","4/473","79/11852",0.387716296650269,0.387716296650269,0.927453163534563,"EDAR/BBS2/HPS3/VANGL1",4
GO:0051588,"GO:0051588","regulation of neurotransmitter transport","4/473","79/11852",0.387716296650269,0.387716296650269,0.927453163534563,"KCNMB4/STXBP1/RAP1B/ARL6IP5",4
GO:0045833,"GO:0045833","negative regulation of lipid metabolic process","3/473","56/11852",0.388011495884766,0.388011495884766,0.927453163534563,"PIK3CG/SORL1/PPP2R5A",3
GO:0048477,"GO:0048477","oogenesis","3/473","56/11852",0.388011495884766,0.388011495884766,0.927453163534563,"CDC25B/ASPM/PDE5A",3
GO:1903902,"GO:1903902","positive regulation of viral life cycle","3/473","56/11852",0.388011495884766,0.388011495884766,0.927453163534563,"TSG101/KPNA2/VAPA",3
GO:0009150,"GO:0009150","purine ribonucleotide metabolic process","18/473","414/11852",0.388215304473633,0.388215304473633,0.927453163534563,"ACOT13/NCOR1/ACSS2/ADCY7/TJP2/PDK4/PDE5A/PGM2L1/MOCS2/DCAKD/COX7C/COA6/NDUFB6/PDP1/ATP6V1A/NDUFC2/NME7/PPCS",18
GO:0071214,"GO:0071214","cellular response to abiotic stimulus","11/473","245/11852",0.388225028872614,0.388225028872614,0.927453163534563,"EIF2AK4/SLC38A2/CASP8/CUL4B/XPA/MDM2/MTPN/CALM1/GTF2H5/ZMPSTE24/PBK",11
GO:0104004,"GO:0104004","cellular response to environmental stimulus","11/473","245/11852",0.388225028872614,0.388225028872614,0.927453163534563,"EIF2AK4/SLC38A2/CASP8/CUL4B/XPA/MDM2/MTPN/CALM1/GTF2H5/ZMPSTE24/PBK",11
GO:0001738,"GO:0001738","morphogenesis of a polarized epithelium","6/473","126/11852",0.389109590198908,0.389109590198908,0.927453163534563,"DLG3/PRICKLE2/DAAM1/PSMD5/RAB10/VANGL1",6
GO:0031570,"GO:0031570","DNA integrity checkpoint","7/473","150/11852",0.391376170281376,0.391376170281376,0.927453163534563,"EIF2AK4/CDC25C/ABRAXAS1/CDC14B/MDM2/SOX4/CDKN1B",7
GO:0048489,"GO:0048489","synaptic vesicle transport","5/473","103/11852",0.393240644485579,0.393240644485579,0.927453163534563,"STXBP1/STX2/RAP1B/SNAP23/TMEM230",5
GO:0097480,"GO:0097480","establishment of synaptic vesicle localization","5/473","103/11852",0.393240644485579,0.393240644485579,0.927453163534563,"STXBP1/STX2/RAP1B/SNAP23/TMEM230",5
GO:0106106,"GO:0106106","cold-induced thermogenesis","5/473","103/11852",0.393240644485579,0.393240644485579,0.927453163534563,"ACOT13/LGR4/OMA1/ARNTL/IL18",5
GO:0120161,"GO:0120161","regulation of cold-induced thermogenesis","5/473","103/11852",0.393240644485579,0.393240644485579,0.927453163534563,"ACOT13/LGR4/OMA1/ARNTL/IL18",5
GO:0051091,"GO:0051091","positive regulation of DNA-binding transcription factor activity","9/473","198/11852",0.393299870097779,0.393299870097779,0.927453163534563,"ERC1/TRIM5/IRAK4/MAP3K13/MAVS/EIF2AK2/MTPN/IL18/RTKN2",9
GO:0000096,"GO:0000096","sulfur amino acid metabolic process","2/473","34/11852",0.395886320110119,0.395886320110119,0.927453163534563,"MTHFD2L/ADI1",2
GO:0000413,"GO:0000413","protein peptidyl-prolyl isomerization","2/473","34/11852",0.395886320110119,0.395886320110119,0.927453163534563,"FKBP1A/PPIC",2
GO:0002228,"GO:0002228","natural killer cell mediated immunity","2/473","34/11852",0.395886320110119,0.395886320110119,0.927453163534563,"SERPINB9/IL18",2
GO:0007193,"GO:0007193","adenylate cyclase-inhibiting G protein-coupled receptor signaling pathway","2/473","34/11852",0.395886320110119,0.395886320110119,0.927453163534563,"ADCY7/GNAI1",2
GO:0010463,"GO:0010463","mesenchymal cell proliferation","2/473","34/11852",0.395886320110119,0.395886320110119,0.927453163534563,"TGFBR2/STAT1",2
GO:0030199,"GO:0030199","collagen fibril organization","2/473","34/11852",0.395886320110119,0.395886320110119,0.927453163534563,"CYP1B1/P4HA1",2
GO:0031018,"GO:0031018","endocrine pancreas development","2/473","34/11852",0.395886320110119,0.395886320110119,0.927453163534563,"SOX4/ARNTL",2
GO:0035082,"GO:0035082","axoneme assembly","2/473","34/11852",0.395886320110119,0.395886320110119,0.927453163534563,"GAS8/BBS2",2
GO:0043124,"GO:0043124","negative regulation of I-kappaB kinase/NF-kappaB signaling","2/473","34/11852",0.395886320110119,0.395886320110119,0.927453163534563,"CASP8/STAT1",2
GO:0050775,"GO:0050775","positive regulation of dendrite morphogenesis","2/473","34/11852",0.395886320110119,0.395886320110119,0.927453163534563,"ILK/CDKL5",2
GO:0050919,"GO:0050919","negative chemotaxis","2/473","34/11852",0.395886320110119,0.395886320110119,0.927453163534563,"FLRT3/SEMA3A",2
GO:0060443,"GO:0060443","mammary gland morphogenesis","2/473","34/11852",0.395886320110119,0.395886320110119,0.927453163534563,"KDM5B/TGFBR2",2
GO:0061028,"GO:0061028","establishment of endothelial barrier","2/473","34/11852",0.395886320110119,0.395886320110119,0.927453163534563,"TJP2/RAP1B",2
GO:0071526,"GO:0071526","semaphorin-plexin signaling pathway","2/473","34/11852",0.395886320110119,0.395886320110119,0.927453163534563,"NRP1/SEMA3A",2
GO:0090303,"GO:0090303","positive regulation of wound healing","2/473","34/11852",0.395886320110119,0.395886320110119,0.927453163534563,"F2R/TGFBR2",2
GO:1902667,"GO:1902667","regulation of axon guidance","2/473","34/11852",0.395886320110119,0.395886320110119,0.927453163534563,"NRP1/SEMA3A",2
GO:1903018,"GO:1903018","regulation of glycoprotein metabolic process","2/473","34/11852",0.395886320110119,0.395886320110119,0.927453163534563,"GOLGA2/TMEM59",2
GO:0046649,"GO:0046649","lymphocyte activation","18/473","416/11852",0.396145742611597,0.396145742611597,0.927453163534563,"FKBP1A/GON4L/DPP4/KIF13B/EIF2AK4/SOCS6/VAV3/PIK3CG/PDE5A/FYN/CASP8/PURA/TGFBR2/TPD52/PRKAR1A/SOX4/IRF2BP2/IL18",18
GO:0009411,"GO:0009411","response to UV","6/473","127/11852",0.39629321072287,0.39629321072287,0.927453163534563,"EIF2AK4/CUL4B/XPA/MDM2/PRIMPOL/PBK",6
GO:0007368,"GO:0007368","determination of left/right symmetry","4/473","80/11852",0.396828004295468,0.396828004295468,0.927453163534563,"C2CD3/DYNC2LI1/GAS8/TGFBR2",4
GO:0034446,"GO:0034446","substrate adhesion-dependent cell spreading","4/473","80/11852",0.396828004295468,0.396828004295468,0.927453163534563,"ILK/CARMIL1/NRP1/PTK2",4
GO:0046916,"GO:0046916","cellular transition metal ion homeostasis","4/473","80/11852",0.396828004295468,0.396828004295468,0.927453163534563,"SMAD4/FBXL5/ATP6V1A/NDFIP1",4
GO:0001655,"GO:0001655","urogenital system development","11/473","247/11852",0.398502627116908,0.398502627116908,0.927453163534563,"ILK/PBX1/KANK2/SMAD4/CEP55/NRP1/STAT1/LGR4/SOX4/CDKN1B/ZMPSTE24",11
GO:0014706,"GO:0014706","striated muscle tissue development","11/473","247/11852",0.398502627116908,0.398502627116908,0.927453163534563,"FKBP1A/SMAD4/USP19/SGCB/JARID2/TGFBR2/MTPN/PRKAR1A/ARNTL/SAP30/ZMPSTE24",11
GO:0002718,"GO:0002718","regulation of cytokine production involved in immune response","3/473","57/11852",0.398893683259459,0.398893683259459,0.927453163534563,"MAVS/TRIM6/IL18",3
GO:0006661,"GO:0006661","phosphatidylinositol biosynthetic process","5/473","104/11852",0.401216369815209,0.401216369815209,0.927453163534563,"PIGB/PIK3CG/SYNJ2/PIGM/PLEKHA2",5
GO:0007269,"GO:0007269","neurotransmitter secretion","5/473","104/11852",0.401216369815209,0.401216369815209,0.927453163534563,"KCNMB4/STXBP1/STX2/RAP1B/SNAP23",5
GO:0010822,"GO:0010822","positive regulation of mitochondrion organization","5/473","104/11852",0.401216369815209,0.401216369815209,0.927453163534563,"HDAC6/BIK/CASP8/MLLT11/RHOU",5
GO:0099643,"GO:0099643","signal release from synapse","5/473","104/11852",0.401216369815209,0.401216369815209,0.927453163534563,"KCNMB4/STXBP1/STX2/RAP1B/SNAP23",5
GO:0043900,"GO:0043900","regulation of multi-organism process","13/473","296/11852",0.401864043183574,0.401864043183574,0.927453163534563,"EIF2AK4/TRIM5/TSG101/PDE5A/STXBP1/MAVS/EIF2AK2/KPNA2/STAT1/TRIM6/VAPA/MDFIC/ZMPSTE24",13
GO:0035265,"GO:0035265","organ growth","6/473","128/11852",0.403473396246352,0.403473396246352,0.927453163534563,"JARID2/TGFBR2/PTK2/TMEM38B/PRKAR1A/ZMPSTE24",6
GO:0022900,"GO:0022900","electron transport chain","7/473","152/11852",0.404543341598487,0.404543341598487,0.927453163534563,"COX7C/COA6/NDUFB6/ME1/NDUFC2/P4HA2/GLRX2",7
GO:0070588,"GO:0070588","calcium ion transmembrane transport","9/473","200/11852",0.404763135050412,0.404763135050412,0.927453163534563,"FKBP1A/THADA/PLCH1/F2R/PIK3CG/FYN/TMEM38B/CALM2/CALM1",9
GO:0051259,"GO:0051259","protein complex oligomerization","17/473","394/11852",0.405556741609821,0.405556741609821,0.927453163534563,"ACOT13/HDAC6/ILK/GOLGA2/SMAD4/BIK/TRAPPC11/NBR1/PDCD6IP/SORL1/SAMHD1/STX2/ME1/TRIM6/MARCKS/CEP57/CRYZ",17
GO:0030838,"GO:0030838","positive regulation of actin filament polymerization","4/473","81/11852",0.405917557010357,0.405917557010357,0.927453163534563,"CARMIL1/RHOBTB1/GMFB/ARF6",4
GO:0031400,"GO:0031400","negative regulation of protein modification process","21/473","492/11852",0.40706085607735,0.40706085607735,0.927453163534563,"FKBP1A/NCOR1/ILK/SMAD4/CADM4/TSG101/SDR16C5/FYN/STK38/GNAQ/JARID2/SORL1/GMFB/PRKAR1A/TMEM59/SOX4/CALM2/CDKN2C/CALM1/CDKN1B/PBK",21
GO:0019058,"GO:0019058","viral life cycle","12/473","273/11852",0.407729547450409,0.407729547450409,0.927453163534563,"DPP4/EIF2AK4/TRIM5/TSG101/MAVS/PDCD6IP/EIF2AK2/KPNA2/LDLR/TRIM6/VAPA/CHMP1B",12
GO:0051897,"GO:0051897","positive regulation of protein kinase B signaling","5/473","105/11852",0.409180689613214,0.409180689613214,0.927453163534563,"ILK/PIK3CG/FYN/PTK2/IL18",5
GO:0001656,"GO:0001656","metanephros development","3/473","58/11852",0.40972219149492,0.40972219149492,0.927453163534563,"SMAD4/STAT1/LGR4",3
GO:0001909,"GO:0001909","leukocyte mediated cytotoxicity","3/473","58/11852",0.40972219149492,0.40972219149492,0.927453163534563,"SERPINB9/STX7/IL18",3
GO:0010257,"GO:0010257","NADH dehydrogenase complex assembly","3/473","58/11852",0.40972219149492,0.40972219149492,0.927453163534563,"NDUFB6/NDUFC2/NUBPL",3
GO:0030301,"GO:0030301","cholesterol transport","3/473","58/11852",0.40972219149492,0.40972219149492,0.927453163534563,"TTC39B/ABCA5/LDLR",3
GO:0032981,"GO:0032981","mitochondrial respiratory chain complex I assembly","3/473","58/11852",0.40972219149492,0.40972219149492,0.927453163534563,"NDUFB6/NDUFC2/NUBPL",3
GO:0051306,"GO:0051306","mitotic sister chromatid separation","3/473","58/11852",0.40972219149492,0.40972219149492,0.927453163534563,"TTK/BUB1/NDC80",3
GO:0007257,"GO:0007257","activation of JUN kinase activity","2/473","35/11852",0.410033262996962,0.410033262996962,0.927453163534563,"MAP3K13/MDFIC",2
GO:0009225,"GO:0009225","nucleotide-sugar metabolic process","2/473","35/11852",0.410033262996962,0.410033262996962,0.927453163534563,"FUT8/GNE",2
GO:0009994,"GO:0009994","oocyte differentiation","2/473","35/11852",0.410033262996962,0.410033262996962,0.927453163534563,"CDC25B/PDE5A",2
GO:0031057,"GO:0031057","negative regulation of histone modification","2/473","35/11852",0.410033262996962,0.410033262996962,0.927453163534563,"SDR16C5/JARID2",2
GO:0032881,"GO:0032881","regulation of polysaccharide metabolic process","2/473","35/11852",0.410033262996962,0.410033262996962,0.927453163534563,"SORBS1/EPM2AIP1",2
GO:0061005,"GO:0061005","cell differentiation involved in kidney development","2/473","35/11852",0.410033262996962,0.410033262996962,0.927453163534563,"STAT1/LGR4",2
GO:0070268,"GO:0070268","cornification","2/473","35/11852",0.410033262996962,0.410033262996962,0.927453163534563,"EVPL/DSC2",2
GO:1905898,"GO:1905898","positive regulation of response to endoplasmic reticulum stress","2/473","35/11852",0.410033262996962,0.410033262996962,0.927453163534563,"RNFT1/ATXN3",2
GO:2000677,"GO:2000677","regulation of transcription regulatory region DNA binding","2/473","35/11852",0.410033262996962,0.410033262996962,0.927453163534563,"TRIM6/ZMPSTE24",2
GO:0019722,"GO:0019722","calcium-mediated signaling","6/473","129/11852",0.4106478258786,0.4106478258786,0.927453163534563,"FKBP1A/RCAN3/TMEM38B/CALM2/CALM1/ZMPSTE24",6
GO:0010632,"GO:0010632","regulation of epithelial cell migration","8/473","177/11852",0.411002431257568,0.411002431257568,0.927453163534563,"HDAC6/MAP3K3/NRP1/TGFBR2/PTK2/CAPN7/ARF6/SEMA3A",8
GO:0051480,"GO:0051480","regulation of cytosolic calcium ion concentration","8/473","177/11852",0.411002431257568,0.411002431257568,0.927453163534563,"FKBP1A/PLCH1/F2R/PIK3CG/FYN/TMEM38B/CALM2/CALM1",8
GO:0010810,"GO:0010810","regulation of cell-substrate adhesion","7/473","153/11852",0.411124181133173,0.411124181133173,0.927453163534563,"ILK/PHLDB2/CARMIL1/NRP1/PTK2/PLEKHA2/ATXN3",7
GO:1902806,"GO:1902806","regulation of cell cycle G1/S phase transition","7/473","153/11852",0.411124181133173,0.411124181133173,0.927453163534563,"KANK2/CDC25C/CUL4B/MDM2/SOX4/CDKN2C/CDKN1B",7
GO:0006700,"GO:0006700","C21-steroid hormone biosynthetic process","1/473","13/11852",0.411233600665889,0.411233600665889,0.927453163534563,"STARD3NL",1
GO:0007039,"GO:0007039","protein catabolic process in the vacuole","1/473","13/11852",0.411233600665889,0.411233600665889,0.927453163534563,"LDLR",1
GO:0007100,"GO:0007100","mitotic centrosome separation","1/473","13/11852",0.411233600665889,0.411233600665889,0.927453163534563,"NEK2",1
GO:0007274,"GO:0007274","neuromuscular synaptic transmission","1/473","13/11852",0.411233600665889,0.411233600665889,0.927453163534563,"STXBP1",1
GO:0009208,"GO:0009208","pyrimidine ribonucleoside triphosphate metabolic process","1/473","13/11852",0.411233600665889,0.411233600665889,0.927453163534563,"NME7",1
GO:0010866,"GO:0010866","regulation of triglyceride biosynthetic process","1/473","13/11852",0.411233600665889,0.411233600665889,0.927453163534563,"LDLR",1
GO:0010878,"GO:0010878","cholesterol storage","1/473","13/11852",0.411233600665889,0.411233600665889,0.927453163534563,"TTC39B",1
GO:0015813,"GO:0015813","L-glutamate transmembrane transport","1/473","13/11852",0.411233600665889,0.411233600665889,0.927453163534563,"ARL6IP5",1
GO:0016056,"GO:0016056","rhodopsin mediated signaling pathway","1/473","13/11852",0.411233600665889,0.411233600665889,0.927453163534563,"CALM1",1
GO:0030325,"GO:0030325","adrenal gland development","1/473","13/11852",0.411233600665889,0.411233600665889,0.927453163534563,"PBX1",1
GO:0032892,"GO:0032892","positive regulation of organic acid transport","1/473","13/11852",0.411233600665889,0.411233600665889,0.927453163534563,"STXBP1",1
GO:0033005,"GO:0033005","positive regulation of mast cell activation","1/473","13/11852",0.411233600665889,0.411233600665889,0.927453163534563,"STXBP1",1
GO:0033631,"GO:0033631","cell-cell adhesion mediated by integrin","1/473","13/11852",0.411233600665889,0.411233600665889,0.927453163534563,"DPP4",1
GO:0033688,"GO:0033688","regulation of osteoblast proliferation","1/473","13/11852",0.411233600665889,0.411233600665889,0.927453163534563,"EIF2AK2",1
GO:0036092,"GO:0036092","phosphatidylinositol-3-phosphate biosynthetic process","1/473","13/11852",0.411233600665889,0.411233600665889,0.927453163534563,"PIK3CG",1
GO:0036295,"GO:0036295","cellular response to increased oxygen levels","1/473","13/11852",0.411233600665889,0.411233600665889,0.927453163534563,"ATP6V1A",1
GO:0042104,"GO:0042104","positive regulation of activated T cell proliferation","1/473","13/11852",0.411233600665889,0.411233600665889,0.927453163534563,"IL18",1
GO:0042730,"GO:0042730","fibrinolysis","1/473","13/11852",0.411233600665889,0.411233600665889,0.927453163534563,"PLAT",1
GO:0044320,"GO:0044320","cellular response to leptin stimulus","1/473","13/11852",0.411233600665889,0.411233600665889,0.927453163534563,"BBS2",1
GO:0045663,"GO:0045663","positive regulation of myoblast differentiation","1/473","13/11852",0.411233600665889,0.411233600665889,0.927453163534563,"ILK",1
GO:0045837,"GO:0045837","negative regulation of membrane potential","1/473","13/11852",0.411233600665889,0.411233600665889,0.927453163534563,"ARL6IP5",1
GO:0045907,"GO:0045907","positive regulation of vasoconstriction","1/473","13/11852",0.411233600665889,0.411233600665889,0.927453163534563,"F2R",1
GO:0046341,"GO:0046341","CDP-diacylglycerol metabolic process","1/473","13/11852",0.411233600665889,0.411233600665889,0.927453163534563,"AGPAT4",1
GO:0046459,"GO:0046459","short-chain fatty acid metabolic process","1/473","13/11852",0.411233600665889,0.411233600665889,0.927453163534563,"ACSS2",1
GO:0046606,"GO:0046606","negative regulation of centrosome cycle","1/473","13/11852",0.411233600665889,0.411233600665889,0.927453163534563,"NEK2",1
GO:0046838,"GO:0046838","phosphorylated carbohydrate dephosphorylation","1/473","13/11852",0.411233600665889,0.411233600665889,0.927453163534563,"SYNJ2",1
GO:0046855,"GO:0046855","inositol phosphate dephosphorylation","1/473","13/11852",0.411233600665889,0.411233600665889,0.927453163534563,"SYNJ2",1
GO:0048143,"GO:0048143","astrocyte activation","1/473","13/11852",0.411233600665889,0.411233600665889,0.927453163534563,"LDLR",1
GO:0050974,"GO:0050974","detection of mechanical stimulus involved in sensory perception","1/473","13/11852",0.411233600665889,0.411233600665889,0.927453163534563,"FYN",1
GO:0051482,"GO:0051482","positive regulation of cytosolic calcium ion concentration involved in phospholipase C-activating G protein-coupled signaling pathway","1/473","13/11852",0.411233600665889,0.411233600665889,0.927453163534563,"F2R",1
GO:0051645,"GO:0051645","Golgi localization","1/473","13/11852",0.411233600665889,0.411233600665889,0.927453163534563,"HOOK3",1
GO:0060039,"GO:0060039","pericardium development","1/473","13/11852",0.411233600665889,0.411233600665889,0.927453163534563,"FLRT3",1
GO:0061323,"GO:0061323","cell proliferation involved in heart morphogenesis","1/473","13/11852",0.411233600665889,0.411233600665889,0.927453163534563,"SMAD4",1
GO:0071404,"GO:0071404","cellular response to low-density lipoprotein particle stimulus","1/473","13/11852",0.411233600665889,0.411233600665889,0.927453163534563,"LDLR",1
GO:0072111,"GO:0072111","cell proliferation involved in kidney development","1/473","13/11852",0.411233600665889,0.411233600665889,0.927453163534563,"STAT1",1
GO:0072160,"GO:0072160","nephron tubule epithelial cell differentiation","1/473","13/11852",0.411233600665889,0.411233600665889,0.927453163534563,"STAT1",1
GO:0090208,"GO:0090208","positive regulation of triglyceride metabolic process","1/473","13/11852",0.411233600665889,0.411233600665889,0.927453163534563,"LDLR",1
GO:0098911,"GO:0098911","regulation of ventricular cardiac muscle cell action potential","1/473","13/11852",0.411233600665889,0.411233600665889,0.927453163534563,"DSC2",1
GO:0099560,"GO:0099560","synaptic membrane adhesion","1/473","13/11852",0.411233600665889,0.411233600665889,0.927453163534563,"FLRT3",1
GO:1900409,"GO:1900409","positive regulation of cellular response to oxidative stress","1/473","13/11852",0.411233600665889,0.411233600665889,0.927453163534563,"HDAC6",1
GO:1902992,"GO:1902992","negative regulation of amyloid precursor protein catabolic process","1/473","13/11852",0.411233600665889,0.411233600665889,0.927453163534563,"SORL1",1
GO:1903019,"GO:1903019","negative regulation of glycoprotein metabolic process","1/473","13/11852",0.411233600665889,0.411233600665889,0.927453163534563,"TMEM59",1
GO:1903209,"GO:1903209","positive regulation of oxidative stress-induced cell death","1/473","13/11852",0.411233600665889,0.411233600665889,0.927453163534563,"HDAC6",1
GO:1904706,"GO:1904706","negative regulation of vascular smooth muscle cell proliferation","1/473","13/11852",0.411233600665889,0.411233600665889,0.927453163534563,"CDKN1B",1
GO:2000136,"GO:2000136","regulation of cell proliferation involved in heart morphogenesis","1/473","13/11852",0.411233600665889,0.411233600665889,0.927453163534563,"SMAD4",1
GO:2000696,"GO:2000696","regulation of epithelial cell differentiation involved in kidney development","1/473","13/11852",0.411233600665889,0.411233600665889,0.927453163534563,"STAT1",1
GO:2001014,"GO:2001014","regulation of skeletal muscle cell differentiation","1/473","13/11852",0.411233600665889,0.411233600665889,0.927453163534563,"ARNTL",1
GO:0009119,"GO:0009119","ribonucleoside metabolic process","4/473","82/11852",0.41498061736455,0.41498061736455,0.927453163534563,"TJP2/MOCS2/PRTFDC1/NME7",4
GO:0042773,"GO:0042773","ATP synthesis coupled electron transport","4/473","82/11852",0.41498061736455,0.41498061736455,0.927453163534563,"COX7C/COA6/NDUFB6/NDUFC2",4
GO:0000082,"GO:0000082","G1/S transition of mitotic cell cycle","10/473","226/11852",0.415152535148839,0.415152535148839,0.927453163534563,"KANK2/CDC25C/IQGAP3/CUL4B/KLF11/MDM2/SOX4/CDKN2C/RHOU/CDKN1B",10
GO:0031396,"GO:0031396","regulation of protein ubiquitination","8/473","178/11852",0.417114410497441,0.417114410497441,0.927453163534563,"FKBP1A/GOLGA2/FYN/CDC14B/UBE2D1/SOX4/NDFIP1/BMI1",8
GO:0030216,"GO:0030216","keratinocyte differentiation","5/473","106/11852",0.417130563577392,0.417130563577392,0.927453163534563,"EVPL/TSG101/DSC2/NCOA3/AQP3",5
GO:0035637,"GO:0035637","multicellular organismal signaling","5/473","106/11852",0.417130563577392,0.417130563577392,0.927453163534563,"KCNMB4/DSC2/CALM2/CALM1/ZMPSTE24",5
GO:0071466,"GO:0071466","cellular response to xenobiotic stimulus","5/473","106/11852",0.417130563577392,0.417130563577392,0.927453163534563,"CBR3/MARC2/TMEM38B/CYP1B1/CRYZ",5
GO:0001578,"GO:0001578","microtubule bundle formation","3/473","59/11852",0.420490496173122,0.420490496173122,0.927453163534563,"TPPP/GAS8/BBS2",3
GO:0006641,"GO:0006641","triglyceride metabolic process","3/473","59/11852",0.420490496173122,0.420490496173122,0.927453163534563,"PIK3CG/SORL1/LDLR",3
GO:0021954,"GO:0021954","central nervous system neuron development","3/473","59/11852",0.420490496173122,0.420490496173122,0.927453163534563,"NRP1/PTK2/SEMA3A",3
GO:0050905,"GO:0050905","neuromuscular process","3/473","59/11852",0.420490496173122,0.420490496173122,0.927453163534563,"GM2A/UBA5/ZMPSTE24",3
GO:0090398,"GO:0090398","cellular senescence","3/473","59/11852",0.420490496173122,0.420490496173122,0.927453163534563,"MAP3K3/ARNTL/ZMPSTE24",3
GO:1905818,"GO:1905818","regulation of chromosome separation","3/473","59/11852",0.420490496173122,0.420490496173122,0.927453163534563,"TTK/BUB1/NDC80",3
GO:0008544,"GO:0008544","epidermis development","10/473","227/11852",0.420570490544056,0.420570490544056,0.927453163534563,"SMAD4/EVPL/ZDHHC21/TSG101/DSC2/NCOA3/EDAR/AQP3/LGR4/ZMPSTE24",10
GO:0045017,"GO:0045017","glycerolipid biosynthetic process","9/473","203/11852",0.421963034842121,0.421963034842121,0.927453163534563,"PIGB/PIK3CG/SYNJ2/PIGM/LDLR/AGPAT4/ABHD3/LIPH/PLEKHA2",9
GO:1902903,"GO:1902903","regulation of supramolecular fiber organization","12/473","276/11852",0.422484602981201,0.422484602981201,0.927453163534563,"HDAC6/SMAD4/PHLDB2/CARMIL1/CIT/NRP1/LDLR/RHOBTB1/GMFB/MTPN/ARF6/CDKN1B",12
GO:0007044,"GO:0007044","cell-substrate junction assembly","4/473","83/11852",0.424012994137879,0.424012994137879,0.927453163534563,"PHLDB2/SORBS1/NRP1/PTK2",4
GO:0060996,"GO:0060996","dendritic spine development","4/473","83/11852",0.424012994137879,0.424012994137879,0.927453163534563,"HDAC6/CDKL5/ZMYND8/ARF6",4
GO:0030317,"GO:0030317","flagellated sperm motility","2/473","36/11852",0.424015841659293,0.424015841659293,0.927453163534563,"GAS8/BBS2",2
GO:0045599,"GO:0045599","negative regulation of fat cell differentiation","2/473","36/11852",0.424015841659293,0.424015841659293,0.927453163534563,"ZADH2/ARNTL",2
GO:0045824,"GO:0045824","negative regulation of innate immune response","2/473","36/11852",0.424015841659293,0.424015841659293,0.927453163534563,"SERPINB9/SAMHD1",2
GO:0051187,"GO:0051187","cofactor catabolic process","2/473","36/11852",0.424015841659293,0.424015841659293,0.927453163534563,"CBR3/NUDT12",2
GO:0060999,"GO:0060999","positive regulation of dendritic spine development","2/473","36/11852",0.424015841659293,0.424015841659293,0.927453163534563,"CDKL5/ZMYND8",2
GO:0097178,"GO:0097178","ruffle assembly","2/473","36/11852",0.424015841659293,0.424015841659293,0.927453163534563,"SNX10/ARF6",2
GO:0097722,"GO:0097722","sperm motility","2/473","36/11852",0.424015841659293,0.424015841659293,0.927453163534563,"GAS8/BBS2",2
GO:1900087,"GO:1900087","positive regulation of G1/S transition of mitotic cell cycle","2/473","36/11852",0.424015841659293,0.424015841659293,0.927453163534563,"CUL4B/MDM2",2
GO:1902116,"GO:1902116","negative regulation of organelle assembly","2/473","36/11852",0.424015841659293,0.424015841659293,0.927453163534563,"SMAD4/ODF2L",2
GO:0048736,"GO:0048736","appendage development","6/473","131/11852",0.424970344416466,0.424970344416466,0.927453163534563,"PBX1/C2CD3/SMAD4/FAM92A/LMBR1/SOX4",6
GO:0060173,"GO:0060173","limb development","6/473","131/11852",0.424970344416466,0.424970344416466,0.927453163534563,"PBX1/C2CD3/SMAD4/FAM92A/LMBR1/SOX4",6
GO:0046330,"GO:0046330","positive regulation of JNK cascade","5/473","107/11852",0.425063026133029,0.425063026133029,0.927453163534563,"MAP3K13/TNIK/EDAR/MDFIC/SEMA3A",5
GO:0072329,"GO:0072329","monocarboxylic acid catabolic process","5/473","107/11852",0.425063026133029,0.425063026133029,0.927453163534563,"ACOX1/AUH/EHHADH/ABHD2/ABHD3",5
GO:0001667,"GO:0001667","ameboidal-type cell migration","13/473","301/11852",0.425439114301779,0.425439114301779,0.927453163534563,"HDAC6/ILK/KANK2/DPP4/MAP3K3/RFFL/NRP1/TGFBR2/PTK2/CYP1B1/CAPN7/ARF6/SEMA3A",13
GO:0009152,"GO:0009152","purine ribonucleotide biosynthetic process","9/473","204/11852",0.427692870637821,0.427692870637821,0.927453163534563,"NCOR1/ACSS2/ADCY7/PDK4/PGM2L1/DCAKD/PDP1/NME7/PPCS",9
GO:0009581,"GO:0009581","detection of external stimulus","3/473","60/11852",0.431192416161945,0.431192416161945,0.927453163534563,"FYN/GNAQ/CALM1",3
GO:0009582,"GO:0009582","detection of abiotic stimulus","3/473","60/11852",0.431192416161945,0.431192416161945,0.927453163534563,"FYN/GNAQ/CALM1",3
GO:0046849,"GO:0046849","bone remodeling","3/473","60/11852",0.431192416161945,0.431192416161945,0.927453163534563,"PDK4/LGR4/SNX10",3
GO:0051591,"GO:0051591","response to cAMP","3/473","60/11852",0.431192416161945,0.431192416161945,0.927453163534563,"PIK3CG/STAT1/RAP1B",3
GO:0051781,"GO:0051781","positive regulation of cell division","3/473","60/11852",0.431192416161945,0.431192416161945,0.927453163534563,"CDC25B/CDC14B/CIT",3
GO:0051963,"GO:0051963","regulation of synapse assembly","3/473","60/11852",0.431192416161945,0.431192416161945,0.927453163534563,"FLRT3/PTK2/ARF6",3
GO:0051348,"GO:0051348","negative regulation of transferase activity","10/473","229/11852",0.431402348797591,0.431402348797591,0.927453163534563,"ILK/TSG101/STK38/GNAQ/SORL1/GMFB/PPP2R5A/PRKAR1A/CDKN2C/CDKN1B",10
GO:0034762,"GO:0034762","regulation of transmembrane transport","14/473","327/11852",0.432582470165955,0.432582470165955,0.927453163534563,"FKBP1A/THADA/F2R/PIK3CG/SORBS1/FYN/DLG3/RTN2/TMEM38B/CALM2/ARL6IP5/CALM1/CREBL2/ZMPSTE24",14
GO:0002705,"GO:0002705","positive regulation of leukocyte mediated immunity","4/473","84/11852",0.4330106428078,0.4330106428078,0.927453163534563,"STXBP1/MAVS/STX7/IL18",4
GO:0010811,"GO:0010811","positive regulation of cell-substrate adhesion","4/473","84/11852",0.4330106428078,0.4330106428078,0.927453163534563,"ILK/CARMIL1/NRP1/PLEKHA2",4
GO:0019395,"GO:0019395","fatty acid oxidation","4/473","84/11852",0.4330106428078,0.4330106428078,0.927453163534563,"ACOX1/PDK4/AUH/EHHADH",4
GO:1904062,"GO:1904062","regulation of cation transmembrane transport","9/473","205/11852",0.433419012045111,0.433419012045111,0.927453163534563,"FKBP1A/THADA/F2R/PIK3CG/FYN/DLG3/TMEM38B/CALM2/CALM1",9
GO:0001773,"GO:0001773","myeloid dendritic cell activation","1/473","14/11852",0.43475640722768,0.43475640722768,0.927453163534563,"TGFBR2",1
GO:0002374,"GO:0002374","cytokine secretion involved in immune response","1/473","14/11852",0.43475640722768,0.43475640722768,0.927453163534563,"TRIM6",1
GO:0002726,"GO:0002726","positive regulation of T cell cytokine production","1/473","14/11852",0.43475640722768,0.43475640722768,0.927453163534563,"IL18",1
GO:0003071,"GO:0003071","renal system process involved in regulation of systemic arterial blood pressure","1/473","14/11852",0.43475640722768,0.43475640722768,0.927453163534563,"F2R",1
GO:0003215,"GO:0003215","cardiac right ventricle morphogenesis","1/473","14/11852",0.43475640722768,0.43475640722768,0.927453163534563,"SOX4",1
GO:0006047,"GO:0006047","UDP-N-acetylglucosamine metabolic process","1/473","14/11852",0.43475640722768,0.43475640722768,0.927453163534563,"GNE",1
GO:0006268,"GO:0006268","DNA unwinding involved in DNA replication","1/473","14/11852",0.43475640722768,0.43475640722768,0.927453163534563,"PURA",1
GO:0006474,"GO:0006474","N-terminal protein amino acid acetylation","1/473","14/11852",0.43475640722768,0.43475640722768,0.927453163534563,"SOX4",1
GO:0007175,"GO:0007175","negative regulation of epidermal growth factor-activated receptor activity","1/473","14/11852",0.43475640722768,0.43475640722768,0.927453163534563,"TSG101",1
GO:0007252,"GO:0007252","I-kappaB phosphorylation","1/473","14/11852",0.43475640722768,0.43475640722768,0.927453163534563,"ERC1",1
GO:0007263,"GO:0007263","nitric oxide mediated signal transduction","1/473","14/11852",0.43475640722768,0.43475640722768,0.927453163534563,"PDE5A",1
GO:0008090,"GO:0008090","retrograde axonal transport","1/473","14/11852",0.43475640722768,0.43475640722768,0.927453163534563,"ACTR10",1
GO:0009404,"GO:0009404","toxin metabolic process","1/473","14/11852",0.43475640722768,0.43475640722768,0.927453163534563,"CYP1B1",1
GO:0010715,"GO:0010715","regulation of extracellular matrix disassembly","1/473","14/11852",0.43475640722768,0.43475640722768,0.927453163534563,"DPP4",1
GO:0010804,"GO:0010804","negative regulation of tumor necrosis factor-mediated signaling pathway","1/473","14/11852",0.43475640722768,0.43475640722768,0.927453163534563,"RFFL",1
GO:0014912,"GO:0014912","negative regulation of smooth muscle cell migration","1/473","14/11852",0.43475640722768,0.43475640722768,0.927453163534563,"ILK",1
GO:0015721,"GO:0015721","bile acid and bile salt transport","1/473","14/11852",0.43475640722768,0.43475640722768,0.927453163534563,"SLCO1B3",1
GO:0018027,"GO:0018027","peptidyl-lysine dimethylation","1/473","14/11852",0.43475640722768,0.43475640722768,0.927453163534563,"EEF1AKMT2",1
GO:0018149,"GO:0018149","peptide cross-linking","1/473","14/11852",0.43475640722768,0.43475640722768,0.927453163534563,"EVPL",1
GO:0021756,"GO:0021756","striatum development","1/473","14/11852",0.43475640722768,0.43475640722768,0.927453163534563,"BBS2",1
GO:0030539,"GO:0030539","male genitalia development","1/473","14/11852",0.43475640722768,0.43475640722768,0.927453163534563,"LGR4",1
GO:0031290,"GO:0031290","retinal ganglion cell axon guidance","1/473","14/11852",0.43475640722768,0.43475640722768,0.927453163534563,"NRP1",1
GO:0032486,"GO:0032486","Rap protein signal transduction","1/473","14/11852",0.43475640722768,0.43475640722768,0.927453163534563,"RAP1B",1
GO:0032616,"GO:0032616","interleukin-13 production","1/473","14/11852",0.43475640722768,0.43475640722768,0.927453163534563,"IL18",1
GO:0033194,"GO:0033194","response to hydroperoxide","1/473","14/11852",0.43475640722768,0.43475640722768,0.927453163534563,"STX2",1
GO:0034315,"GO:0034315","regulation of Arp2/3 complex-mediated actin nucleation","1/473","14/11852",0.43475640722768,0.43475640722768,0.927453163534563,"GMFB",1
GO:0035025,"GO:0035025","positive regulation of Rho protein signal transduction","1/473","14/11852",0.43475640722768,0.43475640722768,0.927453163534563,"F2R",1
GO:0035728,"GO:0035728","response to hepatocyte growth factor","1/473","14/11852",0.43475640722768,0.43475640722768,0.927453163534563,"NRP1",1
GO:0036151,"GO:0036151","phosphatidylcholine acyl-chain remodeling","1/473","14/11852",0.43475640722768,0.43475640722768,0.927453163534563,"PNPLA8",1
GO:0036336,"GO:0036336","dendritic cell migration","1/473","14/11852",0.43475640722768,0.43475640722768,0.927453163534563,"PIK3CG",1
GO:0042407,"GO:0042407","cristae formation","1/473","14/11852",0.43475640722768,0.43475640722768,0.927453163534563,"OMA1",1
GO:0043101,"GO:0043101","purine-containing compound salvage","1/473","14/11852",0.43475640722768,0.43475640722768,0.927453163534563,"PRTFDC1",1
GO:0043174,"GO:0043174","nucleoside salvage","1/473","14/11852",0.43475640722768,0.43475640722768,0.927453163534563,"PRTFDC1",1
GO:0044058,"GO:0044058","regulation of digestive system process","1/473","14/11852",0.43475640722768,0.43475640722768,0.927453163534563,"EPB41",1
GO:0044090,"GO:0044090","positive regulation of vacuole organization","1/473","14/11852",0.43475640722768,0.43475640722768,0.927453163534563,"RALB",1
GO:0045649,"GO:0045649","regulation of macrophage differentiation","1/473","14/11852",0.43475640722768,0.43475640722768,0.927453163534563,"CASP8",1
GO:0045898,"GO:0045898","regulation of RNA polymerase II transcriptional preinitiation complex assembly","1/473","14/11852",0.43475640722768,0.43475640722768,0.927453163534563,"ATF7IP",1
GO:0046037,"GO:0046037","GMP metabolic process","1/473","14/11852",0.43475640722768,0.43475640722768,0.927453163534563,"TJP2",1
GO:0046058,"GO:0046058","cAMP metabolic process","1/473","14/11852",0.43475640722768,0.43475640722768,0.927453163534563,"ADCY7",1
GO:0048308,"GO:0048308","organelle inheritance","1/473","14/11852",0.43475640722768,0.43475640722768,0.927453163534563,"GOLGA2",1
GO:0048313,"GO:0048313","Golgi inheritance","1/473","14/11852",0.43475640722768,0.43475640722768,0.927453163534563,"GOLGA2",1
GO:0051299,"GO:0051299","centrosome separation","1/473","14/11852",0.43475640722768,0.43475640722768,0.927453163534563,"NEK2",1
GO:0055003,"GO:0055003","cardiac myofibril assembly","1/473","14/11852",0.43475640722768,0.43475640722768,0.927453163534563,"SMAD4",1
GO:0060343,"GO:0060343","trabecula formation","1/473","14/11852",0.43475640722768,0.43475640722768,0.927453163534563,"FKBP1A",1
GO:0061213,"GO:0061213","positive regulation of mesonephros development","1/473","14/11852",0.43475640722768,0.43475640722768,0.927453163534563,"LGR4",1
GO:0070293,"GO:0070293","renal absorption","1/473","14/11852",0.43475640722768,0.43475640722768,0.927453163534563,"AQP3",1
GO:0071545,"GO:0071545","inositol phosphate catabolic process","1/473","14/11852",0.43475640722768,0.43475640722768,0.927453163534563,"SYNJ2",1
GO:0072215,"GO:0072215","regulation of metanephros development","1/473","14/11852",0.43475640722768,0.43475640722768,0.927453163534563,"STAT1",1
GO:0090083,"GO:0090083","regulation of inclusion body assembly","1/473","14/11852",0.43475640722768,0.43475640722768,0.927453163534563,"SORL1",1
GO:0090190,"GO:0090190","positive regulation of branching involved in ureteric bud morphogenesis","1/473","14/11852",0.43475640722768,0.43475640722768,0.927453163534563,"LGR4",1
GO:0090231,"GO:0090231","regulation of spindle checkpoint","1/473","14/11852",0.43475640722768,0.43475640722768,0.927453163534563,"NDC80",1
GO:0090266,"GO:0090266","regulation of mitotic cell cycle spindle assembly checkpoint","1/473","14/11852",0.43475640722768,0.43475640722768,0.927453163534563,"NDC80",1
GO:0095500,"GO:0095500","acetylcholine receptor signaling pathway","1/473","14/11852",0.43475640722768,0.43475640722768,0.927453163534563,"GNAQ",1
GO:0097202,"GO:0097202","activation of cysteine-type endopeptidase activity","1/473","14/11852",0.43475640722768,0.43475640722768,0.927453163534563,"CASP8",1
GO:1900273,"GO:1900273","positive regulation of long-term synaptic potentiation","1/473","14/11852",0.43475640722768,0.43475640722768,0.927453163534563,"EIF2AK4",1
GO:1902683,"GO:1902683","regulation of receptor localization to synapse","1/473","14/11852",0.43475640722768,0.43475640722768,0.927453163534563,"STX7",1
GO:1902969,"GO:1902969","mitotic DNA replication","1/473","14/11852",0.43475640722768,0.43475640722768,0.927453163534563,"ZMPSTE24",1
GO:1903504,"GO:1903504","regulation of mitotic spindle checkpoint","1/473","14/11852",0.43475640722768,0.43475640722768,0.927453163534563,"NDC80",1
GO:1903831,"GO:1903831","signal transduction involved in cellular response to ammonium ion","1/473","14/11852",0.43475640722768,0.43475640722768,0.927453163534563,"GNAQ",1
GO:2000191,"GO:2000191","regulation of fatty acid transport","1/473","14/11852",0.43475640722768,0.43475640722768,0.927453163534563,"NCOR1",1
GO:2000479,"GO:2000479","regulation of cAMP-dependent protein kinase activity","1/473","14/11852",0.43475640722768,0.43475640722768,0.927453163534563,"PRKAR1A",1
GO:2000679,"GO:2000679","positive regulation of transcription regulatory region DNA binding","1/473","14/11852",0.43475640722768,0.43475640722768,0.927453163534563,"TRIM6",1
GO:2001224,"GO:2001224","positive regulation of neuron migration","1/473","14/11852",0.43475640722768,0.43475640722768,0.927453163534563,"SEMA3A",1
GO:0019882,"GO:0019882","antigen processing and presentation","8/473","181/11852",0.43542537781191,0.43542537781191,0.927453163534563,"TAP1/RAB6A/KIF3C/ACTR10/SNAP23/PSMD5/RAB10/KIFAP3",8
GO:0002886,"GO:0002886","regulation of myeloid leukocyte mediated immunity","2/473","37/11852",0.437824635491553,0.437824635491553,0.927453163534563,"STXBP1/MAVS",2
GO:0009163,"GO:0009163","nucleoside biosynthetic process","2/473","37/11852",0.437824635491553,0.437824635491553,0.927453163534563,"PRTFDC1/NME7",2
GO:0018198,"GO:0018198","peptidyl-cysteine modification","2/473","37/11852",0.437824635491553,0.437824635491553,0.927453163534563,"ZDHHC21/RAB6A",2
GO:0032945,"GO:0032945","negative regulation of mononuclear cell proliferation","2/473","37/11852",0.437824635491553,0.437824635491553,0.927453163534563,"PDE5A/PRKAR1A",2
GO:0044275,"GO:0044275","cellular carbohydrate catabolic process","2/473","37/11852",0.437824635491553,0.437824635491553,0.927453163534563,"PGM2L1/CALM1",2
GO:0050672,"GO:0050672","negative regulation of lymphocyte proliferation","2/473","37/11852",0.437824635491553,0.437824635491553,0.927453163534563,"PDE5A/PRKAR1A",2
GO:0050922,"GO:0050922","negative regulation of chemotaxis","2/473","37/11852",0.437824635491553,0.437824635491553,0.927453163534563,"NRP1/SEMA3A",2
GO:0060393,"GO:0060393","regulation of pathway-restricted SMAD protein phosphorylation","2/473","37/11852",0.437824635491553,0.437824635491553,0.927453163534563,"SMAD4/TTK",2
GO:0061098,"GO:0061098","positive regulation of protein tyrosine kinase activity","2/473","37/11852",0.437824635491553,0.437824635491553,0.927453163534563,"FYN/DLG3",2
GO:0097120,"GO:0097120","receptor localization to synapse","2/473","37/11852",0.437824635491553,0.437824635491553,0.927453163534563,"DLG3/STX7",2
GO:0006936,"GO:0006936","muscle contraction","9/473","206/11852",0.43914030193015,0.43914030193015,0.927453163534563,"F2R/PIK3CG/PDE5A/SORBS1/DSC2/TMEM38B/BBS2/CALM2/CALM1",9
GO:0006816,"GO:0006816","calcium ion transport","11/473","255/11852",0.439687237413345,0.439687237413345,0.927453163534563,"FKBP1A/EPB41/THADA/PLCH1/F2R/PIK3CG/FYN/TMEM38B/CALM2/CALM1/ZMPSTE24",11
GO:0097479,"GO:0097479","synaptic vesicle localization","5/473","109/11852",0.440864235361839,0.440864235361839,0.927453163534563,"STXBP1/STX2/RAP1B/SNAP23/TMEM230",5
GO:0000271,"GO:0000271","polysaccharide biosynthetic process","3/473","61/11852",0.441822107078648,0.441822107078648,0.927453163534563,"SORBS1/PGM2L1/EPM2AIP1",3
GO:0043242,"GO:0043242","negative regulation of protein complex disassembly","3/473","61/11852",0.441822107078648,0.441822107078648,0.927453163534563,"HDAC6/CARMIL1/MTPN",3
GO:0043507,"GO:0043507","positive regulation of JUN kinase activity","3/473","61/11852",0.441822107078648,0.441822107078648,0.927453163534563,"MAP3K13/TNIK/MDFIC",3
GO:0043967,"GO:0043967","histone H4 acetylation","3/473","61/11852",0.441822107078648,0.441822107078648,0.927453163534563,"KAT6B/YEATS4/ZMPSTE24",3
GO:0071260,"GO:0071260","cellular response to mechanical stimulus","3/473","61/11852",0.441822107078648,0.441822107078648,0.927453163534563,"SLC38A2/CASP8/MTPN",3
GO:0097194,"GO:0097194","execution phase of apoptosis","3/473","61/11852",0.441822107078648,0.441822107078648,0.927453163534563,"MADD/CASP8/RFFL",3
GO:0005976,"GO:0005976","polysaccharide metabolic process","4/473","85/11852",0.441969665723053,0.441969665723053,0.927453163534563,"SORBS1/PGM2L1/EPM2AIP1/CALM1",4
GO:0009855,"GO:0009855","determination of bilateral symmetry","4/473","85/11852",0.441969665723053,0.441969665723053,0.927453163534563,"C2CD3/DYNC2LI1/GAS8/TGFBR2",4
GO:0032006,"GO:0032006","regulation of TOR signaling","4/473","85/11852",0.441969665723053,0.441969665723053,0.927453163534563,"RFFL/RRAGA/ARNTL/ZMPSTE24",4
GO:0034440,"GO:0034440","lipid oxidation","4/473","85/11852",0.441969665723053,0.441969665723053,0.927453163534563,"ACOX1/PDK4/AUH/EHHADH",4
GO:0043271,"GO:0043271","negative regulation of ion transport","4/473","85/11852",0.441969665723053,0.441969665723053,0.927453163534563,"THADA/CALM2/ARL6IP5/CALM1",4
GO:0061337,"GO:0061337","cardiac conduction","4/473","85/11852",0.441969665723053,0.441969665723053,0.927453163534563,"DSC2/CALM2/CALM1/ZMPSTE24",4
GO:0034330,"GO:0034330","cell junction organization","10/473","231/11852",0.442222189139341,0.442222189139341,0.927453163534563,"ILK/PHLDB2/F2R/SORBS1/PDCD6IP/NRP1/PTK2/RAP1B/VMP1/ARF6",10
GO:0051258,"GO:0051258","protein polymerization","10/473","231/11852",0.442222189139341,0.442222189139341,0.927453163534563,"GOLGA2/TUBGCP5/TPPP/CARMIL1/RHOBTB1/GMFB/MTPN/TRIM6/ARF6/CDKN1B",10
GO:0009259,"GO:0009259","ribonucleotide metabolic process","18/473","428/11852",0.443987498191869,0.443987498191869,0.927453163534563,"ACOT13/NCOR1/ACSS2/ADCY7/TJP2/PDK4/PDE5A/PGM2L1/MOCS2/DCAKD/COX7C/COA6/NDUFB6/PDP1/ATP6V1A/NDUFC2/NME7/PPCS",18
GO:0002791,"GO:0002791","regulation of peptide secretion","13/473","305/11852",0.444307171654157,0.444307171654157,0.927453163534563,"MYO18A/DPP4/FRMD8/F2R/ARL2BP/GOLPH3L/MAVS/LGR4/SOX4/TRIM6/ARNTL/ARF6/CD58",13
GO:0006066,"GO:0006066","alcohol metabolic process","11/473","256/11852",0.444829296206275,0.444829296206275,0.927453163534563,"SGPP2/ACSS2/PLCH1/TTC39B/SDR16C5/SORL1/SYNJ2/LDLR/LBR/CYP1B1/CALM1",11
GO:0015850,"GO:0015850","organic hydroxy compound transport","6/473","134/11852",0.446355398595082,0.446355398595082,0.927453163534563,"KDM5B/TTC39B/ABCA5/LDLR/AQP3/SLCO1B3",6
GO:0032388,"GO:0032388","positive regulation of intracellular transport","8/473","183/11852",0.44759796277199,0.44759796277199,0.927453163534563,"RUFY3/SPAG5/FYN/STXBP1/MAVS/SORL1/MDM2/RHOU",8
GO:0034404,"GO:0034404","nucleobase-containing small molecule biosynthetic process","8/473","183/11852",0.44759796277199,0.44759796277199,0.927453163534563,"NCOR1/PDE5A/PGM2L1/SAMHD1/PRTFDC1/SMPDL3A/NUDT12/NME7",8
GO:0046474,"GO:0046474","glycerophospholipid biosynthetic process","8/473","183/11852",0.44759796277199,0.44759796277199,0.927453163534563,"PIGB/PIK3CG/SYNJ2/PIGM/AGPAT4/ABHD3/LIPH/PLEKHA2",8
GO:1901214,"GO:1901214","regulation of neuron death","10/473","232/11852",0.447625160592529,0.447625160592529,0.927453163534563,"ILK/STAMBP/F2R/FYN/CASP8/STXBP1/SORL1/NRP1/RETREG1/TRIM2",10
GO:0051262,"GO:0051262","protein tetramerization","5/473","110/11852",0.448727434462539,0.448727434462539,0.927453163534563,"ACOT13/GOLGA2/SAMHD1/ME1/CRYZ",5
GO:0050878,"GO:0050878","regulation of body fluid levels","13/473","306/11852",0.449019771982687,0.449019771982687,0.927453163534563,"ILK/ADCY7/VAV3/F2R/PIK3CG/PLAT/FYN/GNAQ/STXBP1/CARMIL1/AQP3/PRKAR1A/C1GALT1C1",13
GO:0070646,"GO:0070646","protein modification by small protein removal","11/473","257/11852",0.449967187442152,0.449967187442152,0.927453163534563,"SMAD4/USP19/STAMBP/ABRAXAS1/UCHL3/MINDY1/MDM2/UBE2D1/MINDY3/PSMD5/ATXN3",11
GO:0001822,"GO:0001822","kidney development","9/473","208/11852",0.450563770134343,0.450563770134343,0.927453163534563,"ILK/PBX1/KANK2/SMAD4/NRP1/STAT1/LGR4/SOX4/ZMPSTE24",9
GO:0007612,"GO:0007612","learning","4/473","86/11852",0.450886311982853,0.450886311982853,0.927453163534563,"EIF2AK4/FYN/ATXN1/GMFB",4
GO:0009799,"GO:0009799","specification of symmetry","4/473","86/11852",0.450886311982853,0.450886311982853,0.927453163534563,"C2CD3/DYNC2LI1/GAS8/TGFBR2",4
GO:0001947,"GO:0001947","heart looping","2/473","38/11852",0.451451234018912,0.451451234018912,0.927453163534563,"C2CD3/TGFBR2",2
GO:0007631,"GO:0007631","feeding behavior","2/473","38/11852",0.451451234018912,0.451451234018912,0.927453163534563,"EIF2AK4/FYN",2
GO:0009435,"GO:0009435","NAD biosynthetic process","2/473","38/11852",0.451451234018912,0.451451234018912,0.927453163534563,"PGM2L1/NUDT12",2
GO:0045022,"GO:0045022","early endosome to late endosome transport","2/473","38/11852",0.451451234018912,0.451451234018912,0.927453163534563,"AKTIP/HOOK3",2
GO:0050435,"GO:0050435","amyloid-beta metabolic process","2/473","38/11852",0.451451234018912,0.451451234018912,0.927453163534563,"SORL1/PSENEN",2
GO:0009896,"GO:0009896","positive regulation of catabolic process","15/473","356/11852",0.452259304627826,0.452259304627826,0.927453163534563,"HDAC6/EIF2AK4/FBXL5/CUL4B/SORL1/LDLR/PTK2/MDM2/RNFT1/PAFAH1B2/TMEM59/RALB/ATXN3/CDKN1B/SCOC",15
GO:0002702,"GO:0002702","positive regulation of production of molecular mediator of immune response","3/473","62/11852",0.452374054316412,0.452374054316412,0.927453163534563,"MAVS/TRIM6/IL18",3
GO:0043154,"GO:0043154","negative regulation of cysteine-type endopeptidase activity involved in apoptotic process","3/473","62/11852",0.452374054316412,0.452374054316412,0.927453163534563,"SERPINB9/RFFL/MDM2",3
GO:0055017,"GO:0055017","cardiac muscle tissue growth","3/473","62/11852",0.452374054316412,0.452374054316412,0.927453163534563,"JARID2/TGFBR2/PRKAR1A",3
GO:0071479,"GO:0071479","cellular response to ionizing radiation","3/473","62/11852",0.452374054316412,0.452374054316412,0.927453163534563,"MDM2/GTF2H5/ZMPSTE24",3
GO:1900006,"GO:1900006","positive regulation of dendrite development","3/473","62/11852",0.452374054316412,0.452374054316412,0.927453163534563,"ILK/CDKL5/ZMYND8",3
GO:1900407,"GO:1900407","regulation of cellular response to oxidative stress","3/473","62/11852",0.452374054316412,0.452374054316412,0.927453163534563,"HDAC6/FYN/FUT8",3
GO:0009615,"GO:0009615","response to virus","10/473","233/11852",0.453022218773007,0.453022218773007,0.927453163534563,"EIF2AK4/TRIM5/MAVS/EIF2AK2/STAT2/SAMHD1/STAT1/IFNAR1/TRIM6/ZMPSTE24",10
GO:0010769,"GO:0010769","regulation of cell morphogenesis involved in differentiation","10/473","233/11852",0.453022218773007,0.453022218773007,0.927453163534563,"ILK/CDKL5/KIF13B/RUFY3/MAP3K13/TNIK/CARMIL1/NRP1/PTK2/SEMA3A",10
GO:0090316,"GO:0090316","positive regulation of intracellular protein transport","6/473","135/11852",0.453448976112314,0.453448976112314,0.927453163534563,"RUFY3/FYN/MAVS/SORL1/MDM2/RHOU",6
GO:0006888,"GO:0006888","ER to Golgi vesicle-mediated transport","8/473","184/11852",0.453669767002187,0.453669767002187,0.927453163534563,"GOLGA2/TRAPPC11/TRAPPC6B/SORL1/ACTR10/TMED7/VAPA/IER3IP1",8
GO:0050808,"GO:0050808","synapse organization","11/473","258/11852",0.455100084242273,0.455100084242273,0.927453163534563,"HDAC6/CDKL5/FLRT3/ZMYND8/ABHD17C/F2R/FYN/DLG3/NRP1/PTK2/ARF6",11
GO:0060537,"GO:0060537","muscle tissue development","11/473","258/11852",0.455100084242273,0.455100084242273,0.927453163534563,"FKBP1A/SMAD4/USP19/SGCB/JARID2/TGFBR2/MTPN/PRKAR1A/ARNTL/SAP30/ZMPSTE24",11
GO:0001736,"GO:0001736","establishment of planar polarity","5/473","111/11852",0.456562128604149,0.456562128604149,0.927453163534563,"DLG3/PRICKLE2/DAAM1/PSMD5/VANGL1",5
GO:0007164,"GO:0007164","establishment of tissue polarity","5/473","111/11852",0.456562128604149,0.456562128604149,0.927453163534563,"DLG3/PRICKLE2/DAAM1/PSMD5/VANGL1",5
GO:0001916,"GO:0001916","positive regulation of T cell mediated cytotoxicity","1/473","15/11852",0.457341321856951,0.457341321856951,0.927453163534563,"STX7",1
GO:0001956,"GO:0001956","positive regulation of neurotransmitter secretion","1/473","15/11852",0.457341321856951,0.457341321856951,0.927453163534563,"STXBP1",1
GO:0002052,"GO:0002052","positive regulation of neuroblast proliferation","1/473","15/11852",0.457341321856951,0.457341321856951,0.927453163534563,"ASPM",1
GO:0002320,"GO:0002320","lymphoid progenitor cell differentiation","1/473","15/11852",0.457341321856951,0.457341321856951,0.927453163534563,"SOX4",1
GO:0002483,"GO:0002483","antigen processing and presentation of endogenous peptide antigen","1/473","15/11852",0.457341321856951,0.457341321856951,0.927453163534563,"TAP1",1
GO:0002825,"GO:0002825","regulation of T-helper 1 type immune response","1/473","15/11852",0.457341321856951,0.457341321856951,0.927453163534563,"IL18",1
GO:0006044,"GO:0006044","N-acetylglucosamine metabolic process","1/473","15/11852",0.457341321856951,0.457341321856951,0.927453163534563,"GNE",1
GO:0006123,"GO:0006123","mitochondrial electron transport, cytochrome c to oxygen","1/473","15/11852",0.457341321856951,0.457341321856951,0.927453163534563,"COX7C",1
GO:0006895,"GO:0006895","Golgi to endosome transport","1/473","15/11852",0.457341321856951,0.457341321856951,0.927453163534563,"WIPI1",1
GO:0007205,"GO:0007205","protein kinase C-activating G protein-coupled receptor signaling pathway","1/473","15/11852",0.457341321856951,0.457341321856951,0.927453163534563,"F2R",1
GO:0007398,"GO:0007398","ectoderm development","1/473","15/11852",0.457341321856951,0.457341321856951,0.927453163534563,"STX2",1
GO:0007628,"GO:0007628","adult walking behavior","1/473","15/11852",0.457341321856951,0.457341321856951,0.927453163534563,"ZMPSTE24",1
GO:0010575,"GO:0010575","positive regulation of vascular endothelial growth factor production","1/473","15/11852",0.457341321856951,0.457341321856951,0.927453163534563,"CYP1B1",1
GO:0010818,"GO:0010818","T cell chemotaxis","1/473","15/11852",0.457341321856951,0.457341321856951,0.927453163534563,"PIK3CG",1
GO:0010888,"GO:0010888","negative regulation of lipid storage","1/473","15/11852",0.457341321856951,0.457341321856951,0.927453163534563,"TTC39B",1
GO:0016446,"GO:0016446","somatic hypermutation of immunoglobulin genes","1/473","15/11852",0.457341321856951,0.457341321856951,0.927453163534563,"SAMHD1",1
GO:0019646,"GO:0019646","aerobic electron transport chain","1/473","15/11852",0.457341321856951,0.457341321856951,0.927453163534563,"COX7C",1
GO:0019885,"GO:0019885","antigen processing and presentation of endogenous peptide antigen via MHC class I","1/473","15/11852",0.457341321856951,0.457341321856951,0.927453163534563,"TAP1",1
GO:0021697,"GO:0021697","cerebellar cortex formation","1/473","15/11852",0.457341321856951,0.457341321856951,0.927453163534563,"MTPN",1
GO:0030011,"GO:0030011","maintenance of cell polarity","1/473","15/11852",0.457341321856951,0.457341321856951,0.927453163534563,"PDCD6IP",1
GO:0030397,"GO:0030397","membrane disassembly","1/473","15/11852",0.457341321856951,0.457341321856951,0.927453163534563,"CCNB2",1
GO:0031639,"GO:0031639","plasminogen activation","1/473","15/11852",0.457341321856951,0.457341321856951,0.927453163534563,"PLAT",1
GO:0031664,"GO:0031664","regulation of lipopolysaccharide-mediated signaling pathway","1/473","15/11852",0.457341321856951,0.457341321856951,0.927453163534563,"TRIM5",1
GO:0032816,"GO:0032816","positive regulation of natural killer cell activation","1/473","15/11852",0.457341321856951,0.457341321856951,0.927453163534563,"IL18",1
GO:0032967,"GO:0032967","positive regulation of collagen biosynthetic process","1/473","15/11852",0.457341321856951,0.457341321856951,0.927453163534563,"F2R",1
GO:0033262,"GO:0033262","regulation of nuclear cell cycle DNA replication","1/473","15/11852",0.457341321856951,0.457341321856951,0.927453163534563,"ZMPSTE24",1
GO:0035313,"GO:0035313","wound healing, spreading of epidermal cells","1/473","15/11852",0.457341321856951,0.457341321856951,0.927453163534563,"PHLDB2",1
GO:0035970,"GO:0035970","peptidyl-threonine dephosphorylation","1/473","15/11852",0.457341321856951,0.457341321856951,0.927453163534563,"PDP1",1
GO:0036065,"GO:0036065","fucosylation","1/473","15/11852",0.457341321856951,0.457341321856951,0.927453163534563,"FUT8",1
GO:0036120,"GO:0036120","cellular response to platelet-derived growth factor stimulus","1/473","15/11852",0.457341321856951,0.457341321856951,0.927453163534563,"FYN",1
GO:0036344,"GO:0036344","platelet morphogenesis","1/473","15/11852",0.457341321856951,0.457341321856951,0.927453163534563,"C1GALT1C1",1
GO:0042921,"GO:0042921","glucocorticoid receptor signaling pathway","1/473","15/11852",0.457341321856951,0.457341321856951,0.927453163534563,"ARNTL",1
GO:0044342,"GO:0044342","type B pancreatic cell proliferation","1/473","15/11852",0.457341321856951,0.457341321856951,0.927453163534563,"SGPP2",1
GO:0044794,"GO:0044794","positive regulation by host of viral process","1/473","15/11852",0.457341321856951,0.457341321856951,0.927453163534563,"VAPA",1
GO:0045116,"GO:0045116","protein neddylation","1/473","15/11852",0.457341321856951,0.457341321856951,0.927453163534563,"UBA3",1
GO:0045117,"GO:0045117","azole transport","1/473","15/11852",0.457341321856951,0.457341321856951,0.927453163534563,"SNAP23",1
GO:0045624,"GO:0045624","positive regulation of T-helper cell differentiation","1/473","15/11852",0.457341321856951,0.457341321856951,0.927453163534563,"IL18",1
GO:0045686,"GO:0045686","negative regulation of glial cell differentiation","1/473","15/11852",0.457341321856951,0.457341321856951,0.927453163534563,"LDLR",1
GO:0045956,"GO:0045956","positive regulation of calcium ion-dependent exocytosis","1/473","15/11852",0.457341321856951,0.457341321856951,0.927453163534563,"STXBP1",1
GO:0046500,"GO:0046500","S-adenosylmethionine metabolic process","1/473","15/11852",0.457341321856951,0.457341321856951,0.927453163534563,"MAT2B",1
GO:0046519,"GO:0046519","sphingoid metabolic process","1/473","15/11852",0.457341321856951,0.457341321856951,0.927453163534563,"SGPP2",1
GO:0046597,"GO:0046597","negative regulation of viral entry into host cell","1/473","15/11852",0.457341321856951,0.457341321856951,0.927453163534563,"TRIM5",1
GO:0048643,"GO:0048643","positive regulation of skeletal muscle tissue development","1/473","15/11852",0.457341321856951,0.457341321856951,0.927453163534563,"ARNTL",1
GO:0051081,"GO:0051081","nuclear envelope disassembly","1/473","15/11852",0.457341321856951,0.457341321856951,0.927453163534563,"CCNB2",1
GO:0051354,"GO:0051354","negative regulation of oxidoreductase activity","1/473","15/11852",0.457341321856951,0.457341321856951,0.927453163534563,"HDAC6",1
GO:0051497,"GO:0051497","negative regulation of stress fiber assembly","1/473","15/11852",0.457341321856951,0.457341321856951,0.927453163534563,"PHLDB2",1
GO:0051546,"GO:0051546","keratinocyte migration","1/473","15/11852",0.457341321856951,0.457341321856951,0.927453163534563,"ARF6",1
GO:0051571,"GO:0051571","positive regulation of histone H3-K4 methylation","1/473","15/11852",0.457341321856951,0.457341321856951,0.927453163534563,"SMAD4",1
GO:0051767,"GO:0051767","nitric-oxide synthase biosynthetic process","1/473","15/11852",0.457341321856951,0.457341321856951,0.927453163534563,"STAT1",1
GO:0051769,"GO:0051769","regulation of nitric-oxide synthase biosynthetic process","1/473","15/11852",0.457341321856951,0.457341321856951,0.927453163534563,"STAT1",1
GO:0051895,"GO:0051895","negative regulation of focal adhesion assembly","1/473","15/11852",0.457341321856951,0.457341321856951,0.927453163534563,"PHLDB2",1
GO:0051900,"GO:0051900","regulation of mitochondrial depolarization","1/473","15/11852",0.457341321856951,0.457341321856951,0.927453163534563,"MLLT11",1
GO:0051930,"GO:0051930","regulation of sensory perception of pain","1/473","15/11852",0.457341321856951,0.457341321856951,0.927453163534563,"F2R",1
GO:0051968,"GO:0051968","positive regulation of synaptic transmission, glutamatergic","1/473","15/11852",0.457341321856951,0.457341321856951,0.927453163534563,"STXBP1",1
GO:0060307,"GO:0060307","regulation of ventricular cardiac muscle cell membrane repolarization","1/473","15/11852",0.457341321856951,0.457341321856951,0.927453163534563,"ZMPSTE24",1
GO:0071305,"GO:0071305","cellular response to vitamin D","1/473","15/11852",0.457341321856951,0.457341321856951,0.927453163534563,"KANK2",1
GO:0089718,"GO:0089718","amino acid import across plasma membrane","1/473","15/11852",0.457341321856951,0.457341321856951,0.927453163534563,"ARL6IP5",1
GO:1900242,"GO:1900242","regulation of synaptic vesicle endocytosis","1/473","15/11852",0.457341321856951,0.457341321856951,0.927453163534563,"VAMP4",1
GO:1901881,"GO:1901881","positive regulation of protein depolymerization","1/473","15/11852",0.457341321856951,0.457341321856951,0.927453163534563,"CARMIL1",1
GO:1902187,"GO:1902187","negative regulation of viral release from host cell","1/473","15/11852",0.457341321856951,0.457341321856951,0.927453163534563,"TRIM5",1
GO:1902884,"GO:1902884","positive regulation of response to oxidative stress","1/473","15/11852",0.457341321856951,0.457341321856951,0.927453163534563,"HDAC6",1
GO:1903429,"GO:1903429","regulation of cell maturation","1/473","15/11852",0.457341321856951,0.457341321856951,0.927453163534563,"MAP3K13",1
GO:1904754,"GO:1904754","positive regulation of vascular associated smooth muscle cell migration","1/473","15/11852",0.457341321856951,0.457341321856951,0.927453163534563,"MDM2",1
GO:2000369,"GO:2000369","regulation of clathrin-dependent endocytosis","1/473","15/11852",0.457341321856951,0.457341321856951,0.927453163534563,"AAK1",1
GO:2000726,"GO:2000726","negative regulation of cardiac muscle cell differentiation","1/473","15/11852",0.457341321856951,0.457341321856951,0.927453163534563,"SMAD4",1
GO:2000757,"GO:2000757","negative regulation of peptidyl-lysine acetylation","1/473","15/11852",0.457341321856951,0.457341321856951,0.927453163534563,"SDR16C5",1
GO:2001267,"GO:2001267","regulation of cysteine-type endopeptidase activity involved in apoptotic signaling pathway","1/473","15/11852",0.457341321856951,0.457341321856951,0.927453163534563,"CASP8",1
GO:1905269,"GO:1905269","positive regulation of chromatin organization","4/473","87/11852",0.45975697704037,0.45975697704037,0.927453163534563,"SMAD4/SDR16C5/JARID2/ATF7IP",4
GO:0002699,"GO:0002699","positive regulation of immune effector process","6/473","136/11852",0.46052178344308,0.46052178344308,0.927453163534563,"MYO18A/STXBP1/MAVS/STX7/TRIM6/IL18",6
GO:0051170,"GO:0051170","import into nucleus","6/473","136/11852",0.46052178344308,0.46052178344308,0.927453163534563,"MAVS/KPNA2/HTATIP2/MDFIC/ARNTL/NXT2",6
GO:0046928,"GO:0046928","regulation of neurotransmitter secretion","3/473","63/11852",0.462843065695197,0.462843065695197,0.927453163534563,"KCNMB4/STXBP1/RAP1B",3
GO:0048864,"GO:0048864","stem cell development","3/473","63/11852",0.462843065695197,0.462843065695197,0.927453163534563,"NRP1/MSI2/SEMA3A",3
GO:0051298,"GO:0051298","centrosome duplication","3/473","63/11852",0.462843065695197,0.462843065695197,0.927453163534563,"C2CD3/PDCD6IP/CHMP1B",3
GO:0051492,"GO:0051492","regulation of stress fiber assembly","3/473","63/11852",0.462843065695197,0.462843065695197,0.927453163534563,"PHLDB2/CARMIL1/NRP1",3
GO:0048762,"GO:0048762","mesenchymal cell differentiation","7/473","161/11852",0.46347438851576,0.46347438851576,0.927453163534563,"USF3/SMAD4/PHLDB2/NRP1/TGFBR2/STAT1/SEMA3A",7
GO:0007178,"GO:0007178","transmembrane receptor protein serine/threonine kinase signaling pathway","10/473","235/11852",0.463794821312026,0.463794821312026,0.927453163534563,"FKBP1A/ILK/SMAD4/ZNF8/FUT8/SORL1/TGFBR2/PTK2/UBE2D1/TTK",10
GO:0015980,"GO:0015980","energy derivation by oxidation of organic compounds","10/473","235/11852",0.463794821312026,0.463794821312026,0.927453163534563,"MTFR1L/SORBS1/PGM2L1/COX7C/COQ10B/COA6/NDUFB6/NDUFC2/EPM2AIP1/CALM1",10
GO:0006195,"GO:0006195","purine nucleotide catabolic process","2/473","39/11852",0.464888171572711,0.464888171572711,0.927453163534563,"PDE5A/SAMHD1",2
GO:0009409,"GO:0009409","response to cold","2/473","39/11852",0.464888171572711,0.464888171572711,0.927453163534563,"EIF2AK4/CASP8",2
GO:0031638,"GO:0031638","zymogen activation","2/473","39/11852",0.464888171572711,0.464888171572711,0.927453163534563,"PLAT/CASP8",2
GO:0045005,"GO:0045005","DNA-dependent DNA replication maintenance of fidelity","2/473","39/11852",0.464888171572711,0.464888171572711,0.927453163534563,"SAMHD1/PRIMPOL",2
GO:0045453,"GO:0045453","bone resorption","2/473","39/11852",0.464888171572711,0.464888171572711,0.927453163534563,"PDK4/SNX10",2
GO:0048747,"GO:0048747","muscle fiber development","2/473","39/11852",0.464888171572711,0.464888171572711,0.927453163534563,"SGCB/ZMPSTE24",2
GO:0051293,"GO:0051293","establishment of spindle localization","2/473","39/11852",0.464888171572711,0.464888171572711,0.927453163534563,"GPSM2/NDC80",2
GO:0061371,"GO:0061371","determination of heart left/right asymmetry","2/473","39/11852",0.464888171572711,0.464888171572711,0.927453163534563,"C2CD3/TGFBR2",2
GO:0070664,"GO:0070664","negative regulation of leukocyte proliferation","2/473","39/11852",0.464888171572711,0.464888171572711,0.927453163534563,"PDE5A/PRKAR1A",2
GO:0090049,"GO:0090049","regulation of cell migration involved in sprouting angiogenesis","2/473","39/11852",0.464888171572711,0.464888171572711,0.927453163534563,"MAP3K3/NRP1",2
GO:0090183,"GO:0090183","regulation of kidney development","2/473","39/11852",0.464888171572711,0.464888171572711,0.927453163534563,"STAT1/LGR4",2
GO:2000378,"GO:2000378","negative regulation of reactive oxygen species metabolic process","2/473","39/11852",0.464888171572711,0.464888171572711,0.927453163534563,"HDAC6/FYN",2
GO:0001503,"GO:0001503","ossification","11/473","260/11852",0.465347631448987,0.465347631448987,0.927453163534563,"ILK/PBX1/IFT80/NBR1/PTK2/ZBTB40/TMEM38B/LGR4/ASF1A/SNX10/ZMPSTE24",11
GO:0045930,"GO:0045930","negative regulation of mitotic cell cycle","12/473","285/11852",0.466678256263852,0.466678256263852,0.927453163534563,"KANK2/CDC25C/CDC14B/ZFYVE19/MDM2/SOX4/TTK/BUB1/PSMD5/NDC80/CDKN2C/CDKN1B",12
GO:0016569,"GO:0016569","covalent chromatin modification","17/473","409/11852",0.467163257115443,0.467163257115443,0.927453163534563,"HDAC6/SMAD4/HDAC11/KDM5B/SDR16C5/MTA3/MBD2/CUL4B/NCOA3/KAT6B/JARID2/ATF7IP/YEATS4/BMI1/SAP30/EID1/ZMPSTE24",17
GO:0031146,"GO:0031146","SCF-dependent proteasomal ubiquitin-dependent protein catabolic process","4/473","88/11852",0.46857820204857,0.46857820204857,0.927453163534563,"AMN1/FBXL5/CUL4B/PSMD5",4
GO:0072089,"GO:0072089","stem cell proliferation","4/473","88/11852",0.46857820204857,0.46857820204857,0.927453163534563,"ASPM/EIF2AK2/RAB10/N4BP2L2",4
GO:0010821,"GO:0010821","regulation of mitochondrion organization","7/473","162/11852",0.469956197108757,0.469956197108757,0.927453163534563,"HDAC6/BIK/CASP8/MLLT11/STAT2/OMA1/RHOU",7
GO:0045444,"GO:0045444","fat cell differentiation","7/473","162/11852",0.469956197108757,0.469956197108757,0.927453163534563,"HDAC6/ZADH2/BBS2/ARNTL/ARL4A/BBS9/CREBL2",7
GO:0070997,"GO:0070997","neuron death","11/473","261/11852",0.470460673381296,0.470460673381296,0.927453163534563,"ILK/STAMBP/F2R/FYN/CASP8/STXBP1/CIT/SORL1/NRP1/RETREG1/TRIM2",11
GO:0034332,"GO:0034332","adherens junction organization","5/473","113/11852",0.472135772758606,0.472135772758606,0.927453163534563,"PHLDB2/SORBS1/NRP1/PTK2/ARF6",5
GO:0006513,"GO:0006513","protein monoubiquitination","3/473","64/11852",0.473224263793421,0.473224263793421,0.927453163534563,"TSG101/CUL4B/BMI1",3
GO:0055024,"GO:0055024","regulation of cardiac muscle tissue development","3/473","64/11852",0.473224263793421,0.473224263793421,0.927453163534563,"SMAD4/JARID2/TGFBR2",3
GO:0060998,"GO:0060998","regulation of dendritic spine development","3/473","64/11852",0.473224263793421,0.473224263793421,0.927453163534563,"CDKL5/ZMYND8/ARF6",3
GO:0061136,"GO:0061136","regulation of proteasomal protein catabolic process","7/473","163/11852",0.476418982956261,0.476418982956261,0.927453163534563,"USP19/MDM2/ERLEC1/RNFT1/ATXN3/GABARAPL2/PBK",7
GO:0006790,"GO:0006790","sulfur compound metabolic process","12/473","287/11852",0.476446966243798,0.476446966243798,0.927453163534563,"ACOT13/ACSS2/PDK4/TPK1/B4GAT1/PDP1/MTHFD2L/MAT2B/ADI1/NUBPL/GLRX2/PPCS",12
GO:1905114,"GO:1905114","cell surface receptor signaling pathway involved in cell-cell signaling","20/473","486/11852",0.476813782232785,0.476813782232785,0.927453163534563,"ILK/ZMYND8/AGO4/IFT80/ASPM/MBD2/GNAQ/TNIK/PRICKLE2/CALCOCO1/LGR4/SOX4/DAAM1/HBP1/DIXDC1/PSMD5/MDFIC/ARNTL/VANGL1/CALM1",20
GO:0000079,"GO:0000079","regulation of cyclin-dependent protein serine/threonine kinase activity","4/473","89/11852",0.477346672965977,0.477346672965977,0.927453163534563,"CDC25C/CCNB2/CDKN2C/CDKN1B",4
GO:0007569,"GO:0007569","cell aging","4/473","89/11852",0.477346672965977,0.477346672965977,0.927453163534563,"ILK/MAP3K3/ARNTL/ZMPSTE24",4
GO:0042129,"GO:0042129","regulation of T cell proliferation","4/473","89/11852",0.477346672965977,0.477346672965977,0.927453163534563,"PDE5A/TGFBR2/PRKAR1A/IL18",4
GO:1903050,"GO:1903050","regulation of proteolysis involved in cellular protein catabolic process","8/473","188/11852",0.477829977652613,0.477829977652613,0.927453163534563,"USP19/PTK2/MDM2/ERLEC1/RNFT1/ATXN3/GABARAPL2/PBK",8
GO:0001910,"GO:0001910","regulation of leukocyte mediated cytotoxicity","2/473","40/11852",0.478128865553188,0.478128865553188,0.927453163534563,"SERPINB9/STX7",2
GO:0001961,"GO:0001961","positive regulation of cytokine-mediated signaling pathway","2/473","40/11852",0.478128865553188,0.478128865553188,0.927453163534563,"MAVS/TRIM6",2
GO:0006221,"GO:0006221","pyrimidine nucleotide biosynthetic process","2/473","40/11852",0.478128865553188,0.478128865553188,0.927453163534563,"AGPAT4/NME7",2
GO:0010718,"GO:0010718","positive regulation of epithelial to mesenchymal transition","2/473","40/11852",0.478128865553188,0.478128865553188,0.927453163534563,"SMAD4/TGFBR2",2
GO:0030239,"GO:0030239","myofibril assembly","2/473","40/11852",0.478128865553188,0.478128865553188,0.927453163534563,"SMAD4/PRKAR1A",2
GO:0031663,"GO:0031663","lipopolysaccharide-mediated signaling pathway","2/473","40/11852",0.478128865553188,0.478128865553188,0.927453163534563,"TRIM5/IL18",2
GO:0032873,"GO:0032873","negative regulation of stress-activated MAPK cascade","2/473","40/11852",0.478128865553188,0.478128865553188,0.927453163534563,"NCOR1/PBK",2
GO:0051496,"GO:0051496","positive regulation of stress fiber assembly","2/473","40/11852",0.478128865553188,0.478128865553188,0.927453163534563,"CARMIL1/NRP1",2
GO:0051646,"GO:0051646","mitochondrion localization","2/473","40/11852",0.478128865553188,0.478128865553188,0.927453163534563,"HDAC6/ACTR10",2
GO:0070303,"GO:0070303","negative regulation of stress-activated protein kinase signaling cascade","2/473","40/11852",0.478128865553188,0.478128865553188,0.927453163534563,"NCOR1/PBK",2
GO:0099024,"GO:0099024","plasma membrane invagination","2/473","40/11852",0.478128865553188,0.478128865553188,0.927453163534563,"RHOBTB1/SNX18",2
GO:1904705,"GO:1904705","regulation of vascular smooth muscle cell proliferation","2/473","40/11852",0.478128865553188,0.478128865553188,0.927453163534563,"MDM2/CDKN1B",2
GO:1990874,"GO:1990874","vascular smooth muscle cell proliferation","2/473","40/11852",0.478128865553188,0.478128865553188,0.927453163534563,"MDM2/CDKN1B",2
GO:2000514,"GO:2000514","regulation of CD4-positive, alpha-beta T cell activation","2/473","40/11852",0.478128865553188,0.478128865553188,0.927453163534563,"TGFBR2/IL18",2
GO:2001259,"GO:2001259","positive regulation of cation channel activity","2/473","40/11852",0.478128865553188,0.478128865553188,0.927453163534563,"CALM2/CALM1",2
GO:0002566,"GO:0002566","somatic diversification of immune receptors via somatic mutation","1/473","16/11852",0.479025663730877,0.479025663730877,0.927453163534563,"SAMHD1",1
GO:0006448,"GO:0006448","regulation of translational elongation","1/473","16/11852",0.479025663730877,0.479025663730877,0.927453163534563,"DPH6",1
GO:0006450,"GO:0006450","regulation of translational fidelity","1/473","16/11852",0.479025663730877,0.479025663730877,0.927453163534563,"DTD2",1
GO:0006925,"GO:0006925","inflammatory cell apoptotic process","1/473","16/11852",0.479025663730877,0.479025663730877,0.927453163534563,"ZMPSTE24",1
GO:0008210,"GO:0008210","estrogen metabolic process","1/473","16/11852",0.479025663730877,0.479025663730877,0.927453163534563,"CYP1B1",1
GO:0009148,"GO:0009148","pyrimidine nucleoside triphosphate biosynthetic process","1/473","16/11852",0.479025663730877,0.479025663730877,0.927453163534563,"NME7",1
GO:0010225,"GO:0010225","response to UV-C","1/473","16/11852",0.479025663730877,0.479025663730877,0.927453163534563,"MDM2",1
GO:0010560,"GO:0010560","positive regulation of glycoprotein biosynthetic process","1/473","16/11852",0.479025663730877,0.479025663730877,0.927453163534563,"GOLGA2",1
GO:0010714,"GO:0010714","positive regulation of collagen metabolic process","1/473","16/11852",0.479025663730877,0.479025663730877,0.927453163534563,"F2R",1
GO:0015919,"GO:0015919","peroxisomal membrane transport","1/473","16/11852",0.479025663730877,0.479025663730877,0.927453163534563,"PEX1",1
GO:0016246,"GO:0016246","RNA interference","1/473","16/11852",0.479025663730877,0.479025663730877,0.927453163534563,"HENMT1",1
GO:0019883,"GO:0019883","antigen processing and presentation of endogenous antigen","1/473","16/11852",0.479025663730877,0.479025663730877,0.927453163534563,"TAP1",1
GO:0030033,"GO:0030033","microvillus assembly","1/473","16/11852",0.479025663730877,0.479025663730877,0.927453163534563,"TNIK",1
GO:0030194,"GO:0030194","positive regulation of blood coagulation","1/473","16/11852",0.479025663730877,0.479025663730877,0.927453163534563,"F2R",1
GO:0030859,"GO:0030859","polarized epithelial cell differentiation","1/473","16/11852",0.479025663730877,0.479025663730877,0.927453163534563,"RAB10",1
GO:0031958,"GO:0031958","corticosteroid receptor signaling pathway","1/473","16/11852",0.479025663730877,0.479025663730877,0.927453163534563,"ARNTL",1
GO:0032228,"GO:0032228","regulation of synaptic transmission, GABAergic","1/473","16/11852",0.479025663730877,0.479025663730877,0.927453163534563,"STXBP1",1
GO:0032232,"GO:0032232","negative regulation of actin filament bundle assembly","1/473","16/11852",0.479025663730877,0.479025663730877,0.927453163534563,"PHLDB2",1
GO:0032288,"GO:0032288","myelin assembly","1/473","16/11852",0.479025663730877,0.479025663730877,0.927453163534563,"ILK",1
GO:0033687,"GO:0033687","osteoblast proliferation","1/473","16/11852",0.479025663730877,0.479025663730877,0.927453163534563,"EIF2AK2",1
GO:0035269,"GO:0035269","protein O-linked mannosylation","1/473","16/11852",0.479025663730877,0.479025663730877,0.927453163534563,"B4GAT1",1
GO:0035372,"GO:0035372","protein localization to microtubule","1/473","16/11852",0.479025663730877,0.479025663730877,0.927453163534563,"ABHD17C",1
GO:0035902,"GO:0035902","response to immobilization stress","1/473","16/11852",0.479025663730877,0.479025663730877,0.927453163534563,"MDM2",1
GO:0036119,"GO:0036119","response to platelet-derived growth factor","1/473","16/11852",0.479025663730877,0.479025663730877,0.927453163534563,"FYN",1
GO:0043090,"GO:0043090","amino acid import","1/473","16/11852",0.479025663730877,0.479025663730877,0.927453163534563,"ARL6IP5",1
GO:0044321,"GO:0044321","response to leptin","1/473","16/11852",0.479025663730877,0.479025663730877,0.927453163534563,"BBS2",1
GO:0046337,"GO:0046337","phosphatidylethanolamine metabolic process","1/473","16/11852",0.479025663730877,0.479025663730877,0.927453163534563,"PNPLA8",1
GO:0046514,"GO:0046514","ceramide catabolic process","1/473","16/11852",0.479025663730877,0.479025663730877,0.927453163534563,"GM2A",1
GO:0048710,"GO:0048710","regulation of astrocyte differentiation","1/473","16/11852",0.479025663730877,0.479025663730877,0.927453163534563,"LDLR",1
GO:0051797,"GO:0051797","regulation of hair follicle development","1/473","16/11852",0.479025663730877,0.479025663730877,0.927453163534563,"SMAD4",1
GO:0051882,"GO:0051882","mitochondrial depolarization","1/473","16/11852",0.479025663730877,0.479025663730877,0.927453163534563,"MLLT11",1
GO:0051931,"GO:0051931","regulation of sensory perception","1/473","16/11852",0.479025663730877,0.479025663730877,0.927453163534563,"F2R",1
GO:0060396,"GO:0060396","growth hormone receptor signaling pathway","1/473","16/11852",0.479025663730877,0.479025663730877,0.927453163534563,"PTK2",1
GO:0060628,"GO:0060628","regulation of ER to Golgi vesicle-mediated transport","1/473","16/11852",0.479025663730877,0.479025663730877,0.927453163534563,"SORL1",1
GO:0061081,"GO:0061081","positive regulation of myeloid leukocyte cytokine production involved in immune response","1/473","16/11852",0.479025663730877,0.479025663730877,0.927453163534563,"MAVS",1
GO:0061437,"GO:0061437","renal system vasculature development","1/473","16/11852",0.479025663730877,0.479025663730877,0.927453163534563,"NRP1",1
GO:0061440,"GO:0061440","kidney vasculature development","1/473","16/11852",0.479025663730877,0.479025663730877,0.927453163534563,"NRP1",1
GO:0071378,"GO:0071378","cellular response to growth hormone stimulus","1/473","16/11852",0.479025663730877,0.479025663730877,0.927453163534563,"PTK2",1
GO:0071786,"GO:0071786","endoplasmic reticulum tubular network organization","1/473","16/11852",0.479025663730877,0.479025663730877,0.927453163534563,"RAB10",1
GO:1900048,"GO:1900048","positive regulation of hemostasis","1/473","16/11852",0.479025663730877,0.479025663730877,0.927453163534563,"F2R",1
GO:1901524,"GO:1901524","regulation of mitophagy","1/473","16/11852",0.479025663730877,0.479025663730877,0.927453163534563,"HDAC6",1
GO:1903319,"GO:1903319","positive regulation of protein maturation","1/473","16/11852",0.479025663730877,0.479025663730877,0.927453163534563,"SOX4",1
GO:1903830,"GO:1903830","magnesium ion transmembrane transport","1/473","16/11852",0.479025663730877,0.479025663730877,0.927453163534563,"NIPAL3",1
GO:1905144,"GO:1905144","response to acetylcholine","1/473","16/11852",0.479025663730877,0.479025663730877,0.927453163534563,"GNAQ",1
GO:1905145,"GO:1905145","cellular response to acetylcholine","1/473","16/11852",0.479025663730877,0.479025663730877,0.927453163534563,"GNAQ",1
GO:0042177,"GO:0042177","negative regulation of protein catabolic process","5/473","114/11852",0.479869807344307,0.479869807344307,0.927453163534563,"USP19/FYN/ERLEC1/GABARAPL2/PBK",5
GO:0071901,"GO:0071901","negative regulation of protein serine/threonine kinase activity","5/473","114/11852",0.479869807344307,0.479869807344307,0.927453163534563,"STK38/SORL1/PRKAR1A/CDKN2C/CDKN1B",5
GO:0001894,"GO:0001894","tissue homeostasis","6/473","139/11852",0.481596249248166,0.481596249248166,0.927453163534563,"F2R/PDK4/BBS2/BBS10/SNX10/DRAM2",6
GO:0007160,"GO:0007160","cell-matrix adhesion","7/473","164/11852",0.482861258876485,0.482861258876485,0.927453163534563,"ILK/PHLDB2/EPDR1/SORBS1/NRP1/PTK2/PLEKHA2",7
GO:0006635,"GO:0006635","fatty acid beta-oxidation","3/473","65/11852",0.483513078012425,0.483513078012425,0.927453163534563,"ACOX1/AUH/EHHADH",3
GO:0033047,"GO:0033047","regulation of mitotic sister chromatid segregation","3/473","65/11852",0.483513078012425,0.483513078012425,0.927453163534563,"TTK/BUB1/NDC80",3
GO:0033138,"GO:0033138","positive regulation of peptidyl-serine phosphorylation","3/473","65/11852",0.483513078012425,0.483513078012425,0.927453163534563,"HDAC6/TRIM6/CREBL2",3
GO:0044728,"GO:0044728","DNA methylation or demethylation","3/473","65/11852",0.483513078012425,0.483513078012425,0.927453163534563,"MBD2/ATF7IP/ZMPSTE24",3
GO:0045682,"GO:0045682","regulation of epidermis development","3/473","65/11852",0.483513078012425,0.483513078012425,0.927453163534563,"SMAD4/NCOA3/AQP3",3
GO:0045921,"GO:0045921","positive regulation of exocytosis","3/473","65/11852",0.483513078012425,0.483513078012425,0.927453163534563,"TSG101/STXBP1/PDCD6IP",3
GO:0050868,"GO:0050868","negative regulation of T cell activation","3/473","65/11852",0.483513078012425,0.483513078012425,0.927453163534563,"SOCS6/PDE5A/PRKAR1A",3
GO:0060419,"GO:0060419","heart growth","3/473","65/11852",0.483513078012425,0.483513078012425,0.927453163534563,"JARID2/TGFBR2/PRKAR1A",3
GO:1902036,"GO:1902036","regulation of hematopoietic stem cell differentiation","3/473","65/11852",0.483513078012425,0.483513078012425,0.927453163534563,"EIF2AK2/PSMD5/N4BP2L2",3
GO:0044843,"GO:0044843","cell cycle G1/S phase transition","10/473","239/11852",0.485228229499571,0.485228229499571,0.927453163534563,"KANK2/CDC25C/IQGAP3/CUL4B/KLF11/MDM2/SOX4/CDKN2C/RHOU/CDKN1B",10
GO:0014074,"GO:0014074","response to purine-containing compound","4/473","90/11852",0.486059219439216,0.486059219439216,0.927453163534563,"PIK3CG/TMEM38B/STAT1/RAP1B",4
GO:0033108,"GO:0033108","mitochondrial respiratory chain complex assembly","4/473","90/11852",0.486059219439216,0.486059219439216,0.927453163534563,"NDUFB6/COX20/NDUFC2/NUBPL",4
GO:0045598,"GO:0045598","regulation of fat cell differentiation","4/473","90/11852",0.486059219439216,0.486059219439216,0.927453163534563,"HDAC6/ZADH2/ARNTL/CREBL2",4
GO:0007015,"GO:0007015","actin filament organization","13/473","314/11852",0.486557151057903,0.486557151057903,0.927453163534563,"PHLDB2/SORBS1/RUFY3/CARMIL1/CIT/NRP1/RHOBTB1/GMFB/MTPN/RHOBTB3/MARCKS/RHOU/ARF6",13
GO:0016311,"GO:0016311","dephosphorylation","16/473","389/11852",0.487400511283573,0.487400511283573,0.927453163534563,"SGPP2/FKBP1A/CDC25B/CDC25C/RCAN3/DLG3/CDC14B/EIF2AK2/SYNJ2/PPP2R5A/HDHD2/PDP1/CALM2/PHOSPHO2/CALM1/PPP2R5C",16
GO:0021953,"GO:0021953","central nervous system neuron differentiation","5/473","115/11852",0.487565506592296,0.487565506592296,0.927453163534563,"NRP1/PTK2/MTPN/SOX4/SEMA3A",5
GO:0001755,"GO:0001755","neural crest cell migration","2/473","41/11852",0.491167558098152,0.491167558098152,0.927453163534563,"NRP1/SEMA3A",2
GO:0002532,"GO:0002532","production of molecular mediator involved in inflammatory response","2/473","41/11852",0.491167558098152,0.491167558098152,0.927453163534563,"ADCY7/SNAP23",2
GO:0006284,"GO:0006284","base-excision repair","2/473","41/11852",0.491167558098152,0.491167558098152,0.927453163534563,"FAM168A/XPA",2
GO:0010676,"GO:0010676","positive regulation of cellular carbohydrate metabolic process","2/473","41/11852",0.491167558098152,0.491167558098152,0.927453163534563,"SORBS1/EPM2AIP1",2
[truncated: 1,901 more rows]

## Sheet: GO_HM_clust_B6_2
,"ID","Description","GeneRatio","BgRatio","pvalue","p.adjust","qvalue","geneID","Count"
GO:0022613,"GO:0022613","ribonucleoprotein complex biogenesis","36/236","469/11852",2.46748272063205e-12,2.46748272063205e-12,6.61025634106165e-09,"SF1/BRIX1/TGS1/CHD7/NOLC1/PRPF3/CNOT1/NOP14/RPS24/SART1/NOL11/DDX27/RSL1D1/SRFBP1/NOM1/BMS1/RUVBL1/GEMIN5/GNL2/PA2G4/NOCT/NOB1/SF3A3/DDX24/EIF3A/RCL1/ISG20L2/MYBBP1A/NOL6/MDN1/UTP4/URB1/NAT10/PRMT5/UTP20/FTSJ3",36
GO:0042254,"GO:0042254","ribosome biogenesis","26/236","284/11852",7.76131479311076e-11,7.76131479311076e-11,7.38948800299139e-08,"BRIX1/CHD7/NOLC1/NOP14/RPS24/SART1/NOL11/DDX27/RSL1D1/SRFBP1/NOM1/BMS1/GNL2/PA2G4/NOB1/DDX24/RCL1/ISG20L2/MYBBP1A/NOL6/MDN1/UTP4/URB1/NAT10/UTP20/FTSJ3",26
GO:0016072,"GO:0016072","rRNA metabolic process","24/236","242/11852",8.27506515069763e-11,8.27506515069763e-11,7.38948800299139e-08,"CHD7/NOLC1/NOP14/RPS24/SART1/NOL11/DDX27/NCL/RSL1D1/SRFBP1/BMS1/PA2G4/NOB1/DDX24/IPPK/RCL1/ISG20L2/NOL6/MDN1/UTP4/URB1/NAT10/UTP20/FTSJ3",24
GO:0006364,"GO:0006364","rRNA processing","22/236","208/11852",1.51873995774434e-10,1.51873995774434e-10,1.01715610327877e-07,"CHD7/NOLC1/NOP14/RPS24/SART1/NOL11/DDX27/RSL1D1/SRFBP1/BMS1/PA2G4/NOB1/DDX24/RCL1/ISG20L2/NOL6/MDN1/UTP4/URB1/NAT10/UTP20/FTSJ3",22
GO:0034660,"GO:0034660","ncRNA metabolic process","33/236","496/11852",9.50765600053038e-10,9.50765600053038e-10,5.0941020044947e-07,"KHSRP/CCNK/TRMT6/CHD7/NOLC1/ELL/INTS7/NOP14/RPS24/SART1/NOL11/DDX27/NCL/RSL1D1/PUS7/SRFBP1/BMS1/PA2G4/NOB1/XPO5/NSUN2/DDX24/IPPK/RCL1/ISG20L2/NOL6/MDN1/UTP4/URB1/NAT10/UTP20/FTSJ3/ELAC2",33
GO:0034470,"GO:0034470","ncRNA processing","27/236","354/11852",1.98608941304919e-09,1.98608941304919e-09,8.86771501089508e-07,"TRMT6/CHD7/NOLC1/INTS7/NOP14/RPS24/SART1/NOL11/DDX27/RSL1D1/PUS7/SRFBP1/BMS1/PA2G4/NOB1/NSUN2/DDX24/RCL1/ISG20L2/NOL6/MDN1/UTP4/URB1/NAT10/UTP20/FTSJ3/ELAC2",27
GO:0042274,"GO:0042274","ribosomal small subunit biogenesis","11/236","64/11852",4.53961970479782e-08,4.53961970479782e-08,1.56312424828799e-05,"NOP14/RPS24/NOL11/SRFBP1/NOM1/BMS1/NOB1/RCL1/UTP4/NAT10/UTP20",11
GO:0046112,"GO:0046112","nucleobase biosynthetic process","7/236","19/11852",4.66787594773624e-08,4.66787594773624e-08,1.56312424828799e-05,"CAD/MTHFD1L/UMPS/CTPS1/DHODH/MTHFD1/GART",7
GO:0030490,"GO:0030490","maturation of SSU-rRNA","9/236","44/11852",1.63278031737626e-07,1.63278031737626e-07,4.86014726049426e-05,"NOP14/NOL11/SRFBP1/BMS1/NOB1/RCL1/UTP4/NAT10/UTP20",9
GO:0006397,"GO:0006397","mRNA processing","27/236","474/11852",8.3273481404146e-07,8.3273481404146e-07,0.000223085273866896,"KHSRP/SUPT6H/SF1/SYNCRIP/ZBTB7A/TGS1/YBX1/SAFB2/PCBP1/RBM28/SAFB/CCAR2/PRPF3/SYMPK/SART1/RBM25/PNN/GEMIN5/NOCT/SF3A3/SNRNP40/NUP98/RBM19/RNPS1/SRSF4/RBM38/PRMT5",27
GO:0008380,"GO:0008380","RNA splicing","24/236","418/11852",3.08292536799099e-06,3.08292536799099e-06,0.000696430197963172,"KHSRP/SUPT6H/SF1/SYNCRIP/ZBTB7A/TGS1/YBX1/PCBP1/RBM28/CCAR2/PRPF3/SYMPK/SART1/RBM25/PNN/GEMIN5/SF3A3/SNRNP40/NUP98/RBM19/RNPS1/SRSF4/RBM38/PRMT5",24
GO:0009112,"GO:0009112","nucleobase metabolic process","7/236","33/11852",3.11956945256588e-06,3.11956945256588e-06,0.000696430197963172,"CAD/MTHFD1L/UMPS/CTPS1/DHODH/MTHFD1/GART",7
GO:0006405,"GO:0006405","RNA export from nucleus","12/236","128/11852",9.07893380184351e-06,9.07893380184351e-06,0.00187092198588597,"SUPT6H/SMG7/NUP50/SYMPK/NUP160/XPO5/NUP98/NOL6/NUP153/NXF1/RNPS1/SRSF4",12
GO:1903311,"GO:1903311","regulation of mRNA metabolic process","18/236","282/11852",1.36184028848134e-05,1.36184028848134e-05,0.00255656891083162,"KHSRP/PSME4/SUPT6H/SYNCRIP/ZBTB7A/YBX1/SAFB2/SAFB/SAMD4A/CNOT1/RBM25/NOCT/APEX1/NUP98/RBM19/RNPS1/SRSF4/RBM38",18
GO:0000375,"GO:0000375","RNA splicing, via transesterification reactions","20/236","340/11852",1.49864681134784e-05,1.49864681134784e-05,0.00255656891083162,"KHSRP/SF1/SYNCRIP/ZBTB7A/TGS1/YBX1/PCBP1/PRPF3/SYMPK/SART1/RBM25/PNN/GEMIN5/SF3A3/SNRNP40/NUP98/RBM19/RNPS1/SRSF4/PRMT5",20
GO:0046132,"GO:0046132","pyrimidine ribonucleoside biosynthetic process","5/236","17/11852",1.52690952631201e-05,1.52690952631201e-05,0.00255656891083162,"CAD/UMPS/CTPS1/DHODH/NME1",5
GO:0034605,"GO:0034605","cellular response to heat","11/236","115/11852",1.78042244148616e-05,1.78042244148616e-05,0.00280568118488067,"MYOF/HSPA5/CCAR2/NUP50/DNAJC7/DNAJC2/NUP160/HSPA9/THBS1/NUP98/NUP153",11
GO:0009220,"GO:0009220","pyrimidine ribonucleotide biosynthetic process","5/236","18/11852",2.07999816839621e-05,2.07999816839621e-05,0.00309566978863647,"CAD/UMPS/CTPS1/DHODH/NME1",5
GO:0071426,"GO:0071426","ribonucleoprotein complex export from nucleus","11/236","120/11852",2.66169415026198e-05,2.66169415026198e-05,0.0037529150207295,"SUPT6H/SMG7/NUP50/SYMPK/NUP160/NUP98/NOL6/NUP153/NXF1/RNPS1/SRSF4",11
GO:0071166,"GO:0071166","ribonucleoprotein complex localization","11/236","121/11852",2.87723215173959e-05,2.87723215173959e-05,0.0038539767506196,"SUPT6H/SMG7/NUP50/SYMPK/NUP160/NUP98/NOL6/NUP153/NXF1/RNPS1/SRSF4",11
GO:0006611,"GO:0006611","protein export from nucleus","13/236","169/11852",3.27206499503637e-05,3.27206499503637e-05,0.004073207409351,"SUPT6H/SMG7/NUP50/SYMPK/NUP160/HSPA9/XPO5/NUP98/NOL6/NUP153/NXF1/RNPS1/SRSF4",13
GO:0009218,"GO:0009218","pyrimidine ribonucleotide metabolic process","5/236","20/11852",3.64315217938497e-05,3.64315217938497e-05,0.004073207409351,"CAD/UMPS/CTPS1/DHODH/NME1",5
GO:0051169,"GO:0051169","nuclear transport","18/236","305/11852",3.88112626859228e-05,3.88112626859228e-05,0.004073207409351,"SUPT6H/SMG7/NOLC1/NUP50/KPNB1/HMGA1/MED1/SYMPK/NUP160/GEMIN5/HSPA9/XPO5/NUP98/NOL6/NUP153/NXF1/RNPS1/SRSF4",18
GO:0006406,"GO:0006406","mRNA export from nucleus","10/236","104/11852",4.11026527110648e-05,4.11026527110648e-05,0.004073207409351,"SUPT6H/SMG7/NUP50/SYMPK/NUP160/NUP98/NUP153/NXF1/RNPS1/SRSF4",10
GO:0071427,"GO:0071427","mRNA-containing ribonucleoprotein complex export from nucleus","10/236","104/11852",4.11026527110648e-05,4.11026527110648e-05,0.004073207409351,"SUPT6H/SMG7/NUP50/SYMPK/NUP160/NUP98/NUP153/NXF1/RNPS1/SRSF4",10
GO:0050657,"GO:0050657","nucleic acid transport","13/236","173/11852",4.18092814288291e-05,4.18092814288291e-05,0.004073207409351,"KHSRP/SUPT6H/SMG7/NUP50/SYMPK/NUP160/XPO5/NUP98/NOL6/NUP153/NXF1/RNPS1/SRSF4",13
GO:0050658,"GO:0050658","RNA transport","13/236","173/11852",4.18092814288291e-05,4.18092814288291e-05,0.004073207409351,"KHSRP/SUPT6H/SMG7/NUP50/SYMPK/NUP160/XPO5/NUP98/NOL6/NUP153/NXF1/RNPS1/SRSF4",13
GO:0000377,"GO:0000377","RNA splicing, via transesterification reactions with bulged adenosine as nucleophile","19/236","337/11852",4.40930703841336e-05,4.40930703841336e-05,0.004073207409351,"SF1/SYNCRIP/ZBTB7A/TGS1/YBX1/PCBP1/PRPF3/SYMPK/SART1/RBM25/PNN/GEMIN5/SF3A3/SNRNP40/NUP98/RBM19/RNPS1/SRSF4/PRMT5",19
GO:0000398,"GO:0000398","mRNA splicing, via spliceosome","19/236","337/11852",4.40930703841336e-05,4.40930703841336e-05,0.004073207409351,"SF1/SYNCRIP/ZBTB7A/TGS1/YBX1/PCBP1/PRPF3/SYMPK/SART1/RBM25/PNN/GEMIN5/SF3A3/SNRNP40/NUP98/RBM19/RNPS1/SRSF4/PRMT5",19
GO:0051236,"GO:0051236","establishment of RNA localization","13/236","176/11852",5.00008690608584e-05,5.00008690608584e-05,0.00446498988631174,"KHSRP/SUPT6H/SMG7/NUP50/SYMPK/NUP160/XPO5/NUP98/NOL6/NUP153/NXF1/RNPS1/SRSF4",13
GO:0000466,"GO:0000466","maturation of 5.8S rRNA from tricistronic rRNA transcript (SSU-rRNA, 5.8S rRNA, LSU-rRNA)","5/236","22/11852",5.98980409970032e-05,5.98980409970032e-05,0.00517624836459671,"NOP14/RCL1/URB1/UTP20/FTSJ3",5
GO:0006403,"GO:0006403","RNA localization","14/236","208/11852",7.12424765313552e-05,7.12424765313552e-05,0.00596421390698352,"KHSRP/SUPT6H/SMG7/NUP50/SYMPK/NUP160/RUVBL1/XPO5/NUP98/NOL6/NUP153/NXF1/RNPS1/SRSF4",14
GO:0015931,"GO:0015931","nucleobase-containing compound transport","14/236","210/11852",7.89843683938265e-05,7.89843683938265e-05,0.00622657652650483,"EPG5/KHSRP/SUPT6H/SMG7/NUP50/SYMPK/NUP160/XPO5/NUP98/NOL6/NUP153/NXF1/RNPS1/SRSF4",14
GO:0051168,"GO:0051168","nuclear export","13/236","184/11852",7.90249201595701e-05,7.90249201595701e-05,0.00622657652650483,"SUPT6H/SMG7/NUP50/SYMPK/NUP160/HSPA9/XPO5/NUP98/NOL6/NUP153/NXF1/RNPS1/SRSF4",13
GO:0046131,"GO:0046131","pyrimidine ribonucleoside metabolic process","5/236","24/11852",9.35836768376067e-05,9.35836768376067e-05,0.00696404846642424,"CAD/UMPS/CTPS1/DHODH/NME1",5
GO:0046134,"GO:0046134","pyrimidine nucleoside biosynthetic process","5/236","24/11852",9.35836768376067e-05,9.35836768376067e-05,0.00696404846642424,"CAD/UMPS/CTPS1/DHODH/NME1",5
GO:0051028,"GO:0051028","mRNA transport","11/236","138/11852",9.63933456122565e-05,9.63933456122565e-05,0.0069792621503042,"KHSRP/SUPT6H/SMG7/NUP50/SYMPK/NUP160/NUP98/NUP153/NXF1/RNPS1/SRSF4",11
GO:0009408,"GO:0009408","response to heat","11/236","139/11852",0.000102870016982809,0.000102870016982809,0.00709333801809653,"MYOF/HSPA5/CCAR2/NUP50/DNAJC7/DNAJC2/NUP160/HSPA9/THBS1/NUP98/NUP153",11
GO:0034728,"GO:0034728","nucleosome organization","9/236","94/11852",0.000103264508279166,0.000103264508279166,0.00709333801809653,"PSME4/SUPT6H/BRD2/HMGA1/NASP/RUVBL1/CHAF1A/SUPT16H/CENPO",9
GO:0009156,"GO:0009156","ribonucleoside monophosphate biosynthetic process","11/236","140/11852",0.000109714698336649,0.000109714698336649,0.00734799755965188,"CAD/OGDH/ZBTB7A/PKM/NUP50/NUP160/UMPS/DHODH/NUP98/NUP153/GART",11
GO:0006913,"GO:0006913","nucleocytoplasmic transport","17/236","302/11852",0.000114105672019991,0.000114105672019991,0.00745568511658224,"SUPT6H/SMG7/NOLC1/NUP50/KPNB1/MED1/SYMPK/NUP160/GEMIN5/HSPA9/XPO5/NUP98/NOL6/NUP153/NXF1/RNPS1/SRSF4",17
GO:0006206,"GO:0006206","pyrimidine nucleobase metabolic process","4/236","14/11852",0.000131115612935058,0.000131115612935058,0.00836313871979256,"CAD/UMPS/CTPS1/DHODH",4
GO:0000460,"GO:0000460","maturation of 5.8S rRNA","5/236","26/11852",0.000140200985868007,0.000140200985868007,0.00873467586374731,"NOP14/RCL1/URB1/UTP20/FTSJ3",5
GO:0009201,"GO:0009201","ribonucleoside triphosphate biosynthetic process","10/236","122/11852",0.000158866432919576,0.000158866432919576,0.00967260937273494,"CAD/OGDH/ZBTB7A/PKM/NUP50/NUP160/CTPS1/NUP98/NUP153/NME1",10
GO:0009124,"GO:0009124","nucleoside monophosphate biosynthetic process","11/236","150/11852",0.000202411373136046,0.000202411373136046,0.0118094067225029,"CAD/OGDH/ZBTB7A/PKM/NUP50/NUP160/UMPS/DHODH/NUP98/NUP153/GART",11
GO:0006356,"GO:0006356","regulation of transcription by RNA polymerase I","5/236","28/11852",0.000202778417985609,0.000202778417985609,0.0118094067225029,"DHX33/MED1/NOL11/NCL/IPPK",5
GO:0032786,"GO:0032786","positive regulation of DNA-templated transcription, elongation","5/236","30/11852",0.000284643787350002,0.000284643787350002,0.015886369272056,"SUPT6H/CCNK/ELL/ERCC6/SUPT16H",5
GO:0042455,"GO:0042455","ribonucleoside biosynthetic process","5/236","30/11852",0.000284643787350002,0.000284643787350002,0.015886369272056,"CAD/UMPS/CTPS1/DHODH/NME1",5
GO:0034404,"GO:0034404","nucleobase-containing small molecule biosynthetic process","12/236","183/11852",0.000297892731885138,0.000297892731885138,0.0162865091868459,"CAD/OGDH/ZBTB7A/PKM/NUP50/NUP160/UMPS/CTPS1/DHODH/NUP98/NUP153/NME1",12
GO:0032784,"GO:0032784","regulation of DNA-templated transcription, elongation","6/236","47/11852",0.000317185439993251,0.000317185439993251,0.0168903300054787,"SUPT6H/CCNK/CCAR2/ELL/ERCC6/SUPT16H",6
GO:0009142,"GO:0009142","nucleoside triphosphate biosynthetic process","10/236","133/11852",0.000321546753935341,0.000321546753935341,0.0168903300054787,"CAD/OGDH/ZBTB7A/PKM/NUP50/NUP160/CTPS1/NUP98/NUP153/NME1",10
GO:0009260,"GO:0009260","ribonucleotide biosynthetic process","13/236","216/11852",0.000387248661794581,0.000387248661794581,0.0196829076794894,"CAD/OGDH/ZBTB7A/PKM/NUP50/NUP160/UMPS/CTPS1/DHODH/NUP98/NUP153/GART/NME1",13
GO:0033574,"GO:0033574","response to testosterone","5/236","32/11852",0.000389404480024476,0.000389404480024476,0.0196829076794894,"MSN/CAD/NASP/THBS1/NME1",5
GO:0000462,"GO:0000462","maturation of SSU-rRNA from tricistronic rRNA transcript (SSU-rRNA, 5.8S rRNA, LSU-rRNA)","5/236","33/11852",0.000451568858619205,0.000451568858619205,0.021602307240336,"NOP14/BMS1/RCL1/UTP4/UTP20",5
GO:0006409,"GO:0006409","tRNA export from nucleus","5/236","33/11852",0.000451568858619205,0.000451568858619205,0.021602307240336,"NUP50/NUP160/NUP98/NOL6/NUP153",5
GO:0071431,"GO:0071431","tRNA-containing ribonucleoprotein complex export from nucleus","5/236","33/11852",0.000451568858619205,0.000451568858619205,0.021602307240336,"NUP50/NUP160/NUP98/NOL6/NUP153",5
GO:0046390,"GO:0046390","ribose phosphate biosynthetic process","13/236","222/11852",0.000502908398595465,0.000502908398595465,0.0236362303679678,"CAD/OGDH/ZBTB7A/PKM/NUP50/NUP160/UMPS/CTPS1/DHODH/NUP98/NUP153/GART/NME1",13
GO:0007595,"GO:0007595","lactation","5/236","34/11852",0.000520925058986639,0.000520925058986639,0.0236530646765566,"CAD/MED1/UMPS/DHODH/NME1",5
GO:0051031,"GO:0051031","tRNA transport","5/236","34/11852",0.000520925058986639,0.000520925058986639,0.0236530646765566,"NUP50/NUP160/NUP98/NOL6/NUP153",5
GO:0050684,"GO:0050684","regulation of mRNA processing","9/236","119/11852",0.000611117948421818,0.000611117948421818,0.0272858803286584,"SUPT6H/ZBTB7A/SAFB2/SAFB/RBM25/NUP98/RBM19/RNPS1/SRSF4",9
GO:1900034,"GO:1900034","regulation of cellular response to heat","7/236","74/11852",0.000657590985542868,0.000657590985542868,0.0285166360311543,"CCAR2/NUP50/DNAJC7/DNAJC2/NUP160/NUP98/NUP153",7
GO:0006260,"GO:0006260","DNA replication","14/236","258/11852",0.000659972440956772,0.000659972440956772,0.0285166360311543,"LIG3/POLD3/SDE2/TOP1MT/HMGA1/NASP/DNAJC2/RBM14/CHAF1A/SUPT16H/ORC1/NUP98/CLSPN/SSRP1",14
GO:0045943,"GO:0045943","positive regulation of transcription by RNA polymerase I","4/236","21/11852",0.000702534004294144,0.000702534004294144,0.0298738352703191,"DHX33/NOL11/NCL/IPPK",4
GO:0006213,"GO:0006213","pyrimidine nucleoside metabolic process","5/236","37/11852",0.000777400919537468,0.000777400919537468,0.0315547901151971,"CAD/UMPS/CTPS1/DHODH/NME1",5
GO:0009163,"GO:0009163","nucleoside biosynthetic process","5/236","37/11852",0.000777400919537468,0.000777400919537468,0.0315547901151971,"CAD/UMPS/CTPS1/DHODH/NME1",5
GO:0097064,"GO:0097064","ncRNA export from nucleus","5/236","37/11852",0.000777400919537468,0.000777400919537468,0.0315547901151971,"NUP50/NUP160/NUP98/NOL6/NUP153",5
GO:0009396,"GO:0009396","folic acid-containing compound biosynthetic process","3/236","10/11852",0.000843472426253801,0.000843472426253801,0.0328136274696609,"MTHFD1L/MTHFD1/GART",3
GO:1901836,"GO:1901836","regulation of transcription of nucleolar large rRNA by RNA polymerase I","3/236","10/11852",0.000843472426253801,0.000843472426253801,0.0328136274696609,"NOL11/NCL/IPPK",3
GO:0000469,"GO:0000469","cleavage involved in rRNA processing","4/236","22/11852",0.000845341996137952,0.000845341996137952,0.0328136274696609,"NOP14/NOB1/RCL1/UTP20",4
GO:0071826,"GO:0071826","ribonucleoprotein complex subunit organization","14/236","265/11852",0.000857409126417467,0.000857409126417467,0.0328136274696609,"SF1/BRIX1/TGS1/MRRF/PRPF3/CNOT1/SART1/RUVBL1/GEMIN5/NOCT/SF3A3/EIF3A/MDN1/PRMT5",14
GO:0006360,"GO:0006360","transcription by RNA polymerase I","6/236","58/11852",0.000996715418769433,0.000996715418769433,0.03760772039686,"DHX33/MED1/ERCC6/NOL11/NCL/IPPK",6
GO:0006333,"GO:0006333","chromatin assembly or disassembly","8/236","103/11852",0.00102687909929941,0.00102687909929941,0.0382077091771491,"BRD2/HMGA1/BAZ1B/NASP/RUVBL1/CHAF1A/SUPT16H/CENPO",8
GO:0009266,"GO:0009266","response to temperature stimulus","11/236","183/11852",0.00108982094739697,0.00108982094739697,0.0389796844908976,"MYOF/HSPA5/CCAR2/NUP50/DNAJC7/DNAJC2/NUP160/HSPA9/THBS1/NUP98/NUP153",11
GO:0007589,"GO:0007589","body fluid secretion","6/236","59/11852",0.00109138547602759,0.00109138547602759,0.0389796844908976,"WNK1/CAD/MED1/UMPS/DHODH/NME1",6
GO:0006221,"GO:0006221","pyrimidine nucleotide biosynthetic process","5/236","40/11852",0.00111802679793846,0.00111802679793846,0.0389796844908976,"CAD/UMPS/CTPS1/DHODH/NME1",5
GO:0000478,"GO:0000478","endonucleolytic cleavage involved in rRNA processing","3/236","11/11852",0.00114278287769984,0.00114278287769984,0.0389796844908976,"NOP14/RCL1/UTP20",3
GO:0000479,"GO:0000479","endonucleolytic cleavage of tricistronic rRNA transcript (SSU-rRNA, 5.8S rRNA, LSU-rRNA)","3/236","11/11852",0.00114278287769984,0.00114278287769984,0.0389796844908976,"NOP14/RCL1/UTP20",3
GO:0009113,"GO:0009113","purine nucleobase biosynthetic process","3/236","11/11852",0.00114278287769984,0.00114278287769984,0.0389796844908976,"MTHFD1L/MTHFD1/GART",3
GO:0090501,"GO:0090501","RNA phosphodiester bond hydrolysis","9/236","130/11852",0.00115216167681245,0.00115216167681245,0.0389796844908976,"CNOT1/NOP14/NOCT/NOB1/RCL1/APEX1/ISG20L2/UTP20/ELAC2",9
GO:0006165,"GO:0006165","nucleoside diphosphate phosphorylation","8/236","105/11852",0.00116402987084802,0.00116402987084802,0.0389796844908976,"OGDH/ZBTB7A/PKM/NUP50/NUP160/NUP98/NUP153/NME1",8
GO:0006284,"GO:0006284","base-excision repair","5/236","41/11852",0.00125292995188706,0.00125292995188706,0.0409333341149239,"HUWE1/LIG3/HMGA1/ERCC6/APEX1",5
GO:1901659,"GO:1901659","glycosyl compound biosynthetic process","5/236","41/11852",0.00125292995188706,0.00125292995188706,0.0409333341149239,"CAD/UMPS/CTPS1/DHODH/NME1",5
GO:0046939,"GO:0046939","nucleotide phosphorylation","8/236","107/11852",0.00131541942875785,0.00131541942875785,0.0424571014101296,"OGDH/ZBTB7A/PKM/NUP50/NUP160/NUP98/NUP153/NME1",8
GO:1903312,"GO:1903312","negative regulation of mRNA metabolic process","6/236","62/11852",0.00141714546085067,0.00141714546085067,0.0451959297978064,"SYNCRIP/YBX1/NOCT/RNPS1/SRSF4/RBM38",6
GO:0009209,"GO:0009209","pyrimidine ribonucleoside triphosphate biosynthetic process","3/236","12/11852",0.00150140830276945,0.00150140830276945,0.0473199273132909,"CAD/CTPS1/NME1",3
GO:0009165,"GO:0009165","nucleotide biosynthetic process","14/236","283/11852",0.00160560608380011,0.00160560608380011,0.0497420002869465,"CAD/OGDH/ZBTB7A/PKM/NUP50/NUP160/UMPS/CTPS1/DHODH/MTHFD1/NUP98/NUP153/GART/NME1",14
GO:0022618,"GO:0022618","ribonucleoprotein complex assembly","13/236","252/11852",0.00161539344743266,0.00161539344743266,0.0497420002869465,"SF1/BRIX1/TGS1/PRPF3/CNOT1/SART1/RUVBL1/GEMIN5/NOCT/SF3A3/EIF3A/MDN1/PRMT5",13
GO:0090502,"GO:0090502","RNA phosphodiester bond hydrolysis, endonucleolytic","6/236","65/11852",0.00181227770282484,0.00181227770282484,0.0551005618483353,"NOP14/NOB1/RCL1/APEX1/UTP20/ELAC2",6
GO:1901293,"GO:1901293","nucleoside phosphate biosynthetic process","14/236","287/11852",0.00183055108223055,0.00183055108223055,0.0551005618483353,"CAD/OGDH/ZBTB7A/PKM/NUP50/NUP160/UMPS/CTPS1/DHODH/MTHFD1/NUP98/NUP153/GART/NME1",14
GO:0006997,"GO:0006997","nucleus organization","8/236","113/11852",0.0018655235931187,0.0018655235931187,0.0555293280056969,"PSME4/SF1/NDEL1/NOLC1/ETS1/CHMP4B/NUP98/NUP153",8
GO:0009208,"GO:0009208","pyrimidine ribonucleoside triphosphate metabolic process","3/236","13/11852",0.00192328992190284,0.00192328992190284,0.0566196975273884,"CAD/CTPS1/NME1",3
GO:0006096,"GO:0006096","glycolytic process","7/236","89/11852",0.00195803558324147,0.00195803558324147,0.0570160247065164,"OGDH/ZBTB7A/PKM/NUP50/NUP160/NUP98/NUP153",7
GO:0071103,"GO:0071103","DNA conformation change","12/236","228/11852",0.00204946988931329,0.00204946988931329,0.0590367953401509,"PSME4/BRD2/CHD7/RAD54L/TOP1MT/HMGA1/ERCC6/NASP/RUVBL1/CHAF1A/SUPV3L1/CENPO",12
GO:0006757,"GO:0006757","ATP generation from ADP","7/236","90/11852",0.00208795678469133,0.00208795678469133,0.0595055992949544,"OGDH/ZBTB7A/PKM/NUP50/NUP160/NUP98/NUP153",7
GO:0009206,"GO:0009206","purine ribonucleoside triphosphate biosynthetic process","8/236","116/11852",0.00220139911029515,0.00220139911029515,0.0620747795417193,"OGDH/ZBTB7A/PKM/NUP50/NUP160/NUP98/NUP153/NME1",8
GO:0042866,"GO:0042866","pyruvate biosynthetic process","7/236","91/11852",0.00222444789556181,0.00222444789556181,0.0620747795417193,"OGDH/ZBTB7A/PKM/NUP50/NUP160/NUP98/NUP153",7
GO:0009145,"GO:0009145","purine nucleoside triphosphate biosynthetic process","8/236","117/11852",0.00232333512681199,0.00232333512681199,0.0641659023085894,"OGDH/ZBTB7A/PKM/NUP50/NUP160/NUP98/NUP153/NME1",8
GO:0009130,"GO:0009130","pyrimidine nucleoside monophosphate biosynthetic process","3/236","14/11852",0.0024120647334395,0.0024120647334395,0.065270651213222,"CAD/UMPS/DHODH",3
GO:0042790,"GO:0042790","nucleolar large rRNA transcription by RNA polymerase I","3/236","14/11852",0.0024120647334395,0.0024120647334395,0.065270651213222,"NOL11/NCL/IPPK",3
GO:0048255,"GO:0048255","mRNA stabilization","4/236","30/11852",0.0027959344694712,0.0027959344694712,0.0740372440127397,"SYNCRIP/YBX1/NOCT/RBM38",4
GO:0072528,"GO:0072528","pyrimidine-containing compound biosynthetic process","5/236","49/11852",0.00280288359571962,0.00280288359571962,0.0740372440127397,"CAD/UMPS/CTPS1/DHODH/NME1",5
GO:0006338,"GO:0006338","chromatin remodeling","9/236","148/11852",0.00281894261093693,0.00281894261093693,0.0740372440127397,"PSME4/SUPT6H/ZBTB7A/CHD7/HMGA1/BAZ1B/NASP/RUVBL1/CENPO",9
GO:0009129,"GO:0009129","pyrimidine nucleoside monophosphate metabolic process","3/236","15/11852",0.00297107838742359,0.00297107838742359,0.076532332955395,"CAD/UMPS/DHODH",3
GO:0042559,"GO:0042559","pteridine-containing compound biosynthetic process","3/236","15/11852",0.00297107838742359,0.00297107838742359,0.076532332955395,"MTHFD1L/MTHFD1/GART",3
GO:0046031,"GO:0046031","ADP metabolic process","7/236","99/11852",0.00357976032221271,0.00357976032221271,0.0910689866521611,"OGDH/ZBTB7A/PKM/NUP50/NUP160/NUP98/NUP153",7
GO:0009148,"GO:0009148","pyrimidine nucleoside triphosphate biosynthetic process","3/236","16/11852",0.0036033976250973,0.0036033976250973,0.0910689866521611,"CAD/CTPS1/NME1",3
GO:0009132,"GO:0009132","nucleoside diphosphate metabolic process","8/236","126/11852",0.00367533137477363,0.00367533137477363,0.092018872098366,"OGDH/ZBTB7A/PKM/NUP50/NUP160/NUP98/NUP153/NME1",8
GO:0000387,"GO:0000387","spliceosomal snRNP assembly","5/236","53/11852",0.00395576252011676,0.00395576252011676,0.098122959197828,"TGS1/PRPF3/SART1/GEMIN5/PRMT5",5
GO:0009127,"GO:0009127","purine nucleoside monophosphate biosynthetic process","8/236","128/11852",0.0040450759329471,0.0040450759329471,0.098514050233018,"OGDH/ZBTB7A/PKM/NUP50/NUP160/NUP98/NUP153/GART",8
GO:0009168,"GO:0009168","purine ribonucleoside monophosphate biosynthetic process","8/236","128/11852",0.0040450759329471,0.0040450759329471,0.098514050233018,"OGDH/ZBTB7A/PKM/NUP50/NUP160/NUP98/NUP153/GART",8
GO:0000381,"GO:0000381","regulation of alternative mRNA splicing, via spliceosome","5/236","54/11852",0.00429007985226442,0.00429007985226442,0.102222522085759,"ZBTB7A/RBM25/RBM19/RNPS1/SRSF4",5
GO:0075733,"GO:0075733","intracellular transport of virus","5/236","54/11852",0.00429007985226442,0.00429007985226442,0.102222522085759,"NUP50/KPNB1/NUP160/NUP98/NUP153",5
GO:0032968,"GO:0032968","positive regulation of transcription elongation from RNA polymerase II promoter","3/236","17/11852",0.0043118222970162,0.0043118222970162,0.102222522085759,"SUPT6H/ELL/SUPT16H",3
GO:0043489,"GO:0043489","RNA stabilization","4/236","34/11852",0.00444670522915239,0.00444670522915239,0.104495519927912,"SYNCRIP/YBX1/NOCT/RBM38",4
GO:0006220,"GO:0006220","pyrimidine nucleotide metabolic process","5/236","55/11852",0.00464407311107338,0.00464407311107338,0.108184586431869,"CAD/UMPS/CTPS1/DHODH/NME1",5
GO:0006354,"GO:0006354","DNA-templated transcription, elongation","7/236","105/11852",0.00495237646833919,0.00495237646833919,0.114372033683514,"SUPT6H/CCNK/CCAR2/ELL/ERCC6/SUPT16H/SSRP1",7
GO:0046653,"GO:0046653","tetrahydrofolate metabolic process","3/236","18/11852",0.00509889697236476,0.00509889697236476,0.115759971406497,"MTHFD1L/MTHFD1/GART",3
GO:0090140,"GO:0090140","regulation of mitochondrial fission","3/236","18/11852",0.00509889697236476,0.00509889697236476,0.115759971406497,"MIEF1/DHODH/INF2",3
GO:0046794,"GO:0046794","transport of virus","5/236","57/11852",0.00541353499863536,0.00541353499863536,0.119263571254983,"NUP50/KPNB1/NUP160/NUP98/NUP153",5
GO:0031497,"GO:0031497","chromatin assembly","6/236","81/11852",0.005475523183164,0.005475523183164,0.119263571254983,"BRD2/HMGA1/NASP/RUVBL1/CHAF1A/CENPO",6
GO:0072527,"GO:0072527","pyrimidine-containing compound metabolic process","6/236","81/11852",0.005475523183164,0.005475523183164,0.119263571254983,"CAD/THTPA/UMPS/CTPS1/DHODH/NME1",6
GO:0006458,"GO:0006458","'de novo' protein folding","4/236","36/11852",0.00547581465663841,0.00547581465663841,0.119263571254983,"HSPA5/DNAJC7/DNAJC2/HSPA9",4
GO:1902373,"GO:1902373","negative regulation of mRNA catabolic process","4/236","36/11852",0.00547581465663841,0.00547581465663841,0.119263571254983,"SYNCRIP/YBX1/NOCT/RBM38",4
GO:0006754,"GO:0006754","ATP biosynthetic process","7/236","108/11852",0.00577153894726327,0.00577153894726327,0.12356970807999,"OGDH/ZBTB7A/PKM/NUP50/NUP160/NUP98/NUP153",7
GO:0072522,"GO:0072522","purine-containing compound biosynthetic process","11/236","227/11852",0.00579041202973475,0.00579041202973475,0.12356970807999,"OGDH/ZBTB7A/PKM/NUP50/NUP160/MTHFD1L/MTHFD1/NUP98/NUP153/GART/NME1",11
GO:0048024,"GO:0048024","regulation of mRNA splicing, via spliceosome","6/236","82/11852",0.00581190336234766,0.00581190336234766,0.12356970807999,"ZBTB7A/RBM25/NUP98/RBM19/RNPS1/SRSF4",6
GO:0009147,"GO:0009147","pyrimidine nucleoside triphosphate metabolic process","3/236","19/11852",0.00596692215170466,0.00596692215170466,0.12556719271444,"CAD/CTPS1/NME1",3
GO:0019359,"GO:0019359","nicotinamide nucleotide biosynthetic process","7/236","109/11852",0.0060659136018242,0.0060659136018242,0.12556719271444,"OGDH/ZBTB7A/PKM/NUP50/NUP160/NUP98/NUP153",7
GO:0019363,"GO:0019363","pyridine nucleotide biosynthetic process","7/236","109/11852",0.0060659136018242,0.0060659136018242,0.12556719271444,"OGDH/ZBTB7A/PKM/NUP50/NUP160/NUP98/NUP153",7
GO:0016197,"GO:0016197","endosomal transport","10/236","197/11852",0.00609333921423705,0.00609333921423705,0.12556719271444,"EPG5/CORO1C/ANKFY1/UBE2O/TRIM27/BET1L/CHMP4B/ANKRD27/EHD4/CCDC93",10
GO:0009135,"GO:0009135","purine nucleoside diphosphate metabolic process","7/236","110/11852",0.00637136129693113,0.00637136129693113,0.129307133179344,"OGDH/ZBTB7A/PKM/NUP50/NUP160/NUP98/NUP153",7
GO:0009179,"GO:0009179","purine ribonucleoside diphosphate metabolic process","7/236","110/11852",0.00637136129693113,0.00637136129693113,0.129307133179344,"OGDH/ZBTB7A/PKM/NUP50/NUP160/NUP98/NUP153",7
GO:0006144,"GO:0006144","purine nucleobase metabolic process","3/236","20/11852",0.00691796509505112,0.00691796509505112,0.139235191938537,"MTHFD1L/MTHFD1/GART",3
GO:0009185,"GO:0009185","ribonucleoside diphosphate metabolic process","7/236","112/11852",0.0070164689061365,0.0070164689061365,0.139235191938537,"OGDH/ZBTB7A/PKM/NUP50/NUP160/NUP98/NUP153",7
GO:0072525,"GO:0072525","pyridine-containing compound biosynthetic process","7/236","112/11852",0.0070164689061365,0.0070164689061365,0.139235191938537,"OGDH/ZBTB7A/PKM/NUP50/NUP160/NUP98/NUP153",7
GO:0034724,"GO:0034724","DNA replication-independent nucleosome organization","4/236","39/11852",0.00729961494016595,0.00729961494016595,0.143788854665034,"NASP/RUVBL1/SUPT16H/CENPO",4
GO:0043484,"GO:0043484","regulation of RNA splicing","7/236","114/11852",0.00770884890633148,0.00770884890633148,0.149939911227295,"ZBTB7A/RBM25/NUP98/RBM19/RNPS1/SRSF4/RBM38",7
GO:0006110,"GO:0006110","regulation of glycolytic process","5/236","62/11852",0.00772382018149247,0.00772382018149247,0.149939911227295,"ZBTB7A/NUP50/NUP160/NUP98/NUP153",5
GO:0000470,"GO:0000470","maturation of LSU-rRNA","3/236","21/11852",0.00795387027684396,0.00795387027684396,0.153294962927436,"RSL1D1/URB1/FTSJ3",3
GO:0006323,"GO:0006323","DNA packaging","7/236","115/11852",0.00807338671730963,0.00807338671730963,0.154486986432729,"PSME4/BRD2/HMGA1/NASP/RUVBL1/CHAF1A/CENPO",7
GO:0030811,"GO:0030811","regulation of nucleotide catabolic process","5/236","63/11852",0.00825684680469664,0.00825684680469664,0.156877007226226,"ZBTB7A/NUP50/NUP160/NUP98/NUP153",5
GO:0061013,"GO:0061013","regulation of mRNA catabolic process","9/236","175/11852",0.00836666867976698,0.00836666867976698,0.157844120014877,"KHSRP/PSME4/SYNCRIP/YBX1/SAMD4A/CNOT1/NOCT/APEX1/RBM38",9
GO:0019058,"GO:0019058","viral life cycle","12/236","273/11852",0.00857238010714718,0.00857238010714718,0.160594091812216,"CCNK/SCARB1/PCBP1/TRIM27/ILF3/NUP50/KPNB1/CHMP4B/IFITM2/NUP160/NUP98/NUP153",12
GO:0043486,"GO:0043486","histone exchange","4/236","41/11852",0.0087144070525064,0.0087144070525064,0.162121096115707,"PSME4/NASP/RUVBL1/CENPO",4
GO:0006334,"GO:0006334","nucleosome assembly","5/236","64/11852",0.00881485832044838,0.00881485832044838,0.16285890690048,"BRD2/NASP/RUVBL1/CHAF1A/CENPO",5
GO:0014074,"GO:0014074","response to purine-containing compound","6/236","90/11852",0.00906799350668497,0.00906799350668497,0.166388200969814,"CAD/HSPA5/DHODH/APEX1/FOSL1/NME1",6
GO:0000380,"GO:0000380","alternative mRNA splicing, via spliceosome","5/236","65/11852",0.00939840670525033,0.00939840670525033,0.171277802111436,"ZBTB7A/RBM25/RBM19/RNPS1/SRSF4",5
GO:1902369,"GO:1902369","negative regulation of RNA catabolic process","4/236","42/11852",0.00948439794723942,0.00948439794723942,0.171677046769021,"SYNCRIP/YBX1/NOCT/RBM38",4
GO:0006090,"GO:0006090","pyruvate metabolic process","7/236","120/11852",0.0100894443440619,0.0100894443440619,0.180193935829036,"OGDH/ZBTB7A/PKM/NUP50/NUP160/NUP98/NUP153",7
GO:0007565,"GO:0007565","female pregnancy","7/236","120/11852",0.0100894443440619,0.0100894443440619,0.180193935829036,"CAD/EPN1/ETS1/MED1/UMPS/DHODH/FOSL1",7
GO:0042398,"GO:0042398","cellular modified amino acid biosynthetic process","4/236","43/11852",0.0102973293880592,0.0102973293880592,0.181670757021943,"CHDH/MTHFD1L/MTHFD1/GART",4
GO:0031503,"GO:0031503","protein-containing complex localization","11/236","246/11852",0.0103077631881998,0.0103077631881998,0.181670757021943,"SUPT6H/SMG7/NUP50/SYMPK/NUP160/NUP98/NOL6/NUP153/NXF1/RNPS1/SRSF4",11
GO:0042273,"GO:0042273","ribosomal large subunit biogenesis","5/236","67/11852",0.010644273504044,0.010644273504044,0.186375480342566,"BRIX1/RSL1D1/MDN1/URB1/FTSJ3",5
GO:0006164,"GO:0006164","purine nucleotide biosynthetic process","10/236","215/11852",0.0109537340562654,0.0109537340562654,0.190548552106599,"OGDH/ZBTB7A/PKM/NUP50/NUP160/MTHFD1/NUP98/NUP153/GART/NME1",10
GO:0043009,"GO:0043009","chordate embryonic development","18/236","500/11852",0.0111418654830471,0.0111418654830471,0.192570782032971,"SUPT6H/MYH9/EPN1/IRX5/NDEL1/DVL3/HM13/CHD7/NOLC1/ELL/MED1/NASP/XRCC2/MTHFD1L/SEMA3C/NSUN2/MTHFD1/FOSL1",18
GO:0009108,"GO:0009108","coenzyme biosynthetic process","10/236","216/11852",0.0112912148642473,0.0112912148642473,0.193901091967,"OGDH/ZBTB7A/PKM/NUP50/NUP160/MTHFD1L/MTHFD1/NUP98/NUP153/GART",10
GO:0006417,"GO:0006417","regulation of translation","13/236","320/11852",0.0118263036935189,0.0118263036935189,0.201796465973889,"KHSRP/SYNCRIP/SAMD4A/ILF3/NOLC1/CNOT1/PPP1R15A/NCL/PUS7/GEMIN5/PA2G4/THBS1/NAT10",13
GO:0043470,"GO:0043470","regulation of carbohydrate catabolic process","5/236","70/11852",0.0127178223129115,0.0127178223129115,0.21110397743328,"ZBTB7A/NUP50/NUP160/NUP98/NUP153",5
GO:0044766,"GO:0044766","multi-organism transport","5/236","70/11852",0.0127178223129115,0.0127178223129115,0.21110397743328,"NUP50/KPNB1/NUP160/NUP98/NUP153",5
GO:1902579,"GO:1902579","multi-organism localization","5/236","70/11852",0.0127178223129115,0.0127178223129115,0.21110397743328,"NUP50/KPNB1/NUP160/NUP98/NUP153",5
GO:0016052,"GO:0016052","carbohydrate catabolic process","8/236","156/11852",0.012809904460194,0.012809904460194,0.21110397743328,"OGDH/ZBTB7A/PKM/NUP50/SORD/NUP160/NUP98/NUP153",8
GO:0043488,"GO:0043488","regulation of mRNA stability","8/236","156/11852",0.012809904460194,0.012809904460194,0.21110397743328,"KHSRP/PSME4/SYNCRIP/YBX1/SAMD4A/NOCT/APEX1/RBM38",8
GO:0010762,"GO:0010762","regulation of fibroblast migration","3/236","25/11852",0.0129757608554018,0.0129757608554018,0.21110397743328,"ARHGEF7/CORO1C/THBS1",3
GO:0003208,"GO:0003208","cardiac ventricle morphogenesis","4/236","46/11852",0.0130021801425016,0.0130021801425016,0.21110397743328,"CHD7/PKP2/MED1/SEMA3C",4
GO:0046148,"GO:0046148","pigment biosynthetic process","4/236","46/11852",0.0130021801425016,0.0130021801425016,0.21110397743328,"MTHFD1L/SLC25A38/MTHFD1/GART",4
GO:0090305,"GO:0090305","nucleic acid phosphodiester bond hydrolysis","11/236","255/11852",0.0132212319626851,0.0132212319626851,0.213367376950117,"POLD3/CNOT1/KPNB1/NOP14/NOCT/NOB1/RCL1/APEX1/ISG20L2/UTP20/ELAC2",11
GO:0016925,"GO:0016925","protein sumoylation","5/236","71/11852",0.0134656131100035,0.0134656131100035,0.216009992845629,"UBE2I/NUP50/NUP160/NUP98/NUP153",5
GO:0030520,"GO:0030520","intracellular estrogen receptor signaling pathway","4/236","47/11852",0.0139950927472977,0.0139950927472977,0.222631938820433,"SAFB/CNOT1/MED1/RBM14",4
GO:0017148,"GO:0017148","negative regulation of translation","7/236","128/11852",0.0140446199519137,0.0140446199519137,0.222631938820433,"KHSRP/SYNCRIP/SAMD4A/ILF3/CNOT1/NCL/PUS7",7
GO:0006760,"GO:0006760","folic acid-containing compound metabolic process","3/236","26/11852",0.0144565340124875,0.0144565340124875,0.226481249995572,"MTHFD1L/MTHFD1/GART",3
GO:0010765,"GO:0010765","positive regulation of sodium ion transport","3/236","26/11852",0.0144565340124875,0.0144565340124875,0.226481249995572,"WNK1/PKP2/CNKSR3",3
GO:0098781,"GO:0098781","ncRNA transcription","6/236","100/11852",0.0147537457816769,0.0147537457816769,0.22963161801898,"CCNK/ELL/INTS7/NOL11/NCL/IPPK",6
GO:0045815,"GO:0045815","positive regulation of gene expression, epigenetic","4/236","48/11852",0.0150348600763173,0.0150348600763173,0.22963161801898,"HMGA1/BAZ1B/ERCC6/MYBBP1A",4
GO:0071824,"GO:0071824","protein-DNA complex subunit organization","9/236","193/11852",0.0151892064799732,0.0151892064799732,0.22963161801898,"PSME4/SUPT6H/BRD2/HMGA1/NASP/RUVBL1/CHAF1A/SUPT16H/CENPO",9
GO:0043487,"GO:0043487","regulation of RNA stability","8/236","161/11852",0.0152518638727489,0.0152518638727489,0.22963161801898,"KHSRP/PSME4/SYNCRIP/YBX1/SAMD4A/NOCT/APEX1/RBM38",8
GO:0034101,"GO:0034101","erythrocyte homeostasis","6/236","101/11852",0.0154329164088536,0.0154329164088536,0.22963161801898,"ZBTB7A/ETS1/RPS24/MED1/HSPA9/SLC25A38",6
GO:2001169,"GO:2001169","regulation of ATP biosynthetic process","5/236","74/11852",0.0158854616331041,0.0158854616331041,0.22963161801898,"ZBTB7A/NUP50/NUP160/NUP98/NUP153",5
GO:0006620,"GO:0006620","posttranslational protein targeting to endoplasmic reticulum membrane","2/236","10/11852",0.0159906278366129,0.0159906278366129,0.22963161801898,"HSPA5/CHMP4B",2
GO:0010763,"GO:0010763","positive regulation of fibroblast migration","2/236","10/11852",0.0159906278366129,0.0159906278366129,0.22963161801898,"ARHGEF7/THBS1",2
GO:0031000,"GO:0031000","response to caffeine","2/236","10/11852",0.0159906278366129,0.0159906278366129,0.22963161801898,"CAD/DHODH",2
GO:0033314,"GO:0033314","mitotic DNA replication checkpoint","2/236","10/11852",0.0159906278366129,0.0159906278366129,0.22963161801898,"ORC1/CLSPN",2
GO:0036270,"GO:0036270","response to diuretic","2/236","10/11852",0.0159906278366129,0.0159906278366129,0.22963161801898,"CAD/DHODH",2
GO:0090148,"GO:0090148","membrane fission","2/236","10/11852",0.0159906278366129,0.0159906278366129,0.22963161801898,"CORO1C/CHMP4B",2
GO:1902043,"GO:1902043","positive regulation of extrinsic apoptotic signaling pathway via death domain receptors","2/236","10/11852",0.0159906278366129,0.0159906278366129,0.22963161801898,"PEA15/THBS1",2
GO:1903897,"GO:1903897","regulation of PERK-mediated unfolded protein response","2/236","10/11852",0.0159906278366129,0.0159906278366129,0.22963161801898,"HSPA5/PPP1R15A",2
GO:0000266,"GO:0000266","mitochondrial fission","3/236","27/11852",0.0160290989945272,0.0160290989945272,0.22963161801898,"MIEF1/DHODH/INF2",3
GO:0051085,"GO:0051085","chaperone cofactor-dependent protein refolding","3/236","27/11852",0.0160290989945272,0.0160290989945272,0.22963161801898,"HSPA5/DNAJC7/HSPA9",3
GO:0060968,"GO:0060968","regulation of gene silencing","6/236","102/11852",0.0161334748758333,0.0161334748758333,0.229897500330324,"NUP50/HMGA1/NUP160/XPO5/NUP98/NUP153",6
GO:0006402,"GO:0006402","mRNA catabolic process","13/236","334/11852",0.0163648486108589,0.0163648486108589,0.23196067788714,"KHSRP/PSME4/SMG7/SYNCRIP/YBX1/SAMD4A/CNOT1/RPS24/NOCT/APEX1/RNPS1/SUPV3L1/RBM38",13
GO:0051196,"GO:0051196","regulation of coenzyme metabolic process","5/236","76/11852",0.0176502229225191,0.0176502229225191,0.248863253949092,"ZBTB7A/NUP50/NUP160/NUP98/NUP153",5
GO:0044706,"GO:0044706","multi-multicellular organism process","7/236","135/11852",0.0183244498760578,0.0183244498760578,0.255678316527231,"CAD/EPN1/ETS1/MED1/UMPS/DHODH/FOSL1",7
GO:1901654,"GO:1901654","response to ketone","7/236","135/11852",0.0183244498760578,0.0183244498760578,0.255678316527231,"MSN/CAD/NASP/TNC/THBS1/FOSL1/NME1",7
GO:0051188,"GO:0051188","cofactor biosynthetic process","11/236","269/11852",0.0189445216508486,0.0189445216508486,0.258386468677477,"OGDH/ZBTB7A/PKM/NUP50/NUP160/MTHFD1L/SLC25A38/MTHFD1/NUP98/NUP153/GART",11
GO:0051170,"GO:0051170","import into nucleus","7/236","136/11852",0.0190030607311659,0.0190030607311659,0.258386468677477,"NOLC1/NUP50/KPNB1/MED1/GEMIN5/NUP98/NUP153",7
GO:0006281,"GO:0006281","DNA repair","17/236","491/11852",0.0190120922101881,0.0190120922101881,0.258386468677477,"HUWE1/PSME4/USP10/LIG3/POLD3/ZBTB7A/RAD54L/HMGA1/ERCC6/XRCC2/RBM14/RUVBL1/CHAF1A/SUPT16H/APEX1/CLSPN/SSRP1",17
GO:0001701,"GO:0001701","in utero embryonic development","12/236","305/11852",0.0191639846501453,0.0191639846501453,0.258386468677477,"SUPT6H/MYH9/EPN1/NDEL1/HM13/CHD7/ELL/MED1/NASP/XRCC2/NSUN2/FOSL1",12
GO:0006241,"GO:0006241","CTP biosynthetic process","2/236","11/11852",0.0192901489385936,0.0192901489385936,0.258386468677477,"CTPS1/NME1",2
GO:0043650,"GO:0043650","dicarboxylic acid biosynthetic process","2/236","11/11852",0.0192901489385936,0.0192901489385936,0.258386468677477,"MTHFD1L/MTHFD1",2
GO:0046036,"GO:0046036","CTP metabolic process","2/236","11/11852",0.0192901489385936,0.0192901489385936,0.258386468677477,"CTPS1/NME1",2
GO:1900102,"GO:1900102","negative regulation of endoplasmic reticulum unfolded protein response","2/236","11/11852",0.0192901489385936,0.0192901489385936,0.258386468677477,"HSPA5/PPP1R15A",2
GO:0034243,"GO:0034243","regulation of transcription elongation from RNA polymerase II promoter","3/236","29/11852",0.0194516477775024,0.0194516477775024,0.259143397117592,"SUPT6H/ELL/SUPT16H",3
GO:0006368,"GO:0006368","transcription elongation from RNA polymerase II promoter","5/236","78/11852",0.0195401249142892,0.0195401249142892,0.259143397117592,"SUPT6H/CCNK/ELL/SUPT16H/SSRP1",5
GO:0009161,"GO:0009161","ribonucleoside monophosphate metabolic process","11/236","272/11852",0.0203794373748171,0.0203794373748171,0.2670232150624,"CAD/OGDH/ZBTB7A/PKM/NUP50/NUP160/UMPS/DHODH/NUP98/NUP153/GART",11
GO:0040029,"GO:0040029","regulation of gene expression, epigenetic","12/236","308/11852",0.0205132336082159,0.0205132336082159,0.2670232150624,"TRIM27/NUP50/CNOT1/HMGA1/BAZ1B/ERCC6/NUP160/XPO5/MYBBP1A/NUP98/NUP153/ZNFX1",12
GO:0060147,"GO:0060147","regulation of posttranscriptional gene silencing","5/236","79/11852",0.0205329835708101,0.0205329835708101,0.2670232150624,"NUP50/NUP160/XPO5/NUP98/NUP153",5
GO:0060966,"GO:0060966","regulation of gene silencing by RNA","5/236","79/11852",0.0205329835708101,0.0205329835708101,0.2670232150624,"NUP50/NUP160/XPO5/NUP98/NUP153",5
GO:0032922,"GO:0032922","circadian regulation of gene expression","4/236","53/11852",0.020958392701195,0.020958392701195,0.270410791221957,"HUWE1/NOCT/MYBBP1A/PRMT5",4
GO:0009152,"GO:0009152","purine ribonucleotide biosynthetic process","9/236","204/11852",0.0209953525915358,0.0209953525915358,0.270410791221957,"OGDH/ZBTB7A/PKM/NUP50/NUP160/NUP98/NUP153/GART/NME1",9
GO:0009303,"GO:0009303","rRNA transcription","3/236","30/11852",0.0213022825895059,0.0213022825895059,0.270463004192031,"NOL11/NCL/IPPK",3
GO:0034080,"GO:0034080","CENP-A containing nucleosome assembly","3/236","30/11852",0.0213022825895059,0.0213022825895059,0.270463004192031,"NASP/RUVBL1/CENPO",3
GO:0061641,"GO:0061641","CENP-A containing chromatin organization","3/236","30/11852",0.0213022825895059,0.0213022825895059,0.270463004192031,"NASP/RUVBL1/CENPO",3
GO:0030518,"GO:0030518","intracellular steroid hormone receptor signaling pathway","6/236","109/11852",0.0216610104872181,0.0216610104872181,0.273720316236196,"ZBTB7A/SAFB2/SAFB/CNOT1/MED1/RBM14",6
GO:0016482,"GO:0016482","cytosolic transport","7/236","140/11852",0.0218939980534373,0.0218939980534373,0.275365579668881,"MSN/ANKFY1/UBE2O/TRIM27/SYBU/BET1L/ANKRD27",7
GO:0031100,"GO:0031100","animal organ regeneration","4/236","54/11852",0.0222918577291095,0.0222918577291095,0.279059409348665,"CAD/PKM/MED1/PRMT5",4
GO:0007530,"GO:0007530","sex determination","2/236","12/11852",0.0228478970657584,0.0228478970657584,0.284689831247761,"SF1/MAP3K4",2
GO:0055010,"GO:0055010","ventricular cardiac muscle tissue morphogenesis","3/236","31/11852",0.0232460261097262,0.0232460261097262,0.288309631818973,"CHD7/PKP2/MED1",3
GO:0042440,"GO:0042440","pigment metabolic process","4/236","55/11852",0.0236759976991515,0.0236759976991515,0.291336119483717,"MTHFD1L/SLC25A38/MTHFD1/GART",4
GO:0009119,"GO:0009119","ribonucleoside metabolic process","5/236","82/11852",0.0237075482691857,0.0237075482691857,0.291336119483717,"CAD/UMPS/CTPS1/DHODH/NME1",5
GO:0000289,"GO:0000289","nuclear-transcribed mRNA poly(A) tail shortening","3/236","32/11852",0.0252828661497535,0.0252828661497535,0.30372855487903,"SAMD4A/CNOT1/NOCT",3
GO:0010761,"GO:0010761","fibroblast migration","3/236","32/11852",0.0252828661497535,0.0252828661497535,0.30372855487903,"ARHGEF7/CORO1C/THBS1",3
GO:0031055,"GO:0031055","chromatin remodeling at centromere","3/236","32/11852",0.0252828661497535,0.0252828661497535,0.30372855487903,"NASP/RUVBL1/CENPO",3
GO:0042558,"GO:0042558","pteridine-containing compound metabolic process","3/236","32/11852",0.0252828661497535,0.0252828661497535,0.30372855487903,"MTHFD1L/MTHFD1/GART",3
GO:0051084,"GO:0051084","'de novo' posttranslational protein folding","3/236","32/11852",0.0252828661497535,0.0252828661497535,0.30372855487903,"HSPA5/DNAJC7/HSPA9",3
GO:0046394,"GO:0046394","carboxylic acid biosynthetic process","12/236","318/11852",0.0255246104313517,0.0255246104313517,0.305263785468939,"CAD/OGDH/ZBTB7A/PKM/NUP50/NUP160/MTHFD1L/MTHFD1/NUP98/NUP153/GART/HAS3",12
GO:0016053,"GO:0016053","organic acid biosynthetic process","12/236","319/11852",0.026071077778571,0.026071077778571,0.305304418388641,"CAD/OGDH/ZBTB7A/PKM/NUP50/NUP160/MTHFD1L/MTHFD1/NUP98/NUP153/GART/HAS3",12
GO:0048732,"GO:0048732","gland development","12/236","319/11852",0.026071077778571,0.026071077778571,0.305304418388641,"MSN/CAD/BTBD7/PKM/ETS1/MED1/UMPS/SEMA3C/DHODH/TNC/PRMT5/NME1",12
GO:0032392,"GO:0032392","DNA geometric change","6/236","114/11852",0.0263129568422511,0.0263129568422511,0.305304418388641,"CHD7/RAD54L/HMGA1/ERCC6/RUVBL1/SUPV3L1",6
GO:0003222,"GO:0003222","ventricular trabecula myocardium morphogenesis","2/236","13/11852",0.026652371091914,0.026652371091914,0.305304418388641,"CHD7/MED1",2
GO:0030575,"GO:0030575","nuclear body organization","2/236","13/11852",0.026652371091914,0.026652371091914,0.305304418388641,"SF1/ETS1",2
GO:0042730,"GO:0042730","fibrinolysis","2/236","13/11852",0.026652371091914,0.026652371091914,0.305304418388641,"THBS1/PLAUR",2
GO:0046831,"GO:0046831","regulation of RNA export from nucleus","2/236","13/11852",0.026652371091914,0.026652371091914,0.305304418388641,"SUPT6H/NUP153",2
GO:0060074,"GO:0060074","synapse maturation","2/236","13/11852",0.026652371091914,0.026652371091914,0.305304418388641,"ADGRL1/SYBU",2
GO:0019362,"GO:0019362","pyridine nucleotide metabolic process","7/236","146/11852",0.0267816154834044,0.0267816154834044,0.305304418388641,"OGDH/ZBTB7A/PKM/NUP50/NUP160/NUP98/NUP153",7
GO:0034249,"GO:0034249","negative regulation of cellular amide metabolic process","7/236","146/11852",0.0267816154834044,0.0267816154834044,0.305304418388641,"KHSRP/SYNCRIP/SAMD4A/ILF3/CNOT1/NCL/PUS7",7
GO:0046496,"GO:0046496","nicotinamide nucleotide metabolic process","7/236","146/11852",0.0267816154834044,0.0267816154834044,0.305304418388641,"OGDH/ZBTB7A/PKM/NUP50/NUP160/NUP98/NUP153",7
GO:1902475,"GO:1902475","L-alpha-amino acid transmembrane transport","3/236","33/11852",0.0274126678908743,0.0274126678908743,0.311174129269738,"SLC7A5/SLC25A38/SLC7A6",3
GO:0009166,"GO:0009166","nucleotide catabolic process","7/236","147/11852",0.0276629241280466,0.0276629241280466,0.312689948504902,"OGDH/ZBTB7A/PKM/NUP50/NUP160/NUP98/NUP153",7
GO:0006401,"GO:0006401","RNA catabolic process","13/236","361/11852",0.0287187729228943,0.0287187729228943,0.323260845151552,"KHSRP/PSME4/SMG7/SYNCRIP/YBX1/SAMD4A/CNOT1/RPS24/NOCT/APEX1/RNPS1/SUPV3L1/RBM38",13
GO:0006606,"GO:0006606","protein import into nucleus","6/236","117/11852",0.0294004104602359,0.0294004104602359,0.329548754112752,"NOLC1/NUP50/KPNB1/MED1/NUP98/NUP153",6
GO:0030808,"GO:0030808","regulation of nucleotide biosynthetic process","5/236","87/11852",0.0296711244749839,0.0296711244749839,0.329823156972414,"ZBTB7A/NUP50/NUP160/NUP98/NUP153",5
GO:1900371,"GO:1900371","regulation of purine nucleotide biosynthetic process","5/236","87/11852",0.0296711244749839,0.0296711244749839,0.329823156972414,"ZBTB7A/NUP50/NUP160/NUP98/NUP153",5
GO:0031570,"GO:0031570","DNA integrity checkpoint","7/236","150/11852",0.0304246711351193,0.0304246711351193,0.330214391781754,"CCAR2/CNOT1/INTS7/PEA15/ORC1/E2F4/CLSPN",7
GO:1901292,"GO:1901292","nucleoside phosphate catabolic process","7/236","150/11852",0.0304246711351193,0.0304246711351193,0.330214391781754,"OGDH/ZBTB7A/PKM/NUP50/NUP160/NUP98/NUP153",7
GO:0000463,"GO:0000463","maturation of LSU-rRNA from tricistronic rRNA transcript (SSU-rRNA, 5.8S rRNA, LSU-rRNA)","2/236","14/11852",0.0306924221516597,0.0306924221516597,0.330214391781754,"URB1/FTSJ3",2
GO:0003215,"GO:0003215","cardiac right ventricle morphogenesis","2/236","14/11852",0.0306924221516597,0.0306924221516597,0.330214391781754,"CHD7/SEMA3C",2
GO:0006999,"GO:0006999","nuclear pore organization","2/236","14/11852",0.0306924221516597,0.0306924221516597,0.330214391781754,"NUP98/NUP153",2
GO:0007263,"GO:0007263","nitric oxide mediated signal transduction","2/236","14/11852",0.0306924221516597,0.0306924221516597,0.330214391781754,"DDAH1/THBS1",2
GO:0042789,"GO:0042789","mRNA transcription by RNA polymerase II","2/236","14/11852",0.0306924221516597,0.0306924221516597,0.330214391781754,"SUPT6H/MED1",2
GO:2000651,"GO:2000651","positive regulation of sodium ion transmembrane transporter activity","2/236","14/11852",0.0306924221516597,0.0306924221516597,0.330214391781754,"WNK1/CNKSR3",2
GO:0051591,"GO:0051591","response to cAMP","4/236","60/11852",0.0313690705526098,0.0313690705526098,0.335054342252604,"HSPA5/APEX1/FOSL1/NME1",4
GO:0009123,"GO:0009123","nucleoside monophosphate metabolic process","11/236","291/11852",0.0313924196110544,0.0313924196110544,0.335054342252604,"CAD/OGDH/ZBTB7A/PKM/NUP50/NUP160/UMPS/DHODH/NUP98/NUP153/GART",11
GO:0048701,"GO:0048701","embryonic cranial skeleton morphogenesis","3/236","35/11852",0.0319500429435171,0.0319500429435171,0.339652712160614,"IRX5/MTHFD1L/MTHFD1",3
GO:0022612,"GO:0022612","gland morphogenesis","5/236","89/11852",0.0322985226489738,0.0322985226489738,0.341361508633575,"MSN/BTBD7/MED1/SEMA3C/TNC",5
GO:0072524,"GO:0072524","pyridine-containing compound metabolic process","7/236","152/11852",0.0323656314472619,0.0323656314472619,0.341361508633575,"OGDH/ZBTB7A/PKM/NUP50/NUP160/NUP98/NUP153",7
GO:0002262,"GO:0002262","myeloid cell homeostasis","6/236","120/11852",0.0327171577740753,0.0327171577740753,0.343715857729708,"ZBTB7A/ETS1/RPS24/MED1/HSPA9/SLC25A38",6
GO:0034248,"GO:0034248","regulation of cellular amide metabolic process","13/236","370/11852",0.0340595096725412,0.0340595096725412,0.354729611902719,"KHSRP/SYNCRIP/SAMD4A/ILF3/NOLC1/CNOT1/PPP1R15A/NCL/PUS7/GEMIN5/PA2G4/THBS1/NAT10",13
GO:1902116,"GO:1902116","negative regulation of organelle assembly","3/236","36/11852",0.034356790969597,0.034356790969597,0.354729611902719,"CHMP4B/RBM14/TBC1D30",3
GO:0006337,"GO:0006337","nucleosome disassembly","2/236","15/11852",0.0349572442692345,0.0349572442692345,0.354729611902719,"HMGA1/SUPT16H",2
GO:0008209,"GO:0008209","androgen metabolic process","2/236","15/11852",0.0349572442692345,0.0349572442692345,0.354729611902719,"SCARB1/MED1",2
GO:0019400,"GO:0019400","alditol metabolic process","2/236","15/11852",0.0349572442692345,0.0349572442692345,0.354729611902719,"MYOF/SORD",2
GO:0032239,"GO:0032239","regulation of nucleobase-containing compound transport","2/236","15/11852",0.0349572442692345,0.0349572442692345,0.354729611902719,"SUPT6H/NUP153",2
GO:0051895,"GO:0051895","negative regulation of focal adhesion assembly","2/236","15/11852",0.0349572442692345,0.0349572442692345,0.354729611902719,"CORO1C/THBS1",2
GO:0071305,"GO:0071305","cellular response to vitamin D","2/236","15/11852",0.0349572442692345,0.0349572442692345,0.354729611902719,"MED1/TNC",2
GO:0072673,"GO:0072673","lamellipodium morphogenesis","2/236","15/11852",0.0349572442692345,0.0349572442692345,0.354729611902719,"ARHGEF7/CORO1C",2
GO:0009199,"GO:0009199","ribonucleoside triphosphate metabolic process","10/236","261/11852",0.036213523560375,0.036213523560375,0.366091032616304,"CAD/OGDH/ZBTB7A/PKM/NUP50/NUP160/CTPS1/NUP98/NUP153/NME1",10
GO:0071156,"GO:0071156","regulation of cell cycle arrest","5/236","92/11852",0.0365046289618711,0.0365046289618711,0.367034332915078,"CCNK/SDE2/CNOT1/MYBBP1A/E2F4",5
GO:1903901,"GO:1903901","negative regulation of viral life cycle","4/236","63/11852",0.0366120095598564,0.0366120095598564,0.367034332915078,"CCNK/TRIM27/ILF3/IFITM2",4
GO:0003229,"GO:0003229","ventricular cardiac muscle tissue development","3/236","37/11852",0.0368548619946752,0.0368548619946752,0.367034332915078,"CHD7/PKP2/MED1",3
GO:0098534,"GO:0098534","centriole assembly","3/236","37/11852",0.0368548619946752,0.0368548619946752,0.367034332915078,"CCDC78/RBM14/E2F4",3
GO:0030218,"GO:0030218","erythrocyte differentiation","5/236","93/11852",0.0379780833815142,0.0379780833815142,0.375429101596246,"ZBTB7A/ETS1/MED1/HSPA9/SLC25A38",5
GO:0051193,"GO:0051193","regulation of cofactor metabolic process","5/236","93/11852",0.0379780833815142,0.0379780833815142,0.375429101596246,"ZBTB7A/NUP50/NUP160/NUP98/NUP153",5
GO:0031023,"GO:0031023","microtubule organizing center organization","6/236","125/11852",0.0387681031593606,0.0387681031593606,0.377383327011056,"NDEL1/CCDC78/CHMP4B/XRCC2/RBM14/E2F4",6
GO:0006310,"GO:0006310","DNA recombination","9/236","228/11852",0.0389190705438659,0.0389190705438659,0.377383327011056,"SUPT6H/LIG3/PSMC3IP/RAD54L/XRCC2/RBM14/RUVBL1/APEX1/SUPV3L1",9
GO:0000076,"GO:0000076","DNA replication checkpoint","2/236","16/11852",0.039436365218397,0.039436365218397,0.377383327011056,"ORC1/CLSPN",2
GO:0000963,"GO:0000963","mitochondrial RNA processing","2/236","16/11852",0.039436365218397,0.039436365218397,0.377383327011056,"SUPV3L1/ELAC2",2
GO:0048820,"GO:0048820","hair follicle maturation","2/236","16/11852",0.039436365218397,0.039436365218397,0.377383327011056,"NOM1/NSUN2",2
GO:1902307,"GO:1902307","positive regulation of sodium ion transmembrane transport","2/236","16/11852",0.039436365218397,0.039436365218397,0.377383327011056,"WNK1/CNKSR3",2
GO:0006336,"GO:0006336","DNA replication-independent nucleosome assembly","3/236","38/11852",0.0394436011728648,0.0394436011728648,0.377383327011056,"NASP/RUVBL1/CENPO",3
GO:0032456,"GO:0032456","endocytic recycling","3/236","38/11852",0.0394436011728648,0.0394436011728648,0.377383327011056,"EPG5/EHD4/CCDC93",3
GO:0035722,"GO:0035722","interleukin-12-mediated signaling pathway","3/236","38/11852",0.0394436011728648,0.0394436011728648,0.377383327011056,"MSN/CNN2/HSPA9",3
GO:0006694,"GO:0006694","steroid biosynthetic process","6/236","126/11852",0.0400581894841269,0.0400581894841269,0.381899577587949,"SF1/NFYA/SCARB1/KPNB1/MED1/DHCR7",6
GO:0043279,"GO:0043279","response to alkaloid","4/236","65/11852",0.0403711691247066,0.0403711691247066,0.383518571938702,"CAD/HSPA5/PEA15/DHODH",4
GO:1903578,"GO:1903578","regulation of ATP metabolic process","5/236","95/11852",0.0410330583604523,0.0410330583604523,0.388428988385163,"ZBTB7A/NUP50/NUP160/NUP98/NUP153",5
GO:0009411,"GO:0009411","response to UV","6/236","127/11852",0.0413752350839161,0.0413752350839161,0.389078551771786,"POLD3/SDE2/MAP3K4/CCAR2/ERCC6/E2F4",6
GO:0046434,"GO:0046434","organophosphate catabolic process","8/236","195/11852",0.0413921484841694,0.0413921484841694,0.389078551771786,"OGDH/ZBTB7A/PKM/SCARB1/NUP50/NUP160/NUP98/NUP153",8
GO:0045646,"GO:0045646","regulation of erythrocyte differentiation","3/236","39/11852",0.0421222666922563,0.0421222666922563,0.389690925171004,"ETS1/MED1/HSPA9",3
GO:0051293,"GO:0051293","establishment of spindle localization","3/236","39/11852",0.0421222666922563,0.0421222666922563,0.389690925171004,"MYH9/NDEL1/KPNB1",3
GO:0071364,"GO:0071364","cellular response to epidermal growth factor stimulus","3/236","39/11852",0.0421222666922563,0.0421222666922563,0.389690925171004,"CAD/MED1/NCL",3
GO:0033143,"GO:0033143","regulation of intracellular steroid hormone receptor signaling pathway","4/236","66/11852",0.0423300810465713,0.0423300810465713,0.389690925171004,"ZBTB7A/SAFB2/CNOT1/MED1",4
GO:0050000,"GO:0050000","chromosome localization","4/236","66/11852",0.0423300810465713,0.0423300810465713,0.389690925171004,"NDEL1/KPNB1/CHMP4B/NUP98",4
GO:0050810,"GO:0050810","regulation of steroid biosynthetic process","4/236","66/11852",0.0423300810465713,0.0423300810465713,0.389690925171004,"SF1/NFYA/KPNB1/DHCR7",4
GO:0010821,"GO:0010821","regulation of mitochondrion organization","7/236","162/11852",0.0433110467634108,0.0433110467634108,0.397356214898632,"HUWE1/LIG3/PPP1R13B/MIEF1/DHODH/INF2/PLAUR",7
GO:0031123,"GO:0031123","RNA 3'-end processing","6/236","129/11852",0.0440906908249981,0.0440906908249981,0.397960225809471,"INTS7/SYMPK/RNPS1/SRSF4/SUPV3L1/ELAC2",6
GO:0031498,"GO:0031498","chromatin disassembly","2/236","17/11852",0.0441196376079144,0.0441196376079144,0.397960225809471,"HMGA1/SUPT16H",2
[truncated: 2,562 more rows]

## Sheet: GO_HM_clust_B6_3
,"ID","Description","GeneRatio","BgRatio","pvalue","p.adjust","qvalue","geneID","Count"
[truncated: 3,085 more rows]

## Sheet: GO_HM_clust_H6_4
,"ID","Description","GeneRatio","BgRatio","pvalue","p.adjust","qvalue","geneID","Count"
[truncated: 1,755 more rows]

[truncated: 13 more sheets: GO_HM_clust_H6_5, GO_HM_clust_H6_6, GO_HM_clust_H6_7, GO_HM_clust_H6_8, GO_HM_clust_B12_9, GO_HM_clust_B12_10, GO_HM_clust_B12_11, GO_HM_clust_B12_12, GO_HM_clust_B12_13, GO_HM_clust_H12_14, GO_HM_clust_H12_15, GO_HM_clust_H12_16, GO_HM_clust_H12_17]
