# Supplementary material for: Decoding mechanism of action and sensitivity to drug candidates from integrated transcriptome and chromatin state
Source: eLife. 2022 Aug 31;11:e78012. doi: 10.7554/eLife.78012 (PMC9433094; doi:10.7554/eLife.78012)
Supplement: Supplementary file 3. [file elife-78012-supp3.xlsx]

## Sheet: cluster1
,"ID","Description","GeneRatio","BgRatio","pvalue","p.adjust","qvalue","geneID","Count"
GO:0019079,"GO:0019079","viral genome replication","7/120","102/12302",6.05381237890203e-05,6.05381237890203e-05,0.134776980856608,"FAM111A/NUCKS1/DDX3X/GAS6/CTBP2/LARP1/VCP",7
GO:0034349,"GO:0034349","glial cell apoptotic process","3/120","12/12302",0.000186754598027004,0.000186754598027004,0.157393199567069,"CASP9/GAS6/CASP3",3
GO:0019058,"GO:0019058","viral life cycle","10/120","258/12302",0.000212090127076193,0.000212090127076193,0.157393199567069,"NECTIN2/FAM111A/NUCKS1/DDX3X/SNX3/GAS6/CTBP2/LARP1/UBB/VCP",10
GO:0000715,"GO:0000715","nucleotide-excision repair, DNA damage recognition","3/120","18/12302",0.000663698670742663,0.000663698670742663,0.286560360632321,"DDB2/COPS7A/UBB",3
GO:1900078,"GO:1900078","positive regulation of cellular response to insulin stimulus","3/120","19/12302",0.000782554465386068,0.000782554465386068,0.286560360632321,"MYO1C/NUCKS1/ESRRA",3
GO:1903900,"GO:1903900","regulation of viral life cycle","6/120","115/12302",0.000900348974198242,0.000900348974198242,0.286560360632321,"NECTIN2/FAM111A/NUCKS1/DDX3X/SNX3/LARP1",6
GO:1990823,"GO:1990823","response to leukemia inhibitory factor","5/120","79/12302",0.00102972044482536,0.00102972044482536,0.286560360632321,"RIF1/GNPNAT1/RARG/CTBP2/MPC1",5
GO:1990830,"GO:1990830","cellular response to leukemia inhibitory factor","5/120","79/12302",0.00102972044482536,0.00102972044482536,0.286560360632321,"RIF1/GNPNAT1/RARG/CTBP2/MPC1",5
GO:0070646,"GO:0070646","protein modification by small protein removal","8/120","214/12302",0.00116696789260144,0.00116696789260144,0.288671005011935,"OTUD5/DDB2/MYC/COPS7A/SNX3/JOSD1/UBB/VCP",8
GO:0002200,"GO:0002200","somatic diversification of immune receptors","4/120","53/12302",0.00174392962817657,0.00174392962817657,0.330226818329114,"RIF1/DCAF1/SHLD1/POLM",4
GO:0002714,"GO:0002714","positive regulation of B cell mediated immunity","3/120","25/12302",0.00177994597113565,0.00177994597113565,0.330226818329114,"NECTIN2/RIF1/SHLD1",3
GO:0002891,"GO:0002891","positive regulation of immunoglobulin mediated immune response","3/120","25/12302",0.00177994597113565,0.00177994597113565,0.330226818329114,"NECTIN2/RIF1/SHLD1",3
GO:0048384,"GO:0048384","retinoic acid receptor signaling pathway","3/120","27/12302",0.00223174740560711,0.00223174740560711,0.365885067055768,"RARG/CREM/CTBP2",3
GO:0006446,"GO:0006446","regulation of translational initiation","4/120","60/12302",0.00275617865368218,0.00275617865368218,0.365885067055768,"DDX3X/EIF1/LARP1/EIF2AK1",4
GO:0045070,"GO:0045070","positive regulation of viral genome replication","3/120","30/12302",0.00303260377629446,0.00303260377629446,0.365885067055768,"NUCKS1/DDX3X/LARP1",3
GO:0006281,"GO:0006281","DNA repair","11/120","432/12302",0.00329204059350212,0.00329204059350212,0.365885067055768,"RIF1/ENDOV/DDB2/COPS7A/NUCKS1/UBB/SHLD1/TNKS1BP1/WDHD1/VCP/POLM",11
GO:0016579,"GO:0016579","protein deubiquitination","7/120","203/12302",0.00371474127910229,0.00371474127910229,0.365885067055768,"OTUD5/DDB2/MYC/SNX3/JOSD1/UBB/VCP",7
GO:0032025,"GO:0032025","response to cobalt ion","2/120","10/12302",0.00403451023392231,0.00403451023392231,0.365885067055768,"CASP9/CASP3",2
GO:0044406,"GO:0044406","adhesion of symbiont to host","2/120","10/12302",0.00403451023392231,0.00403451023392231,0.365885067055768,"NECTIN2/GAS6",2
GO:0046007,"GO:0046007","negative regulation of activated T cell proliferation","2/120","10/12302",0.00403451023392231,0.00403451023392231,0.365885067055768,"PRKAR1A/CASP3",2
GO:2001034,"GO:2001034","positive regulation of double-strand break repair via nonhomologous end joining","2/120","10/12302",0.00403451023392231,0.00403451023392231,0.365885067055768,"RIF1/SHLD1",2
GO:0002712,"GO:0002712","regulation of B cell mediated immunity","3/120","34/12302",0.00434504551478637,0.00434504551478637,0.365885067055768,"NECTIN2/RIF1/SHLD1",3
GO:0002889,"GO:0002889","regulation of immunoglobulin mediated immune response","3/120","34/12302",0.00434504551478637,0.00434504551478637,0.365885067055768,"NECTIN2/RIF1/SHLD1",3
GO:0050792,"GO:0050792","regulation of viral process","6/120","159/12302",0.00461958397382696,0.00461958397382696,0.365885067055768,"NECTIN2/FAM111A/NUCKS1/DDX3X/SNX3/LARP1",6
GO:0032225,"GO:0032225","regulation of synaptic transmission, dopaminergic","2/120","11/12302",0.00489971937984649,0.00489971937984649,0.365885067055768,"RAB3B/PNKD",2
GO:0033599,"GO:0033599","regulation of mammary gland epithelial cell proliferation","2/120","11/12302",0.00489971937984649,0.00489971937984649,0.365885067055768,"GPX1/IQGAP3",2
GO:0072075,"GO:0072075","metanephric mesenchyme development","2/120","11/12302",0.00489971937984649,0.00489971937984649,0.365885067055768,"MYC/BMP7",2
GO:1901722,"GO:1901722","regulation of cell proliferation involved in kidney development","2/120","11/12302",0.00489971937984649,0.00489971937984649,0.365885067055768,"MYC/BMP7",2
GO:0009411,"GO:0009411","response to UV","5/120","114/12302",0.00512304639736146,0.00512304639736146,0.365885067055768,"CASP9/DDB2/MYC/GPX1/CASP3",5
GO:0000082,"GO:0000082","G1/S transition of mitotic cell cycle","7/120","216/12302",0.00520665944873935,0.00520665944873935,0.365885067055768,"CNOT4/JADE1/MYC/DDX3X/CTDSP1/IQGAP3/TNKS1BP1",7
GO:0010212,"GO:0010212","response to ionizing radiation","5/120","117/12302",0.00571405911743862,0.00571405911743862,0.365885067055768,"MYC/GPX1/NUCKS1/TNKS1BP1/CASP3",5
GO:0043281,"GO:0043281","regulation of cysteine-type endopeptidase activity involved in apoptotic process","6/120","170/12302",0.00637155916064351,0.00637155916064351,0.365885067055768,"CASP9/MYC/GPX1/DDX3X/GAS6/VCP",6
GO:0042130,"GO:0042130","negative regulation of T cell proliferation","3/120","39/12302",0.00640580683532304,0.00640580683532304,0.365885067055768,"PELI1/PRKAR1A/CASP3",3
GO:0043903,"GO:0043903","regulation of symbiosis, encompassing mutualism through parasitism","6/120","171/12302",0.00655183399856007,0.00655183399856007,0.365885067055768,"NECTIN2/FAM111A/NUCKS1/DDX3X/SNX3/LARP1",6
GO:0042113,"GO:0042113","B cell activation","6/120","172/12302",0.00673579365700685,0.00673579365700685,0.365885067055768,"RIF1/PELI1/DCAF1/SHLD1/CASP3/POLM",6
GO:0030220,"GO:0030220","platelet formation","2/120","13/12302",0.00686072270368089,0.00686072270368089,0.365885067055768,"CASP9/CASP3",2
GO:0097193,"GO:0097193","intrinsic apoptotic signaling pathway","7/120","228/12302",0.00694810645997895,0.00694810645997895,0.365885067055768,"CASP9/GPX1/DDX3X/DDIT3/UBB/ING2/CASP3",7
GO:0045069,"GO:0045069","regulation of viral genome replication","4/120","79/12302",0.00737266362180149,0.00737266362180149,0.365885067055768,"FAM111A/NUCKS1/DDX3X/LARP1",4
GO:0044843,"GO:0044843","cell cycle G1/S phase transition","7/120","232/12302",0.00761515214710514,0.00761515214710514,0.365885067055768,"CNOT4/JADE1/MYC/DDX3X/CTDSP1/IQGAP3/TNKS1BP1",7
GO:0198738,"GO:0198738","cell-cell signaling by wnt","10/120","419/12302",0.00782579320460842,0.00782579320460842,0.365885067055768,"JADE1/RARG/DDX3X/BCL9/PTPN23/DDIT3/SNX3/UBB/VCP/LRP4",10
GO:0016445,"GO:0016445","somatic diversification of immunoglobulins","3/120","42/12302",0.00787838476708644,0.00787838476708644,0.365885067055768,"RIF1/SHLD1/POLM",3
GO:0036344,"GO:0036344","platelet morphogenesis","2/120","14/12302",0.00795340683564364,0.00795340683564364,0.365885067055768,"CASP9/CASP3",2
GO:2000641,"GO:2000641","regulation of early endosome to late endosome transport","2/120","14/12302",0.00795340683564364,0.00795340683564364,0.365885067055768,"PTPN23/SNX3",2
GO:0050864,"GO:0050864","regulation of B cell activation","4/120","81/12302",0.00804362796124076,0.00804362796124076,0.365885067055768,"RIF1/PELI1/SHLD1/CASP3",4
GO:0014020,"GO:0014020","primary neural tube formation","4/120","83/12302",0.00875352612382196,0.00875352612382196,0.365885067055768,"RARG/BMP7/IFT122/CASP3",4
GO:2001234,"GO:2001234","negative regulation of apoptotic signaling pathway","6/120","183/12302",0.00901458455329511,0.00901458455329511,0.365885067055768,"GNAI3/GPX1/DDX3X/MNT/ING2/MAZ",6
GO:2001242,"GO:2001242","regulation of intrinsic apoptotic signaling pathway","5/120","131/12302",0.00911790296632665,0.00911790296632665,0.365885067055768,"GPX1/DDX3X/DDIT3/UBB/ING2",5
GO:0071243,"GO:0071243","cellular response to arsenic-containing substance","2/120","15/12302",0.00911884354940952,0.00911884354940952,0.365885067055768,"DDX3X/VCP",2
GO:0072074,"GO:0072074","kidney mesenchyme development","2/120","15/12302",0.00911884354940952,0.00911884354940952,0.365885067055768,"MYC/BMP7",2
GO:2000042,"GO:2000042","negative regulation of double-strand break repair via homologous recombination","2/120","15/12302",0.00911884354940952,0.00911884354940952,0.365885067055768,"RIF1/SHLD1",2
GO:0043433,"GO:0043433","negative regulation of DNA-binding transcription factor activity","5/120","132/12302",0.00940472477461198,0.00940472477461198,0.365885067055768,"PELI1/FOXA2/BMP7/DDIT3/GAS6",5
GO:0002562,"GO:0002562","somatic diversification of immune receptors via germline recombination within a single locus","3/120","45/12302",0.00953477488389456,0.00953477488389456,0.365885067055768,"RIF1/DCAF1/SHLD1",3
GO:0016444,"GO:0016444","somatic cell DNA recombination","3/120","45/12302",0.00953477488389456,0.00953477488389456,0.365885067055768,"RIF1/DCAF1/SHLD1",3
GO:0090183,"GO:0090183","regulation of kidney development","3/120","45/12302",0.00953477488389456,0.00953477488389456,0.365885067055768,"MYC/PRKX/BMP7",3
GO:0034655,"GO:0034655","nucleobase-containing compound catabolic process","11/120","500/12302",0.00961415142161827,0.00961415142161827,0.365885067055768,"CNOT4/EXOSC9/GPX1/NBAS/DPYD/LARP1/UBB/TNKS1BP1/VCP/CASP3/HELZ2",11
GO:0032945,"GO:0032945","negative regulation of mononuclear cell proliferation","3/120","46/12302",0.0101285408869638,0.0101285408869638,0.365885067055768,"PELI1/PRKAR1A/CASP3",3
GO:0050672,"GO:0050672","negative regulation of lymphocyte proliferation","3/120","46/12302",0.0101285408869638,0.0101285408869638,0.365885067055768,"PELI1/PRKAR1A/CASP3",3
GO:2000116,"GO:2000116","regulation of cysteine-type endopeptidase activity","6/120","188/12302",0.0102145146295467,0.0102145146295467,0.365885067055768,"CASP9/MYC/GPX1/DDX3X/GAS6/VCP",6
GO:0045947,"GO:0045947","negative regulation of translational initiation","2/120","16/12302",0.0103555338408165,0.0103555338408165,0.365885067055768,"LARP1/EIF2AK1",2
GO:2001032,"GO:2001032","regulation of double-strand break repair via nonhomologous end joining","2/120","16/12302",0.0103555338408165,0.0103555338408165,0.365885067055768,"RIF1/SHLD1",2
GO:0006302,"GO:0006302","double-strand break repair","6/120","190/12302",0.0107249265909421,0.0107249265909421,0.365885067055768,"RIF1/NUCKS1/SHLD1/TNKS1BP1/VCP/POLM",6
GO:0043525,"GO:0043525","positive regulation of neuron apoptotic process","3/120","47/12302",0.0107433703091352,0.0107433703091352,0.365885067055768,"CASP9/DDIT3/CASP3",3
GO:0071478,"GO:0071478","cellular response to radiation","5/120","138/12302",0.0112573411460374,0.0112573411460374,0.365885067055768,"CASP9/DDB2/MYC/NUCKS1/TNKS1BP1",5
GO:0001841,"GO:0001841","neural tube formation","4/120","90/12302",0.0115569869517221,0.0115569869517221,0.365885067055768,"RARG/BMP7/IFT122/CASP3",4
GO:0000717,"GO:0000717","nucleotide-excision repair, DNA duplex unwinding","2/120","17/12302",0.0116620006021897,0.0116620006021897,0.365885067055768,"DDB2/UBB",2
GO:0007141,"GO:0007141","male meiosis I","2/120","17/12302",0.0116620006021897,0.0116620006021897,0.365885067055768,"UBB/ING2",2
GO:0045830,"GO:0045830","positive regulation of isotype switching","2/120","17/12302",0.0116620006021897,0.0116620006021897,0.365885067055768,"RIF1/SHLD1",2
GO:0070987,"GO:0070987","error-free translesion synthesis","2/120","17/12302",0.0116620006021897,0.0116620006021897,0.365885067055768,"UBB/VCP",2
GO:0072111,"GO:0072111","cell proliferation involved in kidney development","2/120","17/12302",0.0116620006021897,0.0116620006021897,0.365885067055768,"MYC/BMP7",2
GO:2000045,"GO:2000045","regulation of G1/S transition of mitotic cell cycle","5/120","140/12302",0.011926498383783,0.011926498383783,0.365885067055768,"CNOT4/JADE1/DDX3X/CTDSP1/TNKS1BP1",5
GO:0070664,"GO:0070664","negative regulation of leukocyte proliferation","3/120","49/12302",0.0120367356946094,0.0120367356946094,0.365885067055768,"PELI1/PRKAR1A/CASP3",3
GO:1905515,"GO:1905515","non-motile cilium assembly","3/120","49/12302",0.0120367356946094,0.0120367356946094,0.365885067055768,"BBS10/PCM1/IFT122",3
GO:0071214,"GO:0071214","cellular response to abiotic stimulus","7/120","254/12302",0.0121615698411444,0.0121615698411444,0.365885067055768,"CASP9/DDB2/MYC/NUCKS1/DDX3X/TNKS1BP1/CASP3",7
GO:0104004,"GO:0104004","cellular response to environmental stimulus","7/120","254/12302",0.0121615698411444,0.0121615698411444,0.365885067055768,"CASP9/DDB2/MYC/NUCKS1/DDX3X/TNKS1BP1/CASP3",7
GO:1903902,"GO:1903902","positive regulation of viral life cycle","3/120","50/12302",0.0127155047608669,0.0127155047608669,0.376935165369206,"NUCKS1/DDX3X/LARP1",3
GO:0001963,"GO:0001963","synaptic transmission, dopaminergic","2/120","18/12302",0.0130367883436205,0.0130367883436205,0.376935165369206,"RAB3B/PNKD",2
GO:0044346,"GO:0044346","fibroblast apoptotic process","2/120","18/12302",0.0130367883436205,0.0130367883436205,0.376935165369206,"MYC/GAS6",2
GO:0030099,"GO:0030099","myeloid cell differentiation","8/120","321/12302",0.0132611267783365,0.0132611267783365,0.378505845292602,"CNOT4/CASP9/MYC/RARG/PRKX/ESRRA/EIF2AK1/CASP3",8
GO:0030705,"GO:0030705","cytoskeleton-dependent intracellular transport","5/120","145/12302",0.0137167344630514,0.0137167344630514,0.381914398388088,"MREG/MYO1C/PCM1/IFT122/UBB",5
GO:2001233,"GO:2001233","regulation of apoptotic signaling pathway","8/120","323/12302",0.0137236379562623,0.0137236379562623,0.381914398388088,"GNAI3/GPX1/DDX3X/MNT/DDIT3/UBB/ING2/MAZ",8
GO:0030968,"GO:0030968","endoplasmic reticulum unfolded protein response","4/120","96/12302",0.0143735556245415,0.0143735556245415,0.393558306646805,"TBL2/TPP1/DDIT3/VCP",4
GO:0060070,"GO:0060070","canonical Wnt signaling pathway","7/120","263/12302",0.01449559909588,0.01449559909588,0.393558306646805,"JADE1/RARG/DDX3X/BCL9/DDIT3/VCP/LRP4",7
GO:0042594,"GO:0042594","response to starvation","5/120","150/12302",0.0156801485760861,0.0156801485760861,0.404339183957583,"TBL2/DDIT3/GAS6/LARP1/EIF2AK1",5
GO:0033598,"GO:0033598","mammary gland epithelial cell proliferation","2/120","20/12302",0.0159856112464796,0.0159856112464796,0.404339183957583,"GPX1/IQGAP3",2
GO:0051654,"GO:0051654","establishment of mitochondrion localization","2/120","20/12302",0.0159856112464796,0.0159856112464796,0.404339183957583,"NECTIN2/UBB",2
GO:0050871,"GO:0050871","positive regulation of B cell activation","3/120","55/12302",0.0164340156102921,0.0164340156102921,0.404339183957583,"RIF1/PELI1/SHLD1",3
GO:0032355,"GO:0032355","response to estradiol","4/120","100/12302",0.0164731825233345,0.0164731825233345,0.404339183957583,"CASP9/BMP7/ESRRA/CASP3",4
GO:0006402,"GO:0006402","mRNA catabolic process","7/120","270/12302",0.016520794963782,0.016520794963782,0.404339183957583,"CNOT4/EXOSC9/NBAS/LARP1/UBB/TNKS1BP1/HELZ2",7
GO:0001838,"GO:0001838","embryonic epithelial tube formation","4/120","101/12302",0.0170265318848521,0.0170265318848521,0.404339183957583,"RARG/BMP7/IFT122/CASP3",4
GO:0000956,"GO:0000956","nuclear-transcribed mRNA catabolic process","5/120","154/12302",0.0173799922112303,0.0173799922112303,0.404339183957583,"CNOT4/EXOSC9/NBAS/TNKS1BP1/HELZ2",5
GO:0031063,"GO:0031063","regulation of histone deacetylation","2/120","21/12302",0.0175568410541859,0.0175568410541859,0.404339183957583,"ZNHIT1/ING2",2
GO:0045191,"GO:0045191","regulation of isotype switching","2/120","21/12302",0.0175568410541859,0.0175568410541859,0.404339183957583,"RIF1/SHLD1",2
GO:0070911,"GO:0070911","global genome nucleotide-excision repair","2/120","21/12302",0.0175568410541859,0.0175568410541859,0.404339183957583,"DDB2/UBB",2
GO:1903649,"GO:1903649","regulation of cytoplasmic transport","2/120","21/12302",0.0175568410541859,0.0175568410541859,0.404339183957583,"PTPN23/SNX3",2
GO:2000134,"GO:2000134","negative regulation of G1/S transition of mitotic cell cycle","4/120","102/12302",0.0175913985405026,0.0175913985405026,0.404339183957583,"CNOT4/JADE1/CTDSP1/TNKS1BP1",4
GO:0097190,"GO:0097190","apoptotic signaling pathway","10/120","475/12302",0.0176636203807237,0.0176636203807237,0.404339183957583,"GNAI3/CASP9/GPX1/DDX3X/MNT/DDIT3/UBB/ING2/MAZ/CASP3",10
GO:1902806,"GO:1902806","regulation of cell cycle G1/S phase transition","5/120","155/12302",0.01782330160353,0.01782330160353,0.404339183957583,"CNOT4/JADE1/DDX3X/CTDSP1/TNKS1BP1",5
GO:0046596,"GO:0046596","regulation of viral entry into host cell","2/120","22/12302",0.0191907805997187,0.0191907805997187,0.404339183957583,"NECTIN2/SNX3",2
GO:0060740,"GO:0060740","prostate gland epithelium morphogenesis","2/120","22/12302",0.0191907805997187,0.0191907805997187,0.404339183957583,"RARG/BMP7",2
GO:0043280,"GO:0043280","positive regulation of cysteine-type endopeptidase activity involved in apoptotic process","4/120","105/12302",0.0193557538611096,0.0193557538611096,0.404339183957583,"CASP9/MYC/DDX3X/VCP",4
GO:0043632,"GO:0043632","modification-dependent macromolecule catabolic process","10/120","483/12302",0.0195993469970873,0.0195993469970873,0.404339183957583,"CNOT4/FBXO33/PELI1/SVIP/EXOSC9/UBR4/PTPN23/DDIT3/UBB/VCP",10
GO:0071897,"GO:0071897","DNA biosynthetic process","5/120","159/12302",0.0196713520523515,0.0196713520523515,0.404339183957583,"MYC/UBB/TNKS1BP1/VCP/POLM",5
GO:1900076,"GO:1900076","regulation of cellular response to insulin stimulus","3/120","59/12302",0.0198025077504121,0.0198025077504121,0.404339183957583,"MYO1C/NUCKS1/ESRRA",3
GO:0030326,"GO:0030326","embryonic limb morphogenesis","4/120","106/12302",0.0199673302729391,0.0199673302729391,0.404339183957583,"RARG/BMP7/IFT122/LRP4",4
GO:0035113,"GO:0035113","embryonic appendage morphogenesis","4/120","106/12302",0.0199673302729391,0.0199673302729391,0.404339183957583,"RARG/BMP7/IFT122/LRP4",4
GO:1902807,"GO:1902807","negative regulation of cell cycle G1/S phase transition","4/120","106/12302",0.0199673302729391,0.0199673302729391,0.404339183957583,"CNOT4/JADE1/CTDSP1/TNKS1BP1",4
GO:0034620,"GO:0034620","cellular response to unfolded protein","4/120","107/12302",0.020590733269799,0.020590733269799,0.404339183957583,"TBL2/TPP1/DDIT3/VCP",4
GO:0045786,"GO:0045786","negative regulation of cell cycle","10/120","487/12302",0.0206238673793039,0.0206238673793039,0.404339183957583,"CNOT4/JADE1/MYC/CTDSP1/BMP7/DDIT3/GAS6/TNKS1BP1/PRKAR1A/CASP3",10
GO:0000288,"GO:0000288","nuclear-transcribed mRNA catabolic process, deadenylation-dependent decay","3/120","60/12302",0.0206996829660295,0.0206996829660295,0.404339183957583,"CNOT4/EXOSC9/TNKS1BP1",3
GO:0016055,"GO:0016055","Wnt signaling pathway","9/120","417/12302",0.0207543017427765,0.0207543017427765,0.404339183957583,"JADE1/RARG/DDX3X/BCL9/DDIT3/SNX3/UBB/VCP/LRP4",9
GO:0006294,"GO:0006294","nucleotide-excision repair, preincision complex assembly","2/120","23/12302",0.0208860784148303,0.0208860784148303,0.404339183957583,"DDB2/UBB",2
GO:0030970,"GO:0030970","retrograde protein transport, ER to cytosol","2/120","23/12302",0.0208860784148303,0.0208860784148303,0.404339183957583,"SVIP/VCP",2
GO:0090322,"GO:0090322","regulation of superoxide metabolic process","2/120","23/12302",0.0208860784148303,0.0208860784148303,0.404339183957583,"GNAI3/BMP7",2
GO:1902253,"GO:1902253","regulation of intrinsic apoptotic signaling pathway by p53 class mediator","2/120","23/12302",0.0208860784148303,0.0208860784148303,0.404339183957583,"UBB/ING2",2
GO:1903513,"GO:1903513","endoplasmic reticulum to cytosol transport","2/120","23/12302",0.0208860784148303,0.0208860784148303,0.404339183957583,"SVIP/VCP",2
GO:0072175,"GO:0072175","epithelial tube formation","4/120","108/12302",0.0212260181229075,0.0212260181229075,0.407377752540376,"RARG/BMP7/IFT122/CASP3",4
GO:0002696,"GO:0002696","positive regulation of leukocyte activation","6/120","224/12302",0.0223831927335885,0.0223831927335885,0.413171418799705,"NECTIN2/RIF1/PELI1/EGR3/GAS6/SHLD1",6
GO:0034644,"GO:0034644","cellular response to UV","3/120","62/12302",0.0225602438833041,0.0225602438833041,0.413171418799705,"CASP9/DDB2/MYC",3
GO:0007143,"GO:0007143","female meiotic nuclear division","2/120","24/12302",0.0226414030443905,0.0226414030443905,0.413171418799705,"UBB/PRKAR1A",2
GO:0010165,"GO:0010165","response to X-ray","2/120","24/12302",0.0226414030443905,0.0226414030443905,0.413171418799705,"NUCKS1/CASP3",2
GO:0060512,"GO:0060512","prostate gland morphogenesis","2/120","24/12302",0.0226414030443905,0.0226414030443905,0.413171418799705,"RARG/BMP7",2
GO:0071709,"GO:0071709","membrane assembly","2/120","24/12302",0.0226414030443905,0.0226414030443905,0.413171418799705,"TLCD1/LRP4",2
GO:0002824,"GO:0002824","positive regulation of adaptive immune response based on somatic recombination of immune receptors built from immunoglobulin superfamily domains","3/120","63/12302",0.0235236421847033,0.0235236421847033,0.419731008926755,"NECTIN2/RIF1/SHLD1",3
GO:0055072,"GO:0055072","iron ion homeostasis","3/120","63/12302",0.0235236421847033,0.0235236421847033,0.419731008926755,"CYBRD1/MYC/EIF2AK1",3
GO:0003091,"GO:0003091","renal water homeostasis","2/120","25/12302",0.0244554427898908,0.0244554427898908,0.419731008926755,"MYO5B/PRKAR1A",2
GO:0010800,"GO:0010800","positive regulation of peptidyl-threonine phosphorylation","2/120","25/12302",0.0244554427898908,0.0244554427898908,0.419731008926755,"BMP7/TNKS1BP1",2
GO:0046685,"GO:0046685","response to arsenic-containing substance","2/120","25/12302",0.0244554427898908,0.0244554427898908,0.419731008926755,"DDX3X/VCP",2
GO:2000781,"GO:2000781","positive regulation of double-strand break repair","2/120","25/12302",0.0244554427898908,0.0244554427898908,0.419731008926755,"RIF1/SHLD1",2
GO:0002708,"GO:0002708","positive regulation of lymphocyte mediated immunity","3/120","64/12302",0.0245091156512786,0.0245091156512786,0.419731008926755,"NECTIN2/RIF1/SHLD1",3
GO:0006303,"GO:0006303","double-strand break repair via nonhomologous end joining","3/120","64/12302",0.0245091156512786,0.0245091156512786,0.419731008926755,"RIF1/SHLD1/POLM",3
GO:0050867,"GO:0050867","positive regulation of cell activation","6/120","230/12302",0.0250839217586821,0.0250839217586821,0.426295657047912,"NECTIN2/RIF1/PELI1/EGR3/GAS6/SHLD1",6
GO:0043154,"GO:0043154","negative regulation of cysteine-type endopeptidase activity involved in apoptotic process","3/120","65/12302",0.025516653158534,0.025516653158534,0.427128780611788,"GPX1/DDX3X/GAS6",3
GO:2001021,"GO:2001021","negative regulation of response to DNA damage stimulus","3/120","65/12302",0.025516653158534,0.025516653158534,0.427128780611788,"RIF1/SHLD1/ING2",3
GO:0002694,"GO:0002694","regulation of leukocyte activation","8/120","364/12302",0.0260152014797365,0.0260152014797365,0.428263090096125,"NECTIN2/RIF1/PELI1/EGR3/GAS6/SHLD1/PRKAR1A/CASP3",8
GO:0070536,"GO:0070536","protein K63-linked deubiquitination","2/120","26/12302",0.0263269054559822,0.0263269054559822,0.428263090096125,"OTUD5/VCP",2
GO:1904837,"GO:1904837","beta-catenin-TCF complex assembly","2/120","26/12302",0.0263269054559822,0.0263269054559822,0.428263090096125,"MYC/BCL9",2
GO:0090305,"GO:0090305","nucleic acid phosphodiester bond hydrolysis","6/120","233/12302",0.0265127315606382,0.0265127315606382,0.428263090096125,"EXOSC9/ENDOV/DDB2/UBB/CASP3/HELZ2",6
GO:0002821,"GO:0002821","positive regulation of adaptive immune response","3/120","66/12302",0.0265462369321995,0.0265462369321995,0.428263090096125,"NECTIN2/RIF1/SHLD1",3
GO:0006401,"GO:0006401","RNA catabolic process","7/120","299/12302",0.0270661019875512,0.0270661019875512,0.433508562693456,"CNOT4/EXOSC9/NBAS/LARP1/UBB/TNKS1BP1/HELZ2",7
GO:2001056,"GO:2001056","positive regulation of cysteine-type endopeptidase activity","4/120","118/12302",0.0282429745213903,0.0282429745213903,0.441679330947717,"CASP9/MYC/DDX3X/VCP",4
GO:2000780,"GO:2000780","negative regulation of double-strand break repair","2/120","27/12302",0.0282545181000122,0.0282545181000122,0.441679330947717,"RIF1/SHLD1",2
GO:0022407,"GO:0022407","regulation of cell-cell adhesion","7/120","302/12302",0.028369804779786,0.028369804779786,0.441679330947717,"PELI1/EGR3/PTPN23/FOXA2/BMP7/PRKAR1A/CASP3",7
GO:0051249,"GO:0051249","regulation of lymphocyte activation","7/120","302/12302",0.028369804779786,0.028369804779786,0.441679330947717,"RIF1/PELI1/EGR3/GAS6/SHLD1/PRKAR1A/CASP3",7
GO:0000726,"GO:0000726","non-recombinational repair","3/120","69/12302",0.0297669919707644,0.0297669919707644,0.460213362705897,"RIF1/SHLD1/POLM",3
GO:0002639,"GO:0002639","positive regulation of immunoglobulin production","2/120","28/12302",0.0302370267845298,0.0302370267845298,0.461076507925598,"RIF1/SHLD1",2
GO:0044091,"GO:0044091","membrane biogenesis","2/120","28/12302",0.0302370267845298,0.0302370267845298,0.461076507925598,"TLCD1/LRP4",2
GO:2001020,"GO:2001020","regulation of response to DNA damage stimulus","5/120","179/12302",0.0307901207635883,0.0307901207635883,0.466316544325022,"RIF1/CASP9/MYC/SHLD1/ING2",5
GO:0016331,"GO:0016331","morphogenesis of embryonic epithelium","4/120","122/12302",0.0313933957294997,0.0313933957294997,0.469071225488463,"RARG/BMP7/IFT122/CASP3",4
GO:0035967,"GO:0035967","cellular response to topologically incorrect protein","4/120","122/12302",0.0313933957294997,0.0313933957294997,0.469071225488463,"TBL2/TPP1/DDIT3/VCP",4
GO:0009953,"GO:0009953","dorsal/ventral pattern formation","3/120","71/12302",0.0320237837352692,0.0320237837352692,0.469609977596885,"DDIT3/IFT122/LRP4",3
GO:0035148,"GO:0035148","tube formation","4/120","123/12302",0.032212072711122,0.032212072711122,0.469609977596885,"RARG/BMP7/IFT122/CASP3",4
GO:0045022,"GO:0045022","early endosome to late endosome transport","2/120","29/12302",0.0322731963327221,0.0322731963327221,0.469609977596885,"PTPN23/SNX3",2
GO:0045738,"GO:0045738","negative regulation of DNA repair","2/120","29/12302",0.0322731963327221,0.0322731963327221,0.469609977596885,"RIF1/SHLD1",2
GO:0060993,"GO:0060993","kidney morphogenesis","3/120","72/12302",0.0331849208551467,0.0331849208551467,0.472223705870578,"MYC/PRKX/BMP7",3
GO:2000117,"GO:2000117","negative regulation of cysteine-type endopeptidase activity","3/120","72/12302",0.0331849208551467,0.0331849208551467,0.472223705870578,"GPX1/DDX3X/GAS6",3
GO:0019827,"GO:0019827","stem cell population maintenance","4/120","125/12302",0.0338868692595873,0.0338868692595873,0.472223705870578,"RIF1/PCM1/BCL9/BMP7",4
GO:0035107,"GO:0035107","appendage morphogenesis","4/120","125/12302",0.0338868692595873,0.0338868692595873,0.472223705870578,"RARG/BMP7/IFT122/LRP4",4
GO:0035108,"GO:0035108","limb morphogenesis","4/120","125/12302",0.0338868692595873,0.0338868692595873,0.472223705870578,"RARG/BMP7/IFT122/LRP4",4
GO:0000289,"GO:0000289","nuclear-transcribed mRNA poly(A) tail shortening","2/120","30/12302",0.0343618100867527,0.0343618100867527,0.472223705870578,"CNOT4/TNKS1BP1",2
GO:0045911,"GO:0045911","positive regulation of DNA recombination","2/120","30/12302",0.0343618100867527,0.0343618100867527,0.472223705870578,"RIF1/SHLD1",2
GO:0046006,"GO:0046006","regulation of activated T cell proliferation","2/120","30/12302",0.0343618100867527,0.0343618100867527,0.472223705870578,"PRKAR1A/CASP3",2
GO:0048048,"GO:0048048","embryonic eye morphogenesis","2/120","30/12302",0.0343618100867527,0.0343618100867527,0.472223705870578,"RARG/BMP7",2
GO:0060562,"GO:0060562","epithelial tube morphogenesis","6/120","249/12302",0.0350489082400543,0.0350489082400543,0.474335912300226,"MYC/RARG/PRKX/BMP7/IFT122/CASP3",6
GO:0002377,"GO:0002377","immunoglobulin production","3/120","74/12302",0.03557237946043,0.03557237946043,0.474335912300226,"RIF1/SHLD1/POLM",3
GO:0016064,"GO:0016064","immunoglobulin mediated immune response","3/120","74/12302",0.03557237946043,0.03557237946043,0.474335912300226,"NECTIN2/RIF1/SHLD1",3
GO:0098727,"GO:0098727","maintenance of cell number","4/120","127/12302",0.0356117080283874,0.0356117080283874,0.474335912300226,"RIF1/PCM1/BCL9/BMP7",4
GO:0007140,"GO:0007140","male meiotic nuclear division","2/120","31/12302",0.0365016696689657,0.0365016696689657,0.474335912300226,"UBB/ING2",2
GO:0072604,"GO:0072604","interleukin-6 secretion","2/120","31/12302",0.0365016696689657,0.0365016696689657,0.474335912300226,"IL17RC/GAS6",2
GO:0019724,"GO:0019724","B cell mediated immunity","3/120","75/12302",0.0367985657380627,0.0367985657380627,0.474335912300226,"NECTIN2/RIF1/SHLD1",3
GO:0000187,"GO:0000187","activation of MAPK activity","4/120","129/12302",0.0373867036707853,0.0373867036707853,0.474335912300226,"AVPI1/MAP3K6/IQGAP3/UBB",4
GO:0001843,"GO:0001843","neural tube closure","3/120","76/12302",0.038046291338222,0.038046291338222,0.474335912300226,"RARG/IFT122/CASP3",3
GO:0060606,"GO:0060606","tube closure","3/120","76/12302",0.038046291338222,0.038046291338222,0.474335912300226,"RARG/IFT122/CASP3",3
GO:1901216,"GO:1901216","positive regulation of neuron death","3/120","76/12302",0.038046291338222,0.038046291338222,0.474335912300226,"CASP9/DDIT3/CASP3",3
GO:0006511,"GO:0006511","ubiquitin-dependent protein catabolic process","9/120","466/12302",0.0384602282053241,0.0384602282053241,0.474335912300226,"CNOT4/FBXO33/PELI1/SVIP/UBR4/PTPN23/DDIT3/UBB/VCP",9
GO:0002204,"GO:0002204","somatic recombination of immunoglobulin genes involved in immune response","2/120","32/12302",0.0386915947459267,0.0386915947459267,0.474335912300226,"RIF1/SHLD1",2
GO:0002208,"GO:0002208","somatic diversification of immunoglobulins involved in immune response","2/120","32/12302",0.0386915947459267,0.0386915947459267,0.474335912300226,"RIF1/SHLD1",2
GO:0006296,"GO:0006296","nucleotide-excision repair, DNA incision, 5'-to lesion","2/120","32/12302",0.0386915947459267,0.0386915947459267,0.474335912300226,"DDB2/UBB",2
GO:0031076,"GO:0031076","embryonic camera-type eye development","2/120","32/12302",0.0386915947459267,0.0386915947459267,0.474335912300226,"RARG/BMP7",2
GO:0045190,"GO:0045190","isotype switching","2/120","32/12302",0.0386915947459267,0.0386915947459267,0.474335912300226,"RIF1/SHLD1",2
GO:0045910,"GO:0045910","negative regulation of DNA recombination","2/120","32/12302",0.0386915947459267,0.0386915947459267,0.474335912300226,"RIF1/SHLD1",2
GO:0098927,"GO:0098927","vesicle-mediated transport between endosomal compartments","2/120","32/12302",0.0386915947459267,0.0386915947459267,0.474335912300226,"PTPN23/SNX3",2
GO:0031667,"GO:0031667","response to nutrient levels","8/120","394/12302",0.0388742593006885,0.0388742593006885,0.474335912300226,"TBL2/NUCB2/FOXA2/BMP7/DDIT3/GAS6/LARP1/EIF2AK1",8
GO:0033138,"GO:0033138","positive regulation of peptidyl-serine phosphorylation","3/120","77/12302",0.0393154760909389,0.0393154760909389,0.474335912300226,"GAS6/SH2D3A/TNKS1BP1",3
GO:0050865,"GO:0050865","regulation of cell activation","8/120","395/12302",0.0393650860656799,0.0393650860656799,0.474335912300226,"NECTIN2/RIF1/PELI1/EGR3/GAS6/SHLD1/PRKAR1A/CASP3",8
GO:0007050,"GO:0007050","cell cycle arrest","5/120","192/12302",0.0397850252167954,0.0397850252167954,0.474335912300226,"CNOT4/MYC/DDIT3/GAS6/TNKS1BP1",5
GO:0010970,"GO:0010970","transport along microtubule","4/120","132/12302",0.0401434148777989,0.0401434148777989,0.474335912300226,"MREG/PCM1/IFT122/UBB",4
GO:0099111,"GO:0099111","microtubule-based transport","4/120","132/12302",0.0401434148777989,0.0401434148777989,0.474335912300226,"MREG/PCM1/IFT122/UBB",4
GO:2001243,"GO:2001243","negative regulation of intrinsic apoptotic signaling pathway","3/120","78/12302",0.0406060350568983,0.0406060350568983,0.474335912300226,"GPX1/DDX3X/ING2",3
GO:0030835,"GO:0030835","negative regulation of actin filament depolymerization","2/120","33/12302",0.0409304227952665,0.0409304227952665,0.474335912300226,"PLEKHH2/CARMIL1",2
GO:0033683,"GO:0033683","nucleotide-excision repair, DNA incision","2/120","33/12302",0.0409304227952665,0.0409304227952665,0.474335912300226,"DDB2/UBB",2
GO:0090311,"GO:0090311","regulation of protein deacetylation","2/120","33/12302",0.0409304227952665,0.0409304227952665,0.474335912300226,"ZNHIT1/ING2",2
GO:0019941,"GO:0019941","modification-dependent protein catabolic process","9/120","472/12302",0.0411759920956571,0.0411759920956571,0.474335912300226,"CNOT4/FBXO33/PELI1/SVIP/UBR4/PTPN23/DDIT3/UBB/VCP",9
GO:0006413,"GO:0006413","translational initiation","4/120","134/12302",0.0420440993665553,0.0420440993665553,0.474335912300226,"DDX3X/EIF1/LARP1/EIF2AK1",4
GO:0006986,"GO:0006986","response to unfolded protein","4/120","134/12302",0.0420440993665553,0.0420440993665553,0.474335912300226,"TBL2/TPP1/DDIT3/VCP",4
GO:0051251,"GO:0051251","positive regulation of lymphocyte activation","5/120","195/12302",0.0420657498693316,0.0420657498693316,0.474335912300226,"RIF1/PELI1/EGR3/GAS6/SHLD1",5
GO:0050673,"GO:0050673","epithelial cell proliferation","7/120","330/12302",0.04263531006142,0.04263531006142,0.474335912300226,"MYC/NRAS/GPX1/PRKX/EGR3/IFT122/IQGAP3",7
GO:0010950,"GO:0010950","positive regulation of endopeptidase activity","4/120","135/12302",0.0430133101228087,0.0430133101228087,0.474335912300226,"CASP9/MYC/DDX3X/VCP",4
GO:0061136,"GO:0061136","regulation of proteasomal protein catabolic process","4/120","135/12302",0.0430133101228087,0.0430133101228087,0.474335912300226,"SVIP/GPX1/UBB/VCP",4
GO:0035735,"GO:0035735","intraciliary transport involved in cilium assembly","2/120","34/12302",0.0432170088752965,0.0432170088752965,0.474335912300226,"PCM1/IFT122",2
GO:0043403,"GO:0043403","skeletal muscle tissue regeneration","2/120","34/12302",0.0432170088752965,0.0432170088752965,0.474335912300226,"GPX1/BCL9",2
GO:0050798,"GO:0050798","activated T cell proliferation","2/120","34/12302",0.0432170088752965,0.0432170088752965,0.474335912300226,"PRKAR1A/CASP3",2
GO:0071470,"GO:0071470","cellular response to osmotic stress","2/120","34/12302",0.0432170088752965,0.0432170088752965,0.474335912300226,"DDX3X/CASP3",2
GO:0050868,"GO:0050868","negative regulation of T cell activation","3/120","80/12302",0.0432509128544202,0.0432509128544202,0.474335912300226,"PELI1/PRKAR1A/CASP3",3
GO:0021915,"GO:0021915","neural tube development","4/120","136/12302",0.0439950979450523,0.0439950979450523,0.480132260855447,"RARG/BMP7/IFT122/CASP3",4
GO:0046649,"GO:0046649","lymphocyte activation","9/120","480/12302",0.0449962440738572,0.0449962440738572,0.488662676334829,"RIF1/PELI1/DCAF1/EGR3/GAS6/SHLD1/PRKAR1A/CASP3/POLM",9
GO:0016447,"GO:0016447","somatic recombination of immunoglobulin gene segments","2/120","35/12302",0.0455502253973653,0.0455502253973653,0.492145890204057,"RIF1/SHLD1",2
GO:0001655,"GO:0001655","urogenital system development","6/120","266/12302",0.0458803144149428,0.0458803144149428,0.492145890204057,"CASP9/MYC/RARG/PRKX/BMP7/LRP4",6
GO:0071887,"GO:0071887","leukocyte apoptotic process","3/120","82/12302",0.0459801550375043,0.0459801550375043,0.492145890204057,"CASP9/GAS6/CASP3",3
GO:0071900,"GO:0071900","regulation of protein serine/threonine kinase activity","8/120","409/12302",0.0466781760476535,0.0466781760476535,0.494595131101073,"AVPI1/DDX3X/BMP7/MAP3K6/IQGAP3/UBB/PRKAR1A/CASP3",8
GO:0048524,"GO:0048524","positive regulation of viral process","3/120","83/12302",0.0473761536217674,0.0473761536217674,0.494595131101073,"NUCKS1/DDX3X/LARP1",3
GO:0006904,"GO:0006904","vesicle docking involved in exocytosis","2/120","36/12302",0.0479289619009245,0.0479289619009245,0.494595131101073,"RAB3B/CTBP2",2
GO:0010569,"GO:0010569","regulation of double-strand break repair via homologous recombination","2/120","36/12302",0.0479289619009245,0.0479289619009245,0.494595131101073,"RIF1/SHLD1",2
GO:0019985,"GO:0019985","translesion synthesis","2/120","36/12302",0.0479289619009245,0.0479289619009245,0.494595131101073,"UBB/VCP",2
GO:0032527,"GO:0032527","protein exit from endoplasmic reticulum","2/120","36/12302",0.0479289619009245,0.0479289619009245,0.494595131101073,"SVIP/VCP",2
GO:2000242,"GO:2000242","negative regulation of reproductive process","2/120","36/12302",0.0479289619009245,0.0479289619009245,0.494595131101073,"BMP7/PRKAR1A",2
GO:0032259,"GO:0032259","methylation","6/120","269/12302",0.0479862510174658,0.0479862510174658,0.494595131101073,"RIF1/EEF2KMT/MYC/RAB3B/MRM2/COMTD1",6
GO:0010948,"GO:0010948","negative regulation of cell cycle process","6/120","270/12302",0.0487013750186859,0.0487013750186859,0.498221024646294,"CNOT4/JADE1/CTDSP1/BMP7/TNKS1BP1/PRKAR1A",6
GO:0002705,"GO:0002705","positive regulation of leukocyte mediated immunity","3/120","85/12302",0.0502303522473805,0.0502303522473805,0.498221024646294,"NECTIN2/RIF1/SHLD1",3
GO:0003014,"GO:0003014","renal system process","3/120","85/12302",0.0502303522473805,0.0502303522473805,0.498221024646294,"MYO5B/GAS6/PRKAR1A",3
GO:2001022,"GO:2001022","positive regulation of response to DNA damage stimulus","3/120","85/12302",0.0502303522473805,0.0502303522473805,0.498221024646294,"RIF1/MYC/SHLD1",3
GO:0071824,"GO:0071824","protein-DNA complex subunit organization","5/120","205/12302",0.0502317555533073,0.0502317555533073,0.498221024646294,"DDB2/MYC/ZNHIT1/SOX12/UBB",5
GO:0009948,"GO:0009948","anterior/posterior axis specification","2/120","37/12302",0.0503521248312744,0.0503521248312744,0.498221024646294,"FOXA2/DDIT3",2
GO:0010799,"GO:0010799","regulation of peptidyl-threonine phosphorylation","2/120","37/12302",0.0503521248312744,0.0503521248312744,0.498221024646294,"BMP7/TNKS1BP1",2
GO:0044764,"GO:0044764","multi-organism cellular process","2/120","37/12302",0.0503521248312744,0.0503521248312744,0.498221024646294,"NECTIN2/GAS6",2
GO:0051646,"GO:0051646","mitochondrion localization","2/120","37/12302",0.0503521248312744,0.0503521248312744,0.498221024646294,"NECTIN2/UBB",2
GO:0009314,"GO:0009314","response to radiation","7/120","343/12302",0.0506075651593358,0.0506075651593358,0.498532837969238,"CASP9/DDB2/MYC/GPX1/NUCKS1/TNKS1BP1/CASP3",7
GO:0009991,"GO:0009991","response to extracellular stimulus","8/120","417/12302",0.0512342624559601,0.0512342624559601,0.502483028492259,"TBL2/NUCB2/FOXA2/BMP7/DDIT3/GAS6/LARP1/EIF2AK1",8
GO:0002440,"GO:0002440","production of molecular mediator of immune response","4/120","144/12302",0.0523013488706816,0.0523013488706816,0.506857613120291,"RIF1/GAS6/SHLD1/POLM",4
GO:0002381,"GO:0002381","immunoglobulin production involved in immunoglobulin mediated immune response","2/120","38/12302",0.0528186373199584,0.0528186373199584,0.506857613120291,"RIF1/SHLD1",2
GO:0010463,"GO:0010463","mesenchymal cell proliferation","2/120","38/12302",0.0528186373199584,0.0528186373199584,0.506857613120291,"MYC/BMP7",2
GO:0051187,"GO:0051187","cofactor catabolic process","2/120","38/12302",0.0528186373199584,0.0528186373199584,0.506857613120291,"GPX1/VCP",2
GO:0072523,"GO:0072523","purine-containing compound catabolic process","2/120","38/12302",0.0528186373199584,0.0528186373199584,0.506857613120291,"GPX1/DPYD",2
GO:0022406,"GO:0022406","membrane docking","4/120","145/12302",0.0533959478609689,0.0533959478609689,0.510198462732999,"RAB3B/PCM1/SNX3/CTBP2",4
GO:1905114,"GO:1905114","cell surface receptor signaling pathway involved in cell-cell signaling","9/120","497/12302",0.0538903338929555,0.0538903338929555,0.512721800196136,"JADE1/RARG/DDX3X/BCL9/DDIT3/SNX3/UBB/VCP/LRP4",9
GO:0006289,"GO:0006289","nucleotide-excision repair","3/120","88/12302",0.054665379884866,0.054665379884866,0.517882546277678,"DDB2/COPS7A/UBB",3
GO:0030850,"GO:0030850","prostate gland development","2/120","39/12302",0.0553274389677766,0.0553274389677766,0.519140625821957,"RARG/BMP7",2
GO:2000772,"GO:2000772","regulation of cellular senescence","2/120","39/12302",0.0553274389677766,0.0553274389677766,0.519140625821957,"NUAK1/ING2",2
GO:0072331,"GO:0072331","signal transduction by p53 class mediator","5/120","211/12302",0.0555500116813229,0.0555500116813229,0.519140625821957,"CNOT4/NUAK1/UBB/TNKS1BP1/ING2",5
GO:0007569,"GO:0007569","cell aging","3/120","90/12302",0.057723089089187,0.057723089089187,0.519140625821957,"NUAK1/MNT/ING2",3
GO:0071482,"GO:0071482","cellular response to light stimulus","3/120","90/12302",0.057723089089187,0.057723089089187,0.519140625821957,"CASP9/DDB2/MYC",3
GO:0002637,"GO:0002637","regulation of immunoglobulin production","2/120","40/12302",0.0578774856303887,0.0578774856303887,0.519140625821957,"RIF1/SHLD1",2
GO:0036297,"GO:0036297","interstrand cross-link repair","2/120","40/12302",0.0578774856303887,0.0578774856303887,0.519140625821957,"NUCKS1/UBB",2
GO:0048736,"GO:0048736","appendage development","4/120","149/12302",0.0578987272538493,0.0578987272538493,0.519140625821957,"RARG/BMP7/IFT122/LRP4",4
GO:0060173,"GO:0060173","limb development","4/120","149/12302",0.0578987272538493,0.0578987272538493,0.519140625821957,"RARG/BMP7/IFT122/LRP4",4
GO:0006310,"GO:0006310","DNA recombination","5/120","214/12302",0.0583271811517977,0.0583271811517977,0.519140625821957,"RIF1/DCAF1/NUCKS1/SHLD1/POLM",5
GO:0032147,"GO:0032147","activation of protein kinase activity","6/120","283/12302",0.0586005922226804,0.0586005922226804,0.519140625821957,"AVPI1/MAP3K6/GAS6/IQGAP3/UBB/PRKAR1A",6
GO:0071456,"GO:0071456","cellular response to hypoxia","4/120","150/12302",0.0590554006422812,0.0590554006422812,0.519140625821957,"TBL2/MYC/BMP7/UBB",4
GO:0032508,"GO:0032508","DNA duplex unwinding","3/120","91/12302",0.0592818548859238,0.0592818548859238,0.519140625821957,"DDB2/DDX3X/UBB",3
GO:0050678,"GO:0050678","regulation of epithelial cell proliferation","6/120","284/12302",0.0594086566227208,0.0594086566227208,0.519140625821957,"MYC/NRAS/GPX1/EGR3/IFT122/IQGAP3",6
GO:0030308,"GO:0030308","negative regulation of cell growth","4/120","151/12302",0.0602244129576442,0.0602244129576442,0.519140625821957,"JADE1/ING1/DDX3X/GNG4",4
GO:0035966,"GO:0035966","response to topologically incorrect protein","4/120","151/12302",0.0602244129576442,0.0602244129576442,0.519140625821957,"TBL2/TPP1/DDIT3/VCP",4
GO:0031529,"GO:0031529","ruffle organization","2/120","41/12302",0.0604677492064784,0.0604677492064784,0.519140625821957,"ARFIP2/CARMIL1",2
GO:0048146,"GO:0048146","positive regulation of fibroblast proliferation","2/120","41/12302",0.0604677492064784,0.0604677492064784,0.519140625821957,"MYC/GAS6",2
GO:1902373,"GO:1902373","negative regulation of mRNA catabolic process","2/120","41/12302",0.0604677492064784,0.0604677492064784,0.519140625821957,"NBAS/LARP1",2
GO:0046718,"GO:0046718","viral entry into host cell","3/120","92/12302",0.0608603781483919,0.0608603781483919,0.519140625821957,"NECTIN2/SNX3/GAS6",3
GO:0010952,"GO:0010952","positive regulation of peptidase activity","4/120","153/12302",0.0625993369631615,0.0625993369631615,0.519140625821957,"CASP9/MYC/DDX3X/VCP",4
GO:0030111,"GO:0030111","regulation of Wnt signaling pathway","6/120","288/12302",0.0627077304702749,0.0627077304702749,0.519140625821957,"JADE1/DDX3X/DDIT3/SNX3/VCP/LRP4",6
GO:0030834,"GO:0030834","regulation of actin filament depolymerization","2/120","42/12302",0.0630972174284481,0.0630972174284481,0.519140625821957,"PLEKHH2/CARMIL1",2
GO:0043113,"GO:0043113","receptor clustering","2/120","42/12302",0.0630972174284481,0.0630972174284481,0.519140625821957,"IFT122/LRP4",2
GO:0043954,"GO:0043954","cellular component maintenance","2/120","42/12302",0.0630972174284481,0.0630972174284481,0.519140625821957,"PKP2/CTBP2",2
GO:0032535,"GO:0032535","regulation of cellular component size","6/120","290/12302",0.06439738636612,0.06439738636612,0.519140625821957,"PLEKHH2/RAB3B/MYO1C/RARG/IQGAP3/CARMIL1",6
GO:0043254,"GO:0043254","regulation of protein complex assembly","7/120","363/12302",0.0646186326099365,0.0646186326099365,0.519140625821957,"BBS10/SVIP/DDB2/MYO1C/DDX3X/VCP/CARMIL1",7
GO:0061013,"GO:0061013","regulation of mRNA catabolic process","4/120","155/12302",0.0650232493235137,0.0650232493235137,0.519140625821957,"EXOSC9/NBAS/LARP1/UBB",4
GO:0002706,"GO:0002706","regulation of lymphocyte mediated immunity","3/120","95/12302",0.0657130666413465,0.0657130666413465,0.519140625821957,"NECTIN2/RIF1/SHLD1",3
GO:1903038,"GO:1903038","negative regulation of leukocyte cell-cell adhesion","3/120","95/12302",0.0657130666413465,0.0657130666413465,0.519140625821957,"PELI1/PRKAR1A/CASP3",3
GO:0010332,"GO:0010332","response to gamma radiation","2/120","43/12302",0.0657648936556165,0.0657648936556165,0.519140625821957,"MYC/GPX1",2
GO:0034976,"GO:0034976","response to endoplasmic reticulum stress","5/120","223/12302",0.0671301031286254,0.0671301031286254,0.519140625821957,"TBL2/SVIP/TPP1/DDIT3/VCP",5
GO:0010498,"GO:0010498","proteasomal protein catabolic process","7/120","368/12302",0.0684573192142548,0.0684573192142548,0.519140625821957,"FBXO33/PELI1/SVIP/GPX1/DDIT3/UBB/VCP",7
GO:0048871,"GO:0048871","multicellular organismal homeostasis","7/120","368/12302",0.0684573192142548,0.0684573192142548,0.519140625821957,"MYO5B/BBS10/TPP1/GPX1/DDIT3/UBB/PRKAR1A",7
GO:0000731,"GO:0000731","DNA synthesis involved in DNA repair","2/120","44/12302",0.0684697966698923,0.0684697966698923,0.519140625821957,"UBB/VCP",2
GO:0030042,"GO:0030042","actin filament depolymerization","2/120","44/12302",0.0684697966698923,0.0684697966698923,0.519140625821957,"PLEKHH2/CARMIL1",2
GO:0030888,"GO:0030888","regulation of B cell proliferation","2/120","44/12302",0.0684697966698923,0.0684697966698923,0.519140625821957,"PELI1/CASP3",2
GO:0042073,"GO:0042073","intraciliary transport","2/120","44/12302",0.0684697966698923,0.0684697966698923,0.519140625821957,"PCM1/IFT122",2
GO:0051784,"GO:0051784","negative regulation of nuclear division","2/120","44/12302",0.0684697966698923,0.0684697966698923,0.519140625821957,"BMP7/PRKAR1A",2
GO:1903050,"GO:1903050","regulation of proteolysis involved in cellular protein catabolic process","4/120","158/12302",0.0687503659453499,0.0687503659453499,0.519140625821957,"SVIP/GPX1/UBB/VCP",4
GO:0055076,"GO:0055076","transition metal ion homeostasis","3/120","97/12302",0.0690443172631581,0.0690443172631581,0.519140625821957,"CYBRD1/MYC/EIF2AK1",3
GO:0052548,"GO:0052548","regulation of endopeptidase activity","6/120","296/12302",0.069626886620065,0.069626886620065,0.519140625821957,"CASP9/MYC/GPX1/DDX3X/GAS6/VCP",6
GO:0036294,"GO:0036294","cellular response to decreased oxygen levels","4/120","159/12302",0.0700169211425885,0.0700169211425885,0.519140625821957,"TBL2/MYC/BMP7/UBB",4
GO:0043414,"GO:0043414","macromolecule methylation","5/120","226/12302",0.0702209610414785,0.0702209610414785,0.519140625821957,"RIF1/EEF2KMT/MYC/RAB3B/MRM2",5
GO:0002822,"GO:0002822","regulation of adaptive immune response based on somatic recombination of immune receptors built from immunoglobulin superfamily domains","3/120","98/12302",0.0707383243467977,0.0707383243467977,0.519140625821957,"NECTIN2/RIF1/SHLD1",3
GO:0006301,"GO:0006301","postreplication repair","2/120","45/12302",0.0712109604738921,0.0712109604738921,0.519140625821957,"UBB/VCP",2
GO:0034113,"GO:0034113","heterotypic cell-cell adhesion","2/120","45/12302",0.0712109604738921,0.0712109604738921,0.519140625821957,"PKP2/BMP7",2
GO:0090342,"GO:0090342","regulation of cell aging","2/120","45/12302",0.0712109604738921,0.0712109604738921,0.519140625821957,"NUAK1/ING2",2
GO:1902369,"GO:1902369","negative regulation of RNA catabolic process","2/120","45/12302",0.0712109604738921,0.0712109604738921,0.519140625821957,"NBAS/LARP1",2
GO:0030522,"GO:0030522","intracellular receptor signaling pathway","5/120","227/12302",0.0712685578958507,0.0712685578958507,0.519140625821957,"RARG/CREM/CTBP2/ESRRA/UBB",5
GO:0060828,"GO:0060828","regulation of canonical Wnt signaling pathway","5/120","227/12302",0.0712685578958507,0.0712685578958507,0.519140625821957,"JADE1/DDX3X/DDIT3/VCP/LRP4",5
GO:0001822,"GO:0001822","kidney development","5/120","228/12302",0.0723247896506241,0.0723247896506241,0.519140625821957,"CASP9/MYC/PRKX/BMP7/LRP4",5
GO:0035924,"GO:0035924","cellular response to vascular endothelial growth factor stimulus","2/120","46/12302",0.0739874340914799,0.0739874340914799,0.519140625821957,"MYO1C/EGR3",2
GO:0032392,"GO:0032392","DNA geometric change","3/120","100/12302",0.0741823184997293,0.0741823184997293,0.519140625821957,"DDB2/DDX3X/UBB",3
GO:0051250,"GO:0051250","negative regulation of lymphocyte activation","3/120","100/12302",0.0741823184997293,0.0741823184997293,0.519140625821957,"PELI1/PRKAR1A/CASP3",3
GO:0010508,"GO:0010508","positive regulation of autophagy","3/120","101/12302",0.0759319854369194,0.0759319854369194,0.519140625821957,"GNAI3/SVIP/LARP1",3
GO:0071901,"GO:0071901","negative regulation of protein serine/threonine kinase activity","3/120","101/12302",0.0759319854369194,0.0759319854369194,0.519140625821957,"BMP7/PRKAR1A/CASP3",3
GO:0044772,"GO:0044772","mitotic cell cycle phase transition","8/120","455/12302",0.076757410543515,0.076757410543515,0.519140625821957,"CNOT4/JADE1/MYC/PCM1/DDX3X/CTDSP1/IQGAP3/TNKS1BP1",8
GO:0006879,"GO:0006879","cellular iron ion homeostasis","2/120","47/12302",0.0767982813706951,0.0767982813706951,0.519140625821957,"CYBRD1/MYC",2
GO:0072132,"GO:0072132","mesenchyme morphogenesis","2/120","47/12302",0.0767982813706951,0.0767982813706951,0.519140625821957,"MYC/BMP7",2
GO:0043900,"GO:0043900","regulation of multi-organism process","6/120","306/12302",0.078876909577807,0.078876909577807,0.519140625821957,"NECTIN2/FAM111A/NUCKS1/DDX3X/SNX3/LARP1",6
GO:0002521,"GO:0002521","leukocyte differentiation","7/120","381/12302",0.0790710331984333,0.0790710331984333,0.519140625821957,"MYC/DCAF1/EGR3/GAS6/ESRRA/EIF2AK1/POLM",7
GO:0000724,"GO:0000724","double-strand break repair via homologous recombination","3/120","103/12302",0.0794858430072996,0.0794858430072996,0.519140625821957,"RIF1/NUCKS1/SHLD1",3
GO:0000725,"GO:0000725","recombinational repair","3/120","103/12302",0.0794858430072996,0.0794858430072996,0.519140625821957,"RIF1/NUCKS1/SHLD1",3
GO:0033135,"GO:0033135","regulation of peptidyl-serine phosphorylation","3/120","103/12302",0.0794858430072996,0.0794858430072996,0.519140625821957,"GAS6/SH2D3A/TNKS1BP1",3
GO:0006801,"GO:0006801","superoxide metabolic process","2/120","48/12302",0.0796425807890484,0.0796425807890484,0.519140625821957,"GNAI3/BMP7",2
GO:0006977,"GO:0006977","DNA damage response, signal transduction by p53 class mediator resulting in cell cycle arrest","2/120","48/12302",0.0796425807890484,0.0796425807890484,0.519140625821957,"CNOT4/TNKS1BP1",2
GO:0050891,"GO:0050891","multicellular organismal water homeostasis","2/120","48/12302",0.0796425807890484,0.0796425807890484,0.519140625821957,"MYO5B/PRKAR1A",2
GO:0050679,"GO:0050679","positive regulation of epithelial cell proliferation","4/120","167/12302",0.0805785691757797,0.0805785691757797,0.519140625821957,"MYC/NRAS/EGR3/IQGAP3",4
GO:0030260,"GO:0030260","entry into host cell","3/120","104/12302",0.0812897013172409,0.0812897013172409,0.519140625821957,"NECTIN2/SNX3/GAS6",3
GO:0031333,"GO:0031333","negative regulation of protein complex assembly","3/120","104/12302",0.0812897013172409,0.0812897013172409,0.519140625821957,"SVIP/DDX3X/CARMIL1",3
GO:0044409,"GO:0044409","entry into host","3/120","104/12302",0.0812897013172409,0.0812897013172409,0.519140625821957,"NECTIN2/SNX3/GAS6",3
GO:0051806,"GO:0051806","entry into cell of other organism involved in symbiotic interaction","3/120","104/12302",0.0812897013172409,0.0812897013172409,0.519140625821957,"NECTIN2/SNX3/GAS6",3
GO:0051828,"GO:0051828","entry into other organism involved in symbiotic interaction","3/120","104/12302",0.0812897013172409,0.0812897013172409,0.519140625821957,"NECTIN2/SNX3/GAS6",3
GO:0072431,"GO:0072431","signal transduction involved in mitotic G1 DNA damage checkpoint","2/120","49/12302",0.0825194252611522,0.0825194252611522,0.519140625821957,"CNOT4/TNKS1BP1",2
GO:1902400,"GO:1902400","intracellular signal transduction involved in G1 DNA damage checkpoint","2/120","49/12302",0.0825194252611522,0.0825194252611522,0.519140625821957,"CNOT4/TNKS1BP1",2
GO:2001244,"GO:2001244","positive regulation of intrinsic apoptotic signaling pathway","2/120","49/12302",0.0825194252611522,0.0825194252611522,0.519140625821957,"DDIT3/UBB",2
GO:1903322,"GO:1903322","positive regulation of protein modification by small protein conjugation or removal","3/120","105/12302",0.0831112880071272,0.0831112880071272,0.519140625821957,"PELI1/UBB/VCP",3
GO:0072001,"GO:0072001","renal system development","5/120","239/12302",0.0845088730635477,0.0845088730635477,0.519140625821957,"CASP9/MYC/PRKX/BMP7/LRP4",5
GO:0071453,"GO:0071453","cellular response to oxygen levels","4/120","170/12302",0.0847327933880054,0.0847327933880054,0.519140625821957,"TBL2/MYC/BMP7/UBB",4
GO:0002819,"GO:0002819","regulation of adaptive immune response","3/120","106/12302",0.084950432407152,0.084950432407152,0.519140625821957,"NECTIN2/RIF1/SHLD1",3
GO:0002312,"GO:0002312","B cell activation involved in immune response","2/120","50/12302",0.0854279219486641,0.0854279219486641,0.519140625821957,"RIF1/SHLD1",2
GO:1901880,"GO:1901880","negative regulation of protein depolymerization","2/120","50/12302",0.0854279219486641,0.0854279219486641,0.519140625821957,"PLEKHH2/CARMIL1",2
GO:0032388,"GO:0032388","positive regulation of intracellular transport","4/120","171/12302",0.0861405925472179,0.0861405925472179,0.519140625821957,"MYO1C/PCM1/PTPN23/GAS6",4
GO:0018107,"GO:0018107","peptidyl-threonine phosphorylation","3/120","107/12302",0.0868069621899603,0.0868069621899603,0.519140625821957,"DCAF1/BMP7/TNKS1BP1",3
GO:0042129,"GO:0042129","regulation of T cell proliferation","3/120","107/12302",0.0868069621899603,0.0868069621899603,0.519140625821957,"PELI1/PRKAR1A/CASP3",3
GO:0009416,"GO:0009416","response to light stimulus","5/120","241/12302",0.0868344638806747,0.0868344638806747,0.519140625821957,"CASP9/DDB2/MYC/GPX1/CASP3",5
GO:0016197,"GO:0016197","endosomal transport","4/120","172/12302",0.0875598288208474,0.0875598288208474,0.519140625821957,"MYO5B/PTPN23/UBB/VCP",4
GO:0061180,"GO:0061180","mammary gland epithelium development","2/120","51/12302",0.0883671920725147,0.0883671920725147,0.519140625821957,"GPX1/IQGAP3",2
GO:0072413,"GO:0072413","signal transduction involved in mitotic cell cycle checkpoint","2/120","51/12302",0.0883671920725147,0.0883671920725147,0.519140625821957,"CNOT4/TNKS1BP1",2
GO:1902402,"GO:1902402","signal transduction involved in mitotic DNA damage checkpoint","2/120","51/12302",0.0883671920725147,0.0883671920725147,0.519140625821957,"CNOT4/TNKS1BP1",2
GO:1902403,"GO:1902403","signal transduction involved in mitotic DNA integrity checkpoint","2/120","51/12302",0.0883671920725147,0.0883671920725147,0.519140625821957,"CNOT4/TNKS1BP1",2
GO:0052547,"GO:0052547","regulation of peptidase activity","6/120","317/12302",0.0898178153199571,0.0898178153199571,0.519140625821957,"CASP9/MYC/GPX1/DDX3X/GAS6/VCP",6
GO:0051961,"GO:0051961","negative regulation of nervous system development","5/120","244/12302",0.0903856491459188,0.0903856491459188,0.519140625821957,"PCM1/CTDSP1/BMP7/IFT122/LRP4",5
GO:0030032,"GO:0030032","lamellipodium assembly","2/120","52/12302",0.0913363707273946,0.0913363707273946,0.519140625821957,"ARFIP2/CARMIL1",2
GO:0007159,"GO:0007159","leukocyte cell-cell adhesion","5/120","246/12302",0.0927946924310694,0.0927946924310694,0.519140625821957,"PELI1/EGR3/BMP7/PRKAR1A/CASP3",5
GO:0002934,"GO:0002934","desmosome organization","1/120","10/12302",0.0934055255423264,0.0934055255423264,0.519140625821957,"PKP2",1
GO:0003093,"GO:0003093","regulation of glomerular filtration","1/120","10/12302",0.0934055255423264,0.0934055255423264,0.519140625821957,"GAS6",1
GO:0006048,"GO:0006048","UDP-N-acetylglucosamine biosynthetic process","1/120","10/12302",0.0934055255423264,0.0934055255423264,0.519140625821957,"GNPNAT1",1
GO:0010172,"GO:0010172","embryonic body morphogenesis","1/120","10/12302",0.0934055255423264,0.0934055255423264,0.519140625821957,"IFT122",1
GO:0010269,"GO:0010269","response to selenium ion","1/120","10/12302",0.0934055255423264,0.0934055255423264,0.519140625821957,"GPX1",1
GO:0010998,"GO:0010998","regulation of translational initiation by eIF2 alpha phosphorylation","1/120","10/12302",0.0934055255423264,0.0934055255423264,0.519140625821957,"EIF2AK1",1
GO:0015697,"GO:0015697","quaternary ammonium group transport","1/120","10/12302",0.0934055255423264,0.0934055255423264,0.519140625821957,"SLC22A4",1
GO:0018206,"GO:0018206","peptidyl-methionine modification","1/120","10/12302",0.0934055255423264,0.0934055255423264,0.519140625821957,"NAA20",1
GO:0030889,"GO:0030889","negative regulation of B cell proliferation","1/120","10/12302",0.0934055255423264,0.0934055255423264,0.519140625821957,"CASP3",1
GO:0031507,"GO:0031507","heterochromatin assembly","1/120","10/12302",0.0934055255423264,0.0934055255423264,0.519140625821957,"BAHD1",1
GO:0032096,"GO:0032096","negative regulation of response to food","1/120","10/12302",0.0934055255423264,0.0934055255423264,0.519140625821957,"NUCB2",1
GO:0032099,"GO:0032099","negative regulation of appetite","1/120","10/12302",0.0934055255423264,0.0934055255423264,0.519140625821957,"NUCB2",1
GO:0035721,"GO:0035721","intraciliary retrograde transport","1/120","10/12302",0.0934055255423264,0.0934055255423264,0.519140625821957,"IFT122",1
GO:0046415,"GO:0046415","urate metabolic process","1/120","10/12302",0.0934055255423264,0.0934055255423264,0.519140625821957,"CARMIL1",1
GO:0051409,"GO:0051409","response to nitrosative stress","1/120","10/12302",0.0934055255423264,0.0934055255423264,0.519140625821957,"DDIT3",1
GO:0060272,"GO:0060272","embryonic skeletal joint morphogenesis","1/120","10/12302",0.0934055255423264,0.0934055255423264,0.519140625821957,"BMP7",1
GO:0061307,"GO:0061307","cardiac neural crest cell differentiation involved in heart development","1/120","10/12302",0.0934055255423264,0.0934055255423264,0.519140625821957,"BMP7",1
GO:0061308,"GO:0061308","cardiac neural crest cell development involved in heart development","1/120","10/12302",0.0934055255423264,0.0934055255423264,0.519140625821957,"BMP7",1
GO:0070914,"GO:0070914","UV-damage excision repair","1/120","10/12302",0.0934055255423264,0.0934055255423264,0.519140625821957,"DDB2",1
GO:0072393,"GO:0072393","microtubule anchoring at microtubule organizing center","1/120","10/12302",0.0934055255423264,0.0934055255423264,0.519140625821957,"PCM1",1
GO:0090085,"GO:0090085","regulation of protein deubiquitination","1/120","10/12302",0.0934055255423264,0.0934055255423264,0.519140625821957,"VCP",1
GO:0090493,"GO:0090493","catecholamine uptake","1/120","10/12302",0.0934055255423264,0.0934055255423264,0.519140625821957,"RAB3B",1
GO:0099558,"GO:0099558","maintenance of synapse structure","1/120","10/12302",0.0934055255423264,0.0934055255423264,0.519140625821957,"CTBP2",1
GO:1901626,"GO:1901626","regulation of postsynaptic membrane organization","1/120","10/12302",0.0934055255423264,0.0934055255423264,0.519140625821957,"LRP4",1
GO:1903025,"GO:1903025","regulation of RNA polymerase II regulatory region sequence-specific DNA binding","1/120","10/12302",0.0934055255423264,0.0934055255423264,0.519140625821957,"DDIT3",1
GO:1903651,"GO:1903651","positive regulation of cytoplasmic transport","1/120","10/12302",0.0934055255423264,0.0934055255423264,0.519140625821957,"PTPN23",1
GO:1904293,"GO:1904293","negative regulation of ERAD pathway","1/120","10/12302",0.0934055255423264,0.0934055255423264,0.519140625821957,"SVIP",1
GO:1905214,"GO:1905214","regulation of RNA binding","1/120","10/12302",0.0934055255423264,0.0934055255423264,0.519140625821957,"NUCKS1",1
GO:1990440,"GO:1990440","positive regulation of transcription from RNA polymerase II promoter in response to endoplasmic reticulum stress","1/120","10/12302",0.0934055255423264,0.0934055255423264,0.519140625821957,"DDIT3",1
GO:0090066,"GO:0090066","regulation of anatomical structure size","7/120","398/12302",0.0943271254477894,0.0943271254477894,0.519140625821957,"PLEKHH2/RAB3B/GPX1/MYO1C/RARG/IQGAP3/CARMIL1",7
GO:0030104,"GO:0030104","water homeostasis","2/120","53/12302",0.0943346066984744,0.0943346066984744,0.519140625821957,"MYO5B/PRKAR1A",2
GO:0032387,"GO:0032387","negative regulation of intracellular transport","2/120","53/12302",0.0943346066984744,0.0943346066984744,0.519140625821957,"SVIP/SNX3",2
GO:0048278,"GO:0048278","vesicle docking","2/120","53/12302",0.0943346066984744,0.0943346066984744,0.519140625821957,"RAB3B/CTBP2",2
GO:0006513,"GO:0006513","protein monoubiquitination","2/120","54/12302",0.0973610622803334,0.0973610622803334,0.519140625821957,"DDB2/UBB",2
GO:0031571,"GO:0031571","mitotic G1 DNA damage checkpoint","2/120","54/12302",0.0973610622803334,0.0973610622803334,0.519140625821957,"CNOT4/TNKS1BP1",2
GO:0042733,"GO:0042733","embryonic digit morphogenesis","2/120","54/12302",0.0973610622803334,0.0973610622803334,0.519140625821957,"IFT122/LRP4",2
GO:0044819,"GO:0044819","mitotic G1/S transition checkpoint","2/120","54/12302",0.0973610622803334,0.0973610622803334,0.519140625821957,"CNOT4/TNKS1BP1",2
GO:0071479,"GO:0071479","cellular response to ionizing radiation","2/120","54/12302",0.0973610622803334,0.0973610622803334,0.519140625821957,"NUCKS1/TNKS1BP1",2
GO:0033157,"GO:0033157","regulation of intracellular protein transport","4/120","179/12302",0.0978098188882008,0.0978098188882008,0.519140625821957,"SVIP/MYO1C/PCM1/GAS6",4
GO:0018210,"GO:0018210","peptidyl-threonine modification","3/120","113/12302",0.0983013941537851,0.0983013941537851,0.519140625821957,"DCAF1/BMP7/TNKS1BP1",3
GO:0031056,"GO:0031056","regulation of histone modification","3/120","114/12302",0.100274673270121,0.100274673270121,0.519140625821957,"RIF1/ZNHIT1/ING2",3
GO:0044783,"GO:0044783","G1 DNA damage checkpoint","2/120","55/12302",0.100414913098071,0.100414913098071,0.519140625821957,"CNOT4/TNKS1BP1",2
GO:0043161,"GO:0043161","proteasome-mediated ubiquitin-dependent protein catabolic process","6/120","327/12302",0.100450414671554,0.100450414671554,0.519140625821957,"FBXO33/PELI1/SVIP/DDIT3/UBB/VCP",6
GO:0016081,"GO:0016081","synaptic vesicle docking","1/120","11/12302",0.102256106158575,0.102256106158575,0.519140625821957,"CTBP2",1
GO:0016446,"GO:0016446","somatic hypermutation of immunoglobulin genes","1/120","11/12302",0.102256106158575,0.102256106158575,0.519140625821957,"POLM",1
GO:0019372,"GO:0019372","lipoxygenase pathway","1/120","11/12302",0.102256106158575,0.102256106158575,0.519140625821957,"GPX1",1
GO:0020027,"GO:0020027","hemoglobin metabolic process","1/120","11/12302",0.102256106158575,0.102256106158575,0.519140625821957,"EIF2AK1",1
GO:0034331,"GO:0034331","cell junction maintenance","1/120","11/12302",0.102256106158575,0.102256106158575,0.519140625821957,"PKP2",1
GO:0043247,"GO:0043247","telomere maintenance in response to DNA damage","1/120","11/12302",0.102256106158575,0.102256106158575,0.519140625821957,"RIF1",1
GO:0045655,"GO:0045655","regulation of monocyte differentiation","1/120","11/12302",0.102256106158575,0.102256106158575,0.519140625821957,"MYC",1
GO:0050746,"GO:0050746","regulation of lipoprotein metabolic process","1/120","11/12302",0.102256106158575,0.102256106158575,0.519140625821957,"SVIP",1
GO:0050862,"GO:0050862","positive regulation of T cell receptor signaling pathway","1/120","11/12302",0.102256106158575,0.102256106158575,0.519140625821957,"NECTIN2",1
GO:0060442,"GO:0060442","branching involved in prostate gland morphogenesis","1/120","11/12302",0.102256106158575,0.102256106158575,0.519140625821957,"BMP7",1
GO:0060601,"GO:0060601","lateral sprouting from an epithelium","1/120","11/12302",0.102256106158575,0.102256106158575,0.519140625821957,"BMP7",1
GO:0070486,"GO:0070486","leukocyte aggregation","1/120","11/12302",0.102256106158575,0.102256106158575,0.519140625821957,"BMP7",1
GO:0071027,"GO:0071027","nuclear RNA surveillance","1/120","11/12302",0.102256106158575,0.102256106158575,0.519140625821957,"EXOSC9",1
GO:0071028,"GO:0071028","nuclear mRNA surveillance","1/120","11/12302",0.102256106158575,0.102256106158575,0.519140625821957,"EXOSC9",1
GO:0072216,"GO:0072216","positive regulation of metanephros development","1/120","11/12302",0.102256106158575,0.102256106158575,0.519140625821957,"MYC",1
GO:1902166,"GO:1902166","negative regulation of intrinsic apoptotic signaling pathway in response to DNA damage by p53 class mediator","1/120","11/12302",0.102256106158575,0.102256106158575,0.519140625821957,"ING2",1
GO:1902337,"GO:1902337","regulation of apoptotic process involved in morphogenesis","1/120","11/12302",0.102256106158575,0.102256106158575,0.519140625821957,"BMP7",1
GO:1904748,"GO:1904748","regulation of apoptotic process involved in development","1/120","11/12302",0.102256106158575,0.102256106158575,0.519140625821957,"BMP7",1
GO:2001053,"GO:2001053","regulation of mesenchymal cell apoptotic process","1/120","11/12302",0.102256106158575,0.102256106158575,0.519140625821957,"BMP7",1
GO:0042770,"GO:0042770","signal transduction in response to DNA damage","3/120","115/12302",0.102263908548611,0.102263908548611,0.519140625821957,"CNOT4/CASP9/TNKS1BP1",3
GO:0045930,"GO:0045930","negative regulation of mitotic cell cycle","5/120","254/12302",0.102758986414788,0.102758986414788,0.519140625821957,"CNOT4/JADE1/CTDSP1/BMP7/TNKS1BP1",5
GO:0031670,"GO:0031670","cellular response to nutrient","2/120","56/12302",0.103495347930575,0.103495347930575,0.519140625821957,"FOXA2/GAS6",2
GO:0045739,"GO:0045739","positive regulation of DNA repair","2/120","56/12302",0.103495347930575,0.103495347930575,0.519140625821957,"RIF1/SHLD1",2
GO:0097191,"GO:0097191","extrinsic apoptotic signaling pathway","4/120","183/12302",0.103909286203139,0.103909286203139,0.519140625821957,"CASP9/GPX1/DDX3X/CASP3",4
GO:0044770,"GO:0044770","cell cycle phase transition","8/120","488/12302",0.104224924704948,0.104224924704948,0.519140625821957,"CNOT4/JADE1/MYC/PCM1/DDX3X/CTDSP1/IQGAP3/TNKS1BP1",8
GO:0022409,"GO:0022409","positive regulation of cell-cell adhesion","4/120","184/12302",0.105461041045462,0.105461041045462,0.519140625821957,"EGR3/PTPN23/FOXA2/BMP7",4
GO:0034250,"GO:0034250","positive regulation of cellular amide metabolic process","3/120","117/12302",0.106289511015815,0.106289511015815,0.519140625821957,"DDX3X/LARP1/CASP3",3
GO:0090501,"GO:0090501","RNA phosphodiester bond hydrolysis","3/120","117/12302",0.106289511015815,0.106289511015815,0.519140625821957,"EXOSC9/ENDOV/HELZ2",3
GO:0035019,"GO:0035019","somatic stem cell population maintenance","2/120","57/12302",0.106601568535926,0.106601568535926,0.519140625821957,"BCL9/BMP7",2
GO:0038034,"GO:0038034","signal transduction in absence of ligand","2/120","57/12302",0.106601568535926,0.106601568535926,0.519140625821957,"CASP9/CASP3",2
GO:0045454,"GO:0045454","cell redox homeostasis","2/120","57/12302",0.106601568535926,0.106601568535926,0.519140625821957,"GPX1/DDIT3",2
GO:0051702,"GO:0051702","interaction with symbiont","2/120","57/12302",0.106601568535926,0.106601568535926,0.519140625821957,"GPX1/NUCKS1",2
GO:0072332,"GO:0072332","intrinsic apoptotic signaling pathway by p53 class mediator","2/120","57/12302",0.106601568535926,0.106601568535926,0.519140625821957,"UBB/ING2",2
GO:0097192,"GO:0097192","extrinsic apoptotic signaling pathway in absence of ligand","2/120","57/12302",0.106601568535926,0.106601568535926,0.519140625821957,"CASP9/CASP3",2
GO:1903362,"GO:1903362","regulation of cellular protein catabolic process","4/120","186/12302",0.108596339006921,0.108596339006921,0.519140625821957,"SVIP/GPX1/UBB/VCP",4
GO:0032386,"GO:0032386","regulation of intracellular transport","6/120","335/12302",0.109417932065839,0.109417932065839,0.519140625821957,"SVIP/MYO1C/PCM1/PTPN23/SNX3/GAS6",6
GO:0006283,"GO:0006283","transcription-coupled nucleotide-excision repair","2/120","58/12302",0.109732789478909,0.109732789478909,0.519140625821957,"COPS7A/UBB",2
GO:0016575,"GO:0016575","histone deacetylation","2/120","58/12302",0.109732789478909,0.109732789478909,0.519140625821957,"ZNHIT1/ING2",2
GO:0043242,"GO:0043242","negative regulation of protein complex disassembly","2/120","58/12302",0.109732789478909,0.109732789478909,0.519140625821957,"PLEKHH2/CARMIL1",2
GO:0051865,"GO:0051865","protein autoubiquitination","2/120","58/12302",0.109732789478909,0.109732789478909,0.519140625821957,"CNOT4/DDB2",2
GO:0090398,"GO:0090398","cellular senescence","2/120","58/12302",0.109732789478909,0.109732789478909,0.519140625821957,"NUAK1/ING2",2
GO:0140013,"GO:0140013","meiotic nuclear division","3/120","119/12302",0.110376719342502,0.110376719342502,0.519140625821957,"UBB/ING2/PRKAR1A",3
GO:0001675,"GO:0001675","acrosome assembly","1/120","12/12302",0.111020996506062,0.111020996506062,0.519140625821957,"NECTIN2",1
GO:0001916,"GO:0001916","positive regulation of T cell mediated cytotoxicity","1/120","12/12302",0.111020996506062,0.111020996506062,0.519140625821957,"NECTIN2",1
GO:0002566,"GO:0002566","somatic diversification of immune receptors via somatic mutation","1/120","12/12302",0.111020996506062,0.111020996506062,0.519140625821957,"POLM",1
GO:0002834,"GO:0002834","regulation of response to tumor cell","1/120","12/12302",0.111020996506062,0.111020996506062,0.519140625821957,"NECTIN2",1
GO:0002837,"GO:0002837","regulation of immune response to tumor cell","1/120","12/12302",0.111020996506062,0.111020996506062,0.519140625821957,"NECTIN2",1
GO:0006474,"GO:0006474","N-terminal protein amino acid acetylation","1/120","12/12302",0.111020996506062,0.111020996506062,0.519140625821957,"NAA20",1
GO:0006577,"GO:0006577","amino-acid betaine metabolic process","1/120","12/12302",0.111020996506062,0.111020996506062,0.519140625821957,"SLC22A4",1
GO:0006983,"GO:0006983","ER overload response","1/120","12/12302",0.111020996506062,0.111020996506062,0.519140625821957,"DDIT3",1
GO:0007194,"GO:0007194","negative regulation of adenylate cyclase activity","1/120","12/12302",0.111020996506062,0.111020996506062,0.519140625821957,"GNAI3",1
GO:0007289,"GO:0007289","spermatid nucleus differentiation","1/120","12/12302",0.111020996506062,0.111020996506062,0.519140625821957,"NECTIN2",1
GO:0009109,"GO:0009109","coenzyme catabolic process","1/120","12/12302",0.111020996506062,0.111020996506062,0.519140625821957,"VCP",1
GO:0010934,"GO:0010934","macrophage cytokine production","1/120","12/12302",0.111020996506062,0.111020996506062,0.519140625821957,"GAS6",1
GO:0030836,"GO:0030836","positive regulation of actin filament depolymerization","1/120","12/12302",0.111020996506062,0.111020996506062,0.519140625821957,"CARMIL1",1
GO:0032105,"GO:0032105","negative regulation of response to extracellular stimulus","1/120","12/12302",0.111020996506062,0.111020996506062,0.519140625821957,"NUCB2",1
GO:0032108,"GO:0032108","negative regulation of response to nutrient levels","1/120","12/12302",0.111020996506062,0.111020996506062,0.519140625821957,"NUCB2",1
GO:0032823,"GO:0032823","regulation of natural killer cell differentiation","1/120","12/12302",0.111020996506062,0.111020996506062,0.519140625821957,"GAS6",1
GO:0033005,"GO:0033005","positive regulation of mast cell activation","1/120","12/12302",0.111020996506062,0.111020996506062,0.519140625821957,"NECTIN2",1
GO:0034143,"GO:0034143","regulation of toll-like receptor 4 signaling pathway","1/120","12/12302",0.111020996506062,0.111020996506062,0.519140625821957,"PELI1",1
GO:0035518,"GO:0035518","histone H2A monoubiquitination","1/120","12/12302",0.111020996506062,0.111020996506062,0.519140625821957,"DDB2",1
GO:0043558,"GO:0043558","regulation of translational initiation in response to stress","1/120","12/12302",0.111020996506062,0.111020996506062,0.519140625821957,"EIF2AK1",1
GO:0043923,"GO:0043923","positive regulation by host of viral transcription","1/120","12/12302",0.111020996506062,0.111020996506062,0.519140625821957,"NUCKS1",1
GO:0046349,"GO:0046349","amino sugar biosynthetic process","1/120","12/12302",0.111020996506062,0.111020996506062,0.519140625821957,"GNPNAT1",1
GO:0046597,"GO:0046597","negative regulation of viral entry into host cell","1/120","12/12302",0.111020996506062,0.111020996506062,0.519140625821957,"SNX3",1
GO:0050711,"GO:0050711","negative regulation of interleukin-1 secretion","1/120","12/12302",0.111020996506062,0.111020996506062,0.519140625821957,"GAS6",1
GO:0051131,"GO:0051131","chaperone-mediated protein complex assembly","1/120","12/12302",0.111020996506062,0.111020996506062,0.519140625821957,"BBS10",1
GO:0051447,"GO:0051447","negative regulation of meiotic cell cycle","1/120","12/12302",0.111020996506062,0.111020996506062,0.519140625821957,"PRKAR1A",1
GO:0060572,"GO:0060572","morphogenesis of an epithelial bud","1/120","12/12302",0.111020996506062,0.111020996506062,0.519140625821957,"BMP7",1
GO:0070293,"GO:0070293","renal absorption","1/120","12/12302",0.111020996506062,0.111020996506062,0.519140625821957,"GAS6",1
GO:0071025,"GO:0071025","RNA surveillance","1/120","12/12302",0.111020996506062,0.111020996506062,0.519140625821957,"EXOSC9",1
GO:0072488,"GO:0072488","ammonium transmembrane transport","1/120","12/12302",0.111020996506062,0.111020996506062,0.519140625821957,"SLC22A4",1
GO:0090185,"GO:0090185","negative regulation of kidney development","1/120","12/12302",0.111020996506062,0.111020996506062,0.519140625821957,"BMP7",1
GO:0090192,"GO:0090192","regulation of glomerulus development","1/120","12/12302",0.111020996506062,0.111020996506062,0.519140625821957,"BMP7",1
GO:0097152,"GO:0097152","mesenchymal cell apoptotic process","1/120","12/12302",0.111020996506062,0.111020996506062,0.519140625821957,"BMP7",1
GO:1902004,"GO:1902004","positive regulation of amyloid-beta formation","1/120","12/12302",0.111020996506062,0.111020996506062,0.519140625821957,"CASP3",1
GO:1902165,"GO:1902165","regulation of intrinsic apoptotic signaling pathway in response to DNA damage by p53 class mediator","1/120","12/12302",0.111020996506062,0.111020996506062,0.519140625821957,"ING2",1
GO:0007605,"GO:0007605","sensory perception of sound","3/120","120/12302",0.112442958873821,0.112442958873821,0.519140625821957,"GRXCR2/GPX1/CASP3",3
GO:0042100,"GO:0042100","B cell proliferation","2/120","59/12302",0.11288823796061,0.11288823796061,0.519140625821957,"PELI1/CASP3",2
GO:0072028,"GO:0072028","nephron morphogenesis","2/120","59/12302",0.11288823796061,0.11288823796061,0.519140625821957,"MYC/BMP7",2
GO:0033673,"GO:0033673","negative regulation of kinase activity","4/120","189/12302",0.113377701502614,0.113377701502614,0.519140625821957,"FOXA2/BMP7/PRKAR1A/CASP3",4
GO:0034332,"GO:0034332","adherens junction organization","3/120","121/12302",0.11452403820554,0.11452403820554,0.519140625821957,"NECTIN2/PKP2/PTPN23",3
GO:0048592,"GO:0048592","eye morphogenesis","3/120","121/12302",0.11452403820554,0.11452403820554,0.519140625821957,"RARG/BMP7/IFT122",3
GO:0045637,"GO:0045637","regulation of myeloid cell differentiation","4/120","190/12302",0.114992112714269,0.114992112714269,0.519140625821957,"CNOT4/MYC/RARG/ESRRA",4
GO:0051896,"GO:0051896","regulation of protein kinase B signaling","4/120","190/12302",0.114992112714269,0.114992112714269,0.519140625821957,"GPX1/DDIT3/GAS6/MAZ",4
GO:1901990,"GO:1901990","regulation of mitotic cell cycle phase transition","6/120","340/12302",0.115226798590776,0.115226798590776,0.519140625821957,"CNOT4/JADE1/PCM1/DDX3X/CTDSP1/TNKS1BP1",6
GO:0016239,"GO:0016239","positive regulation of macroautophagy","2/120","60/12302",0.116067153650079,0.116067153650079,0.519140625821957,"GNAI3/LARP1",2
GO:0042246,"GO:0042246","tissue regeneration","2/120","60/12302",0.116067153650079,0.116067153650079,0.519140625821957,"GPX1/BCL9",2
GO:0051881,"GO:0051881","regulation of mitochondrial membrane potential","2/120","60/12302",0.116067153650079,0.116067153650079,0.519140625821957,"UBB/VCP",2
GO:0007389,"GO:0007389","pattern specification process","6/120","341/12302",0.116407155242808,0.116407155242808,0.519140625821957,"RARG/FOXA2/BMP7/DDIT3/IFT122/LRP4",6
GO:1901991,"GO:1901991","negative regulation of mitotic cell cycle phase transition","4/120","191/12302",0.11661671385675,0.11661671385675,0.519140625821957,"CNOT4/JADE1/CTDSP1/TNKS1BP1",4
GO:0061025,"GO:0061025","membrane fusion","3/120","122/12302",0.11661976868813,0.11661976868813,0.519140625821957,"NECTIN2/GNAI3/GAS6",3
GO:0071407,"GO:0071407","cellular response to organic cyclic compound","7/120","421/12302",0.117408745652165,0.117408745652165,0.519140625821957,"SP5/CASP9/RARG/BMP7/LARP1/ESRRA/CASP3",7
GO:0010506,"GO:0010506","regulation of autophagy","5/120","266/12302",0.118663251900149,0.118663251900149,0.519140625821957,"GNAI3/SVIP/DDIT3/LARP1/CASP3",5
GO:0001678,"GO:0001678","cellular glucose homeostasis","3/120","123/12302",0.118729961087555,0.118729961087555,0.519140625821957,"NUCKS1/FOXA2/GAS6",3
GO:0002695,"GO:0002695","negative regulation of leukocyte activation","3/120","123/12302",0.118729961087555,0.118729961087555,0.519140625821957,"PELI1/PRKAR1A/CASP3",3
GO:0090316,"GO:0090316","positive regulation of intracellular protein transport","3/120","123/12302",0.118729961087555,0.118729961087555,0.519140625821957,"MYO1C/PCM1/GAS6",3
GO:0051090,"GO:0051090","regulation of DNA-binding transcription factor activity","6/120","343/12302",0.118786290122839,0.118786290122839,0.519140625821957,"PELI1/FOXA2/BMP7/DDIT3/GAS6/UBB",6
GO:1903901,"GO:1903901","negative regulation of viral life cycle","2/120","61/12302",0.11926878851802,0.11926878851802,0.519140625821957,"FAM111A/SNX3",2
GO:0001977,"GO:0001977","renal system process involved in regulation of blood volume","1/120","13/12302",0.119701019322928,0.119701019322928,0.519140625821957,"GAS6",1
GO:0006047,"GO:0006047","UDP-N-acetylglucosamine metabolic process","1/120","13/12302",0.119701019322928,0.119701019322928,0.519140625821957,"GNPNAT1",1
GO:0006144,"GO:0006144","purine nucleobase metabolic process","1/120","13/12302",0.119701019322928,0.119701019322928,0.519140625821957,"DPYD",1
GO:0009650,"GO:0009650","UV protection","1/120","13/12302",0.119701019322928,0.119701019322928,0.519140625821957,"GPX1",1
GO:0018158,"GO:0018158","protein oxidation","1/120","13/12302",0.119701019322928,0.119701019322928,0.519140625821957,"GPX1",1
GO:0032988,"GO:0032988","ribonucleoprotein complex disassembly","1/120","13/12302",0.119701019322928,0.119701019322928,0.519140625821957,"VCP",1
GO:0034199,"GO:0034199","activation of protein kinase A activity","1/120","13/12302",0.119701019322928,0.119701019322928,0.519140625821957,"PRKAR1A",1
GO:0045838,"GO:0045838","positive regulation of membrane potential","1/120","13/12302",0.119701019322928,0.119701019322928,0.519140625821957,"VCP",1
GO:0060973,"GO:0060973","cell migration involved in heart development","1/120","13/12302",0.119701019322928,0.119701019322928,0.519140625821957,"BMP7",1
GO:0072498,"GO:0072498","embryonic skeletal joint development","1/120","13/12302",0.119701019322928,0.119701019322928,0.519140625821957,"BMP7",1
GO:0086069,"GO:0086069","bundle of His cell to Purkinje myocyte communication","1/120","13/12302",0.119701019322928,0.119701019322928,0.519140625821957,"PKP2",1
GO:0042060,"GO:0042060","wound healing","7/120","425/12302",0.121702298694155,0.121702298694155,0.519140625821957,"GPX1/BCL9/FOXA2/GAS6/PRKAR1A/CASP3/CARMIL1",7
GO:0009798,"GO:0009798","axis specification","2/120","62/12302",0.12249240667251,0.12249240667251,0.519140625821957,"FOXA2/DDIT3",2
GO:0030433,"GO:0030433","ubiquitin-dependent ERAD pathway","2/120","62/12302",0.12249240667251,0.12249240667251,0.519140625821957,"SVIP/VCP",2
GO:0001666,"GO:0001666","response to hypoxia","5/120","271/12302",0.12561722565968,0.12561722565968,0.519140625821957,"TBL2/MYC/BMP7/UBB/CASP3",5
GO:0003002,"GO:0003002","regionalization","5/120","271/12302",0.12561722565968,0.12561722565968,0.519140625821957,"RARG/FOXA2/DDIT3/IFT122/LRP4",5
GO:0140029,"GO:0140029","exocytic process","2/120","63/12302",0.125737284196701,0.125737284196701,0.519140625821957,"RAB3B/CTBP2",2
GO:1905897,"GO:1905897","regulation of response to endoplasmic reticulum stress","2/120","63/12302",0.125737284196701,0.125737284196701,0.519140625821957,"SVIP/DDIT3",2
GO:2000779,"GO:2000779","regulation of double-strand break repair","2/120","63/12302",0.125737284196701,0.125737284196701,0.519140625821957,"RIF1/SHLD1",2
GO:0002418,"GO:0002418","immune response to tumor cell","1/120","14/12302",0.128296989514257,0.128296989514257,0.519140625821957,"NECTIN2",1
GO:0006086,"GO:0006086","acetyl-CoA biosynthetic process from pyruvate","1/120","14/12302",0.128296989514257,0.128296989514257,0.519140625821957,"MPC1",1
GO:0006089,"GO:0006089","lactate metabolic process","1/120","14/12302",0.128296989514257,0.128296989514257,0.519140625821957,"PNKD",1
GO:0009048,"GO:0009048","dosage compensation by inactivation of X chromosome","1/120","14/12302",0.128296989514257,0.128296989514257,0.519140625821957,"EIF1",1
GO:0031280,"GO:0031280","negative regulation of cyclase activity","1/120","14/12302",0.128296989514257,0.128296989514257,0.519140625821957,"GNAI3",1
GO:0032095,"GO:0032095","regulation of response to food","1/120","14/12302",0.128296989514257,0.128296989514257,0.519140625821957,"NUCB2",1
GO:0032930,"GO:0032930","positive regulation of superoxide anion generation","1/120","14/12302",0.128296989514257,0.128296989514257,0.519140625821957,"GNAI3",1
GO:0033151,"GO:0033151","V(D)J recombination","1/120","14/12302",0.128296989514257,0.128296989514257,0.519140625821957,"DCAF1",1
GO:0034114,"GO:0034114","regulation of heterotypic cell-cell adhesion","1/120","14/12302",0.128296989514257,0.128296989514257,0.519140625821957,"BMP7",1
GO:0043555,"GO:0043555","regulation of translation in response to stress","1/120","14/12302",0.128296989514257,0.128296989514257,0.519140625821957,"EIF2AK1",1
GO:0044794,"GO:0044794","positive regulation by host of viral process","1/120","14/12302",0.128296989514257,0.128296989514257,0.519140625821957,"NUCKS1",1
GO:0044827,"GO:0044827","modulation by host of viral genome replication","1/120","14/12302",0.128296989514257,0.128296989514257,0.519140625821957,"NUCKS1",1
GO:0050765,"GO:0050765","negative regulation of phagocytosis","1/120","14/12302",0.128296989514257,0.128296989514257,0.519140625821957,"SNX3",1
GO:0050884,"GO:0050884","neuromuscular process controlling posture","1/120","14/12302",0.128296989514257,0.128296989514257,0.519140625821957,"PNKD",1
GO:0051580,"GO:0051580","regulation of neurotransmitter uptake","1/120","14/12302",0.128296989514257,0.128296989514257,0.519140625821957,"RAB3B",1
GO:0060831,"GO:0060831","smoothened signaling pathway involved in dorsal/ventral neural tube patterning","1/120","14/12302",0.128296989514257,0.128296989514257,0.519140625821957,"IFT122",1
GO:0070841,"GO:0070841","inclusion body assembly","1/120","14/12302",0.128296989514257,0.128296989514257,0.519140625821957,"VCP",1
GO:0072109,"GO:0072109","glomerular mesangium development","1/120","14/12302",0.128296989514257,0.128296989514257,0.519140625821957,"BMP7",1
GO:1900017,"GO:1900017","positive regulation of cytokine production involved in inflammatory response","1/120","14/12302",0.128296989514257,0.128296989514257,0.519140625821957,"IL17RC",1
GO:1905331,"GO:1905331","negative regulation of morphogenesis of an epithelium","1/120","14/12302",0.128296989514257,0.128296989514257,0.519140625821957,"BMP7",1
GO:2000047,"GO:2000047","regulation of cell-cell adhesion mediated by cadherin","1/120","14/12302",0.128296989514257,0.128296989514257,0.519140625821957,"FOXA2",1
GO:2000479,"GO:2000479","regulation of cAMP-dependent protein kinase activity","1/120","14/12302",0.128296989514257,0.128296989514257,0.519140625821957,"PRKAR1A",1
GO:2000696,"GO:2000696","regulation of epithelial cell differentiation involved in kidney development","1/120","14/12302",0.128296989514257,0.128296989514257,0.519140625821957,"PRKX",1
GO:0001707,"GO:0001707","mesoderm formation","2/120","64/12302",0.129002708988489,0.129002708988489,0.519140625821957,"BMP7/PRKAR1A",2
GO:0034109,"GO:0034109","homotypic cell-cell adhesion","2/120","64/12302",0.129002708988489,0.129002708988489,0.519140625821957,"PKP2/GAS6",2
GO:0072401,"GO:0072401","signal transduction involved in DNA integrity checkpoint","2/120","64/12302",0.129002708988489,0.129002708988489,0.519140625821957,"CNOT4/TNKS1BP1",2
GO:0072422,"GO:0072422","signal transduction involved in DNA damage checkpoint","2/120","64/12302",0.129002708988489,0.129002708988489,0.519140625821957,"CNOT4/TNKS1BP1",2
GO:1903312,"GO:1903312","negative regulation of mRNA metabolic process","2/120","64/12302",0.129002708988489,0.129002708988489,0.519140625821957,"NBAS/LARP1",2
GO:0045926,"GO:0045926","negative regulation of growth","4/120","199/12302",0.12997129590184,0.12997129590184,0.519140625821957,"JADE1/ING1/DDX3X/GNG4",4
GO:0071383,"GO:0071383","cellular response to steroid hormone stimulus","4/120","199/12302",0.12997129590184,0.12997129590184,0.519140625821957,"CASP9/RARG/BMP7/ESRRA",4
GO:0001656,"GO:0001656","metanephros development","2/120","65/12302",0.132287980602138,0.132287980602138,0.519140625821957,"MYC/BMP7",2
GO:0072395,"GO:0072395","signal transduction involved in cell cycle checkpoint","2/120","65/12302",0.132287980602138,0.132287980602138,0.519140625821957,"CNOT4/TNKS1BP1",2
GO:0110110,"GO:0110110","positive regulation of animal organ morphogenesis","2/120","65/12302",0.132287980602138,0.132287980602138,0.519140625821957,"MYC/BMP7",2
GO:1901879,"GO:1901879","regulation of protein depolymerization","2/120","65/12302",0.132287980602138,0.132287980602138,0.519140625821957,"PLEKHH2/CARMIL1",2
GO:0043405,"GO:0043405","regulation of MAP kinase activity","5/120","276/12302",0.132756721347423,0.132756721347423,0.519140625821957,"AVPI1/BMP7/MAP3K6/IQGAP3/UBB",5
GO:0048332,"GO:0048332","mesoderm morphogenesis","2/120","66/12302",0.135592410091824,0.135592410091824,0.519140625821957,"BMP7/PRKAR1A",2
GO:0042098,"GO:0042098","T cell proliferation","3/120","131/12302",0.136109271004143,0.136109271004143,0.519140625821957,"PELI1/PRKAR1A/CASP3",3
GO:0001914,"GO:0001914","regulation of T cell mediated cytotoxicity","1/120","15/12302",0.136809714226032,0.136809714226032,0.519140625821957,"NECTIN2",1
GO:0003094,"GO:0003094","glomerular filtration","1/120","15/12302",0.136809714226032,0.136809714226032,0.519140625821957,"GAS6",1
GO:0006206,"GO:0006206","pyrimidine nucleobase metabolic process","1/120","15/12302",0.136809714226032,0.136809714226032,0.519140625821957,"DPYD",1
GO:0007549,"GO:0007549","dosage compensation","1/120","15/12302",0.136809714226032,0.136809714226032,0.519140625821957,"EIF1",1
GO:0016540,"GO:0016540","protein autoprocessing","1/120","15/12302",0.136809714226032,0.136809714226032,0.519140625821957,"PCSK2",1
GO:0021854,"GO:0021854","hypothalamus development","1/120","15/12302",0.136809714226032,0.136809714226032,0.519140625821957,"UBB",1
GO:0031065,"GO:0031065","positive regulation of histone deacetylation","1/120","15/12302",0.136809714226032,0.136809714226032,0.519140625821957,"ING2",1
GO:0031167,"GO:0031167","rRNA methylation","1/120","15/12302",0.136809714226032,0.136809714226032,0.519140625821957,"MRM2",1
GO:0032928,"GO:0032928","regulation of superoxide anion generation","1/120","15/12302",0.136809714226032,0.136809714226032,0.519140625821957,"GNAI3",1
GO:0034138,"GO:0034138","toll-like receptor 3 signaling pathway","1/120","15/12302",0.136809714226032,0.136809714226032,0.519140625821957,"PELI1",1
GO:0036342,"GO:0036342","post-anal tail morphogenesis","1/120","15/12302",0.136809714226032,0.136809714226032,0.519140625821957,"SP5",1
GO:0042744,"GO:0042744","hydrogen peroxide catabolic process","1/120","15/12302",0.136809714226032,0.136809714226032,0.519140625821957,"GPX1",1
GO:0042789,"GO:0042789","mRNA transcription by RNA polymerase II","1/120","15/12302",0.136809714226032,0.136809714226032,0.519140625821957,"DDIT3",1
GO:0043162,"GO:0043162","ubiquitin-dependent protein catabolic process via the multivesicular body sorting pathway","1/120","15/12302",0.136809714226032,0.136809714226032,0.519140625821957,"PTPN23",1
GO:0043981,"GO:0043981","histone H4-K5 acetylation","1/120","15/12302",0.136809714226032,0.136809714226032,0.519140625821957,"JADE1",1
GO:0043982,"GO:0043982","histone H4-K8 acetylation","1/120","15/12302",0.136809714226032,0.136809714226032,0.519140625821957,"JADE1",1
GO:0048385,"GO:0048385","regulation of retinoic acid receptor signaling pathway","1/120","15/12302",0.136809714226032,0.136809714226032,0.519140625821957,"CTBP2",1
GO:0050832,"GO:0050832","defense response to fungus","1/120","15/12302",0.136809714226032,0.136809714226032,0.519140625821957,"IL17RC",1
GO:0051782,"GO:0051782","negative regulation of cell division","1/120","15/12302",0.136809714226032,0.136809714226032,0.519140625821957,"MYC",1
GO:0060039,"GO:0060039","pericardium development","1/120","15/12302",0.136809714226032,0.136809714226032,0.519140625821957,"BMP7",1
GO:0060972,"GO:0060972","left/right pattern formation","1/120","15/12302",0.136809714226032,0.136809714226032,0.519140625821957,"IFT122",1
GO:0098911,"GO:0098911","regulation of ventricular cardiac muscle cell action potential","1/120","15/12302",0.136809714226032,0.136809714226032,0.519140625821957,"PKP2",1
GO:1900746,"GO:1900746","regulation of vascular endothelial growth factor signaling pathway","1/120","15/12302",0.136809714226032,0.136809714226032,0.519140625821957,"MYO1C",1
GO:1902547,"GO:1902547","regulation of cellular response to vascular endothelial growth factor stimulus","1/120","15/12302",0.136809714226032,0.136809714226032,0.519140625821957,"MYO1C",1
GO:1902993,"GO:1902993","positive regulation of amyloid precursor protein catabolic process","1/120","15/12302",0.136809714226032,0.136809714226032,0.519140625821957,"CASP3",1
GO:2000269,"GO:2000269","regulation of fibroblast apoptotic process","1/120","15/12302",0.136809714226032,0.136809714226032,0.519140625821957,"GAS6",1
GO:0045860,"GO:0045860","positive regulation of protein kinase activity","7/120","440/12302",0.138514651088867,0.138514651088867,0.519140625821957,"AVPI1/DDX3X/MAP3K6/GAS6/IQGAP3/UBB/PRKAR1A",7
GO:0071902,"GO:0071902","positive regulation of protein serine/threonine kinase activity","5/120","280/12302",0.138598451594478,0.138598451594478,0.519140625821957,"AVPI1/DDX3X/MAP3K6/IQGAP3/UBB",5
GO:1902105,"GO:1902105","regulation of leukocyte differentiation","4/120","204/12302",0.13862906245897,0.13862906245897,0.519140625821957,"MYC/EGR3/GAS6/ESRRA",4
GO:0002702,"GO:0002702","positive regulation of production of molecular mediator of immune response","2/120","67/12302",0.138915319857077,0.138915319857077,0.519140625821957,"RIF1/SHLD1",2
GO:0006919,"GO:0006919","activation of cysteine-type endopeptidase activity involved in apoptotic process","2/120","67/12302",0.138915319857077,0.138915319857077,0.519140625821957,"CASP9/VCP",2
GO:0006970,"GO:0006970","response to osmotic stress","2/120","67/12302",0.138915319857077,0.138915319857077,0.519140625821957,"DDX3X/CASP3",2
GO:0048145,"GO:0048145","regulation of fibroblast proliferation","2/120","67/12302",0.138915319857077,0.138915319857077,0.519140625821957,"MYC/GAS6",2
GO:0098869,"GO:0098869","cellular oxidant detoxification","2/120","67/12302",0.138915319857077,0.138915319857077,0.519140625821957,"GPX1/BMP7",2
GO:1901655,"GO:1901655","cellular response to ketone","2/120","67/12302",0.138915319857077,0.138915319857077,0.519140625821957,"CASP9/LARP1",2
GO:0036293,"GO:0036293","response to decreased oxygen levels","5/120","281/12302",0.140076603138043,0.140076603138043,0.519140625821957,"TBL2/MYC/BMP7/UBB/CASP3",5
GO:0006909,"GO:0006909","phagocytosis","4/120","205/12302",0.140388212845152,0.140388212845152,0.519140625821957,"MYO1C/SNX3/GAS6/EIF2AK1",4
GO:0042326,"GO:0042326","negative regulation of phosphorylation","6/120","361/12302",0.141275538473312,0.141275538473312,0.519140625821957,"MYC/CTDSP1/FOXA2/BMP7/PRKAR1A/CASP3",6
GO:1903706,"GO:1903706","regulation of hemopoiesis","6/120","361/12302",0.141275538473312,0.141275538473312,0.519140625821957,"CNOT4/MYC/RARG/EGR3/GAS6/ESRRA",6
GO:1901988,"GO:1901988","negative regulation of cell cycle phase transition","4/120","206/12302",0.14215636993641,0.14215636993641,0.519140625821957,"CNOT4/JADE1/CTDSP1/TNKS1BP1",4
GO:0032088,"GO:0032088","negative regulation of NF-kappaB transcription factor activity","2/120","68/12302",0.142256043490114,0.142256043490114,0.519140625821957,"PELI1/BMP7",2
GO:0048144,"GO:0048144","fibroblast proliferation","2/120","68/12302",0.142256043490114,0.142256043490114,0.519140625821957,"MYC/GAS6",2
GO:0097581,"GO:0097581","lamellipodium organization","2/120","68/12302",0.142256043490114,0.142256043490114,0.519140625821957,"ARFIP2/CARMIL1",2
GO:0000723,"GO:0000723","telomere maintenance","3/120","134/12302",0.142842018016911,0.142842018016911,0.519140625821957,"RIF1/MYC/TNKS1BP1",3
GO:1903046,"GO:1903046","meiotic cell cycle process","3/120","134/12302",0.142842018016911,0.142842018016911,0.519140625821957,"UBB/ING2/PRKAR1A",3
GO:0043488,"GO:0043488","regulation of mRNA stability","3/120","135/12302",0.145110852287232,0.145110852287232,0.519140625821957,"EXOSC9/LARP1/UBB",3
GO:0090090,"GO:0090090","negative regulation of canonical Wnt signaling pathway","3/120","135/12302",0.145110852287232,0.145110852287232,0.519140625821957,"JADE1/DDIT3/LRP4",3
GO:0050878,"GO:0050878","regulation of body fluid levels","6/120","364/12302",0.145206345107513,0.145206345107513,0.519140625821957,"MYO5B/FOXA2/GAS6/PRKAR1A/SLC22A4/CARMIL1",6
GO:0000466,"GO:0000466","maturation of 5.8S rRNA from tricistronic rRNA transcript (SSU-rRNA, 5.8S rRNA, LSU-rRNA)","1/120","16/12302",0.14523999291838,0.14523999291838,0.519140625821957,"EXOSC9",1
GO:0000469,"GO:0000469","cleavage involved in rRNA processing","1/120","16/12302",0.14523999291838,0.14523999291838,0.519140625821957,"EXOSC9",1
GO:0002407,"GO:0002407","dendritic cell chemotaxis","1/120","16/12302",0.14523999291838,0.14523999291838,0.519140625821957,"GAS6",1
GO:0008356,"GO:0008356","asymmetric cell division","1/120","16/12302",0.14523999291838,0.14523999291838,0.519140625821957,"ING2",1
GO:0010804,"GO:0010804","negative regulation of tumor necrosis factor-mediated signaling pathway","1/120","16/12302",0.14523999291838,0.14523999291838,0.519140625821957,"GAS6",1
GO:0016075,"GO:0016075","rRNA catabolic process","1/120","16/12302",0.14523999291838,0.14523999291838,0.519140625821957,"EXOSC9",1
GO:0019430,"GO:0019430","removal of superoxide radicals","1/120","16/12302",0.14523999291838,0.14523999291838,0.519140625821957,"BMP7",1
GO:0032986,"GO:0032986","protein-DNA complex disassembly","1/120","16/12302",0.14523999291838,0.14523999291838,0.519140625821957,"MYC",1
GO:0033194,"GO:0033194","response to hydroperoxide","1/120","16/12302",0.14523999291838,0.14523999291838,0.519140625821957,"GPX1",1
GO:0034063,"GO:0034063","stress granule assembly","1/120","16/12302",0.14523999291838,0.14523999291838,0.519140625821957,"DDX3X",1
GO:0034123,"GO:0034123","positive regulation of toll-like receptor signaling pathway","1/120","16/12302",0.14523999291838,0.14523999291838,0.519140625821957,"PELI1",1
GO:0034472,"GO:0034472","snRNA 3'-end processing","1/120","16/12302",0.14523999291838,0.14523999291838,0.519140625821957,"EXOSC9",1
GO:0035455,"GO:0035455","response to interferon-alpha","1/120","16/12302",0.14523999291838,0.14523999291838,0.519140625821957,"GAS6",1
GO:0035561,"GO:0035561","regulation of chromatin binding","1/120","16/12302",0.14523999291838,0.14523999291838,0.519140625821957,"CTBP2",1
GO:0042053,"GO:0042053","regulation of dopamine metabolic process","1/120","16/12302",0.14523999291838,0.14523999291838,0.519140625821957,"PNKD",1
GO:0042069,"GO:0042069","regulation of catecholamine metabolic process","1/120","16/12302",0.14523999291838,0.14523999291838,0.519140625821957,"PNKD",1
GO:0045109,"GO:0045109","intermediate filament organization","1/120","16/12302",0.14523999291838,0.14523999291838,0.519140625821957,"PKP2",1
GO:0045723,"GO:0045723","positive regulation of fatty acid biosynthetic process","1/120","16/12302",0.14523999291838,0.14523999291838,0.519140625821957,"SLC45A3",1
GO:0046827,"GO:0046827","positive regulation of protein export from nucleus","1/120","16/12302",0.14523999291838,0.14523999291838,0.519140625821957,"GAS6",1
GO:0050857,"GO:0050857","positive regulation of antigen receptor-mediated signaling pathway","1/120","16/12302",0.14523999291838,0.14523999291838,0.519140625821957,"NECTIN2",1
GO:0051016,"GO:0051016","barbed-end actin filament capping","1/120","16/12302",0.14523999291838,0.14523999291838,0.519140625821957,"CARMIL1",1
GO:0051350,"GO:0051350","negative regulation of lyase activity","1/120","16/12302",0.14523999291838,0.14523999291838,0.519140625821957,"GNAI3",1
GO:0060438,"GO:0060438","trachea development","1/120","16/12302",0.14523999291838,0.14523999291838,0.519140625821957,"RARG",1
GO:0060546,"GO:0060546","negative regulation of necroptotic process","1/120","16/12302",0.14523999291838,0.14523999291838,0.519140625821957,"PELI1",1
GO:0070828,"GO:0070828","heterochromatin organization","1/120","16/12302",0.14523999291838,0.14523999291838,0.519140625821957,"BAHD1",1
GO:0090201,"GO:0090201","negative regulation of release of cytochrome c from mitochondria","1/120","16/12302",0.14523999291838,0.14523999291838,0.519140625821957,"GPX1",1
GO:0097205,"GO:0097205","renal filtration","1/120","16/12302",0.14523999291838,0.14523999291838,0.519140625821957,"GAS6",1
GO:1901881,"GO:1901881","positive regulation of protein depolymerization","1/120","16/12302",0.14523999291838,0.14523999291838,0.519140625821957,"CARMIL1",1
GO:1902176,"GO:1902176","negative regulation of oxidative stress-induced intrinsic apoptotic signaling pathway","1/120","16/12302",0.14523999291838,0.14523999291838,0.519140625821957,"GPX1",1
GO:2000738,"GO:2000738","positive regulation of stem cell differentiation","1/120","16/12302",0.14523999291838,0.14523999291838,0.519140625821957,"BMP7",1
GO:0042475,"GO:0042475","odontogenesis of dentin-containing tooth","2/120","69/12302",0.14561392562502,0.14561392562502,0.519140625821957,"BMP7/LRP4",2
GO:0050764,"GO:0050764","regulation of phagocytosis","2/120","69/12302",0.14561392562502,0.14561392562502,0.519140625821957,"SNX3/GAS6",2
GO:0071158,"GO:0071158","positive regulation of cell cycle arrest","2/120","69/12302",0.14561392562502,0.14561392562502,0.519140625821957,"CNOT4/TNKS1BP1",2
GO:0072384,"GO:0072384","organelle transport along microtubule","2/120","69/12302",0.14561392562502,0.14561392562502,0.519140625821957,"MREG/UBB",2
GO:0002703,"GO:0002703","regulation of leukocyte mediated immunity","3/120","136/12302",0.147391658776153,0.147391658776153,0.519140625821957,"NECTIN2/RIF1/SHLD1",3
GO:0016570,"GO:0016570","histone modification","6/120","366/12302",0.147854859980844,0.147854859980844,0.519140625821957,"RIF1/JADE1/DDB2/DCAF1/ZNHIT1/ING2",6
GO:1900407,"GO:1900407","regulation of cellular response to oxidative stress","2/120","70/12302",0.148988321788775,0.148988321788775,0.519140625821957,"GPX1/BMP7",2
GO:0043491,"GO:0043491","protein kinase B signaling","4/120","210/12302",0.14931738982941,0.14931738982941,0.519140625821957,"GPX1/DDIT3/GAS6/MAZ",4
GO:0006479,"GO:0006479","protein methylation","3/120","137/12302",0.149684245336424,0.149684245336424,0.519140625821957,"RIF1/EEF2KMT/RAB3B",3
GO:0008213,"GO:0008213","protein alkylation","3/120","137/12302",0.149684245336424,0.149684245336424,0.519140625821957,"RIF1/EEF2KMT/RAB3B",3
GO:0051224,"GO:0051224","negative regulation of protein transport","3/120","137/12302",0.149684245336424,0.149684245336424,0.519140625821957,"SVIP/SNX3/GAS6",3
GO:0140056,"GO:0140056","organelle localization by membrane tethering","3/120","137/12302",0.149684245336424,0.149684245336424,0.519140625821957,"RAB3B/PCM1/CTBP2",3
GO:0051348,"GO:0051348","negative regulation of transferase activity","4/120","211/12302",0.151129319841933,0.151129319841933,0.519140625821957,"FOXA2/BMP7/PRKAR1A/CASP3",4
GO:1901987,"GO:1901987","regulation of cell cycle phase transition","6/120","369/12302",0.15186903541419,0.15186903541419,0.519140625821957,"CNOT4/JADE1/PCM1/DDX3X/CTDSP1/TNKS1BP1",6
GO:0022408,"GO:0022408","negative regulation of cell-cell adhesion","3/120","138/12302",0.151988419944394,0.151988419944394,0.519140625821957,"PELI1/PRKAR1A/CASP3",3
GO:0050954,"GO:0050954","sensory perception of mechanical stimulus","3/120","138/12302",0.151988419944394,0.151988419944394,0.519140625821957,"GRXCR2/GPX1/CASP3",3
GO:0006476,"GO:0006476","protein deacetylation","2/120","71/12302",0.152378598254094,0.152378598254094,0.519140625821957,"ZNHIT1/ING2",2
GO:0001779,"GO:0001779","natural killer cell differentiation","1/120","17/12302",0.153588617438142,0.153588617438142,0.519140625821957,"GAS6",1
GO:0002861,"GO:0002861","regulation of inflammatory response to antigenic stimulus","1/120","17/12302",0.153588617438142,0.153588617438142,0.519140625821957,"GPX1",1
GO:0003071,"GO:0003071","renal system process involved in regulation of systemic arterial blood pressure","1/120","17/12302",0.153588617438142,0.153588617438142,0.519140625821957,"GAS6",1
GO:0006293,"GO:0006293","nucleotide-excision repair, preincision complex stabilization","1/120","17/12302",0.153588617438142,0.153588617438142,0.519140625821957,"DDB2",1
GO:0006295,"GO:0006295","nucleotide-excision repair, DNA incision, 3'-to lesion","1/120","17/12302",0.153588617438142,0.153588617438142,0.519140625821957,"DDB2",1
GO:0006907,"GO:0006907","pinocytosis","1/120","17/12302",0.153588617438142,0.153588617438142,0.519140625821957,"CARMIL1",1
GO:0032098,"GO:0032098","regulation of appetite","1/120","17/12302",0.153588617438142,0.153588617438142,0.519140625821957,"NUCB2",1
GO:0032402,"GO:0032402","melanosome transport","1/120","17/12302",0.153588617438142,0.153588617438142,0.519140625821957,"MREG",1
GO:0032816,"GO:0032816","positive regulation of natural killer cell activation","1/120","17/12302",0.153588617438142,0.153588617438142,0.519140625821957,"GAS6",1
GO:0042276,"GO:0042276","error-prone translesion synthesis","1/120","17/12302",0.153588617438142,0.153588617438142,0.519140625821957,"UBB",1
GO:0045662,"GO:0045662","negative regulation of myoblast differentiation","1/120","17/12302",0.153588617438142,0.153588617438142,0.519140625821957,"DDIT3",1
GO:0046628,"GO:0046628","positive regulation of insulin receptor signaling pathway","1/120","17/12302",0.153588617438142,0.153588617438142,0.519140625821957,"NUCKS1",1
GO:0051589,"GO:0051589","negative regulation of neurotransmitter transport","1/120","17/12302",0.153588617438142,0.153588617438142,0.519140625821957,"PNKD",1
GO:0071450,"GO:0071450","cellular response to oxygen radical","1/120","17/12302",0.153588617438142,0.153588617438142,0.519140625821957,"BMP7",1
GO:0071451,"GO:0071451","cellular response to superoxide","1/120","17/12302",0.153588617438142,0.153588617438142,0.519140625821957,"BMP7",1
GO:0086064,"GO:0086064","cell communication by electrical coupling involved in cardiac conduction","1/120","17/12302",0.153588617438142,0.153588617438142,0.519140625821957,"PKP2",1
GO:1902254,"GO:1902254","negative regulation of intrinsic apoptotic signaling pathway by p53 class mediator","1/120","17/12302",0.153588617438142,0.153588617438142,0.519140625821957,"ING2",1
GO:0006338,"GO:0006338","chromatin remodeling","3/120","139/12302",0.154303990738702,0.154303990738702,0.519140625821957,"MYC/ZNHIT1/BAHD1",3
GO:0008064,"GO:0008064","regulation of actin polymerization or depolymerization","3/120","139/12302",0.154303990738702,0.154303990738702,0.519140625821957,"PLEKHH2/MYO1C/CARMIL1",3
GO:0030832,"GO:0030832","regulation of actin filament length","3/120","139/12302",0.154303990738702,0.154303990738702,0.519140625821957,"PLEKHH2/MYO1C/CARMIL1",3
GO:0043487,"GO:0043487","regulation of RNA stability","3/120","139/12302",0.154303990738702,0.154303990738702,0.519140625821957,"EXOSC9/LARP1/UBB",3
GO:0051897,"GO:0051897","positive regulation of protein kinase B signaling","3/120","139/12302",0.154303990738702,0.154303990738702,0.519140625821957,"GPX1/GAS6/MAZ",3
GO:0014706,"GO:0014706","striated muscle tissue development","5/120","291/12302",0.155235662987593,0.155235662987593,0.519140625821957,"GPX1/BCL9/PKP2/BMP7/PRKAR1A",5
GO:0048525,"GO:0048525","negative regulation of viral process","2/120","72/12302",0.155784131894064,0.155784131894064,0.519140625821957,"FAM111A/SNX3",2
GO:0031334,"GO:0031334","positive regulation of protein complex assembly","4/120","214/12302",0.156615761729929,0.156615761729929,0.519140625821957,"DDB2/MYO1C/VCP/CARMIL1",4
GO:1904950,"GO:1904950","negative regulation of establishment of protein localization","3/120","140/12302",0.15663076605799,0.15663076605799,0.519140625821957,"SVIP/SNX3/GAS6",3
GO:0044782,"GO:0044782","cilium organization","5/120","293/12302",0.158347445304231,0.158347445304231,0.519140625821957,"NECTIN2/BBS10/PCM1/PTPN23/IFT122",5
GO:0070167,"GO:0070167","regulation of biomineral tissue development","2/120","73/12302",0.159204310038556,0.159204310038556,0.519140625821957,"BMP7/GAS6",2
GO:0002699,"GO:0002699","positive regulation of immune effector process","3/120","142/12302",0.161317164845809,0.161317164845809,0.519140625821957,"NECTIN2/RIF1/SHLD1",3
GO:0048598,"GO:0048598","embryonic morphogenesis","7/120","459/12302",0.161355856475706,0.161355856475706,0.519140625821957,"RARG/FOXA2/BMP7/IFT122/PRKAR1A/CASP3/LRP4",7
GO:0070482,"GO:0070482","response to oxygen levels","5/120","295/12302",0.161484997575349,0.161484997575349,0.519140625821957,"TBL2/MYC/BMP7/UBB/CASP3",5
GO:0000303,"GO:0000303","response to superoxide","1/120","18/12302",0.16185637209076,0.16185637209076,0.519140625821957,"BMP7",1
GO:0002717,"GO:0002717","positive regulation of natural killer cell mediated immunity","1/120","18/12302",0.16185637209076,0.16185637209076,0.519140625821957,"NECTIN2",1
GO:0006044,"GO:0006044","N-acetylglucosamine metabolic process","1/120","18/12302",0.16185637209076,0.16185637209076,0.519140625821957,"GNPNAT1",1
GO:0009226,"GO:0009226","nucleotide-sugar biosynthetic process","1/120","18/12302",0.16185637209076,0.16185637209076,0.519140625821957,"GNPNAT1",1
GO:0032331,"GO:0032331","negative regulation of chondrocyte differentiation","1/120","18/12302",0.16185637209076,0.16185637209076,0.519140625821957,"RARG",1
GO:0032401,"GO:0032401","establishment of melanosome localization","1/120","18/12302",0.16185637209076,0.16185637209076,0.519140625821957,"MREG",1
GO:0034643,"GO:0034643","establishment of mitochondrion localization, microtubule-mediated","1/120","18/12302",0.16185637209076,0.16185637209076,0.519140625821957,"UBB",1
GO:0036499,"GO:0036499","PERK-mediated unfolded protein response","1/120","18/12302",0.16185637209076,0.16185637209076,0.519140625821957,"DDIT3",1
GO:0045954,"GO:0045954","positive regulation of natural killer cell mediated cytotoxicity","1/120","18/12302",0.16185637209076,0.16185637209076,0.519140625821957,"NECTIN2",1
GO:0047497,"GO:0047497","mitochondrion transport along microtubule","1/120","18/12302",0.16185637209076,0.16185637209076,0.519140625821957,"UBB",1
GO:0050869,"GO:0050869","negative regulation of B cell activation","1/120","18/12302",0.16185637209076,0.16185637209076,0.519140625821957,"CASP3",1
GO:0051450,"GO:0051450","myoblast proliferation","1/120","18/12302",0.16185637209076,0.16185637209076,0.519140625821957,"GPX1",1
GO:0051570,"GO:0051570","regulation of histone H3-K9 methylation","1/120","18/12302",0.16185637209076,0.16185637209076,0.519140625821957,"RIF1",1
GO:0051904,"GO:0051904","pigment granule transport","1/120","18/12302",0.16185637209076,0.16185637209076,0.519140625821957,"MREG",1
GO:0060445,"GO:0060445","branching involved in salivary gland morphogenesis","1/120","18/12302",0.16185637209076,0.16185637209076,0.519140625821957,"BMP7",1
GO:0071218,"GO:0071218","cellular response to misfolded protein","1/120","18/12302",0.16185637209076,0.16185637209076,0.519140625821957,"VCP",1
GO:0072215,"GO:0072215","regulation of metanephros development","1/120","18/12302",0.16185637209076,0.16185637209076,0.519140625821957,"MYC",1
GO:0072337,"GO:0072337","modified amino acid transport","1/120","18/12302",0.16185637209076,0.16185637209076,0.519140625821957,"SLC22A4",1
GO:0090312,"GO:0090312","positive regulation of protein deacetylation","1/120","18/12302",0.16185637209076,0.16185637209076,0.519140625821957,"ING2",1
GO:2000678,"GO:2000678","negative regulation of transcription regulatory region DNA binding","1/120","18/12302",0.16185637209076,0.16185637209076,0.519140625821957,"DDIT3",1
GO:2000778,"GO:2000778","positive regulation of interleukin-6 secretion","1/120","18/12302",0.16185637209076,0.16185637209076,0.519140625821957,"IL17RC",1
GO:2000810,"GO:2000810","regulation of bicellular tight junction assembly","1/120","18/12302",0.16185637209076,0.16185637209076,0.519140625821957,"MYO1C",1
GO:0061448,"GO:0061448","connective tissue development","4/120","217/12302",0.162176363451963,0.162176363451963,0.519140625821957,"RARG/BMP7/ESRRA/UBB",4
GO:0000018,"GO:0000018","regulation of DNA recombination","2/120","74/12302",0.162638530332393,0.162638530332393,0.519140625821957,"RIF1/SHLD1",2
GO:0008625,"GO:0008625","extrinsic apoptotic signaling pathway via death domain receptors","2/120","74/12302",0.162638530332393,0.162638530332393,0.519140625821957,"GPX1/DDX3X",2
GO:0031058,"GO:0031058","positive regulation of histone modification","2/120","74/12302",0.162638530332393,0.162638530332393,0.519140625821957,"RIF1/ING2",2
GO:0045621,"GO:0045621","positive regulation of lymphocyte differentiation","2/120","74/12302",0.162638530332393,0.162638530332393,0.519140625821957,"EGR3/GAS6",2
GO:0006367,"GO:0006367","transcription initiation from RNA polymerase II promoter","3/120","143/12302",0.163676406317967,0.163676406317967,0.519140625821957,"RARG/ESRRA/MAZ",3
GO:0043902,"GO:0043902","positive regulation of multi-organism process","3/120","143/12302",0.163676406317967,0.163676406317967,0.519140625821957,"NUCKS1/DDX3X/LARP1",3
GO:1901796,"GO:1901796","regulation of signal transduction by p53 class mediator","3/120","143/12302",0.163676406317967,0.163676406317967,0.519140625821957,"NUAK1/UBB/ING2",3
GO:0016569,"GO:0016569","covalent chromatin modification","6/120","378/12302",0.164202293837154,0.164202293837154,0.519140625821957,"RIF1/JADE1/DDB2/DCAF1/ZNHIT1/ING2",6
GO:0042176,"GO:0042176","regulation of protein catabolic process","5/120","297/12302",0.164647929401162,0.164647929401162,0.519140625821957,"SVIP/GPX1/SNX3/UBB/VCP",5
GO:0007018,"GO:0007018","microtubule-based movement","4/120","219/12302",0.165923466632206,0.165923466632206,0.519140625821957,"MREG/PCM1/IFT122/UBB",4
GO:0043406,"GO:0043406","positive regulation of MAP kinase activity","4/120","219/12302",0.165923466632206,0.165923466632206,0.519140625821957,"AVPI1/MAP3K6/IQGAP3/UBB",4
GO:0032200,"GO:0032200","telomere organization","3/120","144/12302",0.166046088391314,0.166046088391314,0.519140625821957,"RIF1/MYC/TNKS1BP1",3
GO:0050866,"GO:0050866","negative regulation of cell activation","3/120","144/12302",0.166046088391314,0.166046088391314,0.519140625821957,"PELI1/PRKAR1A/CASP3",3
GO:0010717,"GO:0010717","regulation of epithelial to mesenchymal transition","2/120","75/12302",0.166086200595251,0.166086200595251,0.519140625821957,"FOXA2/BMP7",2
GO:0030838,"GO:0030838","positive regulation of actin filament polymerization","2/120","75/12302",0.166086200595251,0.166086200595251,0.519140625821957,"MYO1C/CARMIL1",2
GO:0033273,"GO:0033273","response to vitamin","2/120","75/12302",0.166086200595251,0.166086200595251,0.519140625821957,"BMP7/GAS6",2
GO:1990748,"GO:1990748","cellular detoxification","2/120","75/12302",0.166086200595251,0.166086200595251,0.519140625821957,"GPX1/BMP7",2
GO:0010639,"GO:0010639","negative regulation of organelle organization","5/120","299/12302",0.167835845605364,0.167835845605364,0.519140625821957,"PLEKHH2/GPX1/BMP7/PRKAR1A/CARMIL1",5
GO:0001935,"GO:0001935","endothelial cell proliferation","3/120","145/12302",0.168426020937729,0.168426020937729,0.519140625821957,"NRAS/PRKX/EGR3",3
GO:0016241,"GO:0016241","regulation of macroautophagy","3/120","145/12302",0.168426020937729,0.168426020937729,0.519140625821957,"GNAI3/LARP1/CASP3",3
GO:0017148,"GO:0017148","negative regulation of translation","3/120","145/12302",0.168426020937729,0.168426020937729,0.519140625821957,"DDX3X/LARP1/EIF2AK1",3
GO:0051146,"GO:0051146","striated muscle cell differentiation","4/120","221/12302",0.169701775688431,0.169701775688431,0.519140625821957,"GPX1/BCL9/PRKAR1A/CASP3",4
GO:0000305,"GO:0000305","response to oxygen radical","1/120","19/12302",0.170044033711495,0.170044033711495,0.519140625821957,"BMP7",1
GO:0006085,"GO:0006085","acetyl-CoA biosynthetic process","1/120","19/12302",0.170044033711495,0.170044033711495,0.519140625821957,"MPC1",1
GO:0007413,"GO:0007413","axonal fasciculation","1/120","19/12302",0.170044033711495,0.170044033711495,0.519140625821957,"CASP3",1
GO:0021513,"GO:0021513","spinal cord dorsal/ventral patterning","1/120","19/12302",0.170044033711495,0.170044033711495,0.519140625821957,"IFT122",1
GO:0030318,"GO:0030318","melanocyte differentiation","1/120","19/12302",0.170044033711495,0.170044033711495,0.519140625821957,"MREG",1
GO:0032400,"GO:0032400","melanosome localization","1/120","19/12302",0.170044033711495,0.170044033711495,0.519140625821957,"MREG",1
GO:0032509,"GO:0032509","endosome transport via multivesicular body sorting pathway","1/120","19/12302",0.170044033711495,0.170044033711495,0.519140625821957,"VCP",1
GO:0036336,"GO:0036336","dendritic cell migration","1/120","19/12302",0.170044033711495,0.170044033711495,0.519140625821957,"GAS6",1
GO:0043921,"GO:0043921","modulation by host of viral transcription","1/120","19/12302",0.170044033711495,0.170044033711495,0.519140625821957,"NUCKS1",1
GO:0046135,"GO:0046135","pyrimidine nucleoside catabolic process","1/120","19/12302",0.170044033711495,0.170044033711495,0.519140625821957,"DPYD",1
GO:0051905,"GO:0051905","establishment of pigment granule localization","1/120","19/12302",0.170044033711495,0.170044033711495,0.519140625821957,"MREG",1
GO:0052472,"GO:0052472","modulation by host of symbiont transcription","1/120","19/12302",0.170044033711495,0.170044033711495,0.519140625821957,"NUCKS1",1
GO:0060547,"GO:0060547","negative regulation of necrotic cell death","1/120","19/12302",0.170044033711495,0.170044033711495,0.519140625821957,"PELI1",1
GO:0060713,"GO:0060713","labyrinthine layer morphogenesis","1/120","19/12302",0.170044033711495,0.170044033711495,0.519140625821957,"BMP7",1
GO:0070861,"GO:0070861","regulation of protein exit from endoplasmic reticulum","1/120","19/12302",0.170044033711495,0.170044033711495,0.519140625821957,"SVIP",1
GO:0097150,"GO:0097150","neuronal stem cell population maintenance","1/120","19/12302",0.170044033711495,0.170044033711495,0.519140625821957,"PCM1",1
GO:0106030,"GO:0106030","neuron projection fasciculation","1/120","19/12302",0.170044033711495,0.170044033711495,0.519140625821957,"CASP3",1
GO:1901798,"GO:1901798","positive regulation of signal transduction by p53 class mediator","1/120","19/12302",0.170044033711495,0.170044033711495,0.519140625821957,"UBB",1
GO:0050670,"GO:0050670","regulation of lymphocyte proliferation","3/120","146/12302",0.170816014236092,0.170816014236092,0.519140625821957,"PELI1/PRKAR1A/CASP3",3
GO:0048545,"GO:0048545","response to steroid hormone","5/120","301/12302",0.171048346448829,0.171048346448829,0.519140625821957,"CASP9/RARG/BMP7/ESRRA/CASP3",5
GO:0051222,"GO:0051222","positive regulation of protein transport","5/120","301/12302",0.171048346448829,0.171048346448829,0.519140625821957,"MYO1C/IL17RC/PCM1/PTPN23/GAS6",5
GO:0072657,"GO:0072657","protein localization to membrane","7/120","467/12302",0.171461461561593,0.171461461561593,0.519140625821957,"TM9SF2/RAB3B/MYO1C/PKP2/GAS6/IFT122/LRP4",7
GO:1903037,"GO:1903037","regulation of leukocyte cell-cell adhesion","4/120","222/12302",0.171602410740665,0.171602410740665,0.519140625821957,"PELI1/EGR3/PRKAR1A/CASP3",4
GO:0016049,"GO:0016049","cell growth","6/120","384/12302",0.172658511249688,0.172658511249688,0.519140625821957,"EXOSC9/JADE1/RARG/ING1/DDX3X/GNG4",6
GO:0001657,"GO:0001657","ureteric bud development","2/120","77/12302",0.173019572352408,0.173019572352408,0.519140625821957,"MYC/BMP7",2
GO:0046916,"GO:0046916","cellular transition metal ion homeostasis","2/120","77/12302",0.173019572352408,0.173019572352408,0.519140625821957,"CYBRD1/MYC",2
GO:0097327,"GO:0097327","response to antineoplastic agent","2/120","77/12302",0.173019572352408,0.173019572352408,0.519140625821957,"CASP9/LARP1",2
GO:0007369,"GO:0007369","gastrulation","3/120","147/12302",0.173215879003704,0.173215879003704,0.519140625821957,"FOXA2/BMP7/PRKAR1A",3
GO:0032944,"GO:0032944","regulation of mononuclear cell proliferation","3/120","147/12302",0.173215879003704,0.173215879003704,0.519140625821957,"PELI1/PRKAR1A/CASP3",3
GO:0033674,"GO:0033674","positive regulation of kinase activity","7/120","469/12302",0.17403104114782,0.17403104114782,0.519140625821957,"AVPI1/DDX3X/MAP3K6/GAS6/IQGAP3/UBB/PRKAR1A",7
GO:0006641,"GO:0006641","triglyceride metabolic process","2/120","78/12302",0.176504139123342,0.176504139123342,0.519140625821957,"GPX1/SLC22A4",2
GO:0007127,"GO:0007127","meiosis I","2/120","78/12302",0.176504139123342,0.176504139123342,0.519140625821957,"UBB/ING2",2
GO:0044773,"GO:0044773","mitotic DNA damage checkpoint","2/120","78/12302",0.176504139123342,0.176504139123342,0.519140625821957,"CNOT4/TNKS1BP1",2
GO:0070498,"GO:0070498","interleukin-1-mediated signaling pathway","2/120","78/12302",0.176504139123342,0.176504139123342,0.519140625821957,"PELI1/UBB",2
GO:0072163,"GO:0072163","mesonephric epithelium development","2/120","78/12302",0.176504139123342,0.176504139123342,0.519140625821957,"MYC/BMP7",2
GO:0072164,"GO:0072164","mesonephric tubule development","2/120","78/12302",0.176504139123342,0.176504139123342,0.519140625821957,"MYC/BMP7",2
GO:1902882,"GO:1902882","regulation of response to oxidative stress","2/120","78/12302",0.176504139123342,0.176504139123342,0.519140625821957,"GPX1/BMP7",2
GO:0060537,"GO:0060537","muscle tissue development","5/120","305/12302",0.177545481554226,0.177545481554226,0.519140625821957,"GPX1/BCL9/PKP2/BMP7/PRKAR1A",5
GO:0002573,"GO:0002573","myeloid leukocyte differentiation","3/120","149/12302",0.178044468190708,0.178044468190708,0.519140625821957,"MYC/ESRRA/EIF2AK1",3
GO:0043401,"GO:0043401","steroid hormone mediated signaling pathway","3/120","149/12302",0.178044468190708,0.178044468190708,0.519140625821957,"RARG/BMP7/ESRRA",3
GO:1902275,"GO:1902275","regulation of chromatin organization","3/120","149/12302",0.178044468190708,0.178044468190708,0.519140625821957,"RIF1/ZNHIT1/ING2",3
GO:0000460,"GO:0000460","maturation of 5.8S rRNA","1/120","20/12302",0.17815237173597,0.17815237173597,0.519140625821957,"EXOSC9",1
GO:0002347,"GO:0002347","response to tumor cell","1/120","20/12302",0.17815237173597,0.17815237173597,0.519140625821957,"NECTIN2",1
GO:0009299,"GO:0009299","mRNA transcription","1/120","20/12302",0.17815237173597,0.17815237173597,0.519140625821957,"DDIT3",1
GO:0016180,"GO:0016180","snRNA processing","1/120","20/12302",0.17815237173597,0.17815237173597,0.519140625821957,"EXOSC9",1
GO:0032104,"GO:0032104","regulation of response to extracellular stimulus","1/120","20/12302",0.17815237173597,0.17815237173597,0.519140625821957,"NUCB2",1
GO:0032107,"GO:0032107","regulation of response to nutrient levels","1/120","20/12302",0.17815237173597,0.17815237173597,0.519140625821957,"NUCB2",1
GO:0033522,"GO:0033522","histone H2A ubiquitination","1/120","20/12302",0.17815237173597,0.17815237173597,0.519140625821957,"DDB2",1
GO:0034377,"GO:0034377","plasma lipoprotein particle assembly","1/120","20/12302",0.17815237173597,0.17815237173597,0.519140625821957,"MTTP",1
GO:0034453,"GO:0034453","microtubule anchoring","1/120","20/12302",0.17815237173597,0.17815237173597,0.519140625821957,"PCM1",1
GO:0036003,"GO:0036003","positive regulation of transcription from RNA polymerase II promoter in response to stress","1/120","20/12302",0.17815237173597,0.17815237173597,0.519140625821957,"DDIT3",1
GO:0045761,"GO:0045761","regulation of adenylate cyclase activity","1/120","20/12302",0.17815237173597,0.17815237173597,0.519140625821957,"GNAI3",1
GO:0051788,"GO:0051788","response to misfolded protein","1/120","20/12302",0.17815237173597,0.17815237173597,0.519140625821957,"VCP",1
GO:0051875,"GO:0051875","pigment granule localization","1/120","20/12302",0.17815237173597,0.17815237173597,0.519140625821957,"MREG",1
GO:0052312,"GO:0052312","modulation of transcription in other organism involved in symbiotic interaction","1/120","20/12302",0.17815237173597,0.17815237173597,0.519140625821957,"NUCKS1",1
GO:0060055,"GO:0060055","angiogenesis involved in wound healing","1/120","20/12302",0.17815237173597,0.17815237173597,0.519140625821957,"GPX1",1
GO:0060544,"GO:0060544","regulation of necroptotic process","1/120","20/12302",0.17815237173597,0.17815237173597,0.519140625821957,"PELI1",1
GO:0060561,"GO:0060561","apoptotic process involved in morphogenesis","1/120","20/12302",0.17815237173597,0.17815237173597,0.519140625821957,"BMP7",1
GO:0060571,"GO:0060571","morphogenesis of an epithelial fold","1/120","20/12302",0.17815237173597,0.17815237173597,0.519140625821957,"BMP7",1
GO:0071377,"GO:0071377","cellular response to glucagon stimulus","1/120","20/12302",0.17815237173597,0.17815237173597,0.519140625821957,"PRKAR1A",1
GO:0098810,"GO:0098810","neurotransmitter reuptake","1/120","20/12302",0.17815237173597,0.17815237173597,0.519140625821957,"RAB3B",1
GO:0099068,"GO:0099068","postsynapse assembly","1/120","20/12302",0.17815237173597,0.17815237173597,0.519140625821957,"LRP4",1
GO:1901071,"GO:1901071","glucosamine-containing compound metabolic process","1/120","20/12302",0.17815237173597,0.17815237173597,0.519140625821957,"GNPNAT1",1
GO:2001025,"GO:2001025","positive regulation of response to drug","1/120","20/12302",0.17815237173597,0.17815237173597,0.519140625821957,"RAB3B",1
GO:0051656,"GO:0051656","establishment of organelle localization","6/120","388/12302",0.178395986355323,0.178395986355323,0.519170981962861,"NECTIN2/MREG/MYO1C/PCM1/CTBP2/UBB",6
GO:0008585,"GO:0008585","female gonad development","2/120","79/12302",0.179999886148204,0.179999886148204,0.520075604029817,"UBB/CASP3",2
GO:0035601,"GO:0035601","protein deacylation","2/120","79/12302",0.179999886148204,0.179999886148204,0.520075604029817,"ZNHIT1/ING2",2
GO:0098732,"GO:0098732","macromolecule deacylation","2/120","79/12302",0.179999886148204,0.179999886148204,0.520075604029817,"ZNHIT1/ING2",2
GO:0050768,"GO:0050768","negative regulation of neurogenesis","4/120","227/12302",0.181216820300061,0.181216820300061,0.520075604029817,"PCM1/CTDSP1/BMP7/LRP4",4
GO:0007517,"GO:0007517","muscle organ development","5/120","308/12302",0.182479832595037,0.182479832595037,0.520075604029817,"GPX1/UNC45A/BCL9/PKP2/EGR3",5
GO:0045785,"GO:0045785","positive regulation of cell adhesion","5/120","308/12302",0.182479832595037,0.182479832595037,0.520075604029817,"EGR3/PTPN23/FOXA2/BMP7/CARMIL1",5
GO:0001823,"GO:0001823","mesonephros development","2/120","80/12302",0.183506270078813,0.183506270078813,0.520075604029817,"MYC/BMP7",2
GO:0002761,"GO:0002761","regulation of myeloid leukocyte differentiation","2/120","80/12302",0.183506270078813,0.183506270078813,0.520075604029817,"MYC/ESRRA",2
GO:0008630,"GO:0008630","intrinsic apoptotic signaling pathway in response to DNA damage","2/120","80/12302",0.183506270078813,0.183506270078813,0.520075604029817,"CASP9/ING2",2
GO:0015696,"GO:0015696","ammonium transport","2/120","80/12302",0.183506270078813,0.183506270078813,0.520075604029817,"RAB3B/SLC22A4",2
GO:0009895,"GO:0009895","negative regulation of catabolic process","4/120","229/12302",0.185112817344971,0.185112817344971,0.520075604029817,"SVIP/NBAS/SNX3/LARP1",4
GO:0001702,"GO:0001702","gastrulation with mouth forming second","1/120","21/12302",0.186182148270059,0.186182148270059,0.520075604029817,"FOXA2",1
GO:0003272,"GO:0003272","endocardial cushion formation","1/120","21/12302",0.186182148270059,0.186182148270059,0.520075604029817,"BMP7",1
GO:0003418,"GO:0003418","growth plate cartilage chondrocyte differentiation","1/120","21/12302",0.186182148270059,0.186182148270059,0.520075604029817,"RARG",1
GO:0003433,"GO:0003433","chondrocyte development involved in endochondral bone morphogenesis","1/120","21/12302",0.186182148270059,0.186182148270059,0.520075604029817,"RARG",1
GO:0006297,"GO:0006297","nucleotide-excision repair, DNA gap filling","1/120","21/12302",0.186182148270059,0.186182148270059,0.520075604029817,"UBB",1
GO:0006515,"GO:0006515","protein quality control for misfolded or incompletely synthesized proteins","1/120","21/12302",0.186182148270059,0.186182148270059,0.520075604029817,"VCP",1
GO:0007097,"GO:0007097","nuclear migration","1/120","21/12302",0.186182148270059,0.186182148270059,0.520075604029817,"PCM1",1
GO:0009954,"GO:0009954","proximal/distal pattern formation","1/120","21/12302",0.186182148270059,0.186182148270059,0.520075604029817,"LRP4",1
GO:0010644,"GO:0010644","cell communication by electrical coupling","1/120","21/12302",0.186182148270059,0.186182148270059,0.520075604029817,"PKP2",1
GO:0010664,"GO:0010664","negative regulation of striated muscle cell apoptotic process","1/120","21/12302",0.186182148270059,0.186182148270059,0.520075604029817,"BMP7",1
GO:0021511,"GO:0021511","spinal cord patterning","1/120","21/12302",0.186182148270059,0.186182148270059,0.520075604029817,"IFT122",1
GO:0031365,"GO:0031365","N-terminal protein amino acid modification","1/120","21/12302",0.186182148270059,0.186182148270059,0.520075604029817,"NAA20",1
GO:0033081,"GO:0033081","regulation of T cell differentiation in thymus","1/120","21/12302",0.186182148270059,0.186182148270059,0.520075604029817,"EGR3",1
GO:0043171,"GO:0043171","peptide catabolic process","1/120","21/12302",0.186182148270059,0.186182148270059,0.520075604029817,"TPP1",1
GO:0044030,"GO:0044030","regulation of DNA methylation","1/120","21/12302",0.186182148270059,0.186182148270059,0.520075604029817,"MYC",1
GO:0045948,"GO:0045948","positive regulation of translational initiation","1/120","21/12302",0.186182148270059,0.186182148270059,0.520075604029817,"DDX3X",1
GO:0060669,"GO:0060669","embryonic placenta morphogenesis","1/120","21/12302",0.186182148270059,0.186182148270059,0.520075604029817,"BMP7",1
GO:0070168,"GO:0070168","negative regulation of biomineral tissue development","1/120","21/12302",0.186182148270059,0.186182148270059,0.520075604029817,"GAS6",1
GO:0072012,"GO:0072012","glomerulus vasculature development","1/120","21/12302",0.186182148270059,0.186182148270059,0.520075604029817,"BMP7",1
GO:1904292,"GO:1904292","regulation of ERAD pathway","1/120","21/12302",0.186182148270059,0.186182148270059,0.520075604029817,"SVIP",1
GO:2000352,"GO:2000352","negative regulation of endothelial cell apoptotic process","1/120","21/12302",0.186182148270059,0.186182148270059,0.520075604029817,"GAS6",1
GO:0036503,"GO:0036503","ERAD pathway","2/120","81/12302",0.187022756936594,0.187022756936594,0.521769068620099,"SVIP/VCP",2
GO:0050863,"GO:0050863","regulation of T cell activation","4/120","231/12302",0.18903643633625,0.18903643633625,0.526726912392028,"PELI1/EGR3/PRKAR1A/CASP3",4
GO:0061982,"GO:0061982","meiosis I cell cycle process","2/120","82/12302",0.190548821984072,0.190548821984072,0.527721431664475,"UBB/ING2",2
GO:0000184,"GO:0000184","nuclear-transcribed mRNA catabolic process, nonsense-mediated decay","2/120","83/12302",0.194083949597956,0.194083949597956,0.527721431664475,"NBAS/HELZ2",2
GO:0021510,"GO:0021510","spinal cord development","2/120","83/12302",0.194083949597956,0.194083949597956,0.527721431664475,"IFT122/SOX12",2
GO:0043618,"GO:0043618","regulation of transcription from RNA polymerase II promoter in response to stress","2/120","83/12302",0.194083949597956,0.194083949597956,0.527721431664475,"DDIT3/UBB",2
GO:0050905,"GO:0050905","neuromuscular process","2/120","83/12302",0.194083949597956,0.194083949597956,0.527721431664475,"TPP1/PNKD",2
GO:0090100,"GO:0090100","positive regulation of transmembrane receptor protein serine/threonine kinase signaling pathway","2/120","83/12302",0.194083949597956,0.194083949597956,0.527721431664475,"BMP7/ING2",2
GO:0098754,"GO:0098754","detoxification","2/120","83/12302",0.194083949597956,0.194083949597956,0.527721431664475,"GPX1/BMP7",2
GO:0006309,"GO:0006309","apoptotic DNA fragmentation","1/120","22/12302",0.194134118159123,0.194134118159123,0.527721431664475,"CASP3",1
GO:0032689,"GO:0032689","negative regulation of interferon-gamma production","1/120","22/12302",0.194134118159123,0.194134118159123,0.527721431664475,"GAS6",1
GO:0040020,"GO:0040020","regulation of meiotic nuclear division","1/120","22/12302",0.194134118159123,0.194134118159123,0.527721431664475,"PRKAR1A",1
GO:0043457,"GO:0043457","regulation of cellular respiration","1/120","22/12302",0.194134118159123,0.194134118159123,0.527721431664475,"VCP",1
GO:0045736,"GO:0045736","negative regulation of cyclin-dependent protein serine/threonine kinase activity","1/120","22/12302",0.194134118159123,0.194134118159123,0.527721431664475,"CASP3",1
GO:0045879,"GO:0045879","negative regulation of smoothened signaling pathway","1/120","22/12302",0.194134118159123,0.194134118159123,0.527721431664475,"IFT122",1
GO:0045992,"GO:0045992","negative regulation of embryonic development","1/120","22/12302",0.194134118159123,0.194134118159123,0.527721431664475,"BMP7",1
GO:0048596,"GO:0048596","embryonic camera-type eye morphogenesis","1/120","22/12302",0.194134118159123,0.194134118159123,0.527721431664475,"BMP7",1
GO:0061437,"GO:0061437","renal system vasculature development","1/120","22/12302",0.194134118159123,0.194134118159123,0.527721431664475,"BMP7",1
GO:0061440,"GO:0061440","kidney vasculature development","1/120","22/12302",0.194134118159123,0.194134118159123,0.527721431664475,"BMP7",1
GO:0085029,"GO:0085029","extracellular matrix assembly","1/120","22/12302",0.194134118159123,0.194134118159123,0.527721431664475,"GAS6",1
GO:1902003,"GO:1902003","regulation of amyloid-beta formation","1/120","22/12302",0.194134118159123,0.194134118159123,0.527721431664475,"CASP3",1
GO:1902745,"GO:1902745","positive regulation of lamellipodium organization","1/120","22/12302",0.194134118159123,0.194134118159123,0.527721431664475,"CARMIL1",1
GO:0032496,"GO:0032496","response to lipopolysaccharide","4/120","234/12302",0.194972069572951,0.194972069572951,0.528708157121342,"PELI1/CASP9/OTUD5/CASP3",4
GO:0071103,"GO:0071103","DNA conformation change","4/120","234/12302",0.194972069572951,0.194972069572951,0.528708157121342,"DDB2/DDX3X/UBB/BAHD1",4
GO:0070663,"GO:0070663","regulation of leukocyte proliferation","3/120","156/12302",0.195227901384509,0.195227901384509,0.528757858148594,"PELI1/PRKAR1A/CASP3",3
GO:0021761,"GO:0021761","limbic system development","2/120","84/12302",0.197627633143789,0.197627633143789,0.53028226460379,"UBB/CASP3",2
GO:0046545,"GO:0046545","development of primary female sexual characteristics","2/120","84/12302",0.197627633143789,0.197627633143789,0.53028226460379,"UBB/CASP3",2
GO:1905269,"GO:1905269","positive regulation of chromatin organization","2/120","84/12302",0.197627633143789,0.197627633143789,0.53028226460379,"RIF1/ING2",2
GO:0002449,"GO:0002449","lymphocyte mediated immunity","3/120","157/12302",0.197716187586932,0.197716187586932,0.53028226460379,"NECTIN2/RIF1/SHLD1",3
GO:0051403,"GO:0051403","stress-activated MAPK cascade","4/120","236/12302",0.198961567875571,0.198961567875571,0.53028226460379,"MYC/MAP3K6/SH2D3A/UBB",4
GO:0009749,"GO:0009749","response to glucose","3/120","158/12302",0.200212300263866,0.200212300263866,0.53028226460379,"FOXA2/GAS6/CASP3",3
GO:0030278,"GO:0030278","regulation of ossification","3/120","158/12302",0.200212300263866,0.200212300263866,0.53028226460379,"BMP7/ESRRA/LRP4",3
GO:0031099,"GO:0031099","regeneration","3/120","158/12302",0.200212300263866,0.200212300263866,0.53028226460379,"GPX1/BCL9/GAS6",3
GO:0006914,"GO:0006914","autophagy","6/120","403/12302",0.200584191343534,0.200584191343534,0.53028226460379,"GNAI3/SVIP/DDIT3/LARP1/VCP/CASP3",6
GO:0061919,"GO:0061919","process utilizing autophagic mechanism","6/120","403/12302",0.200584191343534,0.200584191343534,0.53028226460379,"GNAI3/SVIP/DDIT3/LARP1/VCP/CASP3",6
GO:0010927,"GO:0010927","cellular component assembly involved in morphogenesis","2/120","85/12302",0.201179374852136,0.201179374852136,0.53028226460379,"NECTIN2/PRKAR1A",2
GO:0000154,"GO:0000154","rRNA modification","1/120","23/12302",0.202009029056591,0.202009029056591,0.53028226460379,"MRM2",1
GO:0001782,"GO:0001782","B cell homeostasis","1/120","23/12302",0.202009029056591,0.202009029056591,0.53028226460379,"CASP3",1
GO:0002068,"GO:0002068","glandular epithelial cell development","1/120","23/12302",0.202009029056591,0.202009029056591,0.53028226460379,"RARG",1
GO:0002082,"GO:0002082","regulation of oxidative phosphorylation","1/120","23/12302",0.202009029056591,0.202009029056591,0.53028226460379,"VCP",1
GO:0010390,"GO:0010390","histone monoubiquitination","1/120","23/12302",0.202009029056591,0.202009029056591,0.53028226460379,"DDB2",1
GO:0031954,"GO:0031954","positive regulation of protein autophosphorylation","1/120","23/12302",0.202009029056591,0.202009029056591,0.53028226460379,"TNKS1BP1",1
GO:0032728,"GO:0032728","positive regulation of interferon-beta production","1/120","23/12302",0.202009029056591,0.202009029056591,0.53028226460379,"DDX3X",1
GO:0035116,"GO:0035116","embryonic hindlimb morphogenesis","1/120","23/12302",0.202009029056591,0.202009029056591,0.53028226460379,"RARG",1
GO:0035767,"GO:0035767","endothelial cell chemotaxis","1/120","23/12302",0.202009029056591,0.202009029056591,0.53028226460379,"EGR3",1
GO:0061082,"GO:0061082","myeloid leukocyte cytokine production","1/120","23/12302",0.202009029056591,0.202009029056591,0.53028226460379,"GAS6",1
GO:1902175,"GO:1902175","regulation of oxidative stress-induced intrinsic apoptotic signaling pathway","1/120","23/12302",0.202009029056591,0.202009029056591,0.53028226460379,"GPX1",1
GO:1904030,"GO:1904030","negative regulation of cyclin-dependent protein kinase activity","1/120","23/12302",0.202009029056591,0.202009029056591,0.53028226460379,"CASP3",1
GO:0030178,"GO:0030178","negative regulation of Wnt signaling pathway","3/120","159/12302",0.20271605755466,0.20271605755466,0.53028226460379,"JADE1/DDIT3/LRP4",3
GO:0051701,"GO:0051701","interaction with host","3/120","159/12302",0.20271605755466,0.20271605755466,0.53028226460379,"NECTIN2/SNX3/GAS6",3
GO:0044774,"GO:0044774","mitotic DNA integrity checkpoint","2/120","86/12302",0.204738685696305,0.204738685696305,0.53028226460379,"CNOT4/TNKS1BP1",2
GO:0051261,"GO:0051261","protein depolymerization","2/120","86/12302",0.204738685696305,0.204738685696305,0.53028226460379,"PLEKHH2/CARMIL1",2
GO:0051604,"GO:0051604","protein maturation","4/120","239/12302",0.204992608026828,0.204992608026828,0.53028226460379,"TSPAN17/PCSK2/NAA20/CASP3",4
GO:0034249,"GO:0034249","negative regulation of cellular amide metabolic process","3/120","160/12302",0.205227278374641,0.205227278374641,0.53028226460379,"DDX3X/LARP1/EIF2AK1",3
GO:1902905,"GO:1902905","positive regulation of supramolecular fiber organization","3/120","160/12302",0.205227278374641,0.205227278374641,0.53028226460379,"GPX1/MYO1C/CARMIL1",3
GO:0010951,"GO:0010951","negative regulation of endopeptidase activity","3/120","161/12302",0.207745782436098,0.207745782436098,0.53028226460379,"GPX1/DDX3X/GAS6",3
GO:0001906,"GO:0001906","cell killing","2/120","87/12302",0.208305085271575,0.208305085271575,0.53028226460379,"HMGN2/NECTIN2",2
GO:0034330,"GO:0034330","cell junction organization","4/120","241/12302",0.20904343267918,0.20904343267918,0.53028226460379,"NECTIN2/MYO1C/PKP2/PTPN23",4
GO:0002053,"GO:0002053","positive regulation of mesenchymal cell proliferation","1/120","24/12302",0.209807621491904,0.209807621491904,0.53028226460379,"MYC",1
GO:0007274,"GO:0007274","neuromuscular synaptic transmission","1/120","24/12302",0.209807621491904,0.209807621491904,0.53028226460379,"EGR3",1
GO:0009620,"GO:0009620","response to fungus","1/120","24/12302",0.209807621491904,0.209807621491904,0.53028226460379,"IL17RC",1
GO:0010719,"GO:0010719","negative regulation of epithelial to mesenchymal transition","1/120","24/12302",0.209807621491904,0.209807621491904,0.53028226460379,"FOXA2",1
GO:0016486,"GO:0016486","peptide hormone processing","1/120","24/12302",0.209807621491904,0.209807621491904,0.53028226460379,"PCSK2",1
GO:0019934,"GO:0019934","cGMP-mediated signaling","1/120","24/12302",0.209807621491904,0.209807621491904,0.53028226460379,"PRKAR1A",1
GO:0021846,"GO:0021846","cell proliferation in forebrain","1/120","24/12302",0.209807621491904,0.209807621491904,0.53028226460379,"PCM1",1
GO:0021904,"GO:0021904","dorsal/ventral neural tube patterning","1/120","24/12302",0.209807621491904,0.209807621491904,0.53028226460379,"IFT122",1
GO:0022616,"GO:0022616","DNA strand elongation","1/120","24/12302",0.209807621491904,0.209807621491904,0.53028226460379,"NUCKS1",1
GO:0044788,"GO:0044788","modulation by host of viral process","1/120","24/12302",0.209807621491904,0.209807621491904,0.53028226460379,"NUCKS1",1
GO:0048147,"GO:0048147","negative regulation of fibroblast proliferation","1/120","24/12302",0.209807621491904,0.209807621491904,0.53028226460379,"MYC",1
GO:0051647,"GO:0051647","nucleus localization","1/120","24/12302",0.209807621491904,0.209807621491904,0.53028226460379,"PCM1",1
GO:0060037,"GO:0060037","pharyngeal system development","1/120","24/12302",0.209807621491904,0.209807621491904,0.53028226460379,"BMP7",1
GO:0065005,"GO:0065005","protein-lipid complex assembly","1/120","24/12302",0.209807621491904,0.209807621491904,0.53028226460379,"MTTP",1
GO:0071295,"GO:0071295","cellular response to vitamin","1/120","24/12302",0.209807621491904,0.209807621491904,0.53028226460379,"GAS6",1
GO:0071549,"GO:0071549","cellular response to dexamethasone stimulus","1/120","24/12302",0.209807621491904,0.209807621491904,0.53028226460379,"CASP9",1
GO:0071985,"GO:0071985","multivesicular body sorting pathway","1/120","24/12302",0.209807621491904,0.209807621491904,0.53028226460379,"VCP",1
GO:1902230,"GO:1902230","negative regulation of intrinsic apoptotic signaling pathway in response to DNA damage","1/120","24/12302",0.209807621491904,0.209807621491904,0.53028226460379,"ING2",1
GO:1905209,"GO:1905209","positive regulation of cardiocyte differentiation","1/120","24/12302",0.209807621491904,0.209807621491904,0.53028226460379,"BMP7",1
GO:0008406,"GO:0008406","gonad development","3/120","162/12302",0.210271390268609,0.210271390268609,0.53028226460379,"UBB/ING2/CASP3",3
GO:0002237,"GO:0002237","response to molecule of bacterial origin","4/120","242/12302",0.211077610666983,0.211077610666983,0.53028226460379,"PELI1/CASP9/OTUD5/CASP3",4
GO:0002009,"GO:0002009","morphogenesis of an epithelium","6/120","410/12302",0.211278842489053,0.211278842489053,0.53028226460379,"MYC/RARG/PRKX/BMP7/IFT122/CASP3",6
GO:0001558,"GO:0001558","regulation of cell growth","5/120","325/12302",0.211365137598692,0.211365137598692,0.53028226460379,"EXOSC9/JADE1/ING1/DDX3X/GNG4",5
GO:0043620,"GO:0043620","regulation of DNA-templated transcription in response to stress","2/120","88/12302",0.211878101675917,0.211878101675917,0.53028226460379,"DDIT3/UBB",2
GO:0071156,"GO:0071156","regulation of cell cycle arrest","2/120","88/12302",0.211878101675917,0.211878101675917,0.53028226460379,"CNOT4/TNKS1BP1",2
GO:0006006,"GO:0006006","glucose metabolic process","3/120","163/12302",0.212803923238741,0.212803923238741,0.53028226460379,"CREM/FOXA2/SLC45A3",3
GO:0009746,"GO:0009746","response to hexose","3/120","163/12302",0.212803923238741,0.212803923238741,0.53028226460379,"FOXA2/GAS6/CASP3",3
GO:0009952,"GO:0009952","anterior/posterior pattern specification","3/120","163/12302",0.212803923238741,0.212803923238741,0.53028226460379,"RARG/FOXA2/DDIT3",3
GO:0009617,"GO:0009617","response to bacterium","6/120","411/12302",0.212823215889246,0.212823215889246,0.53028226460379,"PELI1/CASP9/OTUD5/GPX1/SNX3/CASP3",6
GO:0022412,"GO:0022412","cellular process involved in reproduction in multicellular organism","4/120","243/12302",0.213117510781643,0.213117510781643,0.53028226460379,"NECTIN2/UBB/ING2/PRKAR1A",4
GO:1901214,"GO:1901214","regulation of neuron death","4/120","243/12302",0.213117510781643,0.213117510781643,0.53028226460379,"CASP9/DDIT3/UBB/CASP3",4
GO:0007568,"GO:0007568","aging","4/120","244/12302",0.215163041808905,0.215163041808905,0.53028226460379,"CASP9/NUAK1/MNT/ING2",4
GO:0008154,"GO:0008154","actin polymerization or depolymerization","3/120","164/12302",0.215343203569122,0.215343203569122,0.53028226460379,"PLEKHH2/MYO1C/CARMIL1",3
GO:0014902,"GO:0014902","myotube differentiation","2/120","89/12302",0.215457271392192,0.215457271392192,0.53028226460379,"GPX1/BCL9",2
GO:0043666,"GO:0043666","regulation of phosphoprotein phosphatase activity","2/120","89/12302",0.215457271392192,0.215457271392192,0.53028226460379,"NUAK1/PPP1R16A",2
GO:0048593,"GO:0048593","camera-type eye morphogenesis","2/120","89/12302",0.215457271392192,0.215457271392192,0.53028226460379,"BMP7/IFT122",2
GO:0001913,"GO:0001913","T cell mediated cytotoxicity","1/120","25/12302",0.217530628937821,0.217530628937821,0.53028226460379,"NECTIN2",1
GO:0001941,"GO:0001941","postsynaptic membrane organization","1/120","25/12302",0.217530628937821,0.217530628937821,0.53028226460379,"LRP4",1
GO:0015695,"GO:0015695","organic cation transport","1/120","25/12302",0.217530628937821,0.217530628937821,0.53028226460379,"SLC22A4",1
GO:0021884,"GO:0021884","forebrain neuron development","1/120","25/12302",0.217530628937821,0.217530628937821,0.53028226460379,"UBB",1
GO:0030511,"GO:0030511","positive regulation of transforming growth factor beta receptor signaling pathway","1/120","25/12302",0.217530628937821,0.217530628937821,0.53028226460379,"ING2",1
GO:0032814,"GO:0032814","regulation of natural killer cell activation","1/120","25/12302",0.217530628937821,0.217530628937821,0.53028226460379,"GAS6",1
GO:0034661,"GO:0034661","ncRNA catabolic process","1/120","25/12302",0.217530628937821,0.217530628937821,0.53028226460379,"EXOSC9",1
GO:0046039,"GO:0046039","GTP metabolic process","1/120","25/12302",0.217530628937821,0.217530628937821,0.53028226460379,"GNAI3",1
GO:0048741,"GO:0048741","skeletal muscle fiber development","1/120","25/12302",0.217530628937821,0.217530628937821,0.53028226460379,"GPX1",1
GO:0061037,"GO:0061037","negative regulation of cartilage development","1/120","25/12302",0.217530628937821,0.217530628937821,0.53028226460379,"RARG",1
GO:0071312,"GO:0071312","cellular response to alkaloid","1/120","25/12302",0.217530628937821,0.217530628937821,0.53028226460379,"CASP3",1
GO:0071539,"GO:0071539","protein localization to centrosome","1/120","25/12302",0.217530628937821,0.217530628937821,0.53028226460379,"PCM1",1
GO:0086019,"GO:0086019","cell-cell signaling involved in cardiac conduction","1/120","25/12302",0.217530628937821,0.217530628937821,0.53028226460379,"PKP2",1
GO:1901797,"GO:1901797","negative regulation of signal transduction by p53 class mediator","1/120","25/12302",0.217530628937821,0.217530628937821,0.53028226460379,"ING2",1
GO:1903846,"GO:1903846","positive regulation of cellular response to transforming growth factor beta stimulus","1/120","25/12302",0.217530628937821,0.217530628937821,0.53028226460379,"ING2",1
GO:2000036,"GO:2000036","regulation of stem cell population maintenance","1/120","25/12302",0.217530628937821,0.217530628937821,0.53028226460379,"BMP7",1
GO:0002683,"GO:0002683","negative regulation of immune system process","5/120","329/12302",0.218371816260971,0.218371816260971,0.53028226460379,"PELI1/MYC/GPX1/PRKAR1A/CASP3",5
GO:0030330,"GO:0030330","DNA damage response, signal transduction by p53 class mediator","2/120","90/12302",0.219042139171806,0.219042139171806,0.53028226460379,"CNOT4/TNKS1BP1",2
GO:0045861,"GO:0045861","negative regulation of proteolysis","4/120","246/12302",0.219270631905731,0.219270631905731,0.53028226460379,"SVIP/GPX1/DDX3X/GAS6",4
GO:0016236,"GO:0016236","macroautophagy","4/120","247/12302",0.221332508740212,0.221332508740212,0.53028226460379,"GNAI3/LARP1/VCP/CASP3",4
GO:0001938,"GO:0001938","positive regulation of endothelial cell proliferation","2/120","91/12302",0.222632257919803,0.222632257919803,0.53028226460379,"NRAS/EGR3",2
GO:0031398,"GO:0031398","positive regulation of protein ubiquitination","2/120","91/12302",0.222632257919803,0.222632257919803,0.53028226460379,"PELI1/UBB",2
GO:0043244,"GO:0043244","regulation of protein complex disassembly","2/120","91/12302",0.222632257919803,0.222632257919803,0.53028226460379,"PLEKHH2/CARMIL1",2
GO:0006457,"GO:0006457","protein folding","3/120","167/12302",0.222999764172368,0.222999764172368,0.53028226460379,"GNAI3/UNC45A/VCP",3
GO:0045444,"GO:0045444","fat cell differentiation","3/120","167/12302",0.222999764172368,0.222999764172368,0.53028226460379,"GPX1/DDIT3/CTBP2",3
GO:1903311,"GO:1903311","regulation of mRNA metabolic process","4/120","248/12302",0.223399652038053,0.223399652038053,0.53028226460379,"EXOSC9/NBAS/LARP1/UBB",4
GO:0007435,"GO:0007435","salivary gland morphogenesis","1/120","26/12302",0.225178777877095,0.225178777877095,0.53028226460379,"BMP7",1
GO:0009164,"GO:0009164","nucleoside catabolic process","1/120","26/12302",0.225178777877095,0.225178777877095,0.53028226460379,"DPYD",1
GO:0010039,"GO:0010039","response to iron ion","1/120","26/12302",0.225178777877095,0.225178777877095,0.53028226460379,"CYBRD1",1
GO:0030224,"GO:0030224","monocyte differentiation","1/120","26/12302",0.225178777877095,0.225178777877095,0.53028226460379,"MYC",1
GO:0031297,"GO:0031297","replication fork processing","1/120","26/12302",0.225178777877095,0.225178777877095,0.53028226460379,"NUCKS1",1
GO:0032692,"GO:0032692","negative regulation of interleukin-1 production","1/120","26/12302",0.225178777877095,0.225178777877095,0.53028226460379,"GAS6",1
GO:0033363,"GO:0033363","secretory granule organization","1/120","26/12302",0.225178777877095,0.225178777877095,0.53028226460379,"NECTIN2",1
GO:0033762,"GO:0033762","response to glucagon","1/120","26/12302",0.225178777877095,0.225178777877095,0.53028226460379,"PRKAR1A",1
GO:0034142,"GO:0034142","toll-like receptor 4 signaling pathway","1/120","26/12302",0.225178777877095,0.225178777877095,0.53028226460379,"PELI1",1
GO:0034205,"GO:0034205","amyloid-beta formation","1/120","26/12302",0.225178777877095,0.225178777877095,0.53028226460379,"CASP3",1
GO:0035666,"GO:0035666","TRIF-dependent toll-like receptor signaling pathway","1/120","26/12302",0.225178777877095,0.225178777877095,0.53028226460379,"UBB",1
GO:0042269,"GO:0042269","regulation of natural killer cell mediated cytotoxicity","1/120","26/12302",0.225178777877095,0.225178777877095,0.53028226460379,"NECTIN2",1
GO:0042311,"GO:0042311","vasodilation","1/120","26/12302",0.225178777877095,0.225178777877095,0.53028226460379,"GPX1",1
GO:0042554,"GO:0042554","superoxide anion generation","1/120","26/12302",0.225178777877095,0.225178777877095,0.53028226460379,"GNAI3",1
GO:0043928,"GO:0043928","exonucleolytic nuclear-transcribed mRNA catabolic process involved in deadenylation-dependent decay","1/120","26/12302",0.225178777877095,0.225178777877095,0.53028226460379,"EXOSC9",1
GO:0050931,"GO:0050931","pigment cell differentiation","1/120","26/12302",0.225178777877095,0.225178777877095,0.53028226460379,"MREG",1
GO:0090314,"GO:0090314","positive regulation of protein targeting to membrane","1/120","26/12302",0.225178777877095,0.225178777877095,0.53028226460379,"MYO1C",1
GO:0098801,"GO:0098801","regulation of renal system process","1/120","26/12302",0.225178777877095,0.225178777877095,0.53028226460379,"GAS6",1
GO:1901223,"GO:1901223","negative regulation of NIK/NF-kappaB signaling","1/120","26/12302",0.225178777877095,0.225178777877095,0.53028226460379,"BMP7",1
GO:1903131,"GO:1903131","mononuclear cell differentiation","1/120","26/12302",0.225178777877095,0.225178777877095,0.53028226460379,"MYC",1
GO:1905508,"GO:1905508","protein localization to microtubule organizing center","1/120","26/12302",0.225178777877095,0.225178777877095,0.53028226460379,"PCM1",1
GO:2001171,"GO:2001171","positive regulation of ATP biosynthetic process","1/120","26/12302",0.225178777877095,0.225178777877095,0.53028226460379,"VCP",1
GO:0001933,"GO:0001933","negative regulation of protein phosphorylation","5/120","333/12302",0.225451216802253,0.225451216802253,0.53028226460379,"MYC/CTDSP1/BMP7/PRKAR1A/CASP3",5
GO:0006470,"GO:0006470","protein dephosphorylation","4/120","249/12302",0.225471970841204,0.225471970841204,0.53028226460379,"NUAK1/CTDSP1/PTPN23/PPP1R16A",4
GO:0007596,"GO:0007596","blood coagulation","4/120","249/12302",0.225471970841204,0.225471970841204,0.53028226460379,"FOXA2/GAS6/PRKAR1A/CARMIL1",4
GO:0010466,"GO:0010466","negative regulation of peptidase activity","3/120","168/12302",0.225564273924728,0.225564273924728,0.53028226460379,"GPX1/DDX3X/GAS6",3
GO:0034284,"GO:0034284","response to monosaccharide","3/120","168/12302",0.225564273924728,0.225564273924728,0.53028226460379,"FOXA2/GAS6/CASP3",3
GO:0043523,"GO:0043523","regulation of neuron apoptotic process","3/120","168/12302",0.225564273924728,0.225564273924728,0.53028226460379,"CASP9/DDIT3/CASP3",3
GO:0045137,"GO:0045137","development of primary sexual characteristics","3/120","168/12302",0.225564273924728,0.225564273924728,0.53028226460379,"UBB/ING2/CASP3",3
GO:0048738,"GO:0048738","cardiac muscle tissue development","3/120","168/12302",0.225564273924728,0.225564273924728,0.53028226460379,"PKP2/BMP7/PRKAR1A",3
GO:0030183,"GO:0030183","B cell differentiation","2/120","92/12302",0.22622718858139,0.22622718858139,0.530719875602729,"DCAF1/POLM",2
GO:0042737,"GO:0042737","drug catabolic process","2/120","92/12302",0.22622718858139,0.22622718858139,0.530719875602729,"GPX1/DPYD",2
GO:0007584,"GO:0007584","response to nutrient","3/120","169/12302",0.228134655616624,0.228134655616624,0.531161742497431,"FOXA2/BMP7/GAS6",3
GO:1904951,"GO:1904951","positive regulation of establishment of protein localization","5/120","335/12302",0.229017074044557,0.229017074044557,0.531161742497431,"MYO1C/IL17RC/PCM1/PTPN23/GAS6",5
GO:0007599,"GO:0007599","hemostasis","4/120","251/12302",0.229631771551724,0.229631771551724,0.531161742497431,"FOXA2/GAS6/PRKAR1A/CARMIL1",4
GO:0018105,"GO:0018105","peptidyl-serine phosphorylation","4/120","251/12302",0.229631771551724,0.229631771551724,0.531161742497431,"PRKX/GAS6/SH2D3A/TNKS1BP1",4
GO:0050817,"GO:0050817","coagulation","4/120","251/12302",0.229631771551724,0.229631771551724,0.531161742497431,"FOXA2/GAS6/PRKAR1A/CARMIL1",4
GO:0010906,"GO:0010906","regulation of glucose metabolic process","2/120","93/12302",0.229826500029862,0.229826500029862,0.531161742497431,"FOXA2/SLC45A3",2
GO:0048608,"GO:0048608","reproductive structure development","5/120","336/12302",0.230806346293912,0.230806346293912,0.531161742497431,"RARG/BMP7/UBB/ING2/CASP3",5
GO:0046677,"GO:0046677","response to antibiotic","4/120","252/12302",0.231719071993179,0.231719071993179,0.531161742497431,"CASP9/GPX1/LARP1/CASP3",4
GO:0060249,"GO:0060249","anatomical structure homeostasis","5/120","337/12302",0.232599772946413,0.232599772946413,0.531161742497431,"RIF1/BBS10/MYC/TPP1/TNKS1BP1",5
GO:0002715,"GO:0002715","regulation of natural killer cell mediated immunity","1/120","27/12302",0.232752787868521,0.232752787868521,0.531161742497431,"NECTIN2",1
GO:0003413,"GO:0003413","chondrocyte differentiation involved in endochondral bone morphogenesis","1/120","27/12302",0.232752787868521,0.232752787868521,0.531161742497431,"RARG",1
GO:0006369,"GO:0006369","termination of RNA polymerase II transcription","1/120","27/12302",0.232752787868521,0.232752787868521,0.531161742497431,"MAZ",1
GO:0006778,"GO:0006778","porphyrin-containing compound metabolic process","1/120","27/12302",0.232752787868521,0.232752787868521,0.531161742497431,"EIF2AK1",1
GO:0009112,"GO:0009112","nucleobase metabolic process","1/120","27/12302",0.232752787868521,0.232752787868521,0.531161742497431,"DPYD",1
GO:0010939,"GO:0010939","regulation of necrotic cell death","1/120","27/12302",0.232752787868521,0.232752787868521,0.531161742497431,"PELI1",1
GO:0033280,"GO:0033280","response to vitamin D","1/120","27/12302",0.232752787868521,0.232752787868521,0.531161742497431,"BMP7",1
GO:0048713,"GO:0048713","regulation of oligodendrocyte differentiation","1/120","27/12302",0.232752787868521,0.232752787868521,0.531161742497431,"SLC45A3",1
GO:0051954,"GO:0051954","positive regulation of amine transport","1/120","27/12302",0.232752787868521,0.232752787868521,0.531161742497431,"RAB3B",1
GO:0061384,"GO:0061384","heart trabecula morphogenesis","1/120","27/12302",0.232752787868521,0.232752787868521,0.531161742497431,"BMP7",1
GO:0071108,"GO:0071108","protein K48-linked deubiquitination","1/120","27/12302",0.232752787868521,0.232752787868521,0.531161742497431,"OTUD5",1
GO:0098901,"GO:0098901","regulation of cardiac muscle cell action potential","1/120","27/12302",0.232752787868521,0.232752787868521,0.531161742497431,"PKP2",1
GO:0099054,"GO:0099054","presynapse assembly","1/120","27/12302",0.232752787868521,0.232752787868521,0.531161742497431,"LRP4",1
GO:1902235,"GO:1902235","regulation of endoplasmic reticulum stress-induced intrinsic apoptotic signaling pathway","1/120","27/12302",0.232752787868521,0.232752787868521,0.531161742497431,"DDIT3",1
GO:1902991,"GO:1902991","regulation of amyloid precursor protein catabolic process","1/120","27/12302",0.232752787868521,0.232752787868521,0.531161742497431,"CASP3",1
GO:0006469,"GO:0006469","negative regulation of protein kinase activity","3/120","171/12302",0.233292346695931,0.233292346695931,0.531161742497431,"BMP7/PRKAR1A/CASP3",3
GO:0051216,"GO:0051216","cartilage development","3/120","171/12302",0.233292346695931,0.233292346695931,0.531161742497431,"RARG/BMP7/ESRRA",3
GO:0007286,"GO:0007286","spermatid development","2/120","94/12302",0.233429768955924,0.233429768955924,0.531161742497431,"NECTIN2/ING2",2
GO:0017015,"GO:0017015","regulation of transforming growth factor beta receptor signaling pathway","2/120","94/12302",0.233429768955924,0.233429768955924,0.531161742497431,"UBB/ING2",2
GO:0046660,"GO:0046660","female sex differentiation","2/120","94/12302",0.233429768955924,0.233429768955924,0.531161742497431,"UBB/CASP3",2
GO:0002460,"GO:0002460","adaptive immune response based on somatic recombination of immune receptors built from immunoglobulin superfamily domains","3/120","172/12302",0.235879314468862,0.235879314468862,0.531161742497431,"NECTIN2/RIF1/SHLD1",3
GO:0065004,"GO:0065004","protein-DNA complex assembly","3/120","172/12302",0.235879314468862,0.235879314468862,0.531161742497431,"DDB2/SOX12/UBB",3
GO:0061458,"GO:0061458","reproductive system development","5/120","339/12302",0.236198865112232,0.236198865112232,0.531161742497431,"RARG/BMP7/UBB/ING2/CASP3",5
GO:0006638,"GO:0006638","neutral lipid metabolic process","2/120","95/12302",0.237036579758388,0.237036579758388,0.531161742497431,"GPX1/SLC22A4",2
GO:0006639,"GO:0006639","acylglycerol metabolic process","2/120","95/12302",0.237036579758388,0.237036579758388,0.531161742497431,"GPX1/SLC22A4",2
GO:0007043,"GO:0007043","cell-cell junction assembly","2/120","95/12302",0.237036579758388,0.237036579758388,0.531161742497431,"MYO1C/PKP2",2
GO:0022612,"GO:0022612","gland morphogenesis","2/120","95/12302",0.237036579758388,0.237036579758388,0.531161742497431,"RARG/BMP7",2
GO:0031929,"GO:0031929","TOR signaling","2/120","95/12302",0.237036579758388,0.237036579758388,0.531161742497431,"GAS6/LARP1",2
GO:0060349,"GO:0060349","bone morphogenesis","2/120","95/12302",0.237036579758388,0.237036579758388,0.531161742497431,"SP5/RARG",2
GO:0007254,"GO:0007254","JNK cascade","3/120","173/12302",0.238471470980801,0.238471470980801,0.531161742497431,"MAP3K6/SH2D3A/UBB",3
GO:0000291,"GO:0000291","nuclear-transcribed mRNA catabolic process, exonucleolytic","1/120","28/12302",0.240253371612372,0.240253371612372,0.531161742497431,"EXOSC9",1
GO:0000737,"GO:0000737","DNA catabolic process, endonucleolytic","1/120","28/12302",0.240253371612372,0.240253371612372,0.531161742497431,"CASP3",1
GO:0002711,"GO:0002711","positive regulation of T cell mediated immunity","1/120","28/12302",0.240253371612372,0.240253371612372,0.531161742497431,"NECTIN2",1
GO:0010765,"GO:0010765","positive regulation of sodium ion transport","1/120","28/12302",0.240253371612372,0.240253371612372,0.531161742497431,"PKP2",1
GO:0014904,"GO:0014904","myotube cell development","1/120","28/12302",0.240253371612372,0.240253371612372,0.531161742497431,"GPX1",1
GO:0018279,"GO:0018279","protein N-linked glycosylation via asparagine","1/120","28/12302",0.240253371612372,0.240253371612372,0.531161742497431,"VCP",1
GO:0031640,"GO:0031640","killing of cells of other organism","1/120","28/12302",0.240253371612372,0.240253371612372,0.531161742497431,"HMGN2",1
GO:0032094,"GO:0032094","response to food","1/120","28/12302",0.240253371612372,0.240253371612372,0.531161742497431,"NUCB2",1
GO:0035115,"GO:0035115","embryonic forelimb morphogenesis","1/120","28/12302",0.240253371612372,0.240253371612372,0.531161742497431,"IFT122",1
GO:0044364,"GO:0044364","disruption of cells of other organism","1/120","28/12302",0.240253371612372,0.240253371612372,0.531161742497431,"HMGN2",1
GO:0045494,"GO:0045494","photoreceptor cell maintenance","1/120","28/12302",0.240253371612372,0.240253371612372,0.531161742497431,"BBS10",1
GO:0048011,"GO:0048011","neurotrophin TRK receptor signaling pathway","1/120","28/12302",0.240253371612372,0.240253371612372,0.531161742497431,"CASP3",1
GO:0050434,"GO:0050434","positive regulation of viral transcription","1/120","28/12302",0.240253371612372,0.240253371612372,0.531161742497431,"NUCKS1",1
GO:0051567,"GO:0051567","histone H3-K9 methylation","1/120","28/12302",0.240253371612372,0.240253371612372,0.531161742497431,"RIF1",1
GO:0071542,"GO:0071542","dopaminergic neuron differentiation","1/120","28/12302",0.240253371612372,0.240253371612372,0.531161742497431,"FOXA2",1
GO:0086005,"GO:0086005","ventricular cardiac muscle cell action potential","1/120","28/12302",0.240253371612372,0.240253371612372,0.531161742497431,"PKP2",1
GO:0097009,"GO:0097009","energy homeostasis","1/120","28/12302",0.240253371612372,0.240253371612372,0.531161742497431,"UBB",1
GO:0110111,"GO:0110111","negative regulation of animal organ morphogenesis","1/120","28/12302",0.240253371612372,0.240253371612372,0.531161742497431,"BMP7",1
GO:1902742,"GO:1902742","apoptotic process involved in development","1/120","28/12302",0.240253371612372,0.240253371612372,0.531161742497431,"BMP7",1
GO:1903844,"GO:1903844","regulation of cellular response to transforming growth factor beta stimulus","2/120","96/12302",0.240646524436227,0.240646524436227,0.531459636717519,"UBB/ING2",2
GO:0032869,"GO:0032869","cellular response to insulin stimulus","3/120","174/12302",0.24106864793464,0.24106864793464,0.531459636717519,"MYO1C/NUCKS1/ESRRA",3
GO:0009306,"GO:0009306","protein secretion","6/120","430/12302",0.242889346756442,0.242889346756442,0.531459636717519,"RAB3B/IL17RC/PTPN23/FOXA2/GAS6/MTTP",6
GO:0006814,"GO:0006814","sodium ion transport","3/120","175/12302",0.243670678061114,0.243670678061114,0.531459636717519,"PKP2/SLC9A8/SLC22A4",3
GO:0051321,"GO:0051321","meiotic cell cycle","3/120","175/12302",0.243670678061114,0.243670678061114,0.531459636717519,"UBB/ING2/PRKAR1A",3
GO:0045727,"GO:0045727","positive regulation of translation","2/120","97/12302",0.244259202481976,0.244259202481976,0.531459636717519,"DDX3X/LARP1",2
GO:0120031,"GO:0120031","plasma membrane bounded cell projection assembly","6/120","432/12302",0.2461282566418,0.2461282566418,0.531459636717519,"ARFIP2/BBS10/PCM1/PTPN23/IFT122/CARMIL1",6
GO:0045665,"GO:0045665","negative regulation of neuron differentiation","3/120","176/12302",0.246277395131234,0.246277395131234,0.531459636717519,"CTDSP1/BMP7/LRP4",3
GO:1903829,"GO:1903829","positive regulation of cellular protein localization","4/120","259/12302",0.246459872151754,0.246459872151754,0.531459636717519,"MYO1C/PCM1/GAS6/LRP4",4
GO:0002756,"GO:0002756","MyD88-independent toll-like receptor signaling pathway","1/120","29/12302",0.247681235015217,0.247681235015217,0.531459636717519,"UBB",1
GO:0003156,"GO:0003156","regulation of animal organ formation","1/120","29/12302",0.247681235015217,0.247681235015217,0.531459636717519,"BMP7",1
GO:0007431,"GO:0007431","salivary gland development","1/120","29/12302",0.247681235015217,0.247681235015217,0.531459636717519,"BMP7",1
GO:0009225,"GO:0009225","nucleotide-sugar metabolic process","1/120","29/12302",0.247681235015217,0.247681235015217,0.531459636717519,"GNPNAT1",1
GO:0018196,"GO:0018196","peptidyl-asparagine modification","1/120","29/12302",0.247681235015217,0.247681235015217,0.531459636717519,"VCP",1
GO:0019068,"GO:0019068","virion assembly","1/120","29/12302",0.247681235015217,0.247681235015217,0.531459636717519,"UBB",1
GO:0030262,"GO:0030262","apoptotic nuclear changes","1/120","29/12302",0.247681235015217,0.247681235015217,0.531459636717519,"CASP3",1
GO:0032008,"GO:0032008","positive regulation of TOR signaling","1/120","29/12302",0.247681235015217,0.247681235015217,0.531459636717519,"GAS6",1
GO:0032148,"GO:0032148","activation of protein kinase B activity","1/120","29/12302",0.247681235015217,0.247681235015217,0.531459636717519,"GAS6",1
GO:0032435,"GO:0032435","negative regulation of proteasomal ubiquitin-dependent protein catabolic process","1/120","29/12302",0.247681235015217,0.247681235015217,0.531459636717519,"SVIP",1
GO:0043029,"GO:0043029","T cell homeostasis","1/120","29/12302",0.247681235015217,0.247681235015217,0.531459636717519,"CASP3",1
GO:0043243,"GO:0043243","positive regulation of protein complex disassembly","1/120","29/12302",0.247681235015217,0.247681235015217,0.531459636717519,"CARMIL1",1
GO:0045923,"GO:0045923","positive regulation of fatty acid metabolic process","1/120","29/12302",0.247681235015217,0.247681235015217,0.531459636717519,"SLC45A3",1
GO:0046825,"GO:0046825","regulation of protein export from nucleus","1/120","29/12302",0.247681235015217,0.247681235015217,0.531459636717519,"GAS6",1
GO:0060612,"GO:0060612","adipose tissue development","1/120","29/12302",0.247681235015217,0.247681235015217,0.531459636717519,"UBB",1
GO:0097028,"GO:0097028","dendritic cell differentiation","1/120","29/12302",0.247681235015217,0.247681235015217,0.531459636717519,"GAS6",1
GO:1900026,"GO:1900026","positive regulation of substrate adhesion-dependent cell spreading","1/120","29/12302",0.247681235015217,0.247681235015217,0.531459636717519,"CARMIL1",1
GO:1903393,"GO:1903393","positive regulation of adherens junction organization","1/120","29/12302",0.247681235015217,0.247681235015217,0.531459636717519,"PTPN23",1
GO:1905898,"GO:1905898","positive regulation of response to endoplasmic reticulum stress","1/120","29/12302",0.247681235015217,0.247681235015217,0.531459636717519,"DDIT3",1
GO:0010035,"GO:0010035","response to inorganic substance","6/120","433/12302",0.24775257749702,0.24775257749702,0.531459636717519,"CYBRD1/CASP9/GPX1/BMP7/VCP/CASP3",6
GO:0002700,"GO:0002700","regulation of production of molecular mediator of immune response","2/120","98/12302",0.247874220776459,0.247874220776459,0.531459636717519,"RIF1/SHLD1",2
GO:0010631,"GO:0010631","epithelial cell migration","4/120","260/12302",0.248583148689022,0.248583148689022,0.531459636717519,"GPX1/PRKX/EGR3/PTPN23",4
GO:0048732,"GO:0048732","gland development","5/120","346/12302",0.248918295964236,0.248918295964236,0.531459636717519,"GPX1/GNPNAT1/RARG/BMP7/IQGAP3",5
GO:0007264,"GO:0007264","small GTPase mediated signal transduction","6/120","434/12302",0.249380090441248,0.249380090441248,0.531459636717519,"ARHGEF3/ARFIP2/RAB3B/NRAS/SH2D3A/IQGAP3",6
GO:0031098,"GO:0031098","stress-activated protein kinase signaling cascade","4/120","261/12302",0.250710518380089,0.250710518380089,0.531459636717519,"MYC/MAP3K6/SH2D3A/UBB",4
GO:0045089,"GO:0045089","positive regulation of innate immune response","4/120","261/12302",0.250710518380089,0.250710518380089,0.531459636717519,"NECTIN2/PELI1/NRAS/UBB",4
GO:0071375,"GO:0071375","cellular response to peptide hormone stimulus","4/120","261/12302",0.250710518380089,0.250710518380089,0.531459636717519,"MYO1C/NUCKS1/ESRRA/PRKAR1A",4
GO:1902532,"GO:1902532","negative regulation of intracellular signal transduction","6/120","435/12302",0.251010756521347,0.251010756521347,0.531459636717519,"MYC/GPX1/DDX3X/BMP7/DDIT3/ING2",6
GO:0018022,"GO:0018022","peptidyl-lysine methylation","2/120","99/12302",0.251491193484831,0.251491193484831,0.531459636717519,"RIF1/EEF2KMT",2
GO:0032434,"GO:0032434","regulation of proteasomal ubiquitin-dependent protein catabolic process","2/120","99/12302",0.251491193484831,0.251491193484831,0.531459636717519,"SVIP/VCP",2
GO:0032479,"GO:0032479","regulation of type I interferon production","2/120","99/12302",0.251491193484831,0.251491193484831,0.531459636717519,"OTUD5/DDX3X",2
GO:0045995,"GO:0045995","regulation of embryonic development","2/120","99/12302",0.251491193484831,0.251491193484831,0.531459636717519,"FOXA2/BMP7",2
GO:0009755,"GO:0009755","hormone-mediated signaling pathway","3/120","178/12302",0.251504230459078,0.251504230459078,0.531459636717519,"RARG/BMP7/ESRRA",3
GO:0090132,"GO:0090132","epithelium migration","4/120","262/12302",0.252841892068669,0.252841892068669,0.531459636717519,"GPX1/PRKX/EGR3/PTPN23",4
GO:0000302,"GO:0000302","response to reactive oxygen species","3/120","179/12302",0.2541240215654,0.2541240215654,0.531459636717519,"GPX1/BMP7/CASP3",3
GO:0010721,"GO:0010721","negative regulation of cell development","4/120","263/12302",0.254977180798644,0.254977180798644,0.531459636717519,"PCM1/CTDSP1/BMP7/LRP4",4
GO:0006040,"GO:0006040","amino sugar metabolic process","1/120","30/12302",0.25503707725413,0.25503707725413,0.531459636717519,"GNPNAT1",1
GO:0006921,"GO:0006921","cellular component disassembly involved in execution phase of apoptosis","1/120","30/12302",0.25503707725413,0.25503707725413,0.531459636717519,"CASP3",1
GO:0010662,"GO:0010662","regulation of striated muscle cell apoptotic process","1/120","30/12302",0.25503707725413,0.25503707725413,0.531459636717519,"BMP7",1
GO:0035137,"GO:0035137","hindlimb morphogenesis","1/120","30/12302",0.25503707725413,0.25503707725413,0.531459636717519,"RARG",1
GO:0040019,"GO:0040019","positive regulation of embryonic development","1/120","30/12302",0.25503707725413,0.25503707725413,0.531459636717519,"FOXA2",1
GO:0042417,"GO:0042417","dopamine metabolic process","1/120","30/12302",0.25503707725413,0.25503707725413,0.531459636717519,"PNKD",1
GO:0050856,"GO:0050856","regulation of T cell receptor signaling pathway","1/120","30/12302",0.25503707725413,0.25503707725413,0.531459636717519,"NECTIN2",1
GO:0051693,"GO:0051693","actin filament capping","1/120","30/12302",0.25503707725413,0.25503707725413,0.531459636717519,"CARMIL1",1
GO:0086091,"GO:0086091","regulation of heart rate by cardiac conduction","1/120","30/12302",0.25503707725413,0.25503707725413,0.531459636717519,"PKP2",1
GO:0090313,"GO:0090313","regulation of protein targeting to membrane","1/120","30/12302",0.25503707725413,0.25503707725413,0.531459636717519,"MYO1C",1
GO:0099172,"GO:0099172","presynapse organization","1/120","30/12302",0.25503707725413,0.25503707725413,0.531459636717519,"LRP4",1
GO:1901031,"GO:1901031","regulation of response to reactive oxygen species","1/120","30/12302",0.25503707725413,0.25503707725413,0.531459636717519,"BMP7",1
GO:0007156,"GO:0007156","homophilic cell adhesion via plasma membrane adhesion molecules","2/120","100/12302",0.255109741953914,0.255109741953914,0.531459636717519,"NECTIN2/PTPN23",2
GO:0032606,"GO:0032606","type I interferon production","2/120","100/12302",0.255109741953914,0.255109741953914,0.531459636717519,"OTUD5/DDX3X",2
GO:0045667,"GO:0045667","regulation of osteoblast differentiation","2/120","100/12302",0.255109741953914,0.255109741953914,0.531459636717519,"BMP7/ESRRA",2
GO:0048515,"GO:0048515","spermatid differentiation","2/120","100/12302",0.255109741953914,0.255109741953914,0.531459636717519,"NECTIN2/ING2",2
GO:0001667,"GO:0001667","ameboidal-type cell migration","5/120","351/12302",0.258112496348676,0.258112496348676,0.531459636717519,"GPX1/PRKX/EGR3/PTPN23/BMP7",5
GO:0031349,"GO:0031349","positive regulation of defense response","5/120","351/12302",0.258112496348676,0.258112496348676,0.531459636717519,"NECTIN2/PELI1/NRAS/IL17RC/UBB",5
GO:0001704,"GO:0001704","formation of primary germ layer","2/120","101/12302",0.258729494610823,0.258729494610823,0.531459636717519,"BMP7/PRKAR1A",2
GO:0007292,"GO:0007292","female gamete generation","2/120","101/12302",0.258729494610823,0.258729494610823,0.531459636717519,"UBB/PRKAR1A",2
GO:0008584,"GO:0008584","male gonad development","2/120","101/12302",0.258729494610823,0.258729494610823,0.531459636717519,"UBB/ING2",2
GO:0042476,"GO:0042476","odontogenesis","2/120","101/12302",0.258729494610823,0.258729494610823,0.531459636717519,"BMP7/LRP4",2
GO:1905477,"GO:1905477","positive regulation of protein localization to membrane","2/120","101/12302",0.258729494610823,0.258729494610823,0.531459636717519,"MYO1C/LRP4",2
GO:0030031,"GO:0030031","cell projection assembly","6/120","440/12302",0.259210017444605,0.259210017444605,0.531459636717519,"ARFIP2/BBS10/PCM1/PTPN23/IFT122/CARMIL1",6
GO:0030098,"GO:0030098","lymphocyte differentiation","4/120","265/12302",0.259259148607619,0.259259148607619,0.531459636717519,"DCAF1/EGR3/GAS6/POLM",4
GO:0090130,"GO:0090130","tissue migration","4/120","266/12302",0.261405650847428,0.261405650847428,0.531459636717519,"GPX1/PRKX/EGR3/PTPN23",4
GO:0034248,"GO:0034248","regulation of cellular amide metabolic process","5/120","353/12302",0.261813746286085,0.261813746286085,0.531459636717519,"DDX3X/EIF1/LARP1/EIF2AK1/CASP3",5
GO:0043434,"GO:0043434","response to peptide hormone","5/120","353/12302",0.261813746286085,0.261813746286085,0.531459636717519,"MYO1C/NUCKS1/BMP7/ESRRA/PRKAR1A",5
GO:0090092,"GO:0090092","regulation of transmembrane receptor protein serine/threonine kinase signaling pathway","3/120","182/12302",0.262006948532845,0.262006948532845,0.531459636717519,"BMP7/UBB/ING2",3
GO:0001912,"GO:0001912","positive regulation of leukocyte mediated cytotoxicity","1/120","31/12302",0.262321590840302,0.262321590840302,0.531459636717519,"NECTIN2",1
GO:0002755,"GO:0002755","MyD88-dependent toll-like receptor signaling pathway","1/120","31/12302",0.262321590840302,0.262321590840302,0.531459636717519,"UBB",1
GO:0003417,"GO:0003417","growth plate cartilage development","1/120","31/12302",0.262321590840302,0.262321590840302,0.531459636717519,"RARG",1
GO:0010470,"GO:0010470","regulation of gastrulation","1/120","31/12302",0.262321590840302,0.262321590840302,0.531459636717519,"FOXA2",1
GO:0010677,"GO:0010677","negative regulation of cellular carbohydrate metabolic process","1/120","31/12302",0.262321590840302,0.262321590840302,0.531459636717519,"FOXA2",1
GO:0030890,"GO:0030890","positive regulation of B cell proliferation","1/120","31/12302",0.262321590840302,0.262321590840302,0.531459636717519,"PELI1",1
GO:0033003,"GO:0033003","regulation of mast cell activation","1/120","31/12302",0.262321590840302,0.262321590840302,0.531459636717519,"NECTIN2",1
GO:0035329,"GO:0035329","hippo signaling","1/120","31/12302",0.262321590840302,0.262321590840302,0.531459636717519,"CASP3",1
GO:0042771,"GO:0042771","intrinsic apoptotic signaling pathway in response to DNA damage by p53 class mediator","1/120","31/12302",0.262321590840302,0.262321590840302,0.531459636717519,"ING2",1
GO:0043628,"GO:0043628","ncRNA 3'-end processing","1/120","31/12302",0.262321590840302,0.262321590840302,0.531459636717519,"EXOSC9",1
GO:0070423,"GO:0070423","nucleotide-binding oligomerization domain containing signaling pathway","1/120","31/12302",0.262321590840302,0.262321590840302,0.531459636717519,"UBB",1
GO:0072529,"GO:0072529","pyrimidine-containing compound catabolic process","1/120","31/12302",0.262321590840302,0.262321590840302,0.531459636717519,"DPYD",1
GO:0097242,"GO:0097242","amyloid-beta clearance","1/120","31/12302",0.262321590840302,0.262321590840302,0.531459636717519,"LRP4",1
GO:1902229,"GO:1902229","regulation of intrinsic apoptotic signaling pathway in response to DNA damage","1/120","31/12302",0.262321590840302,0.262321590840302,0.531459636717519,"ING2",1
GO:1904036,"GO:1904036","negative regulation of epithelial cell apoptotic process","1/120","31/12302",0.262321590840302,0.262321590840302,0.531459636717519,"GAS6",1
GO:0009116,"GO:0009116","nucleoside metabolic process","2/120","102/12302",0.262350086862849,0.262350086862849,0.531459636717519,"GNAI3/DPYD",2
GO:0032675,"GO:0032675","regulation of interleukin-6 production","2/120","102/12302",0.262350086862849,0.262350086862849,0.531459636717519,"IL17RC/GAS6",2
GO:0046546,"GO:0046546","development of primary male sexual characteristics","2/120","102/12302",0.262350086862849,0.262350086862849,0.531459636717519,"UBB/ING2",2
GO:0007178,"GO:0007178","transmembrane receptor protein serine/threonine kinase signaling pathway","4/120","267/12302",0.263555714465764,0.263555714465764,0.532895347815599,"FAM83G/BMP7/UBB/ING2",4
GO:0045936,"GO:0045936","negative regulation of phosphate metabolic process","6/120","443/12302",0.26416490937038,0.26416490937038,0.532895347815599,"MYC/CTDSP1/FOXA2/BMP7/PRKAR1A/CASP3",6
GO:0043312,"GO:0043312","neutrophil degranulation","5/120","355/12302",0.265527789950181,0.265527789950181,0.532895347815599,"SVIP/NRAS/DDX3X/UBR4/VCP",5
GO:0018209,"GO:0018209","peptidyl-serine modification","4/120","268/12302",0.26570925162609,0.26570925162609,0.532895347815599,"PRKX/GAS6/SH2D3A/TNKS1BP1",4
GO:0032984,"GO:0032984","protein-containing complex disassembly","4/120","268/12302",0.26570925162609,0.26570925162609,0.532895347815599,"PLEKHH2/MYC/VCP/CARMIL1",4
GO:0010563,"GO:0010563","negative regulation of phosphorus metabolic process","6/120","444/12302",0.265822193912349,0.265822193912349,0.532895347815599,"MYC/CTDSP1/FOXA2/BMP7/PRKAR1A/CASP3",6
GO:0006282,"GO:0006282","regulation of DNA repair","2/120","103/12302",0.265971160998603,0.265971160998603,0.532895347815599,"RIF1/SHLD1",2
GO:0007498,"GO:0007498","mesoderm development","2/120","103/12302",0.265971160998603,0.265971160998603,0.532895347815599,"BMP7/PRKAR1A",2
GO:0042177,"GO:0042177","negative regulation of protein catabolic process","2/120","103/12302",0.265971160998603,0.265971160998603,0.532895347815599,"SVIP/SNX3",2
GO:2000241,"GO:2000241","regulation of reproductive process","2/120","103/12302",0.265971160998603,0.265971160998603,0.532895347815599,"BMP7/PRKAR1A",2
GO:0031669,"GO:0031669","cellular response to nutrient levels","3/120","184/12302",0.267280266508572,0.267280266508572,0.532895347815599,"TBL2/FOXA2/GAS6",3
GO:0002283,"GO:0002283","neutrophil activation involved in immune response","5/120","357/12302",0.269254178189942,0.269254178189942,0.532895347815599,"SVIP/NRAS/DDX3X/UBR4/VCP",5
GO:0003203,"GO:0003203","endocardial cushion morphogenesis","1/120","32/12302",0.269535461682056,0.269535461682056,0.532895347815599,"BMP7",1
GO:0006084,"GO:0006084","acetyl-CoA metabolic process","1/120","32/12302",0.269535461682056,0.269535461682056,0.532895347815599,"MPC1",1
GO:0007212,"GO:0007212","dopamine receptor signaling pathway","1/120","32/12302",0.269535461682056,0.269535461682056,0.532895347815599,"GNAI3",1
GO:0010464,"GO:0010464","regulation of mesenchymal cell proliferation","1/120","32/12302",0.269535461682056,0.269535461682056,0.532895347815599,"MYC",1
GO:0031279,"GO:0031279","regulation of cyclase activity","1/120","32/12302",0.269535461682056,0.269535461682056,0.532895347815599,"GNAI3",1
GO:0035872,"GO:0035872","nucleotide-binding domain, leucine rich repeat containing receptor signaling pathway","1/120","32/12302",0.269535461682056,0.269535461682056,0.532895347815599,"UBB",1
GO:0038084,"GO:0038084","vascular endothelial growth factor signaling pathway","1/120","32/12302",0.269535461682056,0.269535461682056,0.532895347815599,"MYO1C",1
GO:0045005,"GO:0045005","DNA-dependent DNA replication maintenance of fidelity","1/120","32/12302",0.269535461682056,0.269535461682056,0.532895347815599,"NUCKS1",1
GO:0051590,"GO:0051590","positive regulation of neurotransmitter transport","1/120","32/12302",0.269535461682056,0.269535461682056,0.532895347815599,"RAB3B",1
GO:0051973,"GO:0051973","positive regulation of telomerase activity","1/120","32/12302",0.269535461682056,0.269535461682056,0.532895347815599,"MYC",1
GO:0071548,"GO:0071548","response to dexamethasone","1/120","32/12302",0.269535461682056,0.269535461682056,0.532895347815599,"CASP9",1
GO:0090184,"GO:0090184","positive regulation of kidney development","1/120","32/12302",0.269535461682056,0.269535461682056,0.532895347815599,"MYC",1
GO:1902042,"GO:1902042","negative regulation of extrinsic apoptotic signaling pathway via death domain receptors","1/120","32/12302",0.269535461682056,0.269535461682056,0.532895347815599,"GPX1",1
GO:0035821,"GO:0035821","modification of morphology or physiology of other organism","2/120","104/12302",0.269592366090394,0.269592366090394,0.532895347815599,"HMGN2/NUCKS1",2
GO:0033044,"GO:0033044","regulation of chromosome organization","4/120","271/12302",0.272189829737953,0.272189829737953,0.532895347815599,"RIF1/MYC/ZNHIT1/ING2",4
GO:0070997,"GO:0070997","neuron death","4/120","271/12302",0.272189829737953,0.272189829737953,0.532895347815599,"CASP9/DDIT3/UBB/CASP3",4
GO:0046651,"GO:0046651","lymphocyte proliferation","3/120","186/12302",0.2725665436801,0.2725665436801,0.532895347815599,"PELI1/PRKAR1A/CASP3",3
GO:0030048,"GO:0030048","actin filament-based movement","2/120","105/12302",0.273213357897836,0.273213357897836,0.532895347815599,"MYO1C/PKP2",2
GO:0032273,"GO:0032273","positive regulation of protein polymerization","2/120","105/12302",0.273213357897836,0.273213357897836,0.532895347815599,"MYO1C/CARMIL1",2
GO:1902903,"GO:1902903","regulation of supramolecular fiber organization","4/120","272/12302",0.274356387743692,0.274356387743692,0.532895347815599,"PLEKHH2/GPX1/MYO1C/CARMIL1",4
GO:1903320,"GO:1903320","regulation of protein modification by small protein conjugation or removal","3/120","187/12302",0.27521415457264,0.27521415457264,0.532895347815599,"PELI1/UBB/VCP",3
GO:0007276,"GO:0007276","gamete generation","6/120","450/12302",0.275822515429095,0.275822515429095,0.532895347815599,"NECTIN2/DDX3X/CREM/UBB/ING2/PRKAR1A",6
GO:0002762,"GO:0002762","negative regulation of myeloid leukocyte differentiation","1/120","33/12302",0.276679369147268,0.276679369147268,0.532895347815599,"MYC",1
GO:0006195,"GO:0006195","purine nucleotide catabolic process","1/120","33/12302",0.276679369147268,0.276679369147268,0.532895347815599,"GPX1",1
GO:0006734,"GO:0006734","NADH metabolic process","1/120","33/12302",0.276679369147268,0.276679369147268,0.532895347815599,"VCP",1
GO:0010658,"GO:0010658","striated muscle cell apoptotic process","1/120","33/12302",0.276679369147268,0.276679369147268,0.532895347815599,"BMP7",1
GO:0010907,"GO:0010907","positive regulation of glucose metabolic process","1/120","33/12302",0.276679369147268,0.276679369147268,0.532895347815599,"SLC45A3",1
GO:0030810,"GO:0030810","positive regulation of nucleotide biosynthetic process","1/120","33/12302",0.276679369147268,0.276679369147268,0.532895347815599,"VCP",1
GO:0031062,"GO:0031062","positive regulation of histone methylation","1/120","33/12302",0.276679369147268,0.276679369147268,0.532895347815599,"RIF1",1
GO:0035094,"GO:0035094","response to nicotine","1/120","33/12302",0.276679369147268,0.276679369147268,0.532895347815599,"CASP3",1
GO:0042987,"GO:0042987","amyloid precursor protein catabolic process","1/120","33/12302",0.276679369147268,0.276679369147268,0.532895347815599,"CASP3",1
GO:0048247,"GO:0048247","lymphocyte chemotaxis","1/120","33/12302",0.276679369147268,0.276679369147268,0.532895347815599,"GAS6",1
GO:0050704,"GO:0050704","regulation of interleukin-1 secretion","1/120","33/12302",0.276679369147268,0.276679369147268,0.532895347815599,"GAS6",1
GO:0051339,"GO:0051339","regulation of lyase activity","1/120","33/12302",0.276679369147268,0.276679369147268,0.532895347815599,"GNAI3",1
GO:0071827,"GO:0071827","plasma lipoprotein particle organization","1/120","33/12302",0.276679369147268,0.276679369147268,0.532895347815599,"MTTP",1
GO:1900015,"GO:1900015","regulation of cytokine production involved in inflammatory response","1/120","33/12302",0.276679369147268,0.276679369147268,0.532895347815599,"IL17RC",1
GO:1900087,"GO:1900087","positive regulation of G1/S transition of mitotic cell cycle","1/120","33/12302",0.276679369147268,0.276679369147268,0.532895347815599,"DDX3X",1
GO:1900373,"GO:1900373","positive regulation of purine nucleotide biosynthetic process","1/120","33/12302",0.276679369147268,0.276679369147268,0.532895347815599,"VCP",1
GO:1903573,"GO:1903573","negative regulation of response to endoplasmic reticulum stress","1/120","33/12302",0.276679369147268,0.276679369147268,0.532895347815599,"SVIP",1
GO:1903580,"GO:1903580","positive regulation of ATP metabolic process","1/120","33/12302",0.276679369147268,0.276679369147268,0.532895347815599,"VCP",1
GO:0003206,"GO:0003206","cardiac chamber morphogenesis","2/120","106/12302",0.276833798772657,0.276833798772657,0.532895347815599,"PKP2/BMP7",2
GO:0035304,"GO:0035304","regulation of protein dephosphorylation","2/120","106/12302",0.276833798772657,0.276833798772657,0.532895347815599,"NUAK1/PPP1R16A",2
GO:1902107,"GO:1902107","positive regulation of leukocyte differentiation","2/120","106/12302",0.276833798772657,0.276833798772657,0.532895347815599,"EGR3/GAS6",2
GO:0006352,"GO:0006352","DNA-templated transcription, initiation","3/120","188/12302",0.277864542693861,0.277864542693861,0.532895347815599,"RARG/ESRRA/MAZ",3
GO:0032943,"GO:0032943","mononuclear cell proliferation","3/120","188/12302",0.277864542693861,0.277864542693861,0.532895347815599,"PELI1/PRKAR1A/CASP3",3
GO:0051054,"GO:0051054","positive regulation of DNA metabolic process","3/120","188/12302",0.277864542693861,0.277864542693861,0.532895347815599,"RIF1/MYC/SHLD1",3
GO:0045862,"GO:0045862","positive regulation of proteolysis","4/120","274/12302",0.278698532117082,0.278698532117082,0.532895347815599,"CASP9/MYC/DDX3X/VCP",4
GO:0002790,"GO:0002790","peptide secretion","6/120","452/12302",0.279176578813159,0.279176578813159,0.532895347815599,"RAB3B/IL17RC/PTPN23/FOXA2/GAS6/MTTP",6
GO:0055088,"GO:0055088","lipid homeostasis","2/120","107/12302",0.280453357564708,0.280453357564708,0.532895347815599,"TLCD1/MTTP",2
GO:0009743,"GO:0009743","response to carbohydrate","3/120","189/12302",0.280517556261461,0.280517556261461,0.532895347815599,"FOXA2/GAS6/CASP3",3
GO:0001505,"GO:0001505","regulation of neurotransmitter levels","4/120","275/12302",0.280873946274133,0.280873946274133,0.532895347815599,"RAB3B/PNKD/DPYD/CTBP2",4
GO:0042119,"GO:0042119","neutrophil activation","5/120","364/12302",0.28238728326752,0.28238728326752,0.532895347815599,"SVIP/NRAS/DDX3X/UBR4/VCP",5
GO:0072521,"GO:0072521","purine-containing compound metabolic process","6/120","454/12302",0.282540428689544,0.282540428689544,0.532895347815599,"GNAI3/GPX1/DPYD/MPC1/VCP/CARMIL1",6
GO:0048705,"GO:0048705","skeletal system morphogenesis","3/120","190/12302",0.283173044660614,0.283173044660614,0.532895347815599,"SP5/RARG/BMP7",3
GO:0002437,"GO:0002437","inflammatory response to antigenic stimulus","1/120","34/12302",0.283753986125207,0.283753986125207,0.532895347815599,"GPX1",1
GO:0006308,"GO:0006308","DNA catabolic process","1/120","34/12302",0.283753986125207,0.283753986125207,0.532895347815599,"CASP3",1
GO:0030225,"GO:0030225","macrophage differentiation","1/120","34/12302",0.283753986125207,0.283753986125207,0.532895347815599,"EIF2AK1",1
GO:0030501,"GO:0030501","positive regulation of bone mineralization","1/120","34/12302",0.283753986125207,0.283753986125207,0.532895347815599,"BMP7",1
GO:0031641,"GO:0031641","regulation of myelination","1/120","34/12302",0.283753986125207,0.283753986125207,0.532895347815599,"RARG",1
GO:0032757,"GO:0032757","positive regulation of interleukin-8 production","1/120","34/12302",0.283753986125207,0.283753986125207,0.532895347815599,"DDIT3",1
GO:0035176,"GO:0035176","social behavior","1/120","34/12302",0.283753986125207,0.283753986125207,0.532895347815599,"PCM1",1
GO:0038179,"GO:0038179","neurotrophin signaling pathway","1/120","34/12302",0.283753986125207,0.283753986125207,0.532895347815599,"CASP3",1
GO:0043331,"GO:0043331","response to dsRNA","1/120","34/12302",0.283753986125207,0.283753986125207,0.532895347815599,"PELI1",1
GO:0044331,"GO:0044331","cell-cell adhesion mediated by cadherin","1/120","34/12302",0.283753986125207,0.283753986125207,0.532895347815599,"FOXA2",1
GO:0048066,"GO:0048066","developmental pigmentation","1/120","34/12302",0.283753986125207,0.283753986125207,0.532895347815599,"MREG",1
GO:0048255,"GO:0048255","mRNA stabilization","1/120","34/12302",0.283753986125207,0.283753986125207,0.532895347815599,"LARP1",1
GO:0051703,"GO:0051703","intraspecies interaction between organisms","1/120","34/12302",0.283753986125207,0.283753986125207,0.532895347815599,"PCM1",1
GO:0097035,"GO:0097035","regulation of membrane lipid distribution","1/120","34/12302",0.283753986125207,0.283753986125207,0.532895347815599,"TLCD1",1
GO:0097352,"GO:0097352","autophagosome maturation","1/120","34/12302",0.283753986125207,0.283753986125207,0.532895347815599,"VCP",1
GO:1901658,"GO:1901658","glycosyl compound catabolic process","1/120","34/12302",0.283753986125207,0.283753986125207,0.532895347815599,"DPYD",1
GO:1902743,"GO:1902743","regulation of lamellipodium organization","1/120","34/12302",0.283753986125207,0.283753986125207,0.532895347815599,"CARMIL1",1
GO:1904707,"GO:1904707","positive regulation of vascular smooth muscle cell proliferation","1/120","34/12302",0.283753986125207,0.283753986125207,0.532895347815599,"GNAI3",1
GO:0051384,"GO:0051384","response to glucocorticoid","2/120","108/12302",0.284071709529156,0.284071709529156,0.532895347815599,"CASP9/CASP3",2
GO:0051402,"GO:0051402","neuron apoptotic process","3/120","191/12302",0.285830858450037,0.285830858450037,0.532895347815599,"CASP9/DDIT3/CASP3",3
GO:0032635,"GO:0032635","interleukin-6 production","2/120","109/12302",0.287688536234834,0.287688536234834,0.532895347815599,"IL17RC/GAS6",2
GO:0042157,"GO:0042157","lipoprotein metabolic process","2/120","109/12302",0.287688536234834,0.287688536234834,0.532895347815599,"SVIP/MTTP",2
GO:0071333,"GO:0071333","cellular response to glucose stimulus","2/120","109/12302",0.287688536234834,0.287688536234834,0.532895347815599,"FOXA2/GAS6",2
GO:0031330,"GO:0031330","negative regulation of cellular catabolic process","3/120","192/12302",0.288490849367716,0.288490849367716,0.532895347815599,"SVIP/NBAS/LARP1",3
GO:0042593,"GO:0042593","glucose homeostasis","3/120","192/12302",0.288490849367716,0.288490849367716,0.532895347815599,"NUCKS1/FOXA2/GAS6",3
GO:0060271,"GO:0060271","cilium assembly","4/120","279/12302",0.289602554071728,0.289602554071728,0.532895347815599,"BBS10/PCM1/PTPN23/IFT122",4
GO:0002446,"GO:0002446","neutrophil mediated immunity","5/120","368/12302",0.289949976680068,0.289949976680068,0.532895347815599,"SVIP/NRAS/DDX3X/UBR4/VCP",5
GO:0036230,"GO:0036230","granulocyte activation","5/120","368/12302",0.289949976680068,0.289949976680068,0.532895347815599,"SVIP/NRAS/DDX3X/UBR4/VCP",5
GO:0001504,"GO:0001504","neurotransmitter uptake","1/120","35/12302",0.29075997908779,0.29075997908779,0.532895347815599,"RAB3B",1
GO:0010656,"GO:0010656","negative regulation of muscle cell apoptotic process","1/120","35/12302",0.29075997908779,0.29075997908779,0.532895347815599,"BMP7",1
GO:0010862,"GO:0010862","positive regulation of pathway-restricted SMAD protein phosphorylation","1/120","35/12302",0.29075997908779,0.29075997908779,0.532895347815599,"BMP7",1
GO:0016572,"GO:0016572","histone phosphorylation","1/120","35/12302",0.29075997908779,0.29075997908779,0.532895347815599,"DCAF1",1
GO:0017001,"GO:0017001","antibiotic catabolic process","1/120","35/12302",0.29075997908779,0.29075997908779,0.532895347815599,"GPX1",1
GO:0017145,"GO:0017145","stem cell division","1/120","35/12302",0.29075997908779,0.29075997908779,0.532895347815599,"ING2",1
GO:0031122,"GO:0031122","cytoplasmic microtubule organization","1/120","35/12302",0.29075997908779,0.29075997908779,0.532895347815599,"PCM1",1
GO:0035136,"GO:0035136","forelimb morphogenesis","1/120","35/12302",0.29075997908779,0.29075997908779,0.532895347815599,"IFT122",1
GO:0038202,"GO:0038202","TORC1 signaling","1/120","35/12302",0.29075997908779,0.29075997908779,0.532895347815599,"LARP1",1
GO:0042149,"GO:0042149","cellular response to glucose starvation","1/120","35/12302",0.29075997908779,0.29075997908779,0.532895347815599,"TBL2",1
GO:0042267,"GO:0042267","natural killer cell mediated cytotoxicity","1/120","35/12302",0.29075997908779,0.29075997908779,0.532895347815599,"NECTIN2",1
GO:0042743,"GO:0042743","hydrogen peroxide metabolic process","1/120","35/12302",0.29075997908779,0.29075997908779,0.532895347815599,"GPX1",1
GO:0042769,"GO:0042769","DNA damage response, detection of DNA damage","1/120","35/12302",0.29075997908779,0.29075997908779,0.532895347815599,"UBB",1
GO:0043277,"GO:0043277","apoptotic cell clearance","1/120","35/12302",0.29075997908779,0.29075997908779,0.532895347815599,"GAS6",1
GO:0045104,"GO:0045104","intermediate filament cytoskeleton organization","1/120","35/12302",0.29075997908779,0.29075997908779,0.532895347815599,"PKP2",1
GO:0070266,"GO:0070266","necroptotic process","1/120","35/12302",0.29075997908779,0.29075997908779,0.532895347815599,"PELI1",1
GO:0086004,"GO:0086004","regulation of cardiac muscle cell contraction","1/120","35/12302",0.29075997908779,0.29075997908779,0.532895347815599,"PKP2",1
GO:0090317,"GO:0090317","negative regulation of intracellular protein transport","1/120","35/12302",0.29075997908779,0.29075997908779,0.532895347815599,"SVIP",1
GO:0090382,"GO:0090382","phagosome maturation","1/120","35/12302",0.29075997908779,0.29075997908779,0.532895347815599,"MREG",1
GO:2000107,"GO:2000107","negative regulation of leukocyte apoptotic process","1/120","35/12302",0.29075997908779,0.29075997908779,0.532895347815599,"GAS6",1
GO:0033500,"GO:0033500","carbohydrate homeostasis","3/120","193/12302",0.291152870336266,0.291152870336266,0.532895347815599,"NUCKS1/FOXA2/GAS6",3
GO:0030879,"GO:0030879","mammary gland development","2/120","110/12302",0.291303525473761,0.291303525473761,0.532895347815599,"GPX1/IQGAP3",2
GO:0051588,"GO:0051588","regulation of neurotransmitter transport","2/120","110/12302",0.291303525473761,0.291303525473761,0.532895347815599,"RAB3B/PNKD",2
GO:1902904,"GO:1902904","negative regulation of supramolecular fiber organization","2/120","110/12302",0.291303525473761,0.291303525473761,0.532895347815599,"PLEKHH2/CARMIL1",2
GO:0071417,"GO:0071417","cellular response to organonitrogen compound","6/120","461/12302",0.294386425860618,0.294386425860618,0.538092896634005,"MYO1C/NUCKS1/LARP1/ESRRA/PRKAR1A/CASP3",6
GO:0071331,"GO:0071331","cellular response to hexose stimulus","2/120","111/12302",0.294916371171789,0.294916371171789,0.538619338567707,"FOXA2/GAS6",2
GO:0001961,"GO:0001961","positive regulation of cytokine-mediated signaling pathway","1/120","36/12302",0.297698008150272,0.297698008150272,0.538836256401174,"GAS6",1
GO:0002534,"GO:0002534","cytokine production involved in inflammatory response","1/120","36/12302",0.297698008150272,0.297698008150272,0.538836256401174,"IL17RC",1
GO:0007257,"GO:0007257","activation of JUN kinase activity","1/120","36/12302",0.297698008150272,0.297698008150272,0.538836256401174,"MAP3K6",1
GO:0018023,"GO:0018023","peptidyl-lysine trimethylation","1/120","36/12302",0.297698008150272,0.297698008150272,0.538836256401174,"EEF2KMT",1
GO:0032648,"GO:0032648","regulation of interferon-beta production","1/120","36/12302",0.297698008150272,0.297698008150272,0.538836256401174,"DDX3X",1
GO:0032715,"GO:0032715","negative regulation of interleukin-6 production","1/120","36/12302",0.297698008150272,0.297698008150272,0.538836256401174,"GAS6",1
GO:0032722,"GO:0032722","positive regulation of chemokine production","1/120","36/12302",0.297698008150272,0.297698008150272,0.538836256401174,"DDX3X",1
GO:0045103,"GO:0045103","intermediate filament-based process","1/120","36/12302",0.297698008150272,0.297698008150272,0.538836256401174,"PKP2",1
GO:0045599,"GO:0045599","negative regulation of fat cell differentiation","1/120","36/12302",0.297698008150272,0.297698008150272,0.538836256401174,"DDIT3",1
GO:1990928,"GO:1990928","response to amino acid starvation","1/120","36/12302",0.297698008150272,0.297698008150272,0.538836256401174,"LARP1",1
GO:2000826,"GO:2000826","regulation of heart morphogenesis","1/120","36/12302",0.297698008150272,0.297698008150272,0.538836256401174,"BMP7",1
GO:0071326,"GO:0071326","cellular response to monosaccharide stimulus","2/120","112/12302",0.298526773300382,0.298526773300382,0.538836256401174,"FOXA2/GAS6",2
GO:0072006,"GO:0072006","nephron development","2/120","112/12302",0.298526773300382,0.298526773300382,0.538836256401174,"MYC/BMP7",2
GO:0072073,"GO:0072073","kidney epithelium development","2/120","112/12302",0.298526773300382,0.298526773300382,0.538836256401174,"MYC/BMP7",2
GO:0019318,"GO:0019318","hexose metabolic process","3/120","196/12302",0.299149660645985,0.299149660645985,0.538836256401174,"CREM/FOXA2/SLC45A3",3
GO:0043542,"GO:0043542","endothelial cell migration","3/120","196/12302",0.299149660645985,0.299149660645985,0.538836256401174,"GPX1/PRKX/EGR3",3
GO:0046777,"GO:0046777","protein autophosphorylation","3/120","196/12302",0.299149660645985,0.299149660645985,0.538836256401174,"PRKX/TNKS1BP1/EIF2AK1",3
GO:0002757,"GO:0002757","immune response-activating signal transduction","5/120","373/12302",0.299456074675637,0.299456074675637,0.538952132016315,"NECTIN2/PELI1/NRAS/MYO1C/UBB",5
GO:0010675,"GO:0010675","regulation of cellular carbohydrate metabolic process","2/120","113/12302",0.30213443778951,0.30213443778951,0.539861597286973,"FOXA2/SLC45A3",2
GO:0048754,"GO:0048754","branching morphogenesis of an epithelial tube","2/120","113/12302",0.30213443778951,0.30213443778951,0.539861597286973,"MYC/BMP7",2
GO:0045165,"GO:0045165","cell fate commitment","3/120","198/12302",0.304488361763113,0.304488361763113,0.539861597286973,"FOXA2/SOX12/CASP3",3
GO:0002063,"GO:0002063","chondrocyte development","1/120","37/12302",0.304568727131355,0.304568727131355,0.539861597286973,"RARG",1
GO:0002228,"GO:0002228","natural killer cell mediated immunity","1/120","37/12302",0.304568727131355,0.304568727131355,0.539861597286973,"NECTIN2",1
GO:0002833,"GO:0002833","positive regulation of response to biotic stimulus","1/120","37/12302",0.304568727131355,0.304568727131355,0.539861597286973,"NECTIN2",1
GO:0008631,"GO:0008631","intrinsic apoptotic signaling pathway in response to oxidative stress","1/120","37/12302",0.304568727131355,0.304568727131355,0.539861597286973,"GPX1",1
GO:0015872,"GO:0015872","dopamine transport","1/120","37/12302",0.304568727131355,0.304568727131355,0.539861597286973,"RAB3B",1
GO:0021532,"GO:0021532","neural tube patterning","1/120","37/12302",0.304568727131355,0.304568727131355,0.539861597286973,"IFT122",1
GO:0032456,"GO:0032456","endocytic recycling","1/120","37/12302",0.304568727131355,0.304568727131355,0.539861597286973,"PTPN23",1
GO:0032480,"GO:0032480","negative regulation of type I interferon production","1/120","37/12302",0.304568727131355,0.304568727131355,0.539861597286973,"OTUD5",1
GO:0035850,"GO:0035850","epithelial cell differentiation involved in kidney development","1/120","37/12302",0.304568727131355,0.304568727131355,0.539861597286973,"PRKX",1
GO:0043489,"GO:0043489","RNA stabilization","1/120","37/12302",0.304568727131355,0.304568727131355,0.539861597286973,"LARP1",1
GO:0045912,"GO:0045912","negative regulation of carbohydrate metabolic process","1/120","37/12302",0.304568727131355,0.304568727131355,0.539861597286973,"FOXA2",1
GO:0050435,"GO:0050435","amyloid-beta metabolic process","1/120","37/12302",0.304568727131355,0.304568727131355,0.539861597286973,"CASP3",1
GO:0050885,"GO:0050885","neuromuscular process controlling balance","1/120","37/12302",0.304568727131355,0.304568727131355,0.539861597286973,"TPP1",1
GO:0061647,"GO:0061647","histone H3-K9 modification","1/120","37/12302",0.304568727131355,0.304568727131355,0.539861597286973,"RIF1",1
GO:0061844,"GO:0061844","antimicrobial humoral immune response mediated by antimicrobial peptide","1/120","37/12302",0.304568727131355,0.304568727131355,0.539861597286973,"HMGN2",1
GO:0071825,"GO:0071825","protein-lipid complex subunit organization","1/120","37/12302",0.304568727131355,0.304568727131355,0.539861597286973,"MTTP",1
GO:0002224,"GO:0002224","toll-like receptor signaling pathway","2/120","114/12302",0.305739076441642,0.305739076441642,0.540644744512414,"PELI1/UBB",2
GO:0051494,"GO:0051494","negative regulation of cytoskeleton organization","2/120","114/12302",0.305739076441642,0.305739076441642,0.540644744512414,"PLEKHH2/CARMIL1",2
GO:0090263,"GO:0090263","positive regulation of canonical Wnt signaling pathway","2/120","114/12302",0.305739076441642,0.305739076441642,0.540644744512414,"DDX3X/VCP",2
GO:0001837,"GO:0001837","epithelial to mesenchymal transition","2/120","115/12302",0.309340406846828,0.309340406846828,0.544599964789923,"FOXA2/BMP7",2
GO:0042542,"GO:0042542","response to hydrogen peroxide","2/120","115/12302",0.309340406846828,0.309340406846828,0.544599964789923,"GPX1/CASP3",2
GO:0051668,"GO:0051668","localization within membrane","2/120","115/12302",0.309340406846828,0.309340406846828,0.544599964789923,"IFT122/LRP4",2
GO:0035690,"GO:0035690","cellular response to drug","4/120","288/12302",0.309376587228876,0.309376587228876,0.544599964789923,"CASP9/MYC/GAS6/LARP1",4
GO:0032608,"GO:0032608","interferon-beta production","1/120","38/12302",0.311372783612744,0.311372783612744,0.544599964789923,"DDX3X",1
GO:0034656,"GO:0034656","nucleobase-containing small molecule catabolic process","1/120","38/12302",0.311372783612744,0.311372783612744,0.544599964789923,"DPYD",1
GO:0045661,"GO:0045661","regulation of myoblast differentiation","1/120","38/12302",0.311372783612744,0.311372783612744,0.544599964789923,"DDIT3",1
GO:0060711,"GO:0060711","labyrinthine layer development","1/120","38/12302",0.311372783612744,0.311372783612744,0.544599964789923,"BMP7",1
GO:0061383,"GO:0061383","trabecula morphogenesis","1/120","38/12302",0.311372783612744,0.311372783612744,0.544599964789923,"BMP7",1
GO:0070534,"GO:0070534","protein K63-linked ubiquitination","1/120","38/12302",0.311372783612744,0.311372783612744,0.544599964789923,"PELI1",1
GO:0090503,"GO:0090503","RNA phosphodiester bond hydrolysis, exonucleolytic","1/120","38/12302",0.311372783612744,0.311372783612744,0.544599964789923,"EXOSC9",1
GO:1901068,"GO:1901068","guanosine-containing compound metabolic process","1/120","38/12302",0.311372783612744,0.311372783612744,0.544599964789923,"GNAI3",1
GO:1903115,"GO:1903115","regulation of actin filament-based movement","1/120","38/12302",0.311372783612744,0.311372783612744,0.544599964789923,"PKP2",1
GO:0062013,"GO:0062013","positive regulation of small molecule metabolic process","2/120","116/12302",0.312938152298858,0.312938152298858,0.544599964789923,"VCP/SLC45A3",2
GO:0031331,"GO:0031331","positive regulation of cellular catabolic process","4/120","291/12302",0.316001417992192,0.316001417992192,0.544599964789923,"GNAI3/SVIP/LARP1/VCP",4
GO:0009267,"GO:0009267","cellular response to starvation","2/120","117/12302",0.316532041712476,0.316532041712476,0.544599964789923,"TBL2/GAS6",2
GO:0007548,"GO:0007548","sex differentiation","3/120","203/12302",0.317853231881579,0.317853231881579,0.544599964789923,"UBB/ING2/CASP3",3
GO:0003416,"GO:0003416","endochondral bone growth","1/120","39/12302",0.318110818998138,0.318110818998138,0.544599964789923,"RARG",1
GO:0008038,"GO:0008038","neuron recognition","1/120","39/12302",0.318110818998138,0.318110818998138,0.544599964789923,"CASP3",1
GO:0016574,"GO:0016574","histone ubiquitination","1/120","39/12302",0.318110818998138,0.318110818998138,0.544599964789923,"DDB2",1
GO:0021879,"GO:0021879","forebrain neuron differentiation","1/120","39/12302",0.318110818998138,0.318110818998138,0.544599964789923,"UBB",1
GO:0022602,"GO:0022602","ovulation cycle process","1/120","39/12302",0.318110818998138,0.318110818998138,0.544599964789923,"CASP3",1
GO:0031343,"GO:0031343","positive regulation of cell killing","1/120","39/12302",0.318110818998138,0.318110818998138,0.544599964789923,"NECTIN2",1
GO:0031952,"GO:0031952","regulation of protein autophosphorylation","1/120","39/12302",0.318110818998138,0.318110818998138,0.544599964789923,"TNKS1BP1",1
GO:0032873,"GO:0032873","negative regulation of stress-activated MAPK cascade","1/120","39/12302",0.318110818998138,0.318110818998138,0.544599964789923,"MYC",1
GO:0035272,"GO:0035272","exocrine system development","1/120","39/12302",0.318110818998138,0.318110818998138,0.544599964789923,"BMP7",1
GO:0045746,"GO:0045746","negative regulation of Notch signaling pathway","1/120","39/12302",0.318110818998138,0.318110818998138,0.544599964789923,"BMP7",1
GO:0050701,"GO:0050701","interleukin-1 secretion","1/120","39/12302",0.318110818998138,0.318110818998138,0.544599964789923,"GAS6",1
GO:0051353,"GO:0051353","positive regulation of oxidoreductase activity","1/120","39/12302",0.318110818998138,0.318110818998138,0.544599964789923,"GNAI3",1
GO:0051445,"GO:0051445","regulation of meiotic cell cycle","1/120","39/12302",0.318110818998138,0.318110818998138,0.544599964789923,"PRKAR1A",1
GO:0070303,"GO:0070303","negative regulation of stress-activated protein kinase signaling cascade","1/120","39/12302",0.318110818998138,0.318110818998138,0.544599964789923,"MYC",1
GO:0090199,"GO:0090199","regulation of release of cytochrome c from mitochondria","1/120","39/12302",0.318110818998138,0.318110818998138,0.544599964789923,"GPX1",1
GO:1900024,"GO:1900024","regulation of substrate adhesion-dependent cell spreading","1/120","39/12302",0.318110818998138,0.318110818998138,0.544599964789923,"CARMIL1",1
GO:2000059,"GO:2000059","negative regulation of ubiquitin-dependent protein catabolic process","1/120","39/12302",0.318110818998138,0.318110818998138,0.544599964789923,"SVIP",1
GO:2000351,"GO:2000351","regulation of endothelial cell apoptotic process","1/120","39/12302",0.318110818998138,0.318110818998138,0.544599964789923,"GAS6",1
GO:0000077,"GO:0000077","DNA damage checkpoint","2/120","118/12302",0.320121809541656,0.320121809541656,0.544599964789923,"CNOT4/TNKS1BP1",2
GO:0051053,"GO:0051053","negative regulation of DNA metabolic process","2/120","118/12302",0.320121809541656,0.320121809541656,0.544599964789923,"RIF1/SHLD1",2
GO:0042254,"GO:0042254","ribosome biogenesis","3/120","204/12302",0.320528219484901,0.320528219484901,0.544599964789923,"EXOSC9/DDX3X/MRM2",3
GO:0110053,"GO:0110053","regulation of actin filament organization","3/120","204/12302",0.320528219484901,0.320528219484901,0.544599964789923,"PLEKHH2/MYO1C/CARMIL1",3
GO:0002274,"GO:0002274","myeloid leukocyte activation","6/120","477/12302",0.321826463416529,0.321826463416529,0.544599964789923,"NECTIN2/SVIP/NRAS/DDX3X/UBR4/VCP",6
GO:0060326,"GO:0060326","cell chemotaxis","3/120","205/12302",0.323203566118165,0.323203566118165,0.544599964789923,"IL17RC/EGR3/GAS6",3
GO:0070661,"GO:0070661","leukocyte proliferation","3/120","205/12302",0.323203566118165,0.323203566118165,0.544599964789923,"PELI1/PRKAR1A/CASP3",3
GO:0072659,"GO:0072659","protein localization to plasma membrane","3/120","205/12302",0.323203566118165,0.323203566118165,0.544599964789923,"RAB3B/PKP2/GAS6",3
GO:0002285,"GO:0002285","lymphocyte activation involved in immune response","2/120","119/12302",0.323707195698906,0.323707195698906,0.544599964789923,"RIF1/SHLD1",2
GO:0030509,"GO:0030509","BMP signaling pathway","2/120","119/12302",0.323707195698906,0.323707195698906,0.544599964789923,"FAM83G/BMP7",2
GO:0043901,"GO:0043901","negative regulation of multi-organism process","2/120","119/12302",0.323707195698906,0.323707195698906,0.544599964789923,"FAM111A/SNX3",2
GO:0046661,"GO:0046661","male sex differentiation","2/120","119/12302",0.323707195698906,0.323707195698906,0.544599964789923,"UBB/ING2",2
GO:0071322,"GO:0071322","cellular response to carbohydrate stimulus","2/120","119/12302",0.323707195698906,0.323707195698906,0.544599964789923,"FOXA2/GAS6",2
GO:0002067,"GO:0002067","glandular epithelial cell differentiation","1/120","40/12302",0.324783468571671,0.324783468571671,0.544599964789923,"RARG",1
GO:0002931,"GO:0002931","response to ischemia","1/120","40/12302",0.324783468571671,0.324783468571671,0.544599964789923,"CASP9",1
GO:0003197,"GO:0003197","endocardial cushion development","1/120","40/12302",0.324783468571671,0.324783468571671,0.544599964789923,"BMP7",1
GO:0006584,"GO:0006584","catecholamine metabolic process","1/120","40/12302",0.324783468571671,0.324783468571671,0.544599964789923,"PNKD",1
GO:0009712,"GO:0009712","catechol-containing compound metabolic process","1/120","40/12302",0.324783468571671,0.324783468571671,0.544599964789923,"PNKD",1
GO:0010171,"GO:0010171","body morphogenesis","1/120","40/12302",0.324783468571671,0.324783468571671,0.544599964789923,"IFT122",1
GO:0031648,"GO:0031648","protein destabilization","1/120","40/12302",0.324783468571671,0.324783468571671,0.544599964789923,"ISOC2",1
GO:0033013,"GO:0033013","tetrapyrrole metabolic process","1/120","40/12302",0.324783468571671,0.324783468571671,0.544599964789923,"EIF2AK1",1
GO:0033059,"GO:0033059","cellular pigmentation","1/120","40/12302",0.324783468571671,0.324783468571671,0.544599964789923,"MREG",1
GO:0045214,"GO:0045214","sarcomere organization","1/120","40/12302",0.324783468571671,0.324783468571671,0.544599964789923,"PRKAR1A",1
GO:0045839,"GO:0045839","negative regulation of mitotic nuclear division","1/120","40/12302",0.324783468571671,0.324783468571671,0.544599964789923,"BMP7",1
GO:0045981,"GO:0045981","positive regulation of nucleotide metabolic process","1/120","40/12302",0.324783468571671,0.324783468571671,0.544599964789923,"VCP",1
GO:0051496,"GO:0051496","positive regulation of stress fiber assembly","1/120","40/12302",0.324783468571671,0.324783468571671,0.544599964789923,"CARMIL1",1
GO:0055010,"GO:0055010","ventricular cardiac muscle tissue morphogenesis","1/120","40/12302",0.324783468571671,0.324783468571671,0.544599964789923,"PKP2",1
GO:0060324,"GO:0060324","face development","1/120","40/12302",0.324783468571671,0.324783468571671,0.544599964789923,"RARG",1
GO:0060688,"GO:0060688","regulation of morphogenesis of a branching structure","1/120","40/12302",0.324783468571671,0.324783468571671,0.544599964789923,"BMP7",1
GO:0070169,"GO:0070169","positive regulation of biomineral tissue development","1/120","40/12302",0.324783468571671,0.324783468571671,0.544599964789923,"BMP7",1
GO:0072698,"GO:0072698","protein localization to microtubule cytoskeleton","1/120","40/12302",0.324783468571671,0.324783468571671,0.544599964789923,"PCM1",1
GO:0097300,"GO:0097300","programmed necrotic cell death","1/120","40/12302",0.324783468571671,0.324783468571671,0.544599964789923,"PELI1",1
GO:1900544,"GO:1900544","positive regulation of purine nucleotide metabolic process","1/120","40/12302",0.324783468571671,0.324783468571671,0.544599964789923,"VCP",1
GO:0042692,"GO:0042692","muscle cell differentiation","4/120","295/12302",0.324854522732372,0.324854522732372,0.544599964789923,"GPX1/BCL9/PRKAR1A/CASP3",4
GO:0006836,"GO:0006836","neurotransmitter transport","3/120","206/12302",0.325879140445974,0.325879140445974,0.545496147244349,"RAB3B/PNKD/CTBP2",3
GO:0031668,"GO:0031668","cellular response to extracellular stimulus","3/120","206/12302",0.325879140445974,0.325879140445974,0.545496147244349,"TBL2/FOXA2/GAS6",3
GO:2000058,"GO:2000058","regulation of ubiquitin-dependent protein catabolic process","2/120","120/12302",0.327287945475603,0.327287945475603,0.547442765376962,"SVIP/VCP",2
GO:0007519,"GO:0007519","skeletal muscle tissue development","2/120","121/12302",0.330863809463335,0.330863809463335,0.548129138727236,"GPX1/BCL9",2
GO:0031960,"GO:0031960","response to corticosteroid","2/120","121/12302",0.330863809463335,0.330863809463335,0.548129138727236,"CASP9/CASP3",2
GO:0045216,"GO:0045216","cell-cell junction organization","2/120","121/12302",0.330863809463335,0.330863809463335,0.548129138727236,"MYO1C/PKP2",2
GO:0007528,"GO:0007528","neuromuscular junction development","1/120","41/12302",0.3313913615558,0.3313913615558,0.548129138727236,"LRP4",1
GO:0018198,"GO:0018198","peptidyl-cysteine modification","1/120","41/12302",0.3313913615558,0.3313913615558,0.548129138727236,"RAB3B",1
GO:0032330,"GO:0032330","regulation of chondrocyte differentiation","1/120","41/12302",0.3313913615558,0.3313913615558,0.548129138727236,"RARG",1
GO:0042255,"GO:0042255","ribosome assembly","1/120","41/12302",0.3313913615558,0.3313913615558,0.548129138727236,"DDX3X",1
GO:0043392,"GO:0043392","negative regulation of DNA binding","1/120","41/12302",0.3313913615558,0.3313913615558,0.548129138727236,"DDIT3",1
GO:0051972,"GO:0051972","regulation of telomerase activity","1/120","41/12302",0.3313913615558,0.3313913615558,0.548129138727236,"MYC",1
GO:0060351,"GO:0060351","cartilage development involved in endochondral bone morphogenesis","1/120","41/12302",0.3313913615558,0.3313913615558,0.548129138727236,"RARG",1
GO:0060760,"GO:0060760","positive regulation of response to cytokine stimulus","1/120","41/12302",0.3313913615558,0.3313913615558,0.548129138727236,"GAS6",1
GO:0070741,"GO:0070741","response to interleukin-6","1/120","41/12302",0.3313913615558,0.3313913615558,0.548129138727236,"FOXA2",1
GO:0099518,"GO:0099518","vesicle cytoskeletal trafficking","1/120","41/12302",0.3313913615558,0.3313913615558,0.548129138727236,"MYO1C",1
GO:0120163,"GO:0120163","negative regulation of cold-induced thermogenesis","1/120","41/12302",0.3313913615558,0.3313913615558,0.548129138727236,"DDIT3",1
GO:2000677,"GO:2000677","regulation of transcription regulatory region DNA binding","1/120","41/12302",0.3313913615558,0.3313913615558,0.548129138727236,"DDIT3",1
GO:0043299,"GO:0043299","leukocyte degranulation","5/120","390/12302",0.332126636567787,0.332126636567787,0.548937472231367,"SVIP/NRAS/DDX3X/UBR4/VCP",5
GO:0090596,"GO:0090596","sensory organ morphogenesis","3/120","209/12302",0.333905934651008,0.333905934651008,0.551115399471954,"RARG/BMP7/IFT122",3
GO:0016482,"GO:0016482","cytosolic transport","2/120","122/12302",0.334434543476255,0.334434543476255,0.551115399471954,"PTPN23/SNX3",2
GO:0031214,"GO:0031214","biomineral tissue development","2/120","122/12302",0.334434543476255,0.334434543476255,0.551115399471954,"BMP7/GAS6",2
GO:1901657,"GO:1901657","glycosyl compound metabolic process","2/120","122/12302",0.334434543476255,0.334434543476255,0.551115399471954,"GNAI3/DPYD",2
GO:0002758,"GO:0002758","innate immune response-activating signal transduction","3/120","210/12302",0.336581130952771,0.336581130952771,0.552086964840243,"PELI1/NRAS/UBB",3
GO:0002709,"GO:0002709","regulation of T cell mediated immunity","1/120","42/12302",0.337935121168662,0.337935121168662,0.552086964840243,"NECTIN2",1
GO:0006984,"GO:0006984","ER-nucleus signaling pathway","1/120","42/12302",0.337935121168662,0.337935121168662,0.552086964840243,"DDIT3",1
GO:0031018,"GO:0031018","endocrine pancreas development","1/120","42/12302",0.337935121168662,0.337935121168662,0.552086964840243,"FOXA2",1
GO:0051290,"GO:0051290","protein heterotetramerization","1/120","42/12302",0.337935121168662,0.337935121168662,0.552086964840243,"LRP4",1
GO:0051705,"GO:0051705","multi-organism behavior","1/120","42/12302",0.337935121168662,0.337935121168662,0.552086964840243,"PCM1",1
GO:0070830,"GO:0070830","bicellular tight junction assembly","1/120","42/12302",0.337935121168662,0.337935121168662,0.552086964840243,"MYO1C",1
GO:0098868,"GO:0098868","bone growth","1/120","42/12302",0.337935121168662,0.337935121168662,0.552086964840243,"RARG",1
GO:1901799,"GO:1901799","negative regulation of proteasomal protein catabolic process","1/120","42/12302",0.337935121168662,0.337935121168662,0.552086964840243,"SVIP",1
GO:1902808,"GO:1902808","positive regulation of cell cycle G1/S phase transition","1/120","42/12302",0.337935121168662,0.337935121168662,0.552086964840243,"DDX3X",1
GO:0030307,"GO:0030307","positive regulation of cell growth","2/120","123/12302",0.337999908474415,0.337999908474415,0.552086964840243,"EXOSC9/DDX3X",2
GO:0055002,"GO:0055002","striated muscle cell development","2/120","123/12302",0.337999908474415,0.337999908474415,0.552086964840243,"GPX1/PRKAR1A",2
GO:0090287,"GO:0090287","regulation of cellular response to growth factor stimulus","3/120","211/12302",0.339255916689946,0.339255916689946,0.553732260996478,"MYO1C/UBB/ING2",3
GO:0001764,"GO:0001764","neuron migration","2/120","124/12302",0.341559670488084,0.341559670488084,0.556676198722585,"PCM1/GAS6",2
GO:0030833,"GO:0030833","regulation of actin filament polymerization","2/120","124/12302",0.341559670488084,0.341559670488084,0.556676198722585,"MYO1C/CARMIL1",2
GO:0072593,"GO:0072593","reactive oxygen species metabolic process","3/120","212/12302",0.341930167897386,0.341930167897386,0.556872371387958,"GNAI3/GPX1/BMP7",3
GO:0010803,"GO:0010803","regulation of tumor necrosis factor-mediated signaling pathway","1/120","43/12302",0.344415364680878,0.344415364680878,0.55725099166161,"GAS6",1
GO:0010823,"GO:0010823","negative regulation of mitochondrion organization","1/120","43/12302",0.344415364680878,0.344415364680878,0.55725099166161,"GPX1",1
GO:0030837,"GO:0030837","negative regulation of actin filament polymerization","1/120","43/12302",0.344415364680878,0.344415364680878,0.55725099166161,"CARMIL1",1
GO:0042304,"GO:0042304","regulation of fatty acid biosynthetic process","1/120","43/12302",0.344415364680878,0.344415364680878,0.55725099166161,"SLC45A3",1
GO:0044380,"GO:0044380","protein localization to cytoskeleton","1/120","43/12302",0.344415364680878,0.344415364680878,0.55725099166161,"PCM1",1
GO:0061077,"GO:0061077","chaperone-mediated protein folding","1/120","43/12302",0.344415364680878,0.344415364680878,0.55725099166161,"UNC45A",1
GO:0072577,"GO:0072577","endothelial cell apoptotic process","1/120","43/12302",0.344415364680878,0.344415364680878,0.55725099166161,"GAS6",1
GO:0120192,"GO:0120192","tight junction assembly","1/120","43/12302",0.344415364680878,0.344415364680878,0.55725099166161,"MYO1C",1
GO:1903202,"GO:1903202","negative regulation of oxidative stress-induced cell death","1/120","43/12302",0.344415364680878,0.344415364680878,0.55725099166161,"GPX1",1
GO:0043534,"GO:0043534","blood vessel endothelial cell migration","2/120","125/12302",0.345113600543029,0.345113600543029,0.557975205556325,"GPX1/EGR3",2
GO:0002275,"GO:0002275","myeloid cell activation involved in immune response","5/120","397/12302",0.3456929432853,0.3456929432853,0.558101274797458,"SVIP/NRAS/DDX3X/UBR4/VCP",5
GO:0002764,"GO:0002764","immune response-regulating signaling pathway","5/120","397/12302",0.3456929432853,0.3456929432853,0.558101274797458,"NECTIN2/PELI1/NRAS/MYO1C/UBB",5
GO:0000280,"GO:0000280","nuclear division","4/120","305/12302",0.347056144001399,0.347056144001399,0.559490639554067,"BMP7/UBB/ING2/PRKAR1A",4
GO:0006417,"GO:0006417","regulation of translation","4/120","305/12302",0.347056144001399,0.347056144001399,0.559490639554067,"DDX3X/EIF1/LARP1/EIF2AK1",4
GO:0007249,"GO:0007249","I-kappaB kinase/NF-kappaB signaling","3/120","215/12302",0.34994849311942,0.34994849311942,0.560304438452709,"PELI1/NKIRAS1/UBB",3
GO:0002011,"GO:0002011","morphogenesis of an epithelial sheet","1/120","44/12302",0.350832703471831,0.350832703471831,0.560304438452709,"BMP7",1
GO:0006213,"GO:0006213","pyrimidine nucleoside metabolic process","1/120","44/12302",0.350832703471831,0.350832703471831,0.560304438452709,"DPYD",1
GO:0006749,"GO:0006749","glutathione metabolic process","1/120","44/12302",0.350832703471831,0.350832703471831,0.560304438452709,"GPX1",1
GO:0007040,"GO:0007040","lysosome organization","1/120","44/12302",0.350832703471831,0.350832703471831,0.560304438452709,"TPP1",1
GO:0010718,"GO:0010718","positive regulation of epithelial to mesenchymal transition","1/120","44/12302",0.350832703471831,0.350832703471831,0.560304438452709,"BMP7",1
GO:0045670,"GO:0045670","regulation of osteoclast differentiation","1/120","44/12302",0.350832703471831,0.350832703471831,0.560304438452709,"ESRRA",1
GO:0050854,"GO:0050854","regulation of antigen receptor-mediated signaling pathway","1/120","44/12302",0.350832703471831,0.350832703471831,0.560304438452709,"NECTIN2",1
GO:0061098,"GO:0061098","positive regulation of protein tyrosine kinase activity","1/120","44/12302",0.350832703471831,0.350832703471831,0.560304438452709,"GAS6",1
GO:0061512,"GO:0061512","protein localization to cilium","1/120","44/12302",0.350832703471831,0.350832703471831,0.560304438452709,"IFT122",1
GO:0075733,"GO:0075733","intracellular transport of virus","1/120","44/12302",0.350832703471831,0.350832703471831,0.560304438452709,"UBB",1
GO:0080171,"GO:0080171","lytic vacuole organization","1/120","44/12302",0.350832703471831,0.350832703471831,0.560304438452709,"TPP1",1
GO:1900408,"GO:1900408","negative regulation of cellular response to oxidative stress","1/120","44/12302",0.350832703471831,0.350832703471831,0.560304438452709,"GPX1",1
GO:0003006,"GO:0003006","developmental process involved in reproduction","6/120","494/12302",0.351390454577514,0.351390454577514,0.560571286694771,"NECTIN2/RARG/BMP7/UBB/ING2/CASP3",6
GO:0032970,"GO:0032970","regulation of actin filament-based process","4/120","307/12302",0.351503376082556,0.351503376082556,0.560571286694771,"PLEKHH2/MYO1C/PKP2/CARMIL1",4
GO:1901653,"GO:1901653","cellular response to peptide","4/120","308/12302",0.353727370075812,0.353727370075812,0.563714265689894,"MYO1C/NUCKS1/ESRRA/PRKAR1A",4
GO:0006261,"GO:0006261","DNA-dependent DNA replication","2/120","128/12302",0.355738182603252,0.355738182603252,0.564380917130973,"NUCKS1/WDHD1",2
GO:0060538,"GO:0060538","skeletal muscle organ development","2/120","128/12302",0.355738182603252,0.355738182603252,0.564380917130973,"GPX1/BCL9",2
GO:0001658,"GO:0001658","branching involved in ureteric bud morphogenesis","1/120","45/12302",0.35718774308542,0.35718774308542,0.564380917130973,"MYC",1
GO:0001910,"GO:0001910","regulation of leukocyte mediated cytotoxicity","1/120","45/12302",0.35718774308542,0.35718774308542,0.564380917130973,"NECTIN2",1
GO:0035384,"GO:0035384","thioester biosynthetic process","1/120","45/12302",0.35718774308542,0.35718774308542,0.564380917130973,"MPC1",1
GO:0045576,"GO:0045576","mast cell activation","1/120","45/12302",0.35718774308542,0.35718774308542,0.564380917130973,"NECTIN2",1
GO:0061005,"GO:0061005","cell differentiation involved in kidney development","1/120","45/12302",0.35718774308542,0.35718774308542,0.564380917130973,"PRKX",1
GO:0071385,"GO:0071385","cellular response to glucocorticoid stimulus","1/120","45/12302",0.35718774308542,0.35718774308542,0.564380917130973,"CASP9",1
GO:0071616,"GO:0071616","acyl-CoA biosynthetic process","1/120","45/12302",0.35718774308542,0.35718774308542,0.564380917130973,"MPC1",1
GO:0086002,"GO:0086002","cardiac muscle cell action potential involved in contraction","1/120","45/12302",0.35718774308542,0.35718774308542,0.564380917130973,"PKP2",1
GO:0086065,"GO:0086065","cell communication involved in cardiac conduction","1/120","45/12302",0.35718774308542,0.35718774308542,0.564380917130973,"PKP2",1
GO:1905207,"GO:1905207","regulation of cardiocyte differentiation","1/120","45/12302",0.35718774308542,0.35718774308542,0.564380917130973,"BMP7",1
GO:0071347,"GO:0071347","cellular response to interleukin-1","2/120","129/12302",0.359266592429003,0.359266592429003,0.566459551951201,"PELI1/UBB",2
GO:0071772,"GO:0071772","response to BMP","2/120","129/12302",0.359266592429003,0.359266592429003,0.566459551951201,"FAM83G/BMP7",2
GO:0071773,"GO:0071773","cellular response to BMP stimulus","2/120","129/12302",0.359266592429003,0.359266592429003,0.566459551951201,"FAM83G/BMP7",2
GO:0002444,"GO:0002444","myeloid leukocyte mediated immunity","5/120","405/12302",0.36124523581916,0.36124523581916,0.566683245723411,"SVIP/NRAS/DDX3X/UBR4/VCP",5
GO:0001936,"GO:0001936","regulation of endothelial cell proliferation","2/120","130/12302",0.362788097808465,0.362788097808465,0.566683245723411,"NRAS/EGR3",2
GO:0031570,"GO:0031570","DNA integrity checkpoint","2/120","130/12302",0.362788097808465,0.362788097808465,0.566683245723411,"CNOT4/TNKS1BP1",2
GO:0060485,"GO:0060485","mesenchyme development","3/120","220/12302",0.363290463873308,0.363290463873308,0.566683245723411,"MYC/FOXA2/BMP7",3
GO:0001895,"GO:0001895","retina homeostasis","1/120","46/12302",0.363481083285286,0.363481083285286,0.566683245723411,"BBS10",1
GO:0003229,"GO:0003229","ventricular cardiac muscle tissue development","1/120","46/12302",0.363481083285286,0.363481083285286,0.566683245723411,"PKP2",1
GO:0032720,"GO:0032720","negative regulation of tumor necrosis factor production","1/120","46/12302",0.363481083285286,0.363481083285286,0.566683245723411,"GAS6",1
GO:0043486,"GO:0043486","histone exchange","1/120","46/12302",0.363481083285286,0.363481083285286,0.566683245723411,"ZNHIT1",1
GO:0045071,"GO:0045071","negative regulation of viral genome replication","1/120","46/12302",0.363481083285286,0.363481083285286,0.566683245723411,"FAM111A",1
GO:0046782,"GO:0046782","regulation of viral transcription","1/120","46/12302",0.363481083285286,0.363481083285286,0.566683245723411,"NUCKS1",1
GO:0050710,"GO:0050710","negative regulation of cytokine secretion","1/120","46/12302",0.363481083285286,0.363481083285286,0.566683245723411,"GAS6",1
GO:0051898,"GO:0051898","negative regulation of protein kinase B signaling","1/120","46/12302",0.363481083285286,0.363481083285286,0.566683245723411,"DDIT3",1
GO:0060393,"GO:0060393","regulation of pathway-restricted SMAD protein phosphorylation","1/120","46/12302",0.363481083285286,0.363481083285286,0.566683245723411,"BMP7",1
GO:0098900,"GO:0098900","regulation of action potential","1/120","46/12302",0.363481083285286,0.363481083285286,0.566683245723411,"PKP2",1
GO:0120193,"GO:0120193","tight junction organization","1/120","46/12302",0.363481083285286,0.363481083285286,0.566683245723411,"MYO1C",1
GO:1902883,"GO:1902883","negative regulation of response to oxidative stress","1/120","46/12302",0.363481083285286,0.363481083285286,0.566683245723411,"GPX1",1
GO:0032868,"GO:0032868","response to insulin","3/120","221/12302",0.365954528389613,0.365954528389613,0.570140199288448,"MYO1C/NUCKS1/ESRRA",3
GO:0010921,"GO:0010921","regulation of phosphatase activity","2/120","131/12302",0.366302498224036,0.366302498224036,0.570283241622257,"NUAK1/PPP1R16A",2
GO:0045088,"GO:0045088","regulation of innate immune response","4/120","314/12302",0.367072051610489,0.367072051610489,0.570952112595041,"NECTIN2/PELI1/NRAS/UBB",4
GO:0005996,"GO:0005996","monosaccharide metabolic process","3/120","222/12302",0.368616886165626,0.368616886165626,0.570952112595041,"CREM/FOXA2/SLC45A3",3
GO:0007162,"GO:0007162","negative regulation of cell adhesion","3/120","222/12302",0.368616886165626,0.368616886165626,0.570952112595041,"PELI1/PRKAR1A/CASP3",3
GO:0001885,"GO:0001885","endothelial cell development","1/120","47/12302",0.369713318109516,0.369713318109516,0.570952112595041,"GPX1",1
GO:0002260,"GO:0002260","lymphocyte homeostasis","1/120","47/12302",0.369713318109516,0.369713318109516,0.570952112595041,"CASP3",1
GO:0043966,"GO:0043966","histone H3 acetylation","1/120","47/12302",0.369713318109516,0.369713318109516,0.570952112595041,"JADE1",1
GO:0046794,"GO:0046794","transport of virus","1/120","47/12302",0.369713318109516,0.369713318109516,0.570952112595041,"UBB",1
GO:0061178,"GO:0061178","regulation of insulin secretion involved in cellular response to glucose stimulus","1/120","47/12302",0.369713318109516,0.369713318109516,0.570952112595041,"FOXA2",1
GO:0070265,"GO:0070265","necrotic cell death","1/120","47/12302",0.369713318109516,0.369713318109516,0.570952112595041,"PELI1",1
GO:0070527,"GO:0070527","platelet aggregation","1/120","47/12302",0.369713318109516,0.369713318109516,0.570952112595041,"GAS6",1
GO:0070936,"GO:0070936","protein K48-linked ubiquitination","1/120","47/12302",0.369713318109516,0.369713318109516,0.570952112595041,"PELI1",1
GO:0055001,"GO:0055001","muscle cell development","2/120","132/12302",0.369809597656712,0.369809597656712,0.570952112595041,"GPX1/PRKAR1A",2
GO:0001819,"GO:0001819","positive regulation of cytokine production","4/120","317/12302",0.373741647949492,0.373741647949492,0.576335255169673,"PELI1/IL17RC/DDX3X/DDIT3",4
GO:0000186,"GO:0000186","activation of MAPKK activity","1/120","48/12302",0.375885035924845,0.375885035924845,0.576335255169673,"MAP3K6",1
GO:0002066,"GO:0002066","columnar/cuboidal epithelial cell development","1/120","48/12302",0.375885035924845,0.375885035924845,0.576335255169673,"RARG",1
GO:0008333,"GO:0008333","endosome to lysosome transport","1/120","48/12302",0.375885035924845,0.375885035924845,0.576335255169673,"VCP",1
GO:0045806,"GO:0045806","negative regulation of endocytosis","1/120","48/12302",0.375885035924845,0.375885035924845,0.576335255169673,"SNX3",1
GO:0050766,"GO:0050766","positive regulation of phagocytosis","1/120","48/12302",0.375885035924845,0.375885035924845,0.576335255169673,"GAS6",1
GO:0055081,"GO:0055081","anion homeostasis","1/120","48/12302",0.375885035924845,0.375885035924845,0.576335255169673,"TLCD1",1
GO:0060389,"GO:0060389","pathway-restricted SMAD protein phosphorylation","1/120","48/12302",0.375885035924845,0.375885035924845,0.576335255169673,"BMP7",1
GO:0071384,"GO:0071384","cellular response to corticosteroid stimulus","1/120","48/12302",0.375885035924845,0.375885035924845,0.576335255169673,"CASP9",1
GO:1903556,"GO:1903556","negative regulation of tumor necrosis factor superfamily cytokine production","1/120","48/12302",0.375885035924845,0.375885035924845,0.576335255169673,"GAS6",1
GO:0002218,"GO:0002218","activation of innate immune response","3/120","225/12302",0.376592620040895,0.376592620040895,0.576548665803086,"PELI1/NRAS/UBB",3
GO:0007093,"GO:0007093","mitotic cell cycle checkpoint","2/120","134/12302",0.376801131586911,0.376801131586911,0.576548665803086,"CNOT4/TNKS1BP1",2
GO:0030216,"GO:0030216","keratinocyte differentiation","2/120","134/12302",0.376801131586911,0.376801131586911,0.576548665803086,"PKP2/CASP3",2
GO:1901652,"GO:1901652","response to peptide","5/120","414/12302",0.378772009695932,0.378772009695932,0.5791662814538,"MYO1C/NUCKS1/BMP7/ESRRA/PRKAR1A",5
GO:0043588,"GO:0043588","skin development","3/120","226/12302",0.379247057898155,0.379247057898155,0.579494655531986,"PKP2/CASP3/LRP4",3
GO:0045619,"GO:0045619","regulation of lymphocyte differentiation","2/120","135/12302",0.380285195937282,0.380285195937282,0.579717485165512,"EGR3/GAS6",2
GO:0001836,"GO:0001836","release of cytochrome c from mitochondria","1/120","49/12302",0.381996819480338,0.381996819480338,0.579717485165512,"GPX1",1
GO:0002753,"GO:0002753","cytoplasmic pattern recognition receptor signaling pathway","1/120","49/12302",0.381996819480338,0.381996819480338,0.579717485165512,"UBB",1
GO:0009880,"GO:0009880","embryonic pattern specification","1/120","49/12302",0.381996819480338,0.381996819480338,0.579717485165512,"BMP7",1
GO:0010676,"GO:0010676","positive regulation of cellular carbohydrate metabolic process","1/120","49/12302",0.381996819480338,0.381996819480338,0.579717485165512,"SLC45A3",1
GO:0035914,"GO:0035914","skeletal muscle cell differentiation","1/120","49/12302",0.381996819480338,0.381996819480338,0.579717485165512,"BCL9",1
GO:0042982,"GO:0042982","amyloid precursor protein metabolic process","1/120","49/12302",0.381996819480338,0.381996819480338,0.579717485165512,"CASP3",1
GO:0048747,"GO:0048747","muscle fiber development","1/120","49/12302",0.381996819480338,0.381996819480338,0.579717485165512,"GPX1",1
GO:0060675,"GO:0060675","ureteric bud morphogenesis","1/120","49/12302",0.381996819480338,0.381996819480338,0.579717485165512,"MYC",1
GO:1902041,"GO:1902041","regulation of extrinsic apoptotic signaling pathway via death domain receptors","1/120","49/12302",0.381996819480338,0.381996819480338,0.579717485165512,"GPX1",1
GO:0007269,"GO:0007269","neurotransmitter secretion","2/120","136/12302",0.383761218879985,0.383761218879985,0.581998406662246,"PNKD/CTBP2",2
GO:1903827,"GO:1903827","regulation of cellular protein localization","5/120","417/12302",0.384615581137518,0.384615581137518,0.582897032786967,"SVIP/MYO1C/PCM1/GAS6/LRP4",5
GO:0099643,"GO:0099643","signal release from synapse","2/120","137/12302",0.387229025895445,0.387229025895445,0.585708585339247,"PNKD/CTBP2",2
GO:0031060,"GO:0031060","regulation of histone methylation","1/120","50/12302",0.388049245960577,0.388049245960577,0.585708585339247,"RIF1",1
GO:0032233,"GO:0032233","positive regulation of actin filament bundle assembly","1/120","50/12302",0.388049245960577,0.388049245960577,0.585708585339247,"CARMIL1",1
GO:0043297,"GO:0043297","apical junction assembly","1/120","50/12302",0.388049245960577,0.388049245960577,0.585708585339247,"MYO1C",1
GO:0060038,"GO:0060038","cardiac muscle cell proliferation","1/120","50/12302",0.388049245960577,0.388049245960577,0.585708585339247,"PRKAR1A",1
GO:0072171,"GO:0072171","mesonephric tubule morphogenesis","1/120","50/12302",0.388049245960577,0.388049245960577,0.585708585339247,"MYC",1
GO:0030335,"GO:0030335","positive regulation of cell migration","5/120","419/12302",0.388510550658536,0.388510550658536,0.586007569992015,"MYO1C/BMP7/GAS6/MAZ/CARMIL1",5
GO:0061138,"GO:0061138","morphogenesis of a branching epithelium","2/120","138/12302",0.390688446571196,0.390688446571196,0.588893606883141,"MYC/BMP7",2
GO:0051650,"GO:0051650","establishment of vesicle localization","3/120","231/12302",0.39248346810295,0.39248346810295,0.589228026711514,"MREG/MYO1C/CTBP2",3
GO:0001755,"GO:0001755","neural crest cell migration","1/120","51/12302",0.394042887038338,0.394042887038338,0.589228026711514,"BMP7",1
GO:0002532,"GO:0002532","production of molecular mediator involved in inflammatory response","1/120","51/12302",0.394042887038338,0.394042887038338,0.589228026711514,"IL17RC",1
GO:0006305,"GO:0006305","DNA alkylation","1/120","51/12302",0.394042887038338,0.394042887038338,0.589228026711514,"MYC",1
GO:0006306,"GO:0006306","DNA methylation","1/120","51/12302",0.394042887038338,0.394042887038338,0.589228026711514,"MYC",1
GO:0019730,"GO:0019730","antimicrobial humoral response","1/120","51/12302",0.394042887038338,0.394042887038338,0.589228026711514,"HMGN2",1
GO:0036498,"GO:0036498","IRE1-mediated unfolded protein response","1/120","51/12302",0.394042887038338,0.394042887038338,0.589228026711514,"TPP1",1
GO:0045453,"GO:0045453","bone resorption","1/120","51/12302",0.394042887038338,0.394042887038338,0.589228026711514,"TPP1",1
GO:0048645,"GO:0048645","animal organ formation","1/120","51/12302",0.394042887038338,0.394042887038338,0.589228026711514,"BMP7",1
GO:0070268,"GO:0070268","cornification","1/120","51/12302",0.394042887038338,0.394042887038338,0.589228026711514,"PKP2",1
GO:0050707,"GO:0050707","regulation of cytokine secretion","2/120","139/12302",0.394139314539554,0.394139314539554,0.589228026711514,"IL17RC/GAS6",2
GO:1903708,"GO:1903708","positive regulation of hemopoiesis","2/120","139/12302",0.394139314539554,0.394139314539554,0.589228026711514,"EGR3/GAS6",2
GO:0002253,"GO:0002253","activation of immune response","5/120","422/12302",0.394350955938604,0.394350955938604,0.589228026711514,"NECTIN2/PELI1/NRAS/MYO1C/UBB",5
GO:0044089,"GO:0044089","positive regulation of cellular component biogenesis","5/120","423/12302",0.396297027026679,0.396297027026679,0.591679750571888,"DDB2/MYO1C/BMP7/VCP/CARMIL1",5
GO:2001252,"GO:2001252","positive regulation of chromosome organization","2/120","140/12302",0.397581467416098,0.397581467416098,0.591679750571888,"RIF1/ING2",2
GO:0006687,"GO:0006687","glycosphingolipid metabolic process","1/120","52/12302",0.399978308926788,0.399978308926788,0.591679750571888,"CREM",1
GO:0007032,"GO:0007032","endosome organization","1/120","52/12302",0.399978308926788,0.399978308926788,0.591679750571888,"SNX3",1
GO:0021872,"GO:0021872","forebrain generation of neurons","1/120","52/12302",0.399978308926788,0.399978308926788,0.591679750571888,"UBB",1
GO:0030101,"GO:0030101","natural killer cell activation","1/120","52/12302",0.399978308926788,0.399978308926788,0.591679750571888,"GAS6",1
GO:0030239,"GO:0030239","myofibril assembly","1/120","52/12302",0.399978308926788,0.399978308926788,0.591679750571888,"PRKAR1A",1
GO:0032677,"GO:0032677","regulation of interleukin-8 production","1/120","52/12302",0.399978308926788,0.399978308926788,0.591679750571888,"DDIT3",1
GO:0032835,"GO:0032835","glomerulus development","1/120","52/12302",0.399978308926788,0.399978308926788,0.591679750571888,"BMP7",1
GO:0034121,"GO:0034121","regulation of toll-like receptor signaling pathway","1/120","52/12302",0.399978308926788,0.399978308926788,0.591679750571888,"PELI1",1
GO:0045815,"GO:0045815","positive regulation of gene expression, epigenetic","1/120","52/12302",0.399978308926788,0.399978308926788,0.591679750571888,"MYO1C",1
GO:0046824,"GO:0046824","positive regulation of nucleocytoplasmic transport","1/120","52/12302",0.399978308926788,0.399978308926788,0.591679750571888,"GAS6",1
GO:0055008,"GO:0055008","cardiac muscle tissue morphogenesis","1/120","52/12302",0.399978308926788,0.399978308926788,0.591679750571888,"PKP2",1
GO:0071242,"GO:0071242","cellular response to ammonium ion","1/120","52/12302",0.399978308926788,0.399978308926788,0.591679750571888,"CASP3",1
GO:0097755,"GO:0097755","positive regulation of blood vessel diameter","1/120","52/12302",0.399978308926788,0.399978308926788,0.591679750571888,"GPX1",1
GO:0006260,"GO:0006260","DNA replication","3/120","234/12302",0.400393037497962,0.400393037497962,0.591899961073733,"FAM111A/NUCKS1/WDHD1",3
GO:0003205,"GO:0003205","cardiac chamber development","2/120","141/12302",0.401014746738953,0.401014746738953,0.592032800050877,"PKP2/BMP7",2
GO:0030041,"GO:0030041","actin filament polymerization","2/120","141/12302",0.401014746738953,0.401014746738953,0.592032800050877,"MYO1C/CARMIL1",2
GO:0030177,"GO:0030177","positive regulation of Wnt signaling pathway","2/120","142/12302",0.404438997908855,0.404438997908855,0.594059028472918,"DDX3X/VCP",2
GO:0050731,"GO:0050731","positive regulation of peptidyl-tyrosine phosphorylation","2/120","142/12302",0.404438997908855,0.404438997908855,0.594059028472918,"GAS6/LRP4",2
GO:0070371,"GO:0070371","ERK1 and ERK2 cascade","3/120","236/12302",0.405650998082927,0.405650998082927,0.594059028472918,"MYC/GAS6/IQGAP3",3
GO:0006625,"GO:0006625","protein targeting to peroxisome","1/120","53/12302",0.405856072431179,0.405856072431179,0.594059028472918,"UBB",1
GO:0032272,"GO:0032272","negative regulation of protein polymerization","1/120","53/12302",0.405856072431179,0.405856072431179,0.594059028472918,"CARMIL1",1
GO:0032642,"GO:0032642","regulation of chemokine production","1/120","53/12302",0.405856072431179,0.405856072431179,0.594059028472918,"DDX3X",1
GO:0035773,"GO:0035773","insulin secretion involved in cellular response to glucose stimulus","1/120","53/12302",0.405856072431179,0.405856072431179,0.594059028472918,"FOXA2",1
GO:0046626,"GO:0046626","regulation of insulin receptor signaling pathway","1/120","53/12302",0.405856072431179,0.405856072431179,0.594059028472918,"NUCKS1",1
GO:0051937,"GO:0051937","catecholamine transport","1/120","53/12302",0.405856072431179,0.405856072431179,0.594059028472918,"RAB3B",1
GO:0061418,"GO:0061418","regulation of transcription from RNA polymerase II promoter in response to hypoxia","1/120","53/12302",0.405856072431179,0.405856072431179,0.594059028472918,"UBB",1
GO:0070059,"GO:0070059","intrinsic apoptotic signaling pathway in response to endoplasmic reticulum stress","1/120","53/12302",0.405856072431179,0.405856072431179,0.594059028472918,"DDIT3",1
GO:0072662,"GO:0072662","protein localization to peroxisome","1/120","53/12302",0.405856072431179,0.405856072431179,0.594059028472918,"UBB",1
GO:0072663,"GO:0072663","establishment of protein localization to peroxisome","1/120","53/12302",0.405856072431179,0.405856072431179,0.594059028472918,"UBB",1
GO:0008361,"GO:0008361","regulation of cell size","2/120","143/12302",0.407854070130002,0.407854070130002,0.596358235555106,"RARG/IQGAP3",2
GO:0043410,"GO:0043410","positive regulation of MAPK cascade","5/120","429/12302",0.407962606672769,0.407962606672769,0.596358235555106,"AVPI1/MAP3K6/GAS6/IQGAP3/UBB",5
GO:0042110,"GO:0042110","T cell activation","4/120","333/12302",0.409195530618134,0.409195530618134,0.59669427788866,"PELI1/EGR3/PRKAR1A/CASP3",4
GO:0000209,"GO:0000209","protein polyubiquitination","3/120","238/12302",0.410896006318328,0.410896006318328,0.59669427788866,"PELI1/DDB2/UBB",3
GO:0001659,"GO:0001659","temperature homeostasis","2/120","144/12302",0.411259816351674,0.411259816351674,0.59669427788866,"GPX1/DDIT3",2
GO:0042391,"GO:0042391","regulation of membrane potential","4/120","334/12302",0.411401149022912,0.411401149022912,0.59669427788866,"PKP2/KCNH3/UBB/VCP",4
GO:0001960,"GO:0001960","negative regulation of cytokine-mediated signaling pathway","1/120","54/12302",0.411676733000062,0.411676733000062,0.59669427788866,"GAS6",1
GO:0010324,"GO:0010324","membrane invagination","1/120","54/12302",0.411676733000062,0.411676733000062,0.59669427788866,"SNX3",1
GO:0043574,"GO:0043574","peroxisomal transport","1/120","54/12302",0.411676733000062,0.411676733000062,0.59669427788866,"UBB",1
GO:0045669,"GO:0045669","positive regulation of osteoblast differentiation","1/120","54/12302",0.411676733000062,0.411676733000062,0.59669427788866,"BMP7",1
GO:0051851,"GO:0051851","modification by host of symbiont morphology or physiology","1/120","54/12302",0.411676733000062,0.411676733000062,0.59669427788866,"NUCKS1",1
GO:0090502,"GO:0090502","RNA phosphodiester bond hydrolysis, endonucleolytic","1/120","54/12302",0.411676733000062,0.411676733000062,0.59669427788866,"ENDOV",1
GO:1903051,"GO:1903051","negative regulation of proteolysis involved in cellular protein catabolic process","1/120","54/12302",0.411676733000062,0.411676733000062,0.59669427788866,"SVIP",1
GO:1904705,"GO:1904705","regulation of vascular smooth muscle cell proliferation","1/120","54/12302",0.411676733000062,0.411676733000062,0.59669427788866,"GNAI3",1
GO:1990874,"GO:1990874","vascular smooth muscle cell proliferation","1/120","54/12302",0.411676733000062,0.411676733000062,0.59669427788866,"GNAI3",1
GO:0051648,"GO:0051648","vesicle localization","3/120","239/12302",0.413513422398305,0.413513422398305,0.5989664680837,"MREG/MYO1C/CTBP2",3
GO:0051783,"GO:0051783","regulation of nuclear division","2/120","145/12302",0.41465609321061,0.41465609321061,0.599841070510886,"BMP7/PRKAR1A",2
GO:2001235,"GO:2001235","positive regulation of apoptotic signaling pathway","2/120","145/12302",0.41465609321061,0.41465609321061,0.599841070510886,"DDIT3/UBB",2
GO:0006353,"GO:0006353","DNA-templated transcription, termination","1/120","55/12302",0.417440840776025,0.417440840776025,0.601612927881004,"MAZ",1
GO:0032602,"GO:0032602","chemokine production","1/120","55/12302",0.417440840776025,0.417440840776025,0.601612927881004,"DDX3X",1
GO:0033238,"GO:0033238","regulation of cellular amine metabolic process","1/120","55/12302",0.417440840776025,0.417440840776025,0.601612927881004,"PNKD",1
GO:0050805,"GO:0050805","negative regulation of synaptic transmission","1/120","55/12302",0.417440840776025,0.417440840776025,0.601612927881004,"PNKD",1
GO:0072078,"GO:0072078","nephron tubule morphogenesis","1/120","55/12302",0.417440840776025,0.417440840776025,0.601612927881004,"MYC",1
GO:0006364,"GO:0006364","rRNA processing","2/120","146/12302",0.418042760974145,0.418042760974145,0.601612927881004,"EXOSC9/MRM2",2
GO:0009166,"GO:0009166","nucleotide catabolic process","2/120","146/12302",0.418042760974145,0.418042760974145,0.601612927881004,"GPX1/VCP",2
GO:1903531,"GO:1903531","negative regulation of secretion by cell","2/120","146/12302",0.418042760974145,0.418042760974145,0.601612927881004,"PNKD/GAS6",2
GO:0090068,"GO:0090068","positive regulation of cell cycle process","3/120","241/12302",0.418737626789377,0.418737626789377,0.602223637059386,"CNOT4/DDX3X/TNKS1BP1",3
GO:1901654,"GO:1901654","response to ketone","2/120","147/12302",0.421419683484082,0.421419683484082,0.605039329921115,"CASP9/LARP1",2
GO:0007265,"GO:0007265","Ras protein signal transduction","4/120","339/12302",0.422404324684566,0.422404324684566,0.605039329921115,"ARHGEF3/RAB3B/NRAS/IQGAP3",4
GO:0009896,"GO:0009896","positive regulation of catabolic process","4/120","339/12302",0.422404324684566,0.422404324684566,0.605039329921115,"GNAI3/SVIP/LARP1/VCP",4
GO:0048285,"GO:0048285","organelle fission","4/120","339/12302",0.422404324684566,0.422404324684566,0.605039329921115,"BMP7/UBB/ING2/PRKAR1A",4
GO:0050708,"GO:0050708","regulation of protein secretion","4/120","339/12302",0.422404324684566,0.422404324684566,0.605039329921115,"IL17RC/PTPN23/FOXA2/GAS6",4
GO:0030317,"GO:0030317","flagellated sperm motility","1/120","56/12302",0.423148940645943,0.423148940645943,0.605039329921115,"ING2",1
GO:0086003,"GO:0086003","cardiac muscle cell contraction","1/120","56/12302",0.423148940645943,0.423148940645943,0.605039329921115,"PKP2",1
GO:0097722,"GO:0097722","sperm motility","1/120","56/12302",0.423148940645943,0.423148940645943,0.605039329921115,"ING2",1
GO:1900006,"GO:1900006","positive regulation of dendrite development","1/120","56/12302",0.423148940645943,0.423148940645943,0.605039329921115,"BMP7",1
GO:0043010,"GO:0043010","camera-type eye development","3/120","243/12302",0.423947071959021,0.423947071959021,0.605039329921115,"RARG/BMP7/IFT122",3
GO:0071804,"GO:0071804","cellular potassium ion transport","2/120","148/12302",0.424786728101304,0.424786728101304,0.605039329921115,"SLC9A8/KCNH3",2
GO:0071805,"GO:0071805","potassium ion transmembrane transport","2/120","148/12302",0.424786728101304,0.424786728101304,0.605039329921115,"SLC9A8/KCNH3",2
GO:0022411,"GO:0022411","cellular component disassembly","5/120","438/12302",0.425410200392943,0.425410200392943,0.605039329921115,"PLEKHH2/MYC/VCP/CASP3/CARMIL1",5
GO:2000147,"GO:2000147","positive regulation of cell motility","5/120","438/12302",0.425410200392943,0.425410200392943,0.605039329921115,"MYO1C/BMP7/GAS6/MAZ/CARMIL1",5
GO:0002429,"GO:0002429","immune response-activating cell surface receptor signaling pathway","3/120","244/12302",0.42654604328869,0.42654604328869,0.605039329921115,"NECTIN2/NRAS/MYO1C",3
GO:0030595,"GO:0030595","leukocyte chemotaxis","2/120","149/12302",0.428143765651108,0.428143765651108,0.605039329921115,"IL17RC/GAS6",2
GO:1905475,"GO:1905475","regulation of protein localization to membrane","2/120","149/12302",0.428143765651108,0.428143765651108,0.605039329921115,"MYO1C/LRP4",2
GO:0001510,"GO:0001510","RNA methylation","1/120","57/12302",0.428801572290764,0.428801572290764,0.605039329921115,"MRM2",1
GO:0007193,"GO:0007193","adenylate cyclase-inhibiting G protein-coupled receptor signaling pathway","1/120","57/12302",0.428801572290764,0.428801572290764,0.605039329921115,"GNAI3",1
GO:0031145,"GO:0031145","anaphase-promoting complex-dependent catabolic process","1/120","57/12302",0.428801572290764,0.428801572290764,0.605039329921115,"UBB",1
GO:0035050,"GO:0035050","embryonic heart tube development","1/120","57/12302",0.428801572290764,0.428801572290764,0.605039329921115,"IFT122",1
GO:0043407,"GO:0043407","negative regulation of MAP kinase activity","1/120","57/12302",0.428801572290764,0.428801572290764,0.605039329921115,"BMP7",1
GO:0043967,"GO:0043967","histone H4 acetylation","1/120","57/12302",0.428801572290764,0.428801572290764,0.605039329921115,"JADE1",1
GO:0044766,"GO:0044766","multi-organism transport","1/120","57/12302",0.428801572290764,0.428801572290764,0.605039329921115,"UBB",1
GO:0071300,"GO:0071300","cellular response to retinoic acid","1/120","57/12302",0.428801572290764,0.428801572290764,0.605039329921115,"RARG",1
GO:0072088,"GO:0072088","nephron epithelium morphogenesis","1/120","57/12302",0.428801572290764,0.428801572290764,0.605039329921115,"MYC",1
GO:1902579,"GO:1902579","multi-organism localization","1/120","57/12302",0.428801572290764,0.428801572290764,0.605039329921115,"UBB",1
GO:2000573,"GO:2000573","positive regulation of DNA biosynthetic process","1/120","57/12302",0.428801572290764,0.428801572290764,0.605039329921115,"MYC",1
GO:0048511,"GO:0048511","rhythmic process","3/120","245/12302",0.429141067223286,0.429141067223286,0.605039329921115,"CREM/EGR3/CASP3",3
GO:0002221,"GO:0002221","pattern recognition receptor signaling pathway","2/120","150/12302",0.431490670369258,0.431490670369258,0.605039329921115,"PELI1/UBB",2
GO:0099504,"GO:0099504","synaptic vesicle cycle","2/120","150/12302",0.431490670369258,0.431490670369258,0.605039329921115,"RAB3B/CTBP2",2
GO:2000377,"GO:2000377","regulation of reactive oxygen species metabolic process","2/120","150/12302",0.431490670369258,0.431490670369258,0.605039329921115,"GNAI3/BMP7",2
GO:0051052,"GO:0051052","regulation of DNA metabolic process","4/120","344/12302",0.433360585372764,0.433360585372764,0.605039329921115,"RIF1/MYC/NUCKS1/SHLD1",4
GO:0016050,"GO:0016050","vesicle organization","3/120","247/12302",0.434318939983599,0.434318939983599,0.605039329921115,"NECTIN2/GNAI3/SNX3",3
GO:0003208,"GO:0003208","cardiac ventricle morphogenesis","1/120","58/12302",0.434399270234832,0.434399270234832,0.605039329921115,"PKP2",1
GO:0006487,"GO:0006487","protein N-linked glycosylation","1/120","58/12302",0.434399270234832,0.434399270234832,0.605039329921115,"VCP",1
GO:0015914,"GO:0015914","phospholipid transport","1/120","58/12302",0.434399270234832,0.434399270234832,0.605039329921115,"MTTP",1
GO:0030279,"GO:0030279","negative regulation of ossification","1/120","58/12302",0.434399270234832,0.434399270234832,0.605039329921115,"LRP4",1
GO:0030500,"GO:0030500","regulation of bone mineralization","1/120","58/12302",0.434399270234832,0.434399270234832,0.605039329921115,"BMP7",1
GO:0031341,"GO:0031341","regulation of cell killing","1/120","58/12302",0.434399270234832,0.434399270234832,0.605039329921115,"NECTIN2",1
GO:0032482,"GO:0032482","Rab protein signal transduction","1/120","58/12302",0.434399270234832,0.434399270234832,0.605039329921115,"RAB3B",1
GO:0032637,"GO:0032637","interleukin-8 production","1/120","58/12302",0.434399270234832,0.434399270234832,0.605039329921115,"DDIT3",1
GO:0033077,"GO:0033077","T cell differentiation in thymus","1/120","58/12302",0.434399270234832,0.434399270234832,0.605039329921115,"EGR3",1
GO:0033866,"GO:0033866","nucleoside bisphosphate biosynthetic process","1/120","58/12302",0.434399270234832,0.434399270234832,0.605039329921115,"MPC1",1
GO:0034030,"GO:0034030","ribonucleoside bisphosphate biosynthetic process","1/120","58/12302",0.434399270234832,0.434399270234832,0.605039329921115,"MPC1",1
GO:0034033,"GO:0034033","purine nucleoside bisphosphate biosynthetic process","1/120","58/12302",0.434399270234832,0.434399270234832,0.605039329921115,"MPC1",1
GO:0045685,"GO:0045685","regulation of glial cell differentiation","1/120","58/12302",0.434399270234832,0.434399270234832,0.605039329921115,"SLC45A3",1
GO:0046128,"GO:0046128","purine ribonucleoside metabolic process","1/120","58/12302",0.434399270234832,0.434399270234832,0.605039329921115,"GNAI3",1
GO:0050771,"GO:0050771","negative regulation of axonogenesis","1/120","58/12302",0.434399270234832,0.434399270234832,0.605039329921115,"LRP4",1
GO:0001763,"GO:0001763","morphogenesis of a branching structure","2/120","151/12302",0.434827319848744,0.434827319848744,0.605039329921115,"MYC/BMP7",2
GO:0015893,"GO:0015893","drug transport","2/120","151/12302",0.434827319848744,0.434827319848744,0.605039329921115,"MYC/RAB3B",2
GO:0043409,"GO:0043409","negative regulation of MAPK cascade","2/120","151/12302",0.434827319848744,0.434827319848744,0.605039329921115,"MYC/BMP7",2
GO:0048232,"GO:0048232","male gamete generation","4/120","345/12302",0.435545577489516,0.435545577489516,0.605660209993969,"NECTIN2/CREM/UBB/ING2",4
GO:0070555,"GO:0070555","response to interleukin-1","2/120","152/12302",0.438153594987242,0.438153594987242,0.608526679185749,"PELI1/UBB",2
GO:1901292,"GO:1901292","nucleoside phosphate catabolic process","2/120","152/12302",0.438153594987242,0.438153594987242,0.608526679185749,"GPX1/VCP",2
GO:1990778,"GO:1990778","protein localization to cell periphery","3/120","249/12302",0.439480035560419,0.439480035560419,0.609111365957946,"RAB3B/PKP2/GAS6",3
GO:0019674,"GO:0019674","NAD metabolic process","1/120","59/12302",0.439942563894732,0.439942563894732,0.609111365957946,"VCP",1
GO:0021536,"GO:0021536","diencephalon development","1/120","59/12302",0.439942563894732,0.439942563894732,0.609111365957946,"UBB",1
GO:0060395,"GO:0060395","SMAD protein signal transduction","1/120","59/12302",0.439942563894732,0.439942563894732,0.609111365957946,"BMP7",1
GO:0061333,"GO:0061333","renal tubule morphogenesis","1/120","59/12302",0.439942563894732,0.439942563894732,0.609111365957946,"MYC",1
GO:0006575,"GO:0006575","cellular modified amino acid metabolic process","2/120","153/12302",0.441469379935268,0.441469379935268,0.610845401565597,"GPX1/SLC22A4",2
GO:0007219,"GO:0007219","Notch signaling pathway","2/120","154/12302",0.444774562045007,0.444774562045007,0.611011857627247,"MYC/BMP7",2
GO:0019362,"GO:0019362","pyridine nucleotide metabolic process","2/120","154/12302",0.444774562045007,0.444774562045007,0.611011857627247,"MPC1/VCP",2
GO:0046496,"GO:0046496","nicotinamide nucleotide metabolic process","2/120","154/12302",0.444774562045007,0.444774562045007,0.611011857627247,"MPC1/VCP",2
GO:0001909,"GO:0001909","leukocyte mediated cytotoxicity","1/120","60/12302",0.445431977627693,0.445431977627693,0.611011857627247,"NECTIN2",1
GO:0007004,"GO:0007004","telomere maintenance via telomerase","1/120","60/12302",0.445431977627693,0.445431977627693,0.611011857627247,"TNKS1BP1",1
GO:0008344,"GO:0008344","adult locomotory behavior","1/120","60/12302",0.445431977627693,0.445431977627693,0.611011857627247,"FOXA2",1
GO:0010660,"GO:0010660","regulation of muscle cell apoptotic process","1/120","60/12302",0.445431977627693,0.445431977627693,0.611011857627247,"BMP7",1
GO:0031100,"GO:0031100","animal organ regeneration","1/120","60/12302",0.445431977627693,0.445431977627693,0.611011857627247,"GAS6",1
GO:0032481,"GO:0032481","positive regulation of type I interferon production","1/120","60/12302",0.445431977627693,0.445431977627693,0.611011857627247,"DDX3X",1
GO:0042698,"GO:0042698","ovulation cycle","1/120","60/12302",0.445431977627693,0.445431977627693,0.611011857627247,"CASP3",1
GO:0060761,"GO:0060761","negative regulation of response to cytokine stimulus","1/120","60/12302",0.445431977627693,0.445431977627693,0.611011857627247,"GAS6",1
GO:0061035,"GO:0061035","regulation of cartilage development","1/120","60/12302",0.445431977627693,0.445431977627693,0.611011857627247,"RARG",1
GO:0086001,"GO:0086001","cardiac muscle cell action potential","1/120","60/12302",0.445431977627693,0.445431977627693,0.611011857627247,"PKP2",1
GO:1903391,"GO:1903391","regulation of adherens junction organization","1/120","60/12302",0.445431977627693,0.445431977627693,0.611011857627247,"PTPN23",1
GO:0051272,"GO:0051272","positive regulation of cellular component movement","5/120","449/12302",0.446611774874372,0.446611774874372,0.6122529840934,"MYO1C/BMP7/GAS6/MAZ/CARMIL1",5
GO:0006473,"GO:0006473","protein acetylation","2/120","155/12302",0.448069031819823,0.448069031819823,0.6134951785453,"JADE1/NAA20",2
GO:0035265,"GO:0035265","organ growth","2/120","155/12302",0.448069031819823,0.448069031819823,0.6134951785453,"RARG/PRKAR1A",2
GO:0003073,"GO:0003073","regulation of systemic arterial blood pressure","1/120","61/12302",0.450868030779521,0.450868030779521,0.614681332451533,"GAS6",1
GO:0007422,"GO:0007422","peripheral nervous system development","1/120","61/12302",0.450868030779521,0.450868030779521,0.614681332451533,"EGR3",1
GO:0030512,"GO:0030512","negative regulation of transforming growth factor beta receptor signaling pathway","1/120","61/12302",0.450868030779521,0.450868030779521,0.614681332451533,"UBB",1
GO:0042278,"GO:0042278","purine nucleoside metabolic process","1/120","61/12302",0.450868030779521,0.450868030779521,0.614681332451533,"GNAI3",1
GO:0051453,"GO:0051453","regulation of intracellular pH","1/120","61/12302",0.450868030779521,0.450868030779521,0.614681332451533,"SLC9A8",1
GO:0060415,"GO:0060415","muscle tissue morphogenesis","1/120","61/12302",0.450868030779521,0.450868030779521,0.614681332451533,"PKP2",1
GO:1903201,"GO:1903201","regulation of oxidative stress-induced cell death","1/120","61/12302",0.450868030779521,0.450868030779521,0.614681332451533,"GPX1",1
GO:0007179,"GO:0007179","transforming growth factor beta receptor signaling pathway","2/120","157/12302",0.45462541183576,0.45462541183576,0.619365447884069,"UBB/ING2",2
GO:0007507,"GO:0007507","heart development","5/120","454/12302",0.456190531746639,0.456190531746639,0.619365447884069,"PKP2/BMP7/IFT122/PRKAR1A/CASP3",5
GO:0006278,"GO:0006278","RNA-dependent DNA biosynthetic process","1/120","62/12302",0.456251237732094,0.456251237732094,0.619365447884069,"TNKS1BP1",1
GO:0008652,"GO:0008652","cellular amino acid biosynthetic process","1/120","62/12302",0.456251237732094,0.456251237732094,0.619365447884069,"DPYD",1
GO:0014855,"GO:0014855","striated muscle cell proliferation","1/120","62/12302",0.456251237732094,0.456251237732094,0.619365447884069,"PRKAR1A",1
GO:0030193,"GO:0030193","regulation of blood coagulation","1/120","62/12302",0.456251237732094,0.456251237732094,0.619365447884069,"FOXA2",1
GO:1904035,"GO:1904035","regulation of epithelial cell apoptotic process","1/120","62/12302",0.456251237732094,0.456251237732094,0.619365447884069,"GAS6",1
GO:0002250,"GO:0002250","adaptive immune response","3/120","256/12302",0.457402712103715,0.457402712103715,0.620073796519465,"NECTIN2/RIF1/SHLD1",3
GO:0031032,"GO:0031032","actomyosin structure organization","2/120","158/12302",0.457887118394374,0.457887118394374,0.620073796519465,"PRKAR1A/CARMIL1",2
GO:0035303,"GO:0035303","regulation of dephosphorylation","2/120","158/12302",0.457887118394374,0.457887118394374,0.620073796519465,"NUAK1/PPP1R16A",2
GO:0072524,"GO:0072524","pyridine-containing compound metabolic process","2/120","158/12302",0.457887118394374,0.457887118394374,0.620073796519465,"MPC1/VCP",2
GO:0040017,"GO:0040017","positive regulation of locomotion","5/120","456/12302",0.460010201920581,0.460010201920581,0.620922981914525,"MYO1C/BMP7/GAS6/MAZ/CARMIL1",5
GO:0008589,"GO:0008589","regulation of smoothened signaling pathway","1/120","63/12302",0.461582107950407,0.461582107950407,0.620922981914525,"IFT122",1
GO:0009060,"GO:0009060","aerobic respiration","1/120","63/12302",0.461582107950407,0.461582107950407,0.620922981914525,"VCP",1
GO:0032649,"GO:0032649","regulation of interferon-gamma production","1/120","63/12302",0.461582107950407,0.461582107950407,0.620922981914525,"GAS6",1
GO:0032755,"GO:0032755","positive regulation of interleukin-6 production","1/120","63/12302",0.461582107950407,0.461582107950407,0.620922981914525,"IL17RC",1
GO:0055117,"GO:0055117","regulation of cardiac muscle contraction","1/120","63/12302",0.461582107950407,0.461582107950407,0.620922981914525,"PKP2",1
GO:0060350,"GO:0060350","endochondral bone morphogenesis","1/120","63/12302",0.461582107950407,0.461582107950407,0.620922981914525,"RARG",1
GO:0097194,"GO:0097194","execution phase of apoptosis","1/120","63/12302",0.461582107950407,0.461582107950407,0.620922981914525,"CASP3",1
GO:1900046,"GO:1900046","regulation of hemostasis","1/120","63/12302",0.461582107950407,0.461582107950407,0.620922981914525,"FOXA2",1
GO:1903845,"GO:1903845","negative regulation of cellular response to transforming growth factor beta stimulus","1/120","63/12302",0.461582107950407,0.461582107950407,0.620922981914525,"UBB",1
GO:2000106,"GO:2000106","regulation of leukocyte apoptotic process","1/120","63/12302",0.461582107950407,0.461582107950407,0.620922981914525,"GAS6",1
GO:0002791,"GO:0002791","regulation of peptide secretion","4/120","358/12302",0.463729279202253,0.463729279202253,0.621638959866337,"IL17RC/PTPN23/FOXA2/GAS6",4
GO:0023061,"GO:0023061","signal release","4/120","358/12302",0.463729279202253,0.463729279202253,0.621638959866337,"PTPN23/FOXA2/PNKD/CTBP2",4
GO:0006888,"GO:0006888","ER to Golgi vesicle-mediated transport","2/120","160/12302",0.464377077647575,0.464377077647575,0.621638959866337,"GAS6/VCP",2
GO:0051048,"GO:0051048","negative regulation of secretion","2/120","160/12302",0.464377077647575,0.464377077647575,0.621638959866337,"PNKD/GAS6",2
GO:0002690,"GO:0002690","positive regulation of leukocyte chemotaxis","1/120","64/12302",0.466861146029168,0.466861146029168,0.621638959866337,"GAS6",1
GO:0007031,"GO:0007031","peroxisome organization","1/120","64/12302",0.466861146029168,0.466861146029168,0.621638959866337,"UBB",1
GO:0010657,"GO:0010657","muscle cell apoptotic process","1/120","64/12302",0.466861146029168,0.466861146029168,0.621638959866337,"BMP7",1
GO:0015844,"GO:0015844","monoamine transport","1/120","64/12302",0.466861146029168,0.466861146029168,0.621638959866337,"RAB3B",1
GO:0021766,"GO:0021766","hippocampus development","1/120","64/12302",0.466861146029168,0.466861146029168,0.621638959866337,"CASP3",1
GO:0030641,"GO:0030641","regulation of cellular pH","1/120","64/12302",0.466861146029168,0.466861146029168,0.621638959866337,"SLC9A8",1
GO:0031424,"GO:0031424","keratinization","1/120","64/12302",0.466861146029168,0.466861146029168,0.621638959866337,"PKP2",1
GO:0032436,"GO:0032436","positive regulation of proteasomal ubiquitin-dependent protein catabolic process","1/120","64/12302",0.466861146029168,0.466861146029168,0.621638959866337,"VCP",1
GO:0043507,"GO:0043507","positive regulation of JUN kinase activity","1/120","64/12302",0.466861146029168,0.466861146029168,0.621638959866337,"MAP3K6",1
GO:0045445,"GO:0045445","myoblast differentiation","1/120","64/12302",0.466861146029168,0.466861146029168,0.621638959866337,"DDIT3",1
GO:0045652,"GO:0045652","regulation of megakaryocyte differentiation","1/120","64/12302",0.466861146029168,0.466861146029168,0.621638959866337,"CNOT4",1
GO:0097306,"GO:0097306","cellular response to alcohol","1/120","64/12302",0.466861146029168,0.466861146029168,0.621638959866337,"LARP1",1
GO:1903533,"GO:1903533","regulation of protein targeting","1/120","64/12302",0.466861146029168,0.466861146029168,0.621638959866337,"MYO1C",1
GO:0097164,"GO:0097164","ammonium ion metabolic process","2/120","161/12302",0.467605144254008,0.467605144254008,0.622257451220454,"PNKD/SLC22A4",2
GO:0002042,"GO:0002042","cell migration involved in sprouting angiogenesis","1/120","65/12302",0.472088851738965,0.472088851738965,0.625234303784033,"EGR3",1
GO:0006081,"GO:0006081","cellular aldehyde metabolic process","1/120","65/12302",0.472088851738965,0.472088851738965,0.625234303784033,"PNKD",1
GO:0042632,"GO:0042632","cholesterol homeostasis","1/120","65/12302",0.472088851738965,0.472088851738965,0.625234303784033,"MTTP",1
GO:0045638,"GO:0045638","negative regulation of myeloid cell differentiation","1/120","65/12302",0.472088851738965,0.472088851738965,0.625234303784033,"MYC",1
GO:0048644,"GO:0048644","muscle organ morphogenesis","1/120","65/12302",0.472088851738965,0.472088851738965,0.625234303784033,"PKP2",1
GO:0050818,"GO:0050818","regulation of coagulation","1/120","65/12302",0.472088851738965,0.472088851738965,0.625234303784033,"FOXA2",1
GO:0072676,"GO:0072676","lymphocyte migration","1/120","65/12302",0.472088851738965,0.472088851738965,0.625234303784033,"GAS6",1
GO:1903363,"GO:1903363","negative regulation of cellular protein catabolic process","1/120","65/12302",0.472088851738965,0.472088851738965,0.625234303784033,"SVIP",1
GO:0001894,"GO:0001894","tissue homeostasis","2/120","163/12302",0.474027007395473,0.474027007395473,0.626682785749109,"BBS10/TPP1",2
GO:0031396,"GO:0031396","regulation of protein ubiquitination","2/120","163/12302",0.474027007395473,0.474027007395473,0.626682785749109,"PELI1/UBB",2
GO:0050663,"GO:0050663","cytokine secretion","2/120","163/12302",0.474027007395473,0.474027007395473,0.626682785749109,"IL17RC/GAS6",2
GO:0050807,"GO:0050807","regulation of synapse organization","2/120","164/12302",0.477220634603206,0.477220634603206,0.628352577392559,"VCP/LRP4",2
GO:0002456,"GO:0002456","T cell mediated immunity","1/120","66/12302",0.477265720071998,0.477265720071998,0.628352577392559,"NECTIN2",1
GO:0032204,"GO:0032204","regulation of telomere maintenance","1/120","66/12302",0.477265720071998,0.477265720071998,0.628352577392559,"MYC",1
GO:0045582,"GO:0045582","positive regulation of T cell differentiation","1/120","66/12302",0.477265720071998,0.477265720071998,0.628352577392559,"EGR3",1
GO:0046889,"GO:0046889","positive regulation of lipid biosynthetic process","1/120","66/12302",0.477265720071998,0.477265720071998,0.628352577392559,"SLC45A3",1
GO:0051492,"GO:0051492","regulation of stress fiber assembly","1/120","66/12302",0.477265720071998,0.477265720071998,0.628352577392559,"CARMIL1",1
GO:0055092,"GO:0055092","sterol homeostasis","1/120","66/12302",0.477265720071998,0.477265720071998,0.628352577392559,"MTTP",1
GO:0016311,"GO:0016311","dephosphorylation","4/120","365/12302",0.478709923603017,0.478709923603017,0.629881478425022,"NUAK1/CTDSP1/PTPN23/PPP1R16A",4
GO:0071496,"GO:0071496","cellular response to external stimulus","3/120","265/12302",0.480092032886059,0.480092032886059,0.631326918614739,"TBL2/FOXA2/GAS6",3
GO:0002433,"GO:0002433","immune response-regulating cell surface receptor signaling pathway involved in phagocytosis","1/120","67/12302",0.482392241287376,0.482392241287376,0.631622613607532,"MYO1C",1
GO:0003151,"GO:0003151","outflow tract morphogenesis","1/120","67/12302",0.482392241287376,0.482392241287376,0.631622613607532,"BMP7",1
GO:0032652,"GO:0032652","regulation of interleukin-1 production","1/120","67/12302",0.482392241287376,0.482392241287376,0.631622613607532,"GAS6",1
GO:0038096,"GO:0038096","Fc-gamma receptor signaling pathway involved in phagocytosis","1/120","67/12302",0.482392241287376,0.482392241287376,0.631622613607532,"MYO1C",1
GO:0044728,"GO:0044728","DNA methylation or demethylation","1/120","67/12302",0.482392241287376,0.482392241287376,0.631622613607532,"MYC",1
GO:0045913,"GO:0045913","positive regulation of carbohydrate metabolic process","1/120","67/12302",0.482392241287376,0.482392241287376,0.631622613607532,"SLC45A3",1
GO:0060411,"GO:0060411","cardiac septum morphogenesis","1/120","67/12302",0.482392241287376,0.482392241287376,0.631622613607532,"BMP7",1
GO:0008544,"GO:0008544","epidermis development","3/120","266/12302",0.482586554354181,0.482586554354181,0.631622613607532,"PKP2/CASP3/LRP4",3
GO:0006109,"GO:0006109","regulation of carbohydrate metabolic process","2/120","166/12302",0.483572877153541,0.483572877153541,0.63217024766186,"FOXA2/SLC45A3",2
GO:0060348,"GO:0060348","bone development","2/120","166/12302",0.483572877153541,0.483572877153541,0.63217024766186,"SP5/RARG",2
GO:0002768,"GO:0002768","immune response-regulating cell surface receptor signaling pathway","3/120","267/12302",0.485075541171094,0.485075541171094,0.633762521359566,"NECTIN2/NRAS/MYO1C",3
GO:0002064,"GO:0002064","epithelial cell development","2/120","167/12302",0.48673133912907,0.48673133912907,0.634654801798659,"GPX1/RARG",2
GO:0001776,"GO:0001776","leukocyte homeostasis","1/120","68/12302",0.487468900955991,0.487468900955991,0.634654801798659,"CASP3",1
GO:0006890,"GO:0006890","retrograde vesicle-mediated transport, Golgi to ER","1/120","68/12302",0.487468900955991,0.487468900955991,0.634654801798659,"NBAS",1
GO:0030316,"GO:0030316","osteoclast differentiation","1/120","68/12302",0.487468900955991,0.487468900955991,0.634654801798659,"ESRRA",1
GO:0043044,"GO:0043044","ATP-dependent chromatin remodeling","1/120","68/12302",0.487468900955991,0.487468900955991,0.634654801798659,"ZNHIT1",1
GO:1901992,"GO:1901992","positive regulation of mitotic cell cycle phase transition","1/120","68/12302",0.487468900955991,0.487468900955991,0.634654801798659,"DDX3X",1
GO:0007623,"GO:0007623","circadian rhythm","2/120","168/12302",0.48987793027611,0.48987793027611,0.636362171677628,"CREM/EGR3",2
GO:0032271,"GO:0032271","regulation of protein polymerization","2/120","168/12302",0.48987793027611,0.48987793027611,0.636362171677628,"MYO1C/CARMIL1",2
GO:0032956,"GO:0032956","regulation of actin cytoskeleton organization","3/120","269/12302",0.490036671004782,0.490036671004782,0.636362171677628,"PLEKHH2/MYO1C/CARMIL1",3
GO:0031400,"GO:0031400","negative regulation of protein modification process","5/120","472/12302",0.49028393338602,0.49028393338602,0.636362171677628,"MYC/CTDSP1/BMP7/PRKAR1A/CASP3",5
GO:0051051,"GO:0051051","negative regulation of transport","4/120","371/12302",0.491425570389326,0.491425570389326,0.636362171677628,"SVIP/PNKD/SNX3/GAS6",4
GO:0007589,"GO:0007589","body fluid secretion","1/120","69/12302",0.492496180004976,0.492496180004976,0.636362171677628,"SLC22A4",1
GO:0010833,"GO:0010833","telomere maintenance via telomere lengthening","1/120","69/12302",0.492496180004976,0.492496180004976,0.636362171677628,"TNKS1BP1",1
GO:0021954,"GO:0021954","central nervous system neuron development","1/120","69/12302",0.492496180004976,0.492496180004976,0.636362171677628,"UBB",1
GO:0031016,"GO:0031016","pancreas development","1/120","69/12302",0.492496180004976,0.492496180004976,0.636362171677628,"FOXA2",1
GO:0031146,"GO:0031146","SCF-dependent proteasomal ubiquitin-dependent protein catabolic process","1/120","69/12302",0.492496180004976,0.492496180004976,0.636362171677628,"FBXO33",1
GO:0032609,"GO:0032609","interferon-gamma production","1/120","69/12302",0.492496180004976,0.492496180004976,0.636362171677628,"GAS6",1
GO:0038094,"GO:0038094","Fc-gamma receptor signaling pathway","1/120","69/12302",0.492496180004976,0.492496180004976,0.636362171677628,"MYO1C",1
GO:0061097,"GO:0061097","regulation of protein tyrosine kinase activity","1/120","69/12302",0.492496180004976,0.492496180004976,0.636362171677628,"GAS6",1
GO:0006813,"GO:0006813","potassium ion transport","2/120","169/12302",0.493012580272033,0.493012580272033,0.636659914077023,"SLC9A8/KCNH3",2
GO:0006733,"GO:0006733","oxidoreduction coenzyme metabolic process","2/120","170/12302",0.496135221263676,0.496135221263676,0.639579430696781,"MPC1/VCP",2
GO:0007281,"GO:0007281","germ cell development","2/120","170/12302",0.496135221263676,0.496135221263676,0.639579430696781,"NECTIN2/ING2",2
GO:0050803,"GO:0050803","regulation of synapse structure or activity","2/120","170/12302",0.496135221263676,0.496135221263676,0.639579430696781,"VCP/LRP4",2
GO:0001942,"GO:0001942","hair follicle development","1/120","70/12302",0.497474554761733,0.497474554761733,0.640193905275975,"LRP4",1
GO:0016073,"GO:0016073","snRNA metabolic process","1/120","70/12302",0.497474554761733,0.497474554761733,0.640193905275975,"EXOSC9",1
GO:0097006,"GO:0097006","regulation of plasma lipoprotein particle levels","1/120","70/12302",0.497474554761733,0.497474554761733,0.640193905275975,"MTTP",1
GO:0002697,"GO:0002697","regulation of immune effector process","3/120","273/12302",0.499889931497994,0.499889931497994,0.642930587806414,"NECTIN2/RIF1/SHLD1",3
GO:0006885,"GO:0006885","regulation of pH","1/120","71/12302",0.502404496997556,0.502404496997556,0.643932679544182,"SLC9A8",1
GO:0043506,"GO:0043506","regulation of JUN kinase activity","1/120","71/12302",0.502404496997556,0.502404496997556,0.643932679544182,"MAP3K6",1
GO:0048704,"GO:0048704","embryonic skeletal system morphogenesis","1/120","71/12302",0.502404496997556,0.502404496997556,0.643932679544182,"BMP7",1
GO:0048709,"GO:0048709","oligodendrocyte differentiation","1/120","71/12302",0.502404496997556,0.502404496997556,0.643932679544182,"SLC45A3",1
GO:0072080,"GO:0072080","nephron tubule development","1/120","71/12302",0.502404496997556,0.502404496997556,0.643932679544182,"MYC",1
GO:0098773,"GO:0098773","skin epidermis development","1/120","71/12302",0.502404496997556,0.502404496997556,0.643932679544182,"LRP4",1
GO:0001892,"GO:0001892","embryonic placenta development","1/120","72/12302",0.507286473970845,0.507286473970845,0.646468166449756,"BMP7",1
GO:0002220,"GO:0002220","innate immune response activating cell surface receptor signaling pathway","1/120","72/12302",0.507286473970845,0.507286473970845,0.646468166449756,"NRAS",1
GO:0002223,"GO:0002223","stimulatory C-type lectin receptor signaling pathway","1/120","72/12302",0.507286473970845,0.507286473970845,0.646468166449756,"NRAS",1
GO:0002431,"GO:0002431","Fc receptor mediated stimulatory signaling pathway","1/120","72/12302",0.507286473970845,0.507286473970845,0.646468166449756,"MYO1C",1
GO:0006112,"GO:0006112","energy reserve metabolic process","1/120","72/12302",0.507286473970845,0.507286473970845,0.646468166449756,"MYC",1
GO:0014032,"GO:0014032","neural crest cell development","1/120","72/12302",0.507286473970845,0.507286473970845,0.646468166449756,"BMP7",1
GO:0022404,"GO:0022404","molting cycle process","1/120","72/12302",0.507286473970845,0.507286473970845,0.646468166449756,"LRP4",1
GO:0022405,"GO:0022405","hair cycle process","1/120","72/12302",0.507286473970845,0.507286473970845,0.646468166449756,"LRP4",1
GO:0051952,"GO:0051952","regulation of amine transport","1/120","72/12302",0.507286473970845,0.507286473970845,0.646468166449756,"RAB3B",1
GO:1990542,"GO:1990542","mitochondrial transmembrane transport","1/120","72/12302",0.507286473970845,0.507286473970845,0.646468166449756,"MPC1",1
GO:0016072,"GO:0016072","rRNA metabolic process","2/120","174/12302",0.508504422289521,0.508504422289521,0.647279259211181,"EXOSC9/MRM2",2
GO:0043624,"GO:0043624","cellular protein complex disassembly","2/120","174/12302",0.508504422289521,0.508504422289521,0.647279259211181,"PLEKHH2/CARMIL1",2
GO:0043687,"GO:0043687","post-translational protein modification","3/120","277/12302",0.509648241403606,0.509648241403606,0.648364529665339,"DDB2/COPS7A/GAS6",3
GO:0002028,"GO:0002028","regulation of sodium ion transport","1/120","73/12302",0.512120948469905,0.512120948469905,0.649654104671674,"PKP2",1
GO:0006906,"GO:0006906","vesicle fusion","1/120","73/12302",0.512120948469905,0.512120948469905,0.649654104671674,"GNAI3",1
GO:0006942,"GO:0006942","regulation of striated muscle contraction","1/120","73/12302",0.512120948469905,0.512120948469905,0.649654104671674,"PKP2",1
GO:0061326,"GO:0061326","renal tubule development","1/120","73/12302",0.512120948469905,0.512120948469905,0.649654104671674,"MYC",1
GO:2001023,"GO:2001023","regulation of response to drug","1/120","73/12302",0.512120948469905,0.512120948469905,0.649654104671674,"RAB3B",1
GO:0010038,"GO:0010038","response to metal ion","3/120","279/12302",0.514490739886665,0.514490739886665,0.651704405317272,"CYBRD1/CASP9/CASP3",3
GO:0031589,"GO:0031589","cell-substrate adhesion","3/120","279/12302",0.514490739886665,0.514490739886665,0.651704405317272,"PRKX/GAS6/CARMIL1",3
GO:0051495,"GO:0051495","positive regulation of cytoskeleton organization","2/120","176/12302",0.514615379347695,0.514615379347695,0.651704405317272,"MYO1C/CARMIL1",2
GO:0046849,"GO:0046849","bone remodeling","1/120","74/12302",0.51690837885535,0.51690837885535,0.653254085558495,"TPP1",1
GO:0055017,"GO:0055017","cardiac muscle tissue growth","1/120","74/12302",0.51690837885535,0.51690837885535,0.653254085558495,"PRKAR1A",1
GO:0000075,"GO:0000075","cell cycle checkpoint","2/120","177/12302",0.517652256437746,0.517652256437746,0.653254085558495,"CNOT4/TNKS1BP1",2
GO:0009913,"GO:0009913","epidermal cell differentiation","2/120","177/12302",0.517652256437746,0.517652256437746,0.653254085558495,"PKP2/CASP3",2
GO:0098742,"GO:0098742","cell-cell adhesion via plasma-membrane adhesion molecules","2/120","177/12302",0.517652256437746,0.517652256437746,0.653254085558495,"NECTIN2/PTPN23",2
GO:0002367,"GO:0002367","cytokine production involved in immune response","1/120","75/12302",0.521649219102108,0.521649219102108,0.653254085558495,"GAS6",1
GO:0006497,"GO:0006497","protein lipidation","1/120","75/12302",0.521649219102108,0.521649219102108,0.653254085558495,"SVIP",1
GO:0010633,"GO:0010633","negative regulation of epithelial cell migration","1/120","75/12302",0.521649219102108,0.521649219102108,0.653254085558495,"PTPN23",1
GO:0015748,"GO:0015748","organophosphate ester transport","1/120","75/12302",0.521649219102108,0.521649219102108,0.653254085558495,"MTTP",1
GO:0018958,"GO:0018958","phenol-containing compound metabolic process","1/120","75/12302",0.521649219102108,0.521649219102108,0.653254085558495,"PNKD",1
GO:0045778,"GO:0045778","positive regulation of ossification","1/120","75/12302",0.521649219102108,0.521649219102108,0.653254085558495,"BMP7",1
GO:0048864,"GO:0048864","stem cell development","1/120","75/12302",0.521649219102108,0.521649219102108,0.653254085558495,"BMP7",1
GO:0097711,"GO:0097711","ciliary basal body-plasma membrane docking","1/120","75/12302",0.521649219102108,0.521649219102108,0.653254085558495,"PCM1",1
GO:0099175,"GO:0099175","regulation of postsynapse organization","1/120","75/12302",0.521649219102108,0.521649219102108,0.653254085558495,"LRP4",1
GO:0110020,"GO:0110020","regulation of actomyosin structure organization","1/120","75/12302",0.521649219102108,0.521649219102108,0.653254085558495,"CARMIL1",1
GO:1901800,"GO:1901800","positive regulation of proteasomal protein catabolic process","1/120","75/12302",0.521649219102108,0.521649219102108,0.653254085558495,"VCP",1
GO:1902106,"GO:1902106","negative regulation of leukocyte differentiation","1/120","75/12302",0.521649219102108,0.521649219102108,0.653254085558495,"MYC",1
GO:2000060,"GO:2000060","positive regulation of ubiquitin-dependent protein catabolic process","1/120","75/12302",0.521649219102108,0.521649219102108,0.653254085558495,"VCP",1
GO:2001169,"GO:2001169","regulation of ATP biosynthetic process","1/120","75/12302",0.521649219102108,0.521649219102108,0.653254085558495,"VCP",1
GO:0001654,"GO:0001654","eye development","3/120","282/12302",0.52170755362499,0.52170755362499,0.653254085558495,"RARG/BMP7/IFT122",3
GO:0033002,"GO:0033002","muscle cell proliferation","2/120","179/12302",0.523688560109274,0.523688560109274,0.655365997829126,"GNAI3/PRKAR1A",2
GO:0001708,"GO:0001708","cell fate specification","1/120","76/12302",0.526343918841026,0.526343918841026,0.655551540633564,"FOXA2",1
GO:0006690,"GO:0006690","icosanoid metabolic process","1/120","76/12302",0.526343918841026,0.526343918841026,0.655551540633564,"GPX1",1
GO:0010771,"GO:0010771","negative regulation of cell morphogenesis involved in differentiation","1/120","76/12302",0.526343918841026,0.526343918841026,0.655551540633564,"LRP4",1
GO:0014031,"GO:0014031","mesenchymal cell development","1/120","76/12302",0.526343918841026,0.526343918841026,0.655551540633564,"BMP7",1
GO:0014068,"GO:0014068","positive regulation of phosphatidylinositol 3-kinase signaling","1/120","76/12302",0.526343918841026,0.526343918841026,0.655551540633564,"MAZ",1
GO:0032612,"GO:0032612","interleukin-1 production","1/120","76/12302",0.526343918841026,0.526343918841026,0.655551540633564,"GAS6",1
GO:0048661,"GO:0048661","positive regulation of smooth muscle cell proliferation","1/120","76/12302",0.526343918841026,0.526343918841026,0.655551540633564,"GNAI3",1
GO:1901888,"GO:1901888","regulation of cell junction assembly","1/120","76/12302",0.526343918841026,0.526343918841026,0.655551540633564,"MYO1C",1
GO:0150063,"GO:0150063","visual system development","3/120","284/12302",0.526486925257765,0.526486925257765,0.655551540633564,"RARG/BMP7/IFT122",3
GO:0015837,"GO:0015837","amine transport","1/120","77/12302",0.530992923400087,0.530992923400087,0.658950908285621,"RAB3B",1
GO:0030219,"GO:0030219","megakaryocyte differentiation","1/120","77/12302",0.530992923400087,0.530992923400087,0.658950908285621,"CNOT4",1
GO:0032006,"GO:0032006","regulation of TOR signaling","1/120","77/12302",0.530992923400087,0.530992923400087,0.658950908285621,"GAS6",1
GO:0036473,"GO:0036473","cell death in response to oxidative stress","1/120","77/12302",0.530992923400087,0.530992923400087,0.658950908285621,"GPX1",1
GO:0043473,"GO:0043473","pigmentation","1/120","77/12302",0.530992923400087,0.530992923400087,0.658950908285621,"MREG",1
GO:2000379,"GO:2000379","positive regulation of reactive oxygen species metabolic process","1/120","77/12302",0.530992923400087,0.530992923400087,0.658950908285621,"GNAI3",1
GO:0001649,"GO:0001649","osteoblast differentiation","2/120","182/12302",0.53264870947014,0.53264870947014,0.660637455229055,"BMP7/ESRRA",2
GO:0048193,"GO:0048193","Golgi vesicle transport","3/120","287/12302",0.533607331063268,0.533607331063268,0.660996256193249,"NBAS/GAS6/VCP",3
GO:0048880,"GO:0048880","sensory system development","3/120","287/12302",0.533607331063268,0.533607331063268,0.660996256193249,"RARG/BMP7/IFT122",3
GO:0032787,"GO:0032787","monocarboxylic acid metabolic process","5/120","496/12302",0.534525860134558,0.534525860134558,0.660996256193249,"GPX1/CREM/PNKD/MPC1/SLC45A3",5
GO:0015672,"GO:0015672","monovalent inorganic cation transport","4/120","392/12302",0.534887065504265,0.534887065504265,0.660996256193249,"PKP2/SLC9A8/KCNH3/SLC22A4",4
GO:0002027,"GO:0002027","regulation of heart rate","1/120","78/12302",0.535596673845239,0.535596673845239,0.660996256193249,"PKP2",1
GO:0032231,"GO:0032231","regulation of actin filament bundle assembly","1/120","78/12302",0.535596673845239,0.535596673845239,0.660996256193249,"CARMIL1",1
GO:0090174,"GO:0090174","organelle membrane fusion","1/120","78/12302",0.535596673845239,0.535596673845239,0.660996256193249,"GNAI3",1
GO:1904019,"GO:1904019","epithelial cell apoptotic process","1/120","78/12302",0.535596673845239,0.535596673845239,0.660996256193249,"GAS6",1
GO:0048762,"GO:0048762","mesenchymal cell differentiation","2/120","183/12302",0.53561011057399,0.53561011057399,0.660996256193249,"FOXA2/BMP7",2
GO:0050714,"GO:0050714","positive regulation of protein secretion","2/120","184/12302",0.538558790179105,0.538558790179105,0.662931067631336,"IL17RC/PTPN23",2
GO:0097237,"GO:0097237","cellular response to toxic substance","2/120","184/12302",0.538558790179105,0.538558790179105,0.662931067631336,"GPX1/BMP7",2
GO:0000079,"GO:0000079","regulation of cyclin-dependent protein serine/threonine kinase activity","1/120","79/12302",0.540155607020842,0.540155607020842,0.662931067631336,"CASP3",1
GO:0002688,"GO:0002688","regulation of leukocyte chemotaxis","1/120","79/12302",0.540155607020842,0.540155607020842,0.662931067631336,"GAS6",1
GO:0009119,"GO:0009119","ribonucleoside metabolic process","1/120","79/12302",0.540155607020842,0.540155607020842,0.662931067631336,"GNAI3",1
GO:0014033,"GO:0014033","neural crest cell differentiation","1/120","79/12302",0.540155607020842,0.540155607020842,0.662931067631336,"BMP7",1
GO:0030038,"GO:0030038","contractile actin filament bundle assembly","1/120","79/12302",0.540155607020842,0.540155607020842,0.662931067631336,"CARMIL1",1
GO:0042136,"GO:0042136","neurotransmitter biosynthetic process","1/120","79/12302",0.540155607020842,0.540155607020842,0.662931067631336,"DPYD",1
GO:0043149,"GO:0043149","stress fiber assembly","1/120","79/12302",0.540155607020842,0.540155607020842,0.662931067631336,"CARMIL1",1
GO:0060419,"GO:0060419","heart growth","1/120","79/12302",0.540155607020842,0.540155607020842,0.662931067631336,"PRKAR1A",1
GO:0016358,"GO:0016358","dendrite development","2/120","186/12302",0.54441784515488,0.54441784515488,0.666268004090385,"BMP7/LRP4",2
GO:0006900,"GO:0006900","vesicle budding from membrane","1/120","80/12302",0.544670155589728,0.544670155589728,0.666268004090385,"SNX3",1
GO:0007009,"GO:0007009","plasma membrane organization","1/120","80/12302",0.544670155589728,0.544670155589728,0.666268004090385,"TLCD1",1
GO:0019217,"GO:0019217","regulation of fatty acid metabolic process","1/120","80/12302",0.544670155589728,0.544670155589728,0.666268004090385,"SLC45A3",1
GO:0042158,"GO:0042158","lipoprotein biosynthetic process","1/120","80/12302",0.544670155589728,0.544670155589728,0.666268004090385,"SVIP",1
GO:0072527,"GO:0072527","pyrimidine-containing compound metabolic process","1/120","80/12302",0.544670155589728,0.544670155589728,0.666268004090385,"DPYD",1
GO:0016485,"GO:0016485","protein processing","2/120","187/12302",0.547328155323337,0.547328155323337,0.66878447542253,"PCSK2/CASP3",2
GO:0034404,"GO:0034404","nucleobase-containing small molecule biosynthetic process","2/120","187/12302",0.547328155323337,0.547328155323337,0.66878447542253,"GPX1/VCP",2
GO:0030004,"GO:0030004","cellular monovalent inorganic cation homeostasis","1/120","81/12302",0.549140748072893,0.549140748072893,0.669896283878396,"SLC9A8",1
GO:0051817,"GO:0051817","modification of morphology or physiology of other organism involved in symbiotic interaction","1/120","81/12302",0.549140748072893,0.549140748072893,0.669896283878396,"NUCKS1",1
GO:1901989,"GO:1901989","positive regulation of cell cycle phase transition","1/120","81/12302",0.549140748072893,0.549140748072893,0.669896283878396,"DDX3X",1
GO:0006631,"GO:0006631","fatty acid metabolic process","3/120","295/12302",0.552301779920307,0.552301779920307,0.672349565451989,"GPX1/CREM/SLC45A3",3
GO:0043543,"GO:0043543","protein acylation","2/120","189/12302",0.55311019167619,0.55311019167619,0.672349565451989,"JADE1/NAA20",2
GO:0006637,"GO:0006637","acyl-CoA metabolic process","1/120","82/12302",0.553567808888804,0.553567808888804,0.672349565451989,"MPC1",1
GO:0007052,"GO:0007052","mitotic spindle organization","1/120","82/12302",0.553567808888804,0.553567808888804,0.672349565451989,"VCP",1
GO:0034446,"GO:0034446","substrate adhesion-dependent cell spreading","1/120","82/12302",0.553567808888804,0.553567808888804,0.672349565451989,"CARMIL1",1
GO:0035335,"GO:0035335","peptidyl-tyrosine dephosphorylation","1/120","82/12302",0.553567808888804,0.553567808888804,0.672349565451989,"PTPN23",1
GO:0035383,"GO:0035383","thioester metabolic process","1/120","82/12302",0.553567808888804,0.553567808888804,0.672349565451989,"MPC1",1
GO:0051341,"GO:0051341","regulation of oxidoreductase activity","1/120","82/12302",0.553567808888804,0.553567808888804,0.672349565451989,"GNAI3",1
GO:0072594,"GO:0072594","establishment of protein localization to organelle","4/120","402/12302",0.554942002933506,0.554942002933506,0.67365111416195,"TSPAN17/DDIT3/IFT122/UBB",4
GO:0060627,"GO:0060627","regulation of vesicle-mediated transport","4/120","403/12302",0.556922838189576,0.556922838189576,0.675096092105162,"RAB3B/PTPN23/SNX3/GAS6",4
GO:0008593,"GO:0008593","regulation of Notch signaling pathway","1/120","83/12302",0.557951758392351,0.557951758392351,0.675096092105162,"BMP7",1
GO:0043279,"GO:0043279","response to alkaloid","1/120","83/12302",0.557951758392351,0.557951758392351,0.675096092105162,"CASP3",1
GO:0071621,"GO:0071621","granulocyte chemotaxis","1/120","83/12302",0.557951758392351,0.557951758392351,0.675096092105162,"IL17RC",1
GO:1904029,"GO:1904029","regulation of cyclin-dependent protein kinase activity","1/120","83/12302",0.557951758392351,0.557951758392351,0.675096092105162,"CASP3",1
GO:2001237,"GO:2001237","negative regulation of extrinsic apoptotic signaling pathway","1/120","83/12302",0.557951758392351,0.557951758392351,0.675096092105162,"GPX1",1
GO:0050730,"GO:0050730","regulation of peptidyl-tyrosine phosphorylation","2/120","191/12302",0.558840604246634,0.558840604246634,0.675804269980062,"GAS6/LRP4",2
GO:0051098,"GO:0051098","regulation of binding","3/120","298/12302",0.559199287653711,0.559199287653711,0.675870903130235,"NUCKS1/DDIT3/CTBP2",3
GO:0042180,"GO:0042180","cellular ketone metabolic process","2/120","192/12302",0.561686391140096,0.561686391140096,0.678508562847361,"PNKD/SLC45A3",2
GO:0008645,"GO:0008645","hexose transmembrane transport","1/120","85/12302",0.5665919847951,0.5665919847951,0.682213456970559,"SLC45A3",1
GO:0042303,"GO:0042303","molting cycle","1/120","85/12302",0.5665919847951,0.5665919847951,0.682213456970559,"LRP4",1
GO:0042633,"GO:0042633","hair cycle","1/120","85/12302",0.5665919847951,0.5665919847951,0.682213456970559,"LRP4",1
GO:0072009,"GO:0072009","nephron epithelium development","1/120","85/12302",0.5665919847951,0.5665919847951,0.682213456970559,"MYC",1
GO:0098693,"GO:0098693","regulation of synaptic vesicle cycle","1/120","85/12302",0.5665919847951,0.5665919847951,0.682213456970559,"RAB3B",1
GO:2000736,"GO:2000736","regulation of stem cell differentiation","1/120","85/12302",0.5665919847951,0.5665919847951,0.682213456970559,"BMP7",1
GO:0032872,"GO:0032872","regulation of stress-activated MAPK cascade","2/120","195/12302",0.570145823971012,0.570145823971012,0.684746942685312,"MYC/MAP3K6",2
GO:2000027,"GO:2000027","regulation of animal organ morphogenesis","2/120","195/12302",0.570145823971012,0.570145823971012,0.684746942685312,"MYC/BMP7",2
GO:0031346,"GO:0031346","positive regulation of cell projection organization","3/120","303/12302",0.570554633009192,0.570554633009192,0.684746942685312,"BMP7/SNX3/CARMIL1",3
GO:0006304,"GO:0006304","DNA modification","1/120","86/12302",0.570849082431556,0.570849082431556,0.684746942685312,"MYC",1
GO:0007041,"GO:0007041","lysosomal transport","1/120","86/12302",0.570849082431556,0.570849082431556,0.684746942685312,"VCP",1
GO:0030218,"GO:0030218","erythrocyte differentiation","1/120","86/12302",0.570849082431556,0.570849082431556,0.684746942685312,"CASP3",1
GO:1903052,"GO:1903052","positive regulation of proteolysis involved in cellular protein catabolic process","1/120","86/12302",0.570849082431556,0.570849082431556,0.684746942685312,"VCP",1
GO:0001501,"GO:0001501","skeletal system development","4/120","411/12302",0.572601688752547,0.572601688752547,0.686145495070427,"SP5/RARG/BMP7/ESRRA",4
GO:0030900,"GO:0030900","forebrain development","3/120","304/12302",0.572804349750017,0.572804349750017,0.686145495070427,"PCM1/UBB/CASP3",3
GO:0071826,"GO:0071826","ribonucleoprotein complex subunit organization","2/120","196/12302",0.572939598850651,0.572939598850651,0.686145495070427,"DDX3X/VCP",2
GO:0015749,"GO:0015749","monosaccharide transmembrane transport","1/120","87/12302",0.57506471030551,0.57506471030551,0.687211832808517,"SLC45A3",1
GO:0046928,"GO:0046928","regulation of neurotransmitter secretion","1/120","87/12302",0.57506471030551,0.57506471030551,0.687211832808517,"PNKD",1
GO:0070252,"GO:0070252","actin-mediated cell contraction","1/120","87/12302",0.57506471030551,0.57506471030551,0.687211832808517,"PKP2",1
GO:1903008,"GO:1903008","organelle disassembly","1/120","87/12302",0.57506471030551,0.57506471030551,0.687211832808517,"VCP",1
GO:0034329,"GO:0034329","cell junction assembly","2/120","197/12302",0.575720329557779,0.575720329557779,0.687257512072641,"MYO1C/PKP2",2
GO:0070302,"GO:0070302","regulation of stress-activated protein kinase signaling cascade","2/120","197/12302",0.575720329557779,0.575720329557779,0.687257512072641,"MYC/MAP3K6",2
GO:0050808,"GO:0050808","synapse organization","3/120","306/12302",0.57728220112031,0.57728220112031,0.688752668454592,"CTBP2/VCP/LRP4",3
GO:0071560,"GO:0071560","cellular response to transforming growth factor beta stimulus","2/120","198/12302",0.578488002698541,0.578488002698541,0.688826956837393,"UBB/ING2",2
GO:0006342,"GO:0006342","chromatin silencing","1/120","88/12302",0.57923926902539,0.57923926902539,0.688826956837393,"RIF1",1
GO:0030282,"GO:0030282","bone mineralization","1/120","88/12302",0.57923926902539,0.57923926902539,0.688826956837393,"BMP7",1
GO:0032526,"GO:0032526","response to retinoic acid","1/120","88/12302",0.57923926902539,0.57923926902539,0.688826956837393,"RARG",1
GO:0046822,"GO:0046822","regulation of nucleocytoplasmic transport","1/120","88/12302",0.57923926902539,0.57923926902539,0.688826956837393,"GAS6",1
GO:0090101,"GO:0090101","negative regulation of transmembrane receptor protein serine/threonine kinase signaling pathway","1/120","88/12302",0.57923926902539,0.57923926902539,0.688826956837393,"UBB",1
GO:0018205,"GO:0018205","peptidyl-lysine modification","3/120","307/12302",0.579510281630551,0.579510281630551,0.688826956837393,"RIF1/EEF2KMT/JADE1",3
GO:0002793,"GO:0002793","positive regulation of peptide secretion","2/120","199/12302",0.581242606367129,0.581242606367129,0.690517391712901,"IL17RC/PTPN23",2
GO:0002687,"GO:0002687","positive regulation of leukocyte migration","1/120","89/12302",0.583373155362131,0.583373155362131,0.691572346612245,"GAS6",1
GO:0034219,"GO:0034219","carbohydrate transmembrane transport","1/120","89/12302",0.583373155362131,0.583373155362131,0.691572346612245,"SLC45A3",1
GO:0034968,"GO:0034968","histone lysine methylation","1/120","89/12302",0.583373155362131,0.583373155362131,0.691572346612245,"RIF1",1
GO:2000278,"GO:2000278","regulation of DNA biosynthetic process","1/120","89/12302",0.583373155362131,0.583373155362131,0.691572346612245,"MYC",1
GO:0045446,"GO:0045446","endothelial cell differentiation","1/120","90/12302",0.587466762285618,0.587466762285618,0.695684323759284,"GPX1",1
GO:0050715,"GO:0050715","positive regulation of cytokine secretion","1/120","90/12302",0.587466762285618,0.587466762285618,0.695684323759284,"IL17RC",1
GO:0046434,"GO:0046434","organophosphate catabolic process","2/120","202/12302",0.589427903232186,0.589427903232186,0.697264956281712,"GPX1/VCP",2
GO:0071559,"GO:0071559","response to transforming growth factor beta","2/120","202/12302",0.589427903232186,0.589427903232186,0.697264956281712,"UBB/ING2",2
GO:0002065,"GO:0002065","columnar/cuboidal epithelial cell differentiation","1/120","91/12302",0.591520479000794,0.591520479000794,0.698626727955705,"RARG",1
GO:0006119,"GO:0006119","oxidative phosphorylation","1/120","91/12302",0.591520479000794,0.591520479000794,0.698626727955705,"VCP",1
GO:0006664,"GO:0006664","glycolipid metabolic process","1/120","91/12302",0.591520479000794,0.591520479000794,0.698626727955705,"CREM",1
GO:0045927,"GO:0045927","positive regulation of growth","2/120","203/12302",0.592130138768013,0.592130138768013,0.698975968909051,"EXOSC9/DDX3X",2
GO:0006275,"GO:0006275","regulation of DNA replication","1/120","92/12302",0.595534690983424,0.595534690983424,0.700395290922202,"NUCKS1",1
GO:0007098,"GO:0007098","centrosome cycle","1/120","92/12302",0.595534690983424,0.595534690983424,0.700395290922202,"PCM1",1
GO:0014013,"GO:0014013","regulation of gliogenesis","1/120","92/12302",0.595534690983424,0.595534690983424,0.700395290922202,"SLC45A3",1
GO:0030808,"GO:0030808","regulation of nucleotide biosynthetic process","1/120","92/12302",0.595534690983424,0.595534690983424,0.700395290922202,"VCP",1
GO:0044106,"GO:0044106","cellular amine metabolic process","1/120","92/12302",0.595534690983424,0.595534690983424,0.700395290922202,"PNKD",1
GO:1900371,"GO:1900371","regulation of purine nucleotide biosynthetic process","1/120","92/12302",0.595534690983424,0.595534690983424,0.700395290922202,"VCP",1
GO:1903509,"GO:1903509","liposaccharide metabolic process","1/120","92/12302",0.595534690983424,0.595534690983424,0.700395290922202,"CREM",1
GO:0001503,"GO:0001503","ossification","3/120","315/12302",0.597071353260901,0.597071353260901,0.701365259691259,"BMP7/ESRRA/LRP4",3
GO:0045787,"GO:0045787","positive regulation of cell cycle","3/120","315/12302",0.597071353260901,0.597071353260901,0.701365259691259,"CNOT4/DDX3X/TNKS1BP1",3
GO:0060047,"GO:0060047","heart contraction","2/120","205/12302",0.597495283436027,0.597495283436027,0.701365259691259,"GPX1/PKP2",2
GO:0051346,"GO:0051346","negative regulation of hydrolase activity","3/120","316/12302",0.599233198439038,0.599233198439038,0.701365259691259,"GPX1/DDX3X/GAS6",3
GO:0009855,"GO:0009855","determination of bilateral symmetry","1/120","93/12302",0.599509780015528,0.599509780015528,0.701365259691259,"DDIT3",1
GO:0034101,"GO:0034101","erythrocyte homeostasis","1/120","93/12302",0.599509780015528,0.599509780015528,0.701365259691259,"CASP3",1
GO:0050671,"GO:0050671","positive regulation of lymphocyte proliferation","1/120","93/12302",0.599509780015528,0.599509780015528,0.701365259691259,"PELI1",1
GO:0051209,"GO:0051209","release of sequestered calcium ion into cytosol","1/120","93/12302",0.599509780015528,0.599509780015528,0.701365259691259,"DDIT3",1
GO:0097530,"GO:0097530","granulocyte migration","1/120","93/12302",0.599509780015528,0.599509780015528,0.701365259691259,"IL17RC",1
GO:1903828,"GO:1903828","negative regulation of cellular protein localization","1/120","93/12302",0.599509780015528,0.599509780015528,0.701365259691259,"SVIP",1
GO:0030100,"GO:0030100","regulation of endocytosis","2/120","206/12302",0.600158186798675,0.600158186798675,0.701755066938964,"SNX3/GAS6",2
GO:0006163,"GO:0006163","purine nucleotide metabolic process","4/120","426/12302",0.601161328987176,0.601161328987176,0.702382809761688,"GNAI3/GPX1/MPC1/VCP",4
GO:0043062,"GO:0043062","extracellular structure organization","3/120","317/12302",0.601387576309957,0.601387576309957,0.702382809761688,"BMP7/GAS6/MTTP",3
GO:0003007,"GO:0003007","heart morphogenesis","2/120","207/12302",0.602807975817591,0.602807975817591,0.702382809761688,"PKP2/BMP7",2
GO:0009799,"GO:0009799","specification of symmetry","1/120","94/12302",0.60344612422047,0.60344612422047,0.702382809761688,"DDIT3",1
GO:0032946,"GO:0032946","positive regulation of mononuclear cell proliferation","1/120","94/12302",0.60344612422047,0.60344612422047,0.702382809761688,"PELI1",1
GO:0042752,"GO:0042752","regulation of circadian rhythm","1/120","94/12302",0.60344612422047,0.60344612422047,0.702382809761688,"CREM",1
GO:0045598,"GO:0045598","regulation of fat cell differentiation","1/120","94/12302",0.60344612422047,0.60344612422047,0.702382809761688,"DDIT3",1
GO:1901222,"GO:1901222","regulation of NIK/NF-kappaB signaling","1/120","94/12302",0.60344612422047,0.60344612422047,0.702382809761688,"BMP7",1
GO:0007015,"GO:0007015","actin filament organization","3/120","318/12302",0.603534467763784,0.603534467763784,0.702382809761688,"PLEKHH2/MYO1C/CARMIL1",3
GO:0043270,"GO:0043270","positive regulation of ion transport","2/120","208/12302",0.605444650796607,0.605444650796607,0.704237714587705,"RAB3B/PKP2",2
GO:0050709,"GO:0050709","negative regulation of protein secretion","1/120","95/12302",0.607344098097726,0.607344098097726,0.704606438373436,"GAS6",1
GO:0050729,"GO:0050729","positive regulation of inflammatory response","1/120","95/12302",0.607344098097726,0.607344098097726,0.704606438373436,"IL17RC",1
GO:0051282,"GO:0051282","regulation of sequestering of calcium ion","1/120","95/12302",0.607344098097726,0.607344098097726,0.704606438373436,"DDIT3",1
GO:0051283,"GO:0051283","negative regulation of sequestering of calcium ion","1/120","95/12302",0.607344098097726,0.607344098097726,0.704606438373436,"DDIT3",1
GO:1903578,"GO:1903578","regulation of ATP metabolic process","1/120","95/12302",0.607344098097726,0.607344098097726,0.704606438373436,"VCP",1
GO:0008637,"GO:0008637","apoptotic mitochondrial changes","1/120","96/12302",0.611204072557321,0.611204072557321,0.708715248606762,"GPX1",1
GO:0009410,"GO:0009410","response to xenobiotic stimulus","2/120","211/12302",0.613276012869263,0.613276012869263,0.710377768343552,"CASP9/GPX1",2
GO:0098656,"GO:0098656","anion transmembrane transport","2/120","211/12302",0.613276012869263,0.613276012869263,0.710377768343552,"SLC9A8/MPC1",2
GO:0003279,"GO:0003279","cardiac septum development","1/120","97/12302",0.615026414953939,0.615026414953939,0.711295074574207,"BMP7",1
GO:0043200,"GO:0043200","response to amino acid","1/120","97/12302",0.615026414953939,0.615026414953939,0.711295074574207,"CASP3",1
GO:0051101,"GO:0051101","regulation of DNA binding","1/120","97/12302",0.615026414953939,0.615026414953939,0.711295074574207,"DDIT3",1
GO:0015980,"GO:0015980","energy derivation by oxidation of organic compounds","2/120","212/12302",0.615860259011852,0.615860259011852,0.711520196547711,"MYC/VCP",2
GO:0051091,"GO:0051091","positive regulation of DNA-binding transcription factor activity","2/120","212/12302",0.615860259011852,0.615860259011852,0.711520196547711,"DDIT3/UBB",2
GO:0001818,"GO:0001818","negative regulation of cytokine production","2/120","213/12302",0.618431410643824,0.618431410643824,0.711606295938624,"OTUD5/GAS6",2
GO:0034612,"GO:0034612","response to tumor necrosis factor","2/120","213/12302",0.618431410643824,0.618431410643824,0.711606295938624,"GAS6/CASP3",2
GO:0002576,"GO:0002576","platelet degranulation","1/120","98/12302",0.618811489120717,0.618811489120717,0.711606295938624,"GAS6",1
GO:0002792,"GO:0002792","negative regulation of peptide secretion","1/120","98/12302",0.618811489120717,0.618811489120717,0.711606295938624,"GAS6",1
GO:0006997,"GO:0006997","nucleus organization","1/120","98/12302",0.618811489120717,0.618811489120717,0.711606295938624,"NECTIN2",1
GO:0016079,"GO:0016079","synaptic vesicle exocytosis","1/120","98/12302",0.618811489120717,0.618811489120717,0.711606295938624,"CTBP2",1
GO:0034605,"GO:0034605","cellular response to heat","1/120","98/12302",0.618811489120717,0.618811489120717,0.711606295938624,"VCP",1
GO:0048706,"GO:0048706","embryonic skeletal system development","1/120","98/12302",0.618811489120717,0.618811489120717,0.711606295938624,"BMP7",1
GO:0051208,"GO:0051208","sequestering of calcium ion","1/120","98/12302",0.618811489120717,0.618811489120717,0.711606295938624,"DDIT3",1
GO:0002526,"GO:0002526","acute inflammatory response","1/120","99/12302",0.622559655402716,0.622559655402716,0.714440407583693,"EIF2AK1",1
GO:0009308,"GO:0009308","amine metabolic process","1/120","99/12302",0.622559655402716,0.622559655402716,0.714440407583693,"PNKD",1
GO:0045814,"GO:0045814","negative regulation of gene expression, epigenetic","1/120","99/12302",0.622559655402716,0.622559655402716,0.714440407583693,"RIF1",1
GO:0050921,"GO:0050921","positive regulation of chemotaxis","1/120","99/12302",0.622559655402716,0.622559655402716,0.714440407583693,"GAS6",1
GO:0003015,"GO:0003015","heart process","2/120","215/12302",0.623534460858514,0.623534460858514,0.715190425291226,"GPX1/PKP2",2
GO:0031023,"GO:0031023","microtubule organizing center organization","1/120","100/12302",0.626271270690078,0.626271270690078,0.717590127859531,"PCM1",1
GO:0048284,"GO:0048284","organelle fusion","1/120","100/12302",0.626271270690078,0.626271270690078,0.717590127859531,"GNAI3",1
GO:0051258,"GO:0051258","protein polymerization","2/120","217/12302",0.628585235297642,0.628585235297642,0.718841752447377,"MYO1C/CARMIL1",2
GO:0010256,"GO:0010256","endomembrane system organization","3/120","330/12302",0.628707136413782,0.628707136413782,0.718841752447377,"NECTIN2/TLCD1/SNX3",3
GO:0002062,"GO:0002062","chondrocyte differentiation","1/120","101/12302",0.629946688450871,0.629946688450871,0.718841752447377,"RARG",1
GO:0010811,"GO:0010811","positive regulation of cell-substrate adhesion","1/120","101/12302",0.629946688450871,0.629946688450871,0.718841752447377,"CARMIL1",1
GO:0030534,"GO:0030534","adult behavior","1/120","101/12302",0.629946688450871,0.629946688450871,0.718841752447377,"FOXA2",1
GO:0070665,"GO:0070665","positive regulation of leukocyte proliferation","1/120","101/12302",0.629946688450871,0.629946688450871,0.718841752447377,"PELI1",1
GO:1903825,"GO:1903825","organic acid transmembrane transport","1/120","101/12302",0.629946688450871,0.629946688450871,0.718841752447377,"MPC1",1
GO:1905039,"GO:1905039","carboxylic acid transmembrane transport","1/120","101/12302",0.629946688450871,0.629946688450871,0.718841752447377,"MPC1",1
GO:0003158,"GO:0003158","endothelium development","1/120","102/12302",0.633586258763623,0.633586258763623,0.721880408819991,"GPX1",1
GO:0007224,"GO:0007224","smoothened signaling pathway","1/120","102/12302",0.633586258763623,0.633586258763623,0.721880408819991,"IFT122",1
GO:1902850,"GO:1902850","microtubule cytoskeleton organization involved in mitosis","1/120","102/12302",0.633586258763623,0.633586258763623,0.721880408819991,"VCP",1
GO:0007600,"GO:0007600","sensory perception","4/120","444/12302",0.6339065670359,0.6339065670359,0.721880408819991,"BBS10/GRXCR2/GPX1/CASP3",4
GO:0007283,"GO:0007283","spermatogenesis","3/120","334/12302",0.636853428759628,0.636853428759628,0.723031034100171,"NECTIN2/CREM/ING2",3
GO:0048568,"GO:0048568","embryonic organ development","3/120","334/12302",0.636853428759628,0.636853428759628,0.723031034100171,"RARG/BMP7/IFT122",3
GO:0014066,"GO:0014066","regulation of phosphatidylinositol 3-kinase signaling","1/120","103/12302",0.637190328349555,0.637190328349555,0.723031034100171,"MAZ",1
GO:0035023,"GO:0035023","regulation of Rho protein signal transduction","1/120","103/12302",0.637190328349555,0.637190328349555,0.723031034100171,"ARHGEF3",1
GO:0050777,"GO:0050777","negative regulation of immune response","1/120","103/12302",0.637190328349555,0.637190328349555,0.723031034100171,"GPX1",1
GO:0061337,"GO:0061337","cardiac conduction","1/120","103/12302",0.637190328349555,0.637190328349555,0.723031034100171,"PKP2",1
GO:0072655,"GO:0072655","establishment of protein localization to mitochondrion","1/120","103/12302",0.637190328349555,0.637190328349555,0.723031034100171,"DDIT3",1
GO:0031503,"GO:0031503","protein-containing complex localization","2/120","221/12302",0.638530327474468,0.638530327474468,0.723647561629818,"PCM1/IFT122",2
GO:0003231,"GO:0003231","cardiac ventricle development","1/120","104/12302",0.640759240604498,0.640759240604498,0.723647561629818,"PKP2",1
GO:0044344,"GO:0044344","cellular response to fibroblast growth factor stimulus","1/120","104/12302",0.640759240604498,0.640759240604498,0.723647561629818,"EGR3",1
GO:0051291,"GO:0051291","protein heterooligomerization","1/120","104/12302",0.640759240604498,0.640759240604498,0.723647561629818,"LRP4",1
GO:0060359,"GO:0060359","response to ammonium ion","1/120","104/12302",0.640759240604498,0.640759240604498,0.723647561629818,"CASP3",1
GO:0097553,"GO:0097553","calcium ion transmembrane import into cytosol","1/120","104/12302",0.640759240604498,0.640759240604498,0.723647561629818,"DDIT3",1
GO:1903364,"GO:1903364","positive regulation of cellular protein catabolic process","1/120","104/12302",0.640759240604498,0.640759240604498,0.723647561629818,"VCP",1
GO:0009152,"GO:0009152","purine ribonucleotide biosynthetic process","2/120","222/12302",0.640984086031821,0.640984086031821,0.723647561629818,"MPC1/VCP",2
GO:0031647,"GO:0031647","regulation of protein stability","2/120","222/12302",0.640984086031821,0.640984086031821,0.723647561629818,"ISOC2/CASP3",2
GO:0048562,"GO:0048562","embryonic organ morphogenesis","2/120","222/12302",0.640984086031821,0.640984086031821,0.723647561629818,"RARG/BMP7",2
GO:0010976,"GO:0010976","positive regulation of neuron projection development","2/120","223/12302",0.643424870279221,0.643424870279221,0.725911146845599,"BMP7/SNX3",2
GO:0009593,"GO:0009593","detection of chemical stimulus","1/120","105/12302",0.644293335630524,0.644293335630524,0.725911146845599,"FOXA2",1
GO:0016999,"GO:0016999","antibiotic metabolic process","1/120","105/12302",0.644293335630524,0.644293335630524,0.725911146845599,"GPX1",1
GO:0060048,"GO:0060048","cardiac muscle contraction","1/120","105/12302",0.644293335630524,0.644293335630524,0.725911146845599,"PKP2",1
GO:0032103,"GO:0032103","positive regulation of response to external stimulus","2/120","224/12302",0.645852697572902,0.645852697572902,0.727299978897686,"IL17RC/GAS6",2
GO:0008037,"GO:0008037","cell recognition","1/120","106/12302",0.647792950267265,0.647792950267265,0.728503276712301,"CASP3",1
GO:0070585,"GO:0070585","protein localization to mitochondrion","1/120","106/12302",0.647792950267265,0.647792950267265,0.728503276712301,"DDIT3",1
GO:0071396,"GO:0071396","cellular response to lipid","4/120","452/12302",0.647902914182429,0.647902914182429,0.728503276712301,"CASP9/RARG/BMP7/ESRRA",4
GO:0042552,"GO:0042552","myelination","1/120","108/12302",0.654690069605135,0.654690069605135,0.735391947110765,"RARG",1
GO:0071774,"GO:0071774","response to fibroblast growth factor","1/120","108/12302",0.654690069605135,0.654690069605135,0.735391947110765,"EGR3",1
GO:0022613,"GO:0022613","ribonucleoprotein complex biogenesis","3/120","344/12302",0.656677984792653,0.656677984792653,0.736039329647499,"EXOSC9/DDX3X/MRM2",3
GO:0002831,"GO:0002831","regulation of response to biotic stimulus","1/120","109/12302",0.658088231951156,0.658088231951156,0.736039329647499,"NECTIN2",1
GO:0031497,"GO:0031497","chromatin assembly","1/120","109/12302",0.658088231951156,0.658088231951156,0.736039329647499,"BAHD1",1
GO:0032680,"GO:0032680","regulation of tumor necrosis factor production","1/120","109/12302",0.658088231951156,0.658088231951156,0.736039329647499,"GAS6",1
GO:0033865,"GO:0033865","nucleoside bisphosphate metabolic process","1/120","109/12302",0.658088231951156,0.658088231951156,0.736039329647499,"MPC1",1
GO:0033875,"GO:0033875","ribonucleoside bisphosphate metabolic process","1/120","109/12302",0.658088231951156,0.658088231951156,0.736039329647499,"MPC1",1
GO:0034032,"GO:0034032","purine nucleoside bisphosphate metabolic process","1/120","109/12302",0.658088231951156,0.658088231951156,0.736039329647499,"MPC1",1
GO:0035270,"GO:0035270","endocrine system development","1/120","109/12302",0.658088231951156,0.658088231951156,0.736039329647499,"FOXA2",1
GO:0044262,"GO:0044262","cellular carbohydrate metabolic process","2/120","230/12302",0.660148647250994,0.660148647250994,0.736039329647499,"FOXA2/SLC45A3",2
GO:0001508,"GO:0001508","action potential","1/120","110/12302",0.661453229258288,0.661453229258288,0.736039329647499,"PKP2",1
GO:0007272,"GO:0007272","ensheathment of neurons","1/120","110/12302",0.661453229258288,0.661453229258288,0.736039329647499,"RARG",1
GO:0008366,"GO:0008366","axon ensheathment","1/120","110/12302",0.661453229258288,0.661453229258288,0.736039329647499,"RARG",1
GO:0016571,"GO:0016571","histone methylation","1/120","110/12302",0.661453229258288,0.661453229258288,0.736039329647499,"RIF1",1
GO:0031123,"GO:0031123","RNA 3'-end processing","1/120","110/12302",0.661453229258288,0.661453229258288,0.736039329647499,"EXOSC9",1
GO:0035725,"GO:0035725","sodium ion transmembrane transport","1/120","110/12302",0.661453229258288,0.661453229258288,0.736039329647499,"SLC9A8",1
GO:0045807,"GO:0045807","positive regulation of endocytosis","1/120","110/12302",0.661453229258288,0.661453229258288,0.736039329647499,"GAS6",1
GO:0061041,"GO:0061041","regulation of wound healing","1/120","110/12302",0.661453229258288,0.661453229258288,0.736039329647499,"FOXA2",1
[truncated: 333 more rows]

## Sheet: cluster2
,"ID","Description","GeneRatio","BgRatio","pvalue","p.adjust","qvalue","geneID","Count"
GO:1901652,"GO:1901652","response to peptide","32/450","414/12302",5.35171963569512e-05,5.35171963569512e-05,0.101204978803551,"ATP6V1E2/ADCY3/PRKAR2B/KLF15/HDAC5/SLC2A8/ADCY9/RAP1B/FOXO3/CA2/DNM1/MMP9/GRB14/CREB1/JUND/CPEB2/GGH/MYO5A/ATP6V1G1/MDM2/SIRT1/IRS4/EDN1/FABP3/ATP6V0E2/ACVR1C/KAT2B/SIK2/ID1/PAK1/SOCS2/NGFR",32
GO:1901653,"GO:1901653","cellular response to peptide","26/450","308/12302",6.43761417051227e-05,6.43761417051227e-05,0.101204978803551,"ATP6V1E2/ADCY3/PRKAR2B/KLF15/HDAC5/SLC2A8/ADCY9/RAP1B/FOXO3/CA2/GRB14/CREB1/CPEB2/MYO5A/ATP6V1G1/MDM2/SIRT1/IRS4/EDN1/ATP6V0E2/KAT2B/SIK2/ID1/PAK1/SOCS2/NGFR",26
GO:0071375,"GO:0071375","cellular response to peptide hormone stimulus","23/450","261/12302",8.8689425044947e-05,8.8689425044947e-05,0.101204978803551,"ATP6V1E2/ADCY3/PRKAR2B/HDAC5/SLC2A8/ADCY9/RAP1B/FOXO3/CA2/GRB14/CREB1/CPEB2/MYO5A/ATP6V1G1/MDM2/SIRT1/IRS4/EDN1/ATP6V0E2/KAT2B/SIK2/PAK1/SOCS2",23
GO:0043434,"GO:0043434","response to peptide hormone","28/450","353/12302",0.00010088639020291,0.00010088639020291,0.101204978803551,"ATP6V1E2/ADCY3/PRKAR2B/KLF15/HDAC5/SLC2A8/ADCY9/RAP1B/FOXO3/CA2/GRB14/CREB1/JUND/CPEB2/GGH/MYO5A/ATP6V1G1/MDM2/SIRT1/IRS4/EDN1/FABP3/ATP6V0E2/ACVR1C/KAT2B/SIK2/PAK1/SOCS2",28
GO:0001667,"GO:0001667","ameboidal-type cell migration","27/450","351/12302",0.00022124108817828,0.00022124108817828,0.177551795396969,"GLUL/EPHB4/FN1/JUN/JUP/HSPB1/HDAC5/HBEGF/SEMA4F/HIF1A/MMP9/SEMA3F/NF1/TGFBR1/DLL4/PRKCE/MAPRE2/SIRT1/MTA2/IQSEC1/EDN1/ACVR1C/AGO2/ID1/BMPER/PAK1/ITGA2",27
GO:0051547,"GO:0051547","regulation of keratinocyte migration","4/450","10/12302",0.000311232489057545,0.000311232489057545,0.208143552331116,"HBEGF/MMP9/MAPRE2/IQSEC1",4
GO:0032868,"GO:0032868","response to insulin","19/450","221/12302",0.000488163680041524,0.000488163680041524,0.272362281729703,"ATP6V1E2/KLF15/HDAC5/SLC2A8/FOXO3/GRB14/CPEB2/GGH/MYO5A/ATP6V1G1/SIRT1/IRS4/FABP3/ATP6V0E2/ACVR1C/KAT2B/SIK2/PAK1/SOCS2",19
GO:0033673,"GO:0033673","negative regulation of kinase activity","17/450","189/12302",0.000571736947275816,0.000571736947275816,0.272362281729703,"MIDN/PRKAR2B/HSPB1/DUSP4/DVL1/PPP2R5A/NF1/SFN/DUSP6/SIRT1/PTPN6/UBASH3B/TAF7/KAT2B/TRIB2/HIPK3/SMYD3",17
GO:0035020,"GO:0035020","regulation of Rac protein signal transduction","4/450","12/12302",0.000691990859229552,0.000691990859229552,0.272362281729703,"DYNLT1/NF1/SSX2IP/CADM4",4
GO:0051546,"GO:0051546","keratinocyte migration","4/450","12/12302",0.000691990859229552,0.000691990859229552,0.272362281729703,"HBEGF/MMP9/MAPRE2/IQSEC1",4
GO:0051348,"GO:0051348","negative regulation of transferase activity","18/450","211/12302",0.000746638469064898,0.000746638469064898,0.272362281729703,"MIDN/PRKAR2B/HSPB1/DUSP4/DVL1/PPP2R5A/NF1/SFN/DUSP6/SIRT1/PTPN6/SMAD7/UBASH3B/TAF7/KAT2B/TRIB2/HIPK3/SMYD3",18
GO:0002446,"GO:0002446","neutrophil mediated immunity","26/450","368/12302",0.00103535197843691,0.00103535197843691,0.324556455595228,"DYNLT1/HEBP2/UNC13D/AGPAT2/JUP/CYB5R3/STK10/RHOF/RAP1B/ALDH3B1/WDR1/MMP9/KMT2E/CD55/FABP5/PDXK/GGH/DNASE1L3/ARL8A/PTPN6/DSP/PPIA/RHOG/TSPAN14/HGSNAT/GM2A",26
GO:0010631,"GO:0010631","epithelial cell migration","20/450","260/12302",0.00141237459154834,0.00141237459154834,0.324556455595228,"GLUL/EPHB4/JUN/JUP/HSPB1/HDAC5/HBEGF/HIF1A/MMP9/NF1/TGFBR1/DLL4/PRKCE/MAPRE2/SIRT1/IQSEC1/EDN1/ID1/BMPER/ITGA2",20
GO:0006469,"GO:0006469","negative regulation of protein kinase activity","15/450","171/12302",0.00152530628135847,0.00152530628135847,0.324556455595228,"PRKAR2B/HSPB1/DUSP4/DVL1/NF1/SFN/DUSP6/SIRT1/PTPN6/UBASH3B/TAF7/KAT2B/TRIB2/HIPK3/SMYD3",15
GO:0090132,"GO:0090132","epithelium migration","20/450","262/12302",0.00154854202387717,0.00154854202387717,0.324556455595228,"GLUL/EPHB4/JUN/JUP/HSPB1/HDAC5/HBEGF/HIF1A/MMP9/NF1/TGFBR1/DLL4/PRKCE/MAPRE2/SIRT1/IQSEC1/EDN1/ID1/BMPER/ITGA2",20
GO:0009896,"GO:0009896","positive regulation of catabolic process","24/450","339/12302",0.00155332488745897,0.00155332488745897,0.324556455595228,"MAPK9/DAPK1/RC3H1/KHSRP/FOXO3/DVL1/HIF1A/TICAM1/TOB1/RDX/STX5/TFEB/PRKCE/MDM2/SIRT1/RNF19B/SMAD7/TBK1/AGO2/EGLN2/PRXL2C/TRIB2/LDLR/DNAJB2",24
GO:0006744,"GO:0006744","ubiquinone biosynthetic process","4/450","15/12302",0.00174860895033538,0.00174860895033538,0.324556455595228,"COQ5/PPTC7/COQ10B/COQ10A",4
GO:0071404,"GO:0071404","cellular response to low-density lipoprotein particle stimulus","4/450","15/12302",0.00174860895033538,0.00174860895033538,0.324556455595228,"ABCA1/CD9/SREBF2/LDLR",4
GO:1901663,"GO:1901663","quinone biosynthetic process","4/450","15/12302",0.00174860895033538,0.00174860895033538,0.324556455595228,"COQ5/PPTC7/COQ10B/COQ10A",4
GO:0032869,"GO:0032869","cellular response to insulin stimulus","15/450","174/12302",0.0018127558370014,0.0018127558370014,0.324556455595228,"ATP6V1E2/HDAC5/SLC2A8/FOXO3/GRB14/CPEB2/MYO5A/ATP6V1G1/SIRT1/IRS4/ATP6V0E2/KAT2B/SIK2/PAK1/SOCS2",15
GO:0090130,"GO:0090130","tissue migration","20/450","266/12302",0.00185464061461706,0.00185464061461706,0.324556455595228,"GLUL/EPHB4/JUN/JUP/HSPB1/HDAC5/HBEGF/HIF1A/MMP9/NF1/TGFBR1/DLL4/PRKCE/MAPRE2/SIRT1/IQSEC1/EDN1/ID1/BMPER/ITGA2",20
GO:0055094,"GO:0055094","response to lipoprotein particle","5/450","25/12302",0.00185532559739524,0.00185532559739524,0.324556455595228,"ABCA1/CD9/TICAM1/SREBF2/LDLR",5
GO:0042119,"GO:0042119","neutrophil activation","25/450","364/12302",0.00189757386617977,0.00189757386617977,0.324556455595228,"DYNLT1/HEBP2/UNC13D/AGPAT2/JUP/CYB5R3/STK10/RHOF/RAP1B/ALDH3B1/MMP9/KMT2E/CD55/FABP5/PDXK/GGH/DNASE1L3/ARL8A/PTPN6/DSP/PPIA/RHOG/TSPAN14/HGSNAT/GM2A",25
GO:0002444,"GO:0002444","myeloid leukocyte mediated immunity","27/450","405/12302",0.00194948161565651,0.00194948161565651,0.324556455595228,"DYNLT1/HEBP2/UNC13D/AGPAT2/JUP/CYB5R3/STK10/RHOF/RAP1B/ALDH3B1/WDR1/TICAM1/MMP9/KMT2E/CD55/FABP5/PDXK/GGH/DNASE1L3/ARL8A/PTPN6/DSP/PPIA/RHOG/TSPAN14/HGSNAT/GM2A",27
GO:0036230,"GO:0036230","granulocyte activation","25/450","368/12302",0.00219950782533207,0.00219950782533207,0.324556455595228,"DYNLT1/HEBP2/UNC13D/AGPAT2/JUP/CYB5R3/STK10/RHOF/RAP1B/ALDH3B1/MMP9/KMT2E/CD55/FABP5/PDXK/GGH/DNASE1L3/ARL8A/PTPN6/DSP/PPIA/RHOG/TSPAN14/HGSNAT/GM2A",25
GO:0034109,"GO:0034109","homotypic cell-cell adhesion","8/450","64/12302",0.00220960538381669,0.00220960538381669,0.324556455595228,"CXADR/JUP/HSPB1/CD9/RDX/PTPN6/DSP/UBASH3B",8
GO:0010632,"GO:0010632","regulation of epithelial cell migration","17/450","214/12302",0.00224270817691752,0.00224270817691752,0.324556455595228,"GLUL/JUN/JUP/HSPB1/HDAC5/HBEGF/HIF1A/MMP9/NF1/DLL4/PRKCE/MAPRE2/SIRT1/IQSEC1/EDN1/BMPER/ITGA2",17
GO:0006743,"GO:0006743","ubiquinone metabolic process","4/450","16/12302",0.00226474336800448,0.00226474336800448,0.324556455595228,"COQ5/PPTC7/COQ10B/COQ10A",4
GO:0031331,"GO:0031331","positive regulation of cellular catabolic process","21/450","291/12302",0.00237836100162958,0.00237836100162958,0.329085740043992,"MAPK9/DAPK1/RC3H1/KHSRP/FOXO3/DVL1/HIF1A/TICAM1/TOB1/RDX/TFEB/MDM2/SIRT1/RNF19B/SMAD7/TBK1/AGO2/PRXL2C/TRIB2/LDLR/DNAJB2",21
GO:0016601,"GO:0016601","Rac protein signal transduction","5/450","27/12302",0.00265463253825193,0.00265463253825193,0.341123894006917,"DYNLT1/NF1/SSX2IP/RHOG/CADM4",5
GO:0071402,"GO:0071402","cellular response to lipoprotein particle stimulus","5/450","27/12302",0.00265463253825193,0.00265463253825193,0.341123894006917,"ABCA1/CD9/TICAM1/SREBF2/LDLR",5
GO:0002274,"GO:0002274","myeloid leukocyte activation","30/450","477/12302",0.00272040041390616,0.00272040041390616,0.341123894006917,"DYNLT1/HEBP2/UNC13D/AGPAT2/JUN/JUP/CYB5R3/STK10/RHOF/RAP1B/ALDH3B1/TICAM1/MMP9/KMT2E/CD55/MYO18A/FABP5/PRKCE/PDXK/GGH/DNASE1L3/ARL8A/PTPN6/DSP/PPIA/RHOG/LDLR/TSPAN14/HGSNAT/GM2A",30
GO:0002275,"GO:0002275","myeloid cell activation involved in immune response","26/450","397/12302",0.00298907344195882,0.00298907344195882,0.361171798192997,"DYNLT1/HEBP2/UNC13D/AGPAT2/JUP/CYB5R3/STK10/RHOF/RAP1B/ALDH3B1/TICAM1/MMP9/CD55/FABP5/PRKCE/PDXK/GGH/DNASE1L3/ARL8A/PTPN6/DSP/PPIA/RHOG/TSPAN14/HGSNAT/GM2A",26
GO:0002283,"GO:0002283","neutrophil activation involved in immune response","24/450","357/12302",0.00306029619140446,0.00306029619140446,0.361171798192997,"DYNLT1/HEBP2/UNC13D/AGPAT2/JUP/CYB5R3/STK10/RHOF/RAP1B/ALDH3B1/MMP9/CD55/FABP5/PDXK/GGH/DNASE1L3/ARL8A/PTPN6/DSP/PPIA/RHOG/TSPAN14/HGSNAT/GM2A",24
GO:0008286,"GO:0008286","insulin receptor signaling pathway","11/450","115/12302",0.00322803618232999,0.00322803618232999,0.370083426377201,"ATP6V1E2/SLC2A8/FOXO3/GRB14/ATP6V1G1/SIRT1/IRS4/ATP6V0E2/SIK2/PAK1/SOCS2",11
GO:0042326,"GO:0042326","negative regulation of phosphorylation","24/450","361/12302",0.00352618991967014,0.00352618991967014,0.388335718521392,"MIDN/PRKAR2B/JUN/HSPB1/TARDBP/RANBP9/DUSP4/DVL1/PPP2R5A/NF1/SFN/DUSP6/SIRT1/PTPN6/SMAD7/EMILIN1/BTN2A2/UBASH3B/TAF7/KAT2B/TRIB2/CADM4/HIPK3/SMYD3",24
GO:0006346,"GO:0006346","methylation-dependent chromatin silencing","4/450","18/12302",0.00359330208304451,0.00359330208304451,0.388335718521392,"TASOR/SIRT1/DNMT3A/MORC2",4
GO:0046189,"GO:0046189","phenol-containing compound biosynthetic process","5/450","29/12302",0.00367757592828496,0.00367757592828496,0.388335718521392,"TRPC1/GCH1/MOXD1/MYO5A/TPH2",5
GO:0071901,"GO:0071901","negative regulation of protein serine/threonine kinase activity","10/450","101/12302",0.00381520075659555,0.00381520075659555,0.392538334254851,"PRKAR2B/HSPB1/DUSP4/NF1/SFN/DUSP6/SIRT1/PTPN6/KAT2B/HIPK3",10
GO:0021680,"GO:0021680","cerebellar Purkinje cell layer development","4/450","19/12302",0.00442174227655308,0.00442174227655308,0.443570567321588,"KIF14/MYH10/WHRN/AGTPBP1",4
GO:1904251,"GO:1904251","regulation of bile acid metabolic process","3/450","10/12302",0.00481443807118464,0.00481443807118464,0.471184542422486,"FGFR4/SIRT1/STARD4",3
GO:0003208,"GO:0003208","cardiac ventricle morphogenesis","7/450","58/12302",0.00501853129102313,0.00501853129102313,0.473987533214101,"FGFR2/HIF1A/HEY1/TGFBR1/DLL4/SMAD7/DSP",7
GO:0001933,"GO:0001933","negative regulation of protein phosphorylation","22/450","333/12302",0.00548766837699136,0.00548766837699136,0.473987533214101,"PRKAR2B/JUN/HSPB1/TARDBP/RANBP9/DUSP4/DVL1/NF1/SFN/DUSP6/SIRT1/PTPN6/SMAD7/EMILIN1/BTN2A2/UBASH3B/TAF7/KAT2B/TRIB2/CADM4/HIPK3/SMYD3",22
GO:0032370,"GO:0032370","positive regulation of lipid transport","6/450","45/12302",0.00562938302463283,0.00562938302463283,0.473987533214101,"ABCA1/SPP1/ABCA7/SIRT1/EDN1/FABP3",6
GO:1903827,"GO:1903827","regulation of cellular protein localization","26/450","417/12302",0.00569425722697559,0.00569425722697559,0.473987533214101,"GLUL/YWHAZ/GPSM2/YOD1/JUP/GPC1/UBE2J1/ABCA7/NUP54/TARDBP/TP53BP2/DVL1/PPP2R5A/RDX/NF1/SFN/PRKCE/MDM2/LCP1/SREBF2/SPTBN1/RHOG/PAK1/NGFR/NPTN/BBC3",26
GO:0014037,"GO:0014037","Schwann cell differentiation","5/450","32/12302",0.0057006619797862,0.0057006619797862,0.473987533214101,"GPC1/NF1/POU3F2/LAMB2/ERBB3",5
GO:0043312,"GO:0043312","neutrophil degranulation","23/450","355/12302",0.00577791060073539,0.00577791060073539,0.473987533214101,"DYNLT1/HEBP2/UNC13D/AGPAT2/JUP/CYB5R3/STK10/RHOF/RAP1B/ALDH3B1/MMP9/CD55/FABP5/PDXK/GGH/ARL8A/PTPN6/DSP/PPIA/RHOG/TSPAN14/HGSNAT/GM2A",23
GO:0051056,"GO:0051056","regulation of small GTPase mediated signal transduction","18/450","255/12302",0.00593269446423207,0.00593269446423207,0.473987533214101,"ABCA1/DYNLT1/KIF14/SPATA13/SYDE2/ARHGAP28/PLEKHG1/RHOF/ARAP3/VAV2/RDX/NF1/SSX2IP/RASA2/MAPRE2/IQSEC1/RHOG/CADM4",18
GO:0071417,"GO:0071417","cellular response to organonitrogen compound","28/450","461/12302",0.00597573283382271,0.00597573283382271,0.473987533214101,"ATP6V1E2/ADCY3/PRKAR2B/JUP/KLF15/HDAC5/SLC2A8/ADCY9/RAP1B/FOXO3/CA2/GRB14/CREB1/CPEB2/MYO5A/ATP6V1G1/MDM2/SIRT1/IRS4/EDN1/ATP6V0E2/KAT2B/SIK2/ID1/DNMT3A/PAK1/SOCS2/NGFR",28
GO:0042552,"GO:0042552","myelination","10/450","108/12302",0.00613850317717022,0.00613850317717022,0.473987533214101,"KIF14/GPC1/CMTM8/ATRN/CD9/ACER3/NF1/POU3F2/MYO5A/SBF2",10
GO:0048661,"GO:0048661","positive regulation of smooth muscle cell proliferation","8/450","76/12302",0.00644019017406378,0.00644019017406378,0.473987533214101,"FGFR2/JUN/HBEGF/MMP9/MDM2/EDN1/PAK1/ITGA2",8
GO:0031937,"GO:0031937","positive regulation of chromatin silencing","3/450","11/12302",0.0064417303177768,0.0064417303177768,0.473987533214101,"TASOR/SIRT1/MORC2",3
GO:0070542,"GO:0070542","response to fatty acid","7/450","61/12302",0.00663239300605649,0.00663239300605649,0.473987533214101,"SMARCD1/YY1/CREB1/PRKCE/EDN1/FABP3/LDLR",7
GO:1905954,"GO:1905954","positive regulation of lipid localization","7/450","61/12302",0.00663239300605649,0.00663239300605649,0.473987533214101,"ABCA1/SPP1/ABCA7/SIRT1/SREBF2/EDN1/FABP3",7
GO:0007265,"GO:0007265","Ras protein signal transduction","22/450","339/12302",0.00673354928404233,0.00673354928404233,0.473987533214101,"ABCA1/DYNLT1/GPSM2/KIF14/JUN/SPATA13/PLEKHG1/RHOF/RAP1B/CDC42EP4/VAV2/RAB43/RDX/NF1/SSX2IP/RAB32/RASA2/MAPRE2/IQSEC1/RHOG/CADM4/NGFR",22
GO:0007272,"GO:0007272","ensheathment of neurons","10/450","110/12302",0.00697177678856402,0.00697177678856402,0.473987533214101,"KIF14/GPC1/CMTM8/ATRN/CD9/ACER3/NF1/POU3F2/MYO5A/SBF2",10
GO:0008366,"GO:0008366","axon ensheathment","10/450","110/12302",0.00697177678856402,0.00697177678856402,0.473987533214101,"KIF14/GPC1/CMTM8/ATRN/CD9/ACER3/NF1/POU3F2/MYO5A/SBF2",10
GO:2000756,"GO:2000756","regulation of peptidyl-lysine acetylation","6/450","47/12302",0.006980874360459,0.006980874360459,0.473987533214101,"SETD5/BRD7/MUC1/KLF15/SIRT1/TAF7",6
GO:0042060,"GO:0042060","wound healing","26/450","425/12302",0.00723816659482532,0.00723816659482532,0.473987533214101,"YWHAZ/MAFG/PRKAR2B/FGFR2/FN1/HSPB1/P2RX6/CD9/HBEGF/CD151/VAV2/HIF1A/CBX5/MYH10/NF1/TGFBR1/PRKCE/PTPN6/DSP/EDN1/UBASH3B/ERBB3/PRDX2/PAK1/ITGA2/CADM4",26
GO:1904707,"GO:1904707","positive regulation of vascular smooth muscle cell proliferation","5/450","34/12302",0.00742050231525255,0.00742050231525255,0.473987533214101,"JUN/MMP9/MDM2/EDN1/PAK1",5
GO:0034330,"GO:0034330","cell junction organization","17/450","241/12302",0.00742901008554174,0.00742901008554174,0.473987533214101,"ITGB4/CLDN3/CXADR/FN1/JUP/CD9/RAP1B/CD151/WDR1/RDX/TGFBR1/MAPRE2/SMAD7/DSP/IQSEC1/WHRN/ITGA2",17
GO:0021549,"GO:0021549","cerebellum development","8/450","78/12302",0.00751914111168844,0.00751914111168844,0.473987533214101,"KIF14/SDF4/ATRN/CKB/MYH10/WHRN/AGTPBP1/PAK1",8
GO:0014823,"GO:0014823","response to activity","6/450","48/12302",0.00773813936466394,0.00773813936466394,0.473987533214101,"HDAC5/HIF1A/CREB1/EDN1/TPH2/ITGA2",6
GO:0046902,"GO:0046902","regulation of mitochondrial membrane permeability","7/450","63/12302",0.00790409479742328,0.00790409479742328,0.473987533214101,"YWHAZ/DYNLT1/HEBP2/TP53BP2/SFN/THEM4/BBC3",7
GO:0097194,"GO:0097194","execution phase of apoptosis","7/450","63/12302",0.00790409479742328,0.00790409479742328,0.473987533214101,"CASP10/TP53BP2/BNIP1/XKR8/DNASE1L3/ACVR1C/BBC3",7
GO:0070372,"GO:0070372","regulation of ERK1 and ERK2 cascade","16/450","224/12302",0.00824699376957618,0.00824699376957618,0.473987533214101,"FGFR4/FGFR2/FN1/JUN/ABCA7/RANBP9/RAP1B/DUSP4/BRAF/DUSP6/PTPN6/EMILIN1/BTN2A2/PRXL2C/BMPER/NPTN",16
GO:0010561,"GO:0010561","negative regulation of glycoprotein biosynthetic process","3/450","12/12302",0.00835831013729255,0.00835831013729255,0.473987533214101,"ABCA7/HBEGF/AGO2",3
GO:0090382,"GO:0090382","phagosome maturation","5/450","35/12302",0.00840302666781077,0.00840302666781077,0.473987533214101,"ATP6V1E2/RAB43/RAB32/ATP6V1G1/ATP6V0E2",5
GO:1902893,"GO:1902893","regulation of pri-miRNA transcription by RNA polymerase II","5/450","35/12302",0.00840302666781077,0.00840302666781077,0.473987533214101,"JUN/HIF1A/YY1/SREBF2/NGFR",5
GO:0018394,"GO:0018394","peptidyl-lysine acetylation","11/450","131/12302",0.00857287804190012,0.00857287804190012,0.473987533214101,"SETD5/BRD7/JADE2/MUC1/KLF15/BEND3/CREBBP/SIRT1/PHF10/TAF7/KAT2B",11
GO:0032436,"GO:0032436","positive regulation of proteasomal ubiquitin-dependent protein catabolic process","7/450","64/12302",0.0086034180587434,0.0086034180587434,0.473987533214101,"MAPK9/DVL1/MDM2/RNF19B/SMAD7/TRIB2/DNAJB2",7
GO:0048511,"GO:0048511","rhythmic process","17/450","245/12302",0.00869157223568457,0.00869157223568457,0.473987533214101,"GPR157/MAPK9/JUN/TARDBP/FOXO3/CREB1/CREBBP/FBXL3/JUND/SIRT1/RBM4B/THRAP3/KAT2B/ID1/TPH2/ENOX2/NGFR",17
GO:0007623,"GO:0007623","circadian rhythm","13/450","168/12302",0.00875937531232938,0.00875937531232938,0.473987533214101,"GPR157/MAPK9/JUN/TARDBP/CREB1/FBXL3/JUND/SIRT1/RBM4B/THRAP3/ID1/TPH2/NGFR",13
GO:1900739,"GO:1900739","regulation of protein insertion into mitochondrial membrane involved in apoptotic signaling pathway","4/450","23/12302",0.00900154353522255,0.00900154353522255,0.473987533214101,"YWHAZ/TP53BP2/SFN/BBC3",4
GO:1900740,"GO:1900740","positive regulation of protein insertion into mitochondrial membrane involved in apoptotic signaling pathway","4/450","23/12302",0.00900154353522255,0.00900154353522255,0.473987533214101,"YWHAZ/TP53BP2/SFN/BBC3",4
GO:0008544,"GO:0008544","epidermis development","18/450","266/12302",0.0090348956263419,0.0090348956263419,0.473987533214101,"MAFG/AGPAT2/FGFR2/TRADD/JUP/MYCL/CNFN/NF1/FABP5/SFN/POU3F2/MYO5A/DSP/EMP1/WHRN/FOXQ1/MCOLN3/FOSL2",18
GO:0007517,"GO:0007517","muscle organ development","20/450","308/12302",0.0094637253700338,0.0094637253700338,0.473987533214101,"FGFR2/GPC1/HBEGF/FHL3/BTBD1/YY1/NF1/TGFBR1/CREB1/DLL4/PRR14/SGCE/CENPF/SIRT1/SMAD7/DSP/EDN1/GPCPD1/ERBB3/PAK1",20
GO:0001961,"GO:0001961","positive regulation of cytokine-mediated signaling pathway","5/450","36/12302",0.00947208711942371,0.00947208711942371,0.473987533214101,"AGPAT2/ZBP1/HIF1A/TBK1/EDN1",5
GO:0033344,"GO:0033344","cholesterol efflux","5/450","36/12302",0.00947208711942371,0.00947208711942371,0.473987533214101,"ABCA1/ABCG4/ABCA7/SIRT1/SREBF2",5
GO:0010638,"GO:0010638","positive regulation of organelle organization","29/450","500/12302",0.00961735750751217,0.00961735750751217,0.473987533214101,"YWHAZ/MAPK9/GPSM2/BRD7/MUC1/MNS1/TASOR/CDC42EP4/SH3PXD2B/TP53BP2/WDR1/HIF1A/MMP9/KMT2E/CDK9/TGFBR1/SFN/PRKCE/PLK4/SIRT1/LCP1/SREBF2/EDN1/UBE2N/ID1/PFDN2/MORC2/PAK1/BBC3",29
GO:0010256,"GO:0010256","endomembrane system organization","21/450","330/12302",0.00988525046273714,0.00988525046273714,0.473987533214101,"YWHAZ/ABCA1/ATP8B2/TRAPPC8/ABCA7/TARDBP/TBPL1/DNM1/VPS37C/RAB43/MYH10/BNIP1/STX5/TMEM43/MYO18A/XKR8/CREB1/FNBP1L/TMED3/HOOK1/SPTBN1",21
GO:0010634,"GO:0010634","positive regulation of epithelial cell migration","11/450","134/12302",0.0100822037225087,0.0100822037225087,0.473987533214101,"JUN/HSPB1/HBEGF/HIF1A/MMP9/PRKCE/MAPRE2/SIRT1/IQSEC1/EDN1/ITGA2",11
GO:0061564,"GO:0061564","axon development","25/450","416/12302",0.010334439085309,0.010334439085309,0.473987533214101,"DYNLT1/SPP1/EPHB4/ZSWIM6/FGFR2/FN1/JUN/GPC1/DBN1/YTHDF1/EXT1/SEMA4F/RANBP9/DVL1/MYH10/SEMA3F/COBL/CREB1/POU3F2/SH3KBP1/LAMB2/SPTBN1/PAK1/NGFR/NPTN",25
GO:0009108,"GO:0009108","coenzyme biosynthetic process","15/450","210/12302",0.0103410859818221,0.0103410859818221,0.473987533214101,"MTHFS/NUP54/FASN/COQ5/NUP43/HIF1A/PDP1/GCH1/PDXK/PPTC7/COQ10B/PRXL2C/ELOVL7/TECR/COQ10A",15
GO:0010875,"GO:0010875","positive regulation of cholesterol efflux","3/450","13/12302",0.0105745563344472,0.0105745563344472,0.473987533214101,"ABCA1/ABCA7/SIRT1",3
GO:0034111,"GO:0034111","negative regulation of homotypic cell-cell adhesion","3/450","13/12302",0.0105745563344472,0.0105745563344472,0.473987533214101,"CD9/RDX/UBASH3B",3
GO:0034199,"GO:0034199","activation of protein kinase A activity","3/450","13/12302",0.0105745563344472,0.0105745563344472,0.473987533214101,"ADCY3/PRKAR2B/ADCY9",3
GO:0034616,"GO:0034616","response to laminar fluid shear stress","3/450","13/12302",0.0105745563344472,0.0105745563344472,0.473987533214101,"ABCA1/SMAD7/SREBF2",3
GO:2000757,"GO:2000757","negative regulation of peptidyl-lysine acetylation","3/450","13/12302",0.0105745563344472,0.0105745563344472,0.473987533214101,"KLF15/SIRT1/TAF7",3
GO:0071398,"GO:0071398","cellular response to fatty acid","5/450","37/12302",0.0106311474527297,0.0106311474527297,0.473987533214101,"SMARCD1/CREB1/PRKCE/EDN1/LDLR",5
GO:0022037,"GO:0022037","metencephalon development","8/450","83/12302",0.0108085929029627,0.0108085929029627,0.476603309960599,"KIF14/SDF4/ATRN/CKB/MYH10/WHRN/AGTPBP1/PAK1",8
GO:1901655,"GO:1901655","cellular response to ketone","7/450","67/12302",0.0109740824253109,0.0109740824253109,0.478640757497542,"SPP1/ADCY3/FOXO3/PRKCE/SIRT1/FBXO32/SMYD3",7
GO:0007612,"GO:0007612","learning","10/450","118/12302",0.0112102921324287,0.0112102921324287,0.483685722793641,"ADCY3/PRKAR2B/JUN/YTHDF1/HIF1A/NF1/VDAC3/CREB1/MEIS2/NPTN",10
GO:1905269,"GO:1905269","positive regulation of chromatin organization","8/450","84/12302",0.0115771361589817,0.0115771361589817,0.492535883944944,"BRD7/MUC1/TASOR/KMT2E/CDK9/SIRT1/UBE2N/MORC2",8
GO:0030301,"GO:0030301","cholesterol transport","7/450","68/12302",0.011860362405548,0.011860362405548,0.492535883944944,"ABCA1/ABCG4/ABCA7/SIRT1/STARD4/SREBF2/LDLR",7
GO:0046578,"GO:0046578","regulation of Ras protein signal transduction","13/450","175/12302",0.0120860577212303,0.0120860577212303,0.492535883944944,"ABCA1/DYNLT1/KIF14/SPATA13/PLEKHG1/VAV2/RDX/NF1/SSX2IP/RASA2/MAPRE2/IQSEC1/CADM4",13
GO:0010874,"GO:0010874","regulation of cholesterol efflux","4/450","25/12302",0.0121417565095131,0.0121417565095131,0.492535883944944,"ABCA1/ABCA7/SIRT1/SREBF2",4
GO:1901661,"GO:1901661","quinone metabolic process","4/450","25/12302",0.0121417565095131,0.0121417565095131,0.492535883944944,"COQ5/PPTC7/COQ10B/COQ10A",4
GO:1901617,"GO:1901617","organic hydroxy compound biosynthetic process","15/450","214/12302",0.0121518887421359,0.0121518887421359,0.492535883944944,"FGFR4/PLCD1/TRPC1/CYB5R3/FASN/ACER3/GCH1/MOXD1/PDXK/MYO5A/SIRT1/DHDDS/STARD4/SREBF2/TPH2",15
GO:0007409,"GO:0007409","axonogenesis","23/450","380/12302",0.0125543287793578,0.0125543287793578,0.500916601249356,"SPP1/EPHB4/ZSWIM6/FGFR2/FN1/GPC1/DBN1/YTHDF1/EXT1/SEMA4F/RANBP9/DVL1/MYH10/SEMA3F/COBL/CREB1/POU3F2/SH3KBP1/LAMB2/SPTBN1/PAK1/NGFR/NPTN",23
GO:0090559,"GO:0090559","regulation of membrane permeability","7/450","69/12302",0.012797212976398,0.012797212976398,0.500916601249356,"YWHAZ/DYNLT1/HEBP2/TP53BP2/SFN/THEM4/BBC3",7
GO:0032486,"GO:0032486","Rap protein signal transduction","3/450","14/12302",0.0130984856212976,0.0130984856212976,0.500916601249356,"KIF14/RAP1B/RDX",3
GO:0061050,"GO:0061050","regulation of cell growth involved in cardiac muscle cell development","3/450","14/12302",0.0130984856212976,0.0130984856212976,0.500916601249356,"YY1/EDN1/PAK1",3
GO:1903019,"GO:1903019","negative regulation of glycoprotein metabolic process","3/450","14/12302",0.0130984856212976,0.0130984856212976,0.500916601249356,"ABCA7/HBEGF/AGO2",3
GO:0070371,"GO:0070371","ERK1 and ERK2 cascade","16/450","236/12302",0.0131638262504223,0.0131638262504223,0.500916601249356,"FGFR4/FGFR2/FN1/JUN/ABCA7/RANBP9/RAP1B/DUSP4/BRAF/DUSP6/PTPN6/EMILIN1/BTN2A2/PRXL2C/BMPER/NPTN",16
GO:0008542,"GO:0008542","visual learning","5/450","39/12302",0.0132325030812723,0.0132325030812723,0.500916601249356,"HIF1A/NF1/CREB1/MEIS2/NPTN",5
GO:0006732,"GO:0006732","coenzyme metabolic process","20/450","319/12302",0.0135319037809059,0.0135319037809059,0.504301246573215,"MTHFS/AMD1/CYB5R3/NUP54/FASN/COQ5/NUP43/HIF1A/PDP1/GCH1/PDXK/GGH/PPTC7/COQ10B/THEM4/PRXL2C/ELOVL7/TP53I3/TECR/COQ10A",20
GO:1903364,"GO:1903364","positive regulation of cellular protein catabolic process","9/450","104/12302",0.0138506065926434,0.0138506065926434,0.504301246573215,"MAPK9/DVL1/RDX/MDM2/RNF19B/SMAD7/TRIB2/LDLR/DNAJB2",9
GO:0001844,"GO:0001844","protein insertion into mitochondrial membrane involved in apoptotic signaling pathway","4/450","26/12302",0.0139440736897729,0.0139440736897729,0.504301246573215,"YWHAZ/TP53BP2/SFN/BBC3",4
GO:0033762,"GO:0033762","response to glucagon","4/450","26/12302",0.0139440736897729,0.0139440736897729,0.504301246573215,"ADCY3/PRKAR2B/ADCY9/CREB1",4
GO:0016573,"GO:0016573","histone acetylation","10/450","122/12302",0.0139503059945293,0.0139503059945293,0.504301246573215,"SETD5/BRD7/JADE2/MUC1/BEND3/CREBBP/SIRT1/PHF10/TAF7/KAT2B",10
GO:1903829,"GO:1903829","positive regulation of cellular protein localization","17/450","259/12302",0.0145179256832267,0.0145179256832267,0.508561080704202,"YWHAZ/GPSM2/JUP/ABCA7/TARDBP/TP53BP2/RDX/SFN/PRKCE/MDM2/SREBF2/SPTBN1/RHOG/PAK1/NGFR/NPTN/BBC3",17
GO:0031648,"GO:0031648","protein destabilization","5/450","40/12302",0.0146810776011589,0.0146810776011589,0.508561080704202,"CREBBP/FBXL3/MDM2/SIRT1/ID1",5
GO:0055010,"GO:0055010","ventricular cardiac muscle tissue morphogenesis","5/450","40/12302",0.0146810776011589,0.0146810776011589,0.508561080704202,"FGFR2/TGFBR1/DLL4/SMAD7/DSP",5
GO:0019915,"GO:0019915","lipid storage","6/450","55/12302",0.0147718238328075,0.0147718238328075,0.508561080704202,"ABCA1/SIRT1/STARD4/SREBF2/ACVR1C/GM2A",6
GO:0006885,"GO:0006885","regulation of pH","7/450","71/12302",0.0148285845016453,0.0148285845016453,0.508561080704202,"ATP6V1E2/MAFG/SLC9A2/CA2/ATP6V1G1/EDN1/ATP6V0E2",7
GO:0055024,"GO:0055024","regulation of cardiac muscle tissue development","7/450","71/12302",0.0148285845016453,0.0148285845016453,0.508561080704202,"FGFR2/YY1/TGFBR1/CREB1/EDN1/ERBB3/PAK1",7
GO:0018393,"GO:0018393","internal peptidyl-lysine acetylation","10/450","124/12302",0.0154949767569455,0.0154949767569455,0.523677097458276,"SETD5/BRD7/JADE2/MUC1/BEND3/CREBBP/SIRT1/PHF10/TAF7/KAT2B",10
GO:1902895,"GO:1902895","positive regulation of pri-miRNA transcription by RNA polymerase II","4/450","27/12302",0.0159074547596026,0.0159074547596026,0.523677097458276,"JUN/HIF1A/SREBF2/NGFR",4
GO:1901984,"GO:1901984","negative regulation of protein acetylation","3/450","15/12302",0.0159359547890382,0.0159359547890382,0.523677097458276,"KLF15/SIRT1/TAF7",3
GO:0120031,"GO:0120031","plasma membrane bounded cell projection assembly","25/450","432/12302",0.015954469758425,0.015954469758425,0.523677097458276,"DNAAF2/PRKAR2B/SPATA13/CETN2/MNS1/DNALI1/CDC42EP4/KIF3C/VAV2/DZIP1L/MYH10/TUBA1A/RDX/COBL/SSX2IP/TGFBR1/VDAC3/CFAP43/PLK4/EMP1/JHY/FNBP1L/DCDC2/SEPTIN6/RHOG",25
GO:0035065,"GO:0035065","regulation of histone acetylation","5/450","41/12302",0.0162321935240191,0.0162321935240191,0.523677097458276,"SETD5/BRD7/MUC1/SIRT1/TAF7",5
GO:0060760,"GO:0060760","positive regulation of response to cytokine stimulus","5/450","41/12302",0.0162321935240191,0.0162321935240191,0.523677097458276,"AGPAT2/ZBP1/HIF1A/TBK1/EDN1",5
GO:0061614,"GO:0061614","pri-miRNA transcription by RNA polymerase II","5/450","41/12302",0.0162321935240191,0.0162321935240191,0.523677097458276,"JUN/HIF1A/YY1/SREBF2/NGFR",5
GO:0061572,"GO:0061572","actin filament bundle organization","10/450","125/12302",0.0163133933166764,0.0163133933166764,0.523677097458276,"MARCKS/ARHGAP28/RHOF/SH3PXD2B/RDX/TGFBR1/LCP1/RFLNA/ID1/PAK1",10
GO:0043299,"GO:0043299","leukocyte degranulation","23/450","390/12302",0.0166221485729646,0.0166221485729646,0.529353637093909,"DYNLT1/HEBP2/UNC13D/AGPAT2/JUP/CYB5R3/STK10/RHOF/RAP1B/ALDH3B1/MMP9/CD55/FABP5/PDXK/GGH/ARL8A/PTPN6/DSP/PPIA/RHOG/TSPAN14/HGSNAT/GM2A",23
GO:0007264,"GO:0007264","small GTPase mediated signal transduction","25/450","434/12302",0.0168016260714043,0.0168016260714043,0.5308561838723,"ABCA1/DYNLT1/GPSM2/KIF14/JUN/SPATA13/SYDE2/ARHGAP28/PLEKHG1/RHOF/RAP1B/CDC42EP4/ARAP3/VAV2/RAB43/RDX/NF1/SSX2IP/RAB32/RASA2/MAPRE2/IQSEC1/RHOG/CADM4/NGFR",25
GO:0006636,"GO:0006636","unsaturated fatty acid biosynthetic process","5/450","42/12302",0.0178886154805306,0.0178886154805306,0.557008697257008,"FABP5/FADS2/SIRT1/EDN1/ELOVL7",5
GO:0032365,"GO:0032365","intracellular lipid transport","4/450","28/12302",0.0180360037624045,0.0180360037624045,0.557008697257008,"ABCA1/STARD4/FABP3/LDLR",4
GO:0006475,"GO:0006475","internal protein amino acid acetylation","10/450","127/12302",0.0180457959368417,0.0180457959368417,0.557008697257008,"SETD5/BRD7/JADE2/MUC1/BEND3/CREBBP/SIRT1/PHF10/TAF7/KAT2B",10
GO:0030279,"GO:0030279","negative regulation of ossification","6/450","58/12302",0.0188316174997022,0.0188316174997022,0.567338355669702,"HIF1A/TOB1/KREMEN2/RFLNA/RIOX1/ID1",6
GO:0060420,"GO:0060420","regulation of heart growth","6/450","58/12302",0.0188316174997022,0.0188316174997022,0.567338355669702,"FGFR2/YY1/TGFBR1/DUSP6/EDN1/PAK1",6
GO:1901983,"GO:1901983","regulation of protein acetylation","6/450","58/12302",0.0188316174997022,0.0188316174997022,0.567338355669702,"SETD5/BRD7/MUC1/KLF15/SIRT1/TAF7",6
GO:0042401,"GO:0042401","cellular biogenic amine biosynthetic process","3/450","16/12302",0.0190908497323537,0.0190908497323537,0.567338355669702,"AMD1/MOXD1/TPH2",3
GO:1902176,"GO:1902176","negative regulation of oxidative stress-induced intrinsic apoptotic signaling pathway","3/450","16/12302",0.0190908497323537,0.0190908497323537,0.567338355669702,"HSPB1/HIF1A/SIRT1",3
GO:0030031,"GO:0030031","cell projection assembly","25/450","440/12302",0.0195588442161039,0.0195588442161039,0.567338355669702,"DNAAF2/PRKAR2B/SPATA13/CETN2/MNS1/DNALI1/CDC42EP4/KIF3C/VAV2/DZIP1L/MYH10/TUBA1A/RDX/COBL/SSX2IP/TGFBR1/VDAC3/CFAP43/PLK4/EMP1/JHY/FNBP1L/DCDC2/SEPTIN6/RHOG",25
GO:1901800,"GO:1901800","positive regulation of proteasomal protein catabolic process","7/450","75/12302",0.0195622603561596,0.0195622603561596,0.567338355669702,"MAPK9/DVL1/MDM2/RNF19B/SMAD7/TRIB2/DNAJB2",7
GO:2000060,"GO:2000060","positive regulation of ubiquitin-dependent protein catabolic process","7/450","75/12302",0.0195622603561596,0.0195622603561596,0.567338355669702,"MAPK9/DVL1/MDM2/RNF19B/SMAD7/TRIB2/DNAJB2",7
GO:0007632,"GO:0007632","visual behavior","5/450","43/12302",0.0196529459250221,0.0196529459250221,0.567338355669702,"HIF1A/NF1/CREB1/MEIS2/NPTN",5
GO:0051204,"GO:0051204","protein insertion into mitochondrial membrane","4/450","29/12302",0.0203333522158636,0.0203333522158636,0.568381353943097,"YWHAZ/TP53BP2/SFN/BBC3",4
GO:0016202,"GO:0016202","regulation of striated muscle tissue development","9/450","111/12302",0.0204164145840267,0.0204164145840267,0.568381353943097,"FGFR2/GPC1/YY1/TGFBR1/CREB1/CENPF/EDN1/ERBB3/PAK1",9
GO:0048634,"GO:0048634","regulation of muscle organ development","9/450","111/12302",0.0204164145840267,0.0204164145840267,0.568381353943097,"FGFR2/GPC1/YY1/TGFBR1/CREB1/CENPF/EDN1/ERBB3/PAK1",9
GO:0051592,"GO:0051592","response to calcium ion","9/450","111/12302",0.0204164145840267,0.0204164145840267,0.568381353943097,"JUN/TRPC1/SLC25A13/BRAF/JUND/FUS/KCNMB4/EDN1/TPH2",9
GO:0090288,"GO:0090288","negative regulation of cellular response to growth factor stimulus","9/450","111/12302",0.0204164145840267,0.0204164145840267,0.568381353943097,"TGFB1I1/GPC1/TOB1/TGFBR1/SIRT1/SMAD7/EMILIN1/BMPER/CADM4",9
GO:0048738,"GO:0048738","cardiac muscle tissue development","12/450","168/12302",0.0205389641935104,0.0205389641935104,0.568381353943097,"FGFR2/CXADR/MYH10/YY1/TGFBR1/CREB1/DLL4/SMAD7/DSP/EDN1/ERBB3/PAK1",12
GO:0048667,"GO:0048667","cell morphogenesis involved in neuron differentiation","26/450","466/12302",0.0214562940805762,0.0214562940805762,0.572471255674916,"SPP1/EPHB4/ZSWIM6/FGFR2/FN1/GPC1/DBN1/YTHDF1/EXT1/SEMA4F/RANBP9/DVL1/MYH10/SEMA3F/COBL/CREB1/POU3F2/SH3KBP1/LAMB2/WHRN/DCDC2/ID1/SPTBN1/PAK1/NGFR/NPTN",26
GO:0030902,"GO:0030902","hindbrain development","9/450","112/12302",0.0215109463524923,0.0215109463524923,0.572471255674916,"KIF14/SDF4/ATRN/CKB/MYH10/MAFB/WHRN/AGTPBP1/PAK1",9
GO:0045670,"GO:0045670","regulation of osteoclast differentiation","5/450","44/12302",0.0215276196748418,0.0215276196748418,0.572471255674916,"CA2/NF1/CREB1/MAFB/UBASH3B",5
GO:0016569,"GO:0016569","covalent chromatin modification","22/450","378/12302",0.0215990926003478,0.0215990926003478,0.572471255674916,"SETD5/BRD7/JADE2/MUC1/HDAC5/NEK11/BEND3/TASOR/KMT2E/CDK9/CREBBP/CHD1/SIRT1/MTA2/PHF10/UBE2N/TAF7/KAT2B/RIOX1/DNMT3A/MORC2/SMYD3",22
GO:0001666,"GO:0001666","response to hypoxia","17/450","271/12302",0.0216235822245524,0.0216235822245524,0.572471255674916,"CLDN3/SLC2A8/FOXO3/HIF1A/ATP1B1/NF1/CREB1/PRKCE/CREBBP/CPEB2/MDM2/SIRT1/EDN1/EGLN2/DNMT3A/PAK1/ITGA2",17
GO:0051235,"GO:0051235","maintenance of location","16/450","251/12302",0.0222387464899698,0.0222387464899698,0.572471255674916,"ABCA1/GPSM2/TRPC1/JUP/DBN1/PRKCE/MYO5A/SIRT1/PTPN6/VPS13A/STARD4/SREBF2/UBASH3B/MCOLN3/ACVR1C/GM2A",16
GO:0044782,"GO:0044782","cilium organization","18/450","293/12302",0.0222525203966565,0.0222525203966565,0.572471255674916,"TTC21A/DNAAF2/PRKAR2B/CETN2/MNS1/DNALI1/KIF3C/DZIP1L/TUBA1A/SSX2IP/VDAC3/CFAP126/CFAP43/PLK4/JHY/FNBP1L/DCDC2/SEPTIN6",18
GO:0009309,"GO:0009309","amine biosynthetic process","3/450","17/12302",0.0225652620701051,0.0225652620701051,0.572471255674916,"AMD1/MOXD1/TPH2",3
GO:0010878,"GO:0010878","cholesterol storage","3/450","17/12302",0.0225652620701051,0.0225652620701051,0.572471255674916,"ABCA1/STARD4/SREBF2",3
GO:0032366,"GO:0032366","intracellular sterol transport","3/450","17/12302",0.0225652620701051,0.0225652620701051,0.572471255674916,"ABCA1/STARD4/LDLR",3
GO:0032367,"GO:0032367","intracellular cholesterol transport","3/450","17/12302",0.0225652620701051,0.0225652620701051,0.572471255674916,"ABCA1/STARD4/LDLR",3
GO:0071800,"GO:0071800","podosome assembly","3/450","17/12302",0.0225652620701051,0.0225652620701051,0.572471255674916,"MAPK9/SH3PXD2B/LCP1",3
GO:1902254,"GO:1902254","negative regulation of intrinsic apoptotic signaling pathway by p53 class mediator","3/450","17/12302",0.0225652620701051,0.0225652620701051,0.572471255674916,"MUC1/MDM2/SIRT1",3
GO:1901030,"GO:1901030","positive regulation of mitochondrial outer membrane permeabilization involved in apoptotic signaling pathway","4/450","30/12302",0.0228026609066506,0.0228026609066506,0.572471255674916,"YWHAZ/TP53BP2/SFN/BBC3",4
GO:0006914,"GO:0006914","autophagy","23/450","403/12302",0.0233928706028606,0.0233928706028606,0.572471255674916,"ATP6V1E2/ITGB4/YOD1/HSPB1/TRAPPC8/RETREG1/DAPK1/FOXO3/ATG10/HIF1A/TICAM1/VPS37C/TFEB/ATP6V1G1/PACS2/SIRT1/SBF2/VPS13A/SREBF2/TBK1/ATP6V0E2/FBXL2/FNBP1L",23
GO:0061919,"GO:0061919","process utilizing autophagic mechanism","23/450","403/12302",0.0233928706028606,0.0233928706028606,0.572471255674916,"ATP6V1E2/ITGB4/YOD1/HSPB1/TRAPPC8/RETREG1/DAPK1/FOXO3/ATG10/HIF1A/TICAM1/VPS37C/TFEB/ATP6V1G1/PACS2/SIRT1/SBF2/VPS13A/SREBF2/TBK1/ATP6V0E2/FBXL2/FNBP1L",23
GO:0048844,"GO:0048844","artery morphogenesis","6/450","61/12302",0.0235938656046802,0.0235938656046802,0.572471255674916,"HEY1/NF1/TGFBR1/DLL4/SMAD7/LDLR",6
GO:1902117,"GO:1902117","positive regulation of organelle assembly","6/450","61/12302",0.0235938656046802,0.0235938656046802,0.572471255674916,"MAPK9/GPSM2/MNS1/PLK4/LCP1/EDN1",6
GO:0070482,"GO:0070482","response to oxygen levels","18/450","295/12302",0.0236308008454376,0.0236308008454376,0.572471255674916,"CLDN3/SLC2A8/FOXO3/HIF1A/ATP1B1/NF1/CREB1/PRKCE/CREBBP/CPEB2/ATP6V1G1/MDM2/SIRT1/EDN1/EGLN2/DNMT3A/PAK1/ITGA2",18
GO:2001243,"GO:2001243","negative regulation of intrinsic apoptotic signaling pathway","7/450","78/12302",0.0237423751612159,0.0237423751612159,0.572471255674916,"IVNS1ABP/HSPB1/MUC1/HIF1A/MMP9/MDM2/SIRT1",7
GO:1902115,"GO:1902115","regulation of organelle assembly","11/450","152/12302",0.0238017172299065,0.0238017172299065,0.572471255674916,"MAPK9/GPSM2/ATXN2L/MNS1/RDX/VDAC3/PLK4/LCP1/EDN1/KAT2B/DCDC2",11
GO:1901861,"GO:1901861","regulation of muscle tissue development","9/450","114/12302",0.0238254367032595,0.0238254367032595,0.572471255674916,"FGFR2/GPC1/YY1/TGFBR1/CREB1/CENPF/EDN1/ERBB3/PAK1",9
GO:0031400,"GO:0031400","negative regulation of protein modification process","26/450","472/12302",0.024697739059598,0.024697739059598,0.589898379042528,"IVNS1ABP/PRKAR2B/JUN/HSPB1/KLF15/TARDBP/RANBP9/DUSP4/DVL1/NF1/SFN/PRKCE/DUSP6/SIRT1/PTPN6/SMAD7/SNTA1/EMILIN1/BTN2A2/UBASH3B/TAF7/KAT2B/TRIB2/CADM4/HIPK3/SMYD3",26
GO:0015918,"GO:0015918","sterol transport","7/450","79/12302",0.0252624738768145,0.0252624738768145,0.593650740724964,"ABCA1/ABCG4/ABCA7/SIRT1/STARD4/SREBF2/LDLR",7
GO:0008306,"GO:0008306","associative learning","6/450","62/12302",0.0253452499358445,0.0253452499358445,0.593650740724964,"ADCY3/HIF1A/NF1/CREB1/MEIS2/NPTN",6
GO:0014002,"GO:0014002","astrocyte development","4/450","31/12302",0.0254466240908865,0.0254466240908865,0.593650740724964,"NF1/POU3F2/LAMB2/LDLR",4
GO:0034405,"GO:0034405","response to fluid shear stress","4/450","31/12302",0.0254466240908865,0.0254466240908865,0.593650740724964,"ABCA1/CA2/SMAD7/SREBF2",4
GO:0003229,"GO:0003229","ventricular cardiac muscle tissue development","5/450","46/12302",0.0256168710286073,0.0256168710286073,0.594168009498334,"FGFR2/TGFBR1/DLL4/SMAD7/DSP",5
GO:0032373,"GO:0032373","positive regulation of sterol transport","3/450","18/12302",0.0263596540675172,0.0263596540675172,0.600974888190045,"ABCA1/ABCA7/SIRT1",3
GO:0032376,"GO:0032376","positive regulation of cholesterol transport","3/450","18/12302",0.0263596540675172,0.0263596540675172,0.600974888190045,"ABCA1/ABCA7/SIRT1",3
GO:0045671,"GO:0045671","negative regulation of osteoclast differentiation","3/450","18/12302",0.0263596540675172,0.0263596540675172,0.600974888190045,"NF1/MAFB/UBASH3B",3
GO:0050878,"GO:0050878","regulation of body fluid levels","21/450","364/12302",0.0265648638407939,0.0265648638407939,0.602231703604557,"YWHAZ/MAFG/ADCY3/PRKAR2B/HSPB1/P2RX6/ADCY9/CD9/VAV2/HIF1A/CBX5/CREB1/SFN/PRKCE/PTPN6/EDN1/UBASH3B/JHY/PRDX2/ITGA2/SOCS2",21
GO:0006473,"GO:0006473","protein acetylation","11/450","155/12302",0.0270062657073255,0.0270062657073255,0.608798846104819,"SETD5/BRD7/JADE2/MUC1/KLF15/BEND3/CREBBP/SIRT1/PHF10/TAF7/KAT2B",11
GO:0007507,"GO:0007507","heart development","25/450","454/12302",0.0273757882160557,0.0273757882160557,0.613681297733634,"EPHB4/TCF25/FGFR2/CXADR/JUN/SH3PXD2B/DVL1/HIF1A/MYH10/YY1/HEY1/NF1/TGFBR1/CREB1/DLL4/DUSP6/MDM2/SMAD7/DSP/EMILIN1/EDN1/KAT2B/ID1/ERBB3/PAK1",25
GO:0010038,"GO:0010038","response to metal ion","17/450","279/12302",0.0276626044106682,0.0276626044106682,0.616665777856534,"MAPK9/JUN/TRPC1/CA2/SLC25A13/HIF1A/MMP9/BRAF/CREB1/JUND/GGH/MDM2/FUS/KCNMB4/EDN1/DNMT3A/TPH2",17
GO:1903749,"GO:1903749","positive regulation of establishment of protein localization to mitochondrion","5/450","47/12302",0.0278354420605298,0.0278354420605298,0.617090463127302,"YWHAZ/TP53BP2/SFN/SREBF2/BBC3",5
GO:0043542,"GO:0043542","endothelial cell migration","13/450","196/12302",0.0280361727675578,0.0280361727675578,0.618125451647948,"GLUL/EPHB4/JUP/HSPB1/HDAC5/HIF1A/NF1/TGFBR1/DLL4/SIRT1/EDN1/ID1/BMPER",13
GO:0071548,"GO:0071548","response to dexamethasone","4/450","32/12302",0.0282674758210436,0.0282674758210436,0.619819487085524,"FOXO3/EDN1/FBXO32/SMYD3",4
GO:0030004,"GO:0030004","cellular monovalent inorganic cation homeostasis","7/450","81/12302",0.0284997305900688,0.0284997305900688,0.62069529125283,"ATP6V1E2/MAFG/SLC9A2/CA2/ATP1B1/ATP6V1G1/ATP6V0E2",7
GO:0030641,"GO:0030641","regulation of cellular pH","6/450","64/12302",0.0291029964800436,0.0291029964800436,0.62069529125283,"ATP6V1E2/MAFG/SLC9A2/CA2/ATP6V1G1/ATP6V0E2",6
GO:0097306,"GO:0097306","cellular response to alcohol","6/450","64/12302",0.0291029964800436,0.0291029964800436,0.62069529125283,"ABCA1/ADCY3/JUP/FOXO3/PRKCE/DNMT3A",6
GO:0007179,"GO:0007179","transforming growth factor beta receptor signaling pathway","11/450","157/12302",0.0293087478778736,0.0293087478778736,0.62069529125283,"TGFB1I1/JUN/TGFBR1/CREB1/CREBBP/SIRT1/SMAD7/AMHR2/EMILIN1/ACVR1C/ID1",11
GO:0036293,"GO:0036293","response to decreased oxygen levels","17/450","281/12302",0.0293526044452299,0.0293526044452299,0.62069529125283,"CLDN3/SLC2A8/FOXO3/HIF1A/ATP1B1/NF1/CREB1/PRKCE/CREBBP/CPEB2/MDM2/SIRT1/EDN1/EGLN2/DNMT3A/PAK1/ITGA2",17
GO:0007611,"GO:0007611","learning or memory","13/450","198/12302",0.030113860761209,0.030113860761209,0.62069529125283,"ADCY3/PRKAR2B/JUN/YTHDF1/ABCA7/HIF1A/NF1/VDAC3/CREB1/MEIS2/LDLR/GM2A/NPTN",13
GO:0071560,"GO:0071560","cellular response to transforming growth factor beta stimulus","13/450","198/12302",0.030113860761209,0.030113860761209,0.62069529125283,"TGFB1I1/FGFR2/JUN/TGFBR1/CREB1/CREBBP/SIRT1/SMAD7/AMHR2/EMILIN1/EDN1/ACVR1C/ID1",13
GO:0055081,"GO:0055081","anion homeostasis","5/450","48/12302",0.0301723377228398,0.0301723377228398,0.62069529125283,"ABCA1/FGFR4/CKB/SIRT1/FABP3",5
GO:0060840,"GO:0060840","artery development","7/450","82/12302",0.0302190496312528,0.0302190496312528,0.62069529125283,"MYH10/HEY1/NF1/TGFBR1/DLL4/SMAD7/LDLR",7
GO:0006271,"GO:0006271","DNA strand elongation involved in DNA replication","3/450","19/12302",0.030473012528323,0.030473012528323,0.62069529125283,"POLD2/LIG1/RFC3",3
GO:0034694,"GO:0034694","response to prostaglandin","3/450","19/12302",0.030473012528323,0.030473012528323,0.62069529125283,"YY1/PRKCE/EDN1",3
GO:0043921,"GO:0043921","modulation by host of viral transcription","3/450","19/12302",0.030473012528323,0.030473012528323,0.62069529125283,"JUN/TARDBP/CHD1",3
GO:0045332,"GO:0045332","phospholipid translocation","3/450","19/12302",0.030473012528323,0.030473012528323,0.62069529125283,"ABCA1/ATP8B2/ABCA7",3
GO:0052472,"GO:0052472","modulation by host of symbiont transcription","3/450","19/12302",0.030473012528323,0.030473012528323,0.62069529125283,"JUN/TARDBP/CHD1",3
GO:0042632,"GO:0042632","cholesterol homeostasis","6/450","65/12302",0.0311120654364269,0.0311120654364269,0.621242648661126,"ABCA1/FGFR4/SIRT1/SREBF2/FABP3/LDLR",6
GO:0045124,"GO:0045124","regulation of bone resorption","4/450","33/12302",0.0312669981419163,0.0312669981419163,0.621242648661126,"SPP1/CA2/NF1/UBASH3B",4
GO:1900271,"GO:1900271","regulation of long-term synaptic potentiation","4/450","33/12302",0.0312669981419163,0.0312669981419163,0.621242648661126,"YTHDF1/NF1/CREB1/NPTN",4
GO:0060485,"GO:0060485","mesenchyme development","14/450","220/12302",0.0315432592334254,0.0315432592334254,0.621242648661126,"TGFB1I1/HNRNPAB/FGFR2/FN1/SEMA4F/HIF1A/SEMA3F/HEY1/TGFBR1/MCRIP1/MDM2/SMAD7/EDN1/ERBB3",14
GO:1905477,"GO:1905477","positive regulation of protein localization to membrane","8/450","101/12302",0.0315651919521217,0.0315651919521217,0.621242648661126,"YWHAZ/TP53BP2/SFN/PRKCE/SPTBN1/RHOG/PAK1/BBC3",8
GO:0001578,"GO:0001578","microtubule bundle formation","6/450","66/12302",0.0332095862928062,0.0332095862928062,0.621242648661126,"DNAAF2/DNALI1/TPPP/CFAP43/TPPP3/JHY",6
GO:0055092,"GO:0055092","sterol homeostasis","6/450","66/12302",0.0332095862928062,0.0332095862928062,0.621242648661126,"ABCA1/FGFR4/SIRT1/SREBF2/FABP3/LDLR",6
GO:0097035,"GO:0097035","regulation of membrane lipid distribution","4/450","34/12302",0.0344465309188048,0.0344465309188048,0.621242648661126,"ABCA1/ATP8B2/ABCA7/XKR8",4
GO:0030335,"GO:0030335","positive regulation of cell migration","23/450","419/12302",0.0344497516174897,0.0344497516174897,0.621242648661126,"FN1/JUN/TRADD/HSPB1/CAMK1D/HBEGF/SEMA4F/CD151/HIF1A/MMP9/LAMB1/SEMA3F/RDX/TGFBR1/PRKCE/MDM2/MAPRE2/SIRT1/IQSEC1/EDN1/AGO2/PAK1/ITGA2",23
GO:0071559,"GO:0071559","response to transforming growth factor beta","13/450","202/12302",0.0346014206084886,0.0346014206084886,0.621242648661126,"TGFB1I1/FGFR2/JUN/TGFBR1/CREB1/CREBBP/SIRT1/SMAD7/AMHR2/EMILIN1/EDN1/ACVR1C/ID1",13
GO:0006760,"GO:0006760","folic acid-containing compound metabolic process","3/450","20/12302",0.0349029922904037,0.0349029922904037,0.621242648661126,"MTHFS/GCH1/GGH",3
GO:0034204,"GO:0034204","lipid translocation","3/450","20/12302",0.0349029922904037,0.0349029922904037,0.621242648661126,"ABCA1/ATP8B2/ABCA7",3
GO:0043496,"GO:0043496","regulation of protein homodimerization activity","3/450","20/12302",0.0349029922904037,0.0349029922904037,0.621242648661126,"TRAF4/TICAM1/ID1",3
GO:0052312,"GO:0052312","modulation of transcription in other organism involved in symbiotic interaction","3/450","20/12302",0.0349029922904037,0.0349029922904037,0.621242648661126,"JUN/TARDBP/CHD1",3
GO:0060390,"GO:0060390","regulation of SMAD protein signal transduction","3/450","20/12302",0.0349029922904037,0.0349029922904037,0.621242648661126,"TOB1/TGFBR1/SPTBN1",3
GO:0071377,"GO:0071377","cellular response to glucagon stimulus","3/450","20/12302",0.0349029922904037,0.0349029922904037,0.621242648661126,"ADCY3/PRKAR2B/ADCY9",3
GO:0045913,"GO:0045913","positive regulation of carbohydrate metabolic process","6/450","67/12302",0.0353966850338713,0.0353966850338713,0.621242648661126,"HIF1A/PRKCE/SIRT1/KAT2B/PRXL2C/DYRK2",6
GO:0045936,"GO:0045936","negative regulation of phosphate metabolic process","24/450","443/12302",0.0355871862144154,0.0355871862144154,0.621242648661126,"MIDN/PRKAR2B/JUN/HSPB1/TARDBP/RANBP9/DUSP4/DVL1/PPP2R5A/NF1/SFN/DUSP6/SIRT1/PTPN6/SMAD7/EMILIN1/BTN2A2/UBASH3B/TAF7/KAT2B/TRIB2/CADM4/HIPK3/SMYD3",24
GO:0010563,"GO:0010563","negative regulation of phosphorus metabolic process","24/450","444/12302",0.036387225774105,0.036387225774105,0.621242648661126,"MIDN/PRKAR2B/JUN/HSPB1/TARDBP/RANBP9/DUSP4/DVL1/PPP2R5A/NF1/SFN/DUSP6/SIRT1/PTPN6/SMAD7/EMILIN1/BTN2A2/UBASH3B/TAF7/KAT2B/TRIB2/CADM4/HIPK3/SMYD3",24
GO:0051017,"GO:0051017","actin filament bundle assembly","9/450","123/12302",0.0364548158215016,0.0364548158215016,0.621242648661126,"MARCKS/ARHGAP28/RHOF/SH3PXD2B/RDX/TGFBR1/LCP1/ID1/PAK1",9
GO:0008016,"GO:0008016","regulation of heart contraction","12/450","183/12302",0.0365817683124857,0.0365817683124857,0.621242648661126,"CXADR/TRPC1/JUP/HBEGF/ATP1B1/GCH1/MDM2/FXYD2/SMAD7/DSP/SNTA1/EDN1",12
GO:0048762,"GO:0048762","mesenchymal cell differentiation","12/450","183/12302",0.0365817683124857,0.0365817683124857,0.621242648661126,"TGFB1I1/HNRNPAB/FGFR2/FN1/SEMA4F/HIF1A/SEMA3F/HEY1/TGFBR1/MCRIP1/SMAD7/EDN1",12
GO:0003231,"GO:0003231","cardiac ventricle development","8/450","104/12302",0.0366552786529527,0.0366552786529527,0.621242648661126,"FGFR2/HIF1A/HEY1/TGFBR1/DLL4/MDM2/SMAD7/DSP",8
GO:0051291,"GO:0051291","protein heterooligomerization","8/450","104/12302",0.0366552786529527,0.0366552786529527,0.621242648661126,"CLDN3/TRADD/JUP/P2RX6/NUP54/TMEM120A/GCH1/SEPTIN11",8
GO:0045732,"GO:0045732","positive regulation of protein catabolic process","11/450","163/12302",0.0370558828282077,0.0370558828282077,0.621242648661126,"MAPK9/DVL1/RDX/STX5/MDM2/RNF19B/SMAD7/EGLN2/TRIB2/LDLR/DNAJB2",11
GO:0008361,"GO:0008361","regulation of cell size","10/450","143/12302",0.037078918379513,0.037078918379513,0.621242648661126,"SPP1/FN1/DBN1/SEMA4F/VAV2/SEMA3F/RDX/CREB1/EDN1/PAK1",10
GO:1901796,"GO:1901796","regulation of signal transduction by p53 class mediator","10/450","143/12302",0.037078918379513,0.037078918379513,0.621242648661126,"BRD7/MUC1/RFC3/TP53BP2/MDM2/SIRT1/MTA2/TAF13/TAF7/DYRK2",10
GO:0050890,"GO:0050890","cognition","14/450","225/12302",0.0370890345274899,0.0370890345274899,0.621242648661126,"ADCY3/PRKAR2B/JUN/YTHDF1/ABCA7/SOBP/HIF1A/NF1/VDAC3/CREB1/MEIS2/LDLR/GM2A/NPTN",14
GO:0048638,"GO:0048638","regulation of developmental growth","16/450","268/12302",0.0375293170600413,0.0375293170600413,0.621242648661126,"SPP1/FGFR2/FN1/DBN1/ATRN/SEMA4F/SH3PXD2B/SEMA3F/YY1/TGFBR1/CREB1/DUSP6/POU3F2/EDN1/PAK1/SOCS2",16
GO:0032368,"GO:0032368","regulation of lipid transport","7/450","86/12302",0.0377904810947116,0.0377904810947116,0.621242648661126,"ABCA1/SPP1/ABCA7/SIRT1/SREBF2/EDN1/FABP3",7
GO:1903052,"GO:1903052","positive regulation of proteolysis involved in cellular protein catabolic process","7/450","86/12302",0.0377904810947116,0.0377904810947116,0.621242648661126,"MAPK9/DVL1/MDM2/RNF19B/SMAD7/TRIB2/DNAJB2",7
GO:1901028,"GO:1901028","regulation of mitochondrial outer membrane permeabilization involved in apoptotic signaling pathway","4/450","35/12302",0.0378069830802233,0.0378069830802233,0.621242648661126,"YWHAZ/TP53BP2/SFN/BBC3",4
GO:0006305,"GO:0006305","DNA alkylation","5/450","51/12302",0.0379074692193433,0.0379074692193433,0.621242648661126,"BEND3/KMT2E/STPG4/MTA2/DNMT3A",5
GO:0006306,"GO:0006306","DNA methylation","5/450","51/12302",0.0379074692193433,0.0379074692193433,0.621242648661126,"BEND3/KMT2E/STPG4/MTA2/DNMT3A",5
GO:0046394,"GO:0046394","carboxylic acid biosynthetic process","20/450","356/12302",0.037966611449077,0.037966611449077,0.621242648661126,"GLUL/FGFR4/MTHFS/NUP54/FASN/NUP43/HIF1A/HOGA1/FABP5/GCH1/VCAN/MYO5A/FADS2/SIRT1/NANP/STARD4/EDN1/PRXL2C/ELOVL7/TECR",20
GO:0072330,"GO:0072330","monocarboxylic acid biosynthetic process","16/450","269/12302",0.0386198915514338,0.0386198915514338,0.621242648661126,"FGFR4/NUP54/FASN/NUP43/HIF1A/HOGA1/FABP5/VCAN/MYO5A/FADS2/SIRT1/STARD4/EDN1/PRXL2C/ELOVL7/TECR",16
GO:0016053,"GO:0016053","organic acid biosynthetic process","20/450","357/12302",0.0389119663971111,0.0389119663971111,0.621242648661126,"GLUL/FGFR4/MTHFS/NUP54/FASN/NUP43/HIF1A/HOGA1/FABP5/GCH1/VCAN/MYO5A/FADS2/SIRT1/NANP/STARD4/EDN1/PRXL2C/ELOVL7/TECR",20
GO:0003298,"GO:0003298","physiological muscle hypertrophy","3/450","21/12302",0.0396460499252647,0.0396460499252647,0.621242648661126,"YY1/EDN1/PAK1",3
GO:0003301,"GO:0003301","physiological cardiac muscle hypertrophy","3/450","21/12302",0.0396460499252647,0.0396460499252647,0.621242648661126,"YY1/EDN1/PAK1",3
GO:0006297,"GO:0006297","nucleotide-excision repair, DNA gap filling","3/450","21/12302",0.0396460499252647,0.0396460499252647,0.621242648661126,"POLD2/LIG1/RFC3",3
GO:0030947,"GO:0030947","regulation of vascular endothelial growth factor receptor signaling pathway","3/450","21/12302",0.0396460499252647,0.0396460499252647,0.621242648661126,"HIF1A/EMILIN1/CADM4",3
GO:0034110,"GO:0034110","regulation of homotypic cell-cell adhesion","3/450","21/12302",0.0396460499252647,0.0396460499252647,0.621242648661126,"CD9/RDX/UBASH3B",3
GO:0061049,"GO:0061049","cell growth involved in cardiac muscle cell development","3/450","21/12302",0.0396460499252647,0.0396460499252647,0.621242648661126,"YY1/EDN1/PAK1",3
GO:0070168,"GO:0070168","negative regulation of biomineral tissue development","3/450","21/12302",0.0396460499252647,0.0396460499252647,0.621242648661126,"HIF1A/HEY1/RFLNA",3
GO:0090383,"GO:0090383","phagosome acidification","3/450","21/12302",0.0396460499252647,0.0396460499252647,0.621242648661126,"ATP6V1E2/ATP6V1G1/ATP6V0E2",3
GO:1900027,"GO:1900027","regulation of ruffle assembly","3/450","21/12302",0.0396460499252647,0.0396460499252647,0.621242648661126,"RDX/COBL/RHOG",3
GO:0043534,"GO:0043534","blood vessel endothelial cell migration","9/450","125/12302",0.0397851150149139,0.0397851150149139,0.621242648661126,"EPHB4/JUP/HSPB1/HDAC5/HIF1A/NF1/DLL4/SIRT1/ID1",9
GO:0007589,"GO:0007589","body fluid secretion","6/450","69/12302",0.0400436489799813,0.0400436489799813,0.621242648661126,"HIF1A/CREB1/PRKCE/EDN1/JHY/SOCS2",6
GO:0030705,"GO:0030705","cytoskeleton-dependent intracellular transport","10/450","145/12302",0.0401754743154319,0.0401754743154319,0.621242648661126,"TTC21A/HSPB1/KIF3C/HIF1A/TUBA1A/SSX2IP/MYO5A/ARL8A/FNBP1L/HOOK1",10
GO:0003206,"GO:0003206","cardiac chamber morphogenesis","8/450","106/12302",0.0403396662828692,0.0403396662828692,0.621242648661126,"FGFR2/HIF1A/HEY1/TGFBR1/DLL4/MDM2/SMAD7/DSP",8
GO:0035794,"GO:0035794","positive regulation of mitochondrial membrane permeability","5/450","52/12302",0.040731236567714,0.040731236567714,0.621242648661126,"YWHAZ/HEBP2/TP53BP2/SFN/BBC3",5
GO:0055008,"GO:0055008","cardiac muscle tissue morphogenesis","5/450","52/12302",0.040731236567714,0.040731236567714,0.621242648661126,"FGFR2/TGFBR1/DLL4/SMAD7/DSP",5
GO:1905710,"GO:1905710","positive regulation of membrane permeability","5/450","52/12302",0.040731236567714,0.040731236567714,0.621242648661126,"YWHAZ/HEBP2/TP53BP2/SFN/BBC3",5
GO:0007411,"GO:0007411","axon guidance","14/450","228/12302",0.0407347638710881,0.0407347638710881,0.621242648661126,"EPHB4/ZSWIM6/GPC1/YTHDF1/EXT1/SEMA4F/RANBP9/DVL1/MYH10/SEMA3F/SH3KBP1/LAMB2/SPTBN1/NPTN",14
GO:0042181,"GO:0042181","ketone biosynthetic process","4/450","36/12302",0.0413488450753233,0.0413488450753233,0.621242648661126,"COQ5/PPTC7/COQ10B/COQ10A",4
GO:0032787,"GO:0032787","monocarboxylic acid metabolic process","26/450","496/12302",0.041583926590191,0.041583926590191,0.621242648661126,"FGFR4/MTHFS/PRKAR2B/NDUFS6/NUP54/FASN/NUP43/HIF1A/HOGA1/AIG1/PDP1/FABP5/PRKCE/VCAN/MYO5A/FADS2/SIRT1/SLC16A3/STARD4/THEM4/EDN1/FABP3/PRXL2C/ELOVL7/TECR/MORC2",26
GO:0097485,"GO:0097485","neuron projection guidance","14/450","229/12302",0.0420047369363216,0.0420047369363216,0.621242648661126,"EPHB4/ZSWIM6/GPC1/YTHDF1/EXT1/SEMA4F/RANBP9/DVL1/MYH10/SEMA3F/SH3KBP1/LAMB2/SPTBN1/NPTN",14
GO:0090101,"GO:0090101","negative regulation of transmembrane receptor protein serine/threonine kinase signaling pathway","7/450","88/12302",0.0420047596600644,0.0420047596600644,0.621242648661126,"TGFB1I1/TOB1/TGFBR1/SIRT1/SMAD7/EMILIN1/BMPER",7
GO:0007030,"GO:0007030","Golgi organization","8/450","107/12302",0.0422711222283454,0.0422711222283454,0.621242648661126,"YWHAZ/ATP8B2/TRAPPC8/RAB43/STX5/MYO18A/TMED3/HOOK1",8
GO:0097190,"GO:0097190","apoptotic signaling pathway","25/450","475/12302",0.0433377432648452,0.0433377432648452,0.621242648661126,"YWHAZ/MAPK9/IVNS1ABP/JUN/TRADD/HSPB1/MUC1/DAPK1/PELI3/FOXO3/CASP10/TP53BP2/HIF1A/TICAM1/MMP9/NF1/TGFBR1/SFN/MDM2/SIRT1/SIVA1/ERBB3/PRDX2/DYRK2/BBC3",25
GO:0043062,"GO:0043062","extracellular structure organization","18/450","317/12302",0.0433859247035612,0.0433859247035612,0.621242648661126,"ABCA1/SPP1/FGFR4/ITGB4/FN1/ABCA7/SH3PXD2B/MPZL3/P3H4/MMP9/LAMB1/NF1/TGFBR1/VCAN/LCP1/LAMB2/EMILIN1/ITGA2",18
GO:0046626,"GO:0046626","regulation of insulin receptor signaling pathway","5/450","53/12302",0.0436791920515079,0.0436791920515079,0.621242648661126,"GRB14/SIRT1/SIK2/PAK1/SOCS2",5
GO:1902108,"GO:1902108","regulation of mitochondrial membrane permeability involved in apoptotic process","5/450","53/12302",0.0436791920515079,0.0436791920515079,0.621242648661126,"YWHAZ/TP53BP2/SFN/THEM4/BBC3",5
GO:0032963,"GO:0032963","collagen metabolic process","7/450","89/12302",0.044221671056066,0.044221671056066,0.621242648661126,"PHYKPL/HIF1A/P3H4/MMP9/EMILIN1/ID1/ITGA2",7
GO:0030198,"GO:0030198","extracellular matrix organization","16/450","274/12302",0.0444183567210312,0.0444183567210312,0.621242648661126,"SPP1/FGFR4/ITGB4/FN1/SH3PXD2B/MPZL3/P3H4/MMP9/LAMB1/NF1/TGFBR1/VCAN/LCP1/LAMB2/EMILIN1/ITGA2",16
GO:0045862,"GO:0045862","positive regulation of proteolysis","16/450","274/12302",0.0444183567210312,0.0444183567210312,0.621242648661126,"MAPK9/FGFR4/FN1/TRADD/DAPK1/CASP10/DVL1/MDM2/SIRT1/RNF19B/SMAD7/ACVR1C/TRIB2/DNAJB2/NGFR/BBC3",16
GO:0007015,"GO:0007015","actin filament organization","18/450","318/12302",0.0445031247870523,0.0445031247870523,0.621242648661126,"MARCKS/DBN1/ARHGAP28/RHOF/CDC42EP4/SH3PXD2B/WDR1/RDX/COBL/TGFBR1/PRKCE/SH3KBP1/LCP1/RFLNA/ID1/SPTBN1/RHOG/PAK1",18
GO:0043543,"GO:0043543","protein acylation","12/450","189/12302",0.0449854138618297,0.0449854138618297,0.621242648661126,"GLUL/SETD5/BRD7/JADE2/MUC1/KLF15/BEND3/CREBBP/SIRT1/PHF10/TAF7/KAT2B",12
GO:0043506,"GO:0043506","regulation of JUN kinase activity","6/450","71/12302",0.0450600643639066,0.0450600643639066,0.621242648661126,"MAP4K2/MAP3K21/EDN1/MAP3K2/PAK1/HIPK3",6
GO:0021695,"GO:0021695","cerebellar cortex development","4/450","37/12302",0.0450722023629104,0.0450722023629104,0.621242648661126,"KIF14/MYH10/WHRN/AGTPBP1",4
GO:0061647,"GO:0061647","histone H3-K9 modification","4/450","37/12302",0.0450722023629104,0.0450722023629104,0.621242648661126,"SETD5/BEND3/SIRT1/KAT2B",4
GO:1902667,"GO:1902667","regulation of axon guidance","4/450","37/12302",0.0450722023629104,0.0450722023629104,0.621242648661126,"ZSWIM6/YTHDF1/SEMA4F/SEMA3F",4
GO:0001525,"GO:0001525","angiogenesis","23/450","432/12302",0.0460063637047686,0.0460063637047686,0.621242648661126,"GLUL/EPHB4/FGFR2/PLCD1/FN1/JUN/JUP/HSPB1/HDAC5/PAK4/VAV2/HIF1A/HEY1/NF1/TGFBR1/DLL4/SIRT1/EMILIN1/EDN1/AGO2/ID1/BMPER/NGFR",23
GO:0097305,"GO:0097305","response to alcohol","11/450","169/12302",0.0461360351297819,0.0461360351297819,0.621242648661126,"ABCA1/SDF4/ADCY3/FGFR2/CLDN3/JUP/FOXO3/TGFBR1/PRKCE/GGH/DNMT3A",11
GO:0090287,"GO:0090287","regulation of cellular response to growth factor stimulus","13/450","211/12302",0.0464154423653968,0.0464154423653968,0.621242648661126,"TGFB1I1/GPC1/ZNF423/HIF1A/TOB1/TGFBR1/CREBBP/SIRT1/SMAD7/EMILIN1/BMPER/CADM4/NPTN",13
GO:0045637,"GO:0045637","regulation of myeloid cell differentiation","12/450","190/12302",0.0465058279119366,0.0465058279119366,0.621242648661126,"JUN/FOXO3/CA2/HIF1A/KMT2E/NF1/CREB1/CREBBP/MAFB/MEIS2/UBASH3B/KAT2B",12
GO:0010324,"GO:0010324","membrane invagination","5/450","54/12302",0.046751956552279,0.046751956552279,0.621242648661126,"ABCA1/ABCA7/XKR8/FNBP1L/ITGA2",5
GO:0055021,"GO:0055021","regulation of cardiac muscle tissue growth","5/450","54/12302",0.046751956552279,0.046751956552279,0.621242648661126,"FGFR2/YY1/TGFBR1/EDN1/PAK1",5
GO:1904705,"GO:1904705","regulation of vascular smooth muscle cell proliferation","5/450","54/12302",0.046751956552279,0.046751956552279,0.621242648661126,"JUN/MMP9/MDM2/EDN1/PAK1",5
GO:1990874,"GO:1990874","vascular smooth muscle cell proliferation","5/450","54/12302",0.046751956552279,0.046751956552279,0.621242648661126,"JUN/MMP9/MDM2/EDN1/PAK1",5
GO:0050770,"GO:0050770","regulation of axonogenesis","10/450","149/12302",0.0468916349593057,0.0468916349593057,0.621242648661126,"SPP1/ZSWIM6/FN1/DBN1/YTHDF1/SEMA4F/SEMA3F/POU3F2/PAK1/NGFR",10
GO:1902275,"GO:1902275","regulation of chromatin organization","10/450","149/12302",0.0468916349593057,0.0468916349593057,0.621242648661126,"SETD5/BRD7/MUC1/TASOR/KMT2E/CDK9/SIRT1/UBE2N/TAF7/MORC2",10
GO:1905475,"GO:1905475","regulation of protein localization to membrane","10/450","149/12302",0.0468916349593057,0.0468916349593057,0.621242648661126,"YWHAZ/GPC1/TP53BP2/PPP2R5A/SFN/PRKCE/SPTBN1/RHOG/PAK1/BBC3",10
GO:0001890,"GO:0001890","placenta development","9/450","129/12302",0.0470516113711613,0.0470516113711613,0.621242648661126,"SPP1/FGFR2/PLCD1/ETNK2/HIF1A/HEY1/TFEB/PLK4/PLAC1",9
GO:0001892,"GO:0001892","embryonic placenta development","6/450","72/12302",0.047708613528373,0.047708613528373,0.621242648661126,"FGFR2/PLCD1/HIF1A/HEY1/TFEB/PLK4",6
GO:0071453,"GO:0071453","cellular response to oxygen levels","11/450","170/12302",0.0477849600151484,0.0477849600151484,0.621242648661126,"FOXO3/HIF1A/PRKCE/CREBBP/CPEB2/ATP6V1G1/MDM2/SIRT1/EDN1/EGLN2/DNMT3A",11
GO:0030099,"GO:0030099","myeloid cell differentiation","18/450","321/12302",0.0479787004597555,0.0479787004597555,0.621242648661126,"JUN/FASN/FOXO3/CA2/WDR1/HIF1A/MMP9/KMT2E/NF1/CREB1/CREBBP/MAFB/SIRT1/PTPN6/MEIS2/IL11/UBASH3B/KAT2B",18
GO:0071456,"GO:0071456","cellular response to hypoxia","10/450","150/12302",0.0486820710158061,0.0486820710158061,0.621242648661126,"FOXO3/HIF1A/PRKCE/CREBBP/CPEB2/MDM2/SIRT1/EDN1/EGLN2/DNMT3A",10
GO:0051205,"GO:0051205","protein insertion into membrane","4/450","38/12302",0.0489767497644924,0.0489767497644924,0.621242648661126,"YWHAZ/TP53BP2/SFN/BBC3",4
GO:0051452,"GO:0051452","intracellular pH reduction","4/450","38/12302",0.0489767497644924,0.0489767497644924,0.621242648661126,"ATP6V1E2/CA2/ATP6V1G1/ATP6V0E2",4
GO:1904645,"GO:1904645","response to amyloid-beta","4/450","38/12302",0.0489767497644924,0.0489767497644924,0.621242648661126,"FOXO3/DNM1/MMP9/NGFR",4
GO:0002934,"GO:0002934","desmosome organization","2/450","10/12302",0.0494632690870569,0.0494632690870569,0.621242648661126,"JUP/DSP",2
GO:0003334,"GO:0003334","keratinocyte development","2/450","10/12302",0.0494632690870569,0.0494632690870569,0.621242648661126,"SFN/FOSL2",2
GO:0006054,"GO:0006054","N-acetylneuraminate metabolic process","2/450","10/12302",0.0494632690870569,0.0494632690870569,0.621242648661126,"ST3GAL1/NANP",2
GO:0031392,"GO:0031392","regulation of prostaglandin biosynthetic process","2/450","10/12302",0.0494632690870569,0.0494632690870569,0.621242648661126,"FABP5/SIRT1",2
GO:0032230,"GO:0032230","positive regulation of synaptic transmission, GABAergic","2/450","10/12302",0.0494632690870569,0.0494632690870569,0.621242648661126,"CA2/PRKCE",2
GO:0035067,"GO:0035067","negative regulation of histone acetylation","2/450","10/12302",0.0494632690870569,0.0494632690870569,0.621242648661126,"SIRT1/TAF7",2
GO:0046007,"GO:0046007","negative regulation of activated T cell proliferation","2/450","10/12302",0.0494632690870569,0.0494632690870569,0.621242648661126,"RC3H1/BTN2A2",2
GO:0060340,"GO:0060340","positive regulation of type I interferon-mediated signaling pathway","2/450","10/12302",0.0494632690870569,0.0494632690870569,0.621242648661126,"ZBP1/TBK1",2
GO:0061314,"GO:0061314","Notch signaling involved in heart development","2/450","10/12302",0.0494632690870569,0.0494632690870569,0.621242648661126,"HEY1/DLL4",2
GO:0090308,"GO:0090308","regulation of methylation-dependent chromatin silencing","2/450","10/12302",0.0494632690870569,0.0494632690870569,0.621242648661126,"TASOR/MORC2",2
GO:0090331,"GO:0090331","negative regulation of platelet aggregation","2/450","10/12302",0.0494632690870569,0.0494632690870569,0.621242648661126,"CD9/UBASH3B",2
GO:0098974,"GO:0098974","postsynaptic actin cytoskeleton organization","2/450","10/12302",0.0494632690870569,0.0494632690870569,0.621242648661126,"DBN1/MYH10",2
GO:1904293,"GO:1904293","negative regulation of ERAD pathway","2/450","10/12302",0.0494632690870569,0.0494632690870569,0.621242648661126,"YOD1/UBE2J1",2
GO:0001516,"GO:0001516","prostaglandin biosynthetic process","3/450","23/12302",0.0500519719113544,0.0500519719113544,0.621242648661126,"FABP5/SIRT1/EDN1",3
GO:0006929,"GO:0006929","substrate-dependent cell migration","3/450","23/12302",0.0500519719113544,0.0500519719113544,0.621242648661126,"FN1/MYH10/ITGA2",3
GO:0010586,"GO:0010586","miRNA metabolic process","3/450","23/12302",0.0500519719113544,0.0500519719113544,0.621242648661126,"RC3H1/KHSRP/AGO2",3
GO:0021696,"GO:0021696","cerebellar cortex morphogenesis","3/450","23/12302",0.0500519719113544,0.0500519719113544,0.621242648661126,"KIF14/WHRN/AGTPBP1",3
GO:0046457,"GO:0046457","prostanoid biosynthetic process","3/450","23/12302",0.0500519719113544,0.0500519719113544,0.621242648661126,"FABP5/SIRT1/EDN1",3
GO:0048668,"GO:0048668","collateral sprouting","3/450","23/12302",0.0500519719113544,0.0500519719113544,0.621242648661126,"SPP1/DVL1/COBL",3
GO:1902175,"GO:1902175","regulation of oxidative stress-induced intrinsic apoptotic signaling pathway","3/450","23/12302",0.0500519719113544,0.0500519719113544,0.621242648661126,"HSPB1/HIF1A/SIRT1",3
GO:1902253,"GO:1902253","regulation of intrinsic apoptotic signaling pathway by p53 class mediator","3/450","23/12302",0.0500519719113544,0.0500519719113544,0.621242648661126,"MUC1/MDM2/SIRT1",3
GO:1905521,"GO:1905521","regulation of macrophage migration","3/450","23/12302",0.0500519719113544,0.0500519719113544,0.621242648661126,"MTUS1/CD9/EMILIN1",3
GO:1901570,"GO:1901570","fatty acid derivative biosynthetic process","6/450","73/12302",0.0504514866109237,0.0504514866109237,0.621242648661126,"FASN/FABP5/SIRT1/EDN1/ELOVL7/TECR",6
GO:0060271,"GO:0060271","cilium assembly","16/450","279/12302",0.0508120987571949,0.0508120987571949,0.621242648661126,"DNAAF2/PRKAR2B/CETN2/MNS1/DNALI1/KIF3C/DZIP1L/TUBA1A/SSX2IP/VDAC3/CFAP43/PLK4/JHY/FNBP1L/DCDC2/SEPTIN6",16
GO:0046718,"GO:0046718","viral entry into host cell","7/450","92/12302",0.0513187976151905,0.0513187976151905,0.621242648661126,"DYNLT1/CXADR/CD55/PPIA/SIVA1/LDLR/ITGA2",7
GO:0051193,"GO:0051193","regulation of cofactor metabolic process","7/450","92/12302",0.0513187976151905,0.0513187976151905,0.621242648661126,"NUP54/NUP43/HIF1A/PDP1/PPTC7/PRXL2C/PRDX2",7
GO:0051188,"GO:0051188","cofactor biosynthetic process","15/450","258/12302",0.0520794409487754,0.0520794409487754,0.621242648661126,"MTHFS/NUP54/FASN/COQ5/NUP43/HIF1A/PDP1/GCH1/PDXK/PPTC7/COQ10B/PRXL2C/ELOVL7/TECR/COQ10A",15
GO:2000147,"GO:2000147","positive regulation of cell motility","23/450","438/12302",0.052202336330009,0.052202336330009,0.621242648661126,"FN1/JUN/TRADD/HSPB1/CAMK1D/HBEGF/SEMA4F/CD151/HIF1A/MMP9/LAMB1/SEMA3F/RDX/TGFBR1/PRKCE/MDM2/MAPRE2/SIRT1/IQSEC1/EDN1/AGO2/PAK1/ITGA2",23
GO:1903522,"GO:1903522","regulation of blood circulation","13/450","215/12302",0.0524735967665834,0.0524735967665834,0.621242648661126,"CXADR/TRPC1/JUP/HBEGF/ATP1B1/GCH1/MDM2/FXYD2/SMAD7/DSP/KCNMB4/SNTA1/EDN1",13
GO:0034614,"GO:0034614","cellular response to reactive oxygen species","9/450","132/12302",0.0530463612132325,0.0530463612132325,0.621242648661126,"AGAP3/MAPK9/JUN/FOXO3/MMP9/GCH1/MDM2/SIRT1/PRDX2",9
GO:0030199,"GO:0030199","collagen fibril organization","4/450","39/12302",0.053061806528289,0.053061806528289,0.621242648661126,"P3H4/NF1/TGFBR1/EMILIN1",4
GO:0045851,"GO:0045851","pH reduction","4/450","39/12302",0.053061806528289,0.053061806528289,0.621242648661126,"ATP6V1E2/CA2/ATP6V1G1/ATP6V0E2",4
GO:0046850,"GO:0046850","regulation of bone remodeling","4/450","39/12302",0.053061806528289,0.053061806528289,0.621242648661126,"SPP1/CA2/NF1/UBASH3B",4
GO:0051353,"GO:0051353","positive regulation of oxidoreductase activity","4/450","39/12302",0.053061806528289,0.053061806528289,0.621242648661126,"HIF1A/PDP1/GCH1/EDN1",4
GO:0060412,"GO:0060412","ventricular septum morphogenesis","4/450","39/12302",0.053061806528289,0.053061806528289,0.621242648661126,"FGFR2/HEY1/TGFBR1/SMAD7",4
GO:0031058,"GO:0031058","positive regulation of histone modification","6/450","74/12302",0.0532891331734388,0.0532891331734388,0.621242648661126,"BRD7/MUC1/KMT2E/CDK9/SIRT1/UBE2N",6
GO:0021987,"GO:0021987","cerebral cortex development","7/450","93/12302",0.0538349892094358,0.0538349892094358,0.621242648661126,"KIF14/TACC3/GNG12/HIF1A/LAMB1/NF1/POU3F2",7
GO:0018149,"GO:0018149","peptide cross-linking","3/450","24/12302",0.0557028353896087,0.0557028353896087,0.621242648661126,"FN1/ABCA7/DSP",3
GO:0021772,"GO:0021772","olfactory bulb development","3/450","24/12302",0.0557028353896087,0.0557028353896087,0.621242648661126,"KIF14/EXT1/AGTPBP1",3
GO:0021846,"GO:0021846","cell proliferation in forebrain","3/450","24/12302",0.0557028353896087,0.0557028353896087,0.621242648661126,"KIF14/FGFR2/POU3F2",3
GO:0022616,"GO:0022616","DNA strand elongation","3/450","24/12302",0.0557028353896087,0.0557028353896087,0.621242648661126,"POLD2/LIG1/RFC3",3
GO:0039694,"GO:0039694","viral RNA genome replication","3/450","24/12302",0.0557028353896087,0.0557028353896087,0.621242648661126,"TASOR/FBXL2/MORC2",3
GO:0045730,"GO:0045730","respiratory burst","3/450","24/12302",0.0557028353896087,0.0557028353896087,0.621242648661126,"CAMK1D/CD55/PRDX2",3
GO:0043502,"GO:0043502","regulation of muscle adaptation","6/450","75/12302",0.0562219047227674,0.0562219047227674,0.621242648661126,"FOXO3/YY1/CDK9/EDN1/PAK1/FBXO32",6
GO:1902106,"GO:1902106","negative regulation of leukocyte differentiation","6/450","75/12302",0.0562219047227674,0.0562219047227674,0.621242648661126,"RC3H1/NF1/MAFB/SMAD7/UBASH3B/PRDX2",6
GO:0032147,"GO:0032147","activation of protein kinase activity","16/450","283/12302",0.0563719948713472,0.0563719948713472,0.621242648661126,"TRAF4/KIF14/ADCY3/PRKAR2B/MAP4K2/MAP3K15/STK10/ADCY9/PAK4/MAP3K21/TGFBR1/DUSP6/UBE2N/MAP3K2/PRDX2/PAK1",16
GO:0040014,"GO:0040014","regulation of multicellular organism growth","5/450","57/12302",0.0567226095018132,0.0567226095018132,0.621242648661126,"ATRN/SH3PXD2B/CREB1/POU3F2/SOCS2",5
GO:0043407,"GO:0043407","negative regulation of MAP kinase activity","5/450","57/12302",0.0567226095018132,0.0567226095018132,0.621242648661126,"DUSP4/NF1/DUSP6/PTPN6/HIPK3",5
GO:0051702,"GO:0051702","interaction with symbiont","5/450","57/12302",0.0567226095018132,0.0567226095018132,0.621242648661126,"FN1/JUN/TARDBP/CHD1/FBXL2",5
GO:0055013,"GO:0055013","cardiac muscle cell development","5/450","57/12302",0.0567226095018132,0.0567226095018132,0.621242648661126,"CXADR/MYH10/YY1/EDN1/PAK1",5
GO:0072332,"GO:0072332","intrinsic apoptotic signaling pathway by p53 class mediator","5/450","57/12302",0.0567226095018132,0.0567226095018132,0.621242648661126,"MUC1/TP53BP2/MDM2/SIRT1/DYRK2",5
GO:1903747,"GO:1903747","regulation of establishment of protein localization to mitochondrion","5/450","57/12302",0.0567226095018132,0.0567226095018132,0.621242648661126,"YWHAZ/TP53BP2/SFN/SREBF2/BBC3",5
GO:0120032,"GO:0120032","regulation of plasma membrane bounded cell projection assembly","9/450","134/12302",0.0573082521386858,0.0573082521386858,0.621242648661126,"MNS1/CDC42EP4/RDX/COBL/TGFBR1/VDAC3/FNBP1L/DCDC2/RHOG",9
GO:0003197,"GO:0003197","endocardial cushion development","4/450","40/12302",0.0573263319646368,0.0573263319646368,0.621242648661126,"HEY1/TGFBR1/MDM2/ERBB3",4
GO:0032371,"GO:0032371","regulation of sterol transport","4/450","40/12302",0.0573263319646368,0.0573263319646368,0.621242648661126,"ABCA1/ABCA7/SIRT1/SREBF2",4
GO:0032374,"GO:0032374","regulation of cholesterol transport","4/450","40/12302",0.0573263319646368,0.0573263319646368,0.621242648661126,"ABCA1/ABCA7/SIRT1/SREBF2",4
GO:0035082,"GO:0035082","axoneme assembly","4/450","40/12302",0.0573263319646368,0.0573263319646368,0.621242648661126,"DNAAF2/DNALI1/CFAP43/JHY",4
GO:0045747,"GO:0045747","positive regulation of Notch signaling pathway","4/450","40/12302",0.0573263319646368,0.0573263319646368,0.621242648661126,"DLL4/CREBBP/KAT2B/TSPAN14",4
GO:0055025,"GO:0055025","positive regulation of cardiac muscle tissue development","4/450","40/12302",0.0573263319646368,0.0573263319646368,0.621242648661126,"FGFR2/CREB1/EDN1/ERBB3",4
GO:0031056,"GO:0031056","regulation of histone modification","8/450","114/12302",0.0575075198496951,0.0575075198496951,0.621242648661126,"SETD5/BRD7/MUC1/KMT2E/CDK9/SIRT1/UBE2N/TAF7",8
GO:0034599,"GO:0034599","cellular response to oxidative stress","14/450","240/12302",0.0578633900981752,0.0578633900981752,0.621242648661126,"AGAP3/MAPK9/JUN/HSPB1/DAPK1/FOXO3/ALDH3B1/HIF1A/MMP9/GCH1/CPEB2/MDM2/SIRT1/PRDX2",14
GO:0061013,"GO:0061013","regulation of mRNA catabolic process","10/450","155/12302",0.0583206267928479,0.0583206267928479,0.621242648661126,"YWHAZ/PAIP1/HSPB1/TARDBP/RC3H1/KHSRP/TOB1/IGF2BP3/THRAP3/AGO2",10
GO:0051495,"GO:0051495","positive regulation of cytoskeleton organization","11/450","176/12302",0.0585219813648693,0.0585219813648693,0.621242648661126,"GPSM2/CDC42EP4/SH3PXD2B/WDR1/TGFBR1/PRKCE/PLK4/EDN1/ID1/PFDN2/PAK1",11
GO:0018205,"GO:0018205","peptidyl-lysine modification","17/450","307/12302",0.0588359078696416,0.0588359078696416,0.621242648661126,"SETD5/BRD7/JADE2/MUC1/KLF15/NUP54/BEND3/NUP43/P3H4/KMT2E/CREBBP/MDM2/SIRT1/PHF10/TAF7/KAT2B/SMYD3",17
GO:0010763,"GO:0010763","positive regulation of fibroblast migration","2/450","11/12302",0.0590236110357859,0.0590236110357859,0.621242648661126,"PRKCE/PAK1",2
GO:0010870,"GO:0010870","positive regulation of receptor biosynthetic process","2/450","11/12302",0.0590236110357859,0.0590236110357859,0.621242648661126,"HIF1A/EDN1",2
GO:0031581,"GO:0031581","hemidesmosome assembly","2/450","11/12302",0.0590236110357859,0.0590236110357859,0.621242648661126,"ITGB4/CD151",2
GO:0039692,"GO:0039692","single stranded viral RNA replication via double stranded DNA intermediate","2/450","11/12302",0.0590236110357859,0.0590236110357859,0.621242648661126,"TASOR/MORC2",2
GO:0042983,"GO:0042983","amyloid precursor protein biosynthetic process","2/450","11/12302",0.0590236110357859,0.0590236110357859,0.621242648661126,"ABCA7/AGO2",2
GO:0042984,"GO:0042984","regulation of amyloid precursor protein biosynthetic process","2/450","11/12302",0.0590236110357859,0.0590236110357859,0.621242648661126,"ABCA7/AGO2",2
GO:0043652,"GO:0043652","engulfment of apoptotic cell","2/450","11/12302",0.0590236110357859,0.0590236110357859,0.621242648661126,"ABCA7/XKR8",2
GO:0045091,"GO:0045091","regulation of single stranded viral RNA replication via double stranded DNA intermediate","2/450","11/12302",0.0590236110357859,0.0590236110357859,0.621242648661126,"TASOR/MORC2",2
GO:0045623,"GO:0045623","negative regulation of T-helper cell differentiation","2/450","11/12302",0.0590236110357859,0.0590236110357859,0.621242648661126,"RC3H1/SMAD7",2
GO:0045722,"GO:0045722","positive regulation of gluconeogenesis","2/450","11/12302",0.0590236110357859,0.0590236110357859,0.621242648661126,"SIRT1/KAT2B",2
GO:0060100,"GO:0060100","positive regulation of phagocytosis, engulfment","2/450","11/12302",0.0590236110357859,0.0590236110357859,0.621242648661126,"ABCA7/ITGA2",2
GO:0071361,"GO:0071361","cellular response to ethanol","2/450","11/12302",0.0590236110357859,0.0590236110357859,0.621242648661126,"PRKCE/DNMT3A",2
GO:0071391,"GO:0071391","cellular response to estrogen stimulus","2/450","11/12302",0.0590236110357859,0.0590236110357859,0.621242648661126,"SRA1/MDM2",2
GO:0090239,"GO:0090239","regulation of histone H4 acetylation","2/450","11/12302",0.0590236110357859,0.0590236110357859,0.621242648661126,"MUC1/SIRT1",2
GO:1902166,"GO:1902166","negative regulation of intrinsic apoptotic signaling pathway in response to DNA damage by p53 class mediator","2/450","11/12302",0.0590236110357859,0.0590236110357859,0.621242648661126,"MUC1/SIRT1",2
GO:1905155,"GO:1905155","positive regulation of membrane invagination","2/450","11/12302",0.0590236110357859,0.0590236110357859,0.621242648661126,"ABCA7/ITGA2",2
GO:1990000,"GO:1990000","amyloid fibril formation","2/450","11/12302",0.0590236110357859,0.0590236110357859,0.621242648661126,"MDM2/LDLR",2
GO:0010822,"GO:0010822","positive regulation of mitochondrion organization","7/450","95/12302",0.0590955020468887,0.0590955020468887,0.621242648661126,"YWHAZ/TP53BP2/HIF1A/MMP9/SFN/SREBF2/BBC3",7
GO:0009416,"GO:0009416","response to light stimulus","14/450","241/12302",0.0594826373123013,0.0594826373123013,0.621242648661126,"SDF4/PITPNM1/HIF1A/YY1/NF1/CREB1/CREBBP/FBXL3/JUND/MDM2/SIRT1/RBM4B/MEIS2/NPTN",14
GO:0061136,"GO:0061136","regulation of proteasomal protein catabolic process","9/450","135/12302",0.0595197951841369,0.0595197951841369,0.621242648661126,"MAPK9/YOD1/UBE2J1/DVL1/MDM2/RNF19B/SMAD7/TRIB2/DNAJB2",9
GO:0001837,"GO:0001837","epithelial to mesenchymal transition","8/450","115/12302",0.0599344803264503,0.0599344803264503,0.621242648661126,"TGFB1I1/HNRNPAB/FGFR2/HIF1A/HEY1/TGFBR1/MCRIP1/SMAD7",8
GO:0015914,"GO:0015914","phospholipid transport","5/450","58/12302",0.0602972313888048,0.0602972313888048,0.621242648661126,"ABCA1/ATP8B2/PITPNM1/ABCA7/LDLR",5
GO:0045844,"GO:0045844","positive regulation of striated muscle tissue development","5/450","58/12302",0.0602972313888048,0.0602972313888048,0.621242648661126,"FGFR2/GPC1/CREB1/EDN1/ERBB3",5
GO:0048636,"GO:0048636","positive regulation of muscle organ development","5/450","58/12302",0.0602972313888048,0.0602972313888048,0.621242648661126,"FGFR2/GPC1/CREB1/EDN1/ERBB3",5
GO:0003091,"GO:0003091","renal water homeostasis","3/450","25/12302",0.0616429825096218,0.0616429825096218,0.621242648661126,"ADCY3/PRKAR2B/ADCY9",3
GO:0014044,"GO:0014044","Schwann cell development","3/450","25/12302",0.0616429825096218,0.0616429825096218,0.621242648661126,"NF1/POU3F2/LAMB2",3
GO:0021988,"GO:0021988","olfactory lobe development","3/450","25/12302",0.0616429825096218,0.0616429825096218,0.621242648661126,"KIF14/EXT1/AGTPBP1",3
GO:1901797,"GO:1901797","negative regulation of signal transduction by p53 class mediator","3/450","25/12302",0.0616429825096218,0.0616429825096218,0.621242648661126,"MUC1/MDM2/SIRT1",3
GO:0006911,"GO:0006911","phagocytosis, engulfment","4/450","41/12302",0.0617689415257846,0.0617689415257846,0.621242648661126,"ABCA1/ABCA7/XKR8/ITGA2",4
GO:1902373,"GO:1902373","negative regulation of mRNA catabolic process","4/450","41/12302",0.0617689415257846,0.0617689415257846,0.621242648661126,"PAIP1/TARDBP/TOB1/THRAP3",4
GO:0048771,"GO:0048771","tissue remodeling","9/450","136/12302",0.0617854399974789,0.0617854399974789,0.621242648661126,"SPP1/CA2/HIF1A/P3H4/NF1/DLL4/LIPA/MDM2/UBASH3B",9
GO:0060491,"GO:0060491","regulation of cell projection assembly","9/450","136/12302",0.0617854399974789,0.0617854399974789,0.621242648661126,"MNS1/CDC42EP4/RDX/COBL/TGFBR1/VDAC3/FNBP1L/DCDC2/RHOG",9
GO:0008637,"GO:0008637","apoptotic mitochondrial changes","7/450","96/12302",0.0618404139828521,0.0618404139828521,0.621242648661126,"YWHAZ/JUN/TP53BP2/MMP9/SFN/THEM4/BBC3",7
GO:0051196,"GO:0051196","regulation of coenzyme metabolic process","6/450","77/12302",0.0623737404407949,0.0623737404407949,0.621242648661126,"NUP54/NUP43/HIF1A/PDP1/PPTC7/PRXL2C",6
GO:0062013,"GO:0062013","positive regulation of small molecule metabolic process","8/450","116/12302",0.0624250173300133,0.0624250173300133,0.621242648661126,"BEND3/HIF1A/PRKCE/SIRT1/STARD4/KAT2B/PRXL2C/DYRK2",8
GO:1900076,"GO:1900076","regulation of cellular response to insulin stimulus","5/450","59/12302",0.0639970993383185,0.0639970993383185,0.621242648661126,"GRB14/SIRT1/SIK2/PAK1/SOCS2",5
GO:1901863,"GO:1901863","positive regulation of muscle tissue development","5/450","59/12302",0.0639970993383185,0.0639970993383185,0.621242648661126,"FGFR2/GPC1/CREB1/EDN1/ERBB3",5
GO:0009152,"GO:0009152","purine ribonucleotide biosynthetic process","13/450","222/12302",0.0643359425168886,0.0643359425168886,0.621242648661126,"NME9/ADCY3/VPS9D1/NUP54/FASN/ADCY9/SLC25A13/NUP43/HIF1A/PDP1/PRXL2C/ELOVL7/TECR",13
GO:0033157,"GO:0033157","regulation of intracellular protein transport","11/450","179/12302",0.0644449605304941,0.0644449605304941,0.621242648661126,"YOD1/JUP/UBE2J1/NUP54/TARDBP/NF1/SFN/MDM2/LCP1/SREBF2/PAK1",11
GO:0046887,"GO:0046887","positive regulation of hormone secretion","7/450","97/12302",0.064662055719942,0.064662055719942,0.621242648661126,"GLUL/SPP1/TARDBP/HIF1A/CREB1/PRKCE/EDN1",7
GO:0055067,"GO:0055067","monovalent inorganic cation homeostasis","8/450","117/12302",0.0649793611793259,0.0649793611793259,0.621242648661126,"ATP6V1E2/MAFG/SLC9A2/CA2/ATP1B1/ATP6V1G1/EDN1/ATP6V0E2",8
GO:0061351,"GO:0061351","neural precursor cell proliferation","8/450","117/12302",0.0649793611793259,0.0649793611793259,0.621242648661126,"KIF14/FGFR2/DBN1/FOXO3/HIF1A/NF1/DLL4/POU3F2",8
GO:0051272,"GO:0051272","positive regulation of cellular component movement","23/450","449/12302",0.0650794906073116,0.0650794906073116,0.621242648661126,"FN1/JUN/TRADD/HSPB1/CAMK1D/HBEGF/SEMA4F/CD151/HIF1A/MMP9/LAMB1/SEMA3F/RDX/TGFBR1/PRKCE/MDM2/MAPRE2/SIRT1/IQSEC1/EDN1/AGO2/PAK1/ITGA2",23
GO:0002027,"GO:0002027","regulation of heart rate","6/450","78/12302",0.0655930208807597,0.0655930208807597,0.621242648661126,"JUP/GCH1/MDM2/DSP/SNTA1/EDN1",6
GO:0032231,"GO:0032231","regulation of actin filament bundle assembly","6/450","78/12302",0.0655930208807597,0.0655930208807597,0.621242648661126,"ARHGAP28/SH3PXD2B/RDX/TGFBR1/ID1/PAK1",6
GO:0007178,"GO:0007178","transmembrane receptor protein serine/threonine kinase signaling pathway","15/450","267/12302",0.0660107485031898,0.0660107485031898,0.621242648661126,"TGFB1I1/JUN/ZNF423/TOB1/TGFBR1/CREB1/CREBBP/SIRT1/SMAD7/AMHR2/EMILIN1/ACVR1C/ID1/SPTBN1/BMPER",15
GO:0007566,"GO:0007566","embryo implantation","4/450","42/12302",0.0663879232147587,0.0663879232147587,0.621242648661126,"SPP1/MMP9/ACVR1C/AGO2",4
GO:0061014,"GO:0061014","positive regulation of mRNA catabolic process","4/450","42/12302",0.0663879232147587,0.0663879232147587,0.621242648661126,"RC3H1/KHSRP/TOB1/AGO2",4
GO:0007423,"GO:0007423","sensory organ development","22/450","427/12302",0.0667270545296913,0.0667270545296913,0.621242648661126,"FGFR2/JUN/MYCL/TENM3/SH3PXD2B/SOBP/LRP10/DVL1/HIF1A/MYH10/YY1/NF1/TGFBR1/DLL4/MAFB/MEIS2/LAMB2/WHRN/EDN1/AGTPBP1/MCOLN3/BMPER",22
GO:0036294,"GO:0036294","cellular response to decreased oxygen levels","10/450","159/12302",0.0668725515560993,0.0668725515560993,0.621242648661126,"FOXO3/HIF1A/PRKCE/CREBBP/CPEB2/MDM2/SIRT1/EDN1/EGLN2/DNMT3A",10
GO:0050792,"GO:0050792","regulation of viral process","10/450","159/12302",0.0668725515560993,0.0668725515560993,0.621242648661126,"DYNLT1/JUN/TMEM250/TARDBP/TASOR/CDK9/CHD1/PPIA/FBXL2/MORC2",10
GO:0006935,"GO:0006935","chemotaxis","24/450","474/12302",0.067120597510959,0.067120597510959,0.621242648661126,"MTUS1/EPHB4/ZSWIM6/CXADR/GPC1/HSPB1/CMTM8/CAMK1D/YTHDF1/EXT1/HBEGF/SEMA4F/RANBP9/DVL1/MYH10/SEMA3F/CREB1/SH3KBP1/LAMB2/EDN1/SPTBN1/RHOG/ITGA2/NPTN",24
GO:0042330,"GO:0042330","taxis","24/450","474/12302",0.067120597510959,0.067120597510959,0.621242648661126,"MTUS1/EPHB4/ZSWIM6/CXADR/GPC1/HSPB1/CMTM8/CAMK1D/YTHDF1/EXT1/HBEGF/SEMA4F/RANBP9/DVL1/MYH10/SEMA3F/CREB1/SH3KBP1/LAMB2/EDN1/SPTBN1/RHOG/ITGA2/NPTN",24
GO:0006446,"GO:0006446","regulation of translational initiation","5/450","60/12302",0.0678217880020199,0.0678217880020199,0.621242648661126,"PAIP1/HSPB1/YTHDF1/C8orf88/AGO2",5
GO:0086001,"GO:0086001","cardiac muscle cell action potential","5/450","60/12302",0.0678217880020199,0.0678217880020199,0.621242648661126,"CXADR/JUP/ATP1B1/DSP/SNTA1",5
GO:0010762,"GO:0010762","regulation of fibroblast migration","3/450","26/12302",0.0678645793122108,0.0678645793122108,0.621242648661126,"PRKCE/MTA2/PAK1",3
GO:0032228,"GO:0032228","regulation of synaptic transmission, GABAergic","3/450","26/12302",0.0678645793122108,0.0678645793122108,0.621242648661126,"CA2/NF1/PRKCE",3
GO:0033363,"GO:0033363","secretory granule organization","3/450","26/12302",0.0678645793122108,0.0678645793122108,0.621242648661126,"ABCA1/TBPL1/CREB1",3
GO:0040018,"GO:0040018","positive regulation of multicellular organism growth","3/450","26/12302",0.0678645793122108,0.0678645793122108,0.621242648661126,"SH3PXD2B/CREB1/POU3F2",3
GO:0042491,"GO:0042491","inner ear auditory receptor cell differentiation","3/450","26/12302",0.0678645793122108,0.0678645793122108,0.621242648661126,"MYCL/WHRN/MCOLN3",3
GO:0042558,"GO:0042558","pteridine-containing compound metabolic process","3/450","26/12302",0.0678645793122108,0.0678645793122108,0.621242648661126,"MTHFS/GCH1/GGH",3
GO:0051930,"GO:0051930","regulation of sensory perception of pain","3/450","26/12302",0.0678645793122108,0.0678645793122108,0.621242648661126,"SCN11A/FABP5/EDN1",3
GO:0014706,"GO:0014706","striated muscle tissue development","16/450","291/12302",0.068723662465449,0.068723662465449,0.621242648661126,"FGFR2/CXADR/GPC1/MYH10/YY1/NF1/TGFBR1/CREB1/DLL4/CENPF/SMAD7/DSP/EDN1/GPCPD1/ERBB3/PAK1",16
GO:0042035,"GO:0042035","regulation of cytokine biosynthetic process","6/450","79/12302",0.0689078603605362,0.0689078603605362,0.621242648661126,"HSPB1/UBE2J1/TICAM1/IGF2BP3/TBK1/TRIB2",6
GO:0042136,"GO:0042136","neurotransmitter biosynthetic process","6/450","79/12302",0.0689078603605362,0.0689078603605362,0.621242648661126,"KHSRP/TICAM1/GCH1/MOXD1/EDN1/TPH2",6
GO:0060419,"GO:0060419","heart growth","6/450","79/12302",0.0689078603605362,0.0689078603605362,0.621242648661126,"FGFR2/YY1/TGFBR1/DUSP6/EDN1/PAK1",6
GO:0000470,"GO:0000470","maturation of LSU-rRNA","2/450","12/12302",0.0691566712154846,0.0691566712154846,0.621242648661126,"MRPL1/ZNHIT6",2
GO:0003222,"GO:0003222","ventricular trabecula myocardium morphogenesis","2/450","12/12302",0.0691566712154846,0.0691566712154846,0.621242648661126,"TGFBR1/DLL4",2
GO:0006474,"GO:0006474","N-terminal protein amino acid acetylation","2/450","12/12302",0.0691566712154846,0.0691566712154846,0.621242648661126,"CREBBP/KAT2B",2
GO:0007379,"GO:0007379","segment specification","2/450","12/12302",0.0691566712154846,0.0691566712154846,0.621242648661126,"COBL/MAFB",2
GO:0010225,"GO:0010225","response to UV-C","2/450","12/12302",0.0691566712154846,0.0691566712154846,0.621242648661126,"YY1/MDM2",2
GO:0019471,"GO:0019471","4-hydroxyproline metabolic process","2/450","12/12302",0.0691566712154846,0.0691566712154846,0.621242648661126,"HOGA1/EGLN2",2
GO:0030497,"GO:0030497","fatty acid elongation","2/450","12/12302",0.0691566712154846,0.0691566712154846,0.621242648661126,"ELOVL7/TECR",2
GO:0034380,"GO:0034380","high-density lipoprotein particle assembly","2/450","12/12302",0.0691566712154846,0.0691566712154846,0.621242648661126,"ABCA1/ABCA7",2
GO:0034497,"GO:0034497","protein localization to phagophore assembly site","2/450","12/12302",0.0691566712154846,0.0691566712154846,0.621242648661126,"TRAPPC8/PACS2",2
GO:0035358,"GO:0035358","regulation of peroxisome proliferator activated receptor signaling pathway","2/450","12/12302",0.0691566712154846,0.0691566712154846,0.621242648661126,"FABP5/SIRT1",2
GO:0035372,"GO:0035372","protein localization to microtubule","2/450","12/12302",0.0691566712154846,0.0691566712154846,0.621242648661126,"DVL1/MAPRE2",2
GO:0036124,"GO:0036124","histone H3-K9 trimethylation","2/450","12/12302",0.0691566712154846,0.0691566712154846,0.621242648661126,"BEND3/SIRT1",2
GO:0042559,"GO:0042559","pteridine-containing compound biosynthetic process","2/450","12/12302",0.0691566712154846,0.0691566712154846,0.621242648661126,"MTHFS/GCH1",2
GO:0042761,"GO:0042761","very long-chain fatty acid biosynthetic process","2/450","12/12302",0.0691566712154846,0.0691566712154846,0.621242648661126,"ELOVL7/TECR",2
GO:0043518,"GO:0043518","negative regulation of DNA damage response, signal transduction by p53 class mediator","2/450","12/12302",0.0691566712154846,0.0691566712154846,0.621242648661126,"MDM2/SIRT1",2
GO:0043923,"GO:0043923","positive regulation by host of viral transcription","2/450","12/12302",0.0691566712154846,0.0691566712154846,0.621242648661126,"JUN/CHD1",2
GO:0048308,"GO:0048308","organelle inheritance","2/450","12/12302",0.0691566712154846,0.0691566712154846,0.621242648661126,"YWHAZ/STX5",2
GO:0048313,"GO:0048313","Golgi inheritance","2/450","12/12302",0.0691566712154846,0.0691566712154846,0.621242648661126,"YWHAZ/STX5",2
GO:0048712,"GO:0048712","negative regulation of astrocyte differentiation","2/450","12/12302",0.0691566712154846,0.0691566712154846,0.621242648661126,"NF1/LDLR",2
GO:0051382,"GO:0051382","kinetochore assembly","2/450","12/12302",0.0691566712154846,0.0691566712154846,0.621242648661126,"CENPF/POGZ",2
GO:0060213,"GO:0060213","positive regulation of nuclear-transcribed mRNA poly(A) tail shortening","2/450","12/12302",0.0691566712154846,0.0691566712154846,0.621242648661126,"TOB1/AGO2",2
GO:0070831,"GO:0070831","basement membrane assembly","2/450","12/12302",0.0691566712154846,0.0691566712154846,0.621242648661126,"LAMB1/LAMB2",2
GO:0099188,"GO:0099188","postsynaptic cytoskeleton organization","2/450","12/12302",0.0691566712154846,0.0691566712154846,0.621242648661126,"DBN1/MYH10",2
GO:1902165,"GO:1902165","regulation of intrinsic apoptotic signaling pathway in response to DNA damage by p53 class mediator","2/450","12/12302",0.0691566712154846,0.0691566712154846,0.621242648661126,"MUC1/SIRT1",2
GO:1903588,"GO:1903588","negative regulation of blood vessel endothelial cell proliferation involved in sprouting angiogenesis","2/450","12/12302",0.0691566712154846,0.0691566712154846,0.621242648661126,"DLL4/NGFR",2
GO:2000193,"GO:2000193","positive regulation of fatty acid transport","2/450","12/12302",0.0691566712154846,0.0691566712154846,0.621242648661126,"EDN1/FABP3",2
GO:2001279,"GO:2001279","regulation of unsaturated fatty acid biosynthetic process","2/450","12/12302",0.0691566712154846,0.0691566712154846,0.621242648661126,"FABP5/SIRT1",2
GO:0043410,"GO:0043410","positive regulation of MAPK cascade","22/450","429/12302",0.0694049521052457,0.0694049521052457,0.621242648661126,"TRAF4/FGFR4/MAP4K2/FGFR2/JUN/MAP3K15/ABCA7/RAP1B/MAP3K21/BRAF/TGFBR1/PRKCE/DUSP6/IL11/EDN1/UBE2N/MAP3K2/PRXL2C/PRDX2/BMPER/PAK1/NPTN",22
GO:0032434,"GO:0032434","regulation of proteasomal ubiquitin-dependent protein catabolic process","7/450","99/12302",0.0705360433085256,0.0705360433085256,0.621242648661126,"MAPK9/DVL1/MDM2/RNF19B/SMAD7/TRIB2/DNAJB2",7
GO:0097345,"GO:0097345","mitochondrial outer membrane permeabilization","4/450","43/12302",0.0711812542188343,0.0711812542188343,0.621242648661126,"YWHAZ/TP53BP2/SFN/BBC3",4
GO:2000045,"GO:2000045","regulation of G1/S transition of mitotic cell cycle","9/450","140/12302",0.0713934373847543,0.0713934373847543,0.621242648661126,"KIF14/BRD7/MUC1/KMT2E/RDX/SFN/MDM2/PTPN6/BTN2A2",9
GO:0016049,"GO:0016049","cell growth","20/450","384/12302",0.0714023187734175,0.0714023187734175,0.621242648661126,"SPP1/KIF14/FN1/DBN1/HBEGF/SEMA4F/PAK4/DVL1/SEMA3F/YY1/COBL/TGFBR1/SFN/SIRT1/LAMB2/EDN1/EGLN2/PAK1/SOCS2/DNAJB2",20
GO:1902105,"GO:1902105","regulation of leukocyte differentiation","12/450","204/12302",0.0715915705608725,0.0715915705608725,0.621242648661126,"JUN/RC3H1/CA2/SOX13/NF1/CREB1/MAFB/PTPN6/SMAD7/BTN2A2/UBASH3B/PRDX2",12
[truncated: 3,662 more rows]

## Sheet: cluster3
,"ID","Description","GeneRatio","BgRatio","pvalue","p.adjust","qvalue","geneID","Count"
[truncated: 3,962 more rows]

[truncated: 17 more sheets: cluster4, cluster5, cluster6, cluster7, cluster8, cluster9, cluster10, cluster11, cluster12, cluster13, cluster14, cluster15, cluster16, cluster17, cluster18, cluster19, cluster20]
