# Supplementary material for: Decoding mechanism of action and sensitivity to drug candidates from integrated transcriptome and chromatin state
Source: eLife. 2022 Aug 31;11:e78012. doi: 10.7554/eLife.78012 (PMC9433094; doi:10.7554/eLife.78012)
Supplement: Supplementary file 4. [file elife-78012-supp4.xlsx]

## Sheet: darkgreen
,"ID","Description","GeneRatio","BgRatio","pvalue","p.adjust","qvalue","geneID","Count"
GO:1901653,"GO:1901653","cellular response to peptide","18/304","398/18866",8.75703283424678e-05,8.75703283424678e-05,0.141350675318203,"ADCY7/ASS1/BACE1/CREB1/EDN1/EPHA4/FBN1/FOXO3/FYN/GCLC/INSIG1/IRS2/KAT2B/MYO1C/PDK4/RIPK2/SORBS1/TNS2",18
GO:0010038,"GO:0010038","response to metal ion","17/304","366/18866",9.95843455114941e-05,9.95843455114941e-05,0.141350675318203,"ADCY7/ASS1/ATP13A2/BACE1/BNIP3/BRAF/CREB1/EDN1/GCLC/GGH/JUN/KCNMB4/PRKN/SLC25A13/SLC40A1/SYT12/TRPC1",17
GO:0048639,"GO:0048639","positive regulation of developmental growth","11/304","187/18866",0.000234182062260505,0.000234182062260505,0.141350675318203,"CREB1/DBN1/EDN1/FN1/GLI1/POU3F2/PRKN/SEMA5A/SMAD7/UNC13A/YBX3",11
GO:0044272,"GO:0044272","sulfur compound biosynthetic process","11/304","192/18866",0.00029398391099682,0.00029398391099682,0.141350675318203,"B4GAT1/CHST6/CHSY3/ELOVL7/GCLC/HACD1/MAT2B/PDK4/PDP1/ST3GAL1/VCAN",11
GO:0071398,"GO:0071398","cellular response to fatty acid","6/304","57/18866",0.000303120663625819,0.000303120663625819,0.141350675318203,"ASS1/CREB1/EDN1/LDLR/PDK4/SMARCD1",6
GO:0071248,"GO:0071248","cellular response to metal ion","11/304","193/18866",0.00030737126267599,0.00030737126267599,0.141350675318203,"ADCY7/ATP13A2/BACE1/BNIP3/BRAF/CREB1/EDN1/JUN/PRKN/SLC40A1/SYT12",11
GO:0071375,"GO:0071375","cellular response to peptide hormone stimulus","15/304","330/18866",0.000319519707620864,0.000319519707620864,0.141350675318203,"ADCY7/ASS1/CREB1/EDN1/FBN1/FOXO3/FYN/GCLC/INSIG1/IRS2/KAT2B/MYO1C/PDK4/SORBS1/TNS2",15
GO:0043434,"GO:0043434","response to peptide hormone","18/304","447/18866",0.000364341903126735,0.000364341903126735,0.141350675318203,"ADCY7/ASS1/BMP7/CREB1/EDN1/FBN1/FOXO3/FYN/GCLC/GGH/INPPL1/INSIG1/IRS2/KAT2B/MYO1C/PDK4/SORBS1/TNS2",18
GO:2000377,"GO:2000377","regulation of reactive oxygen species metabolic process","11/304","200/18866",0.000416245538387991,0.000416245538387991,0.141350675318203,"ASS1/ATG5/BMP7/BNIP3/EDN1/FOXO3/FYN/GCH1/PRKN/STK17A/WDR35",11
GO:0099177,"GO:0099177","regulation of trans-synaptic signaling","18/304","455/18866",0.000449502358616398,0.000449502358616398,0.141350675318203,"BACE1/CREB1/DBN1/EDN1/EPHA4/FABP5/FYN/GRM8/KCNMB4/NRGN/PICK1/PLCL1/PRKN/RGS4/SHANK2/SYT12/UNC13A/VAMP1",18
GO:0048511,"GO:0048511","rhythmic process","14/304","305/18866",0.000456181147954052,0.000456181147954052,0.141350675318203,"ASS1/CAVIN3/CCAR2/CREB1/ENOX1/FBXW11/FOXO3/GPR176/HNF4A/JUN/KAT2B/RBM4B/RORB/SLIT2",14
GO:0070542,"GO:0070542","response to fatty acid","7/304","90/18866",0.000627775715169578,0.000627775715169578,0.178310330326236,"ASS1/CREB1/EDN1/FOXO3/LDLR/PDK4/SMARCD1",7
GO:0006006,"GO:0006006","glucose metabolic process","11/304","214/18866",0.000732392474898047,0.000732392474898047,0.192023225402419,"BPGM/FABP5/FOXA2/INPPL1/IRS2/KAT2B/PDK4/PRKN/SLC25A13/SLC35B4/SORBS1",11
GO:0071241,"GO:0071241","cellular response to inorganic substance","11/304","221/18866",0.000953350441328481,0.000953350441328481,0.232101408197114,"ADCY7/ATP13A2/BACE1/BNIP3/BRAF/CREB1/EDN1/JUN/PRKN/SLC40A1/SYT12",11
GO:0071287,"GO:0071287","cellular response to manganese ion","3/304","13/18866",0.00105102258145105,0.00105102258145105,0.238821832893931,"ATP13A2/BACE1/PRKN",3
GO:0050804,"GO:0050804","modulation of chemical synaptic transmission","17/304","454/18866",0.00117633163402561,0.00117633163402561,0.246696081614392,"BACE1/CREB1/DBN1/EDN1/EPHA4/FYN/GRM8/KCNMB4/NRGN/PICK1/PLCL1/PRKN/RGS4/SHANK2/SYT12/UNC13A/VAMP1",17
GO:0001961,"GO:0001961","positive regulation of cytokine-mediated signaling pathway","5/304","50/18866",0.00123043289625461,0.00123043289625461,0.246696081614392,"EDN1/MED1/PRKN/RIPK2/TRIM6",5
GO:0016050,"GO:0016050","vesicle organization","14/304","340/18866",0.00130669710306637,0.00130669710306637,0.247431884194673,"ALS2CL/ATP13A2/CREB1/F5/F8/INSIG1/MIA3/PRKN/RAB32/SNX19/TBPL1/TRAPPC6B/UNC13A/VAMP1",14
GO:0042159,"GO:0042159","lipoprotein catabolic process","3/304","15/18866",0.00163262072654794,0.00163262072654794,0.262777563307271,"LDLR/LYPLA1/LYPLAL1",3
GO:1903960,"GO:1903960","negative regulation of anion transmembrane transport","3/304","15/18866",0.00163262072654794,0.00163262072654794,0.262777563307271,"IRS2/RGS4/SLC43A1",3
GO:0048588,"GO:0048588","developmental cell growth","11/304","237/18866",0.00167012935214311,0.00167012935214311,0.262777563307271,"DBN1/EDN1/FN1/PRKN/RAPH1/RGS4/SEMA5A/SLIT2/SMAD7/SPP1/UNC13A",11
GO:0010827,"GO:0010827","regulation of glucose transmembrane transport","6/304","79/18866",0.0017285882077136,0.0017285882077136,0.262777563307271,"BRAF/EDN1/FABP5/IRS2/SORBS1/YES1",6
GO:0006024,"GO:0006024","glycosaminoglycan biosynthetic process","7/304","108/18866",0.00183361940637446,0.00183361940637446,0.262777563307271,"B4GAT1/CHST6/CHSY3/EXT1/GPC5/ST3GAL1/VCAN",7
GO:0048638,"GO:0048638","regulation of developmental growth","14/304","353/18866",0.0018542927040816,0.0018542927040816,0.262777563307271,"CREB1/CXADR/DBN1/EDN1/FN1/GLI1/POU3F2/PRKN/RGS4/SEMA5A/SMAD7/SPP1/UNC13A/YBX3",14
GO:0007409,"GO:0007409","axonogenesis","17/304","482/18866",0.00221498208045085,0.00221498208045085,0.262777563307271,"BMP7/CREB1/DBN1/ENAH/EPHA4/EXT1/FN1/FYN/IRS2/POU3F2/RAPH1/S100A6/SEMA5A/SKIL/SLIT2/SPP1/ZSWIM6",17
GO:0060760,"GO:0060760","positive regulation of response to cytokine stimulus","5/304","57/18866",0.00221907859893818,0.00221907859893818,0.262777563307271,"EDN1/MED1/PRKN/RIPK2/TRIM6",5
GO:0035729,"GO:0035729","cellular response to hepatocyte growth factor stimulus","3/304","17/18866",0.00238246954588377,0.00238246954588377,0.262777563307271,"CREB1/GCLC/MED1",3
GO:0043687,"GO:0043687","post-translational protein modification","14/304","363/18866",0.00239494479820905,0.00239494479820905,0.262777563307271,"AGTPBP1/ATG5/F5/FBN1/FBXL13/FBXO27/FBXW11/FN1/IGFBP7/KCTD7/LAMC1/MIA3/SPP1/VCAN",14
GO:0072593,"GO:0072593","reactive oxygen species metabolic process","12/304","288/18866",0.00257767763879591,0.00257767763879591,0.262777563307271,"ASS1/ATG5/BMP7/BNIP3/EDN1/FOXO3/FYN/GCH1/PDK4/PRKN/STK17A/WDR35",12
GO:0006023,"GO:0006023","aminoglycan biosynthetic process","7/304","115/18866",0.0026200604759424,0.0026200604759424,0.262777563307271,"B4GAT1/CHST6/CHSY3/EXT1/GPC5/ST3GAL1/VCAN",7
GO:0046394,"GO:0046394","carboxylic acid biosynthetic process","14/304","367/18866",0.00264484756735089,0.00264484756735089,0.262777563307271,"ASL/ASS1/DPYD/EDN1/ELOVL7/FABP5/FGFR4/GCH1/HACD1/INSIG1/PDK4/QKI/STARD4/VCAN",14
GO:0071560,"GO:0071560","cellular response to transforming growth factor beta stimulus","11/304","252/18866",0.00269429485959109,0.00269429485959109,0.262777563307271,"CD109/CREB1/EDN1/FBN1/FYN/JUN/SKIL/SMAD7/SMURF2/TGFB1I1/YES1",11
GO:0016053,"GO:0016053","organic acid biosynthetic process","14/304","368/18866",0.00271056932636835,0.00271056932636835,0.262777563307271,"ASL/ASS1/DPYD/EDN1/ELOVL7/FABP5/FGFR4/GCH1/HACD1/INSIG1/PDK4/QKI/STARD4/VCAN",14
GO:0010976,"GO:0010976","positive regulation of neuron projection development","12/304","290/18866",0.00272726255239524,0.00272726255239524,0.262777563307271,"BMP7/DBN1/EPHA4/FN1/FYN/PRKN/SEMA5A/SHANK2/SKIL/SLIT2/TENM3/UNC13A",12
GO:0030512,"GO:0030512","negative regulation of transforming growth factor beta receptor signaling pathway","6/304","87/18866",0.00282225049950891,0.00282225049950891,0.262777563307271,"CD109/FBN1/SKIL/SMAD7/SMURF2/TGFB1I1",6
GO:0019318,"GO:0019318","hexose metabolic process","11/304","254/18866",0.00286266003149055,0.00286266003149055,0.262777563307271,"BPGM/FABP5/FOXA2/INPPL1/IRS2/KAT2B/PDK4/PRKN/SLC25A13/SLC35B4/SORBS1",11
GO:0007623,"GO:0007623","circadian rhythm","10/304","218/18866",0.00291505297283704,0.00291505297283704,0.262777563307271,"ASS1/CAVIN3/CCAR2/CREB1/FBXW11/GPR176/HNF4A/JUN/RBM4B/RORB",10
GO:0001892,"GO:0001892","embryonic placenta development","6/304","89/18866",0.00316226630208734,0.00316226630208734,0.262777563307271,"BMP7/FZD5/HEY1/MED1/PLCD1/PLK4",6
GO:1903845,"GO:1903845","negative regulation of cellular response to transforming growth factor beta stimulus","6/304","89/18866",0.00316226630208734,0.00316226630208734,0.262777563307271,"CD109/FBN1/SKIL/SMAD7/SMURF2/TGFB1I1",6
GO:0005996,"GO:0005996","monosaccharide metabolic process","12/304","296/18866",0.00321889065790454,0.00321889065790454,0.262777563307271,"BPGM/FABP5/FOXA2/GCLC/INPPL1/IRS2/KAT2B/PDK4/PRKN/SLC25A13/SLC35B4/SORBS1",12
GO:0071559,"GO:0071559","response to transforming growth factor beta","11/304","258/18866",0.00322483986310152,0.00322483986310152,0.262777563307271,"CD109/CREB1/EDN1/FBN1/FYN/JUN/SKIL/SMAD7/SMURF2/TGFB1I1/YES1",11
GO:0050770,"GO:0050770","regulation of axonogenesis","9/304","186/18866",0.00327778181321756,0.00327778181321756,0.262777563307271,"DBN1/EPHA4/FN1/POU3F2/SEMA5A/SKIL/SLIT2/SPP1/ZSWIM6",9
GO:0035728,"GO:0035728","response to hepatocyte growth factor","3/304","19/18866",0.00331515239688142,0.00331515239688142,0.262777563307271,"CREB1/GCLC/MED1",3
GO:0010906,"GO:0010906","regulation of glucose metabolic process","7/304","121/18866",0.00348092692701304,0.00348092692701304,0.269646923197804,"FOXA2/IRS2/KAT2B/PDK4/PRKN/SLC35B4/SORBS1",7
GO:0003018,"GO:0003018","vascular process in circulatory system","9/304","190/18866",0.00377155085231353,0.00377155085231353,0.285572855957557,"ATG5/EDN1/FABP5/GCH1/GCLC/KCNMB4/SLIT2/WDR35/YES1",9
GO:0010042,"GO:0010042","response to manganese ion","3/304","20/18866",0.00385408703068105,0.00385408703068105,0.285572855957557,"ATP13A2/BACE1/PRKN",3
GO:0008637,"GO:0008637","apoptotic mitochondrial changes","7/304","125/18866",0.00416444080265059,0.00416444080265059,0.290622756126716,"BNIP3/CCAR2/GCLC/JUN/PRKN/WDR35/YWHAZ",7
GO:0089718,"GO:0089718","amino acid import across plasma membrane","4/304","41/18866",0.00418720951606706,0.00418720951606706,0.290622756126716,"RGS4/SLC22A4/SLC36A4/SLC43A1",4
GO:2000378,"GO:2000378","negative regulation of reactive oxygen species metabolic process","5/304","66/18866",0.00421258096680991,0.00421258096680991,0.290622756126716,"ATG5/BNIP3/FYN/PRKN/WDR35",5
GO:0048738,"GO:0048738","cardiac muscle tissue development","10/304","231/18866",0.00439165843539927,0.00439165843539927,0.290622756126716,"ATG5/BMP7/CREB1/CXADR/EDN1/GLI1/MED1/PKP2/RGS4/SMAD7",10
GO:0090596,"GO:0090596","sensory organ morphogenesis","11/304","269/18866",0.00441369907428252,0.00441369907428252,0.290622756126716,"AGTPBP1/BMP7/EDN1/FBN1/FZD5/INSIG1/MAFB/RORB/SOBP/TENM3/WHRN",11
GO:0060716,"GO:0060716","labyrinthine layer blood vessel development","3/304","21/18866",0.00444333926126425,0.00444333926126425,0.290622756126716,"FZD5/HEY1/PLCD1",3
GO:0030900,"GO:0030900","forebrain development","14/304","391/18866",0.00463480435847563,0.00463480435847563,0.290622756126716,"AGTPBP1/BNIP3/CREB1/DIXDC1/EXT1/FYN/GDPD5/GLI1/NRGN/PHLPP2/POU3F2/SEMA5A/SLIT2/ZSWIM6",14
GO:1903146,"GO:1903146","regulation of autophagy of mitochondrion","4/304","43/18866",0.00497611939277557,0.00497611939277557,0.290622756126716,"ATP13A2/BNIP3/FZD5/PRKN",4
GO:0045927,"GO:0045927","positive regulation of growth","11/304","274/18866",0.00505825295764716,0.00505825295764716,0.290622756126716,"CREB1/DBN1/EDN1/FN1/GLI1/POU3F2/PRKN/SEMA5A/SMAD7/UNC13A/YBX3",11
GO:0036120,"GO:0036120","cellular response to platelet-derived growth factor stimulus","3/304","22/18866",0.00508421555301449,0.00508421555301449,0.290622756126716,"CREB1/FYN/YES1",3
GO:0042391,"GO:0042391","regulation of membrane potential","15/304","443/18866",0.00571583697599711,0.00571583697599711,0.290622756126716,"BNIP3/CXADR/EDN1/GCLC/JUN/KCNH3/KCNMB4/KCTD7/PKP2/PPA2/PRKN/RGS4/SCN9A/SHANK2/SMAD7",15
GO:0036119,"GO:0036119","response to platelet-derived growth factor","3/304","23/18866",0.00577791890610923,0.00577791890610923,0.290622756126716,"CREB1/FYN/YES1",3
GO:2000810,"GO:2000810","regulation of bicellular tight junction assembly","3/304","23/18866",0.00577791890610923,0.00577791890610923,0.290622756126716,"CLDN3/FZD5/MYO1C",3
GO:0043090,"GO:0043090","amino acid import","4/304","45/18866",0.00585896800502797,0.00585896800502797,0.290622756126716,"RGS4/SLC22A4/SLC36A4/SLC43A1",4
GO:1904646,"GO:1904646","cellular response to amyloid-beta","4/304","45/18866",0.00585896800502797,0.00585896800502797,0.290622756126716,"BACE1/EPHA4/FOXO3/FYN",4
GO:0042157,"GO:0042157","lipoprotein metabolic process","7/304","135/18866",0.00631605311751836,0.00631605311751836,0.290622756126716,"ATG10/ATG5/DBI/LDLR/LYPLA1/LYPLAL1/PIGM",7
GO:0000959,"GO:0000959","mitochondrial RNA metabolic process","4/304","46/18866",0.00633707505213546,0.00633707505213546,0.290622756126716,"DARS2/FOXO3/MTERF1/PDE12",4
GO:0032868,"GO:0032868","response to insulin","11/304","283/18866",0.00640452790359157,0.00640452790359157,0.290622756126716,"FOXO3/GCLC/GGH/INPPL1/INSIG1/IRS2/KAT2B/MYO1C/PDK4/SORBS1/TNS2",11
GO:0090114,"GO:0090114","COPII-coated vesicle budding","5/304","73/18866",0.0064652355950356,0.0064652355950356,0.290622756126716,"F5/F8/INSIG1/MIA3/TRAPPC6B",5
GO:0032891,"GO:0032891","negative regulation of organic acid transport","3/304","24/18866",0.0065255525964803,0.0065255525964803,0.290622756126716,"IRS2/RGS4/SLC43A1",3
GO:0046890,"GO:0046890","regulation of lipid biosynthetic process","9/304","207/18866",0.00655250301825687,0.00655250301825687,0.290622756126716,"CREB1/FABP5/FGFR4/IGFBP7/INSIG1/LDLR/PDK4/SORBS1/STARD4",9
GO:0072330,"GO:0072330","monocarboxylic acid biosynthetic process","10/304","246/18866",0.00676821247039735,0.00676821247039735,0.290622756126716,"EDN1/ELOVL7/FABP5/FGFR4/HACD1/INSIG1/PDK4/QKI/STARD4/VCAN",10
GO:0009896,"GO:0009896","positive regulation of catabolic process","15/304","454/18866",0.00710201379104705,0.00710201379104705,0.290622756126716,"ATG5/BNIP3/FOXO3/GCLC/IRS2/LDLR/PRKN/PTTG1IP/RIPK2/RNF19B/SMAD7/SMURF2/TIPARP/TRIM6/USP13",15
GO:0001503,"GO:0001503","ossification","14/304","412/18866",0.00724252179223066,0.00724252179223066,0.290622756126716,"BMP7/EXT1/GLI1/INPPL1/ITGA11/KREMEN2/NAB2/RANBP3L/RIOX1/RORB/RRBP1/SMAD7/SPP1/VCAN",14
GO:0045862,"GO:0045862","positive regulation of proteolysis","13/304","370/18866",0.00728248940438272,0.00728248940438272,0.290622756126716,"CLDN3/EPHA4/FBXW11/FGFR4/FN1/FYN/GCLC/PRKN/RIPK2/RNF19B/SMAD7/USP13/WDR35",13
GO:0010799,"GO:0010799","regulation of peptidyl-threonine phosphorylation","4/304","48/18866",0.00736944192996148,0.00736944192996148,0.290622756126716,"BMP7/RIPK2/SMAD7/TRIM6",4
GO:0046928,"GO:0046928","regulation of neurotransmitter secretion","6/304","106/18866",0.00740611254573873,0.00740611254573873,0.290622756126716,"BACE1/KCNMB4/PRKN/SYT12/UNC13A/VAMP1",6
GO:0007254,"GO:0007254","JNK cascade","9/304","213/18866",0.00784056582793713,0.00784056582793713,0.290622756126716,"ANKRD6/EDAR/EDN1/EPHA4/FZD5/PRKN/RIPK2/SH2D3A/ULK4",9
GO:0010639,"GO:0010639","negative regulation of organelle organization","14/304","416/18866",0.00785127943991194,0.00785127943991194,0.290622756126716,"ARHGAP28/ATG5/BMP7/BNIP3/DYNC1LI1/GCLC/INSIG1/KAT2B/ODF2L/PICK1/PLEKHH2/PRKN/SLIT2/TPX2",14
GO:0008202,"GO:0008202","steroid metabolic process","12/304","332/18866",0.00787659402995155,0.00787659402995155,0.290622756126716,"CYP3A5/FDX1/FGFR4/IGFBP7/INSIG1/LDLR/LIPA/MED1/SPP1/STARD3NL/STARD4/TIPARP",12
GO:0060711,"GO:0060711","labyrinthine layer development","4/304","49/18866",0.00792477226106428,0.00792477226106428,0.290622756126716,"BMP7/FZD5/HEY1/PLCD1",4
GO:0061383,"GO:0061383","trabecula morphogenesis","4/304","49/18866",0.00792477226106428,0.00792477226106428,0.290622756126716,"BMP7/HEY1/MED1/SLC40A1",4
GO:0044262,"GO:0044262","cellular carbohydrate metabolic process","11/304","294/18866",0.00841525821046313,0.00841525821046313,0.290622756126716,"BRAF/EXT1/FOXA2/GYG1/IRS2/KAT2B/MYOF/PDK4/PRKN/SLC35B4/SORBS1",11
GO:0060271,"GO:0060271","cilium assembly","13/304","377/18866",0.00845072585196843,0.00845072585196843,0.290622756126716,"ABLIM3/ATG5/CEP57/CETN2/DZIP1L/KIF3C/ODF2L/PLK4/RSPH4A/SPAG1/SPATA6/SSX2IP/WDR35",13
GO:0006900,"GO:0006900","vesicle budding from membrane","6/304","110/18866",0.00881905709166778,0.00881905709166778,0.290622756126716,"F5/F8/INSIG1/MIA3/PRKN/TRAPPC6B",6
GO:1904659,"GO:1904659","glucose transmembrane transport","6/304","110/18866",0.00881905709166778,0.00881905709166778,0.290622756126716,"BRAF/EDN1/FABP5/IRS2/SORBS1/YES1",6
GO:0000422,"GO:0000422","autophagy of mitochondrion","5/304","79/18866",0.00897607595339366,0.00897607595339366,0.290622756126716,"ATG5/ATP13A2/BNIP3/FZD5/PRKN",5
GO:0061726,"GO:0061726","mitochondrion disassembly","5/304","79/18866",0.00897607595339366,0.00897607595339366,0.290622756126716,"ATG5/ATP13A2/BNIP3/FZD5/PRKN",5
GO:0045666,"GO:0045666","positive regulation of neuron differentiation","13/304","380/18866",0.00899447604396893,0.00899447604396893,0.290622756126716,"BMP7/DBN1/EPHA4/FN1/FYN/GDPD5/PRKN/SEMA5A/SHANK2/SKIL/SLIT2/TENM3/UNC13A",13
GO:0060070,"GO:0060070","canonical Wnt signaling pathway","12/304","339/18866",0.00920829055487609,0.00920829055487609,0.290622756126716,"ANKRD6/BICC1/CCAR2/DIXDC1/FOXO3/FZD5/GLI1/GPC5/KREMEN2/PRKN/SEMA5A/SMURF2",12
GO:0030514,"GO:0030514","negative regulation of BMP signaling pathway","4/304","52/18866",0.00975345063508524,0.00975345063508524,0.290622756126716,"FBN1/SKIL/SMAD7/SMURF2",4
GO:1903362,"GO:1903362","regulation of cellular protein catabolic process","10/304","260/18866",0.00979045418672226,0.00979045418672226,0.290622756126716,"ATP13A2/CCAR2/EPHA4/GCLC/LDLR/PRKN/PTTG1IP/RNF19B/SMAD7/USP13",10
GO:0008154,"GO:0008154","actin polymerization or depolymerization","9/304","221/18866",0.00984800585459124,0.00984800585459124,0.290622756126716,"ARHGAP28/DBN1/ENAH/MYO1C/PICK1/PLEKHH2/SEMA5A/SLIT2/WASHC3",9
GO:0051592,"GO:0051592","response to calcium ion","7/304","147/18866",0.00988163701313243,0.00988163701313243,0.290622756126716,"BRAF/EDN1/JUN/KCNMB4/SLC25A13/SYT12/TRPC1",7
GO:0048194,"GO:0048194","Golgi vesicle budding","5/304","81/18866",0.00994408726099381,0.00994408726099381,0.290622756126716,"F5/F8/INSIG1/MIA3/TRAPPC6B",5
GO:0010721,"GO:0010721","negative regulation of cell development","12/304","343/18866",0.0100444108017823,0.0100444108017823,0.290622756126716,"BMP7/DIXDC1/EPHA4/FBN1/FOXO3/HEY1/LDLR/MED1/RGS4/SEMA5A/SLIT2/SPP1",12
GO:0006929,"GO:0006929","substrate-dependent cell migration","3/304","28/18866",0.0100741666192465,0.0100741666192465,0.290622756126716,"FN1/ITGA11/SLIT2",3
GO:0010460,"GO:0010460","positive regulation of heart rate","3/304","28/18866",0.0100741666192465,0.0100741666192465,0.290622756126716,"EDN1/GCH1/RGS4",3
GO:0018146,"GO:0018146","keratan sulfate biosynthetic process","3/304","28/18866",0.0100741666192465,0.0100741666192465,0.290622756126716,"B4GAT1/CHST6/ST3GAL1",3
GO:0046328,"GO:0046328","regulation of JNK cascade","8/304","184/18866",0.010112586922663,0.010112586922663,0.290622756126716,"ANKRD6/EDAR/EDN1/EPHA4/FZD5/PRKN/RIPK2/ULK4",8
GO:0031667,"GO:0031667","response to nutrient levels","15/304","473/18866",0.0101210057037025,0.0101210057037025,0.290622756126716,"ASS1/ATG5/BMP7/BNIP3/ENSA/FOXA2/FOXO3/GCLC/JUN/LDLR/MED1/PDK4/PICK1/SPP1/TBL2",15
GO:0050890,"GO:0050890","cognition","11/304","302/18866",0.0101623116307427,0.0101623116307427,0.290622756126716,"CAMK4/CBR3/CREB1/FYN/GM2A/JUN/LDLR/NRGN/PRKN/SHANK2/SOBP",11
GO:0010675,"GO:0010675","regulation of cellular carbohydrate metabolic process","7/304","148/18866",0.0102337011000474,0.0102337011000474,0.290622756126716,"FOXA2/IRS2/KAT2B/PDK4/PRKN/SLC35B4/SORBS1",7
GO:0008645,"GO:0008645","hexose transmembrane transport","6/304","114/18866",0.0104153224528133,0.0104153224528133,0.290622756126716,"BRAF/EDN1/FABP5/IRS2/SORBS1/YES1",6
GO:0035384,"GO:0035384","thioester biosynthetic process","4/304","53/18866",0.0104188413164035,0.0104188413164035,0.290622756126716,"ELOVL7/HACD1/PDK4/PDP1",4
GO:0071616,"GO:0071616","acyl-CoA biosynthetic process","4/304","53/18866",0.0104188413164035,0.0104188413164035,0.290622756126716,"ELOVL7/HACD1/PDK4/PDP1",4
GO:1903533,"GO:1903533","regulation of protein targeting","5/304","82/18866",0.0104539617565891,0.0104539617565891,0.290622756126716,"ABLIM3/FYN/FZD5/MYO1C/PRKN",5
GO:0019216,"GO:0019216","regulation of lipid metabolic process","14/304","431/18866",0.0105047720401036,0.0105047720401036,0.290622756126716,"CREB1/FABP5/FGFR4/HNF4A/IGFBP7/INSIG1/IRS2/LDLR/MED1/PDK4/PDP1/PPP2R5A/SORBS1/STARD4",14
GO:1903364,"GO:1903364","positive regulation of cellular protein catabolic process","7/304","149/18866",0.0105948188674857,0.0105948188674857,0.290622756126716,"GCLC/LDLR/PRKN/PTTG1IP/RNF19B/SMAD7/USP13",7
GO:0010944,"GO:0010944","negative regulation of transcription by competitive promoter binding","2/304","10/18866",0.0106926143539825,0.0106926143539825,0.290622756126716,"CREB1/SMAD7",2
GO:0010992,"GO:0010992","ubiquitin recycling","2/304","10/18866",0.0106926143539825,0.0106926143539825,0.290622756126716,"PRKN/TRIM6",2
GO:0033131,"GO:0033131","regulation of glucokinase activity","2/304","10/18866",0.0106926143539825,0.0106926143539825,0.290622756126716,"FOXA2/PRKN",2
GO:0035376,"GO:0035376","sterol import","2/304","10/18866",0.0106926143539825,0.0106926143539825,0.290622756126716,"LDLR/STARD4",2
GO:0051409,"GO:0051409","response to nitrosative stress","2/304","10/18866",0.0106926143539825,0.0106926143539825,0.290622756126716,"ATG5/GCLC",2
GO:0070099,"GO:0070099","regulation of chemokine-mediated signaling pathway","2/304","10/18866",0.0106926143539825,0.0106926143539825,0.290622756126716,"EDN1/SLIT2",2
GO:0070508,"GO:0070508","cholesterol import","2/304","10/18866",0.0106926143539825,0.0106926143539825,0.290622756126716,"LDLR/STARD4",2
GO:1904672,"GO:1904672","regulation of somatic stem cell population maintenance","2/304","10/18866",0.0106926143539825,0.0106926143539825,0.290622756126716,"BMP7/LBH",2
GO:1905039,"GO:1905039","carboxylic acid transmembrane transport","7/304","150/18866",0.0109651178112138,0.0109651178112138,0.290622756126716,"IRS2/RGS4/SLC16A3/SLC22A4/SLC25A13/SLC36A4/SLC43A1",7
GO:0045665,"GO:0045665","negative regulation of neuron differentiation","9/304","225/18866",0.0109864790773939,0.0109864790773939,0.290622756126716,"BMP7/DIXDC1/EPHA4/FOXO3/HEY1/MED1/SEMA5A/SLIT2/SPP1",9
GO:0045732,"GO:0045732","positive regulation of protein catabolic process","9/304","225/18866",0.0109864790773939,0.0109864790773939,0.290622756126716,"GCLC/LDLR/PRKN/PTTG1IP/RNF19B/SMAD7/SMURF2/TIPARP/USP13",9
GO:0031331,"GO:0031331","positive regulation of cellular catabolic process","13/304","390/18866",0.011007807775268,0.011007807775268,0.290622756126716,"ATG5/BNIP3/FOXO3/GCLC/IRS2/LDLR/PRKN/PTTG1IP/RIPK2/RNF19B/SMAD7/TRIM6/USP13",13
GO:0008209,"GO:0008209","androgen metabolic process","3/304","29/18866",0.0111047595805981,0.0111047595805981,0.290622756126716,"MED1/SPP1/TIPARP",3
GO:0007015,"GO:0007015","actin filament organization","14/304","434/18866",0.0111112620165917,0.0111112620165917,0.290622756126716,"ARHGAP28/DBN1/ENAH/INPPL1/MYO1C/MYO5B/PICK1/PLEKHH2/PRKN/RGS4/SEMA5A/SLIT2/SORBS1/WASHC3",14
GO:0010043,"GO:0010043","response to zinc ion","4/304","54/18866",0.0111129082033561,0.0111129082033561,0.290622756126716,"ASS1/ATP13A2/CREB1/GGH",4
GO:0015749,"GO:0015749","monosaccharide transmembrane transport","6/304","116/18866",0.0112858914492137,0.0112858914492137,0.290622756126716,"BRAF/EDN1/FABP5/IRS2/SORBS1/YES1",6
GO:0032869,"GO:0032869","cellular response to insulin stimulus","9/304","226/18866",0.0112859231456958,0.0112859231456958,0.290622756126716,"FOXO3/GCLC/INSIG1/IRS2/KAT2B/MYO1C/PDK4/SORBS1/TNS2",9
GO:0008643,"GO:0008643","carbohydrate transport","7/304","151/18866",0.0113447248455543,0.0113447248455543,0.290622756126716,"BRAF/EDN1/FABP5/IRS2/SLC35B4/SORBS1/YES1",7
GO:1903825,"GO:1903825","organic acid transmembrane transport","7/304","151/18866",0.0113447248455543,0.0113447248455543,0.290622756126716,"IRS2/RGS4/SLC16A3/SLC22A4/SLC25A13/SLC36A4/SLC43A1",7
GO:0030279,"GO:0030279","negative regulation of ossification","5/304","84/18866",0.0115268272381284,0.0115268272381284,0.290622756126716,"KREMEN2/RANBP3L/RIOX1/RORB/SMAD7",5
GO:0097061,"GO:0097061","dendritic spine organization","5/304","84/18866",0.0115268272381284,0.0115268272381284,0.290622756126716,"DBN1/EPHA4/FYN/PICK1/SHANK2",5
GO:0051341,"GO:0051341","regulation of oxidoreductase activity","6/304","117/18866",0.0117399170638978,0.0117399170638978,0.290622756126716,"EDN1/GCH1/LYPLA1/PDK4/PDP1/PRKN",6
GO:0016202,"GO:0016202","regulation of striated muscle tissue development","7/304","153/18866",0.012132367666882,0.012132367666882,0.290622756126716,"CREB1/CXADR/EDN1/GLI1/MRTFB/RGS4/YBX3",7
GO:0090287,"GO:0090287","regulation of cellular response to growth factor stimulus","11/304","310/18866",0.0121760446408237,0.0121760446408237,0.290622756126716,"ADAMTS3/CD109/FBN1/MYO1C/MYOF/SKIL/SLIT2/SMAD7/SMURF2/TGFB1I1/UBE2O",11
GO:0010800,"GO:0010800","positive regulation of peptidyl-threonine phosphorylation","3/304","30/18866",0.0121940048658164,0.0121940048658164,0.290622756126716,"BMP7/RIPK2/TRIM6",3
GO:0034219,"GO:0034219","carbohydrate transmembrane transport","6/304","118/18866",0.0122066731547631,0.0122066731547631,0.290622756126716,"BRAF/EDN1/FABP5/IRS2/SORBS1/YES1",6
GO:0048762,"GO:0048762","mesenchymal cell differentiation","9/304","229/18866",0.0122210005992884,0.0122210005992884,0.290622756126716,"BMP7/EDN1/FN1/FOXA2/HEY1/RANBP3L/SEMA5A/SMAD7/TGFB1I1",9
GO:0010821,"GO:0010821","regulation of mitochondrion organization","8/304","191/18866",0.0124655028412397,0.0124655028412397,0.290622756126716,"ABLIM3/ATP13A2/BNIP3/FZD5/GCLC/PRKN/WDR35/YWHAZ",8
GO:0048167,"GO:0048167","regulation of synaptic plasticity","8/304","191/18866",0.0124655028412397,0.0124655028412397,0.290622756126716,"CREB1/DBN1/EPHA4/NRGN/PICK1/SHANK2/SYT12/UNC13A",8
GO:1904645,"GO:1904645","response to amyloid-beta","4/304","56/18866",0.0125887807576024,0.0125887807576024,0.290622756126716,"BACE1/EPHA4/FOXO3/FYN",4
GO:0042176,"GO:0042176","regulation of protein catabolic process","13/304","397/18866",0.0126141672947491,0.0126141672947491,0.290622756126716,"ATP13A2/CCAR2/EPHA4/FYN/GCLC/LDLR/PRKN/PTTG1IP/RNF19B/SMAD7/SMURF2/TIPARP/USP13",13
GO:0044782,"GO:0044782","cilium organization","13/304","397/18866",0.0126141672947491,0.0126141672947491,0.290622756126716,"ABLIM3/ATG5/CEP57/CETN2/DZIP1L/KIF3C/ODF2L/PLK4/RSPH4A/SPAG1/SPATA6/SSX2IP/WDR35",13
GO:0009791,"GO:0009791","post-embryonic development","5/304","86/18866",0.012672298085359,0.012672298085359,0.290622756126716,"FBN1/FZD5/INPPL1/SCN9A/TIPARP",5
GO:0050772,"GO:0050772","positive regulation of axonogenesis","5/304","86/18866",0.012672298085359,0.012672298085359,0.290622756126716,"DBN1/FN1/SEMA5A/SKIL/SLIT2",5
GO:0010822,"GO:0010822","positive regulation of mitochondrion organization","6/304","119/18866",0.0126863347896668,0.0126863347896668,0.290622756126716,"ABLIM3/BNIP3/FZD5/PRKN/WDR35/YWHAZ",6
GO:0001649,"GO:0001649","osteoblast differentiation","9/304","231/18866",0.0128757315473255,0.0128757315473255,0.290622756126716,"BMP7/GLI1/ITGA11/RANBP3L/RIOX1/RORB/RRBP1/SPP1/VCAN",9
GO:0000050,"GO:0000050","urea cycle","2/304","11/18866",0.0129307422955001,0.0129307422955001,0.290622756126716,"ASL/ASS1",2
GO:0031915,"GO:0031915","positive regulation of synaptic plasticity","2/304","11/18866",0.0129307422955001,0.0129307422955001,0.290622756126716,"DBN1/UNC13A",2
GO:0070213,"GO:0070213","protein auto-ADP-ribosylation","2/304","11/18866",0.0129307422955001,0.0129307422955001,0.290622756126716,"PARP8/TIPARP",2
GO:1902065,"GO:1902065","response to L-glutamate","2/304","11/18866",0.0129307422955001,0.0129307422955001,0.290622756126716,"CREB1/FYN",2
GO:1903299,"GO:1903299","regulation of hexokinase activity","2/304","11/18866",0.0129307422955001,0.0129307422955001,0.290622756126716,"FOXA2/PRKN",2
GO:1904350,"GO:1904350","regulation of protein catabolic process in the vacuole","2/304","11/18866",0.0129307422955001,0.0129307422955001,0.290622756126716,"ATP13A2/LDLR",2
GO:0051588,"GO:0051588","regulation of neurotransmitter transport","6/304","120/18866",0.0131790751592502,0.0131790751592502,0.290622756126716,"BACE1/KCNMB4/PRKN/SYT12/UNC13A/VAMP1",6
GO:0006890,"GO:0006890","retrograde vesicle-mediated transport, Golgi to endoplasmic reticulum","5/304","87/18866",0.0132729107430328,0.0132729107430328,0.290622756126716,"COPG2/ERGIC1/KIF3C/PICK1/RAB33B",5
GO:0060291,"GO:0060291","long-term synaptic potentiation","5/304","87/18866",0.0132729107430328,0.0132729107430328,0.290622756126716,"CREB1/EPHA4/NRGN/SHANK2/SYT12",5
GO:0021772,"GO:0021772","olfactory bulb development","3/304","31/18866",0.0133424039057355,0.0133424039057355,0.290622756126716,"AGTPBP1/EXT1/SLIT2",3
GO:0050974,"GO:0050974","detection of mechanical stimulus involved in sensory perception","3/304","31/18866",0.0133424039057355,0.0133424039057355,0.290622756126716,"BACE1/FYN/WHRN",3
GO:0060325,"GO:0060325","face morphogenesis","3/304","31/18866",0.0133424039057355,0.0133424039057355,0.290622756126716,"CRISPLD1/CRISPLD2/TIPARP",3
GO:1903792,"GO:1903792","negative regulation of anion transport","3/304","31/18866",0.0133424039057355,0.0133424039057355,0.290622756126716,"IRS2/RGS4/SLC43A1",3
GO:0001890,"GO:0001890","placenta development","7/304","156/18866",0.0133867770464174,0.0133867770464174,0.290622756126716,"BMP7/FZD5/HEY1/MED1/PLCD1/PLK4/SPP1",7
GO:1901861,"GO:1901861","regulation of muscle tissue development","7/304","156/18866",0.0133867770464174,0.0133867770464174,0.290622756126716,"CREB1/CXADR/EDN1/GLI1/MRTFB/RGS4/YBX3",7
GO:1902904,"GO:1902904","negative regulation of supramolecular fiber organization","7/304","156/18866",0.0133867770464174,0.0133867770464174,0.290622756126716,"ARHGAP28/LDLR/PICK1/PLEKHH2/PRKN/SLIT2/TPX2",7
GO:0048634,"GO:0048634","regulation of muscle organ development","7/304","157/18866",0.0138248596507536,0.0138248596507536,0.293572545612953,"CREB1/CXADR/EDN1/GLI1/MRTFB/RGS4/YBX3",7
GO:0098739,"GO:0098739","import across plasma membrane","7/304","157/18866",0.0138248596507536,0.0138248596507536,0.293572545612953,"FXYD2/FYN/IRS2/RGS4/SLC22A4/SLC36A4/SLC43A1",7
GO:0097305,"GO:0097305","response to alcohol","9/304","234/18866",0.0139062909226875,0.0139062909226875,0.293572545612953,"ADCY7/CLDN3/FDX1/FOXO3/FYN/GGH/IGFBP7/RGS4/SLIT2",9
GO:1905475,"GO:1905475","regulation of protein localization to membrane","8/304","195/18866",0.0139782985947989,0.0139782985947989,0.293572545612953,"FYN/GPC5/LYPLA1/MYO1C/PPP2R5A/PRKN/SORBS1/YWHAZ",8
GO:0042752,"GO:0042752","regulation of circadian rhythm","6/304","122/18866",0.0142044750297378,0.0142044750297378,0.293572545612953,"CCAR2/CREB1/FBXW11/HNF4A/RBM4B/RORB",6
GO:0045444,"GO:0045444","fat cell differentiation","9/304","235/18866",0.0142630214896173,0.0142630214896173,0.293572545612953,"BMP7/BNIP3/CCDC71L/CREB1/ERO1A/INSIG1/MAFB/MED1/TGFB1I1",9
GO:0030203,"GO:0030203","glycosaminoglycan metabolic process","7/304","158/18866",0.0142731187402214,0.0142731187402214,0.293572545612953,"B4GAT1/CHST6/CHSY3/EXT1/GPC5/ST3GAL1/VCAN",7
GO:1903959,"GO:1903959","regulation of anion transmembrane transport","3/304","32/18866",0.014550384759395,0.014550384759395,0.293572545612953,"IRS2/RGS4/SLC43A1",3
GO:0060560,"GO:0060560","developmental growth involved in morphogenesis","9/304","236/18866",0.0146264765865244,0.0146264765865244,0.293572545612953,"DBN1/FN1/MED1/PRKN/RAPH1/SEMA5A/SLIT2/SPP1/UNC13A",9
GO:0051961,"GO:0051961","negative regulation of nervous system development","11/304","319/18866",0.0147904537477777,0.0147904537477777,0.293572545612953,"BMP7/DIXDC1/EPHA4/FOXO3/GPR161/HEY1/LDLR/MED1/SEMA5A/SLIT2/SPP1",11
GO:0046777,"GO:0046777","protein autophosphorylation","9/304","237/18866",0.0149967273638084,0.0149967273638084,0.293572545612953,"ATP13A2/CAMK4/EPHA4/FGFR4/FYN/JUN/PPP2R5A/PPP2R5E/YES1",9
GO:0007517,"GO:0007517","muscle organ development","13/304","407/18866",0.0152161957261205,0.0152161957261205,0.293572545612953,"ASS1/CREB1/CXADR/EDN1/GLI1/ITGA11/MED1/MRTFB/PKP2/RGS4/SGCE/SMAD7/YBX3",13
GO:0031581,"GO:0031581","hemidesmosome assembly","2/304","12/18866",0.0153532501962624,0.0153532501962624,0.293572545612953,"CD151/LAMC1",2
GO:0070857,"GO:0070857","regulation of bile acid biosynthetic process","2/304","12/18866",0.0153532501962624,0.0153532501962624,0.293572545612953,"FGFR4/STARD4",2
GO:0060537,"GO:0060537","muscle tissue development","13/304","409/18866",0.0157825514962637,0.0157825514962637,0.293572545612953,"ATG5/BMP7/CREB1/CXADR/EDN1/GLI1/MED1/MRTFB/PKP2/RGS4/SMAD7/TIPARP/YBX3",13
GO:0021696,"GO:0021696","cerebellar cortex morphogenesis","3/304","33/18866",0.0158183049978785,0.0158183049978785,0.293572545612953,"AGTPBP1/GLI1/WHRN",3
GO:0021988,"GO:0021988","olfactory lobe development","3/304","33/18866",0.0158183049978785,0.0158183049978785,0.293572545612953,"AGTPBP1/EXT1/SLIT2",3
GO:0042339,"GO:0042339","keratan sulfate metabolic process","3/304","33/18866",0.0158183049978785,0.0158183049978785,0.293572545612953,"B4GAT1/CHST6/ST3GAL1",3
GO:0051899,"GO:0051899","membrane depolarization","5/304","91/18866",0.0158670049873053,0.0158670049873053,0.293572545612953,"EDN1/GCLC/JUN/SCN9A/SMAD7",5
GO:0001836,"GO:0001836","release of cytochrome c from mitochondria","4/304","60/18866",0.0159025144947706,0.0159025144947706,0.293572545612953,"BNIP3/JUN/PRKN/WDR35",4
GO:0003333,"GO:0003333","amino acid transmembrane transport","5/304","92/18866",0.0165646268589295,0.0165646268589295,0.293572545612953,"RGS4/SLC22A4/SLC25A13/SLC36A4/SLC43A1",5
GO:0106027,"GO:0106027","neuron projection organization","5/304","92/18866",0.0165646268589295,0.0165646268589295,0.293572545612953,"DBN1/EPHA4/FYN/PICK1/SHANK2",5
GO:1900407,"GO:1900407","regulation of cellular response to oxidative stress","5/304","92/18866",0.0165646268589295,0.0165646268589295,0.293572545612953,"BMP7/FOXO3/FYN/GCH1/PRKN",5
GO:0051494,"GO:0051494","negative regulation of cytoskeleton organization","7/304","163/18866",0.016671250391758,0.016671250391758,0.293572545612953,"ARHGAP28/KAT2B/PICK1/PLEKHH2/PRKN/SLIT2/TPX2",7
GO:0043954,"GO:0043954","cellular component maintenance","4/304","61/18866",0.0168084638782713,0.0168084638782713,0.293572545612953,"CLDN3/FYN/PICK1/WHRN",4
GO:0007179,"GO:0007179","transforming growth factor beta receptor signaling pathway","8/304","202/18866",0.0169414265922506,0.0169414265922506,0.293572545612953,"CD109/CREB1/FBN1/JUN/SKIL/SMAD7/SMURF2/TGFB1I1",8
GO:0017015,"GO:0017015","regulation of transforming growth factor beta receptor signaling pathway","6/304","127/18866",0.017008582158118,0.017008582158118,0.293572545612953,"CD109/FBN1/SKIL/SMAD7/SMURF2/TGFB1I1",6
GO:0048854,"GO:0048854","brain morphogenesis","3/304","34/18866",0.0171464545044344,0.0171464545044344,0.293572545612953,"FBXW11/FOXO3/SHANK2",3
GO:0061384,"GO:0061384","heart trabecula morphogenesis","3/304","34/18866",0.0171464545044344,0.0171464545044344,0.293572545612953,"BMP7/HEY1/MED1",3
GO:0030510,"GO:0030510","regulation of BMP signaling pathway","5/304","93/18866",0.0172823432699231,0.0172823432699231,0.293572545612953,"FBN1/SKIL/SMAD7/SMURF2/UBE2O",5
GO:1903035,"GO:1903035","negative regulation of response to wounding","5/304","93/18866",0.0172823432699231,0.0172823432699231,0.293572545612953,"CD109/CLDN3/EDN1/EPHA4/SPP1",5
GO:1903409,"GO:1903409","reactive oxygen species biosynthetic process","6/304","128/18866",0.0176119379655991,0.0176119379655991,0.293572545612953,"ASS1/EDN1/FOXO3/FYN/GCH1/WDR35",6
GO:0006790,"GO:0006790","sulfur compound metabolic process","12/304","371/18866",0.0176568282809764,0.0176568282809764,0.293572545612953,"B4GAT1/CHST6/CHSY3/DBI/ELOVL7/GCLC/HACD1/MAT2B/PDK4/PDP1/ST3GAL1/VCAN",12
GO:0140053,"GO:0140053","mitochondrial gene expression","7/304","165/18866",0.0177058835485095,0.0177058835485095,0.293572545612953,"DARS2/FOXO3/MRPL19/MRPL50/MRPS7/MTERF1/RPUSD4",7
GO:0034113,"GO:0034113","heterotypic cell-cell adhesion","4/304","62/18866",0.0177460723589967,0.0177460723589967,0.293572545612953,"BMP7/CD58/CXADR/PKP2",4
GO:1902475,"GO:1902475","L-alpha-amino acid transmembrane transport","4/304","62/18866",0.0177460723589967,0.0177460723589967,0.293572545612953,"RGS4/SLC25A13/SLC36A4/SLC43A1",4
GO:0010635,"GO:0010635","regulation of mitochondrial fusion","2/304","13/18866",0.0179536552171372,0.0179536552171372,0.293572545612953,"BNIP3/PRKN",2
GO:0010958,"GO:0010958","regulation of amino acid import across plasma membrane","2/304","13/18866",0.0179536552171372,0.0179536552171372,0.293572545612953,"RGS4/SLC43A1",2
GO:0019627,"GO:0019627","urea metabolic process","2/304","13/18866",0.0179536552171372,0.0179536552171372,0.293572545612953,"ASL/ASS1",2
GO:0021694,"GO:0021694","cerebellar Purkinje cell layer formation","2/304","13/18866",0.0179536552171372,0.0179536552171372,0.293572545612953,"AGTPBP1/WHRN",2
GO:0030497,"GO:0030497","fatty acid elongation","2/304","13/18866",0.0179536552171372,0.0179536552171372,0.293572545612953,"ELOVL7/HACD1",2
GO:0042415,"GO:0042415","norepinephrine metabolic process","2/304","13/18866",0.0179536552171372,0.0179536552171372,0.293572545612953,"MOXD1/PRKN",2
GO:0042761,"GO:0042761","very long-chain fatty acid biosynthetic process","2/304","13/18866",0.0179536552171372,0.0179536552171372,0.293572545612953,"ELOVL7/HACD1",2
GO:0051956,"GO:0051956","negative regulation of amino acid transport","2/304","13/18866",0.0179536552171372,0.0179536552171372,0.293572545612953,"RGS4/SLC43A1",2
GO:0071941,"GO:0071941","nitrogen cycle metabolic process","2/304","13/18866",0.0179536552171372,0.0179536552171372,0.293572545612953,"ASL/ASS1",2
GO:0098734,"GO:0098734","macromolecule depalmitoylation","2/304","13/18866",0.0179536552171372,0.0179536552171372,0.293572545612953,"LYPLA1/LYPLAL1",2
GO:1903789,"GO:1903789","regulation of amino acid transmembrane transport","2/304","13/18866",0.0179536552171372,0.0179536552171372,0.293572545612953,"RGS4/SLC43A1",2
GO:1904424,"GO:1904424","regulation of GTP binding","2/304","13/18866",0.0179536552171372,0.0179536552171372,0.293572545612953,"ARHGAP28/EPHA4",2
GO:2000121,"GO:2000121","regulation of removal of superoxide radicals","2/304","13/18866",0.0179536552171372,0.0179536552171372,0.293572545612953,"BMP7/GCH1",2
GO:0051403,"GO:0051403","stress-activated MAPK cascade","10/304","286/18866",0.0180071059137245,0.0180071059137245,0.293572545612953,"ANKRD6/EDAR/EDN1/EPHA4/FBXW11/FZD5/PRKN/RIPK2/SH2D3A/ULK4",10
GO:0042593,"GO:0042593","glucose homeostasis","9/304","245/18866",0.0182118273016355,0.0182118273016355,0.293572545612953,"FABP5/FGFR4/FOXA2/FOXO3/GCLC/HNF4A/IRS2/PDK4/WDR35",9
GO:1903844,"GO:1903844","regulation of cellular response to transforming growth factor beta stimulus","6/304","129/18866",0.0182298348958464,0.0182298348958464,0.293572545612953,"CD109/FBN1/SKIL/SMAD7/SMURF2/TGFB1I1",6
GO:1902903,"GO:1902903","regulation of supramolecular fiber organization","12/304","373/18866",0.0183318868114358,0.0183318868114358,0.293572545612953,"ARHGAP28/DBN1/EDN1/LDLR/MYO1C/PICK1/PLEKHH2/PRKN/RGS4/SEMA5A/SLIT2/TPX2",12
GO:0006471,"GO:0006471","protein ADP-ribosylation","3/304","35/18866",0.0185350581929758,0.0185350581929758,0.293572545612953,"KAT2B/PARP8/TIPARP",3
GO:0060674,"GO:0060674","placenta blood vessel development","3/304","35/18866",0.0185350581929758,0.0185350581929758,0.293572545612953,"FZD5/HEY1/PLCD1",3
GO:0033500,"GO:0033500","carbohydrate homeostasis","9/304","246/18866",0.0186463949534547,0.0186463949534547,0.293572545612953,"FABP5/FGFR4/FOXA2/FOXO3/GCLC/HNF4A/IRS2/PDK4/WDR35",9
GO:0048193,"GO:0048193","Golgi vesicle transport","12/304","374/18866",0.0186765943476941,0.0186765943476941,0.293572545612953,"COPG2/DYNC1LI1/ERGIC1/F5/F8/INSIG1/KIF3C/LYPLA1/MIA3/PICK1/RAB33B/TRAPPC6B",12
GO:0007589,"GO:0007589","body fluid secretion","5/304","95/18866",0.0187789235867447,0.0187789235867447,0.293572545612953,"ATG5/CREB1/EDN1/MED1/SLC22A4",5
GO:0006888,"GO:0006888","endoplasmic reticulum to Golgi vesicle-mediated transport","8/304","206/18866",0.0188249071077322,0.0188249071077322,0.293572545612953,"COPG2/DYNC1LI1/ERGIC1/F5/F8/INSIG1/MIA3/TRAPPC6B",8
GO:0009410,"GO:0009410","response to xenobiotic stimulus","6/304","130/18866",0.0188624235091521,0.0188624235091521,0.293572545612953,"CBR3/CRYZ/CYP3A5/GCLC/HNF4A/MCM7",6
GO:0030111,"GO:0030111","regulation of Wnt signaling pathway","12/304","375/18866",0.0190261394801292,0.0190261394801292,0.293572545612953,"ANKRD6/BICC1/CCAR2/CXXC4/DIXDC1/FOXO3/GLI1/GPC5/KREMEN2/PRKN/SEMA5A/SMURF2",12
GO:0001558,"GO:0001558","regulation of cell growth","13/304","420/18866",0.0191898713877487,0.0191898713877487,0.293572545612953,"CCAR2/DBN1/EDN1/FN1/HNF4A/IGFBP7/PRKN/RGS4/SEMA5A/SLIT2/SMAD7/SPP1/UNC13A",13
GO:0003206,"GO:0003206","cardiac chamber morphogenesis","6/304","131/18866",0.0195098517545735,0.0195098517545735,0.293572545612953,"BMP7/HEY1/MED1/PKP2/SLIT2/SMAD7",6
GO:0003231,"GO:0003231","cardiac ventricle development","6/304","131/18866",0.0195098517545735,0.0195098517545735,0.293572545612953,"GREB1L/HEY1/MED1/PKP2/SLIT2/SMAD7",6
GO:0010508,"GO:0010508","positive regulation of autophagy","6/304","131/18866",0.0195098517545735,0.0195098517545735,0.293572545612953,"ATG5/BNIP3/FOXO3/PRKN/RIPK2/TRIM6",6
GO:1900449,"GO:1900449","regulation of glutamate receptor signaling pathway","4/304","64/18866",0.0197174362518947,0.0197174362518947,0.293572545612953,"FYN/NETO2/SHANK2/UNC13A",4
GO:0033280,"GO:0033280","response to vitamin D","3/304","36/18866",0.019984278647004,0.019984278647004,0.293572545612953,"BMP7/MED1/SPP1",3
GO:0033762,"GO:0033762","response to glucagon","3/304","36/18866",0.019984278647004,0.019984278647004,0.293572545612953,"ADCY7/ASS1/CREB1",3
GO:0060323,"GO:0060323","head morphogenesis","3/304","36/18866",0.019984278647004,0.019984278647004,0.293572545612953,"CRISPLD1/CRISPLD2/TIPARP",3
GO:0009612,"GO:0009612","response to mechanical stimulus","8/304","209/18866",0.0203325815220535,0.0203325815220535,0.293572545612953,"BACE1/BNIP3/EDN1/FYN/GCLC/JUN/STRBP/WHRN",8
GO:0018410,"GO:0018410","C-terminal protein amino acid modification","2/304","14/18866",0.020725634371866,0.020725634371866,0.293572545612953,"AGTPBP1/ATG5",2
GO:0034616,"GO:0034616","response to laminar fluid shear stress","2/304","14/18866",0.020725634371866,0.020725634371866,0.293572545612953,"ASS1/SMAD7",2
GO:0042762,"GO:0042762","regulation of sulfur metabolic process","2/304","14/18866",0.020725634371866,0.020725634371866,0.293572545612953,"PDK4/PDP1",2
GO:0048681,"GO:0048681","negative regulation of axon regeneration","2/304","14/18866",0.020725634371866,0.020725634371866,0.293572545612953,"EPHA4/SPP1",2
GO:0050966,"GO:0050966","detection of mechanical stimulus involved in sensory perception of pain","2/304","14/18866",0.020725634371866,0.020725634371866,0.293572545612953,"BACE1/FYN",2
GO:0090101,"GO:0090101","negative regulation of transmembrane receptor protein serine/threonine kinase signaling pathway","6/304","133/18866",0.0208498055459676,0.0208498055459676,0.293572545612953,"CD109/FBN1/SKIL/SMAD7/SMURF2/TGFB1I1",6
GO:0045216,"GO:0045216","cell-cell junction organization","8/304","210/18866",0.0208536967739584,0.0208536967739584,0.293572545612953,"CLDN3/CXADR/EPHA4/FZD5/MYO1C/PKP2/SMAD7/WHRN",8
GO:0007584,"GO:0007584","response to nutrient","7/304","171/18866",0.0210800108298308,0.0210800108298308,0.293572545612953,"ASS1/BMP7/ENSA/FOXA2/GCLC/MED1/SPP1",7
GO:0030307,"GO:0030307","positive regulation of cell growth","7/304","171/18866",0.0210800108298308,0.0210800108298308,0.293572545612953,"DBN1/EDN1/FN1/PRKN/SEMA5A/SMAD7/UNC13A",7
GO:0030316,"GO:0030316","osteoclast differentiation","5/304","98/18866",0.0211797445568545,0.0211797445568545,0.293572545612953,"CAMK4/CD109/CREB1/FBN1/MAFB",5
GO:2001243,"GO:2001243","negative regulation of intrinsic apoptotic signaling pathway","5/304","98/18866",0.0211797445568545,0.0211797445568545,0.293572545612953,"CCAR2/PRKN/PTTG1IP/RTKN2/YBX3",5
GO:0031396,"GO:0031396","regulation of protein ubiquitination","8/304","211/18866",0.0213842282859601,0.0213842282859601,0.293572545612953,"ATG5/DCUN1D5/FYN/GCLC/PRKN/PTTG1IP/RIPK2/SMAD7",8
GO:0007099,"GO:0007099","centriole replication","3/304","37/18866",0.021494218680956,0.021494218680956,0.293572545612953,"CETN2/KAT2B/PLK4",3
GO:0033363,"GO:0033363","secretory granule organization","3/304","37/18866",0.021494218680956,0.021494218680956,0.293572545612953,"CREB1/SNX19/TBPL1",3
GO:0048048,"GO:0048048","embryonic eye morphogenesis","3/304","37/18866",0.021494218680956,0.021494218680956,0.293572545612953,"BMP7/FBN1/FZD5",3
GO:0034754,"GO:0034754","cellular hormone metabolic process","6/304","134/18866",0.0215426134363833,0.0215426134363833,0.293572545612953,"CYP3A5/FDX1/MED1/SPP1/STARD3NL/TIPARP",6
GO:0006022,"GO:0006022","aminoglycan metabolic process","7/304","172/18866",0.0216829161737998,0.0216829161737998,0.293572545612953,"B4GAT1/CHST6/CHSY3/EXT1/GPC5/ST3GAL1/VCAN",7
GO:0050806,"GO:0050806","positive regulation of synaptic transmission","7/304","172/18866",0.0216829161737998,0.0216829161737998,0.293572545612953,"CREB1/EPHA4/NRGN/RGS4/SHANK2/SYT12/UNC13A",7
GO:1990138,"GO:1990138","neuron projection extension","7/304","172/18866",0.0216829161737998,0.0216829161737998,0.293572545612953,"DBN1/FN1/PRKN/RAPH1/SEMA5A/SLIT2/UNC13A",7
GO:0050768,"GO:0050768","negative regulation of neurogenesis","10/304","295/18866",0.0217875530438435,0.0217875530438435,0.293572545612953,"BMP7/DIXDC1/EPHA4/FOXO3/HEY1/LDLR/MED1/SEMA5A/SLIT2/SPP1",10
GO:0060828,"GO:0060828","regulation of canonical Wnt signaling pathway","10/304","295/18866",0.0217875530438435,0.0217875530438435,0.293572545612953,"ANKRD6/BICC1/CCAR2/FOXO3/GLI1/GPC5/KREMEN2/PRKN/SEMA5A/SMURF2",10
GO:0007585,"GO:0007585","respiratory gaseous exchange by respiratory system","4/304","66/18866",0.0218187763136582,0.0218187763136582,0.293572545612953,"BPGM/EDN1/MAFB/YWHAZ",4
GO:0051650,"GO:0051650","establishment of vesicle localization","8/304","212/18866",0.0219242574833274,0.0219242574833274,0.293572545612953,"F5/F8/FBXW11/MYO1C/MYO5B/PRKN/STARD3NL/TRAPPC6B",8
GO:0001701,"GO:0001701","in utero embryonic development","12/304","383/18866",0.0220013042430036,0.0220013042430036,0.293572545612953,"ACTL6A/ADAMTS3/BMP7/DBN1/EDN1/FZD5/HEY1/MED1/PLCD1/PLK4/SKIL/YBX3",12
GO:0032535,"GO:0032535","regulation of cellular component size","12/304","383/18866",0.0220013042430036,0.0220013042430036,0.293572545612953,"ARHGAP28/ATP13A2/CREB1/DBN1/EDN1/FN1/MYO1C/PICK1/PLEKHH2/SEMA5A/SLIT2/SPP1",12
GO:0032368,"GO:0032368","regulation of lipid transport","6/304","135/18866",0.0222508255442375,0.0222508255442375,0.293572545612953,"DBI/EDN1/IRS2/PLTP/PRKN/SPP1",6
GO:0006633,"GO:0006633","fatty acid biosynthetic process","7/304","173/18866",0.02229768843287,0.02229768843287,0.293572545612953,"EDN1/ELOVL7/FABP5/HACD1/INSIG1/PDK4/QKI",7
GO:0009152,"GO:0009152","purine ribonucleotide biosynthetic process","7/304","173/18866",0.02229768843287,0.02229768843287,0.293572545612953,"ADCY7/ELOVL7/HACD1/NME9/PDK4/PDP1/SLC25A13",7
GO:0003015,"GO:0003015","heart process","10/304","297/18866",0.0227006023935028,0.0227006023935028,0.293572545612953,"ATG5/CXADR/EDN1/FXYD2/FYN/GCH1/PKP2/RGS4/SMAD7/TRPC1",10
GO:0032890,"GO:0032890","regulation of organic acid transport","4/304","67/18866",0.0229187918959503,0.0229187918959503,0.293572545612953,"EDN1/IRS2/RGS4/SLC43A1",4
GO:0033866,"GO:0033866","nucleoside bisphosphate biosynthetic process","4/304","67/18866",0.0229187918959503,0.0229187918959503,0.293572545612953,"ELOVL7/HACD1/PDK4/PDP1",4
GO:0034030,"GO:0034030","ribonucleoside bisphosphate biosynthetic process","4/304","67/18866",0.0229187918959503,0.0229187918959503,0.293572545612953,"ELOVL7/HACD1/PDK4/PDP1",4
GO:0034033,"GO:0034033","purine nucleoside bisphosphate biosynthetic process","4/304","67/18866",0.0229187918959503,0.0229187918959503,0.293572545612953,"ELOVL7/HACD1/PDK4/PDP1",4
GO:0045670,"GO:0045670","regulation of osteoclast differentiation","4/304","67/18866",0.0229187918959503,0.0229187918959503,0.293572545612953,"CAMK4/CREB1/FBN1/MAFB",4
GO:0003205,"GO:0003205","cardiac chamber development","7/304","174/18866",0.0229244296968255,0.0229244296968255,0.293572545612953,"BMP7/GREB1L/HEY1/MED1/PKP2/SLIT2/SMAD7",7
GO:2000144,"GO:2000144","positive regulation of DNA-templated transcription, initiation","3/304","38/18866",0.0230649238259304,0.0230649238259304,0.293572545612953,"CREB1/JUN/MED1",3
GO:0021924,"GO:0021924","cell proliferation in external granule layer","2/304","15/18866",0.0236630210865303,0.0236630210865303,0.293572545612953,"GLI1/PSMG1",2
GO:0021930,"GO:0021930","cerebellar granule cell precursor proliferation","2/304","15/18866",0.0236630210865303,0.0236630210865303,0.293572545612953,"GLI1/PSMG1",2
GO:0034134,"GO:0034134","toll-like receptor 2 signaling pathway","2/304","15/18866",0.0236630210865303,0.0236630210865303,0.293572545612953,"PIK3AP1/RIPK2",2
GO:0048569,"GO:0048569","post-embryonic animal organ development","2/304","15/18866",0.0236630210865303,0.0236630210865303,0.293572545612953,"FBN1/FZD5",2
GO:0070571,"GO:0070571","negative regulation of neuron projection regeneration","2/304","15/18866",0.0236630210865303,0.0236630210865303,0.293572545612953,"EPHA4/SPP1",2
GO:0072498,"GO:0072498","embryonic skeletal joint development","2/304","15/18866",0.0236630210865303,0.0236630210865303,0.293572545612953,"BMP7/EXT1",2
GO:0090110,"GO:0090110","COPII-coated vesicle cargo loading","2/304","15/18866",0.0236630210865303,0.0236630210865303,0.293572545612953,"INSIG1/MIA3",2
GO:1904251,"GO:1904251","regulation of bile acid metabolic process","2/304","15/18866",0.0236630210865303,0.0236630210865303,0.293572545612953,"FGFR4/STARD4",2
GO:1905146,"GO:1905146","lysosomal protein catabolic process","2/304","15/18866",0.0236630210865303,0.0236630210865303,0.293572545612953,"ATP13A2/LDLR",2
GO:2000345,"GO:2000345","regulation of hepatocyte proliferation","2/304","15/18866",0.0236630210865303,0.0236630210865303,0.293572545612953,"GLI1/MED1",2
GO:0007215,"GO:0007215","glutamate receptor signaling pathway","5/304","101/18866",0.0237723043420989,0.0237723043420989,0.293572545612953,"FYN/GRM8/NETO2/SHANK2/UNC13A",5
GO:0019217,"GO:0019217","regulation of fatty acid metabolic process","5/304","101/18866",0.0237723043420989,0.0237723043420989,0.293572545612953,"FABP5/INSIG1/IRS2/PDK4/PDP1",5
GO:1902882,"GO:1902882","regulation of response to oxidative stress","5/304","101/18866",0.0237723043420989,0.0237723043420989,0.293572545612953,"BMP7/FOXO3/FYN/GCH1/PRKN",5
GO:0031098,"GO:0031098","stress-activated protein kinase signaling cascade","10/304","300/18866",0.0241217807560307,0.0241217807560307,0.296393231258798,"ANKRD6/EDAR/EDN1/EPHA4/FBXW11/FZD5/PRKN/RIPK2/SH2D3A/ULK4",10
GO:0014706,"GO:0014706","striated muscle tissue development","12/304","389/18866",0.0244493158949777,0.0244493158949777,0.296393231258798,"ATG5/BMP7/CREB1/CXADR/EDN1/GLI1/MED1/MRTFB/PKP2/RGS4/SMAD7/YBX3",12
GO:0046330,"GO:0046330","positive regulation of JNK cascade","6/304","138/18866",0.024469213364518,0.024469213364518,0.296393231258798,"ANKRD6/EDAR/EDN1/EPHA4/FZD5/RIPK2",6
GO:0043087,"GO:0043087","regulation of GTPase activity","14/304","481/18866",0.0246495748317756,0.0246495748317756,0.296393231258798,"ALS2CL/ARHGAP20/ARHGAP28/DEPDC1/EPHA4/IQSEC1/JUN/RANBP3L/RASA2/RGS4/SBF2/SLIT2/SRGAP1/TRAPPC6B",14
GO:0000079,"GO:0000079","regulation of cyclin-dependent protein serine/threonine kinase activity","5/304","102/18866",0.0246799276372408,0.0246799276372408,0.296393231258798,"CCNE2/CCNG1/CCNG2/CCNH/KAT2B",5
GO:0055024,"GO:0055024","regulation of cardiac muscle tissue development","5/304","102/18866",0.0246799276372408,0.0246799276372408,0.296393231258798,"CREB1/CXADR/EDN1/GLI1/RGS4",5
GO:0150115,"GO:0150115","cell-substrate junction organization","5/304","102/18866",0.0246799276372408,0.0246799276372408,0.296393231258798,"CD151/FN1/IQSEC1/LAMC1/SORBS1",5
GO:0006270,"GO:0006270","DNA replication initiation","3/304","39/18866",0.0246963847416997,0.0246963847416997,0.296393231258798,"CCNE2/MCM7/POLE4",3
GO:0021537,"GO:0021537","telencephalon development","9/304","259/18866",0.0250015863881489,0.0250015863881489,0.298859363177776,"AGTPBP1/BNIP3/DIXDC1/EXT1/NRGN/PHLPP2/POU3F2/SLIT2/ZSWIM6",9
GO:0036294,"GO:0036294","cellular response to decreased oxygen levels","8/304","218/18866",0.025368336733588,0.025368336733588,0.298859363177776,"BACH1/BMP7/BNIP3/EDN1/ERO1A/FOXO3/PICK1/TBL2",8
GO:0071805,"GO:0071805","potassium ion transmembrane transport","8/304","218/18866",0.025368336733588,0.025368336733588,0.298859363177776,"ABCB8/FXYD2/KCNH3/KCNMB4/KCNS1/KCNT2/NETO2/RGS4",8
GO:0007611,"GO:0007611","learning or memory","9/304","260/18866",0.0255470054710685,0.0255470054710685,0.298859363177776,"CAMK4/CREB1/FYN/GM2A/JUN/LDLR/NRGN/PRKN/SHANK2",9
GO:0042180,"GO:0042180","cellular ketone metabolic process","9/304","260/18866",0.0255470054710685,0.0255470054710685,0.298859363177776,"CBR3/COQ10B/FABP5/FGFR4/INSIG1/IRS2/PDK4/PDP1/STARD4",9
GO:0021587,"GO:0021587","cerebellum morphogenesis","3/304","40/18866",0.0263885395568748,0.0263885395568748,0.298859363177776,"AGTPBP1/GLI1/WHRN",3
GO:0035735,"GO:0035735","intraciliary transport involved in cilium assembly","3/304","40/18866",0.0263885395568748,0.0263885395568748,0.298859363177776,"KIF3C/SSX2IP/WDR35",3
GO:0042417,"GO:0042417","dopamine metabolic process","3/304","40/18866",0.0263885395568748,0.0263885395568748,0.298859363177776,"GCH1/MOXD1/PRKN",3
GO:0045746,"GO:0045746","negative regulation of Notch signaling pathway","3/304","40/18866",0.0263885395568748,0.0263885395568748,0.298859363177776,"BMP7/GDPD5/HEY1",3
GO:0098534,"GO:0098534","centriole assembly","3/304","40/18866",0.0263885395568748,0.0263885395568748,0.298859363177776,"CETN2/KAT2B/PLK4",3
GO:1902742,"GO:1902742","apoptotic process involved in development","3/304","40/18866",0.0263885395568748,0.0263885395568748,0.298859363177776,"BMP7/FZD5/SLIT2",3
GO:0032370,"GO:0032370","positive regulation of lipid transport","4/304","70/18866",0.0264187221741612,0.0264187221741612,0.298859363177776,"DBI/EDN1/PLTP/SPP1",4
GO:0006637,"GO:0006637","acyl-CoA metabolic process","5/304","104/18866",0.0265613074491969,0.0265613074491969,0.298859363177776,"DBI/ELOVL7/HACD1/PDK4/PDP1",5
GO:0035383,"GO:0035383","thioester metabolic process","5/304","104/18866",0.0265613074491969,0.0265613074491969,0.298859363177776,"DBI/ELOVL7/HACD1/PDK4/PDP1",5
GO:0031346,"GO:0031346","positive regulation of cell projection organization","12/304","394/18866",0.0266377058441377,0.0266377058441377,0.298859363177776,"BMP7/DBN1/EPHA4/FN1/FYN/PRKN/SEMA5A/SHANK2/SKIL/SLIT2/TENM3/UNC13A",12
GO:0006086,"GO:0006086","acetyl-CoA biosynthetic process from pyruvate","2/304","16/18866",0.026759801827812,0.026759801827812,0.298859363177776,"PDK4/PDP1",2
GO:0006390,"GO:0006390","mitochondrial transcription","2/304","16/18866",0.026759801827812,0.026759801827812,0.298859363177776,"FOXO3/MTERF1",2
GO:0021534,"GO:0021534","cell proliferation in hindbrain","2/304","16/18866",0.026759801827812,0.026759801827812,0.298859363177776,"GLI1/PSMG1",2
GO:0045725,"GO:0045725","positive regulation of glycogen biosynthetic process","2/304","16/18866",0.026759801827812,0.026759801827812,0.298859363177776,"IRS2/SORBS1",2
GO:0072176,"GO:0072176","nephric duct development","2/304","16/18866",0.026759801827812,0.026759801827812,0.298859363177776,"EPHA4/GREB1L",2
GO:1903541,"GO:1903541","regulation of exosomal secretion","2/304","16/18866",0.026759801827812,0.026759801827812,0.298859363177776,"ATP13A2/PRKN",2
GO:0001889,"GO:0001889","liver development","6/304","141/18866",0.0268308884730634,0.0268308884730634,0.298859363177776,"ASS1/GLI1/HNF4A/JUN/MED1/WDR35",6
GO:0030198,"GO:0030198","extracellular matrix organization","12/304","395/18866",0.0270920106174905,0.0270920106174905,0.300402781011649,"ADAMTS3/CRISPLD2/ERO1A/FBN1/FGFR4/FN1/HAPLN1/ITGA11/LAMC1/SPP1/TLL1/VCAN",12
GO:0031669,"GO:0031669","cellular response to nutrient levels","8/304","221/18866",0.0272249240725175,0.0272249240725175,0.300402781011649,"ATG5/FOXA2/FOXO3/JUN/MED1/PDK4/PICK1/TBL2",8
GO:0045637,"GO:0045637","regulation of myeloid cell differentiation","9/304","263/18866",0.0272338592853519,0.0272338592853519,0.300402781011649,"CAMK4/CREB1/FBN1/FOXO3/JUN/KAT2B/KMT2E/MAFB/MED1",9
GO:0044070,"GO:0044070","regulation of anion transport","5/304","105/18866",0.0275353672896152,0.0275353672896152,0.301123569093528,"DBI/EDN1/IRS2/RGS4/SLC43A1",5
GO:0043062,"GO:0043062","extracellular structure organization","12/304","396/18866",0.0275519416915302,0.0275519416915302,0.301123569093528,"ADAMTS3/CRISPLD2/ERO1A/FBN1/FGFR4/FN1/HAPLN1/ITGA11/LAMC1/SPP1/TLL1/VCAN",12
GO:0014823,"GO:0014823","response to activity","4/304","71/18866",0.0276525921154912,0.0276525921154912,0.301123569093528,"CREB1/EDN1/GCLC/TNS2",4
GO:0033692,"GO:0033692","cellular polysaccharide biosynthetic process","4/304","71/18866",0.0276525921154912,0.0276525921154912,0.301123569093528,"EXT1/GYG1/IRS2/SORBS1",4
GO:0048608,"GO:0048608","reproductive structure development","13/304","443/18866",0.0280695315369362,0.0280695315369362,0.301197571982563,"BMP7/FOXO3/FZD5/GLI1/GREB1L/HEY1/MED1/PLCD1/PLK4/SLIT2/SPP1/TIPARP/YBX3",13
GO:0048732,"GO:0048732","gland development","13/304","443/18866",0.0280695315369362,0.0280695315369362,0.301197571982563,"ASS1/BMP7/CREB1/EDAR/GLI1/HNF4A/IRS2/JUN/LBH/MAFB/MED1/POU3F2/WDR35",13
GO:0071548,"GO:0071548","response to dexamethasone","3/304","41/18866",0.0281412761390438,0.0281412761390438,0.301197571982563,"ASS1/EDN1/FOXO3",3
GO:0016049,"GO:0016049","cell growth","14/304","490/18866",0.0282518704388563,0.0282518704388563,0.301197571982563,"CCAR2/DBN1/EDN1/FN1/HNF4A/IGFBP7/PRKN/RAPH1/RGS4/SEMA5A/SLIT2/SMAD7/SPP1/UNC13A",14
GO:0090288,"GO:0090288","negative regulation of cellular response to growth factor stimulus","7/304","182/18866",0.0283809786608142,0.0283809786608142,0.301197571982563,"CD109/FBN1/SKIL/SLIT2/SMAD7/SMURF2/TGFB1I1",7
GO:0035296,"GO:0035296","regulation of tube diameter","6/304","143/18866",0.0284865397244198,0.0284865397244198,0.301197571982563,"ATG5/EDN1/GCH1/GCLC/KCNMB4/WDR35",6
GO:0097746,"GO:0097746","regulation of blood vessel diameter","6/304","143/18866",0.0284865397244198,0.0284865397244198,0.301197571982563,"ATG5/EDN1/GCH1/GCLC/KCNMB4/WDR35",6
GO:0019233,"GO:0019233","sensory perception of pain","5/304","106/18866",0.0285318650492131,0.0285318650492131,0.301197571982563,"BACE1/EDN1/FABP5/FYN/SCN9A",5
GO:1904029,"GO:1904029","regulation of cyclin-dependent protein kinase activity","5/304","106/18866",0.0285318650492131,0.0285318650492131,0.301197571982563,"CCNE2/CCNG1/CCNG2/CCNH/KAT2B",5
GO:0035150,"GO:0035150","regulation of tube size","6/304","144/18866",0.0293390638815872,0.0293390638815872,0.301197571982563,"ATG5/EDN1/GCH1/GCLC/KCNMB4/WDR35",6
GO:0061008,"GO:0061008","hepaticobiliary system development","6/304","144/18866",0.0293390638815872,0.0293390638815872,0.301197571982563,"ASS1/GLI1/HNF4A/JUN/MED1/WDR35",6
GO:0050905,"GO:0050905","neuromuscular process","5/304","107/18866",0.0295509359681652,0.0295509359681652,0.301197571982563,"AGTPBP1/BACE1/GCH1/GM2A/PRKN",5
GO:1903426,"GO:1903426","regulation of reactive oxygen species biosynthetic process","5/304","107/18866",0.0295509359681652,0.0295509359681652,0.301197571982563,"ASS1/EDN1/FOXO3/FYN/WDR35",5
GO:0046883,"GO:0046883","regulation of hormone secretion","9/304","267/18866",0.029603264503376,0.029603264503376,0.301197571982563,"CREB1/EDN1/ENSA/FOXA2/HNF4A/IRS2/PICK1/PRKN/SPP1",9
GO:0061458,"GO:0061458","reproductive system development","13/304","447/18866",0.0298784233960086,0.0298784233960086,0.301197571982563,"BMP7/FOXO3/FZD5/GLI1/GREB1L/HEY1/MED1/PLCD1/PLK4/SLIT2/SPP1/TIPARP/YBX3",13
GO:0010907,"GO:0010907","positive regulation of glucose metabolic process","3/304","42/18866",0.0299544342966657,0.0299544342966657,0.301197571982563,"IRS2/KAT2B/SORBS1",3
GO:0021795,"GO:0021795","cerebral cortex cell migration","3/304","42/18866",0.0299544342966657,0.0299544342966657,0.301197571982563,"DIXDC1/POU3F2/SLIT2",3
GO:0021983,"GO:0021983","pituitary gland development","3/304","42/18866",0.0299544342966657,0.0299544342966657,0.301197571982563,"CREB1/GLI1/POU3F2",3
GO:0003184,"GO:0003184","pulmonary valve morphogenesis","2/304","17/18866",0.0300101127987358,0.0300101127987358,0.301197571982563,"HEY1/SLIT2",2
GO:0009084,"GO:0009084","glutamine family amino acid biosynthetic process","2/304","17/18866",0.0300101127987358,0.0300101127987358,0.301197571982563,"ASL/ASS1",2
GO:0021692,"GO:0021692","cerebellar Purkinje cell layer morphogenesis","2/304","17/18866",0.0300101127987358,0.0300101127987358,0.301197571982563,"AGTPBP1/WHRN",2
GO:0070875,"GO:0070875","positive regulation of glycogen metabolic process","2/304","17/18866",0.0300101127987358,0.0300101127987358,0.301197571982563,"IRS2/SORBS1",2
GO:0090141,"GO:0090141","positive regulation of mitochondrial fission","2/304","17/18866",0.0300101127987358,0.0300101127987358,0.301197571982563,"BNIP3/PRKN",2
GO:0097067,"GO:0097067","cellular response to thyroid hormone stimulus","2/304","17/18866",0.0300101127987358,0.0300101127987358,0.301197571982563,"GCLC/MED1",2
GO:0007612,"GO:0007612","learning","6/304","145/18866",0.0302081965413973,0.0302081965413973,0.301197571982563,"CREB1/FYN/JUN/NRGN/PRKN/SHANK2",6
GO:0033135,"GO:0033135","regulation of peptidyl-serine phosphorylation","6/304","145/18866",0.0302081965413973,0.0302081965413973,0.301197571982563,"BRAF/PLCL1/RIPK2/SH2D3A/SMAD7/TRIM6",6
GO:0003208,"GO:0003208","cardiac ventricle morphogenesis","4/304","73/18866",0.0302220787946679,0.0302220787946679,0.301197571982563,"HEY1/MED1/PKP2/SMAD7",4
GO:0015807,"GO:0015807","L-amino acid transport","4/304","73/18866",0.0302220787946679,0.0302220787946679,0.301197571982563,"RGS4/SLC25A13/SLC36A4/SLC43A1",4
GO:1903747,"GO:1903747","regulation of establishment of protein localization to mitochondrion","4/304","73/18866",0.0302220787946679,0.0302220787946679,0.301197571982563,"ABLIM3/FZD5/PRKN/YWHAZ",4
GO:1901293,"GO:1901293","nucleoside phosphate biosynthetic process","9/304","269/18866",0.0308405448204674,0.0308405448204674,0.305584705788031,"ADCY7/ELOVL7/ENTPD8/HACD1/NME9/PDK4/PDP1/SLC25A13/TBPL1",9
GO:0009260,"GO:0009260","ribonucleotide biosynthetic process","7/304","186/18866",0.0314139011162929,0.0314139011162929,0.305584705788031,"ADCY7/ELOVL7/HACD1/NME9/PDK4/PDP1/SLC25A13",7
GO:0021536,"GO:0021536","diencephalon development","4/304","74/18866",0.0315579418479045,0.0315579418479045,0.305584705788031,"CREB1/GLI1/POU3F2/SEMA5A",4
GO:0043507,"GO:0043507","positive regulation of JUN kinase activity","4/304","74/18866",0.0315579418479045,0.0315579418479045,0.305584705788031,"EDN1/EPHA4/FZD5/RIPK2",4
GO:0051881,"GO:0051881","regulation of mitochondrial membrane potential","4/304","74/18866",0.0315579418479045,0.0315579418479045,0.305584705788031,"BNIP3/GCLC/PPA2/PRKN",4
GO:0046879,"GO:0046879","hormone secretion","10/304","314/18866",0.0316110154485207,0.0316110154485207,0.305584705788031,"CREB1/EDN1/ENSA/FOXA2/HNF4A/IRS2/PICK1/PRKN/SNX19/SPP1",10
GO:0018958,"GO:0018958","phenol-containing compound metabolic process","5/304","109/18866",0.0316573051614783,0.0316573051614783,0.305584705788031,"GCH1/MED1/MOXD1/PRKN/TRPC1",5
GO:0007178,"GO:0007178","transmembrane receptor protein serine/threonine kinase signaling pathway","11/304","359/18866",0.0317481363436087,0.0317481363436087,0.305584705788031,"BMP7/CD109/CREB1/FBN1/HNF4A/JUN/SKIL/SMAD7/SMURF2/TGFB1I1/UBE2O",11
GO:0048568,"GO:0048568","embryonic organ development","13/304","451/18866",0.0317708546899972,0.0317708546899972,0.305584705788031,"BMP7/EDN1/FBN1/FZD5/GLI1/HEY1/INSIG1/MAFB/MED1/PLCD1/PLK4/SOBP/WHRN",13
GO:0015804,"GO:0015804","neutral amino acid transport","3/304","43/18866",0.0318278079144575,0.0318278079144575,0.305584705788031,"RGS4/SLC36A4/SLC43A1",3
GO:0045773,"GO:0045773","positive regulation of axon extension","3/304","43/18866",0.0318278079144575,0.0318278079144575,0.305584705788031,"DBN1/FN1/SEMA5A",3
GO:0045823,"GO:0045823","positive regulation of heart contraction","3/304","43/18866",0.0318278079144575,0.0318278079144575,0.305584705788031,"EDN1/GCH1/RGS4",3
GO:1901031,"GO:1901031","regulation of response to reactive oxygen species","3/304","43/18866",0.0318278079144575,0.0318278079144575,0.305584705788031,"BMP7/FOXO3/GCH1",3
GO:0032970,"GO:0032970","regulation of actin filament-based process","12/304","405/18866",0.0319503021132549,0.0319503021132549,0.305899107754936,"ARHGAP28/DBN1/DIXDC1/EDN1/MYO1C/PICK1/PKP2/PLEKHH2/PRKN/RGS4/SEMA5A/SLIT2",12
GO:0050821,"GO:0050821","protein stabilization","7/304","187/18866",0.0322047968871434,0.0322047968871434,0.30665276829681,"CCNH/CREB1/EPHA4/PRKN/SMAD7/TBRG1/USP13",7
GO:0032956,"GO:0032956","regulation of actin cytoskeleton organization","11/304","360/18866",0.0322989273093351,0.0322989273093351,0.30665276829681,"ARHGAP28/DBN1/DIXDC1/EDN1/MYO1C/PICK1/PLEKHH2/PRKN/RGS4/SEMA5A/SLIT2",11
GO:0062197,"GO:0062197","cellular response to chemical stress","11/304","360/18866",0.0322989273093351,0.0322989273093351,0.30665276829681,"ATG5/ATP13A2/BMP7/BNIP3/ERO1A/FOXO3/FYN/GCH1/JUN/PRKN/YBX3",11
GO:0051648,"GO:0051648","vesicle localization","8/304","229/18866",0.0326324599046914,0.0326324599046914,0.30895878705085,"F5/F8/FBXW11/MYO1C/MYO5B/PRKN/STARD3NL/TRAPPC6B",8
GO:1901800,"GO:1901800","positive regulation of proteasomal protein catabolic process","5/304","110/18866",0.0327448407838503,0.0327448407838503,0.309164001918959,"GCLC/PRKN/RNF19B/SMAD7/USP13",5
GO:1900006,"GO:1900006","positive regulation of dendrite development","4/304","75/18866",0.0329280226801385,0.0329280226801385,0.310034711946171,"BMP7/DBN1/EPHA4/SHANK2",4
GO:0098657,"GO:0098657","import into cell","8/304","230/18866",0.0333563257302924,0.0333563257302924,0.311874434383016,"FXYD2/FYN/IRS2/PRKN/RGS4/SLC22A4/SLC36A4/SLC43A1",8
GO:0010839,"GO:0010839","negative regulation of keratinocyte proliferation","2/304","18/18866",0.0334082367006049,0.0334082367006049,0.311874434383016,"CD109/MED1",2
GO:0035994,"GO:0035994","response to muscle stretch","2/304","18/18866",0.0334082367006049,0.0334082367006049,0.311874434383016,"EDN1/JUN",2
GO:0010463,"GO:0010463","mesenchymal cell proliferation","3/304","44/18866",0.0337611470239743,0.0337611470239743,0.311874434383016,"BMP7/IRS2/PHF14",3
GO:0021575,"GO:0021575","hindbrain morphogenesis","3/304","44/18866",0.0337611470239743,0.0337611470239743,0.311874434383016,"AGTPBP1/GLI1/WHRN",3
GO:1902667,"GO:1902667","regulation of axon guidance","3/304","44/18866",0.0337611470239743,0.0337611470239743,0.311874434383016,"SEMA5A/SLIT2/ZSWIM6",3
GO:0010565,"GO:0010565","regulation of cellular ketone metabolic process","7/304","189/18866",0.0338263405420286,0.0338263405420286,0.311874434383016,"FABP5/FGFR4/INSIG1/IRS2/PDK4/PDP1/STARD4",7
GO:1903008,"GO:1903008","organelle disassembly","5/304","111/18866",0.0338554242389223,0.0338554242389223,0.311874434383016,"ATG5/ATP13A2/BNIP3/FZD5/PRKN",5
GO:0062012,"GO:0062012","regulation of small molecule metabolic process","13/304","456/18866",0.0342567520776604,0.0342567520776604,0.314567992481452,"FABP5/FGFR4/FOXA2/INSIG1/IRS2/KAT2B/LDLR/PDK4/PDP1/PRKN/SLC35B4/SORBS1/STARD4",13
GO:0033077,"GO:0033077","T cell differentiation in thymus","4/304","76/18866",0.0343324053560671,0.0343324053560671,0.314567992481452,"ATG5/CAMK4/FZD5/MAFB",4
GO:0008064,"GO:0008064","regulation of actin polymerization or depolymerization","7/304","190/18866",0.0346571391353909,0.0346571391353909,0.31669201783659,"ARHGAP28/DBN1/MYO1C/PICK1/PLEKHH2/SEMA5A/SLIT2",7
GO:0030832,"GO:0030832","regulation of actin filament length","7/304","191/18866",0.0355013861683205,0.0355013861683205,0.321697018923633,"ARHGAP28/DBN1/MYO1C/PICK1/PLEKHH2/SEMA5A/SLIT2",7
GO:0010828,"GO:0010828","positive regulation of glucose transmembrane transport","3/304","45/18866",0.0357541598110418,0.0357541598110418,0.321697018923633,"BRAF/IRS2/SORBS1",3
GO:0046189,"GO:0046189","phenol-containing compound biosynthetic process","3/304","45/18866",0.0357541598110418,0.0357541598110418,0.321697018923633,"GCH1/MOXD1/TRPC1",3
GO:0060412,"GO:0060412","ventricular septum morphogenesis","3/304","45/18866",0.0357541598110418,0.0357541598110418,0.321697018923633,"HEY1/SLIT2/SMAD7",3
GO:1903214,"GO:1903214","regulation of protein targeting to mitochondrion","3/304","45/18866",0.0357541598110418,0.0357541598110418,0.321697018923633,"ABLIM3/FZD5/PRKN",3
GO:0060411,"GO:0060411","cardiac septum morphogenesis","4/304","77/18866",0.0357711586360265,0.0357711586360265,0.321697018923633,"BMP7/HEY1/SLIT2/SMAD7",4
GO:1903510,"GO:1903510","mucopolysaccharide metabolic process","5/304","113/18866",0.0361461361458748,0.0361461361458748,0.323725836058794,"B4GAT1/CHST6/CHSY3/ST3GAL1/VCAN",5
GO:0110053,"GO:0110053","regulation of actin filament organization","9/304","278/18866",0.0368555077012817,0.0368555077012817,0.323725836058794,"ARHGAP28/DBN1/MYO1C/PICK1/PLEKHH2/PRKN/RGS4/SEMA5A/SLIT2",9
GO:0007039,"GO:0007039","protein catabolic process in the vacuole","2/304","19/18866",0.0369485995598665,0.0369485995598665,0.323725836058794,"ATP13A2/LDLR",2
GO:0009148,"GO:0009148","pyrimidine nucleoside triphosphate biosynthetic process","2/304","19/18866",0.0369485995598665,0.0369485995598665,0.323725836058794,"NME9/TBPL1",2
GO:0030050,"GO:0030050","vesicle transport along actin filament","2/304","19/18866",0.0369485995598665,0.0369485995598665,0.323725836058794,"MYO1C/MYO5B",2
GO:0035338,"GO:0035338","long-chain fatty-acyl-CoA biosynthetic process","2/304","19/18866",0.0369485995598665,0.0369485995598665,0.323725836058794,"ELOVL7/HACD1",2
GO:0150146,"GO:0150146","cell junction disassembly","2/304","19/18866",0.0369485995598665,0.0369485995598665,0.323725836058794,"EPHA4/IQSEC1",2
GO:1990182,"GO:1990182","exosomal secretion","2/304","19/18866",0.0369485995598665,0.0369485995598665,0.323725836058794,"ATP13A2/PRKN",2
GO:2000042,"GO:2000042","negative regulation of double-strand break repair via homologous recombination","2/304","19/18866",0.0369485995598665,0.0369485995598665,0.323725836058794,"FANCB/KLHL15",2
GO:0071453,"GO:0071453","cellular response to oxygen levels","8/304","235/18866",0.0371398184844666,0.0371398184844666,0.323725836058794,"BACH1/BMP7/BNIP3/EDN1/ERO1A/FOXO3/PICK1/TBL2",8
GO:0009914,"GO:0009914","hormone transport","10/304","323/18866",0.0372137973419366,0.0372137973419366,0.323725836058794,"CREB1/EDN1/ENSA/FOXA2/HNF4A/IRS2/PICK1/PRKN/SNX19/SPP1",10
GO:0000271,"GO:0000271","polysaccharide biosynthetic process","4/304","78/18866",0.0372443361732529,0.0372443361732529,0.323725836058794,"EXT1/GYG1/IRS2/SORBS1",4
GO:0060395,"GO:0060395","SMAD protein signal transduction","4/304","78/18866",0.0372443361732529,0.0372443361732529,0.323725836058794,"BMP7/HNF4A/JUN/SMAD7",4
GO:0043200,"GO:0043200","response to amino acid","5/304","114/18866",0.0373264487006024,0.0373264487006024,0.323725836058794,"ASS1/CREB1/EDN1/FYN/GCLC",5
GO:0005978,"GO:0005978","glycogen biosynthetic process","3/304","46/18866",0.0378065145616632,0.0378065145616632,0.324585693094698,"GYG1/IRS2/SORBS1",3
GO:0009250,"GO:0009250","glucan biosynthetic process","3/304","46/18866",0.0378065145616632,0.0378065145616632,0.324585693094698,"GYG1/IRS2/SORBS1",3
GO:0050982,"GO:0050982","detection of mechanical stimulus","3/304","46/18866",0.0378065145616632,0.0378065145616632,0.324585693094698,"BACE1/FYN/WHRN",3
GO:2000142,"GO:2000142","regulation of DNA-templated transcription, initiation","3/304","46/18866",0.0378065145616632,0.0378065145616632,0.324585693094698,"CREB1/JUN/MED1",3
GO:0046390,"GO:0046390","ribose phosphate biosynthetic process","7/304","194/18866",0.0381155131182841,0.0381155131182841,0.32641637523672,"ADCY7/ELOVL7/HACD1/NME9/PDK4/PDP1/SLC25A13",7
GO:0032872,"GO:0032872","regulation of stress-activated MAPK cascade","8/304","237/18866",0.0387309142946746,0.0387309142946746,0.329738595751801,"ANKRD6/EDAR/EDN1/EPHA4/FZD5/PRKN/RIPK2/ULK4",8
GO:0006809,"GO:0006809","nitric oxide biosynthetic process","4/304","79/18866",0.0387519767183121,0.0387519767183121,0.329738595751801,"ASS1/EDN1/GCH1/WDR35",4
GO:0061351,"GO:0061351","neural precursor cell proliferation","6/304","154/18866",0.038793674506377,0.038793674506377,0.329738595751801,"DBN1/DIXDC1/FOXO3/GLI1/POU3F2/PSMG1",6
GO:0071496,"GO:0071496","cellular response to external stimulus","10/304","326/18866",0.0392253765877325,0.0392253765877325,0.331849524075139,"ATG5/BNIP3/FOXA2/FOXO3/GCLC/JUN/MED1/PDK4/PICK1/TBL2",10
GO:0046620,"GO:0046620","regulation of organ growth","5/304","116/18866",0.0397573973867647,0.0397573973867647,0.331849524075139,"CXADR/EDN1/GLI1/RGS4/YBX3",5
GO:0030509,"GO:0030509","BMP signaling pathway","6/304","155/18866",0.0398340070642588,0.0398340070642588,0.331849524075139,"BMP7/FBN1/SKIL/SMAD7/SMURF2/UBE2O",6
GO:0006953,"GO:0006953","acute-phase response","3/304","47/18866",0.039917841547982,0.039917841547982,0.331849524075139,"ASS1/F8/FN1",3
GO:0014032,"GO:0014032","neural crest cell development","4/304","80/18866",0.0402941043301855,0.0402941043301855,0.331849524075139,"BMP7/EDN1/FN1/SEMA5A",4
GO:0031397,"GO:0031397","negative regulation of protein ubiquitination","4/304","80/18866",0.0402941043301855,0.0402941043301855,0.331849524075139,"ATG5/FYN/GCLC/SMAD7",4
GO:0048678,"GO:0048678","response to axon injury","4/304","80/18866",0.0402941043301855,0.0402941043301855,0.331849524075139,"BNIP3/EPHA4/JUN/SPP1",4
GO:0055021,"GO:0055021","regulation of cardiac muscle tissue growth","4/304","80/18866",0.0402941043301855,0.0402941043301855,0.331849524075139,"CXADR/EDN1/GLI1/RGS4",4
GO:0001822,"GO:0001822","kidney development","9/304","283/18866",0.0405227733533231,0.0405227733533231,0.331849524075139,"ASS1/BMP7/EPHA4/FBN1/GREB1L/SLIT2/SMAD7/TIPARP/TNS2",9
GO:0006525,"GO:0006525","arginine metabolic process","2/304","20/18866",0.0406257676186648,0.0406257676186648,0.331849524075139,"ASL/ASS1",2
GO:0016082,"GO:0016082","synaptic vesicle priming","2/304","20/18866",0.0406257676186648,0.0406257676186648,0.331849524075139,"UNC13A/VAMP1",2
GO:0042474,"GO:0042474","middle ear morphogenesis","2/304","20/18866",0.0406257676186648,0.0406257676186648,0.331849524075139,"EDN1/INSIG1",2
GO:0097062,"GO:0097062","dendritic spine maintenance","2/304","20/18866",0.0406257676186648,0.0406257676186648,0.331849524075139,"FYN/PICK1",2
GO:0097734,"GO:0097734","extracellular exosome biogenesis","2/304","20/18866",0.0406257676186648,0.0406257676186648,0.331849524075139,"ATP13A2/PRKN",2
GO:0006164,"GO:0006164","purine nucleotide biosynthetic process","7/304","197/18866",0.0408530950786016,0.0408530950786016,0.331849524075139,"ADCY7/ELOVL7/HACD1/NME9/PDK4/PDP1/SLC25A13",7
GO:0006694,"GO:0006694","steroid biosynthetic process","7/304","197/18866",0.0408530950786016,0.0408530950786016,0.331849524075139,"FDX1/FGFR4/IGFBP7/INSIG1/MED1/STARD3NL/STARD4",7
GO:0009749,"GO:0009749","response to glucose","7/304","197/18866",0.0408530950786016,0.0408530950786016,0.331849524075139,"ENSA/FOXA2/FOXO3/GCLC/HNF4A/IRS2/WDR35",7
GO:0030902,"GO:0030902","hindbrain development","6/304","156/18866",0.0408918962649724,0.0408918962649724,0.331849524075139,"AGTPBP1/BMP7/GLI1/MAFB/PSMG1/WHRN",6
GO:0048592,"GO:0048592","eye morphogenesis","6/304","156/18866",0.0408918962649724,0.0408918962649724,0.331849524075139,"AGTPBP1/BMP7/FBN1/FZD5/RORB/TENM3",6
GO:0070302,"GO:0070302","regulation of stress-activated protein kinase signaling cascade","8/304","240/18866",0.0412021793699604,0.0412021793699604,0.333450527895308,"ANKRD6/EDAR/EDN1/EPHA4/FZD5/PRKN/RIPK2/ULK4",8
GO:0007411,"GO:0007411","axon guidance","9/304","284/18866",0.0412848414555989,0.0412848414555989,0.333450527895308,"BMP7/ENAH/EPHA4/EXT1/FYN/IRS2/SEMA5A/SLIT2/ZSWIM6",9
GO:0010770,"GO:0010770","positive regulation of cell morphogenesis involved in differentiation","6/304","157/18866",0.0419674076536168,0.0419674076536168,0.334388628298963,"DBN1/EPHA4/FN1/SEMA5A/SKIL/SLIT2",6
GO:0001655,"GO:0001655","urogenital system development","10/304","330/18866",0.0420224623962152,0.0420224623962152,0.334388628298963,"ASS1/BMP7/EPHA4/FBN1/GLI1/GREB1L/SLIT2/SMAD7/TIPARP/TNS2",10
GO:0097485,"GO:0097485","neuron projection guidance","9/304","285/18866",0.042056549541832,0.042056549541832,0.334388628298963,"BMP7/ENAH/EPHA4/EXT1/FYN/IRS2/SEMA5A/SLIT2/ZSWIM6",9
GO:0031952,"GO:0031952","regulation of protein autophosphorylation","3/304","48/18866",0.04208773485585,0.04208773485585,0.334388628298963,"JUN/PPP2R5A/PPP2R5E",3
GO:0055010,"GO:0055010","ventricular cardiac muscle tissue morphogenesis","3/304","48/18866",0.04208773485585,0.04208773485585,0.334388628298963,"MED1/PKP2/SMAD7",3
GO:0060324,"GO:0060324","face development","3/304","48/18866",0.04208773485585,0.04208773485585,0.334388628298963,"CRISPLD1/CRISPLD2/TIPARP",3
GO:1900271,"GO:1900271","regulation of long-term synaptic potentiation","3/304","48/18866",0.04208773485585,0.04208773485585,0.334388628298963,"CREB1/EPHA4/NRGN",3
GO:0006813,"GO:0006813","potassium ion transport","8/304","242/18866",0.0429066994017159,0.0429066994017159,0.336558434161653,"ABCB8/FXYD2/KCNH3/KCNMB4/KCNS1/KCNT2/NETO2/RGS4",8
GO:1903320,"GO:1903320","regulation of protein modification by small protein conjugation or removal","8/304","242/18866",0.0429066994017159,0.0429066994017159,0.336558434161653,"ATG5/DCUN1D5/FYN/GCLC/PRKN/PTTG1IP/RIPK2/SMAD7",8
GO:1901222,"GO:1901222","regulation of NIK/NF-kappaB signaling","5/304","119/18866",0.0435806615742199,0.0435806615742199,0.336558434161653,"BMP7/EDAR/EDN1/FBXW11/RTKN2",5
GO:0060047,"GO:0060047","heart contraction","9/304","287/18866",0.0436290519426902,0.0436290519426902,0.336558434161653,"ATG5/CXADR/EDN1/FXYD2/GCH1/PKP2/RGS4/SMAD7/TRPC1",9
GO:0030705,"GO:0030705","cytoskeleton-dependent intracellular transport","7/304","200/18866",0.043715764534033,0.043715764534033,0.336558434161653,"COPG2/FBXW11/KIF3C/MYO1C/MYO5B/SSX2IP/WDR35",7
GO:1901654,"GO:1901654","response to ketone","7/304","200/18866",0.043715764534033,0.043715764534033,0.336558434161653,"ASS1/EDN1/FDX1/FOXO3/IGFBP7/SLIT2/SPP1",7
GO:0010171,"GO:0010171","body morphogenesis","3/304","49/18866",0.0443157541555099,0.0443157541555099,0.336558434161653,"CRISPLD1/CRISPLD2/TIPARP",3
GO:0042149,"GO:0042149","cellular response to glucose starvation","3/304","49/18866",0.0443157541555099,0.0443157541555099,0.336558434161653,"FOXO3/PICK1/TBL2",3
GO:0090199,"GO:0090199","regulation of release of cytochrome c from mitochondria","3/304","49/18866",0.0443157541555099,0.0443157541555099,0.336558434161653,"BNIP3/PRKN/WDR35",3
GO:0120178,"GO:0120178","steroid hormone biosynthetic process","3/304","49/18866",0.0443157541555099,0.0443157541555099,0.336558434161653,"FDX1/MED1/STARD3NL",3
GO:0003177,"GO:0003177","pulmonary valve development","2/304","21/18866",0.0444344442878649,0.0444344442878649,0.336558434161653,"HEY1/SLIT2",2
GO:0009713,"GO:0009713","catechol-containing compound biosynthetic process","2/304","21/18866",0.0444344442878649,0.0444344442878649,0.336558434161653,"GCH1/MOXD1",2
GO:0035357,"GO:0035357","peroxisome proliferator activated receptor signaling pathway","2/304","21/18866",0.0444344442878649,0.0444344442878649,0.336558434161653,"FABP5/MED1",2
GO:0042423,"GO:0042423","catecholamine biosynthetic process","2/304","21/18866",0.0444344442878649,0.0444344442878649,0.336558434161653,"GCH1/MOXD1",2
GO:0046514,"GO:0046514","ceramide catabolic process","2/304","21/18866",0.0444344442878649,0.0444344442878649,0.336558434161653,"ACER3/GM2A",2
GO:0060713,"GO:0060713","labyrinthine layer morphogenesis","2/304","21/18866",0.0444344442878649,0.0444344442878649,0.336558434161653,"BMP7/FZD5",2
GO:0072574,"GO:0072574","hepatocyte proliferation","2/304","21/18866",0.0444344442878649,0.0444344442878649,0.336558434161653,"GLI1/MED1",2
GO:0072575,"GO:0072575","epithelial cell proliferation involved in liver morphogenesis","2/304","21/18866",0.0444344442878649,0.0444344442878649,0.336558434161653,"GLI1/MED1",2
GO:0099515,"GO:0099515","actin filament-based transport","2/304","21/18866",0.0444344442878649,0.0444344442878649,0.336558434161653,"MYO1C/MYO5B",2
GO:1903599,"GO:1903599","positive regulation of autophagy of mitochondrion","2/304","21/18866",0.0444344442878649,0.0444344442878649,0.336558434161653,"BNIP3/PRKN",2
GO:2000737,"GO:2000737","negative regulation of stem cell differentiation","2/304","21/18866",0.0444344442878649,0.0444344442878649,0.336558434161653,"LBH/TRIM6",2
GO:0048145,"GO:0048145","regulation of fibroblast proliferation","4/304","83/18866",0.0451274343843588,0.0451274343843588,0.338795809266297,"CREB1/FN1/JUN/S100A6",4
GO:0055013,"GO:0055013","cardiac muscle cell development","4/304","83/18866",0.0451274343843588,0.0451274343843588,0.338795809266297,"ATG5/CXADR/EDN1/RGS4",4
GO:0071277,"GO:0071277","cellular response to calcium ion","4/304","83/18866",0.0451274343843588,0.0451274343843588,0.338795809266297,"BRAF/EDN1/JUN/SYT12",4
GO:2001021,"GO:2001021","negative regulation of response to DNA damage stimulus","4/304","83/18866",0.0451274343843588,0.0451274343843588,0.338795809266297,"CCAR2/FANCB/KLHL15/PTTG1IP",4
GO:0009746,"GO:0009746","response to hexose","7/304","202/18866",0.045694434373735,0.045694434373735,0.340896470610725,"ENSA/FOXA2/FOXO3/GCLC/HNF4A/IRS2/WDR35",7
GO:0034341,"GO:0034341","response to interferon-gamma","7/304","202/18866",0.045694434373735,0.045694434373735,0.340896470610725,"ASS1/CD58/EDN1/GCH1/MED1/MYO1C/PDE12",7
GO:0060485,"GO:0060485","mesenchyme development","9/304","290/18866",0.0460611207528724,0.0460611207528724,0.340896470610725,"BMP7/EDN1/FN1/FOXA2/HEY1/RANBP3L/SEMA5A/SMAD7/TGFB1I1",9
GO:0030218,"GO:0030218","erythrocyte differentiation","5/304","121/18866",0.0462480474454866,0.0462480474454866,0.340896470610725,"BPGM/FOXO3/KMT2E/MAFB/MED1",5
GO:0031398,"GO:0031398","positive regulation of protein ubiquitination","5/304","121/18866",0.0462480474454866,0.0462480474454866,0.340896470610725,"DCUN1D5/PRKN/PTTG1IP/RIPK2/SMAD7",5
GO:0008038,"GO:0008038","neuron recognition","3/304","50/18866",0.0466014264168678,0.0466014264168678,0.340896470610725,"EPHA4/SEMA5A/YWHAZ",3
GO:0021695,"GO:0021695","cerebellar cortex development","3/304","50/18866",0.0466014264168678,0.0466014264168678,0.340896470610725,"AGTPBP1/GLI1/WHRN",3
GO:0042987,"GO:0042987","amyloid precursor protein catabolic process","3/304","50/18866",0.0466014264168678,0.0466014264168678,0.340896470610725,"BACE1/EPHA4/UNC13A",3
GO:0045646,"GO:0045646","regulation of erythrocyte differentiation","3/304","50/18866",0.0466014264168678,0.0466014264168678,0.340896470610725,"FOXO3/MAFB/MED1",3
GO:0050873,"GO:0050873","brown fat cell differentiation","3/304","50/18866",0.0466014264168678,0.0466014264168678,0.340896470610725,"BMP7/BNIP3/ERO1A",3
GO:0014031,"GO:0014031","mesenchymal cell development","4/304","84/18866",0.0468074647416703,0.0468074647416703,0.340896470610725,"BMP7/EDN1/FN1/SEMA5A",4
GO:0046209,"GO:0046209","nitric oxide metabolic process","4/304","84/18866",0.0468074647416703,0.0468074647416703,0.340896470610725,"ASS1/EDN1/GCH1/WDR35",4
GO:0048144,"GO:0048144","fibroblast proliferation","4/304","84/18866",0.0468074647416703,0.0468074647416703,0.340896470610725,"CREB1/FN1/JUN/S100A6",4
GO:0048864,"GO:0048864","stem cell development","4/304","84/18866",0.0468074647416703,0.0468074647416703,0.340896470610725,"BMP7/EDN1/FN1/SEMA5A",4
GO:0045471,"GO:0045471","response to ethanol","5/304","122/18866",0.047617430882057,0.047617430882057,0.343016282651962,"ADCY7/CLDN3/FYN/GGH/RGS4",5
GO:0060348,"GO:0060348","bone development","7/304","204/18866",0.0477297454417804,0.0477297454417804,0.343016282651962,"FBN1/INPPL1/INSIG1/MED1/NAB2/RANBP3L/SP5",7
GO:0060541,"GO:0060541","respiratory system development","7/304","204/18866",0.0477297454417804,0.0477297454417804,0.343016282651962,"ASS1/CREB1/CRISPLD2/GLI1/LIPA/PHF14/YWHAZ",7
GO:0072001,"GO:0072001","renal system development","9/304","292/18866",0.0477318215475254,0.0477318215475254,0.343016282651962,"ASS1/BMP7/EPHA4/FBN1/GREB1L/SLIT2/SMAD7/TIPARP/TNS2",9
GO:0006085,"GO:0006085","acetyl-CoA biosynthetic process","2/304","22/18866",0.04836946716135,0.04836946716135,0.343016282651962,"PDK4/PDP1",2
GO:0034312,"GO:0034312","diol biosynthetic process","2/304","22/18866",0.04836946716135,0.04836946716135,0.343016282651962,"ACER3/GCH1",2
GO:0072576,"GO:0072576","liver morphogenesis","2/304","22/18866",0.04836946716135,0.04836946716135,0.343016282651962,"GLI1/MED1",2
GO:0140112,"GO:0140112","extracellular vesicle biogenesis","2/304","22/18866",0.04836946716135,0.04836946716135,0.343016282651962,"ATP13A2/PRKN",2
GO:0032092,"GO:0032092","positive regulation of protein binding","4/304","85/18866",0.0485218898803714,0.0485218898803714,0.343016282651962,"EPHA4/PLCL1/PRKN/RIPK2",4
GO:0045844,"GO:0045844","positive regulation of striated muscle tissue development","4/304","85/18866",0.0485218898803714,0.0485218898803714,0.343016282651962,"CREB1/EDN1/GLI1/MRTFB",4
GO:0048636,"GO:0048636","positive regulation of muscle organ development","4/304","85/18866",0.0485218898803714,0.0485218898803714,0.343016282651962,"CREB1/EDN1/GLI1/MRTFB",4
GO:0009267,"GO:0009267","cellular response to starvation","6/304","163/18866",0.0487937695631507,0.0487937695631507,0.343016282651962,"ATG5/FOXO3/JUN/PDK4/PICK1/TBL2",6
GO:0055088,"GO:0055088","lipid homeostasis","6/304","163/18866",0.0487937695631507,0.0487937695631507,0.343016282651962,"ATP13A2/FGFR4/HNF4A/INSIG1/IRS2/LDLR",6
GO:0048146,"GO:0048146","positive regulation of fibroblast proliferation","3/304","51/18866",0.0489442475707972,0.0489442475707972,0.343016282651962,"FN1/JUN/S100A6",3
GO:0050435,"GO:0050435","amyloid-beta metabolic process","3/304","51/18866",0.0489442475707972,0.0489442475707972,0.343016282651962,"BACE1/EPHA4/UNC13A",3
GO:0002761,"GO:0002761","regulation of myeloid leukocyte differentiation","5/304","123/18866",0.0490106495271557,0.0490106495271557,0.343016282651962,"CAMK4/CREB1/FBN1/JUN/MAFB",5
GO:0042471,"GO:0042471","ear morphogenesis","5/304","123/18866",0.0490106495271557,0.0490106495271557,0.343016282651962,"EDN1/INSIG1/MAFB/SOBP/WHRN",5
GO:0048675,"GO:0048675","axon extension","5/304","123/18866",0.0490106495271557,0.0490106495271557,0.343016282651962,"DBN1/FN1/RAPH1/SEMA5A/SLIT2",5
GO:0071466,"GO:0071466","cellular response to xenobiotic stimulus","5/304","123/18866",0.0490106495271557,0.0490106495271557,0.343016282651962,"CBR3/CRYZ/CYP3A5/HNF4A/MCM7",5
GO:0006352,"GO:0006352","DNA-templated transcription, initiation","8/304","249/18866",0.0492375308989239,0.0492375308989239,0.343898026425184,"CCNH/CREB1/HNF4A/JUN/KAT2B/MED1/RORB/TBPL1",8
GO:0007193,"GO:0007193","adenylate cyclase-inhibiting G protein-coupled receptor signaling pathway","4/304","86/18866",0.0502706504557379,0.0502706504557379,0.347798743866173,"ADCY7/EDN1/GPR176/GRM8",4
GO:0034637,"GO:0034637","cellular carbohydrate biosynthetic process","4/304","86/18866",0.0502706504557379,0.0502706504557379,0.347798743866173,"EXT1/GYG1/IRS2/SORBS1",4
GO:1901863,"GO:1901863","positive regulation of muscle tissue development","4/304","86/18866",0.0502706504557379,0.0502706504557379,0.347798743866173,"CREB1/EDN1/GLI1/MRTFB",4
GO:0034284,"GO:0034284","response to monosaccharide","7/304","207/18866",0.0508896883580833,0.0508896883580833,0.347798743866173,"ENSA/FOXA2/FOXO3/GCLC/HNF4A/IRS2/WDR35",7
GO:0031647,"GO:0031647","regulation of protein stability","9/304","296/18866",0.0511928738418958,0.0511928738418958,0.347798743866173,"CCAR2/CCNH/CREB1/EPHA4/FBXW11/PRKN/SMAD7/TBRG1/USP13",9
GO:0031103,"GO:0031103","axon regeneration","3/304","52/18866",0.0513436841178816,0.0513436841178816,0.347798743866173,"EPHA4/JUN/SPP1",3
GO:0050769,"GO:0050769","positive regulation of neurogenesis","13/304","485/18866",0.0514819704763438,0.0514819704763438,0.347798743866173,"BMP7/DBN1/EPHA4/FN1/FYN/GDPD5/PRKN/SEMA5A/SHANK2/SKIL/SLIT2/TENM3/UNC13A",13
GO:0035270,"GO:0035270","endocrine system development","5/304","125/18866",0.0518686784649432,0.0518686784649432,0.347798743866173,"CREB1/FOXA2/GLI1/HNF4A/POU3F2",5
GO:0071456,"GO:0071456","cellular response to hypoxia","7/304","208/18866",0.0519716894347935,0.0519716894347935,0.347798743866173,"BACH1/BMP7/BNIP3/EDN1/ERO1A/FOXO3/TBL2",7
GO:0072522,"GO:0072522","purine-containing compound biosynthetic process","7/304","208/18866",0.0519716894347935,0.0519716894347935,0.347798743866173,"ADCY7/ELOVL7/HACD1/NME9/PDK4/PDP1/SLC25A13",7
GO:0016042,"GO:0016042","lipid catabolic process","10/304","343/18866",0.0520467220174842,0.0520467220174842,0.347798743866173,"ACER3/FABP5/GM2A/IRS2/LDLR/LIPA/PLBD1/PLCD1/PLCXD2/SPP1",10
GO:0032436,"GO:0032436","positive regulation of proteasomal ubiquitin-dependent protein catabolic process","4/304","87/18866",0.0520536740563502,0.0520536740563502,0.347798743866173,"GCLC/PRKN/RNF19B/SMAD7",4
GO:0060420,"GO:0060420","regulation of heart growth","4/304","87/18866",0.0520536740563502,0.0520536740563502,0.347798743866173,"CXADR/EDN1/GLI1/RGS4",4
GO:2001057,"GO:2001057","reactive nitrogen species metabolic process","4/304","87/18866",0.0520536740563502,0.0520536740563502,0.347798743866173,"ASS1/EDN1/GCH1/WDR35",4
GO:0007413,"GO:0007413","axonal fasciculation","2/304","23/18866",0.0524258050904205,0.0524258050904205,0.347798743866173,"EPHA4/SEMA5A",2
GO:0009147,"GO:0009147","pyrimidine nucleoside triphosphate metabolic process","2/304","23/18866",0.0524258050904205,0.0524258050904205,0.347798743866173,"NME9/TBPL1",2
GO:0035458,"GO:0035458","cellular response to interferon-beta","2/304","23/18866",0.0524258050904205,0.0524258050904205,0.347798743866173,"DDX41/TRIM6",2
GO:0046599,"GO:0046599","regulation of centriole replication","2/304","23/18866",0.0524258050904205,0.0524258050904205,0.347798743866173,"KAT2B/PLK4",2
GO:0048791,"GO:0048791","calcium ion-regulated exocytosis of neurotransmitter","2/304","23/18866",0.0524258050904205,0.0524258050904205,0.347798743866173,"SYT12/UNC13A",2
GO:0106030,"GO:0106030","neuron projection fasciculation","2/304","23/18866",0.0524258050904205,0.0524258050904205,0.347798743866173,"EPHA4/SEMA5A",2
GO:1900273,"GO:1900273","positive regulation of long-term synaptic potentiation","2/304","23/18866",0.0524258050904205,0.0524258050904205,0.347798743866173,"CREB1/NRGN",2
GO:1902254,"GO:1902254","negative regulation of intrinsic apoptotic signaling pathway by p53 class mediator","2/304","23/18866",0.0524258050904205,0.0524258050904205,0.347798743866173,"PRKN/PTTG1IP",2
GO:1903077,"GO:1903077","negative regulation of protein localization to plasma membrane","2/304","23/18866",0.0524258050904205,0.0524258050904205,0.347798743866173,"LYPLA1/PPP2R5A",2
GO:1903861,"GO:1903861","positive regulation of dendrite extension","2/304","23/18866",0.0524258050904205,0.0524258050904205,0.347798743866173,"PRKN/UNC13A",2
GO:0009408,"GO:0009408","response to heat","6/304","166/18866",0.0524490817263288,0.0524490817263288,0.347798743866173,"CCAR2/GCLC/IER5/IGFBP7/MYOF/TGFB1I1",6
GO:2001242,"GO:2001242","regulation of intrinsic apoptotic signaling pathway","6/304","166/18866",0.0524490817263288,0.0524490817263288,0.347798743866173,"CCAR2/PRKN/PTTG1IP/RTKN2/SKIL/YBX3",6
GO:0031668,"GO:0031668","cellular response to extracellular stimulus","8/304","253/18866",0.0531139818731741,0.0531139818731741,0.351523910690522,"ATG5/FOXA2/FOXO3/JUN/MED1/PDK4/PICK1/TBL2",8
GO:0018210,"GO:0018210","peptidyl-threonine modification","5/304","126/18866",0.0533335158246542,0.0533335158246542,0.351560531887982,"BMP7/EOGT/RIPK2/SMAD7/TRIM6",5
GO:0042073,"GO:0042073","intraciliary transport","3/304","53/18866",0.0537991746859703,0.0537991746859703,0.351560531887982,"KIF3C/SSX2IP/WDR35",3
GO:0045668,"GO:0045668","negative regulation of osteoblast differentiation","3/304","53/18866",0.0537991746859703,0.0537991746859703,0.351560531887982,"RANBP3L/RIOX1/RORB",3
GO:0046470,"GO:0046470","phosphatidylcholine metabolic process","4/304","88/18866",0.0538708754522022,0.0538708754522022,0.351560531887982,"DBI/FABP5/LDLR/PLBD1",4
GO:0046889,"GO:0046889","positive regulation of lipid biosynthetic process","4/304","88/18866",0.0538708754522022,0.0538708754522022,0.351560531887982,"CREB1/LDLR/SORBS1/STARD4",4
GO:0090559,"GO:0090559","regulation of membrane permeability","4/304","88/18866",0.0538708754522022,0.0538708754522022,0.351560531887982,"BNIP3/CLDN3/GCLC/YWHAZ",4
GO:0000086,"GO:0000086","G2/M transition of mitotic cell cycle","8/304","254/18866",0.0541128681222601,0.0541128681222601,0.351560531887982,"BACH1/CCNH/CEP57/CETN2/ENSA/FBXW11/PLK4/TPX2",8
GO:0090092,"GO:0090092","regulation of transmembrane receptor protein serine/threonine kinase signaling pathway","8/304","254/18866",0.0541128681222601,0.0541128681222601,0.351560531887982,"BMP7/CD109/FBN1/SKIL/SMAD7/SMURF2/TGFB1I1/UBE2O",8
GO:0002573,"GO:0002573","myeloid leukocyte differentiation","7/304","210/18866",0.0541789354537699,0.0541789354537699,0.351560531887982,"CAMK4/CD109/CREB1/FBN1/JUN/MAFB/MED1",7
GO:0006109,"GO:0006109","regulation of carbohydrate metabolic process","7/304","210/18866",0.0541789354537699,0.0541789354537699,0.351560531887982,"FOXA2/IRS2/KAT2B/PDK4/PRKN/SLC35B4/SORBS1",7
GO:0034765,"GO:0034765","regulation of ion transmembrane transport","13/304","489/18866",0.0542541067895073,0.0542541067895073,0.351560531887982,"ATG5/FXYD2/FYN/IRS2/KCNH3/KCNS1/NETO2/RGS4/SCN9A/SHANK2/SLC43A1/TMEM37/TRPC1",13
GO:0006869,"GO:0006869","lipid transport","11/304","393/18866",0.0544794316215991,0.0544794316215991,0.351561805865624,"DBI/EDN1/FABP5/GM2A/IRS2/LDLR/PLTP/PRKN/PROCA1/SPP1/STARD4",11
GO:0051258,"GO:0051258","protein polymerization","9/304","300/18866",0.0548151873549194,0.0548151873549194,0.351561805865624,"ARHGAP28/DBN1/MYO1C/PICK1/PRKN/SLIT2/TPX2/TRIM6/WASHC3",9
GO:0019079,"GO:0019079","viral genome replication","5/304","127/18866",0.0548222426142664,0.0548222426142664,0.351561805865624,"ATG16L2/ATG5/PDE12/PRKN/TRIM6",5
GO:1903052,"GO:1903052","positive regulation of proteolysis involved in cellular protein catabolic process","5/304","127/18866",0.0548222426142664,0.0548222426142664,0.351561805865624,"GCLC/PRKN/RNF19B/SMAD7/USP13",5
GO:1905477,"GO:1905477","positive regulation of protein localization to membrane","5/304","127/18866",0.0548222426142664,0.0548222426142664,0.351561805865624,"FYN/MYO1C/PRKN/SORBS1/YWHAZ",5
GO:0071772,"GO:0071772","response to BMP","6/304","168/18866",0.0549763188388074,0.0549763188388074,0.351561805865624,"BMP7/FBN1/SKIL/SMAD7/SMURF2/UBE2O",6
GO:0071773,"GO:0071773","cellular response to BMP stimulus","6/304","168/18866",0.0549763188388074,0.0549763188388074,0.351561805865624,"BMP7/FBN1/SKIL/SMAD7/SMURF2/UBE2O",6
GO:0014033,"GO:0014033","neural crest cell differentiation","4/304","89/18866",0.055722156845663,0.055722156845663,0.354336888975367,"BMP7/EDN1/FN1/SEMA5A",4
GO:0043506,"GO:0043506","regulation of JUN kinase activity","4/304","89/18866",0.055722156845663,0.055722156845663,0.354336888975367,"EDN1/EPHA4/FZD5/RIPK2",4
GO:0055006,"GO:0055006","cardiac cell development","4/304","89/18866",0.055722156845663,0.055722156845663,0.354336888975367,"ATG5/CXADR/EDN1/RGS4",4
GO:0008016,"GO:0008016","regulation of heart contraction","8/304","256/18866",0.0561465864535663,0.0561465864535663,0.355173797733805,"CXADR/EDN1/FXYD2/GCH1/PKP2/RGS4/SMAD7/TRPC1",8
GO:0048872,"GO:0048872","homeostasis of number of cells","8/304","256/18866",0.0561465864535663,0.0561465864535663,0.355173797733805,"BPGM/FOXO3/KMT2E/LIPA/MAFB/MED1/SKIL/SLC40A1",8
GO:0006584,"GO:0006584","catecholamine metabolic process","3/304","54/18866",0.0563101315378889,0.0563101315378889,0.355173797733805,"GCH1/MOXD1/PRKN",3
GO:0009712,"GO:0009712","catechol-containing compound metabolic process","3/304","54/18866",0.0563101315378889,0.0563101315378889,0.355173797733805,"GCH1/MOXD1/PRKN",3
GO:0030278,"GO:0030278","regulation of ossification","7/304","212/18866",0.0564440484518288,0.0564440484518288,0.355173797733805,"BMP7/GLI1/KREMEN2/RANBP3L/RIOX1/RORB/SMAD7",7
GO:0021697,"GO:0021697","cerebellar cortex formation","2/304","24/18866",0.0565985553171423,0.0565985553171423,0.355173797733805,"AGTPBP1/WHRN",2
GO:0071294,"GO:0071294","cellular response to zinc ion","2/304","24/18866",0.0565985553171423,0.0565985553171423,0.355173797733805,"ATP13A2/CREB1",2
GO:0048562,"GO:0048562","embryonic organ morphogenesis","9/304","302/18866",0.0566874053949446,0.0566874053949446,0.355173797733805,"BMP7/EDN1/FBN1/FZD5/GLI1/INSIG1/MAFB/SOBP/WHRN",9
GO:0030072,"GO:0030072","peptide hormone secretion","8/304","257/18866",0.0571814749449463,0.0571814749449463,0.357612005546569,"EDN1/ENSA/FOXA2/HNF4A/IRS2/PICK1/PRKN/SNX19",8
GO:0032874,"GO:0032874","positive regulation of stress-activated MAPK cascade","6/304","170/18866",0.0575760868514098,0.0575760868514098,0.357846171735933,"ANKRD6/EDAR/EDN1/EPHA4/FZD5/RIPK2",6
GO:0016051,"GO:0016051","carbohydrate biosynthetic process","7/304","213/18866",0.0575983750752505,0.0575983750752505,0.357846171735933,"EXT1/GYG1/IRS2/KAT2B/SLC25A13/SLC35B4/SORBS1",7
GO:0030073,"GO:0030073","insulin secretion","7/304","213/18866",0.0575983750752505,0.0575983750752505,0.357846171735933,"ENSA/FOXA2/HNF4A/IRS2/PICK1/PRKN/SNX19",7
GO:1903522,"GO:1903522","regulation of blood circulation","9/304","303/18866",0.0576388730293008,0.0576388730293008,0.357846171735933,"CXADR/EDN1/FXYD2/GCH1/KCNMB4/PKP2/RGS4/SMAD7/TRPC1",9
GO:0034101,"GO:0034101","erythrocyte homeostasis","5/304","129/18866",0.057871349436009,0.057871349436009,0.358636228657985,"BPGM/FOXO3/KMT2E/MAFB/MED1",5
GO:0046942,"GO:0046942","carboxylic acid transport","10/304","350/18866",0.0580532981678492,0.0580532981678492,0.359110859618867,"EDN1/FABP5/IRS2/PROCA1/RGS4/SLC16A3/SLC22A4/SLC25A13/SLC36A4/SLC43A1",10
GO:1901617,"GO:1901617","organic hydroxy compound biosynthetic process","8/304","258/18866",0.0582284181716131,0.0582284181716131,0.35954160572022,"ACER3/FGFR4/GCH1/INSIG1/MOXD1/PLTP/STARD4/TRPC1",8
GO:0003229,"GO:0003229","ventricular cardiac muscle tissue development","3/304","55/18866",0.058875942030615,0.058875942030615,0.359797427438505,"MED1/PKP2/SMAD7",3
GO:0022029,"GO:0022029","telencephalon cell migration","3/304","55/18866",0.058875942030615,0.058875942030615,0.359797427438505,"DIXDC1/POU3F2/SLIT2",3
GO:0042304,"GO:0042304","regulation of fatty acid biosynthetic process","3/304","55/18866",0.058875942030615,0.058875942030615,0.359797427438505,"FABP5/INSIG1/PDK4",3
GO:0051353,"GO:0051353","positive regulation of oxidoreductase activity","3/304","55/18866",0.058875942030615,0.058875942030615,0.359797427438505,"EDN1/GCH1/PDP1",3
GO:0097345,"GO:0097345","mitochondrial outer membrane permeabilization","3/304","55/18866",0.058875942030615,0.058875942030615,0.359797427438505,"BNIP3/GCLC/YWHAZ",3
GO:1905952,"GO:1905952","regulation of lipid localization","6/304","171/18866",0.0589032168885582,0.0589032168885582,0.359797427438505,"DBI/EDN1/IRS2/PLTP/PRKN/SPP1",6
GO:0051952,"GO:0051952","regulation of amine transport","4/304","91/18866",0.0595265071197844,0.0595265071197844,0.362945728026188,"PRKN/RGS4/SLC43A1/SYT12",4
GO:0070304,"GO:0070304","positive regulation of stress-activated protein kinase signaling cascade","6/304","172/18866",0.0602485289625856,0.0602485289625856,0.362945728026188,"ANKRD6/EDAR/EDN1/EPHA4/FZD5/RIPK2",6
GO:0015849,"GO:0015849","organic acid transport","10/304","353/18866",0.06076104760176,0.06076104760176,0.362945728026188,"EDN1/FABP5/IRS2/PROCA1/RGS4/SLC16A3/SLC22A4/SLC25A13/SLC36A4/SLC43A1",10
GO:0032366,"GO:0032366","intracellular sterol transport","2/304","25/18866",0.0608829406655134,0.0608829406655134,0.362945728026188,"LDLR/STARD4",2
GO:0032367,"GO:0032367","intracellular cholesterol transport","2/304","25/18866",0.0608829406655134,0.0608829406655134,0.362945728026188,"LDLR/STARD4",2
GO:0035336,"GO:0035336","long-chain fatty-acyl-CoA metabolic process","2/304","25/18866",0.0608829406655134,0.0608829406655134,0.362945728026188,"ELOVL7/HACD1",2
GO:0045992,"GO:0045992","negative regulation of embryonic development","2/304","25/18866",0.0608829406655134,0.0608829406655134,0.362945728026188,"BMP7/GPR161",2
GO:0060669,"GO:0060669","embryonic placenta morphogenesis","2/304","25/18866",0.0608829406655134,0.0608829406655134,0.362945728026188,"BMP7/FZD5",2
GO:0061050,"GO:0061050","regulation of cell growth involved in cardiac muscle cell development","2/304","25/18866",0.0608829406655134,0.0608829406655134,0.362945728026188,"EDN1/RGS4",2
GO:0062149,"GO:0062149","detection of stimulus involved in sensory perception of pain","2/304","25/18866",0.0608829406655134,0.0608829406655134,0.362945728026188,"BACE1/FYN",2
GO:1903859,"GO:1903859","regulation of dendrite extension","2/304","25/18866",0.0608829406655134,0.0608829406655134,0.362945728026188,"PRKN/UNC13A",2
GO:1904376,"GO:1904376","negative regulation of protein localization to cell periphery","2/304","25/18866",0.0608829406655134,0.0608829406655134,0.362945728026188,"LYPLA1/PPP2R5A",2
GO:0019218,"GO:0019218","regulation of steroid metabolic process","5/304","131/18866",0.0610159070571511,0.0610159070571511,0.362945728026188,"FGFR4/IGFBP7/INSIG1/LDLR/STARD4",5
GO:0032434,"GO:0032434","regulation of proteasomal ubiquitin-dependent protein catabolic process","5/304","131/18866",0.0610159070571511,0.0610159070571511,0.362945728026188,"CCAR2/GCLC/PRKN/RNF19B/SMAD7",5
GO:0045667,"GO:0045667","regulation of osteoblast differentiation","5/304","131/18866",0.0610159070571511,0.0610159070571511,0.362945728026188,"BMP7/GLI1/RANBP3L/RIOX1/RORB",5
GO:0001894,"GO:0001894","tissue homeostasis","8/304","261/18866",0.0614418145872128,0.0614418145872128,0.36326544002203,"CLDN3/CXADR/LAMC1/LIPA/NXNL2/PDK4/SPP1/WHRN",8
GO:0009953,"GO:0009953","dorsal/ventral pattern formation","4/304","92/18866",0.0614793198589141,0.0614793198589141,0.36326544002203,"CXXC4/EDN1/GLI1/GPR161",4
GO:1903321,"GO:1903321","negative regulation of protein modification by small protein conjugation or removal","4/304","92/18866",0.0614793198589141,0.0614793198589141,0.36326544002203,"ATG5/FYN/GCLC/SMAD7",4
GO:0001755,"GO:0001755","neural crest cell migration","3/304","56/18866",0.0614959700272006,0.0614959700272006,0.36326544002203,"BMP7/FN1/SEMA5A",3
GO:0022604,"GO:0022604","regulation of cell morphogenesis","13/304","499/18866",0.0616256861172495,0.0616256861172495,0.363401878797403,"CLDN3/DBN1/EPHA4/FN1/FYN/POU3F2/PRKN/SEMA5A/SKIL/SLIT2/SPP1/UNC13A/ZSWIM6",13
GO:0001101,"GO:0001101","response to acid chemical","5/304","132/18866",0.0626239244643752,0.0626239244643752,0.368015004384114,"ASS1/CREB1/EDN1/FYN/GCLC",5
GO:0019751,"GO:0019751","polyol metabolic process","5/304","132/18866",0.0626239244643752,0.0626239244643752,0.368015004384114,"ACER3/GCH1/INPPL1/MYOF/PLCD1",5
GO:0006497,"GO:0006497","protein lipidation","4/304","93/18866",0.0634657008292058,0.0634657008292058,0.372003556312654,"ATG10/ATG5/DBI/PIGM",4
GO:0007269,"GO:0007269","neurotransmitter secretion","6/304","175/18866",0.0643936314212071,0.0643936314212071,0.372003556312654,"BACE1/KCNMB4/PRKN/SYT12/UNC13A/VAMP1",6
GO:0099643,"GO:0099643","signal release from synapse","6/304","175/18866",0.0643936314212071,0.0643936314212071,0.372003556312654,"BACE1/KCNMB4/PRKN/SYT12/UNC13A/VAMP1",6
GO:0010769,"GO:0010769","regulation of cell morphogenesis involved in differentiation","9/304","310/18866",0.0645879941111719,0.0645879941111719,0.372003556312654,"DBN1/EPHA4/FN1/POU3F2/SEMA5A/SKIL/SLIT2/SPP1/ZSWIM6",9
GO:0034599,"GO:0034599","cellular response to oxidative stress","9/304","310/18866",0.0645879941111719,0.0645879941111719,0.372003556312654,"ATP13A2/BMP7/BNIP3/ERO1A/FOXO3/FYN/GCH1/JUN/PRKN",9
GO:0033157,"GO:0033157","regulation of intracellular protein transport","8/304","264/18866",0.0647644998823725,0.0647644998823725,0.372003556312654,"ABLIM3/ATP13A2/FYN/FZD5/INSIG1/MYO1C/PRKN/YWHAZ",8
GO:0030178,"GO:0030178","negative regulation of Wnt signaling pathway","7/304","219/18866",0.0648305017492548,0.0648305017492548,0.372003556312654,"ANKRD6/BICC1/CXXC4/FOXO3/GLI1/KREMEN2/PRKN",7
GO:0006700,"GO:0006700","C21-steroid hormone biosynthetic process","2/304","26/18866",0.0652743067893396,0.0652743067893396,0.372003556312654,"FDX1/STARD3NL",2
GO:0019430,"GO:0019430","removal of superoxide radicals","2/304","26/18866",0.0652743067893396,0.0652743067893396,0.372003556312654,"BMP7/GCH1",2
GO:0021952,"GO:0021952","central nervous system projection neuron axonogenesis","2/304","26/18866",0.0652743067893396,0.0652743067893396,0.372003556312654,"EPHA4/SLIT2",2
GO:0030206,"GO:0030206","chondroitin sulfate biosynthetic process","2/304","26/18866",0.0652743067893396,0.0652743067893396,0.372003556312654,"CHSY3/VCAN",2
GO:0060343,"GO:0060343","trabecula formation","2/304","26/18866",0.0652743067893396,0.0652743067893396,0.372003556312654,"HEY1/SLC40A1",2
GO:0060561,"GO:0060561","apoptotic process involved in morphogenesis","2/304","26/18866",0.0652743067893396,0.0652743067893396,0.372003556312654,"BMP7/FZD5",2
GO:0060706,"GO:0060706","cell differentiation involved in embryonic placenta development","2/304","26/18866",0.0652743067893396,0.0652743067893396,0.372003556312654,"FZD5/PLK4",2
GO:0070633,"GO:0070633","transepithelial transport","2/304","26/18866",0.0652743067893396,0.0652743067893396,0.372003556312654,"CXADR/EDN1",2
GO:0071377,"GO:0071377","cellular response to glucagon stimulus","2/304","26/18866",0.0652743067893396,0.0652743067893396,0.372003556312654,"ADCY7/ASS1",2
GO:0097066,"GO:0097066","response to thyroid hormone","2/304","26/18866",0.0652743067893396,0.0652743067893396,0.372003556312654,"GCLC/MED1",2
GO:0060349,"GO:0060349","bone morphogenesis","4/304","94/18866",0.0654854932360138,0.0654854932360138,0.372003556312654,"INPPL1/INSIG1/NAB2/SP5",4
GO:1901264,"GO:1901264","carbohydrate derivative transport","4/304","94/18866",0.0654854932360138,0.0654854932360138,0.372003556312654,"ATG5/PLTP/SLC25A13/SLC35B4",4
GO:1905954,"GO:1905954","positive regulation of lipid localization","4/304","94/18866",0.0654854932360138,0.0654854932360138,0.372003556312654,"DBI/EDN1/PLTP/SPP1",4
GO:0071333,"GO:0071333","cellular response to glucose stimulus","5/304","134/18866",0.0659112729826194,0.0659112729826194,0.373799285257416,"FOXA2/FOXO3/GCLC/IRS2/WDR35",5
GO:0007566,"GO:0007566","embryo implantation","3/304","58/18866",0.0668960246652359,0.0668960246652359,0.377499700010516,"IGFBP7/SMURF2/SPP1",3
GO:0021885,"GO:0021885","forebrain cell migration","3/304","58/18866",0.0668960246652359,0.0668960246652359,0.377499700010516,"DIXDC1/POU3F2/SLIT2",3
GO:1903749,"GO:1903749","positive regulation of establishment of protein localization to mitochondrion","3/304","58/18866",0.0668960246652359,0.0668960246652359,0.377499700010516,"ABLIM3/FZD5/YWHAZ",3
GO:0009165,"GO:0009165","nucleotide biosynthetic process","8/304","266/18866",0.0670405737636301,0.0670405737636301,0.37769008759745,"ADCY7/ELOVL7/HACD1/NME9/PDK4/PDP1/SLC25A13/TBPL1",8
GO:0030324,"GO:0030324","lung development","6/304","177/18866",0.0672480182219409,0.0672480182219409,0.378233599101346,"CREB1/CRISPLD2/GLI1/LIPA/PHF14/YWHAZ",6
GO:0006903,"GO:0006903","vesicle targeting","4/304","95/18866",0.0675385292645531,0.0675385292645531,0.378909464805711,"F5/F8/STARD3NL/TRAPPC6B",4
GO:0032543,"GO:0032543","mitochondrial translation","5/304","135/18866",0.0675905209610188,0.0675905209610188,0.378909464805711,"DARS2/MRPL19/MRPL50/MRPS7/RPUSD4",5
GO:0032388,"GO:0032388","positive regulation of intracellular transport","7/304","222/18866",0.0686440803450096,0.0686440803450096,0.381700043697592,"ABLIM3/CPSF6/FYN/FZD5/MYO1C/PRKN/YWHAZ",7
GO:0031023,"GO:0031023","microtubule organizing center organization","5/304","136/18866",0.0692934196253999,0.0692934196253999,0.381700043697592,"CETN2/FBXW11/KAT2B/PLK4/SSX2IP",5
GO:0071331,"GO:0071331","cellular response to hexose stimulus","5/304","136/18866",0.0692934196253999,0.0692934196253999,0.381700043697592,"FOXA2/FOXO3/GCLC/IRS2/WDR35",5
GO:0035249,"GO:0035249","synaptic transmission, glutamatergic","4/304","96/18866",0.0696246303420125,0.0696246303420125,0.381700043697592,"GRM8/PRKN/SHANK2/UNC13A",4
GO:0006636,"GO:0006636","unsaturated fatty acid biosynthetic process","3/304","59/18866",0.0696746736336653,0.0696746736336653,0.381700043697592,"EDN1/ELOVL7/FABP5",3
GO:0031102,"GO:0031102","neuron projection regeneration","3/304","59/18866",0.0696746736336653,0.0696746736336653,0.381700043697592,"EPHA4/JUN/SPP1",3
GO:0043525,"GO:0043525","positive regulation of neuron apoptotic process","3/304","59/18866",0.0696746736336653,0.0696746736336653,0.381700043697592,"BACE1/FOXO3/JUN",3
GO:0045454,"GO:0045454","cell redox homeostasis","3/304","59/18866",0.0696746736336653,0.0696746736336653,0.381700043697592,"ERO1A/GCLC/NME9",3
GO:0045815,"GO:0045815","positive regulation of gene expression, epigenetic","3/304","59/18866",0.0696746736336653,0.0696746736336653,0.381700043697592,"KAT2B/MYO1C/SMARCD1",3
GO:0071385,"GO:0071385","cellular response to glucocorticoid stimulus","3/304","59/18866",0.0696746736336653,0.0696746736336653,0.381700043697592,"ASS1/EDN1/FOXO3",3
GO:0008053,"GO:0008053","mitochondrial fusion","2/304","27/18866",0.0697681194757319,0.0697681194757319,0.381700043697592,"BNIP3/PRKN",2
GO:0035459,"GO:0035459","vesicle cargo loading","2/304","27/18866",0.0697681194757319,0.0697681194757319,0.381700043697592,"INSIG1/MIA3",2
GO:0051953,"GO:0051953","negative regulation of amine transport","2/304","27/18866",0.0697681194757319,0.0697681194757319,0.381700043697592,"RGS4/SLC43A1",2
GO:0090140,"GO:0090140","regulation of mitochondrial fission","2/304","27/18866",0.0697681194757319,0.0697681194757319,0.381700043697592,"BNIP3/PRKN",2
GO:1900078,"GO:1900078","positive regulation of cellular response to insulin stimulus","2/304","27/18866",0.0697681194757319,0.0697681194757319,0.381700043697592,"MYO1C/SORBS1",2
GO:0042552,"GO:0042552","myelination","5/304","137/18866",0.0710199129510144,0.0710199129510144,0.383307205639455,"ACER3/NAB2/POU3F2/QKI/SBF2",5
GO:0071326,"GO:0071326","cellular response to monosaccharide stimulus","5/304","137/18866",0.0710199129510144,0.0710199129510144,0.383307205639455,"FOXA2/FOXO3/GCLC/IRS2/WDR35",5
GO:0043583,"GO:0043583","ear development","7/304","224/18866",0.0712597820733429,0.0712597820733429,0.383307205639455,"ATG5/EDN1/EPHA4/INSIG1/MAFB/SOBP/WHRN",7
GO:1901216,"GO:1901216","positive regulation of neuron death","4/304","97/18866",0.0717436074001555,0.0717436074001555,0.383307205639455,"BACE1/FOXO3/FYN/JUN",4
GO:1901655,"GO:1901655","cellular response to ketone","4/304","97/18866",0.0717436074001555,0.0717436074001555,0.383307205639455,"ASS1/FDX1/FOXO3/SPP1",4
GO:1990823,"GO:1990823","response to leukemia inhibitory factor","4/304","97/18866",0.0717436074001555,0.0717436074001555,0.383307205639455,"CREB1/RNF138/SMAD7/WDR35",4
GO:1990830,"GO:1990830","cellular response to leukemia inhibitory factor","4/304","97/18866",0.0717436074001555,0.0717436074001555,0.383307205639455,"CREB1/RNF138/SMAD7/WDR35",4
GO:2001233,"GO:2001233","regulation of apoptotic signaling pathway","11/304","413/18866",0.0719780206622705,0.0719780206622705,0.383307205639455,"BNIP3/CCAR2/FYN/GCLC/PRKN/PTTG1IP/RTKN2/SKIL/WDR35/YBX3/YWHAZ",11
GO:0010823,"GO:0010823","negative regulation of mitochondrion organization","3/304","60/18866",0.0725047872725545,0.0725047872725545,0.383307205639455,"BNIP3/GCLC/PRKN",3
GO:1903428,"GO:1903428","positive regulation of reactive oxygen species biosynthetic process","3/304","60/18866",0.0725047872725545,0.0725047872725545,0.383307205639455,"ASS1/EDN1/FOXO3",3
GO:1903050,"GO:1903050","regulation of proteolysis involved in cellular protein catabolic process","7/304","225/18866",0.0725896346283126,0.0725896346283126,0.383307205639455,"CCAR2/EPHA4/GCLC/PRKN/RNF19B/SMAD7/USP13",7
GO:0033865,"GO:0033865","nucleoside bisphosphate metabolic process","5/304","138/18866",0.0727699392512587,0.0727699392512587,0.383307205639455,"DBI/ELOVL7/HACD1/PDK4/PDP1",5
GO:0033875,"GO:0033875","ribonucleoside bisphosphate metabolic process","5/304","138/18866",0.0727699392512587,0.0727699392512587,0.383307205639455,"DBI/ELOVL7/HACD1/PDK4/PDP1",5
GO:0034032,"GO:0034032","purine nucleoside bisphosphate metabolic process","5/304","138/18866",0.0727699392512587,0.0727699392512587,0.383307205639455,"DBI/ELOVL7/HACD1/PDK4/PDP1",5
GO:0008361,"GO:0008361","regulation of cell size","6/304","181/18866",0.0731748947753996,0.0731748947753996,0.383307205639455,"CREB1/DBN1/EDN1/FN1/SEMA5A/SPP1",6
GO:0030323,"GO:0030323","respiratory tube development","6/304","181/18866",0.0731748947753996,0.0731748947753996,0.383307205639455,"CREB1/CRISPLD2/GLI1/LIPA/PHF14/YWHAZ",6
GO:0050796,"GO:0050796","regulation of insulin secretion","6/304","181/18866",0.0731748947753996,0.0731748947753996,0.383307205639455,"ENSA/FOXA2/HNF4A/IRS2/PICK1/PRKN",6
GO:0001657,"GO:0001657","ureteric bud development","4/304","98/18866",0.0738952611381682,0.0738952611381682,0.383307205639455,"BMP7/GREB1L/SLIT2/SMAD7",4
GO:0042158,"GO:0042158","lipoprotein biosynthetic process","4/304","98/18866",0.0738952611381682,0.0738952611381682,0.383307205639455,"ATG10/ATG5/DBI/PIGM",4
GO:0050810,"GO:0050810","regulation of steroid biosynthetic process","4/304","98/18866",0.0738952611381682,0.0738952611381682,0.383307205639455,"FGFR4/IGFBP7/INSIG1/STARD4",4
GO:0001964,"GO:0001964","startle response","2/304","28/18866",0.0743599620031538,0.0743599620031538,0.383307205639455,"BACE1/PRKN",2
GO:0006760,"GO:0006760","folic acid-containing compound metabolic process","2/304","28/18866",0.0743599620031538,0.0743599620031538,0.383307205639455,"GCH1/GGH",2
GO:0007205,"GO:0007205","protein kinase C-activating G protein-coupled receptor signaling pathway","2/304","28/18866",0.0743599620031538,0.0743599620031538,0.383307205639455,"EDN1/PICK1",2
GO:0021680,"GO:0021680","cerebellar Purkinje cell layer development","2/304","28/18866",0.0743599620031538,0.0743599620031538,0.383307205639455,"AGTPBP1/WHRN",2
GO:0021846,"GO:0021846","cell proliferation in forebrain","2/304","28/18866",0.0743599620031538,0.0743599620031538,0.383307205639455,"DIXDC1/POU3F2",2
GO:0034311,"GO:0034311","diol metabolic process","2/304","28/18866",0.0743599620031538,0.0743599620031538,0.383307205639455,"ACER3/GCH1",2
GO:0048596,"GO:0048596","embryonic camera-type eye morphogenesis","2/304","28/18866",0.0743599620031538,0.0743599620031538,0.383307205639455,"BMP7/FZD5",2
GO:0051590,"GO:0051590","positive regulation of neurotransmitter transport","2/304","28/18866",0.0743599620031538,0.0743599620031538,0.383307205639455,"PRKN/UNC13A",2
GO:0071450,"GO:0071450","cellular response to oxygen radical","2/304","28/18866",0.0743599620031538,0.0743599620031538,0.383307205639455,"BMP7/GCH1",2
GO:0071451,"GO:0071451","cellular response to superoxide","2/304","28/18866",0.0743599620031538,0.0743599620031538,0.383307205639455,"BMP7/GCH1",2
GO:0072376,"GO:0072376","protein activation cascade","2/304","28/18866",0.0743599620031538,0.0743599620031538,0.383307205639455,"F8/FN1",2
GO:0072378,"GO:0072378","blood coagulation, fibrin clot formation","2/304","28/18866",0.0743599620031538,0.0743599620031538,0.383307205639455,"F8/FN1",2
GO:0090200,"GO:0090200","positive regulation of release of cytochrome c from mitochondria","2/304","28/18866",0.0743599620031538,0.0743599620031538,0.383307205639455,"BNIP3/WDR35",2
GO:1902668,"GO:1902668","negative regulation of axon guidance","2/304","28/18866",0.0743599620031538,0.0743599620031538,0.383307205639455,"SEMA5A/SLIT2",2
GO:2000191,"GO:2000191","regulation of fatty acid transport","2/304","28/18866",0.0743599620031538,0.0743599620031538,0.383307205639455,"EDN1/IRS2",2
GO:2000463,"GO:2000463","positive regulation of excitatory postsynaptic potential","2/304","28/18866",0.0743599620031538,0.0743599620031538,0.383307205639455,"RGS4/SHANK2",2
GO:0007272,"GO:0007272","ensheathment of neurons","5/304","139/18866",0.0745434312477718,0.0745434312477718,0.383307205639455,"ACER3/NAB2/POU3F2/QKI/SBF2",5
GO:0008366,"GO:0008366","axon ensheathment","5/304","139/18866",0.0745434312477718,0.0745434312477718,0.383307205639455,"ACER3/NAB2/POU3F2/QKI/SBF2",5
GO:0071346,"GO:0071346","cellular response to interferon-gamma","6/304","182/18866",0.0747019600974878,0.0747019600974878,0.383307205639455,"ASS1/CD58/EDN1/MED1/MYO1C/PDE12",6
GO:0045843,"GO:0045843","negative regulation of striated muscle tissue development","3/304","61/18866",0.075385631586052,0.075385631586052,0.383307205639455,"CXADR/RGS4/YBX3",3
GO:0061912,"GO:0061912","selective autophagy","3/304","61/18866",0.075385631586052,0.075385631586052,0.383307205639455,"ATG5/PRKN/RIPK2",3
GO:1902110,"GO:1902110","positive regulation of mitochondrial membrane permeability involved in apoptotic process","3/304","61/18866",0.075385631586052,0.075385631586052,0.383307205639455,"BNIP3/GCLC/YWHAZ",3
GO:0044839,"GO:0044839","cell cycle G2/M phase transition","8/304","273/18866",0.0753923327641325,0.0753923327641325,0.383307205639455,"BACH1/CCNH/CEP57/CETN2/ENSA/FBXW11/PLK4/TPX2",8
GO:0034612,"GO:0034612","response to tumor necrosis factor","9/304","320/18866",0.0754012739547106,0.0754012739547106,0.383307205639455,"ASS1/CD58/EDAR/EDN1/FOXO3/GCH1/PRKN/WDR35/YBX3",9
GO:0007018,"GO:0007018","microtubule-based movement","10/304","368/18866",0.0755229156217908,0.0755229156217908,0.383307205639455,"COPG2/DNAH9/DYNC1LI1/FBXW11/KIF3C/PLTP/RSPH4A/SPA17/SSX2IP/WDR35",10
GO:0007044,"GO:0007044","cell-substrate junction assembly","4/304","99/18866",0.076079382285527,0.076079382285527,0.383307205639455,"CD151/FN1/LAMC1/SORBS1",4
GO:0010717,"GO:0010717","regulation of epithelial to mesenchymal transition","4/304","99/18866",0.076079382285527,0.076079382285527,0.383307205639455,"BMP7/FOXA2/SMAD7/TGFB1I1",4
GO:0015837,"GO:0015837","amine transport","4/304","99/18866",0.076079382285527,0.076079382285527,0.383307205639455,"PRKN/RGS4/SLC43A1/SYT12",4
GO:0043255,"GO:0043255","regulation of carbohydrate biosynthetic process","4/304","99/18866",0.076079382285527,0.076079382285527,0.383307205639455,"IRS2/KAT2B/SLC35B4/SORBS1",4
GO:0072163,"GO:0072163","mesonephric epithelium development","4/304","99/18866",0.076079382285527,0.076079382285527,0.383307205639455,"BMP7/GREB1L/SLIT2/SMAD7",4
GO:0072164,"GO:0072164","mesonephric tubule development","4/304","99/18866",0.076079382285527,0.076079382285527,0.383307205639455,"BMP7/GREB1L/SLIT2/SMAD7",4
GO:1905037,"GO:1905037","autophagosome organization","4/304","99/18866",0.076079382285527,0.076079382285527,0.383307205639455,"ATG16L2/ATG5/ATP13A2/RAB33B",4
GO:0001959,"GO:0001959","regulation of cytokine-mediated signaling pathway","6/304","183/18866",0.0762471189476137,0.0762471189476137,0.383307205639455,"EDN1/MED1/PRKN/RIPK2/SLIT2/TRIM6",6
GO:0030177,"GO:0030177","positive regulation of Wnt signaling pathway","6/304","183/18866",0.0762471189476137,0.0762471189476137,0.383307205639455,"ANKRD6/CCAR2/DIXDC1/GPC5/SEMA5A/SMURF2",6
GO:1903034,"GO:1903034","regulation of response to wounding","6/304","183/18866",0.0762471189476137,0.0762471189476137,0.383307205639455,"CD109/CLDN3/EDN1/EPHA4/FOXA2/SPP1",6
GO:0048705,"GO:0048705","skeletal system morphogenesis","7/304","228/18866",0.0766671679893687,0.0766671679893687,0.384851236260097,"BMP7/INPPL1/INSIG1/NAB2/RAB33B/SP5/TIPARP",7
GO:0090090,"GO:0090090","negative regulation of canonical Wnt signaling pathway","6/304","184/18866",0.0778103430464008,0.0778103430464008,0.38654298030133,"ANKRD6/BICC1/FOXO3/GLI1/KREMEN2/PRKN",6
GO:1903322,"GO:1903322","positive regulation of protein modification by small protein conjugation or removal","5/304","141/18866",0.0781605156887399,0.0781605156887399,0.38654298030133,"DCUN1D5/PRKN/PTTG1IP/RIPK2/SMAD7",5
GO:0036503,"GO:0036503","ERAD pathway","4/304","100/18866",0.0782957518646638,0.0782957518646638,0.38654298030133,"FBXO27/PRKN/TMUB1/USP13",4
GO:0010676,"GO:0010676","positive regulation of cellular carbohydrate metabolic process","3/304","62/18866",0.0783164566314955,0.0783164566314955,0.38654298030133,"IRS2/KAT2B/SORBS1",3
GO:0048635,"GO:0048635","negative regulation of muscle organ development","3/304","62/18866",0.0783164566314955,0.0783164566314955,0.38654298030133,"CXADR/RGS4/YBX3",3
GO:0055025,"GO:0055025","positive regulation of cardiac muscle tissue development","3/304","62/18866",0.0783164566314955,0.0783164566314955,0.38654298030133,"CREB1/EDN1/GLI1",3
GO:0055081,"GO:0055081","anion homeostasis","3/304","62/18866",0.0783164566314955,0.0783164566314955,0.38654298030133,"FGFR4/HNF4A/KCTD7",3
GO:0060997,"GO:0060997","dendritic spine morphogenesis","3/304","62/18866",0.0783164566314955,0.0783164566314955,0.38654298030133,"DBN1/EPHA4/SHANK2",3
GO:0071384,"GO:0071384","cellular response to corticosteroid stimulus","3/304","62/18866",0.0783164566314955,0.0783164566314955,0.38654298030133,"ASS1/EDN1/FOXO3",3
GO:0140115,"GO:0140115","export across plasma membrane","3/304","62/18866",0.0783164566314955,0.0783164566314955,0.38654298030133,"FXYD2/KCNT2/SLC40A1",3
GO:0036293,"GO:0036293","response to decreased oxygen levels","10/304","371/18866",0.0787225108458616,0.0787225108458616,0.38654298030133,"BACH1/BMP7/BNIP3/CLDN3/CREB1/EDN1/ERO1A/FOXO3/PICK1/TBL2",10
GO:0051056,"GO:0051056","regulation of small GTPase mediated signal transduction","9/304","323/18866",0.0788501066647415,0.0788501066647415,0.38654298030133,"ARHGAP20/ARHGAP28/ARHGEF25/IQSEC1/IRS2/RASA2/SLIT2/SRGAP1/SSX2IP",9
GO:0001958,"GO:0001958","endochondral ossification","2/304","29/18866",0.0790455325529728,0.0790455325529728,0.38654298030133,"INPPL1/NAB2",2
GO:0006294,"GO:0006294","nucleotide-excision repair, preincision complex assembly","2/304","29/18866",0.0790455325529728,0.0790455325529728,0.38654298030133,"CCNH/CETN2",2
GO:0036075,"GO:0036075","replacement ossification","2/304","29/18866",0.0790455325529728,0.0790455325529728,0.38654298030133,"INPPL1/NAB2",2
GO:0036151,"GO:0036151","phosphatidylcholine acyl-chain remodeling","2/304","29/18866",0.0790455325529728,0.0790455325529728,0.38654298030133,"DBI/PLBD1",2
GO:0045671,"GO:0045671","negative regulation of osteoclast differentiation","2/304","29/18866",0.0790455325529728,0.0790455325529728,0.38654298030133,"FBN1/MAFB",2
GO:0048679,"GO:0048679","regulation of axon regeneration","2/304","29/18866",0.0790455325529728,0.0790455325529728,0.38654298030133,"EPHA4/SPP1",2
GO:0071692,"GO:0071692","protein localization to extracellular region","12/304","470/18866",0.0793237389961957,0.0793237389961957,0.387347710555997,"ATP13A2/COPG2/ENSA/FBN1/FOXA2/HNF4A/IRS2/M6PR/MIA3/PICK1/PRKN/SNX19",12
GO:0010001,"GO:0010001","glial cell differentiation","7/304","230/18866",0.0794587675709738,0.0794587675709738,0.387451983125989,"BNIP3/EPHA4/LDLR/NAB2/PICK1/POU3F2/PRDM8",7
GO:0072073,"GO:0072073","kidney epithelium development","5/304","142/18866",0.0800039462698087,0.0800039462698087,0.389553049656602,"BMP7/EPHA4/GREB1L/SLIT2/SMAD7",5
GO:0015908,"GO:0015908","fatty acid transport","4/304","101/18866",0.0805441414532231,0.0805441414532231,0.389955038913781,"EDN1/FABP5/IRS2/PROCA1",4
GO:0042632,"GO:0042632","cholesterol homeostasis","4/304","101/18866",0.0805441414532231,0.0805441414532231,0.389955038913781,"FGFR4/HNF4A/INSIG1/LDLR",4
GO:0044264,"GO:0044264","cellular polysaccharide metabolic process","4/304","101/18866",0.0805441414532231,0.0805441414532231,0.389955038913781,"EXT1/GYG1/IRS2/SORBS1",4
GO:0045639,"GO:0045639","positive regulation of myeloid cell differentiation","4/304","101/18866",0.0805441414532231,0.0805441414532231,0.389955038913781,"CREB1/FOXO3/JUN/MED1",4
GO:0051259,"GO:0051259","protein complex oligomerization","7/304","231/18866",0.080876508571115,0.080876508571115,0.391008786492378,"ATL3/CEP57/CPSF6/CRYZ/KCNS1/KCTD7/WDCP",7
GO:0046622,"GO:0046622","positive regulation of organ growth","3/304","63/18866",0.081296497633926,0.081296497633926,0.391373861639388,"EDN1/GLI1/YBX3",3
GO:0055008,"GO:0055008","cardiac muscle tissue morphogenesis","3/304","63/18866",0.081296497633926,0.081296497633926,0.391373861639388,"MED1/PKP2/SMAD7",3
GO:1902686,"GO:1902686","mitochondrial outer membrane permeabilization involved in programmed cell death","3/304","63/18866",0.081296497633926,0.081296497633926,0.391373861639388,"BNIP3/GCLC/YWHAZ",3
GO:0015980,"GO:0015980","energy derivation by oxidation of organic compounds","8/304","278/18866",0.0817258142712964,0.0817258142712964,0.392439615006855,"BNIP3/CAVIN3/COQ10B/GYG1/IRS2/NDUFB6/SLC25A13/SORBS1",8
GO:0008286,"GO:0008286","insulin receptor signaling pathway","5/304","143/18866",0.0818705189707286,0.0818705189707286,0.392439615006855,"FOXO3/IRS2/PDK4/SORBS1/TNS2",5
GO:0045598,"GO:0045598","regulation of fat cell differentiation","5/304","143/18866",0.0818705189707286,0.0818705189707286,0.392439615006855,"BMP7/CCDC71L/CREB1/INSIG1/TGFB1I1",5
GO:0061138,"GO:0061138","morphogenesis of a branching epithelium","6/304","187/18866",0.0826080749689742,0.0826080749689742,0.392439615006855,"BMP7/EDN1/FZD5/GREB1L/MED1/SLIT2",6
GO:0055092,"GO:0055092","sterol homeostasis","4/304","102/18866",0.0828243134457122,0.0828243134457122,0.392439615006855,"FGFR4/HNF4A/INSIG1/LDLR",4
GO:0060996,"GO:0060996","dendritic spine development","4/304","102/18866",0.0828243134457122,0.0828243134457122,0.392439615006855,"DBN1/EPHA4/IQSEC1/SHANK2",4
GO:2000060,"GO:2000060","positive regulation of ubiquitin-dependent protein catabolic process","4/304","102/18866",0.0828243134457122,0.0828243134457122,0.392439615006855,"GCLC/PRKN/RNF19B/SMAD7",4
GO:0043161,"GO:0043161","proteasome-mediated ubiquitin-dependent protein catabolic process","11/304","424/18866",0.0829793639803549,0.0829793639803549,0.392439615006855,"CCAR2/FBXL13/FBXO27/FBXW11/GCLC/KLHL15/PRKN/RNF19B/SMAD7/SMURF2/TMUB1",11
GO:0009266,"GO:0009266","response to temperature stimulus","7/304","233/18866",0.0837557983412144,0.0837557983412144,0.392439615006855,"CCAR2/ERO1A/GCLC/IER5/IGFBP7/MYOF/TGFB1I1",7
GO:0009743,"GO:0009743","response to carbohydrate","7/304","233/18866",0.0837557983412144,0.0837557983412144,0.392439615006855,"ENSA/FOXA2/FOXO3/GCLC/HNF4A/IRS2/WDR35",7
GO:2001234,"GO:2001234","negative regulation of apoptotic signaling pathway","7/304","233/18866",0.0837557983412144,0.0837557983412144,0.392439615006855,"CCAR2/FYN/GCLC/PRKN/PTTG1IP/RTKN2/YBX3",7
GO:0000303,"GO:0000303","response to superoxide","2/304","30/18866",0.0838206416734839,0.0838206416734839,0.392439615006855,"BMP7/GCH1",2
GO:0001516,"GO:0001516","prostaglandin biosynthetic process","2/304","30/18866",0.0838206416734839,0.0838206416734839,0.392439615006855,"EDN1/FABP5",2
GO:0005979,"GO:0005979","regulation of glycogen biosynthetic process","2/304","30/18866",0.0838206416734839,0.0838206416734839,0.392439615006855,"IRS2/SORBS1",2
GO:0010962,"GO:0010962","regulation of glucan biosynthetic process","2/304","30/18866",0.0838206416734839,0.0838206416734839,0.392439615006855,"IRS2/SORBS1",2
GO:0046457,"GO:0046457","prostanoid biosynthetic process","2/304","30/18866",0.0838206416734839,0.0838206416734839,0.392439615006855,"EDN1/FABP5",2
GO:0048265,"GO:0048265","response to pain","2/304","30/18866",0.0838206416734839,0.0838206416734839,0.392439615006855,"GCH1/SCN9A",2
GO:0090314,"GO:0090314","positive regulation of protein targeting to membrane","2/304","30/18866",0.0838206416734839,0.0838206416734839,0.392439615006855,"FYN/MYO1C",2
GO:0120033,"GO:0120033","negative regulation of plasma membrane bounded cell projection assembly","2/304","30/18866",0.0838206416734839,0.0838206416734839,0.392439615006855,"ODF2L/SLIT2",2
GO:1900746,"GO:1900746","regulation of vascular endothelial growth factor signaling pathway","2/304","30/18866",0.0838206416734839,0.0838206416734839,0.392439615006855,"ADAMTS3/MYO1C",2
GO:0031345,"GO:0031345","negative regulation of cell projection organization","6/304","188/18866",0.0842432120143758,0.0842432120143758,0.39318060694152,"EPHA4/FYN/ODF2L/SEMA5A/SLIT2/SPP1",6
GO:0030166,"GO:0030166","proteoglycan biosynthetic process","3/304","64/18866",0.0843249760625505,0.0843249760625505,0.39318060694152,"CHSY3/EXT1/VCAN",3
GO:1901862,"GO:1901862","negative regulation of muscle tissue development","3/304","64/18866",0.0843249760625505,0.0843249760625505,0.39318060694152,"CXADR/RGS4/YBX3",3
GO:0001823,"GO:0001823","mesonephros development","4/304","103/18866",0.085136021314353,0.085136021314353,0.395339792077836,"BMP7/GREB1L/SLIT2/SMAD7",4
GO:0042472,"GO:0042472","inner ear morphogenesis","4/304","103/18866",0.085136021314353,0.085136021314353,0.395339792077836,"INSIG1/MAFB/SOBP/WHRN",4
GO:1901570,"GO:1901570","fatty acid derivative biosynthetic process","4/304","103/18866",0.085136021314353,0.085136021314353,0.395339792077836,"EDN1/ELOVL7/FABP5/HACD1",4
GO:0071322,"GO:0071322","cellular response to carbohydrate stimulus","5/304","145/18866",0.0856727090543879,0.0856727090543879,0.397290700921028,"FOXA2/FOXO3/GCLC/IRS2/WDR35",5
GO:0006367,"GO:0006367","transcription initiation from RNA polymerase II promoter","6/304","189/18866",0.0858962241937971,0.0858962241937971,0.397786003918071,"CCNH/CREB1/HNF4A/KAT2B/MED1/RORB",6
GO:0000302,"GO:0000302","response to reactive oxygen species","7/304","235/18866",0.0866933742645553,0.0866933742645553,0.400348215151618,"BMP7/BNIP3/EDN1/FOXO3/FYN/GCH1/JUN",7
GO:0001505,"GO:0001505","regulation of neurotransmitter levels","7/304","235/18866",0.0866933742645553,0.0866933742645553,0.400348215151618,"BACE1/KCNMB4/MOXD1/PRKN/SYT12/UNC13A/VAMP1",7
GO:0032984,"GO:0032984","protein-containing complex disassembly","9/304","330/18866",0.0872662426157084,0.0872662426157084,0.400348215151618,"BNIP3/FZD5/MRPL19/MRPL50/MRPS7/PLEKHH2/SEMA5A/SMARCD1/TPX2",9
GO:0035794,"GO:0035794","positive regulation of mitochondrial membrane permeability","3/304","65/18866",0.0874011006701855,0.0874011006701855,0.400348215151618,"BNIP3/GCLC/YWHAZ",3
GO:0002027,"GO:0002027","regulation of heart rate","4/304","104/18866",0.0874790098689592,0.0874790098689592,0.400348215151618,"EDN1/GCH1/PKP2/RGS4",4
GO:0006575,"GO:0006575","cellular modified amino acid metabolic process","6/304","190/18866",0.0875670639239627,0.0875670639239627,0.400348215151618,"ASS1/GCH1/GCLC/GGH/MED1/SLC22A4",6
GO:0030308,"GO:0030308","negative regulation of cell growth","6/304","190/18866",0.0875670639239627,0.0875670639239627,0.400348215151618,"CCAR2/HNF4A/RGS4/SEMA5A/SLIT2/SPP1",6
GO:0099111,"GO:0099111","microtubule-based transport","6/304","190/18866",0.0875670639239627,0.0875670639239627,0.400348215151618,"COPG2/FBXW11/KIF3C/SPA17/SSX2IP/WDR35",6
GO:0000305,"GO:0000305","response to oxygen radical","2/304","31/18866",0.0886812097953977,0.0886812097953977,0.400348215151618,"BMP7/GCH1",2
GO:0006221,"GO:0006221","pyrimidine nucleotide biosynthetic process","2/304","31/18866",0.0886812097953977,0.0886812097953977,0.400348215151618,"NME9/TBPL1",2
GO:0008045,"GO:0008045","motor neuron axon guidance","2/304","31/18866",0.0886812097953977,0.0886812097953977,0.400348215151618,"EPHA4/SLIT2",2
GO:0010644,"GO:0010644","cell communication by electrical coupling","2/304","31/18866",0.0886812097953977,0.0886812097953977,0.400348215151618,"DBN1/PKP2",2
GO:0021799,"GO:0021799","cerebral cortex radially oriented cell migration","2/304","31/18866",0.0886812097953977,0.0886812097953977,0.400348215151618,"DIXDC1/POU3F2",2
GO:0048710,"GO:0048710","regulation of astrocyte differentiation","2/304","31/18866",0.0886812097953977,0.0886812097953977,0.400348215151618,"EPHA4/LDLR",2
GO:0050650,"GO:0050650","chondroitin sulfate proteoglycan biosynthetic process","2/304","31/18866",0.0886812097953977,0.0886812097953977,0.400348215151618,"CHSY3/VCAN",2
GO:0060261,"GO:0060261","positive regulation of transcription initiation from RNA polymerase II promoter","2/304","31/18866",0.0886812097953977,0.0886812097953977,0.400348215151618,"CREB1/MED1",2
GO:0060292,"GO:0060292","long-term synaptic depression","2/304","31/18866",0.0886812097953977,0.0886812097953977,0.400348215151618,"PICK1/SHANK2",2
GO:1902253,"GO:1902253","regulation of intrinsic apoptotic signaling pathway by p53 class mediator","2/304","31/18866",0.0886812097953977,0.0886812097953977,0.400348215151618,"PRKN/PTTG1IP",2
GO:1905476,"GO:1905476","negative regulation of protein localization to membrane","2/304","31/18866",0.0886812097953977,0.0886812097953977,0.400348215151618,"LYPLA1/PPP2R5A",2
GO:0007043,"GO:0007043","cell-cell junction assembly","5/304","147/18866",0.0895662716485827,0.0895662716485827,0.403275516370869,"CLDN3/FZD5/MYO1C/PKP2/SMAD7",5
GO:0051384,"GO:0051384","response to glucocorticoid","5/304","147/18866",0.0895662716485827,0.0895662716485827,0.403275516370869,"ASS1/EDN1/FOXO3/IGFBP7/SLIT2",5
GO:0043010,"GO:0043010","camera-type eye development","9/304","332/18866",0.0897656718678503,0.0897656718678503,0.403640113189973,"ACTL6A/BMP7/FBN1/FZD5/JUN/MED1/RORB/SKIL/TENM3",9
GO:0030099,"GO:0030099","myeloid cell differentiation","11/304","431/18866",0.0904966018497636,0.0904966018497636,0.404382884448192,"BPGM/CAMK4/CD109/CREB1/FBN1/FOXO3/JUN/KAT2B/KMT2E/MAFB/MED1",11
GO:0048207,"GO:0048207","vesicle targeting, rough ER to cis-Golgi","3/304","66/18866",0.0905240684966869,0.0905240684966869,0.404382884448192,"F5/F8/TRAPPC6B",3
GO:0048208,"GO:0048208","COPII vesicle coating","3/304","66/18866",0.0905240684966869,0.0905240684966869,0.404382884448192,"F5/F8/TRAPPC6B",3
GO:1902108,"GO:1902108","regulation of mitochondrial membrane permeability involved in apoptotic process","3/304","66/18866",0.0905240684966869,0.0905240684966869,0.404382884448192,"BNIP3/GCLC/YWHAZ",3
GO:1905207,"GO:1905207","regulation of cardiocyte differentiation","3/304","66/18866",0.0905240684966869,0.0905240684966869,0.404382884448192,"BMP7/EDN1/RGS4",3
GO:0048015,"GO:0048015","phosphatidylinositol-mediated signaling","6/304","192/18866",0.090962020124004,0.090962020124004,0.405807414110671,"EDN1/FYN/IRS2/PIK3AP1/PLCD1/PLCL1",6
GO:0051656,"GO:0051656","establishment of organelle localization","11/304","432/18866",0.0916033639763245,0.0916033639763245,0.407328339394908,"COPG2/F5/F8/FBXW11/KIF3C/MYO1C/MYO5B/PRKN/STARD3NL/TRAPPC6B/YWHAZ",11
GO:0010498,"GO:0010498","proteasomal protein catabolic process","12/304","483/18866",0.0923975947533903,0.0923975947533903,0.407328339394908,"CCAR2/FBXL13/FBXO27/FBXW11/GCLC/KLHL15/PRKN/RNF19B/SMAD7/SMURF2/TMUB1/USP13",12
GO:0030041,"GO:0030041","actin filament polymerization","6/304","193/18866",0.092686025937035,0.092686025937035,0.407328339394908,"ARHGAP28/DBN1/MYO1C/PICK1/SLIT2/WASHC3",6
GO:0061136,"GO:0061136","regulation of proteasomal protein catabolic process","6/304","193/18866",0.092686025937035,0.092686025937035,0.407328339394908,"CCAR2/GCLC/PRKN/RNF19B/SMAD7/USP13",6
GO:0042326,"GO:0042326","negative regulation of phosphorylation","12/304","484/18866",0.093455047295205,0.093455047295205,0.407328339394908,"BMP7/CD109/FOXA2/IRS2/JUN/KAT2B/PDE12/PPP2R5A/PRKN/RGS4/SLIT2/SMAD7",12
GO:0001654,"GO:0001654","eye development","10/304","384/18866",0.0935471441036555,0.0935471441036555,0.407328339394908,"ACTL6A/AGTPBP1/BMP7/FBN1/FZD5/JUN/MED1/RORB/SKIL/TENM3",10
GO:0002724,"GO:0002724","regulation of T cell cytokine production","2/304","32/18866",0.0936232647977979,0.0936232647977979,0.407328339394908,"FZD5/SMAD7",2
GO:0008210,"GO:0008210","estrogen metabolic process","2/304","32/18866",0.0936232647977979,0.0936232647977979,0.407328339394908,"CYP3A5/TIPARP",2
GO:0035456,"GO:0035456","response to interferon-beta","2/304","32/18866",0.0936232647977979,0.0936232647977979,0.407328339394908,"DDX41/TRIM6",2
GO:0046320,"GO:0046320","regulation of fatty acid oxidation","2/304","32/18866",0.0936232647977979,0.0936232647977979,0.407328339394908,"IRS2/PDK4",2
GO:0046949,"GO:0046949","fatty-acyl-CoA biosynthetic process","2/304","32/18866",0.0936232647977979,0.0936232647977979,0.407328339394908,"ELOVL7/HACD1",2
GO:0051385,"GO:0051385","response to mineralocorticoid","2/304","32/18866",0.0936232647977979,0.0936232647977979,0.407328339394908,"EDN1/FOXO3",2
GO:0070570,"GO:0070570","regulation of neuron projection regeneration","2/304","32/18866",0.0936232647977979,0.0936232647977979,0.407328339394908,"EPHA4/SPP1",2
GO:0086019,"GO:0086019","cell-cell signaling involved in cardiac conduction","2/304","32/18866",0.0936232647977979,0.0936232647977979,0.407328339394908,"CXADR/PKP2",2
GO:0097421,"GO:0097421","liver regeneration","2/304","32/18866",0.0936232647977979,0.0936232647977979,0.407328339394908,"GLI1/WDR35",2
GO:1901976,"GO:1901976","regulation of cell cycle checkpoint","2/304","32/18866",0.0936232647977979,0.0936232647977979,0.407328339394908,"CCAR2/DYNC1LI1",2
GO:1902547,"GO:1902547","regulation of cellular response to vascular endothelial growth factor stimulus","2/304","32/18866",0.0936232647977979,0.0936232647977979,0.407328339394908,"ADAMTS3/MYO1C",2
GO:1903955,"GO:1903955","positive regulation of protein targeting to mitochondrion","2/304","32/18866",0.0936232647977979,0.0936232647977979,0.407328339394908,"ABLIM3/FZD5",2
GO:0071300,"GO:0071300","cellular response to retinoic acid","3/304","67/18866",0.0936930658373463,0.0936930658373463,0.407328339394908,"CREB1/RORB/YES1",3
GO:1905710,"GO:1905710","positive regulation of membrane permeability","3/304","67/18866",0.0936930658373463,0.0936930658373463,0.407328339394908,"BNIP3/GCLC/YWHAZ",3
GO:0055017,"GO:0055017","cardiac muscle tissue growth","4/304","107/18866",0.0946929832345905,0.0946929832345905,0.410884356292038,"CXADR/EDN1/GLI1/RGS4",4
GO:0006066,"GO:0006066","alcohol metabolic process","10/304","385/18866",0.0947521151461596,0.0947521151461596,0.410884356292038,"ACER3/CYP3A5/FDX1/GCH1/INPPL1/INSIG1/LDLR/MOXD1/MYOF/PLCD1",10
GO:0016239,"GO:0016239","positive regulation of macroautophagy","3/304","68/18866",0.0969072691772162,0.0969072691772162,0.417046434869519,"BNIP3/PRKN/RIPK2",3
GO:0042446,"GO:0042446","hormone biosynthetic process","3/304","68/18866",0.0969072691772162,0.0969072691772162,0.417046434869519,"FDX1/MED1/STARD3NL",3
GO:0045428,"GO:0045428","regulation of nitric oxide biosynthetic process","3/304","68/18866",0.0969072691772162,0.0969072691772162,0.417046434869519,"ASS1/EDN1/WDR35",3
GO:0051298,"GO:0051298","centrosome duplication","3/304","68/18866",0.0969072691772162,0.0969072691772162,0.417046434869519,"CETN2/KAT2B/PLK4",3
GO:0098840,"GO:0098840","protein transport along microtubule","3/304","68/18866",0.0969072691772162,0.0969072691772162,0.417046434869519,"KIF3C/SSX2IP/WDR35",3
GO:0099118,"GO:0099118","microtubule-based protein transport","3/304","68/18866",0.0969072691772162,0.0969072691772162,0.417046434869519,"KIF3C/SSX2IP/WDR35",3
GO:0008593,"GO:0008593","regulation of Notch signaling pathway","4/304","108/18866",0.097158378410016,0.097158378410016,0.41707388213129,"BMP7/GDPD5/HEY1/KAT2B",4
GO:0032526,"GO:0032526","response to retinoic acid","4/304","108/18866",0.097158378410016,0.097158378410016,0.41707388213129,"CREB1/IGFBP7/RORB/YES1",4
GO:0048017,"GO:0048017","inositol lipid-mediated signaling","6/304","196/18866",0.0979634266375148,0.0979634266375148,0.41766046224415,"EDN1/FYN/IRS2/PIK3AP1/PLCD1/PLCL1",6
GO:0060759,"GO:0060759","regulation of response to cytokine stimulus","6/304","196/18866",0.0979634266375148,0.0979634266375148,0.41766046224415,"EDN1/MED1/PRKN/RIPK2/SLIT2/TRIM6",6
GO:0097193,"GO:0097193","intrinsic apoptotic signaling pathway","8/304","290/18866",0.0981739399513816,0.0981739399513816,0.41766046224415,"BNIP3/CCAR2/ERO1A/PRKN/PTTG1IP/RTKN2/SKIL/YBX3",8
GO:0150063,"GO:0150063","visual system development","10/304","388/18866",0.0984222892123831,0.0984222892123831,0.41766046224415,"ACTL6A/AGTPBP1/BMP7/FBN1/FZD5/JUN/MED1/RORB/SKIL/TENM3",10
GO:0010464,"GO:0010464","regulation of mesenchymal cell proliferation","2/304","33/18866",0.0986429396235991,0.0986429396235991,0.41766046224415,"IRS2/PHF14",2
GO:0030149,"GO:0030149","sphingolipid catabolic process","2/304","33/18866",0.0986429396235991,0.0986429396235991,0.41766046224415,"ACER3/GM2A",2
GO:0034331,"GO:0034331","cell junction maintenance","2/304","33/18866",0.0986429396235991,0.0986429396235991,0.41766046224415,"CLDN3/WHRN",2
GO:0040018,"GO:0040018","positive regulation of multicellular organism growth","2/304","33/18866",0.0986429396235991,0.0986429396235991,0.41766046224415,"CREB1/POU3F2",2
GO:0045920,"GO:0045920","negative regulation of exocytosis","2/304","33/18866",0.0986429396235991,0.0986429396235991,0.41766046224415,"PRKN/RAB33B",2
GO:0090022,"GO:0090022","regulation of neutrophil chemotaxis","2/304","33/18866",0.0986429396235991,0.0986429396235991,0.41766046224415,"EDN1/SLIT2",2
GO:1901797,"GO:1901797","negative regulation of signal transduction by p53 class mediator","2/304","33/18866",0.0986429396235991,0.0986429396235991,0.41766046224415,"PRKN/PTTG1IP",2
GO:0033138,"GO:0033138","positive regulation of peptidyl-serine phosphorylation","4/304","109/18866",0.0996536573909127,0.0996536573909127,0.420811207523215,"BRAF/RIPK2/SH2D3A/TRIM6",4
GO:0001837,"GO:0001837","epithelial to mesenchymal transition","5/304","152/18866",0.099693877040481,0.099693877040481,0.420811207523215,"BMP7/FOXA2/HEY1/SMAD7/TGFB1I1",5
GO:0048839,"GO:0048839","inner ear development","6/304","197/18866",0.0997574684665905,0.0997574684665905,0.420811207523215,"ATG5/EPHA4/INSIG1/MAFB/SOBP/WHRN",6
GO:0071230,"GO:0071230","cellular response to amino acid stimulus","3/304","69/18866",0.100165846092293,0.100165846092293,0.422011592800528,"ASS1/FYN/GCLC",3
GO:0010876,"GO:0010876","lipid localization","11/304","440/18866",0.100753117585113,0.100753117585113,0.423961786537488,"DBI/EDN1/FABP5/GM2A/IRS2/LDLR/PLTP/PRKN/PROCA1/SPP1/STARD4",11
GO:0001678,"GO:0001678","cellular glucose homeostasis","5/304","153/18866",0.101785871888115,0.101785871888115,0.424973038559217,"FOXA2/FOXO3/GCLC/IRS2/WDR35",5
GO:0045834,"GO:0045834","positive regulation of lipid metabolic process","5/304","153/18866",0.101785871888115,0.101785871888115,0.424973038559217,"CREB1/IRS2/LDLR/SORBS1/STARD4",5
GO:0006641,"GO:0006641","triglyceride metabolic process","4/304","110/18866",0.102178518394953,0.102178518394953,0.424973038559217,"FABP5/INSIG1/LDLR/SLC22A4",4
GO:0051402,"GO:0051402","neuron apoptotic process","7/304","245/18866",0.102248146716725,0.102248146716725,0.424973038559217,"BACE1/BNIP3/FOXO3/FYN/GCLC/JUN/PRKN",7
GO:0006901,"GO:0006901","vesicle coating","3/304","70/18866",0.103467956118478,0.103467956118478,0.424973038559217,"F5/F8/TRAPPC6B",3
GO:0009880,"GO:0009880","embryonic pattern specification","3/304","70/18866",0.103467956118478,0.103467956118478,0.424973038559217,"BMP7/CXXC4/FZD5",3
GO:0050771,"GO:0050771","negative regulation of axonogenesis","3/304","70/18866",0.103467956118478,0.103467956118478,0.424973038559217,"SEMA5A/SLIT2/SPP1",3
GO:0000038,"GO:0000038","very long-chain fatty acid metabolic process","2/304","34/18866",0.103736469943547,0.103736469943547,0.424973038559217,"ELOVL7/HACD1",2
GO:0006891,"GO:0006891","intra-Golgi vesicle-mediated transport","2/304","34/18866",0.103736469943547,0.103736469943547,0.424973038559217,"COPG2/RAB33B",2
GO:0007616,"GO:0007616","long-term memory","2/304","34/18866",0.103736469943547,0.103736469943547,0.424973038559217,"CAMK4/LDLR",2
GO:0019228,"GO:0019228","neuronal action potential","2/304","34/18866",0.103736469943547,0.103736469943547,0.424973038559217,"KCNMB4/SCN9A",2
GO:0032232,"GO:0032232","negative regulation of actin filament bundle assembly","2/304","34/18866",0.103736469943547,0.103736469943547,0.424973038559217,"ARHGAP28/PRKN",2
GO:0035633,"GO:0035633","maintenance of blood-brain barrier","2/304","34/18866",0.103736469943547,0.103736469943547,0.424973038559217,"CLDN3/LAMC1",2
GO:0042311,"GO:0042311","vasodilation","2/304","34/18866",0.103736469943547,0.103736469943547,0.424973038559217,"ATG5/GCH1",2
GO:0042558,"GO:0042558","pteridine-containing compound metabolic process","2/304","34/18866",0.103736469943547,0.103736469943547,0.424973038559217,"GCH1/GGH",2
GO:0045648,"GO:0045648","positive regulation of erythrocyte differentiation","2/304","34/18866",0.103736469943547,0.103736469943547,0.424973038559217,"FOXO3/MED1",2
GO:0055022,"GO:0055022","negative regulation of cardiac muscle tissue growth","2/304","34/18866",0.103736469943547,0.103736469943547,0.424973038559217,"CXADR/RGS4",2
GO:0055094,"GO:0055094","response to lipoprotein particle","2/304","34/18866",0.103736469943547,0.103736469943547,0.424973038559217,"LDLR/MIA3",2
GO:0061117,"GO:0061117","negative regulation of heart growth","2/304","34/18866",0.103736469943547,0.103736469943547,0.424973038559217,"CXADR/RGS4",2
GO:0098901,"GO:0098901","regulation of cardiac muscle cell action potential","2/304","34/18866",0.103736469943547,0.103736469943547,0.424973038559217,"CXADR/PKP2",2
GO:2000036,"GO:2000036","regulation of stem cell population maintenance","2/304","34/18866",0.103736469943547,0.103736469943547,0.424973038559217,"BMP7/LBH",2
GO:2000780,"GO:2000780","negative regulation of double-strand break repair","2/304","34/18866",0.103736469943547,0.103736469943547,0.424973038559217,"FANCB/KLHL15",2
GO:0002262,"GO:0002262","myeloid cell homeostasis","5/304","154/18866",0.103899704015019,0.103899704015019,0.425130778543793,"BPGM/FOXO3/KMT2E/MAFB/MED1",5
GO:0034976,"GO:0034976","response to endoplasmic reticulum stress","8/304","294/18866",0.104044922209398,0.104044922209398,0.425214512323653,"ATG10/ERO1A/FBXO27/JUN/PRKN/TBL2/TMUB1/USP13",8
GO:0007596,"GO:0007596","blood coagulation","9/304","343/18866",0.104262471375815,0.104262471375815,0.425593296331408,"CBX5/EDN1/F5/F8/FN1/FOXA2/FYN/HNF4A/YWHAZ",9
GO:0061387,"GO:0061387","regulation of extent of cell growth","4/304","111/18866",0.104732652755926,0.104732652755926,0.42700117051585,"DBN1/FN1/SEMA5A/SPP1",4
GO:0048880,"GO:0048880","sensory system development","10/304","394/18866",0.106010565306512,0.106010565306512,0.431280072635158,"ACTL6A/AGTPBP1/BMP7/FBN1/FZD5/JUN/MED1/RORB/SKIL/TENM3",10
GO:0048754,"GO:0048754","branching morphogenesis of an epithelial tube","5/304","155/18866",0.106035227246711,0.106035227246711,0.431280072635158,"BMP7/EDN1/GREB1L/MED1/SLIT2",5
GO:0042982,"GO:0042982","amyloid precursor protein metabolic process","3/304","71/18866",0.106812751589198,0.106812751589198,0.433052415506021,"BACE1/EPHA4/UNC13A",3
GO:0051348,"GO:0051348","negative regulation of transferase activity","8/304","296/18866",0.107052405176003,0.107052405176003,0.433052415506021,"BMP7/FOXA2/IRS2/KAT2B/PPP2R5A/PRKN/RGS4/SMAD7",8
GO:0001763,"GO:0001763","morphogenesis of a branching structure","6/304","201/18866",0.107106246744286,0.107106246744286,0.433052415506021,"BMP7/EDN1/FZD5/GREB1L/MED1/SLIT2",6
GO:0010952,"GO:0010952","positive regulation of peptidase activity","6/304","201/18866",0.107106246744286,0.107106246744286,0.433052415506021,"CLDN3/EPHA4/FN1/FYN/RIPK2/WDR35",6
GO:0031099,"GO:0031099","regeneration","6/304","201/18866",0.107106246744286,0.107106246744286,0.433052415506021,"EPHA4/GLI1/JUN/MED1/SPP1/WDR35",6
GO:0005976,"GO:0005976","polysaccharide metabolic process","4/304","112/18866",0.107315745170356,0.107315745170356,0.433112843171423,"EXT1/GYG1/IRS2/SORBS1",4
GO:0006865,"GO:0006865","amino acid transport","5/304","156/18866",0.108192291186503,0.108192291186503,0.433112843171423,"RGS4/SLC22A4/SLC25A13/SLC36A4/SLC43A1",5
GO:0048545,"GO:0048545","response to steroid hormone","9/304","346/18866",0.108434934828776,0.108434934828776,0.433112843171423,"ASS1/BMP7/EDN1/FOXO3/IGFBP7/LBH/MED1/SLIT2/SPP1",9
GO:0071356,"GO:0071356","cellular response to tumor necrosis factor","8/304","297/18866",0.108574042486766,0.108574042486766,0.433112843171423,"ASS1/CD58/EDAR/EDN1/FOXO3/PRKN/WDR35/YBX3",8
GO:0006631,"GO:0006631","fatty acid metabolic process","10/304","396/18866",0.108613136524045,0.108613136524045,0.433112843171423,"EDN1/ELOVL7/FABP5/HACD1/INSIG1/IRS2/LYPLA1/PDK4/PDP1/QKI",10
GO:0070482,"GO:0070482","response to oxygen levels","10/304","396/18866",0.108613136524045,0.108613136524045,0.433112843171423,"BACH1/BMP7/BNIP3/CLDN3/CREB1/EDN1/ERO1A/FOXO3/PICK1/TBL2",10
GO:0003203,"GO:0003203","endocardial cushion morphogenesis","2/304","35/18866",0.108900191867824,0.108900191867824,0.433112843171423,"BMP7/HEY1",2
GO:0007435,"GO:0007435","salivary gland morphogenesis","2/304","35/18866",0.108900191867824,0.108900191867824,0.433112843171423,"BMP7/EDAR",2
GO:0014046,"GO:0014046","dopamine secretion","2/304","35/18866",0.108900191867824,0.108900191867824,0.433112843171423,"PRKN/SYT12",2
GO:0014059,"GO:0014059","regulation of dopamine secretion","2/304","35/18866",0.108900191867824,0.108900191867824,0.433112843171423,"PRKN/SYT12",2
GO:0039694,"GO:0039694","viral RNA genome replication","2/304","35/18866",0.108900191867824,0.108900191867824,0.433112843171423,"ATG16L2/ATG5",2
GO:0048821,"GO:0048821","erythrocyte development","2/304","35/18866",0.108900191867824,0.108900191867824,0.433112843171423,"BPGM/MED1",2
GO:0098751,"GO:0098751","bone cell development","2/304","35/18866",0.108900191867824,0.108900191867824,0.433112843171423,"FBN1/MED1",2
GO:1901223,"GO:1901223","negative regulation of NIK/NF-kappaB signaling","2/304","35/18866",0.108900191867824,0.108900191867824,0.433112843171423,"BMP7/FBXW11",2
GO:0010506,"GO:0010506","regulation of autophagy","9/304","347/18866",0.109846417241254,0.109846417241254,0.436366947647135,"ATG5/ATP13A2/BNIP3/FOXO3/FZD5/PRKN/RIPK2/TRIM6/USP13",9
GO:0045600,"GO:0045600","positive regulation of fat cell differentiation","3/304","72/18866",0.110199378442563,0.110199378442563,0.436751024965751,"BMP7/CCDC71L/CREB1",3
GO:0061515,"GO:0061515","myeloid cell development","3/304","72/18866",0.110199378442563,0.110199378442563,0.436751024965751,"BPGM/FBN1/MED1",3
GO:0007599,"GO:0007599","hemostasis","9/304","348/18866",0.111268194039298,0.111268194039298,0.440474860687386,"CBX5/EDN1/F5/F8/FN1/FOXA2/FYN/HNF4A/YWHAZ",9
GO:0003279,"GO:0003279","cardiac septum development","4/304","114/18866",0.112567511223398,0.112567511223398,0.442553963909541,"BMP7/HEY1/SLIT2/SMAD7",4
GO:0035051,"GO:0035051","cardiocyte differentiation","5/304","158/18866",0.112570419016249,0.112570419016249,0.442553963909541,"ATG5/BMP7/CXADR/EDN1/RGS4",5
GO:0050817,"GO:0050817","coagulation","9/304","349/18866",0.112700241940161,0.112700241940161,0.442553963909541,"CBX5/EDN1/F5/F8/FN1/FOXA2/FYN/HNF4A/YWHAZ",9
GO:1904062,"GO:1904062","regulation of cation transmembrane transport","9/304","349/18866",0.112700241940161,0.112700241940161,0.442553963909541,"ATG5/FXYD2/FYN/KCNS1/NETO2/RGS4/SHANK2/SLC43A1/TRPC1",9
GO:0005977,"GO:0005977","glycogen metabolic process","3/304","73/18866",0.113626976998901,0.113626976998901,0.442553963909541,"GYG1/IRS2/SORBS1",3
GO:0051966,"GO:0051966","regulation of synaptic transmission, glutamatergic","3/304","73/18866",0.113626976998901,0.113626976998901,0.442553963909541,"GRM8/SHANK2/UNC13A",3
GO:1903779,"GO:1903779","regulation of cardiac conduction","3/304","73/18866",0.113626976998901,0.113626976998901,0.442553963909541,"CXADR/FXYD2/TRPC1",3
GO:0021955,"GO:0021955","central nervous system neuron axonogenesis","2/304","36/18866",0.114130539704343,0.114130539704343,0.442553963909541,"EPHA4/SLIT2",2
GO:0034405,"GO:0034405","response to fluid shear stress","2/304","36/18866",0.114130539704343,0.114130539704343,0.442553963909541,"ASS1/SMAD7",2
GO:0045622,"GO:0045622","regulation of T-helper cell differentiation","2/304","36/18866",0.114130539704343,0.114130539704343,0.442553963909541,"RIPK2/SMAD7",2
GO:0045738,"GO:0045738","negative regulation of DNA repair","2/304","36/18866",0.114130539704343,0.114130539704343,0.442553963909541,"FANCB/KLHL15",2
GO:0050931,"GO:0050931","pigment cell differentiation","2/304","36/18866",0.114130539704343,0.114130539704343,0.442553963909541,"RAB32/USP13",2
GO:0051955,"GO:0051955","regulation of amino acid transport","2/304","36/18866",0.114130539704343,0.114130539704343,0.442553963909541,"RGS4/SLC43A1",2
GO:0070873,"GO:0070873","regulation of glycogen metabolic process","2/304","36/18866",0.114130539704343,0.114130539704343,0.442553963909541,"IRS2/SORBS1",2
GO:0071402,"GO:0071402","cellular response to lipoprotein particle stimulus","2/304","36/18866",0.114130539704343,0.114130539704343,0.442553963909541,"LDLR/MIA3",2
GO:0090313,"GO:0090313","regulation of protein targeting to membrane","2/304","36/18866",0.114130539704343,0.114130539704343,0.442553963909541,"FYN/MYO1C",2
GO:0097484,"GO:0097484","dendrite extension","2/304","36/18866",0.114130539704343,0.114130539704343,0.442553963909541,"PRKN/UNC13A",2
GO:1901661,"GO:1901661","quinone metabolic process","2/304","36/18866",0.114130539704343,0.114130539704343,0.442553963909541,"CBR3/COQ10B",2
GO:2000058,"GO:2000058","regulation of ubiquitin-dependent protein catabolic process","5/304","159/18866",0.114791161788454,0.114791161788454,0.44460978692705,"CCAR2/GCLC/PRKN/RNF19B/SMAD7",5
GO:0048640,"GO:0048640","negative regulation of developmental growth","4/304","115/18866",0.115235523256557,0.115235523256557,0.445318802130005,"CXADR/RGS4/SEMA5A/SPP1",4
GO:0060419,"GO:0060419","heart growth","4/304","115/18866",0.115235523256557,0.115235523256557,0.445318802130005,"CXADR/EDN1/GLI1/RGS4",4
GO:0051896,"GO:0051896","regulation of protein kinase B signaling","7/304","253/18866",0.115714216735933,0.115714216735933,0.446662256411695,"CAVIN3/FGFR4/FYN/IRS2/PHLPP2/PIK3AP1/SEMA5A",7
GO:0035637,"GO:0035637","multicellular organismal signaling","6/304","206/18866",0.11667448030695,0.11667448030695,0.44843593449247,"CXADR/FXYD2/KCNMB4/PKP2/SCN9A/TRPC1",6
GO:0042594,"GO:0042594","response to starvation","6/304","206/18866",0.11667448030695,0.11667448030695,0.44843593449247,"ATG5/FOXO3/JUN/PDK4/PICK1/TBL2",6
GO:0071383,"GO:0071383","cellular response to steroid hormone stimulus","6/304","206/18866",0.11667448030695,0.11667448030695,0.44843593449247,"ASS1/BMP7/EDN1/FOXO3/LBH/MED1",6
GO:0006073,"GO:0006073","cellular glucan metabolic process","3/304","74/18866",0.117094682709507,0.117094682709507,0.44843593449247,"GYG1/IRS2/SORBS1",3
GO:0006801,"GO:0006801","superoxide metabolic process","3/304","74/18866",0.117094682709507,0.117094682709507,0.44843593449247,"BMP7/EDN1/GCH1",3
GO:0044042,"GO:0044042","glucan metabolic process","3/304","74/18866",0.117094682709507,0.117094682709507,0.44843593449247,"GYG1/IRS2/SORBS1",3
GO:0048199,"GO:0048199","vesicle targeting, to, from or within Golgi","3/304","74/18866",0.117094682709507,0.117094682709507,0.44843593449247,"F5/F8/TRAPPC6B",3
GO:0045926,"GO:0045926","negative regulation of growth","7/304","254/18866",0.117460003943608,0.117460003943608,0.448826401663208,"CCAR2/CXADR/HNF4A/RGS4/SEMA5A/SLIT2/SPP1",7
GO:2000027,"GO:2000027","regulation of animal organ morphogenesis","7/304","254/18866",0.117460003943608,0.117460003943608,0.448826401663208,"ANKRD6/BMP7/EDN1/FZD5/GLI1/MED1/SMURF2",7
GO:0006354,"GO:0006354","DNA-templated transcription, elongation","4/304","116/18866",0.117931170609049,0.117931170609049,0.45012215528037,"CCAR2/CCNH/ELL2/TCEA1",4
GO:0010970,"GO:0010970","transport along microtubule","5/304","161/18866",0.119295173085539,0.119295173085539,0.450273700167696,"COPG2/FBXW11/KIF3C/SSX2IP/WDR35",5
GO:0007389,"GO:0007389","pattern specification process","11/304","455/18866",0.119317459302606,0.119317459302606,0.450273700167696,"BICC1/BMP7/CXXC4/DZIP1L/EDN1/FOXA2/FZD5/GLI1/GPR161/HEY1/MAFB",11
GO:0003091,"GO:0003091","renal water homeostasis","2/304","37/18866",0.119424043762822,0.119424043762822,0.450273700167696,"ADCY7/MYO5B",2
GO:0006699,"GO:0006699","bile acid biosynthetic process","2/304","37/18866",0.119424043762822,0.119424043762822,0.450273700167696,"FGFR4/STARD4",2
GO:0043243,"GO:0043243","positive regulation of protein-containing complex disassembly","2/304","37/18866",0.119424043762822,0.119424043762822,0.450273700167696,"BNIP3/SEMA5A",2
GO:0048846,"GO:0048846","axon extension involved in axon guidance","2/304","37/18866",0.119424043762822,0.119424043762822,0.450273700167696,"SEMA5A/SLIT2",2
GO:0060260,"GO:0060260","regulation of transcription initiation from RNA polymerase II promoter","2/304","37/18866",0.119424043762822,0.119424043762822,0.450273700167696,"CREB1/MED1",2
GO:0090322,"GO:0090322","regulation of superoxide metabolic process","2/304","37/18866",0.119424043762822,0.119424043762822,0.450273700167696,"BMP7/GCH1",2
GO:0097502,"GO:0097502","mannosylation","2/304","37/18866",0.119424043762822,0.119424043762822,0.450273700167696,"B4GAT1/PIGM",2
GO:1902284,"GO:1902284","neuron projection extension involved in neuron projection guidance","2/304","37/18866",0.119424043762822,0.119424043762822,0.450273700167696,"SEMA5A/SLIT2",2
GO:1905314,"GO:1905314","semi-lunar valve development","2/304","37/18866",0.119424043762822,0.119424043762822,0.450273700167696,"HEY1/SLIT2",2
GO:0008344,"GO:0008344","adult locomotory behavior","3/304","75/18866",0.120601626877397,0.120601626877397,0.450427166690017,"EPHA4/FOXA2/PRKN",3
GO:0009064,"GO:0009064","glutamine family amino acid metabolic process","3/304","75/18866",0.120601626877397,0.120601626877397,0.450427166690017,"ASL/ASS1/GCLC",3
GO:0015909,"GO:0015909","long-chain fatty acid transport","3/304","75/18866",0.120601626877397,0.120601626877397,0.450427166690017,"FABP5/IRS2/PROCA1",3
GO:0031100,"GO:0031100","animal organ regeneration","3/304","75/18866",0.120601626877397,0.120601626877397,0.450427166690017,"GLI1/MED1/WDR35",3
GO:0048844,"GO:0048844","artery morphogenesis","3/304","75/18866",0.120601626877397,0.120601626877397,0.450427166690017,"HEY1/LDLR/SMAD7",3
GO:0050805,"GO:0050805","negative regulation of synaptic transmission","3/304","75/18866",0.120601626877397,0.120601626877397,0.450427166690017,"PICK1/PRKN/SHANK2",3
GO:0099518,"GO:0099518","vesicle cytoskeletal trafficking","3/304","75/18866",0.120601626877397,0.120601626877397,0.450427166690017,"FBXW11/MYO1C/MYO5B",3
GO:1900076,"GO:1900076","regulation of cellular response to insulin stimulus","3/304","75/18866",0.120601626877397,0.120601626877397,0.450427166690017,"MYO1C/SORBS1/TNS2",3
GO:0018107,"GO:0018107","peptidyl-threonine phosphorylation","4/304","117/18866",0.120654108409075,0.120654108409075,0.450427166690017,"BMP7/RIPK2/SMAD7/TRIM6",4
GO:0003002,"GO:0003002","regionalization","9/304","355/18866",0.121506791122885,0.121506791122885,0.45288453241367,"CXXC4/DZIP1L/EDN1/FOXA2/FZD5/GLI1/GPR161/HEY1/MAFB",9
GO:0043467,"GO:0043467","regulation of generation of precursor metabolites and energy","5/304","162/18866",0.121578097529519,0.121578097529519,0.45288453241367,"BNIP3/CAVIN3/IRS2/PDE12/SORBS1",5
GO:0043547,"GO:0043547","positive regulation of GTPase activity","10/304","406/18866",0.122169218437915,0.122169218437915,0.454589668239449,"ALS2CL/ARHGAP20/ARHGAP28/DEPDC1/IQSEC1/JUN/RANBP3L/RASA2/RGS4/SRGAP1",10
GO:0006979,"GO:0006979","response to oxidative stress","11/304","458/18866",0.123248415962355,0.123248415962355,0.455346544262117,"ATP13A2/BMP7/BNIP3/EDN1/ERO1A/FOXO3/FYN/GCH1/GCLC/JUN/PRKN",11
GO:0006805,"GO:0006805","xenobiotic metabolic process","4/304","118/18866",0.123403986577222,0.123403986577222,0.455346544262117,"CBR3/CRYZ/CYP3A5/HNF4A",4
GO:0021987,"GO:0021987","cerebral cortex development","4/304","118/18866",0.123403986577222,0.123403986577222,0.455346544262117,"BNIP3/DIXDC1/POU3F2/SLIT2",4
GO:0003281,"GO:0003281","ventricular septum development","3/304","76/18866",0.124146937350877,0.124146937350877,0.455346544262117,"HEY1/SLIT2/SMAD7",3
GO:0060415,"GO:0060415","muscle tissue morphogenesis","3/304","76/18866",0.124146937350877,0.124146937350877,0.455346544262117,"MED1/PKP2/SMAD7",3
GO:0071229,"GO:0071229","cellular response to acid chemical","3/304","76/18866",0.124146937350877,0.124146937350877,0.455346544262117,"ASS1/FYN/GCLC",3
GO:1903524,"GO:1903524","positive regulation of blood circulation","3/304","76/18866",0.124146937350877,0.124146937350877,0.455346544262117,"EDN1/GCH1/RGS4",3
GO:0042063,"GO:0042063","gliogenesis","8/304","307/18866",0.124438258886877,0.124438258886877,0.455346544262117,"BNIP3/CREB1/EPHA4/LDLR/NAB2/PICK1/POU3F2/PRDM8",8
GO:0003007,"GO:0003007","heart morphogenesis","7/304","258/18866",0.124579566931638,0.124579566931638,0.455346544262117,"BMP7/HEY1/JUN/MED1/PKP2/SLIT2/SMAD7",7
GO:0003298,"GO:0003298","physiological muscle hypertrophy","2/304","38/18866",0.12477732820376,0.12477732820376,0.455346544262117,"EDN1/RGS4",2
GO:0003301,"GO:0003301","physiological cardiac muscle hypertrophy","2/304","38/18866",0.12477732820376,0.12477732820376,0.455346544262117,"EDN1/RGS4",2
GO:0006084,"GO:0006084","acetyl-CoA metabolic process","2/304","38/18866",0.12477732820376,0.12477732820376,0.455346544262117,"PDK4/PDP1",2
GO:0030224,"GO:0030224","monocyte differentiation","2/304","38/18866",0.12477732820376,0.12477732820376,0.455346544262117,"JUN/MED1",2
GO:0032885,"GO:0032885","regulation of polysaccharide biosynthetic process","2/304","38/18866",0.12477732820376,0.12477732820376,0.455346544262117,"IRS2/SORBS1",2
GO:0046466,"GO:0046466","membrane lipid catabolic process","2/304","38/18866",0.12477732820376,0.12477732820376,0.455346544262117,"ACER3/GM2A",2
GO:0051930,"GO:0051930","regulation of sensory perception of pain","2/304","38/18866",0.12477732820376,0.12477732820376,0.455346544262117,"EDN1/FABP5",2
GO:0061049,"GO:0061049","cell growth involved in cardiac muscle cell development","2/304","38/18866",0.12477732820376,0.12477732820376,0.455346544262117,"EDN1/RGS4",2
GO:1903131,"GO:1903131","mononuclear cell differentiation","2/304","38/18866",0.12477732820376,0.12477732820376,0.455346544262117,"JUN/MED1",2
GO:0032386,"GO:0032386","regulation of intracellular transport","9/304","358/18866",0.126046531486961,0.126046531486961,0.459486258322298,"ABLIM3/ATP13A2/CPSF6/FYN/FZD5/INSIG1/MYO1C/PRKN/YWHAZ",9
GO:0031960,"GO:0031960","response to corticosteroid","5/304","164/18866",0.126204896628177,0.126204896628177,0.459572036979349,"ASS1/EDN1/FOXO3/IGFBP7/SLIT2",5
GO:0001666,"GO:0001666","response to hypoxia","9/304","359/18866",0.127579788609653,0.127579788609653,0.462703318939686,"BACH1/BMP7/BNIP3/CLDN3/CREB1/EDN1/ERO1A/FOXO3/TBL2",9
GO:0046902,"GO:0046902","regulation of mitochondrial membrane permeability","3/304","77/18866",0.127729739190668,0.127729739190668,0.462703318939686,"BNIP3/GCLC/YWHAZ",3
GO:0070830,"GO:0070830","bicellular tight junction assembly","3/304","77/18866",0.127729739190668,0.127729739190668,0.462703318939686,"CLDN3/FZD5/MYO1C",3
GO:1903201,"GO:1903201","regulation of oxidative stress-induced cell death","3/304","77/18866",0.127729739190668,0.127729739190668,0.462703318939686,"FOXO3/FYN/PRKN",3
GO:0009306,"GO:0009306","protein secretion","11/304","462/18866",0.128601246852901,0.128601246852901,0.462703318939686,"ATP13A2/COPG2/ENSA/FOXA2/HNF4A/IRS2/M6PR/MIA3/PICK1/PRKN/SNX19",11
GO:1901215,"GO:1901215","negative regulation of neuron death","6/304","212/18866",0.128701796214607,0.128701796214607,0.462703318939686,"ATP13A2/CREB1/FYN/GCLC/JUN/PRKN",6
GO:0070997,"GO:0070997","neuron death","9/304","360/18866",0.12912299473924,0.12912299473924,0.462703318939686,"ATP13A2/BACE1/BNIP3/CREB1/FOXO3/FYN/GCLC/JUN/PRKN",9
GO:0016236,"GO:0016236","macroautophagy","8/304","310/18866",0.129423546948206,0.129423546948206,0.462703318939686,"ATG10/ATG16L2/ATG5/ATP13A2/BNIP3/PRKN/RAB33B/RIPK2",8
GO:0035592,"GO:0035592","establishment of protein localization to extracellular region","11/304","463/18866",0.129959252333489,0.129959252333489,0.462703318939686,"ATP13A2/COPG2/ENSA/FOXA2/HNF4A/IRS2/M6PR/MIA3/PICK1/PRKN/SNX19",11
GO:0000578,"GO:0000578","embryonic axis specification","2/304","39/18866",0.130187108931439,0.130187108931439,0.462703318939686,"CXXC4/FZD5",2
GO:0001825,"GO:0001825","blastocyst formation","2/304","39/18866",0.130187108931439,0.130187108931439,0.462703318939686,"ACTL6A/SKIL",2
GO:0007431,"GO:0007431","salivary gland development","2/304","39/18866",0.130187108931439,0.130187108931439,0.462703318939686,"BMP7/EDAR",2
GO:0010837,"GO:0010837","regulation of keratinocyte proliferation","2/304","39/18866",0.130187108931439,0.130187108931439,0.462703318939686,"CD109/MED1",2
GO:0014037,"GO:0014037","Schwann cell differentiation","2/304","39/18866",0.130187108931439,0.130187108931439,0.462703318939686,"NAB2/POU3F2",2
GO:0030204,"GO:0030204","chondroitin sulfate metabolic process","2/304","39/18866",0.130187108931439,0.130187108931439,0.462703318939686,"CHSY3/VCAN",2
GO:0031076,"GO:0031076","embryonic camera-type eye development","2/304","39/18866",0.130187108931439,0.130187108931439,0.462703318939686,"BMP7/FZD5",2
GO:0033146,"GO:0033146","regulation of intracellular estrogen receptor signaling pathway","2/304","39/18866",0.130187108931439,0.130187108931439,0.462703318939686,"LBH/MED1",2
GO:0046326,"GO:0046326","positive regulation of glucose import","2/304","39/18866",0.130187108931439,0.130187108931439,0.462703318939686,"IRS2/SORBS1",2
GO:0050775,"GO:0050775","positive regulation of dendrite morphogenesis","2/304","39/18866",0.130187108931439,0.130187108931439,0.462703318939686,"DBN1/EPHA4",2
GO:0051931,"GO:0051931","regulation of sensory perception","2/304","39/18866",0.130187108931439,0.130187108931439,0.462703318939686,"EDN1/FABP5",2
GO:0055069,"GO:0055069","zinc ion homeostasis","2/304","39/18866",0.130187108931439,0.130187108931439,0.462703318939686,"ATP13A2/PRKN",2
GO:1902116,"GO:1902116","negative regulation of organelle assembly","2/304","39/18866",0.130187108931439,0.130187108931439,0.462703318939686,"KAT2B/ODF2L",2
GO:1902229,"GO:1902229","regulation of intrinsic apoptotic signaling pathway in response to DNA damage","2/304","39/18866",0.130187108931439,0.130187108931439,0.462703318939686,"CCAR2/SKIL",2
GO:0090276,"GO:0090276","regulation of peptide hormone secretion","6/304","213/18866",0.130762764943285,0.130762764943285,0.464265167638548,"ENSA/FOXA2/HNF4A/IRS2/PICK1/PRKN",6
GO:0060998,"GO:0060998","regulation of dendritic spine development","3/304","78/18866",0.131349155311364,0.131349155311364,0.465377574021444,"DBN1/EPHA4/SHANK2",3
GO:0061045,"GO:0061045","negative regulation of wound healing","3/304","78/18866",0.131349155311364,0.131349155311364,0.465377574021444,"CD109/CLDN3/EDN1",3
GO:0016079,"GO:0016079","synaptic vesicle exocytosis","4/304","121/18866",0.131811689173864,0.131811689173864,0.466531398092553,"BACE1/SYT12/UNC13A/VAMP1",4
GO:0043523,"GO:0043523","regulation of neuron apoptotic process","6/304","214/18866",0.13283955869892,0.13283955869892,0.469681689306731,"BACE1/FOXO3/FYN/GCLC/JUN/PRKN",6
GO:0021782,"GO:0021782","glial cell development","4/304","122/18866",0.134665731827824,0.134665731827824,0.470787488744852,"LDLR/PICK1/POU3F2/PRDM8",4
GO:0043244,"GO:0043244","regulation of protein-containing complex disassembly","4/304","122/18866",0.134665731827824,0.134665731827824,0.470787488744852,"BNIP3/PLEKHH2/SEMA5A/TPX2",4
GO:0007492,"GO:0007492","endoderm development","3/304","79/18866",0.135004307097932,0.135004307097932,0.470787488744852,"EXT1/FN1/LAMC1",3
GO:0120192,"GO:0120192","tight junction assembly","3/304","79/18866",0.135004307097932,0.135004307097932,0.470787488744852,"CLDN3/FZD5/MYO1C",3
GO:0008207,"GO:0008207","C21-steroid hormone metabolic process","2/304","40/18866",0.135650191530101,0.135650191530101,0.470787488744852,"FDX1/STARD3NL",2
GO:0010719,"GO:0010719","negative regulation of epithelial to mesenchymal transition","2/304","40/18866",0.135650191530101,0.135650191530101,0.470787488744852,"FOXA2/SMAD7",2
GO:0010939,"GO:0010939","regulation of necrotic cell death","2/304","40/18866",0.135650191530101,0.135650191530101,0.470787488744852,"BNIP3/YBX3",2
GO:0034142,"GO:0034142","toll-like receptor 4 signaling pathway","2/304","40/18866",0.135650191530101,0.135650191530101,0.470787488744852,"PIK3AP1/RIPK2",2
GO:0045740,"GO:0045740","positive regulation of DNA replication","2/304","40/18866",0.135650191530101,0.135650191530101,0.470787488744852,"GLI1/JUN",2
GO:0140353,"GO:0140353","lipid export from cell","2/304","40/18866",0.135650191530101,0.135650191530101,0.470787488744852,"EDN1/SPP1",2
GO:1902895,"GO:1902895","positive regulation of pri-miRNA transcription by RNA polymerase II","2/304","40/18866",0.135650191530101,0.135650191530101,0.470787488744852,"FOXO3/JUN",2
GO:1902991,"GO:1902991","regulation of amyloid precursor protein catabolic process","2/304","40/18866",0.135650191530101,0.135650191530101,0.470787488744852,"EPHA4/UNC13A",2
GO:1903427,"GO:1903427","negative regulation of reactive oxygen species biosynthetic process","2/304","40/18866",0.135650191530101,0.135650191530101,0.470787488744852,"FYN/WDR35",2
GO:0010256,"GO:0010256","endomembrane system organization","11/304","468/18866",0.136867046675876,0.136867046675876,0.470787488744852,"ALS2CL/ATL3/CREB1/MIA3/MYOF/PRKN/RAB33B/SNX19/TBPL1/TOR1AIP1/YWHAZ",11
GO:0098656,"GO:0098656","anion transmembrane transport","8/304","315/18866",0.137958610661307,0.137958610661307,0.470787488744852,"IRS2/RGS4/SLC16A3/SLC22A4/SLC25A13/SLC35B4/SLC36A4/SLC43A1",8
GO:0055002,"GO:0055002","striated muscle cell development","5/304","169/18866",0.138118755035487,0.138118755035487,0.470787488744852,"ATG5/CXADR/EDN1/MYOF/RGS4",5
GO:0060249,"GO:0060249","anatomical structure homeostasis","11/304","469/18866",0.138272004677491,0.138272004677491,0.470787488744852,"CCNE2/CLDN3/CXADR/LAMC1/LIPA/NXNL2/PDK4/POLE4/PRKN/SPP1/WHRN",11
GO:1901224,"GO:1901224","positive regulation of NIK/NF-kappaB signaling","3/304","80/18866",0.138694314997974,0.138694314997974,0.470787488744852,"EDAR/EDN1/RTKN2",3
GO:0022612,"GO:0022612","gland morphogenesis","4/304","124/18866",0.140448799850538,0.140448799850538,0.470787488744852,"BMP7/EDAR/GLI1/MED1",4
GO:0051101,"GO:0051101","regulation of DNA binding","4/304","124/18866",0.140448799850538,0.140448799850538,0.470787488744852,"HEY1/JUN/PRKN/TRIM6",4
GO:0034614,"GO:0034614","cellular response to reactive oxygen species","5/304","170/18866",0.140559441950156,0.140559441950156,0.470787488744852,"BMP7/BNIP3/FOXO3/GCH1/JUN",5
GO:0006040,"GO:0006040","amino sugar metabolic process","2/304","41/18866",0.141163469242462,0.141163469242462,0.470787488744852,"CHST6/ST3GAL1",2
GO:0021532,"GO:0021532","neural tube patterning","2/304","41/18866",0.141163469242462,0.141163469242462,0.470787488744852,"DZIP1L/GPR161",2
GO:0033574,"GO:0033574","response to testosterone","2/304","41/18866",0.141163469242462,0.141163469242462,0.470787488744852,"EDN1/SPP1",2
GO:0035337,"GO:0035337","fatty-acyl-CoA metabolic process","2/304","41/18866",0.141163469242462,0.141163469242462,0.470787488744852,"ELOVL7/HACD1",2
GO:0038083,"GO:0038083","peptidyl-tyrosine autophosphorylation","2/304","41/18866",0.141163469242462,0.141163469242462,0.470787488744852,"FYN/YES1",2
GO:0048286,"GO:0048286","lung alveolus development","2/304","41/18866",0.141163469242462,0.141163469242462,0.470787488744852,"CREB1/PHF14",2
GO:0051354,"GO:0051354","negative regulation of oxidoreductase activity","2/304","41/18866",0.141163469242462,0.141163469242462,0.470787488744852,"PDK4/PRKN",2
GO:0072528,"GO:0072528","pyrimidine-containing compound biosynthetic process","2/304","41/18866",0.141163469242462,0.141163469242462,0.470787488744852,"NME9/TBPL1",2
GO:1905209,"GO:1905209","positive regulation of cardiocyte differentiation","2/304","41/18866",0.141163469242462,0.141163469242462,0.470787488744852,"BMP7/EDN1",2
GO:0015850,"GO:0015850","organic hydroxy compound transport","7/304","268/18866",0.143309349563088,0.143309349563088,0.470787488744852,"LDLR/PLTP/PRKN/SLC16A3/SPP1/STARD4/SYT12",7
GO:0033673,"GO:0033673","negative regulation of kinase activity","7/304","268/18866",0.143309349563088,0.143309349563088,0.470787488744852,"BMP7/FOXA2/IRS2/KAT2B/PPP2R5A/PRKN/RGS4",7
GO:0007098,"GO:0007098","centrosome cycle","4/304","125/18866",0.143377068326095,0.143377068326095,0.470787488744852,"CETN2/KAT2B/PLK4/SSX2IP",4
GO:0048593,"GO:0048593","camera-type eye morphogenesis","4/304","125/18866",0.143377068326095,0.143377068326095,0.470787488744852,"BMP7/FZD5/RORB/TENM3",4
GO:0009142,"GO:0009142","nucleoside triphosphate biosynthetic process","3/304","82/18866",0.14617537963155,0.14617537963155,0.470787488744852,"NME9/SLC25A13/TBPL1",3
GO:0022617,"GO:0022617","extracellular matrix disassembly","3/304","82/18866",0.14617537963155,0.14617537963155,0.470787488744852,"FGFR4/LAMC1/TLL1",3
GO:0120193,"GO:0120193","tight junction organization","3/304","82/18866",0.14617537963155,0.14617537963155,0.470787488744852,"CLDN3/FZD5/MYO1C",3
GO:0055007,"GO:0055007","cardiac muscle cell differentiation","4/304","126/18866",0.146329315949093,0.146329315949093,0.470787488744852,"ATG5/CXADR/EDN1/RGS4",4
GO:0000266,"GO:0000266","mitochondrial fission","2/304","42/18866",0.146723920989752,0.146723920989752,0.470787488744852,"BNIP3/PRKN",2
GO:0034383,"GO:0034383","low-density lipoprotein particle clearance","2/304","42/18866",0.146723920989752,0.146723920989752,0.470787488744852,"LDLR/LIPA",2
GO:0046621,"GO:0046621","negative regulation of organ growth","2/304","42/18866",0.146723920989752,0.146723920989752,0.470787488744852,"CXADR/RGS4",2
GO:1900371,"GO:1900371","regulation of purine nucleotide biosynthetic process","2/304","42/18866",0.146723920989752,0.146723920989752,0.470787488744852,"PDK4/PDP1",2
GO:1902622,"GO:1902622","regulation of neutrophil migration","2/304","42/18866",0.146723920989752,0.146723920989752,0.470787488744852,"EDN1/SLIT2",2
GO:0042445,"GO:0042445","hormone metabolic process","6/304","221/18866",0.147810251859576,0.147810251859576,0.470787488744852,"CYP3A5/FDX1/MED1/SPP1/STARD3NL/TIPARP",6
GO:0021543,"GO:0021543","pallium development","5/304","173/18866",0.147993703724353,0.147993703724353,0.470787488744852,"BNIP3/DIXDC1/PHLPP2/POU3F2/SLIT2",5
GO:0099173,"GO:0099173","postsynapse organization","5/304","173/18866",0.147993703724353,0.147993703724353,0.470787488744852,"DBN1/EPHA4/FYN/PICK1/SHANK2",5
GO:1901214,"GO:1901214","regulation of neuron death","8/304","321/18866",0.148565716682966,0.148565716682966,0.470787488744852,"ATP13A2/BACE1/CREB1/FOXO3/FYN/GCLC/JUN/PRKN",8
GO:0006839,"GO:0006839","mitochondrial transport","7/304","271/18866",0.149179196122317,0.149179196122317,0.470787488744852,"ABLIM3/BNIP3/FZD5/GCLC/PRKN/SLC25A13/YWHAZ",7
GO:0001570,"GO:0001570","vasculogenesis","3/304","83/18866",0.14996467757832,0.14996467757832,0.470787488744852,"HEY1/QKI/TIPARP",3
GO:0002718,"GO:0002718","regulation of cytokine production involved in immune response","3/304","83/18866",0.14996467757832,0.14996467757832,0.470787488744852,"FZD5/SMAD7/TRIM6",3
GO:0048644,"GO:0048644","muscle organ morphogenesis","3/304","83/18866",0.14996467757832,0.14996467757832,0.470787488744852,"MED1/PKP2/SMAD7",3
GO:0048708,"GO:0048708","astrocyte differentiation","3/304","83/18866",0.14996467757832,0.14996467757832,0.470787488744852,"EPHA4/LDLR/POU3F2",3
GO:0002934,"GO:0002934","desmosome organization","1/304","10/18866",0.149973605988489,0.149973605988489,0.470787488744852,"PKP2",1
GO:0006171,"GO:0006171","cAMP biosynthetic process","1/304","10/18866",0.149973605988489,0.149973605988489,0.470787488744852,"ADCY7",1
GO:0006228,"GO:0006228","UTP biosynthetic process","1/304","10/18866",0.149973605988489,0.149973605988489,0.470787488744852,"NME9",1
GO:0009133,"GO:0009133","nucleoside diphosphate biosynthetic process","1/304","10/18866",0.149973605988489,0.149973605988489,0.470787488744852,"ENTPD8",1
GO:0009396,"GO:0009396","folic acid-containing compound biosynthetic process","1/304","10/18866",0.149973605988489,0.149973605988489,0.470787488744852,"GCH1",1
GO:0015808,"GO:0015808","L-alanine transport","1/304","10/18866",0.149973605988489,0.149973605988489,0.470787488744852,"SLC36A4",1
GO:0019614,"GO:0019614","catechol-containing compound catabolic process","1/304","10/18866",0.149973605988489,0.149973605988489,0.470787488744852,"MOXD1",1
GO:0021936,"GO:0021936","regulation of cerebellar granule cell precursor proliferation","1/304","10/18866",0.149973605988489,0.149973605988489,0.470787488744852,"GLI1",1
GO:0031118,"GO:0031118","rRNA pseudouridine synthesis","1/304","10/18866",0.149973605988489,0.149973605988489,0.470787488744852,"RPUSD4",1
GO:0032000,"GO:0032000","positive regulation of fatty acid beta-oxidation","1/304","10/18866",0.149973605988489,0.149973605988489,0.470787488744852,"IRS2",1
GO:0032025,"GO:0032025","response to cobalt ion","1/304","10/18866",0.149973605988489,0.149973605988489,0.470787488744852,"BNIP3",1
GO:0032308,"GO:0032308","positive regulation of prostaglandin secretion","1/304","10/18866",0.149973605988489,0.149973605988489,0.470787488744852,"EDN1",1
GO:0033083,"GO:0033083","regulation of immature T cell proliferation","1/304","10/18866",0.149973605988489,0.149973605988489,0.470787488744852,"RIPK2",1
GO:0034154,"GO:0034154","toll-like receptor 7 signaling pathway","1/304","10/18866",0.149973605988489,0.149973605988489,0.470787488744852,"PIK3AP1",1
GO:0034975,"GO:0034975","protein folding in endoplasmic reticulum","1/304","10/18866",0.149973605988489,0.149973605988489,0.470787488744852,"ERO1A",1
GO:0035524,"GO:0035524","proline transmembrane transport","1/304","10/18866",0.149973605988489,0.149973605988489,0.470787488744852,"SLC36A4",1
GO:0035581,"GO:0035581","sequestering of extracellular ligand from receptor","1/304","10/18866",0.149973605988489,0.149973605988489,0.470787488744852,"FBN1",1
GO:0035646,"GO:0035646","endosome to melanosome transport","1/304","10/18866",0.149973605988489,0.149973605988489,0.470787488744852,"RAB32",1
GO:0035907,"GO:0035907","dorsal aorta development","1/304","10/18866",0.149973605988489,0.149973605988489,0.470787488744852,"HEY1",1
GO:0042424,"GO:0042424","catecholamine catabolic process","1/304","10/18866",0.149973605988489,0.149973605988489,0.470787488744852,"MOXD1",1
GO:0043485,"GO:0043485","endosome to pigment granule transport","1/304","10/18866",0.149973605988489,0.149973605988489,0.470787488744852,"RAB32",1
GO:0045625,"GO:0045625","regulation of T-helper 1 cell differentiation","1/304","10/18866",0.149973605988489,0.149973605988489,0.470787488744852,"RIPK2",1
GO:0045647,"GO:0045647","negative regulation of erythrocyte differentiation","1/304","10/18866",0.149973605988489,0.149973605988489,0.470787488744852,"MAFB",1
GO:0045793,"GO:0045793","positive regulation of cell size","1/304","10/18866",0.149973605988489,0.149973605988489,0.470787488744852,"EDN1",1
GO:0046548,"GO:0046548","retinal rod cell development","1/304","10/18866",0.149973605988489,0.149973605988489,0.470787488744852,"RORB",1
GO:0048570,"GO:0048570","notochord morphogenesis","1/304","10/18866",0.149973605988489,0.149973605988489,0.470787488744852,"GLI1",1
GO:0048739,"GO:0048739","cardiac muscle fiber development","1/304","10/18866",0.149973605988489,0.149973605988489,0.470787488744852,"CXADR",1
GO:0048757,"GO:0048757","pigment granule maturation","1/304","10/18866",0.149973605988489,0.149973605988489,0.470787488744852,"RAB32",1
GO:0051124,"GO:0051124","synaptic growth at neuromuscular junction","1/304","10/18866",0.149973605988489,0.149973605988489,0.470787488744852,"SHANK2",1
GO:0060513,"GO:0060513","prostatic bud formation","1/304","10/18866",0.149973605988489,0.149973605988489,0.470787488744852,"BMP7",1
GO:0070391,"GO:0070391","response to lipoteichoic acid","1/304","10/18866",0.149973605988489,0.149973605988489,0.470787488744852,"RIPK2",1
GO:0070544,"GO:0070544","histone H3-K36 demethylation","1/304","10/18866",0.149973605988489,0.149973605988489,0.470787488744852,"RIOX1",1
GO:0070862,"GO:0070862","negative regulation of protein exit from endoplasmic reticulum","1/304","10/18866",0.149973605988489,0.149973605988489,0.470787488744852,"INSIG1",1
GO:0071223,"GO:0071223","cellular response to lipoteichoic acid","1/304","10/18866",0.149973605988489,0.149973605988489,0.470787488744852,"RIPK2",1
GO:0071394,"GO:0071394","cellular response to testosterone stimulus","1/304","10/18866",0.149973605988489,0.149973605988489,0.470787488744852,"SPP1",1
GO:0071670,"GO:0071670","smooth muscle cell chemotaxis","1/304","10/18866",0.149973605988489,0.149973605988489,0.470787488744852,"SLIT2",1
GO:0072124,"GO:0072124","regulation of glomerular mesangial cell proliferation","1/304","10/18866",0.149973605988489,0.149973605988489,0.470787488744852,"BMP7",1
GO:0072203,"GO:0072203","cell proliferation involved in metanephros development","1/304","10/18866",0.149973605988489,0.149973605988489,0.470787488744852,"BMP7",1
GO:0090009,"GO:0090009","primitive streak formation","1/304","10/18866",0.149973605988489,0.149973605988489,0.470787488744852,"FOXA2",1
GO:0090649,"GO:0090649","response to oxygen-glucose deprivation","1/304","10/18866",0.149973605988489,0.149973605988489,0.470787488744852,"BNIP3",1
GO:0098779,"GO:0098779","positive regulation of mitophagy in response to mitochondrial depolarization","1/304","10/18866",0.149973605988489,0.149973605988489,0.470787488744852,"PRKN",1
GO:2000271,"GO:2000271","positive regulation of fibroblast apoptotic process","1/304","10/18866",0.149973605988489,0.149973605988489,0.470787488744852,"STK17A",1
GO:2000320,"GO:2000320","negative regulation of T-helper 17 cell differentiation","1/304","10/18866",0.149973605988489,0.149973605988489,0.470787488744852,"SMAD7",1
GO:2001054,"GO:2001054","negative regulation of mesenchymal cell apoptotic process","1/304","10/18866",0.149973605988489,0.149973605988489,0.470787488744852,"BMP7",1
GO:0017157,"GO:0017157","regulation of exocytosis","6/304","222/18866",0.150009312179425,0.150009312179425,0.470787488744852,"ATP13A2/BACE1/PRKN/RAB33B/SYT12/VAMP1",6
GO:0015718,"GO:0015718","monocarboxylic acid transport","5/304","174/18866",0.150508495778177,0.150508495778177,0.470787488744852,"EDN1/FABP5/IRS2/PROCA1/SLC16A3",5
GO:0030833,"GO:0030833","regulation of actin filament polymerization","5/304","174/18866",0.150508495778177,0.150508495778177,0.470787488744852,"ARHGAP28/DBN1/MYO1C/PICK1/SLIT2",5
GO:0051099,"GO:0051099","positive regulation of binding","5/304","174/18866",0.150508495778177,0.150508495778177,0.470787488744852,"EPHA4/PLCL1/PRKN/RIPK2/TRIM6",5
GO:0006470,"GO:0006470","protein dephosphorylation","8/304","323/18866",0.152187883935257,0.152187883935257,0.470787488744852,"ENSA/FBXW11/PDP1/PHLPP2/PPA2/PPP2R5A/PPP2R5E/TNS2",8
GO:0034763,"GO:0034763","negative regulation of transmembrane transport","4/304","128/18866",0.152304197639048,0.152304197639048,0.470787488744852,"FABP5/IRS2/RGS4/SLC43A1",4
GO:0002369,"GO:0002369","T cell cytokine production","2/304","43/18866",0.15232860943245,0.15232860943245,0.470787488744852,"FZD5/SMAD7",2
GO:0010470,"GO:0010470","regulation of gastrulation","2/304","43/18866",0.15232860943245,0.15232860943245,0.470787488744852,"FOXA2/HNF4A",2
GO:0030808,"GO:0030808","regulation of nucleotide biosynthetic process","2/304","43/18866",0.15232860943245,0.15232860943245,0.470787488744852,"PDK4/PDP1",2
GO:0045124,"GO:0045124","regulation of bone resorption","2/304","43/18866",0.15232860943245,0.15232860943245,0.470787488744852,"PDK4/SPP1",2
GO:0061462,"GO:0061462","protein localization to lysosome","2/304","43/18866",0.15232860943245,0.15232860943245,0.470787488744852,"ATP13A2/M6PR",2
GO:0071364,"GO:0071364","cellular response to epidermal growth factor stimulus","2/304","43/18866",0.15232860943245,0.15232860943245,0.470787488744852,"MCM7/MED1",2
GO:0022412,"GO:0022412","cellular process involved in reproduction in multicellular organism","9/304","375/18866",0.153438864621192,0.153438864621192,0.470787488744852,"CEP57/CXADR/FBXW11/FOXO3/PICK1/QKI/SLIT2/STRBP/TBPL1",9
GO:0008652,"GO:0008652","cellular amino acid biosynthetic process","3/304","84/18866",0.153785315090788,0.153785315090788,0.470787488744852,"ASL/ASS1/DPYD",3
GO:0015844,"GO:0015844","monoamine transport","3/304","84/18866",0.153785315090788,0.153785315090788,0.470787488744852,"PICK1/PRKN/SYT12",3
GO:0045913,"GO:0045913","positive regulation of carbohydrate metabolic process","3/304","84/18866",0.153785315090788,0.153785315090788,0.470787488744852,"IRS2/KAT2B/SORBS1",3
GO:0051235,"GO:0051235","maintenance of location","8/304","324/18866",0.154014898970246,0.154014898970246,0.470787488744852,"ATG5/DBN1/ERO1A/FBN1/GM2A/INSIG1/STARD4/TRPC1",8
GO:0043624,"GO:0043624","cellular protein complex disassembly","6/304","224/18866",0.154451430830877,0.154451430830877,0.470787488744852,"MRPL19/MRPL50/MRPS7/PLEKHH2/SEMA5A/TPX2",6
GO:0002576,"GO:0002576","platelet degranulation","4/304","129/18866",0.155326048781545,0.155326048781545,0.470787488744852,"CD109/F5/F8/FN1",4
GO:0070371,"GO:0070371","ERK1 and ERK2 cascade","8/304","325/18866",0.155852448115287,0.155852448115287,0.470787488744852,"BRAF/CAVIN3/FGFR4/FN1/JUN/MED1/RIPK2/YWHAZ",8
GO:0043297,"GO:0043297","apical junction assembly","3/304","85/18866",0.157636416013121,0.157636416013121,0.470787488744852,"CLDN3/FZD5/MYO1C",3
GO:0072384,"GO:0072384","organelle transport along microtubule","3/304","85/18866",0.157636416013121,0.157636416013121,0.470787488744852,"COPG2/FBXW11/KIF3C",3
GO:0072527,"GO:0072527","pyrimidine-containing compound metabolic process","3/304","85/18866",0.157636416013121,0.157636416013121,0.470787488744852,"DPYD/NME9/TBPL1",3
GO:0110110,"GO:0110110","positive regulation of animal organ morphogenesis","3/304","85/18866",0.157636416013121,0.157636416013121,0.470787488744852,"BMP7/EDN1/MED1",3
GO:0010824,"GO:0010824","regulation of centrosome duplication","2/304","44/18866",0.157974679070949,0.157974679070949,0.470787488744852,"KAT2B/PLK4",2
GO:0031670,"GO:0031670","cellular response to nutrient","2/304","44/18866",0.157974679070949,0.157974679070949,0.470787488744852,"FOXA2/MED1",2
GO:0032881,"GO:0032881","regulation of polysaccharide metabolic process","2/304","44/18866",0.157974679070949,0.157974679070949,0.470787488744852,"IRS2/SORBS1",2
GO:0045910,"GO:0045910","negative regulation of DNA recombination","2/304","44/18866",0.157974679070949,0.157974679070949,0.470787488744852,"FANCB/KLHL15",2
GO:0050654,"GO:0050654","chondroitin sulfate proteoglycan metabolic process","2/304","44/18866",0.157974679070949,0.157974679070949,0.470787488744852,"CHSY3/VCAN",2
GO:0060999,"GO:0060999","positive regulation of dendritic spine development","2/304","44/18866",0.157974679070949,0.157974679070949,0.470787488744852,"DBN1/SHANK2",2
GO:0120009,"GO:0120009","intermembrane lipid transfer","2/304","44/18866",0.157974679070949,0.157974679070949,0.470787488744852,"PLTP/STARD4",2
GO:0051051,"GO:0051051","negative regulation of transport","11/304","483/18866",0.158742816856396,0.158742816856396,0.470787488744852,"ATG5/EDN1/FABP5/GCLC/INSIG1/IRS2/LYPLA1/PRKN/RAB33B/RGS4/SLC43A1",11
GO:0051260,"GO:0051260","protein homooligomerization","5/304","178/18866",0.160745469502965,0.160745469502965,0.470787488744852,"ATL3/CEP57/CRYZ/KCNS1/KCTD7",5
GO:0051897,"GO:0051897","positive regulation of protein kinase B signaling","5/304","178/18866",0.160745469502965,0.160745469502965,0.470787488744852,"FGFR4/FYN/IRS2/PIK3AP1/SEMA5A",5
GO:0034504,"GO:0034504","protein localization to nucleus","7/304","277/18866",0.161251783583479,0.161251783583479,0.470787488744852,"ATP13A2/BMP7/FYN/MED1/PTTG1IP/TBRG1/TOR1AIP1",7
GO:0046887,"GO:0046887","positive regulation of hormone secretion","4/304","131/18866",0.161436594138296,0.161436594138296,0.470787488744852,"CREB1/EDN1/IRS2/SPP1",4
GO:0006112,"GO:0006112","energy reserve metabolic process","3/304","86/18866",0.161517106334472,0.161517106334472,0.470787488744852,"GYG1/IRS2/SORBS1",3
GO:0034109,"GO:0034109","homotypic cell-cell adhesion","3/304","86/18866",0.161517106334472,0.161517106334472,0.470787488744852,"CXADR/FN1/PKP2",3
GO:0097756,"GO:0097756","negative regulation of blood vessel diameter","3/304","86/18866",0.161517106334472,0.161517106334472,0.470787488744852,"EDN1/KCNMB4/WDR35",3
GO:0032102,"GO:0032102","negative regulation of response to external stimulus","10/304","433/18866",0.163139752744494,0.163139752744494,0.470787488744852,"ADCY7/BACE1/CD109/CLDN3/EDN1/EPHA4/LDLR/SEMA5A/SLIT2/SPP1",10
GO:0043491,"GO:0043491","protein kinase B signaling","7/304","278/18866",0.163305959912576,0.163305959912576,0.470787488744852,"CAVIN3/FGFR4/FYN/IRS2/PHLPP2/PIK3AP1/SEMA5A",7
GO:0003197,"GO:0003197","endocardial cushion development","2/304","45/18866",0.163659354385363,0.163659354385363,0.470787488744852,"BMP7/HEY1",2
GO:0006418,"GO:0006418","tRNA aminoacylation for protein translation","2/304","45/18866",0.163659354385363,0.163659354385363,0.470787488744852,"DARS2/PPA2",2
GO:0010677,"GO:0010677","negative regulation of cellular carbohydrate metabolic process","2/304","45/18866",0.163659354385363,0.163659354385363,0.470787488744852,"FOXA2/PRKN",2
GO:0014002,"GO:0014002","astrocyte development","2/304","45/18866",0.163659354385363,0.163659354385363,0.470787488744852,"LDLR/POU3F2",2
GO:0031018,"GO:0031018","endocrine pancreas development","2/304","45/18866",0.163659354385363,0.163659354385363,0.470787488744852,"FOXA2/HNF4A",2
GO:0032365,"GO:0032365","intracellular lipid transport","2/304","45/18866",0.163659354385363,0.163659354385363,0.470787488744852,"LDLR/STARD4",2
GO:0035094,"GO:0035094","response to nicotine","2/304","45/18866",0.163659354385363,0.163659354385363,0.470787488744852,"CREB1/EDN1",2
GO:0043114,"GO:0043114","regulation of vascular permeability","2/304","45/18866",0.163659354385363,0.163659354385363,0.470787488744852,"SLIT2/YES1",2
GO:0045429,"GO:0045429","positive regulation of nitric oxide biosynthetic process","2/304","45/18866",0.163659354385363,0.163659354385363,0.470787488744852,"ASS1/EDN1",2
GO:0045616,"GO:0045616","regulation of keratinocyte differentiation","2/304","45/18866",0.163659354385363,0.163659354385363,0.470787488744852,"CD109/MED1",2
GO:0055026,"GO:0055026","negative regulation of cardiac muscle tissue development","2/304","45/18866",0.163659354385363,0.163659354385363,0.470787488744852,"CXADR/RGS4",2
GO:0070316,"GO:0070316","regulation of G0 to G1 transition","2/304","45/18866",0.163659354385363,0.163659354385363,0.470787488744852,"CBX5/MED1",2
GO:0098815,"GO:0098815","modulation of excitatory postsynaptic potential","2/304","45/18866",0.163659354385363,0.163659354385363,0.470787488744852,"RGS4/SHANK2",2
GO:1901028,"GO:1901028","regulation of mitochondrial outer membrane permeabilization involved in apoptotic signaling pathway","2/304","45/18866",0.163659354385363,0.163659354385363,0.470787488744852,"GCLC/YWHAZ",2
GO:2001222,"GO:2001222","regulation of neuron migration","2/304","45/18866",0.163659354385363,0.163659354385363,0.470787488744852,"ULK4/ZSWIM6",2
GO:0005984,"GO:0005984","disaccharide metabolic process","1/304","11/18866",0.163677892357788,0.163677892357788,0.470787488744852,"BRAF",1
GO:0006054,"GO:0006054","N-acetylneuraminate metabolic process","1/304","11/18866",0.163677892357788,0.163677892357788,0.470787488744852,"ST3GAL1",1
GO:0006183,"GO:0006183","GTP biosynthetic process","1/304","11/18866",0.163677892357788,0.163677892357788,0.470787488744852,"NME9",1
GO:0006702,"GO:0006702","androgen biosynthetic process","1/304","11/18866",0.163677892357788,0.163677892357788,0.470787488744852,"MED1",1
GO:0007256,"GO:0007256","activation of JNKK activity","1/304","11/18866",0.163677892357788,0.163677892357788,0.470787488744852,"RIPK2",1
GO:0009950,"GO:0009950","dorsal/ventral axis specification","1/304","11/18866",0.163677892357788,0.163677892357788,0.470787488744852,"CXXC4",1
GO:0014820,"GO:0014820","tonic smooth muscle contraction","1/304","11/18866",0.163677892357788,0.163677892357788,0.470787488744852,"EDN1",1
GO:0014889,"GO:0014889","muscle atrophy","1/304","11/18866",0.163677892357788,0.163677892357788,0.470787488744852,"FOXO3",1
GO:0016081,"GO:0016081","synaptic vesicle docking","1/304","11/18866",0.163677892357788,0.163677892357788,0.470787488744852,"UNC13A",1
GO:0018401,"GO:0018401","peptidyl-proline hydroxylation to 4-hydroxy-L-proline","1/304","11/18866",0.163677892357788,0.163677892357788,0.470787488744852,"ERO1A",1
GO:0019852,"GO:0019852","L-ascorbic acid metabolic process","1/304","11/18866",0.163677892357788,0.163677892357788,0.470787488744852,"GCLC",1
GO:0031630,"GO:0031630","regulation of synaptic vesicle fusion to presynaptic active zone membrane","1/304","11/18866",0.163677892357788,0.163677892357788,0.470787488744852,"VAMP1",1
GO:0032060,"GO:0032060","bleb assembly","1/304","11/18866",0.163677892357788,0.163677892357788,0.470787488744852,"EMP1",1
GO:0032306,"GO:0032306","regulation of prostaglandin secretion","1/304","11/18866",0.163677892357788,0.163677892357788,0.470787488744852,"EDN1",1
GO:0033079,"GO:0033079","immature T cell proliferation","1/304","11/18866",0.163677892357788,0.163677892357788,0.470787488744852,"RIPK2",1
GO:0033148,"GO:0033148","positive regulation of intracellular estrogen receptor signaling pathway","1/304","11/18866",0.163677892357788,0.163677892357788,0.470787488744852,"MED1",1
GO:0035246,"GO:0035246","peptidyl-arginine N-methylation","1/304","11/18866",0.163677892357788,0.163677892357788,0.470787488744852,"PRMT9",1
GO:0035457,"GO:0035457","cellular response to interferon-alpha","1/304","11/18866",0.163677892357788,0.163677892357788,0.470787488744852,"PDE12",1
GO:0035721,"GO:0035721","intraciliary retrograde transport","1/304","11/18866",0.163677892357788,0.163677892357788,0.470787488744852,"WDR35",1
GO:0042447,"GO:0042447","hormone catabolic process","1/304","11/18866",0.163677892357788,0.163677892357788,0.470787488744852,"SPP1",1
GO:0042482,"GO:0042482","positive regulation of odontogenesis","1/304","11/18866",0.163677892357788,0.163677892357788,0.470787488744852,"EDN1",1
GO:0042670,"GO:0042670","retinal cone cell differentiation","1/304","11/18866",0.163677892357788,0.163677892357788,0.470787488744852,"RORB",1
GO:0042789,"GO:0042789","mRNA transcription by RNA polymerase II","1/304","11/18866",0.163677892357788,0.163677892357788,0.470787488744852,"MED1",1
GO:0045060,"GO:0045060","negative thymic T cell selection","1/304","11/18866",0.163677892357788,0.163677892357788,0.470787488744852,"ATG5",1
GO:0045657,"GO:0045657","positive regulation of monocyte differentiation","1/304","11/18866",0.163677892357788,0.163677892357788,0.470787488744852,"JUN",1
GO:0045899,"GO:0045899","positive regulation of RNA polymerase II transcription preinitiation complex assembly","1/304","11/18866",0.163677892357788,0.163677892357788,0.470787488744852,"CREB1",1
GO:0046051,"GO:0046051","UTP metabolic process","1/304","11/18866",0.163677892357788,0.163677892357788,0.470787488744852,"NME9",1
GO:0046501,"GO:0046501","protoporphyrinogen IX metabolic process","1/304","11/18866",0.163677892357788,0.163677892357788,0.470787488744852,"PPOX",1
GO:0046549,"GO:0046549","retinal cone cell development","1/304","11/18866",0.163677892357788,0.163677892357788,0.470787488744852,"RORB",1
GO:0046607,"GO:0046607","positive regulation of centrosome cycle","1/304","11/18866",0.163677892357788,0.163677892357788,0.470787488744852,"PLK4",1
GO:0048102,"GO:0048102","autophagic cell death","1/304","11/18866",0.163677892357788,0.163677892357788,0.470787488744852,"BNIP3",1
GO:0048103,"GO:0048103","somatic stem cell division","1/304","11/18866",0.163677892357788,0.163677892357788,0.470787488744852,"LBH",1
GO:0048642,"GO:0048642","negative regulation of skeletal muscle tissue development","1/304","11/18866",0.163677892357788,0.163677892357788,0.470787488744852,"YBX3",1
GO:0051561,"GO:0051561","positive regulation of mitochondrial calcium ion concentration","1/304","11/18866",0.163677892357788,0.163677892357788,0.470787488744852,"BNIP3",1
GO:0060159,"GO:0060159","regulation of dopamine receptor signaling pathway","1/304","11/18866",0.163677892357788,0.163677892357788,0.470787488744852,"RGS4",1
GO:0060272,"GO:0060272","embryonic skeletal joint morphogenesis","1/304","11/18866",0.163677892357788,0.163677892357788,0.470787488744852,"BMP7",1
GO:0060837,"GO:0060837","blood vessel endothelial cell differentiation","1/304","11/18866",0.163677892357788,0.163677892357788,0.470787488744852,"HEY1",1
GO:0061307,"GO:0061307","cardiac neural crest cell differentiation involved in heart development","1/304","11/18866",0.163677892357788,0.163677892357788,0.470787488744852,"BMP7",1
GO:0061308,"GO:0061308","cardiac neural crest cell development involved in heart development","1/304","11/18866",0.163677892357788,0.163677892357788,0.470787488744852,"BMP7",1
GO:0061314,"GO:0061314","Notch signaling involved in heart development","1/304","11/18866",0.163677892357788,0.163677892357788,0.470787488744852,"HEY1",1
GO:0070254,"GO:0070254","mucus secretion","1/304","11/18866",0.163677892357788,0.163677892357788,0.470787488744852,"ATG5",1
GO:0070673,"GO:0070673","response to interleukin-18","1/304","11/18866",0.163677892357788,0.163677892357788,0.470787488744852,"RIPK2",1
GO:0070778,"GO:0070778","L-aspartate transmembrane transport","1/304","11/18866",0.163677892357788,0.163677892357788,0.470787488744852,"SLC25A13",1
GO:0071281,"GO:0071281","cellular response to iron ion","1/304","11/18866",0.163677892357788,0.163677892357788,0.470787488744852,"SLC40A1",1
GO:0071372,"GO:0071372","cellular response to follicle-stimulating hormone stimulus","1/304","11/18866",0.163677892357788,0.163677892357788,0.470787488744852,"GCLC",1
GO:0072110,"GO:0072110","glomerular mesangial cell proliferation","1/304","11/18866",0.163677892357788,0.163677892357788,0.470787488744852,"BMP7",1
GO:0086016,"GO:0086016","AV node cell action potential","1/304","11/18866",0.163677892357788,0.163677892357788,0.470787488744852,"CXADR",1
GO:0086027,"GO:0086027","AV node cell to bundle of His cell signaling","1/304","11/18866",0.163677892357788,0.163677892357788,0.470787488744852,"CXADR",1
GO:0090481,"GO:0090481","pyrimidine nucleotide-sugar transmembrane transport","1/304","11/18866",0.163677892357788,0.163677892357788,0.470787488744852,"SLC35B4",1
GO:0098883,"GO:0098883","synapse pruning","1/304","11/18866",0.163677892357788,0.163677892357788,0.470787488744852,"EPHA4",1
GO:0098917,"GO:0098917","retrograde trans-synaptic signaling","1/304","11/18866",0.163677892357788,0.163677892357788,0.470787488744852,"FABP5",1
GO:0106049,"GO:0106049","regulation of cellular response to osmotic stress","1/304","11/18866",0.163677892357788,0.163677892357788,0.470787488744852,"YBX3",1
GO:0140052,"GO:0140052","cellular response to oxidised low-density lipoprotein particle stimulus","1/304","11/18866",0.163677892357788,0.163677892357788,0.470787488744852,"MIA3",1
GO:0150104,"GO:0150104","transport across blood-brain barrier","1/304","11/18866",0.163677892357788,0.163677892357788,0.470787488744852,"FABP5",1
GO:1901033,"GO:1901033","positive regulation of response to reactive oxygen species","1/304","11/18866",0.163677892357788,0.163677892357788,0.470787488744852,"FOXO3",1
GO:1901526,"GO:1901526","positive regulation of mitophagy","1/304","11/18866",0.163677892357788,0.163677892357788,0.470787488744852,"PRKN",1
GO:1902474,"GO:1902474","positive regulation of protein localization to synapse","1/304","11/18866",0.163677892357788,0.163677892357788,0.470787488744852,"DBN1",1
GO:1903011,"GO:1903011","negative regulation of bone development","1/304","11/18866",0.163677892357788,0.163677892357788,0.470787488744852,"FBN1",1
GO:1903265,"GO:1903265","positive regulation of tumor necrosis factor-mediated signaling pathway","1/304","11/18866",0.163677892357788,0.163677892357788,0.470787488744852,"PRKN",1
GO:1904321,"GO:1904321","response to forskolin","1/304","11/18866",0.163677892357788,0.163677892357788,0.470787488744852,"FDX1",1
GO:1904322,"GO:1904322","cellular response to forskolin","1/304","11/18866",0.163677892357788,0.163677892357788,0.470787488744852,"FDX1",1
GO:1905168,"GO:1905168","positive regulation of double-strand break repair via homologous recombination","1/304","11/18866",0.163677892357788,0.163677892357788,0.470787488744852,"FANCB",1
GO:1905245,"GO:1905245","regulation of aspartic-type peptidase activity","1/304","11/18866",0.163677892357788,0.163677892357788,0.470787488744852,"EPHA4",1
GO:2000035,"GO:2000035","regulation of stem cell division","1/304","11/18866",0.163677892357788,0.163677892357788,0.470787488744852,"LBH",1
GO:2000049,"GO:2000049","positive regulation of cell-cell adhesion mediated by cadherin","1/304","11/18866",0.163677892357788,0.163677892357788,0.470787488744852,"FOXA2",1
GO:2000317,"GO:2000317","negative regulation of T-helper 17 type immune response","1/304","11/18866",0.163677892357788,0.163677892357788,0.470787488744852,"SMAD7",1
GO:2000574,"GO:2000574","regulation of microtubule motor activity","1/304","11/18866",0.163677892357788,0.163677892357788,0.470787488744852,"FBXW11",1
GO:2001138,"GO:2001138","regulation of phospholipid transport","1/304","11/18866",0.163677892357788,0.163677892357788,0.470787488744852,"DBI",1
GO:2001140,"GO:2001140","positive regulation of phospholipid transport","1/304","11/18866",0.163677892357788,0.163677892357788,0.470787488744852,"DBI",1
GO:0034329,"GO:0034329","cell junction assembly","10/304","434/18866",0.164774144517706,0.164774144517706,0.473541031284576,"CD151/CLDN3/FN1/FZD5/LAMC1/MYO1C/PKP2/SHANK2/SMAD7/SORBS1",10
GO:0006368,"GO:0006368","transcription elongation from RNA polymerase II promoter","3/304","87/18866",0.165426514630119,0.165426514630119,0.474216328956067,"CCNH/ELL2/TCEA1",3
GO:0048013,"GO:0048013","ephrin receptor signaling pathway","3/304","87/18866",0.165426514630119,0.165426514630119,0.474216328956067,"EPHA4/FYN/YES1",3
GO:1903363,"GO:1903363","negative regulation of cellular protein catabolic process","3/304","87/18866",0.165426514630119,0.165426514630119,0.474216328956067,"ATP13A2/CCAR2/EPHA4",3
GO:0006836,"GO:0006836","neurotransmitter transport","6/304","229/18866",0.165807013360495,0.165807013360495,0.474907659673846,"BACE1/KCNMB4/PRKN/SYT12/UNC13A/VAMP1",6
GO:0007548,"GO:0007548","sex differentiation","7/304","280/18866",0.167449514811042,0.167449514811042,0.4762613881731,"CENPI/FOXO3/GREB1L/HNF4A/SLIT2/TIPARP/YBX3",7
GO:0042177,"GO:0042177","negative regulation of protein catabolic process","4/304","133/18866",0.167633599029357,0.167633599029357,0.4762613881731,"ATP13A2/CCAR2/EPHA4/FYN",4
GO:0051495,"GO:0051495","positive regulation of cytoskeleton organization","6/304","230/18866",0.168119912801286,0.168119912801286,0.4762613881731,"EDN1/MYO1C/PFDN2/PICK1/PLK4/SEMA5A",6
GO:0002028,"GO:0002028","regulation of sodium ion transport","3/304","88/18866",0.169363772483457,0.169363772483457,0.4762613881731,"FXYD2/NETO2/PKP2",3
GO:0009798,"GO:0009798","axis specification","3/304","88/18866",0.169363772483457,0.169363772483457,0.4762613881731,"CXXC4/FOXA2/FZD5",3
GO:0014068,"GO:0014068","positive regulation of phosphatidylinositol 3-kinase signaling","3/304","88/18866",0.169363772483457,0.169363772483457,0.4762613881731,"FYN/IRS2/PIK3AP1",3
GO:0070125,"GO:0070125","mitochondrial translational elongation","3/304","88/18866",0.169363772483457,0.169363772483457,0.4762613881731,"MRPL19/MRPL50/MRPS7",3
GO:1901879,"GO:1901879","regulation of protein depolymerization","3/304","88/18866",0.169363772483457,0.169363772483457,0.4762613881731,"PLEKHH2/SEMA5A/TPX2",3
GO:0001754,"GO:0001754","eye photoreceptor cell differentiation","2/304","46/18866",0.169379938013713,0.169379938013713,0.4762613881731,"AGTPBP1/RORB",2
GO:0006220,"GO:0006220","pyrimidine nucleotide metabolic process","2/304","46/18866",0.169379938013713,0.169379938013713,0.4762613881731,"NME9/TBPL1",2
GO:0032309,"GO:0032309","icosanoid secretion","2/304","46/18866",0.169379938013713,0.169379938013713,0.4762613881731,"EDN1/PROCA1",2
GO:0045023,"GO:0045023","G0 to G1 transition","2/304","46/18866",0.169379938013713,0.169379938013713,0.4762613881731,"CBX5/MED1",2
GO:0048066,"GO:0048066","developmental pigmentation","2/304","46/18866",0.169379938013713,0.169379938013713,0.4762613881731,"RAB32/USP13",2
GO:1904407,"GO:1904407","positive regulation of nitric oxide metabolic process","2/304","46/18866",0.169379938013713,0.169379938013713,0.4762613881731,"ASS1/EDN1",2
GO:0045995,"GO:0045995","regulation of embryonic development","4/304","134/18866",0.170763516753872,0.170763516753872,0.4762613881731,"BMP7/FOXA2/GPR161/HNF4A",4
GO:0090316,"GO:0090316","positive regulation of intracellular protein transport","5/304","182/18866",0.171256301086624,0.171256301086624,0.4762613881731,"ABLIM3/FYN/FZD5/MYO1C/YWHAZ",5
GO:0071824,"GO:0071824","protein-DNA complex subunit organization","7/304","282/18866",0.171639342048655,0.171639342048655,0.4762613881731,"ACTR6/CCNH/CENPI/CETN2/CREB1/MCM7/SMARCD1",7
GO:0070126,"GO:0070126","mitochondrial translational termination","3/304","89/18866",0.173328014889427,0.173328014889427,0.4762613881731,"MRPL19/MRPL50/MRPS7",3
GO:0015748,"GO:0015748","organophosphate ester transport","4/304","135/18866",0.173913837236096,0.173913837236096,0.4762613881731,"DBI/LDLR/PLTP/SLC25A13",4
GO:0055001,"GO:0055001","muscle cell development","5/304","183/18866",0.17392509833772,0.17392509833772,0.4762613881731,"ATG5/CXADR/EDN1/MYOF/RGS4",5
GO:0007157,"GO:0007157","heterophilic cell-cell adhesion via plasma membrane cell adhesion molecules","2/304","47/18866",0.175133808967745,0.175133808967745,0.4762613881731,"CXADR/TENM3",2
GO:0010569,"GO:0010569","regulation of double-strand break repair via homologous recombination","2/304","47/18866",0.175133808967745,0.175133808967745,0.4762613881731,"FANCB/KLHL15",2
GO:0014075,"GO:0014075","response to amine","2/304","47/18866",0.175133808967745,0.175133808967745,0.4762613881731,"ASS1/RGS4",2
GO:0022602,"GO:0022602","ovulation cycle process","2/304","47/18866",0.175133808967745,0.175133808967745,0.4762613881731,"FOXO3/SLIT2",2
GO:0050919,"GO:0050919","negative chemotaxis","2/304","47/18866",0.175133808967745,0.175133808967745,0.4762613881731,"SEMA5A/SLIT2",2
GO:0070849,"GO:0070849","response to epidermal growth factor","2/304","47/18866",0.175133808967745,0.175133808967745,0.4762613881731,"MCM7/MED1",2
GO:0038061,"GO:0038061","NIK/NF-kappaB signaling","5/304","184/18866",0.176609868038595,0.176609868038595,0.4762613881731,"BMP7/EDAR/EDN1/FBXW11/RTKN2",5
GO:0000727,"GO:0000727","double-strand break repair via break-induced replication","1/304","12/18866",0.177161950736108,0.177161950736108,0.4762613881731,"MCM7",1
GO:0001778,"GO:0001778","plasma membrane repair","1/304","12/18866",0.177161950736108,0.177161950736108,0.4762613881731,"MYOF",1
GO:0001821,"GO:0001821","histamine secretion","1/304","12/18866",0.177161950736108,0.177161950736108,0.4762613881731,"EDN1",1
GO:0006534,"GO:0006534","cysteine metabolic process","1/304","12/18866",0.177161950736108,0.177161950736108,0.4762613881731,"GCLC",1
GO:0006983,"GO:0006983","ER overload response","1/304","12/18866",0.177161950736108,0.177161950736108,0.4762613881731,"ATG10",1
GO:0010232,"GO:0010232","vascular transport","1/304","12/18866",0.177161950736108,0.177161950736108,0.4762613881731,"FABP5",1
GO:0015780,"GO:0015780","nucleotide-sugar transmembrane transport","1/304","12/18866",0.177161950736108,0.177161950736108,0.4762613881731,"SLC35B4",1
GO:0015803,"GO:0015803","branched-chain amino acid transport","1/304","12/18866",0.177161950736108,0.177161950736108,0.4762613881731,"SLC43A1",1
GO:0015824,"GO:0015824","proline transport","1/304","12/18866",0.177161950736108,0.177161950736108,0.4762613881731,"SLC36A4",1
GO:0016188,"GO:0016188","synaptic vesicle maturation","1/304","12/18866",0.177161950736108,0.177161950736108,0.4762613881731,"UNC13A",1
GO:0021702,"GO:0021702","cerebellar Purkinje cell differentiation","1/304","12/18866",0.177161950736108,0.177161950736108,0.4762613881731,"AGTPBP1",1
GO:0021889,"GO:0021889","olfactory bulb interneuron differentiation","1/304","12/18866",0.177161950736108,0.177161950736108,0.4762613881731,"SLIT2",1
GO:0030208,"GO:0030208","dermatan sulfate biosynthetic process","1/304","12/18866",0.177161950736108,0.177161950736108,0.4762613881731,"VCAN",1
GO:0031392,"GO:0031392","regulation of prostaglandin biosynthetic process","1/304","12/18866",0.177161950736108,0.177161950736108,0.4762613881731,"FABP5",1
GO:0032494,"GO:0032494","response to peptidoglycan","1/304","12/18866",0.177161950736108,0.177161950736108,0.4762613881731,"RIPK2",1
GO:0034333,"GO:0034333","adherens junction assembly","1/304","12/18866",0.177161950736108,0.177161950736108,0.4762613881731,"SMAD7",1
GO:0042178,"GO:0042178","xenobiotic catabolic process","1/304","12/18866",0.177161950736108,0.177161950736108,0.4762613881731,"CRYZ",1
GO:0042182,"GO:0042182","ketone catabolic process","1/304","12/18866",0.177161950736108,0.177161950736108,0.4762613881731,"CBR3",1
GO:0042416,"GO:0042416","dopamine biosynthetic process","1/304","12/18866",0.177161950736108,0.177161950736108,0.4762613881731,"GCH1",1
GO:0043383,"GO:0043383","negative T cell selection","1/304","12/18866",0.177161950736108,0.177161950736108,0.4762613881731,"ATG5",1
GO:0043476,"GO:0043476","pigment accumulation","1/304","12/18866",0.177161950736108,0.177161950736108,0.4762613881731,"RAB32",1
GO:0043482,"GO:0043482","cellular pigment accumulation","1/304","12/18866",0.177161950736108,0.177161950736108,0.4762613881731,"RAB32",1
GO:0045161,"GO:0045161","neuronal ion channel clustering","1/304","12/18866",0.177161950736108,0.177161950736108,0.4762613881731,"PICK1",1
GO:0046929,"GO:0046929","negative regulation of neurotransmitter secretion","1/304","12/18866",0.177161950736108,0.177161950736108,0.4762613881731,"PRKN",1
GO:0051549,"GO:0051549","positive regulation of keratinocyte migration","1/304","12/18866",0.177161950736108,0.177161950736108,0.4762613881731,"IQSEC1",1
GO:0051583,"GO:0051583","dopamine uptake involved in synaptic transmission","1/304","12/18866",0.177161950736108,0.177161950736108,0.4762613881731,"PRKN",1
GO:0051934,"GO:0051934","catecholamine uptake involved in synaptic transmission","1/304","12/18866",0.177161950736108,0.177161950736108,0.4762613881731,"PRKN",1
GO:0055015,"GO:0055015","ventricular cardiac muscle cell development","1/304","12/18866",0.177161950736108,0.177161950736108,0.4762613881731,"ATG5",1
GO:0055062,"GO:0055062","phosphate ion homeostasis","1/304","12/18866",0.177161950736108,0.177161950736108,0.4762613881731,"FGFR4",1
GO:0060081,"GO:0060081","membrane hyperpolarization","1/304","12/18866",0.177161950736108,0.177161950736108,0.4762613881731,"KCTD7",1
GO:0060394,"GO:0060394","negative regulation of pathway-restricted SMAD protein phosphorylation","1/304","12/18866",0.177161950736108,0.177161950736108,0.4762613881731,"SMAD7",1
GO:0060442,"GO:0060442","branching involved in prostate gland morphogenesis","1/304","12/18866",0.177161950736108,0.177161950736108,0.4762613881731,"BMP7",1
GO:0060670,"GO:0060670","branching involved in labyrinthine layer morphogenesis","1/304","12/18866",0.177161950736108,0.177161950736108,0.4762613881731,"FZD5",1
GO:0060856,"GO:0060856","establishment of blood-brain barrier","1/304","12/18866",0.177161950736108,0.177161950736108,0.4762613881731,"CLDN3",1
GO:0070816,"GO:0070816","phosphorylation of RNA polymerase II C-terminal domain","1/304","12/18866",0.177161950736108,0.177161950736108,0.4762613881731,"CCNH",1
GO:0072178,"GO:0072178","nephric duct morphogenesis","1/304","12/18866",0.177161950736108,0.177161950736108,0.4762613881731,"EPHA4",1
GO:0072505,"GO:0072505","divalent inorganic anion homeostasis","1/304","12/18866",0.177161950736108,0.177161950736108,0.4762613881731,"FGFR4",1
GO:0072506,"GO:0072506","trivalent inorganic anion homeostasis","1/304","12/18866",0.177161950736108,0.177161950736108,0.4762613881731,"FGFR4",1
GO:0072537,"GO:0072537","fibroblast activation","1/304","12/18866",0.177161950736108,0.177161950736108,0.4762613881731,"GCLC",1
GO:0086067,"GO:0086067","AV node cell to bundle of His cell communication","1/304","12/18866",0.177161950736108,0.177161950736108,0.4762613881731,"CXADR",1
GO:0097201,"GO:0097201","negative regulation of transcription from RNA polymerase II promoter in response to stress","1/304","12/18866",0.177161950736108,0.177161950736108,0.4762613881731,"JUN",1
GO:1900115,"GO:1900115","extracellular regulation of signal transduction","1/304","12/18866",0.177161950736108,0.177161950736108,0.4762613881731,"FBN1",1
GO:1900116,"GO:1900116","extracellular negative regulation of signal transduction","1/304","12/18866",0.177161950736108,0.177161950736108,0.4762613881731,"FBN1",1
GO:1901298,"GO:1901298","regulation of hydrogen peroxide-mediated programmed cell death","1/304","12/18866",0.177161950736108,0.177161950736108,0.4762613881731,"FOXO3",1
GO:1902018,"GO:1902018","negative regulation of cilium assembly","1/304","12/18866",0.177161950736108,0.177161950736108,0.4762613881731,"ODF2L",1
GO:1902337,"GO:1902337","regulation of apoptotic process involved in morphogenesis","1/304","12/18866",0.177161950736108,0.177161950736108,0.4762613881731,"BMP7",1
GO:1902950,"GO:1902950","regulation of dendritic spine maintenance","1/304","12/18866",0.177161950736108,0.177161950736108,0.4762613881731,"FYN",1
GO:2000767,"GO:2000767","positive regulation of cytoplasmic translation","1/304","12/18866",0.177161950736108,0.177161950736108,0.4762613881731,"YBX3",1
GO:2001053,"GO:2001053","regulation of mesenchymal cell apoptotic process","1/304","12/18866",0.177161950736108,0.177161950736108,0.4762613881731,"BMP7",1
GO:2001204,"GO:2001204","regulation of osteoclast development","1/304","12/18866",0.177161950736108,0.177161950736108,0.4762613881731,"FBN1",1
GO:0006029,"GO:0006029","proteoglycan metabolic process","3/304","90/18866",0.177318380639926,0.177318380639926,0.4762613881731,"CHSY3/EXT1/VCAN",3
GO:0043044,"GO:0043044","ATP-dependent chromatin remodeling","3/304","90/18866",0.177318380639926,0.177318380639926,0.4762613881731,"ACTL6A/ACTR6/CENPI",3
GO:0030534,"GO:0030534","adult behavior","4/304","137/18866",0.180274054875262,0.180274054875262,0.478292929982276,"EPHA4/FOXA2/PRKN/SHANK2",4
GO:0008206,"GO:0008206","bile acid metabolic process","2/304","48/18866",0.180918420885654,0.180918420885654,0.478292929982276,"FGFR4/STARD4",2
GO:0043039,"GO:0043039","tRNA aminoacylation","2/304","48/18866",0.180918420885654,0.180918420885654,0.478292929982276,"DARS2/PPA2",2
GO:0043370,"GO:0043370","regulation of CD4-positive, alpha-beta T cell differentiation","2/304","48/18866",0.180918420885654,0.180918420885654,0.478292929982276,"RIPK2/SMAD7",2
GO:0055023,"GO:0055023","positive regulation of cardiac muscle tissue growth","2/304","48/18866",0.180918420885654,0.180918420885654,0.478292929982276,"EDN1/GLI1",2
GO:0061001,"GO:0061001","regulation of dendritic spine morphogenesis","2/304","48/18866",0.180918420885654,0.180918420885654,0.478292929982276,"DBN1/EPHA4",2
GO:0001656,"GO:0001656","metanephros development","3/304","91/18866",0.181334012691749,0.181334012691749,0.478292929982276,"BMP7/FBN1/GREB1L",3
GO:0006094,"GO:0006094","gluconeogenesis","3/304","91/18866",0.181334012691749,0.181334012691749,0.478292929982276,"KAT2B/SLC25A13/SLC35B4",3
GO:0015914,"GO:0015914","phospholipid transport","3/304","91/18866",0.181334012691749,0.181334012691749,0.478292929982276,"DBI/LDLR/PLTP",3
GO:0033273,"GO:0033273","response to vitamin","3/304","91/18866",0.181334012691749,0.181334012691749,0.478292929982276,"BMP7/MED1/SPP1",3
GO:0045682,"GO:0045682","regulation of epidermis development","3/304","91/18866",0.181334012691749,0.181334012691749,0.478292929982276,"CD109/MED1/NAB2",3
GO:0097306,"GO:0097306","cellular response to alcohol","3/304","91/18866",0.181334012691749,0.181334012691749,0.478292929982276,"ADCY7/FDX1/FOXO3",3
GO:1901379,"GO:1901379","regulation of potassium ion transmembrane transport","3/304","91/18866",0.181334012691749,0.181334012691749,0.478292929982276,"KCNS1/NETO2/RGS4",3
GO:1903706,"GO:1903706","regulation of hemopoiesis","11/304","498/18866",0.18227064153991,0.18227064153991,0.478292929982276,"CAMK4/CREB1/FBN1/FOXO3/JUN/KAT2B/KMT2E/MAFB/MED1/RIPK2/SMAD7",11
GO:0044242,"GO:0044242","cellular lipid catabolic process","6/304","236/18866",0.182277521452381,0.182277521452381,0.478292929982276,"ACER3/FABP5/GM2A/IRS2/LDLR/PLBD1",6
GO:0021700,"GO:0021700","developmental maturation","7/304","287/18866",0.182310966300639,0.182310966300639,0.478292929982276,"FOXO3/FZD5/PICK1/RAB32/SNX19/UNC13A/YWHAZ",7
GO:0000724,"GO:0000724","double-strand break repair via homologous recombination","4/304","138/18866",0.18348313295359,0.18348313295359,0.478292929982276,"FANCB/KLHL15/MCM7/RNF138",4
GO:0001508,"GO:0001508","action potential","4/304","138/18866",0.18348313295359,0.18348313295359,0.478292929982276,"CXADR/KCNMB4/PKP2/SCN9A",4
GO:0006638,"GO:0006638","neutral lipid metabolic process","4/304","138/18866",0.18348313295359,0.18348313295359,0.478292929982276,"FABP5/INSIG1/LDLR/SLC22A4",4
GO:0006639,"GO:0006639","acylglycerol metabolic process","4/304","138/18866",0.18348313295359,0.18348313295359,0.478292929982276,"FABP5/INSIG1/LDLR/SLC22A4",4
GO:0000209,"GO:0000209","protein polyubiquitination","8/304","340/18866",0.184632208827392,0.184632208827392,0.478292929982276,"FBXL13/FBXO27/FBXW11/PRKN/RNF19B/SMURF2/TRIM6/UBE2O",8
GO:0006520,"GO:0006520","cellular amino acid metabolic process","8/304","340/18866",0.184632208827392,0.184632208827392,0.478292929982276,"ASL/ASS1/DARS2/DBT/DPYD/GCLC/HNF4A/PPA2",8
GO:0002686,"GO:0002686","negative regulation of leukocyte migration","2/304","49/18866",0.186731300320979,0.186731300320979,0.478292929982276,"MIA3/SLIT2",2
GO:0003254,"GO:0003254","regulation of membrane depolarization","2/304","49/18866",0.186731300320979,0.186731300320979,0.478292929982276,"GCLC/SMAD7",2
GO:0006111,"GO:0006111","regulation of gluconeogenesis","2/304","49/18866",0.186731300320979,0.186731300320979,0.478292929982276,"KAT2B/SLC35B4",2
GO:0006692,"GO:0006692","prostanoid metabolic process","2/304","49/18866",0.186731300320979,0.186731300320979,0.478292929982276,"EDN1/FABP5",2
GO:0006693,"GO:0006693","prostaglandin metabolic process","2/304","49/18866",0.186731300320979,0.186731300320979,0.478292929982276,"EDN1/FABP5",2
GO:0007595,"GO:0007595","lactation","2/304","49/18866",0.186731300320979,0.186731300320979,0.478292929982276,"CREB1/MED1",2
GO:0009395,"GO:0009395","phospholipid catabolic process","2/304","49/18866",0.186731300320979,0.186731300320979,0.478292929982276,"LDLR/PLBD1",2
GO:0015872,"GO:0015872","dopamine transport","2/304","49/18866",0.186731300320979,0.186731300320979,0.478292929982276,"PRKN/SYT12",2
GO:0030850,"GO:0030850","prostate gland development","2/304","49/18866",0.186731300320979,0.186731300320979,0.478292929982276,"BMP7/GLI1",2
GO:0034656,"GO:0034656","nucleobase-containing small molecule catabolic process","2/304","49/18866",0.186731300320979,0.186731300320979,0.478292929982276,"DPYD/ENTPD8",2
GO:0042398,"GO:0042398","cellular modified amino acid biosynthetic process","2/304","49/18866",0.186731300320979,0.186731300320979,0.478292929982276,"GCH1/GCLC",2
GO:0043038,"GO:0043038","amino acid activation","2/304","49/18866",0.186731300320979,0.186731300320979,0.478292929982276,"DARS2/PPA2",2
GO:1990090,"GO:1990090","cellular response to nerve growth factor stimulus","2/304","49/18866",0.186731300320979,0.186731300320979,0.478292929982276,"CREB1/FOXO3",2
GO:0043123,"GO:0043123","positive regulation of I-kappaB kinase/NF-kappaB signaling","5/304","188/18866",0.187503952774341,0.187503952774341,0.478292929982276,"EDAR/FYN/PRKN/RIPK2/TRIM6",5
GO:1902105,"GO:1902105","regulation of leukocyte differentiation","7/304","290/18866",0.18884482643209,0.18884482643209,0.478292929982276,"CAMK4/CREB1/FBN1/JUN/MAFB/RIPK2/SMAD7",7
GO:0031146,"GO:0031146","SCF-dependent proteasomal ubiquitin-dependent protein catabolic process","3/304","93/18866",0.189437670440521,0.189437670440521,0.478292929982276,"FBXL13/FBXO27/FBXW11",3
GO:0045185,"GO:0045185","maintenance of protein location","3/304","93/18866",0.189437670440521,0.189437670440521,0.478292929982276,"DBN1/FBN1/INSIG1",3
GO:0051702,"GO:0051702","interaction with symbiont","3/304","93/18866",0.189437670440521,0.189437670440521,0.478292929982276,"FN1/JUN/PRKN",3
GO:0000725,"GO:0000725","recombinational repair","4/304","140/18866",0.189957171844302,0.189957171844302,0.478292929982276,"FANCB/KLHL15/MCM7/RNF138",4
GO:0048284,"GO:0048284","organelle fusion","4/304","140/18866",0.189957171844302,0.189957171844302,0.478292929982276,"ATP13A2/BNIP3/PRKN/VAMP1",4
GO:0072655,"GO:0072655","establishment of protein localization to mitochondrion","4/304","140/18866",0.189957171844302,0.189957171844302,0.478292929982276,"ABLIM3/FZD5/PRKN/YWHAZ",4
GO:0097553,"GO:0097553","calcium ion transmembrane import into cytosol","4/304","140/18866",0.189957171844302,0.189957171844302,0.478292929982276,"ATG5/ERO1A/FYN/TRPC1",4
GO:0007369,"GO:0007369","gastrulation","5/304","189/18866",0.190265032355334,0.190265032355334,0.478292929982276,"BMP7/EXT1/FN1/FOXA2/HNF4A",5
GO:0002903,"GO:0002903","negative regulation of B cell apoptotic process","1/304","13/18866",0.190429308696023,0.190429308696023,0.478292929982276,"IRS2",1
GO:0005513,"GO:0005513","detection of calcium ion","1/304","13/18866",0.190429308696023,0.190429308696023,0.478292929982276,"KCNMB4",1
GO:0006995,"GO:0006995","cellular response to nitrogen starvation","1/304","13/18866",0.190429308696023,0.190429308696023,0.478292929982276,"ATG5",1
GO:0007494,"GO:0007494","midgut development","1/304","13/18866",0.190429308696023,0.190429308696023,0.478292929982276,"ASS1",1
GO:0009265,"GO:0009265","2'-deoxyribonucleotide biosynthetic process","1/304","13/18866",0.190429308696023,0.190429308696023,0.478292929982276,"TBPL1",1
GO:0009313,"GO:0009313","oligosaccharide catabolic process","1/304","13/18866",0.190429308696023,0.190429308696023,0.478292929982276,"GM2A",1
GO:0009437,"GO:0009437","carnitine metabolic process","1/304","13/18866",0.190429308696023,0.190429308696023,0.478292929982276,"SLC22A4",1
GO:0009886,"GO:0009886","post-embryonic animal morphogenesis","1/304","13/18866",0.190429308696023,0.190429308696023,0.478292929982276,"FBN1",1
GO:0010642,"GO:0010642","negative regulation of platelet-derived growth factor receptor signaling pathway","1/304","13/18866",0.190429308696023,0.190429308696023,0.478292929982276,"PHF14",1
GO:0010826,"GO:0010826","negative regulation of centrosome duplication","1/304","13/18866",0.190429308696023,0.190429308696023,0.478292929982276,"KAT2B",1
GO:0010870,"GO:0010870","positive regulation of receptor biosynthetic process","1/304","13/18866",0.190429308696023,0.190429308696023,0.478292929982276,"EDN1",1
GO:0015697,"GO:0015697","quaternary ammonium group transport","1/304","13/18866",0.190429308696023,0.190429308696023,0.478292929982276,"SLC22A4",1
GO:0015801,"GO:0015801","aromatic amino acid transport","1/304","13/18866",0.190429308696023,0.190429308696023,0.478292929982276,"SLC36A4",1
GO:0015816,"GO:0015816","glycine transport","1/304","13/18866",0.190429308696023,0.190429308696023,0.478292929982276,"RGS4",1
GO:0019336,"GO:0019336","phenol-containing compound catabolic process","1/304","13/18866",0.190429308696023,0.190429308696023,0.478292929982276,"MOXD1",1
GO:0030205,"GO:0030205","dermatan sulfate metabolic process","1/304","13/18866",0.190429308696023,0.190429308696023,0.478292929982276,"VCAN",1
GO:0031953,"GO:0031953","negative regulation of protein autophosphorylation","1/304","13/18866",0.190429308696023,0.190429308696023,0.478292929982276,"JUN",1
GO:0033145,"GO:0033145","positive regulation of intracellular steroid hormone receptor signaling pathway","1/304","13/18866",0.190429308696023,0.190429308696023,0.478292929982276,"MED1",1
GO:0033147,"GO:0033147","negative regulation of intracellular estrogen receptor signaling pathway","1/304","13/18866",0.190429308696023,0.190429308696023,0.478292929982276,"LBH",1
GO:0043248,"GO:0043248","proteasome assembly","1/304","13/18866",0.190429308696023,0.190429308696023,0.478292929982276,"PSMG1",1
GO:0043562,"GO:0043562","cellular response to nitrogen levels","1/304","13/18866",0.190429308696023,0.190429308696023,0.478292929982276,"ATG5",1
GO:0043970,"GO:0043970","histone H3-K9 acetylation","1/304","13/18866",0.190429308696023,0.190429308696023,0.478292929982276,"KAT2B",1
GO:0046385,"GO:0046385","deoxyribose phosphate biosynthetic process","1/304","13/18866",0.190429308696023,0.190429308696023,0.478292929982276,"TBPL1",1
GO:0048096,"GO:0048096","chromatin-mediated maintenance of transcription","1/304","13/18866",0.190429308696023,0.190429308696023,0.478292929982276,"SMARCD1",1
GO:0048266,"GO:0048266","behavioral response to pain","1/304","13/18866",0.190429308696023,0.190429308696023,0.478292929982276,"SCN9A",1
GO:0048505,"GO:0048505","regulation of timing of cell differentiation","1/304","13/18866",0.190429308696023,0.190429308696023,0.478292929982276,"GDPD5",1
GO:0050910,"GO:0050910","detection of mechanical stimulus involved in sensory perception of sound","1/304","13/18866",0.190429308696023,0.190429308696023,0.478292929982276,"WHRN",1
GO:0055091,"GO:0055091","phospholipid homeostasis","1/304","13/18866",0.190429308696023,0.190429308696023,0.478292929982276,"HNF4A",1
GO:0060221,"GO:0060221","retinal rod cell differentiation","1/304","13/18866",0.190429308696023,0.190429308696023,0.478292929982276,"RORB",1
GO:0060340,"GO:0060340","positive regulation of type I interferon-mediated signaling pathway","1/304","13/18866",0.190429308696023,0.190429308696023,0.478292929982276,"TRIM6",1
GO:0060601,"GO:0060601","lateral sprouting from an epithelium","1/304","13/18866",0.190429308696023,0.190429308696023,0.478292929982276,"BMP7",1
GO:0061029,"GO:0061029","eyelid development in camera-type eye","1/304","13/18866",0.190429308696023,0.190429308696023,0.478292929982276,"JUN",1
GO:0061052,"GO:0061052","negative regulation of cell growth involved in cardiac muscle cell development","1/304","13/18866",0.190429308696023,0.190429308696023,0.478292929982276,"RGS4",1
GO:0070071,"GO:0070071","proton-transporting two-sector ATPase complex assembly","1/304","13/18866",0.190429308696023,0.190429308696023,0.478292929982276,"VMA21",1
GO:0097152,"GO:0097152","mesenchymal cell apoptotic process","1/304","13/18866",0.190429308696023,0.190429308696023,0.478292929982276,"BMP7",1
GO:0098789,"GO:0098789","pre-mRNA cleavage required for polyadenylation","1/304","13/18866",0.190429308696023,0.190429308696023,0.478292929982276,"CPSF6",1
GO:0098974,"GO:0098974","postsynaptic actin cytoskeleton organization","1/304","13/18866",0.190429308696023,0.190429308696023,0.478292929982276,"DBN1",1
GO:1900272,"GO:1900272","negative regulation of long-term synaptic potentiation","1/304","13/18866",0.190429308696023,0.190429308696023,0.478292929982276,"EPHA4",1
GO:1902916,"GO:1902916","positive regulation of protein polyubiquitination","1/304","13/18866",0.190429308696023,0.190429308696023,0.478292929982276,"PRKN",1
GO:1902947,"GO:1902947","regulation of tau-protein kinase activity","1/304","13/18866",0.190429308696023,0.190429308696023,0.478292929982276,"NAB2",1
GO:1903651,"GO:1903651","positive regulation of cytoplasmic transport","1/304","13/18866",0.190429308696023,0.190429308696023,0.478292929982276,"PRKN",1
GO:1905244,"GO:1905244","regulation of modification of synaptic structure","1/304","13/18866",0.190429308696023,0.190429308696023,0.478292929982276,"EPHA4",1
GO:2000052,"GO:2000052","positive regulation of non-canonical Wnt signaling pathway","1/304","13/18866",0.190429308696023,0.190429308696023,0.478292929982276,"ANKRD6",1
GO:0001774,"GO:0001774","microglial cell activation","2/304","50/18866",0.192570045066984,0.192570045066984,0.478292929982276,"JUN/LDLR",2
GO:0002269,"GO:0002269","leukocyte activation involved in inflammatory response","2/304","50/18866",0.192570045066984,0.192570045066984,0.478292929982276,"JUN/LDLR",2
GO:0007528,"GO:0007528","neuromuscular junction development","2/304","50/18866",0.192570045066984,0.192570045066984,0.478292929982276,"SHANK2/UNC13A",2
GO:0010718,"GO:0010718","positive regulation of epithelial to mesenchymal transition","2/304","50/18866",0.192570045066984,0.192570045066984,0.478292929982276,"BMP7/TGFB1I1",2
GO:0031648,"GO:0031648","protein destabilization","2/304","50/18866",0.192570045066984,0.192570045066984,0.478292929982276,"FBXW11/PRKN",2
GO:0043616,"GO:0043616","keratinocyte proliferation","2/304","50/18866",0.192570045066984,0.192570045066984,0.478292929982276,"CD109/MED1",2
GO:0046850,"GO:0046850","regulation of bone remodeling","2/304","50/18866",0.192570045066984,0.192570045066984,0.478292929982276,"PDK4/SPP1",2
GO:0071715,"GO:0071715","icosanoid transport","2/304","50/18866",0.192570045066984,0.192570045066984,0.478292929982276,"EDN1/PROCA1",2
GO:1901571,"GO:1901571","fatty acid derivative transport","2/304","50/18866",0.192570045066984,0.192570045066984,0.478292929982276,"EDN1/PROCA1",2
GO:1904707,"GO:1904707","positive regulation of vascular associated smooth muscle cell proliferation","2/304","50/18866",0.192570045066984,0.192570045066984,0.478292929982276,"EDN1/JUN",2
GO:2000725,"GO:2000725","regulation of cardiac muscle cell differentiation","2/304","50/18866",0.192570045066984,0.192570045066984,0.478292929982276,"EDN1/RGS4",2
GO:0042493,"GO:0042493","response to drug","9/304","397/18866",0.192821025566616,0.192821025566616,0.478292929982276,"ASS1/ATG5/CREB1/EDN1/FOXO3/FYN/GGH/MCM7/PPOX",9
GO:0010660,"GO:0010660","regulation of muscle cell apoptotic process","3/304","94/18866",0.193524005952757,0.193524005952757,0.478292929982276,"BMP7/BNIP3/EDN1",3
GO:0019319,"GO:0019319","hexose biosynthetic process","3/304","94/18866",0.193524005952757,0.193524005952757,0.478292929982276,"KAT2B/SLC25A13/SLC35B4",3
GO:0035265,"GO:0035265","organ growth","5/304","191/18866",0.195830571742673,0.195830571742673,0.478292929982276,"CXADR/EDN1/GLI1/RGS4/YBX3",5
GO:0030879,"GO:0030879","mammary gland development","4/304","142/18866",0.196502970443222,0.196502970443222,0.478292929982276,"CREB1/IRS2/LBH/MED1",4
GO:0051668,"GO:0051668","localization within membrane","3/304","95/18866",0.197632228018677,0.197632228018677,0.478292929982276,"INSIG1/MIA3/PICK1",3
GO:0097711,"GO:0097711","ciliary basal body-plasma membrane docking","3/304","95/18866",0.197632228018677,0.197632228018677,0.478292929982276,"CEP57/CETN2/PLK4",3
GO:0002762,"GO:0002762","negative regulation of myeloid leukocyte differentiation","2/304","51/18866",0.198432322515808,0.198432322515808,0.478292929982276,"FBN1/MAFB",2
GO:0006984,"GO:0006984","ER-nucleus signaling pathway","2/304","51/18866",0.198432322515808,0.198432322515808,0.478292929982276,"ATG10/INSIG1",2
GO:0021879,"GO:0021879","forebrain neuron differentiation","2/304","51/18866",0.198432322515808,0.198432322515808,0.478292929982276,"SLIT2/ZSWIM6",2
GO:0035272,"GO:0035272","exocrine system development","2/304","51/18866",0.198432322515808,0.198432322515808,0.478292929982276,"BMP7/EDAR",2
GO:0038084,"GO:0038084","vascular endothelial growth factor signaling pathway","2/304","51/18866",0.198432322515808,0.198432322515808,0.478292929982276,"ADAMTS3/MYO1C",2
GO:0045912,"GO:0045912","negative regulation of carbohydrate metabolic process","2/304","51/18866",0.198432322515808,0.198432322515808,0.478292929982276,"FOXA2/PRKN",2
GO:0090102,"GO:0090102","cochlea development","2/304","51/18866",0.198432322515808,0.198432322515808,0.478292929982276,"EPHA4/SOBP",2
GO:1902893,"GO:1902893","regulation of pri-miRNA transcription by RNA polymerase II","2/304","51/18866",0.198432322515808,0.198432322515808,0.478292929982276,"FOXO3/JUN",2
GO:0021953,"GO:0021953","central nervous system neuron differentiation","5/304","192/18866",0.198634543711086,0.198634543711086,0.478292929982276,"AGTPBP1/EPHA4/GDPD5/SLIT2/ZSWIM6",5
GO:0009150,"GO:0009150","purine ribonucleotide metabolic process","9/304","401/18866",0.200417244259186,0.200417244259186,0.478292929982276,"ADCY7/BPGM/DBI/ELOVL7/HACD1/NME9/PDK4/PDP1/SLC25A13",9
GO:0000045,"GO:0000045","autophagosome assembly","3/304","96/18866",0.201761505363085,0.201761505363085,0.478292929982276,"ATG16L2/ATG5/RAB33B",3
GO:0070585,"GO:0070585","protein localization to mitochondrion","4/304","144/18866",0.203117220492815,0.203117220492815,0.478292929982276,"ABLIM3/FZD5/PRKN/YWHAZ",4
GO:0003188,"GO:0003188","heart valve formation","1/304","14/18866",0.203483437490189,0.203483437490189,0.478292929982276,"HEY1",1
GO:0006241,"GO:0006241","CTP biosynthetic process","1/304","14/18866",0.203483437490189,0.203483437490189,0.478292929982276,"NME9",1
GO:0010248,"GO:0010248","establishment or maintenance of transmembrane electrochemical gradient","1/304","14/18866",0.203483437490189,0.203483437490189,0.478292929982276,"FXYD2",1
GO:0010421,"GO:0010421","hydrogen peroxide-mediated programmed cell death","1/304","14/18866",0.203483437490189,0.203483437490189,0.478292929982276,"FOXO3",1
GO:0010872,"GO:0010872","regulation of cholesterol esterification","1/304","14/18866",0.203483437490189,0.203483437490189,0.478292929982276,"STARD4",1
GO:0010917,"GO:0010917","negative regulation of mitochondrial membrane potential","1/304","14/18866",0.203483437490189,0.203483437490189,0.478292929982276,"BNIP3",1
GO:0030007,"GO:0030007","cellular potassium ion homeostasis","1/304","14/18866",0.203483437490189,0.203483437490189,0.478292929982276,"KCTD7",1
GO:0030207,"GO:0030207","chondroitin sulfate catabolic process","1/304","14/18866",0.203483437490189,0.203483437490189,0.478292929982276,"VCAN",1
GO:0030836,"GO:0030836","positive regulation of actin filament depolymerization","1/304","14/18866",0.203483437490189,0.203483437490189,0.478292929982276,"SEMA5A",1
GO:0032310,"GO:0032310","prostaglandin secretion","1/304","14/18866",0.203483437490189,0.203483437490189,0.478292929982276,"EDN1",1
GO:0032933,"GO:0032933","SREBP signaling pathway","1/304","14/18866",0.203483437490189,0.203483437490189,0.478292929982276,"INSIG1",1
GO:0034392,"GO:0034392","negative regulation of smooth muscle cell apoptotic process","1/304","14/18866",0.203483437490189,0.203483437490189,0.478292929982276,"EDN1",1
GO:0035358,"GO:0035358","regulation of peroxisome proliferator activated receptor signaling pathway","1/304","14/18866",0.203483437490189,0.203483437490189,0.478292929982276,"FABP5",1
GO:0035437,"GO:0035437","maintenance of protein localization in endoplasmic reticulum","1/304","14/18866",0.203483437490189,0.203483437490189,0.478292929982276,"INSIG1",1
GO:0035627,"GO:0035627","ceramide transport","1/304","14/18866",0.203483437490189,0.203483437490189,0.478292929982276,"PLTP",1
GO:0035810,"GO:0035810","positive regulation of urine volume","1/304","14/18866",0.203483437490189,0.203483437490189,0.478292929982276,"EDN1",1
GO:0035815,"GO:0035815","positive regulation of renal sodium excretion","1/304","14/18866",0.203483437490189,0.203483437490189,0.478292929982276,"EDN1",1
GO:0040034,"GO:0040034","regulation of development, heterochronic","1/304","14/18866",0.203483437490189,0.203483437490189,0.478292929982276,"GDPD5",1
GO:0043922,"GO:0043922","negative regulation by host of viral transcription","1/304","14/18866",0.203483437490189,0.203483437490189,0.478292929982276,"JUN",1
GO:0044154,"GO:0044154","histone H3-K14 acetylation","1/304","14/18866",0.203483437490189,0.203483437490189,0.478292929982276,"PHF14",1
GO:0044793,"GO:0044793","negative regulation by host of viral process","1/304","14/18866",0.203483437490189,0.203483437490189,0.478292929982276,"PRKN",1
GO:0044804,"GO:0044804","autophagy of nucleus","1/304","14/18866",0.203483437490189,0.203483437490189,0.478292929982276,"ATG5",1
GO:0045217,"GO:0045217","cell-cell junction maintenance","1/304","14/18866",0.203483437490189,0.203483437490189,0.478292929982276,"WHRN",1
GO:0045898,"GO:0045898","regulation of RNA polymerase II transcription preinitiation complex assembly","1/304","14/18866",0.203483437490189,0.203483437490189,0.478292929982276,"CREB1",1
GO:0046036,"GO:0046036","CTP metabolic process","1/304","14/18866",0.203483437490189,0.203483437490189,0.478292929982276,"NME9",1
GO:0046321,"GO:0046321","positive regulation of fatty acid oxidation","1/304","14/18866",0.203483437490189,0.203483437490189,0.478292929982276,"IRS2",1
GO:0046512,"GO:0046512","sphingosine biosynthetic process","1/304","14/18866",0.203483437490189,0.203483437490189,0.478292929982276,"ACER3",1
GO:0046520,"GO:0046520","sphingoid biosynthetic process","1/304","14/18866",0.203483437490189,0.203483437490189,0.478292929982276,"ACER3",1
GO:0047484,"GO:0047484","regulation of response to osmotic stress","1/304","14/18866",0.203483437490189,0.203483437490189,0.478292929982276,"YBX3",1
GO:0051547,"GO:0051547","regulation of keratinocyte migration","1/304","14/18866",0.203483437490189,0.203483437490189,0.478292929982276,"IQSEC1",1
GO:0051645,"GO:0051645","Golgi localization","1/304","14/18866",0.203483437490189,0.203483437490189,0.478292929982276,"YWHAZ",1
GO:0060088,"GO:0060088","auditory receptor cell stereocilium organization","1/304","14/18866",0.203483437490189,0.203483437490189,0.478292929982276,"WHRN",1
GO:0060707,"GO:0060707","trophoblast giant cell differentiation","1/304","14/18866",0.203483437490189,0.203483437490189,0.478292929982276,"PLK4",1
GO:0060831,"GO:0060831","smoothened signaling pathway involved in dorsal/ventral neural tube patterning","1/304","14/18866",0.203483437490189,0.203483437490189,0.478292929982276,"GPR161",1
GO:0061051,"GO:0061051","positive regulation of cell growth involved in cardiac muscle cell development","1/304","14/18866",0.203483437490189,0.203483437490189,0.478292929982276,"EDN1",1
GO:0070431,"GO:0070431","nucleotide-binding oligomerization domain containing 2 signaling pathway","1/304","14/18866",0.203483437490189,0.203483437490189,0.478292929982276,"RIPK2",1
GO:0070486,"GO:0070486","leukocyte aggregation","1/304","14/18866",0.203483437490189,0.203483437490189,0.478292929982276,"BMP7",1
GO:0071285,"GO:0071285","cellular response to lithium ion","1/304","14/18866",0.203483437490189,0.203483437490189,0.478292929982276,"ADCY7",1
GO:0071361,"GO:0071361","cellular response to ethanol","1/304","14/18866",0.203483437490189,0.203483437490189,0.478292929982276,"ADCY7",1
GO:0072350,"GO:0072350","tricarboxylic acid metabolic process","1/304","14/18866",0.203483437490189,0.203483437490189,0.478292929982276,"ASS1",1
GO:0086069,"GO:0086069","bundle of His cell to Purkinje myocyte communication","1/304","14/18866",0.203483437490189,0.203483437490189,0.478292929982276,"PKP2",1
GO:0090128,"GO:0090128","regulation of synapse maturation","1/304","14/18866",0.203483437490189,0.203483437490189,0.478292929982276,"YWHAZ",1
GO:0090231,"GO:0090231","regulation of spindle checkpoint","1/304","14/18866",0.203483437490189,0.203483437490189,0.478292929982276,"DYNC1LI1",1
GO:0090239,"GO:0090239","regulation of histone H4 acetylation","1/304","14/18866",0.203483437490189,0.203483437490189,0.478292929982276,"ATG5",1
GO:0090266,"GO:0090266","regulation of mitotic cell cycle spindle assembly checkpoint","1/304","14/18866",0.203483437490189,0.203483437490189,0.478292929982276,"DYNC1LI1",1
GO:0097468,"GO:0097468","programmed cell death in response to reactive oxygen species","1/304","14/18866",0.203483437490189,0.203483437490189,0.478292929982276,"FOXO3",1
GO:0098787,"GO:0098787","mRNA cleavage involved in mRNA processing","1/304","14/18866",0.203483437490189,0.203483437490189,0.478292929982276,"CPSF6",1
GO:0098814,"GO:0098814","spontaneous synaptic transmission","1/304","14/18866",0.203483437490189,0.203483437490189,0.478292929982276,"PRKN",1
GO:1901070,"GO:1901070","guanosine-containing compound biosynthetic process","1/304","14/18866",0.203483437490189,0.203483437490189,0.478292929982276,"NME9",1
GO:1901722,"GO:1901722","regulation of cell proliferation involved in kidney development","1/304","14/18866",0.203483437490189,0.203483437490189,0.478292929982276,"BMP7",1
GO:1903504,"GO:1903504","regulation of mitotic spindle checkpoint","1/304","14/18866",0.203483437490189,0.203483437490189,0.478292929982276,"DYNC1LI1",1
GO:1904748,"GO:1904748","regulation of apoptotic process involved in development","1/304","14/18866",0.203483437490189,0.203483437490189,0.478292929982276,"BMP7",1
GO:1904925,"GO:1904925","positive regulation of autophagy of mitochondrion in response to mitochondrial depolarization","1/304","14/18866",0.203483437490189,0.203483437490189,0.478292929982276,"PRKN",1
GO:1990173,"GO:1990173","protein localization to nucleoplasm","1/304","14/18866",0.203483437490189,0.203483437490189,0.478292929982276,"TBRG1",1
GO:2000232,"GO:2000232","regulation of rRNA processing","1/304","14/18866",0.203483437490189,0.203483437490189,0.478292929982276,"KAT2B",1
GO:2000543,"GO:2000543","positive regulation of gastrulation","1/304","14/18866",0.203483437490189,0.203483437490189,0.478292929982276,"FOXA2",1
GO:2001279,"GO:2001279","regulation of unsaturated fatty acid biosynthetic process","1/304","14/18866",0.203483437490189,0.203483437490189,0.478292929982276,"FABP5",1
GO:0046578,"GO:0046578","regulation of Ras protein signal transduction","5/304","194/18866",0.204283664322475,0.204283664322475,0.478292929982276,"ARHGEF25/IQSEC1/IRS2/RASA2/SSX2IP",5
GO:1902115,"GO:1902115","regulation of organelle assembly","5/304","194/18866",0.204283664322475,0.204283664322475,0.478292929982276,"ATG5/EDN1/KAT2B/ODF2L/PLK4",5
GO:0000186,"GO:0000186","activation of MAPKK activity","2/304","52/18866",0.204315868051724,0.204315868051724,0.478292929982276,"BRAF/RIPK2",2
GO:0003179,"GO:0003179","heart valve morphogenesis","2/304","52/18866",0.204315868051724,0.204315868051724,0.478292929982276,"HEY1/SLIT2",2
GO:0009948,"GO:0009948","anterior/posterior axis specification","2/304","52/18866",0.204315868051724,0.204315868051724,0.478292929982276,"FOXA2/FZD5",2
GO:0045839,"GO:0045839","negative regulation of mitotic nuclear division","2/304","52/18866",0.204315868051724,0.204315868051724,0.478292929982276,"BMP7/DYNC1LI1",2
GO:0050999,"GO:0050999","regulation of nitric-oxide synthase activity","2/304","52/18866",0.204315868051724,0.204315868051724,0.478292929982276,"GCH1/LYPLA1",2
GO:0060421,"GO:0060421","positive regulation of heart growth","2/304","52/18866",0.204315868051724,0.204315868051724,0.478292929982276,"EDN1/GLI1",2
GO:0071622,"GO:0071622","regulation of granulocyte chemotaxis","2/304","52/18866",0.204315868051724,0.204315868051724,0.478292929982276,"EDN1/SLIT2",2
GO:0072132,"GO:0072132","mesenchyme morphogenesis","2/304","52/18866",0.204315868051724,0.204315868051724,0.478292929982276,"BMP7/HEY1",2
GO:1990089,"GO:1990089","response to nerve growth factor","2/304","52/18866",0.204315868051724,0.204315868051724,0.478292929982276,"CREB1/FOXO3",2
GO:2000677,"GO:2000677","regulation of transcription regulatory region DNA binding","2/304","52/18866",0.204315868051724,0.204315868051724,0.478292929982276,"HEY1/TRIM6",2
GO:0030516,"GO:0030516","regulation of axon extension","3/304","97/18866",0.205911012744881,0.205911012744881,0.481365864751949,"DBN1/FN1/SEMA5A",3
GO:0036473,"GO:0036473","cell death in response to oxidative stress","3/304","97/18866",0.205911012744881,0.205911012744881,0.481365864751949,"FOXO3/FYN/PRKN",3
GO:1901136,"GO:1901136","carbohydrate derivative catabolic process","5/304","195/18866",0.207128318816026,0.207128318816026,0.483879727517976,"DPYD/FBXO27/GM2A/GPC5/VCAN",5
GO:0016358,"GO:0016358","dendrite development","6/304","247/18866",0.209394285708027,0.209394285708027,0.485880238197239,"BMP7/DBN1/EPHA4/FYN/IQSEC1/SHANK2",6
GO:0042542,"GO:0042542","response to hydrogen peroxide","4/304","146/18866",0.20979660945321,0.20979660945321,0.485880238197239,"BNIP3/FOXO3/FYN/JUN",4
GO:0048813,"GO:0048813","dendrite morphogenesis","4/304","146/18866",0.20979660945321,0.20979660945321,0.485880238197239,"DBN1/EPHA4/FYN/SHANK2",4
GO:0010657,"GO:0010657","muscle cell apoptotic process","3/304","98/18866",0.210079931216672,0.210079931216672,0.485880238197239,"BMP7/BNIP3/EDN1",3
GO:0010771,"GO:0010771","negative regulation of cell morphogenesis involved in differentiation","3/304","98/18866",0.210079931216672,0.210079931216672,0.485880238197239,"SEMA5A/SLIT2/SPP1",3
GO:0009311,"GO:0009311","oligosaccharide metabolic process","2/304","53/18866",0.210218483477833,0.210218483477833,0.485880238197239,"BRAF/GM2A",2
GO:0032731,"GO:0032731","positive regulation of interleukin-1 beta production","2/304","53/18866",0.210218483477833,0.210218483477833,0.485880238197239,"FZD5/RIPK2",2
GO:0043331,"GO:0043331","response to dsRNA","2/304","53/18866",0.210218483477833,0.210218483477833,0.485880238197239,"PDE12/RIPK2",2
GO:0043392,"GO:0043392","negative regulation of DNA binding","2/304","53/18866",0.210218483477833,0.210218483477833,0.485880238197239,"HEY1/JUN",2
GO:0045599,"GO:0045599","negative regulation of fat cell differentiation","2/304","53/18866",0.210218483477833,0.210218483477833,0.485880238197239,"INSIG1/TGFB1I1",2
GO:0048168,"GO:0048168","regulation of neuronal synaptic plasticity","2/304","53/18866",0.210218483477833,0.210218483477833,0.485880238197239,"DBN1/UNC13A",2
GO:0061614,"GO:0061614","pri-miRNA transcription by RNA polymerase II","2/304","53/18866",0.210218483477833,0.210218483477833,0.485880238197239,"FOXO3/JUN",2
GO:0071320,"GO:0071320","cellular response to cAMP","2/304","53/18866",0.210218483477833,0.210218483477833,0.485880238197239,"ASS1/FDX1",2
GO:0046467,"GO:0046467","membrane lipid biosynthetic process","4/304","147/18866",0.213159695825367,0.213159695825367,0.485880238197239,"ACER3/ELOVL7/HACD1/PIGM",4
GO:0006626,"GO:0006626","protein targeting to mitochondrion","3/304","99/18866",0.21426744837077,0.21426744837077,0.485880238197239,"ABLIM3/FZD5/PRKN",3
GO:0043473,"GO:0043473","pigmentation","3/304","99/18866",0.21426744837077,0.21426744837077,0.485880238197239,"EDAR/RAB32/USP13",3
GO:0051817,"GO:0051817","modulation of process of other organism involved in symbiotic interaction","3/304","99/18866",0.21426744837077,0.21426744837077,0.485880238197239,"ATG5/JUN/PRKN",3
GO:0030834,"GO:0030834","regulation of actin filament depolymerization","2/304","54/18866",0.216138035475523,0.216138035475523,0.485880238197239,"PLEKHH2/SEMA5A",2
GO:0051438,"GO:0051438","regulation of ubiquitin-protein transferase activity","2/304","54/18866",0.216138035475523,0.216138035475523,0.485880238197239,"DCUN1D5/SMAD7",2
GO:0006828,"GO:0006828","manganese ion transport","1/304","15/18866",0.216327752947592,0.216327752947592,0.485880238197239,"TRPC1",1
GO:0007216,"GO:0007216","G protein-coupled glutamate receptor signaling pathway","1/304","15/18866",0.216327752947592,0.216327752947592,0.485880238197239,"GRM8",1
GO:0007638,"GO:0007638","mechanosensory behavior","1/304","15/18866",0.216327752947592,0.216327752947592,0.485880238197239,"STRBP",1
GO:0009209,"GO:0009209","pyrimidine ribonucleoside triphosphate biosynthetic process","1/304","15/18866",0.216327752947592,0.216327752947592,0.485880238197239,"NME9",1
GO:0010867,"GO:0010867","positive regulation of triglyceride biosynthetic process","1/304","15/18866",0.216327752947592,0.216327752947592,0.485880238197239,"LDLR",1
GO:0018216,"GO:0018216","peptidyl-arginine methylation","1/304","15/18866",0.216327752947592,0.216327752947592,0.485880238197239,"PRMT9",1
GO:0032328,"GO:0032328","alanine transport","1/304","15/18866",0.216327752947592,0.216327752947592,0.485880238197239,"SLC36A4",1
GO:0034638,"GO:0034638","phosphatidylcholine catabolic process","1/304","15/18866",0.216327752947592,0.216327752947592,0.485880238197239,"LDLR",1
GO:0036376,"GO:0036376","sodium ion export across plasma membrane","1/304","15/18866",0.216327752947592,0.216327752947592,0.485880238197239,"FXYD2",1
GO:0038065,"GO:0038065","collagen-activated signaling pathway","1/304","15/18866",0.216327752947592,0.216327752947592,0.485880238197239,"ITGA11",1
GO:0042362,"GO:0042362","fat-soluble vitamin biosynthetic process","1/304","15/18866",0.216327752947592,0.216327752947592,0.485880238197239,"PLTP",1
GO:0042559,"GO:0042559","pteridine-containing compound biosynthetic process","1/304","15/18866",0.216327752947592,0.216327752947592,0.485880238197239,"GCH1",1
GO:0043518,"GO:0043518","negative regulation of DNA damage response, signal transduction by p53 class mediator","1/304","15/18866",0.216327752947592,0.216327752947592,0.485880238197239,"PTTG1IP",1
GO:0045837,"GO:0045837","negative regulation of membrane potential","1/304","15/18866",0.216327752947592,0.216327752947592,0.485880238197239,"BNIP3",1
GO:0046479,"GO:0046479","glycosphingolipid catabolic process","1/304","15/18866",0.216327752947592,0.216327752947592,0.485880238197239,"GM2A",1
GO:0046606,"GO:0046606","negative regulation of centrosome cycle","1/304","15/18866",0.216327752947592,0.216327752947592,0.485880238197239,"KAT2B",1
GO:0048308,"GO:0048308","organelle inheritance","1/304","15/18866",0.216327752947592,0.216327752947592,0.485880238197239,"YWHAZ",1
GO:0048313,"GO:0048313","Golgi inheritance","1/304","15/18866",0.216327752947592,0.216327752947592,0.485880238197239,"YWHAZ",1
GO:0048712,"GO:0048712","negative regulation of astrocyte differentiation","1/304","15/18866",0.216327752947592,0.216327752947592,0.485880238197239,"LDLR",1
GO:0050651,"GO:0050651","dermatan sulfate proteoglycan biosynthetic process","1/304","15/18866",0.216327752947592,0.216327752947592,0.485880238197239,"VCAN",1
GO:0050746,"GO:0050746","regulation of lipoprotein metabolic process","1/304","15/18866",0.216327752947592,0.216327752947592,0.485880238197239,"DBI",1
GO:0051290,"GO:0051290","protein heterotetramerization","1/304","15/18866",0.216327752947592,0.216327752947592,0.485880238197239,"CPSF6",1
GO:0051589,"GO:0051589","negative regulation of neurotransmitter transport","1/304","15/18866",0.216327752947592,0.216327752947592,0.485880238197239,"PRKN",1
GO:0051608,"GO:0051608","histamine transport","1/304","15/18866",0.216327752947592,0.216327752947592,0.485880238197239,"EDN1",1
GO:0060134,"GO:0060134","prepulse inhibition","1/304","15/18866",0.216327752947592,0.216327752947592,0.485880238197239,"BACE1",1
GO:0060347,"GO:0060347","heart trabecula formation","1/304","15/18866",0.216327752947592,0.216327752947592,0.485880238197239,"HEY1",1
GO:0070365,"GO:0070365","hepatocyte differentiation","1/304","15/18866",0.216327752947592,0.216327752947592,0.485880238197239,"HNF4A",1
GO:0071474,"GO:0071474","cellular hyperosmotic response","1/304","15/18866",0.216327752947592,0.216327752947592,0.485880238197239,"YBX3",1
GO:0071501,"GO:0071501","cellular response to sterol depletion","1/304","15/18866",0.216327752947592,0.216327752947592,0.485880238197239,"INSIG1",1
GO:0072075,"GO:0072075","metanephric mesenchyme development","1/304","15/18866",0.216327752947592,0.216327752947592,0.485880238197239,"BMP7",1
GO:0090192,"GO:0090192","regulation of glomerulus development","1/304","15/18866",0.216327752947592,0.216327752947592,0.485880238197239,"BMP7",1
GO:0097202,"GO:0097202","activation of cysteine-type endopeptidase activity","1/304","15/18866",0.216327752947592,0.216327752947592,0.485880238197239,"RIPK2",1
GO:0099188,"GO:0099188","postsynaptic cytoskeleton organization","1/304","15/18866",0.216327752947592,0.216327752947592,0.485880238197239,"DBN1",1
GO:1902043,"GO:1902043","positive regulation of extrinsic apoptotic signaling pathway via death domain receptors","1/304","15/18866",0.216327752947592,0.216327752947592,0.485880238197239,"SKIL",1
GO:1903543,"GO:1903543","positive regulation of exosomal secretion","1/304","15/18866",0.216327752947592,0.216327752947592,0.485880238197239,"ATP13A2",1
GO:1904923,"GO:1904923","regulation of autophagy of mitochondrion in response to mitochondrial depolarization","1/304","15/18866",0.216327752947592,0.216327752947592,0.485880238197239,"PRKN",1
GO:2000095,"GO:2000095","regulation of Wnt signaling pathway, planar cell polarity pathway","1/304","15/18866",0.216327752947592,0.216327752947592,0.485880238197239,"ANKRD6",1
GO:2000402,"GO:2000402","negative regulation of lymphocyte migration","1/304","15/18866",0.216327752947592,0.216327752947592,0.485880238197239,"MIA3",1
GO:2001028,"GO:2001028","positive regulation of endothelial cell chemotaxis","1/304","15/18866",0.216327752947592,0.216327752947592,0.485880238197239,"SEMA5A",1
GO:0031644,"GO:0031644","regulation of nervous system process","4/304","148/18866",0.216537825117519,0.216537825117519,0.485880238197239,"EDN1/FABP5/RGS4/SHANK2",4
GO:0061337,"GO:0061337","cardiac conduction","4/304","148/18866",0.216537825117519,0.216537825117519,0.485880238197239,"CXADR/FXYD2/PKP2/TRPC1",4
GO:0009636,"GO:0009636","response to toxic substance","6/304","250/18866",0.217028111266656,0.217028111266656,0.486659989114564,"ASS1/BMP7/GCH1/PRKN/SCN9A/WDR35",6
GO:0008585,"GO:0008585","female gonad development","3/304","100/18866",0.21847275857199,0.21847275857199,0.488613615317104,"FOXO3/SLIT2/TIPARP",3
GO:0030219,"GO:0030219","megakaryocyte differentiation","3/304","100/18866",0.21847275857199,0.21847275857199,0.488613615317104,"KAT2B/KMT2E/MED1",3
GO:0045069,"GO:0045069","regulation of viral genome replication","3/304","100/18866",0.21847275857199,0.21847275857199,0.488613615317104,"PDE12/PRKN/TRIM6",3
GO:0046364,"GO:0046364","monosaccharide biosynthetic process","3/304","100/18866",0.21847275857199,0.21847275857199,0.488613615317104,"KAT2B/SLC25A13/SLC35B4",3
GO:0099504,"GO:0099504","synaptic vesicle cycle","5/304","199/18866",0.218635093110386,0.218635093110386,0.488656035541971,"BACE1/STON2/SYT12/UNC13A/VAMP1",5
GO:0043524,"GO:0043524","negative regulation of neuron apoptotic process","4/304","149/18866",0.219930584078954,0.219930584078954,0.49122937935273,"FYN/GCLC/JUN/PRKN",4
GO:0002720,"GO:0002720","positive regulation of cytokine production involved in immune response","2/304","55/18866",0.222072454096085,0.222072454096085,0.494243969040606,"FZD5/TRIM6",2
GO:0050433,"GO:0050433","regulation of catecholamine secretion","2/304","55/18866",0.222072454096085,0.222072454096085,0.494243969040606,"PRKN/SYT12",2
GO:0060350,"GO:0060350","endochondral bone morphogenesis","2/304","55/18866",0.222072454096085,0.222072454096085,0.494243969040606,"INPPL1/NAB2",2
GO:2000649,"GO:2000649","regulation of sodium ion transmembrane transporter activity","2/304","55/18866",0.222072454096085,0.222072454096085,0.494243969040606,"FXYD2/NETO2",2
GO:0010522,"GO:0010522","regulation of calcium ion transport into cytosol","3/304","101/18866",0.222695063177667,0.222695063177667,0.494243969040606,"ATG5/FYN/TRPC1",3
GO:0090263,"GO:0090263","positive regulation of canonical Wnt signaling pathway","4/304","150/18866",0.223337560019484,0.223337560019484,0.494243969040606,"CCAR2/GPC5/SEMA5A/SMURF2",4
GO:0030217,"GO:0030217","T cell differentiation","6/304","253/18866",0.224755617059603,0.224755617059603,0.494243969040606,"ATG5/CAMK4/FZD5/MAFB/RIPK2/SMAD7",6
GO:0070372,"GO:0070372","regulation of ERK1 and ERK2 cascade","7/304","306/18866",0.225213257073759,0.225213257073759,0.494243969040606,"BRAF/CAVIN3/FGFR4/FN1/JUN/RIPK2/YWHAZ",7
GO:0061041,"GO:0061041","regulation of wound healing","4/304","151/18866",0.226758340935999,0.226758340935999,0.494243969040606,"CD109/CLDN3/EDN1/FOXA2",4
GO:0043502,"GO:0043502","regulation of muscle adaptation","3/304","102/18866",0.226933570745301,0.226933570745301,0.494243969040606,"EDN1/FOXO3/RGS4",3
GO:0060840,"GO:0060840","artery development","3/304","102/18866",0.226933570745301,0.226933570745301,0.494243969040606,"HEY1/LDLR/SMAD7",3
GO:1903076,"GO:1903076","regulation of protein localization to plasma membrane","3/304","102/18866",0.226933570745301,0.226933570745301,0.494243969040606,"LYPLA1/PPP2R5A/SORBS1",3
GO:0031295,"GO:0031295","T cell costimulation","2/304","56/18866",0.228019731283822,0.228019731283822,0.494243969040606,"FYN/YES1",2
GO:0086065,"GO:0086065","cell communication involved in cardiac conduction","2/304","56/18866",0.228019731283822,0.228019731283822,0.494243969040606,"CXADR/PKP2",2
GO:1902017,"GO:1902017","regulation of cilium assembly","2/304","56/18866",0.228019731283822,0.228019731283822,0.494243969040606,"ATG5/ODF2L",2
GO:0002093,"GO:0002093","auditory receptor cell morphogenesis","1/304","16/18866",0.228965616355578,0.228965616355578,0.494243969040606,"WHRN",1
GO:0003222,"GO:0003222","ventricular trabecula myocardium morphogenesis","1/304","16/18866",0.228965616355578,0.228965616355578,0.494243969040606,"MED1",1
GO:0006206,"GO:0006206","pyrimidine nucleobase metabolic process","1/304","16/18866",0.228965616355578,0.228965616355578,0.494243969040606,"DPYD",1
GO:0006268,"GO:0006268","DNA unwinding involved in DNA replication","1/304","16/18866",0.228965616355578,0.228965616355578,0.494243969040606,"MCM7",1
GO:0007351,"GO:0007351","tripartite regional subdivision","1/304","16/18866",0.228965616355578,0.228965616355578,0.494243969040606,"FZD5",1
GO:0007379,"GO:0007379","segment specification","1/304","16/18866",0.228965616355578,0.228965616355578,0.494243969040606,"MAFB",1
GO:0007567,"GO:0007567","parturition","1/304","16/18866",0.228965616355578,0.228965616355578,0.494243969040606,"EDN1",1
GO:0008595,"GO:0008595","anterior/posterior axis specification, embryo","1/304","16/18866",0.228965616355578,0.228965616355578,0.494243969040606,"FZD5",1
GO:0009208,"GO:0009208","pyrimidine ribonucleoside triphosphate metabolic process","1/304","16/18866",0.228965616355578,0.228965616355578,0.494243969040606,"NME9",1
GO:0009263,"GO:0009263","deoxyribonucleotide biosynthetic process","1/304","16/18866",0.228965616355578,0.228965616355578,0.494243969040606,"TBPL1",1
GO:0010940,"GO:0010940","positive regulation of necrotic cell death","1/304","16/18866",0.228965616355578,0.228965616355578,0.494243969040606,"BNIP3",1
GO:0014744,"GO:0014744","positive regulation of muscle adaptation","1/304","16/18866",0.228965616355578,0.228965616355578,0.494243969040606,"FOXO3",1
GO:0019511,"GO:0019511","peptidyl-proline hydroxylation","1/304","16/18866",0.228965616355578,0.228965616355578,0.494243969040606,"ERO1A",1
GO:0032354,"GO:0032354","response to follicle-stimulating hormone","1/304","16/18866",0.228965616355578,0.228965616355578,0.494243969040606,"GCLC",1
GO:0034116,"GO:0034116","positive regulation of heterotypic cell-cell adhesion","1/304","16/18866",0.228965616355578,0.228965616355578,0.494243969040606,"BMP7",1
GO:0035067,"GO:0035067","negative regulation of histone acetylation","1/304","16/18866",0.228965616355578,0.228965616355578,0.494243969040606,"ATG5",1
GO:0043116,"GO:0043116","negative regulation of vascular permeability","1/304","16/18866",0.228965616355578,0.228965616355578,0.494243969040606,"SLIT2",1
GO:0045116,"GO:0045116","protein neddylation","1/304","16/18866",0.228965616355578,0.228965616355578,0.494243969040606,"DCUN1D5",1
GO:0046500,"GO:0046500","S-adenosylmethionine metabolic process","1/304","16/18866",0.228965616355578,0.228965616355578,0.494243969040606,"MAT2B",1
GO:0046831,"GO:0046831","regulation of RNA export from nucleus","1/304","16/18866",0.228965616355578,0.228965616355578,0.494243969040606,"CPSF6",1
GO:0048172,"GO:0048172","regulation of short-term neuronal synaptic plasticity","1/304","16/18866",0.228965616355578,0.228965616355578,0.494243969040606,"UNC13A",1
GO:0050655,"GO:0050655","dermatan sulfate proteoglycan metabolic process","1/304","16/18866",0.228965616355578,0.228965616355578,0.494243969040606,"VCAN",1
GO:0050884,"GO:0050884","neuromuscular process controlling posture","1/304","16/18866",0.228965616355578,0.228965616355578,0.494243969040606,"GCH1",1
GO:0051444,"GO:0051444","negative regulation of ubiquitin-protein transferase activity","1/304","16/18866",0.228965616355578,0.228965616355578,0.494243969040606,"SMAD7",1
GO:0060572,"GO:0060572","morphogenesis of an epithelial bud","1/304","16/18866",0.228965616355578,0.228965616355578,0.494243969040606,"BMP7",1
GO:0060628,"GO:0060628","regulation of ER to Golgi vesicle-mediated transport","1/304","16/18866",0.228965616355578,0.228965616355578,0.494243969040606,"INSIG1",1
GO:0061450,"GO:0061450","trophoblast cell migration","1/304","16/18866",0.228965616355578,0.228965616355578,0.494243969040606,"SMURF2",1
GO:0061548,"GO:0061548","ganglion development","1/304","16/18866",0.228965616355578,0.228965616355578,0.494243969040606,"RGS4",1
GO:0061684,"GO:0061684","chaperone-mediated autophagy","1/304","16/18866",0.228965616355578,0.228965616355578,0.494243969040606,"ATP13A2",1
GO:0072109,"GO:0072109","glomerular mesangium development","1/304","16/18866",0.228965616355578,0.228965616355578,0.494243969040606,"BMP7",1
GO:0090069,"GO:0090069","regulation of ribosome biogenesis","1/304","16/18866",0.228965616355578,0.228965616355578,0.494243969040606,"KAT2B",1
GO:0099170,"GO:0099170","postsynaptic modulation of chemical synaptic transmission","1/304","16/18866",0.228965616355578,0.228965616355578,0.494243969040606,"NRGN",1
GO:1900451,"GO:1900451","positive regulation of glutamate receptor signaling pathway","1/304","16/18866",0.228965616355578,0.228965616355578,0.494243969040606,"UNC13A",1
GO:1901163,"GO:1901163","regulation of trophoblast cell migration","1/304","16/18866",0.228965616355578,0.228965616355578,0.494243969040606,"SMURF2",1
GO:1903358,"GO:1903358","regulation of Golgi organization","1/304","16/18866",0.228965616355578,0.228965616355578,0.494243969040606,"RAB33B",1
GO:1904294,"GO:1904294","positive regulation of ERAD pathway","1/304","16/18866",0.228965616355578,0.228965616355578,0.494243969040606,"USP13",1
GO:1905050,"GO:1905050","positive regulation of metallopeptidase activity","1/304","16/18866",0.228965616355578,0.228965616355578,0.494243969040606,"CLDN3",1
GO:2001212,"GO:2001212","regulation of vasculogenesis","1/304","16/18866",0.228965616355578,0.228965616355578,0.494243969040606,"HEY1",1
GO:0009259,"GO:0009259","ribonucleotide metabolic process","9/304","416/18866",0.229970714323543,0.229970714323543,0.496099382398156,"ADCY7/BPGM/DBI/ELOVL7/HACD1/NME9/PDK4/PDP1/SLC25A13",9
GO:0006090,"GO:0006090","pyruvate metabolic process","4/304","152/18866",0.230192515635877,0.230192515635877,0.496263767521536,"BPGM/PDK4/PDP1/SLC16A3",4
GO:0030593,"GO:0030593","neutrophil chemotaxis","3/304","103/18866",0.23118749722823,0.23118749722823,0.497436662286219,"CXADR/EDN1/SLIT2",3
GO:0034766,"GO:0034766","negative regulation of ion transmembrane transport","3/304","103/18866",0.23118749722823,0.23118749722823,0.497436662286219,"IRS2/RGS4/SLC43A1",3
GO:0072521,"GO:0072521","purine-containing compound metabolic process","10/304","472/18866",0.232363009686038,0.232363009686038,0.497436662286219,"ADCY7/BPGM/DBI/DPYD/ELOVL7/HACD1/NME9/PDK4/PDP1/SLC25A13",10
GO:1903708,"GO:1903708","positive regulation of hemopoiesis","5/304","204/18866",0.233288103194805,0.233288103194805,0.497436662286219,"CREB1/FOXO3/JUN/MED1/RIPK2",5
GO:0030520,"GO:0030520","intracellular estrogen receptor signaling pathway","2/304","57/18866",0.233977919430045,0.233977919430045,0.497436662286219,"LBH/MED1",2
GO:0046148,"GO:0046148","pigment biosynthetic process","2/304","57/18866",0.233977919430045,0.233977919430045,0.497436662286219,"PPOX/TRPC1",2
GO:0050432,"GO:0050432","catecholamine secretion","2/304","57/18866",0.233977919430045,0.233977919430045,0.497436662286219,"PRKN/SYT12",2
GO:0070534,"GO:0070534","protein K63-linked ubiquitination","2/304","57/18866",0.233977919430045,0.233977919430045,0.497436662286219,"PRKN/UBE2O",2
GO:0098900,"GO:0098900","regulation of action potential","2/304","57/18866",0.233977919430045,0.233977919430045,0.497436662286219,"CXADR/PKP2",2
GO:0018105,"GO:0018105","peptidyl-serine phosphorylation","7/304","310/18866",0.234669377736106,0.234669377736106,0.497436662286219,"BRAF/CAMK4/PLCL1/RIPK2/SH2D3A/SMAD7/TRIM6",7
GO:0044843,"GO:0044843","cell cycle G1/S phase transition","7/304","310/18866",0.234669377736106,0.234669377736106,0.497436662286219,"BACH1/CCNE2/CCNH/GLI1/KMT2E/MCM7/POLE4",7
GO:0007159,"GO:0007159","leukocyte cell-cell adhesion","8/304","364/18866",0.23493068457023,0.23493068457023,0.497436662286219,"ASS1/BMP7/FYN/MIA3/PODXL2/RIPK2/SMAD7/YES1",8
GO:0002367,"GO:0002367","cytokine production involved in immune response","3/304","104/18866",0.235456066159693,0.235456066159693,0.497436662286219,"FZD5/SMAD7/TRIM6",3
GO:0048525,"GO:0048525","negative regulation of viral process","3/304","104/18866",0.235456066159693,0.235456066159693,0.497436662286219,"JUN/PRKN/TRIM6",3
GO:0010977,"GO:0010977","negative regulation of neuron projection development","4/304","154/18866",0.237099406386421,0.237099406386421,0.497436662286219,"EPHA4/SEMA5A/SLIT2/SPP1",4
GO:0014065,"GO:0014065","phosphatidylinositol 3-kinase signaling","4/304","154/18866",0.237099406386421,0.237099406386421,0.497436662286219,"EDN1/FYN/IRS2/PIK3AP1",4
GO:0062013,"GO:0062013","positive regulation of small molecule metabolic process","4/304","154/18866",0.237099406386421,0.237099406386421,0.497436662286219,"IRS2/KAT2B/SORBS1/STARD4",4
GO:0006415,"GO:0006415","translational termination","3/304","105/18866",0.239738508825694,0.239738508825694,0.497436662286219,"MRPL19/MRPL50/MRPS7",3
GO:0021549,"GO:0021549","cerebellum development","3/304","105/18866",0.239738508825694,0.239738508825694,0.497436662286219,"AGTPBP1/GLI1/WHRN",3
GO:0030301,"GO:0030301","cholesterol transport","3/304","105/18866",0.239738508825694,0.239738508825694,0.497436662286219,"LDLR/PLTP/STARD4",3
GO:0031532,"GO:0031532","actin cytoskeleton reorganization","3/304","105/18866",0.239738508825694,0.239738508825694,0.497436662286219,"CLDN3/CXADR/PDLIM4",3
GO:0046545,"GO:0046545","development of primary female sexual characteristics","3/304","105/18866",0.239738508825694,0.239738508825694,0.497436662286219,"FOXO3/SLIT2/TIPARP",3
GO:0097006,"GO:0097006","regulation of plasma lipoprotein particle levels","3/304","105/18866",0.239738508825694,0.239738508825694,0.497436662286219,"LDLR/LIPA/PLTP",3
GO:1902106,"GO:1902106","negative regulation of leukocyte differentiation","3/304","105/18866",0.239738508825694,0.239738508825694,0.497436662286219,"FBN1/MAFB/SMAD7",3
GO:2001022,"GO:2001022","positive regulation of response to DNA damage stimulus","3/304","105/18866",0.239738508825694,0.239738508825694,0.497436662286219,"CCAR2/FANCB/SKIL",3
GO:0000768,"GO:0000768","syncytium formation by plasma membrane fusion","2/304","58/18866",0.239945129957359,0.239945129957359,0.497436662286219,"CD109/MYOF",2
GO:0002011,"GO:0002011","morphogenesis of an epithelial sheet","2/304","58/18866",0.239945129957359,0.239945129957359,0.497436662286219,"BMP7/CD151",2
GO:0002763,"GO:0002763","positive regulation of myeloid leukocyte differentiation","2/304","58/18866",0.239945129957359,0.239945129957359,0.497436662286219,"CREB1/JUN",2
GO:0010656,"GO:0010656","negative regulation of muscle cell apoptotic process","2/304","58/18866",0.239945129957359,0.239945129957359,0.497436662286219,"BMP7/EDN1",2
GO:0010662,"GO:0010662","regulation of striated muscle cell apoptotic process","2/304","58/18866",0.239945129957359,0.239945129957359,0.497436662286219,"BMP7/BNIP3",2
GO:0030042,"GO:0030042","actin filament depolymerization","2/304","58/18866",0.239945129957359,0.239945129957359,0.497436662286219,"PLEKHH2/SEMA5A",2
GO:0031294,"GO:0031294","lymphocyte costimulation","2/304","58/18866",0.239945129957359,0.239945129957359,0.497436662286219,"FYN/YES1",2
GO:0140253,"GO:0140253","cell-cell fusion","2/304","58/18866",0.239945129957359,0.239945129957359,0.497436662286219,"CD109/MYOF",2
GO:1900408,"GO:1900408","negative regulation of cellular response to oxidative stress","2/304","58/18866",0.239945129957359,0.239945129957359,0.497436662286219,"FYN/PRKN",2
GO:1903202,"GO:1903202","negative regulation of oxidative stress-induced cell death","2/304","58/18866",0.239945129957359,0.239945129957359,0.497436662286219,"FYN/PRKN",2
GO:1903793,"GO:1903793","positive regulation of anion transport","2/304","58/18866",0.239945129957359,0.239945129957359,0.497436662286219,"DBI/EDN1",2
GO:0050773,"GO:0050773","regulation of dendrite development","4/304","155/18866",0.240571305171579,0.240571305171579,0.497436662286219,"BMP7/DBN1/EPHA4/SHANK2",4
GO:0006474,"GO:0006474","N-terminal protein amino acid acetylation","1/304","17/18866",0.241400335327881,0.241400335327881,0.497436662286219,"KAT2B",1
GO:0006577,"GO:0006577","amino-acid betaine metabolic process","1/304","17/18866",0.241400335327881,0.241400335327881,0.497436662286219,"SLC22A4",1
GO:0006750,"GO:0006750","glutathione biosynthetic process","1/304","17/18866",0.241400335327881,0.241400335327881,0.497436662286219,"GCLC",1
GO:0006991,"GO:0006991","response to sterol depletion","1/304","17/18866",0.241400335327881,0.241400335327881,0.497436662286219,"INSIG1",1
GO:0009299,"GO:0009299","mRNA transcription","1/304","17/18866",0.241400335327881,0.241400335327881,0.497436662286219,"MED1",1
GO:0010715,"GO:0010715","regulation of extracellular matrix disassembly","1/304","17/18866",0.241400335327881,0.241400335327881,0.497436662286219,"FGFR4",1
GO:0015732,"GO:0015732","prostaglandin transport","1/304","17/18866",0.241400335327881,0.241400335327881,0.497436662286219,"EDN1",1
GO:0016254,"GO:0016254","preassembly of GPI anchor in ER membrane","1/304","17/18866",0.241400335327881,0.241400335327881,0.497436662286219,"PIGM",1
GO:0019377,"GO:0019377","glycolipid catabolic process","1/304","17/18866",0.241400335327881,0.241400335327881,0.497436662286219,"GM2A",1
GO:0030299,"GO:0030299","intestinal cholesterol absorption","1/304","17/18866",0.241400335327881,0.241400335327881,0.497436662286219,"LDLR",1
GO:0032305,"GO:0032305","positive regulation of icosanoid secretion","1/304","17/18866",0.241400335327881,0.241400335327881,0.497436662286219,"EDN1",1
GO:0034384,"GO:0034384","high-density lipoprotein particle clearance","1/304","17/18866",0.241400335327881,0.241400335327881,0.497436662286219,"LDLR",1
GO:0035020,"GO:0035020","regulation of Rac protein signal transduction","1/304","17/18866",0.241400335327881,0.241400335327881,0.497436662286219,"SSX2IP",1
GO:0035855,"GO:0035855","megakaryocyte development","1/304","17/18866",0.241400335327881,0.241400335327881,0.497436662286219,"MED1",1
GO:0042753,"GO:0042753","positive regulation of circadian rhythm","1/304","17/18866",0.241400335327881,0.241400335327881,0.497436662286219,"FBXW11",1
GO:0042953,"GO:0042953","lipoprotein transport","1/304","17/18866",0.241400335327881,0.241400335327881,0.497436662286219,"MIA3",1
GO:0043923,"GO:0043923","positive regulation by host of viral transcription","1/304","17/18866",0.241400335327881,0.241400335327881,0.497436662286219,"JUN",1
GO:0043968,"GO:0043968","histone H2A acetylation","1/304","17/18866",0.241400335327881,0.241400335327881,0.497436662286219,"ACTL6A",1
GO:0044539,"GO:0044539","long-chain fatty acid import into cell","1/304","17/18866",0.241400335327881,0.241400335327881,0.497436662286219,"IRS2",1
GO:0045623,"GO:0045623","negative regulation of T-helper cell differentiation","1/304","17/18866",0.241400335327881,0.241400335327881,0.497436662286219,"SMAD7",1
GO:0045722,"GO:0045722","positive regulation of gluconeogenesis","1/304","17/18866",0.241400335327881,0.241400335327881,0.497436662286219,"KAT2B",1
GO:0050665,"GO:0050665","hydrogen peroxide biosynthetic process","1/304","17/18866",0.241400335327881,0.241400335327881,0.497436662286219,"FYN",1
GO:0051580,"GO:0051580","regulation of neurotransmitter uptake","1/304","17/18866",0.241400335327881,0.241400335327881,0.497436662286219,"PRKN",1
GO:0055012,"GO:0055012","ventricular cardiac muscle cell differentiation","1/304","17/18866",0.241400335327881,0.241400335327881,0.497436662286219,"ATG5",1
GO:0060644,"GO:0060644","mammary gland epithelial cell differentiation","1/304","17/18866",0.241400335327881,0.241400335327881,0.497436662286219,"LBH",1
GO:0070131,"GO:0070131","positive regulation of mitochondrial translation","1/304","17/18866",0.241400335327881,0.241400335327881,0.497436662286219,"RPUSD4",1
GO:0090185,"GO:0090185","negative regulation of kidney development","1/304","17/18866",0.241400335327881,0.241400335327881,0.497436662286219,"BMP7",1
GO:0090336,"GO:0090336","positive regulation of brown fat cell differentiation","1/304","17/18866",0.241400335327881,0.241400335327881,0.497436662286219,"BMP7",1
GO:0090494,"GO:0090494","dopamine uptake","1/304","17/18866",0.241400335327881,0.241400335327881,0.497436662286219,"PRKN",1
GO:0097094,"GO:0097094","craniofacial suture morphogenesis","1/304","17/18866",0.241400335327881,0.241400335327881,0.497436662286219,"INSIG1",1
GO:0140354,"GO:0140354","lipid import into cell","1/304","17/18866",0.241400335327881,0.241400335327881,0.497436662286219,"IRS2",1
GO:1900363,"GO:1900363","regulation of mRNA polyadenylation","1/304","17/18866",0.241400335327881,0.241400335327881,0.497436662286219,"CPSF6",1
GO:1903209,"GO:1903209","positive regulation of oxidative stress-induced cell death","1/304","17/18866",0.241400335327881,0.241400335327881,0.497436662286219,"FOXO3",1
GO:1905331,"GO:1905331","negative regulation of morphogenesis of an epithelium","1/304","17/18866",0.241400335327881,0.241400335327881,0.497436662286219,"BMP7",1
GO:2000001,"GO:2000001","regulation of DNA damage checkpoint","1/304","17/18866",0.241400335327881,0.241400335327881,0.497436662286219,"CCAR2",1
GO:2000811,"GO:2000811","negative regulation of anoikis","1/304","17/18866",0.241400335327881,0.241400335327881,0.497436662286219,"PDK4",1
GO:0051098,"GO:0051098","regulation of binding","8/304","367/18866",0.241536378097439,0.241536378097439,0.497436662286219,"ARHGAP28/EPHA4/HEY1/JUN/PLCL1/PRKN/RIPK2/TRIM6",8
GO:0008544,"GO:0008544","epidermis development","10/304","477/18866",0.241967398429716,0.241967398429716,0.498023414769527,"CD109/EDAR/EMP1/FABP5/GLI1/MED1/NAB2/PKP2/POU3F2/WHRN",10
GO:0006493,"GO:0006493","protein O-linked glycosylation","3/304","106/18866",0.244034064426995,0.244034064426995,0.501411739221729,"B4GAT1/EOGT/ST3GAL1",3
GO:2000379,"GO:2000379","positive regulation of reactive oxygen species metabolic process","3/304","106/18866",0.244034064426995,0.244034064426995,0.501411739221729,"ASS1/EDN1/FOXO3",3
GO:0003341,"GO:0003341","cilium movement","4/304","156/18866",0.244054963434344,0.244054963434344,0.501411739221729,"DNAH9/PLTP/RSPH4A/SPA17",4
GO:0015931,"GO:0015931","nucleobase-containing compound transport","6/304","261/18866",0.245785250327374,0.245785250327374,0.50151538435832,"CETN2/CPSF6/MYO1C/QKI/SLC25A13/SLC35B4",6
GO:0043486,"GO:0043486","histone exchange","2/304","59/18866",0.245919531933629,0.245919531933629,0.50151538435832,"ACTR6/CENPI",2
GO:0046456,"GO:0046456","icosanoid biosynthetic process","2/304","59/18866",0.245919531933629,0.245919531933629,0.50151538435832,"EDN1/FABP5",2
GO:0046605,"GO:0046605","regulation of centrosome cycle","2/304","59/18866",0.245919531933629,0.245919531933629,0.50151538435832,"KAT2B/PLK4",2
GO:0048008,"GO:0048008","platelet-derived growth factor receptor signaling pathway","2/304","59/18866",0.245919531933629,0.245919531933629,0.50151538435832,"PHF14/TIPARP",2
GO:0051058,"GO:0051058","negative regulation of small GTPase mediated signal transduction","2/304","59/18866",0.245919531933629,0.245919531933629,0.50151538435832,"RASA2/SLIT2",2
GO:0060043,"GO:0060043","regulation of cardiac muscle cell proliferation","2/304","59/18866",0.245919531933629,0.245919531933629,0.50151538435832,"CXADR/GLI1",2
GO:0030148,"GO:0030148","sphingolipid biosynthetic process","3/304","107/18866",0.248341980230622,0.248341980230622,0.50151538435832,"ACER3/ELOVL7/HACD1",3
GO:0035601,"GO:0035601","protein deacylation","3/304","107/18866",0.248341980230622,0.248341980230622,0.50151538435832,"CCAR2/LYPLA1/LYPLAL1",3
GO:0043266,"GO:0043266","regulation of potassium ion transport","3/304","107/18866",0.248341980230622,0.248341980230622,0.50151538435832,"KCNS1/NETO2/RGS4",3
GO:0099175,"GO:0099175","regulation of postsynapse organization","3/304","107/18866",0.248341980230622,0.248341980230622,0.50151538435832,"DBN1/EPHA4/FYN",3
GO:0030168,"GO:0030168","platelet activation","4/304","158/18866",0.251055938290938,0.251055938290938,0.50151538435832,"F8/FN1/FYN/YWHAZ",4
GO:0060402,"GO:0060402","calcium ion transport into cytosol","4/304","158/18866",0.251055938290938,0.251055938290938,0.50151538435832,"ATG5/ERO1A/FYN/TRPC1",4
GO:0006949,"GO:0006949","syncytium formation","2/304","60/18866",0.251899350715046,0.251899350715046,0.50151538435832,"CD109/MYOF",2
GO:0018208,"GO:0018208","peptidyl-proline modification","2/304","60/18866",0.251899350715046,0.251899350715046,0.50151538435832,"ERO1A/PPIC",2
GO:0019229,"GO:0019229","regulation of vasoconstriction","2/304","60/18866",0.251899350715046,0.251899350715046,0.50151538435832,"EDN1/KCNMB4",2
GO:0032732,"GO:0032732","positive regulation of interleukin-1 production","2/304","60/18866",0.251899350715046,0.251899350715046,0.50151538435832,"FZD5/RIPK2",2
GO:0033260,"GO:0033260","nuclear DNA replication","2/304","60/18866",0.251899350715046,0.251899350715046,0.50151538435832,"MCM7/POLE4",2
GO:0042093,"GO:0042093","T-helper cell differentiation","2/304","60/18866",0.251899350715046,0.251899350715046,0.50151538435832,"RIPK2/SMAD7",2
GO:0043388,"GO:0043388","positive regulation of DNA binding","2/304","60/18866",0.251899350715046,0.251899350715046,0.50151538435832,"PRKN/TRIM6",2
GO:0043966,"GO:0043966","histone H3 acetylation","2/304","60/18866",0.251899350715046,0.251899350715046,0.50151538435832,"KAT2B/PHF14",2
GO:0048747,"GO:0048747","muscle fiber development","2/304","60/18866",0.251899350715046,0.251899350715046,0.50151538435832,"CXADR/MYOF",2
GO:0050994,"GO:0050994","regulation of lipid catabolic process","2/304","60/18866",0.251899350715046,0.251899350715046,0.50151538435832,"IRS2/LDLR",2
GO:0051784,"GO:0051784","negative regulation of nuclear division","2/304","60/18866",0.251899350715046,0.251899350715046,0.50151538435832,"BMP7/DYNC1LI1",2
GO:0061098,"GO:0061098","positive regulation of protein tyrosine kinase activity","2/304","60/18866",0.251899350715046,0.251899350715046,0.50151538435832,"EPHA4/FYN",2
GO:0061900,"GO:0061900","glial cell activation","2/304","60/18866",0.251899350715046,0.251899350715046,0.50151538435832,"JUN/LDLR",2
GO:0097755,"GO:0097755","positive regulation of blood vessel diameter","2/304","60/18866",0.251899350715046,0.251899350715046,0.50151538435832,"ATG5/GCH1",2
GO:1902808,"GO:1902808","positive regulation of cell cycle G1/S phase transition","2/304","60/18866",0.251899350715046,0.251899350715046,0.50151538435832,"GLI1/KMT2E",2
GO:1902883,"GO:1902883","negative regulation of response to oxidative stress","2/304","60/18866",0.251899350715046,0.251899350715046,0.50151538435832,"FYN/PRKN",2
GO:0019693,"GO:0019693","ribose phosphate metabolic process","9/304","427/18866",0.252611220337271,0.252611220337271,0.50151538435832,"ADCY7/BPGM/DBI/ELOVL7/HACD1/NME9/PDK4/PDP1/SLC25A13",9
GO:0060071,"GO:0060071","Wnt signaling pathway, planar cell polarity pathway","3/304","108/18866",0.252661511711211,0.252661511711211,0.50151538435832,"ANKRD6/FZD5/SMURF2",3
GO:0001522,"GO:0001522","pseudouridine synthesis","1/304","18/18866",0.253635164658897,0.253635164658897,0.50151538435832,"RPUSD4",1
GO:0001675,"GO:0001675","acrosome assembly","1/304","18/18866",0.253635164658897,0.253635164658897,0.50151538435832,"TBPL1",1
GO:0006337,"GO:0006337","nucleosome disassembly","1/304","18/18866",0.253635164658897,0.253635164658897,0.50151538435832,"SMARCD1",1
GO:0006744,"GO:0006744","ubiquinone biosynthetic process","1/304","18/18866",0.253635164658897,0.253635164658897,0.50151538435832,"COQ10B",1
GO:0007221,"GO:0007221","positive regulation of transcription of Notch receptor target","1/304","18/18866",0.253635164658897,0.253635164658897,0.50151538435832,"KAT2B",1
GO:0007597,"GO:0007597","blood coagulation, intrinsic pathway","1/304","18/18866",0.253635164658897,0.253635164658897,0.50151538435832,"F8",1
GO:0009200,"GO:0009200","deoxyribonucleoside triphosphate metabolic process","1/304","18/18866",0.253635164658897,0.253635164658897,0.50151538435832,"TBPL1",1
GO:0021756,"GO:0021756","striatum development","1/304","18/18866",0.253635164658897,0.253635164658897,0.50151538435832,"ZSWIM6",1
GO:0034199,"GO:0034199","activation of protein kinase A activity","1/304","18/18866",0.253635164658897,0.253635164658897,0.50151538435832,"ADCY7",1
GO:0034375,"GO:0034375","high-density lipoprotein particle remodeling","1/304","18/18866",0.253635164658897,0.253635164658897,0.50151538435832,"PLTP",1
GO:0034433,"GO:0034433","steroid esterification","1/304","18/18866",0.253635164658897,0.253635164658897,0.50151538435832,"STARD4",1
GO:0034434,"GO:0034434","sterol esterification","1/304","18/18866",0.253635164658897,0.253635164658897,0.50151538435832,"STARD4",1
GO:0034435,"GO:0034435","cholesterol esterification","1/304","18/18866",0.253635164658897,0.253635164658897,0.50151538435832,"STARD4",1
GO:0034755,"GO:0034755","iron ion transmembrane transport","1/304","18/18866",0.253635164658897,0.253635164658897,0.50151538435832,"SLC40A1",1
GO:0036035,"GO:0036035","osteoclast development","1/304","18/18866",0.253635164658897,0.253635164658897,0.50151538435832,"FBN1",1
GO:0036149,"GO:0036149","phosphatidylinositol acyl-chain remodeling","1/304","18/18866",0.253635164658897,0.253635164658897,0.50151538435832,"PLBD1",1
GO:0042136,"GO:0042136","neurotransmitter biosynthetic process","1/304","18/18866",0.253635164658897,0.253635164658897,0.50151538435832,"MOXD1",1
GO:0043011,"GO:0043011","myeloid dendritic cell differentiation","1/304","18/18866",0.253635164658897,0.253635164658897,0.50151538435832,"CAMK4",1
GO:0043031,"GO:0043031","negative regulation of macrophage activation","1/304","18/18866",0.253635164658897,0.253635164658897,0.50151538435832,"LDLR",1
GO:0044827,"GO:0044827","modulation by host of viral genome replication","1/304","18/18866",0.253635164658897,0.253635164658897,0.50151538435832,"PRKN",1
GO:0044872,"GO:0044872","lipoprotein localization","1/304","18/18866",0.253635164658897,0.253635164658897,0.50151538435832,"MIA3",1
GO:0051571,"GO:0051571","positive regulation of histone H3-K4 methylation","1/304","18/18866",0.253635164658897,0.253635164658897,0.50151538435832,"KMT2E",1
GO:0060033,"GO:0060033","anatomical structure regression","1/304","18/18866",0.253635164658897,0.253635164658897,0.50151538435832,"GLI1",1
GO:0071371,"GO:0071371","cellular response to gonadotropin stimulus","1/304","18/18866",0.253635164658897,0.253635164658897,0.50151538435832,"GCLC",1
GO:0071786,"GO:0071786","endoplasmic reticulum tubular network organization","1/304","18/18866",0.253635164658897,0.253635164658897,0.50151538435832,"ATL3",1
GO:0090036,"GO:0090036","regulation of protein kinase C signaling","1/304","18/18866",0.253635164658897,0.253635164658897,0.50151538435832,"ULK4",1
GO:0090493,"GO:0090493","catecholamine uptake","1/304","18/18866",0.253635164658897,0.253635164658897,0.50151538435832,"PRKN",1
GO:0097107,"GO:0097107","postsynaptic density assembly","1/304","18/18866",0.253635164658897,0.253635164658897,0.50151538435832,"SHANK2",1
GO:1901524,"GO:1901524","regulation of mitophagy","1/304","18/18866",0.253635164658897,0.253635164658897,0.50151538435832,"PRKN",1
GO:1901663,"GO:1901663","quinone biosynthetic process","1/304","18/18866",0.253635164658897,0.253635164658897,0.50151538435832,"COQ10B",1
GO:1902074,"GO:1902074","response to salt","1/304","18/18866",0.253635164658897,0.253635164658897,0.50151538435832,"EDN1",1
GO:1902683,"GO:1902683","regulation of receptor localization to synapse","1/304","18/18866",0.253635164658897,0.253635164658897,0.50151538435832,"DBN1",1
GO:1990000,"GO:1990000","amyloid fibril formation","1/304","18/18866",0.253635164658897,0.253635164658897,0.50151538435832,"LDLR",1
GO:0042110,"GO:0042110","T cell activation","10/304","483/18866",0.25367914558946,0.25367914558946,0.50151538435832,"ATG5/CAMK4/CD151/CXADR/FYN/FZD5/MAFB/RIPK2/SMAD7/YES1",10
GO:0048863,"GO:0048863","stem cell differentiation","6/304","264/18866",0.253816657231994,0.253816657231994,0.50151538435832,"BMP7/EDN1/FN1/LBH/SEMA5A/TRIM6",6
GO:0016573,"GO:0016573","histone acetylation","4/304","159/18866",0.254572448652292,0.254572448652292,0.502717319470709,"ACTL6A/ATG5/KAT2B/PHF14",4
GO:0007568,"GO:0007568","aging","7/304","319/18866",0.256408055646794,0.256408055646794,0.506048995327657,"ASS1/CREB1/EDN1/ERO1A/FOXO3/GCLC/JUN",7
GO:0006643,"GO:0006643","membrane lipid metabolic process","5/304","212/18866",0.257281430544845,0.257281430544845,0.506321078164072,"ACER3/ELOVL7/GM2A/HACD1/PIGM",5
GO:0003170,"GO:0003170","heart valve development","2/304","61/18866",0.257882866617723,0.257882866617723,0.506321078164072,"HEY1/SLIT2",2
GO:0006027,"GO:0006027","glycosaminoglycan catabolic process","2/304","61/18866",0.257882866617723,0.257882866617723,0.506321078164072,"GPC5/VCAN",2
GO:0010658,"GO:0010658","striated muscle cell apoptotic process","2/304","61/18866",0.257882866617723,0.257882866617723,0.506321078164072,"BMP7/BNIP3",2
GO:0021872,"GO:0021872","forebrain generation of neurons","2/304","61/18866",0.257882866617723,0.257882866617723,0.506321078164072,"SLIT2/ZSWIM6",2
GO:0045071,"GO:0045071","negative regulation of viral genome replication","2/304","61/18866",0.257882866617723,0.257882866617723,0.506321078164072,"PRKN/TRIM6",2
GO:0046324,"GO:0046324","regulation of glucose import","2/304","61/18866",0.257882866617723,0.257882866617723,0.506321078164072,"IRS2/SORBS1",2
GO:0046888,"GO:0046888","negative regulation of hormone secretion","2/304","61/18866",0.257882866617723,0.257882866617723,0.506321078164072,"EDN1/PRKN",2
GO:0061512,"GO:0061512","protein localization to cilium","2/304","61/18866",0.257882866617723,0.257882866617723,0.506321078164072,"DZIP1L/WDR35",2
GO:0007286,"GO:0007286","spermatid development","4/304","160/18866",0.258099106227755,0.258099106227755,0.50645390174558,"CEP57/QKI/STRBP/TBPL1",4
GO:0006289,"GO:0006289","nucleotide-excision repair","3/304","110/18866",0.261332485419576,0.261332485419576,0.50731527214366,"CCNH/CETN2/TCEA1",3
GO:0007041,"GO:0007041","lysosomal transport","3/304","110/18866",0.261332485419576,0.261332485419576,0.50731527214366,"ATP13A2/M6PR/PRKN",3
GO:0009141,"GO:0009141","nucleoside triphosphate metabolic process","3/304","110/18866",0.261332485419576,0.261332485419576,0.50731527214366,"NME9/SLC25A13/TBPL1",3
GO:0090100,"GO:0090100","positive regulation of transmembrane receptor protein serine/threonine kinase signaling pathway","3/304","110/18866",0.261332485419576,0.261332485419576,0.50731527214366,"BMP7/TGFB1I1/UBE2O",3
GO:0090175,"GO:0090175","regulation of establishment of planar polarity","3/304","110/18866",0.261332485419576,0.261332485419576,0.50731527214366,"ANKRD6/FZD5/SMURF2",3
GO:0002260,"GO:0002260","lymphocyte homeostasis","2/304","62/18866",0.263868413617264,0.263868413617264,0.50731527214366,"SKIL/SLC40A1",2
GO:0002294,"GO:0002294","CD4-positive, alpha-beta T cell differentiation involved in immune response","2/304","62/18866",0.263868413617264,0.263868413617264,0.50731527214366,"RIPK2/SMAD7",2
GO:0051851,"GO:0051851","modulation by host of symbiont process","2/304","62/18866",0.263868413617264,0.263868413617264,0.50731527214366,"JUN/PRKN",2
GO:0060393,"GO:0060393","regulation of pathway-restricted SMAD protein phosphorylation","2/304","62/18866",0.263868413617264,0.263868413617264,0.50731527214366,"BMP7/SMAD7",2
GO:2000351,"GO:2000351","regulation of endothelial cell apoptotic process","2/304","62/18866",0.263868413617264,0.263868413617264,0.50731527214366,"FOXO3/SEMA5A",2
GO:0050808,"GO:0050808","synapse organization","9/304","433/18866",0.265264307170335,0.265264307170335,0.50731527214366,"DBN1/EPHA4/FYN/FZD5/PCDHGC3/PICK1/SHANK2/UNC13A/YWHAZ",9
GO:0002710,"GO:0002710","negative regulation of T cell mediated immunity","1/304","19/18866",0.265673307164399,0.265673307164399,0.50731527214366,"SMAD7",1
GO:0006044,"GO:0006044","N-acetylglucosamine metabolic process","1/304","19/18866",0.265673307164399,0.265673307164399,0.50731527214366,"CHST6",1
GO:0006271,"GO:0006271","DNA strand elongation involved in DNA replication","1/304","19/18866",0.265673307164399,0.265673307164399,0.50731527214366,"MCM7",1
GO:0006670,"GO:0006670","sphingosine metabolic process","1/304","19/18866",0.265673307164399,0.265673307164399,0.50731527214366,"ACER3",1
GO:0009219,"GO:0009219","pyrimidine deoxyribonucleotide metabolic process","1/304","19/18866",0.265673307164399,0.265673307164399,0.50731527214366,"TBPL1",1
GO:0010663,"GO:0010663","positive regulation of striated muscle cell apoptotic process","1/304","19/18866",0.265673307164399,0.265673307164399,0.50731527214366,"BNIP3",1
GO:0010666,"GO:0010666","positive regulation of cardiac muscle cell apoptotic process","1/304","19/18866",0.265673307164399,0.265673307164399,0.50731527214366,"BNIP3",1
GO:0019184,"GO:0019184","nonribosomal peptide biosynthetic process","1/304","19/18866",0.265673307164399,0.265673307164399,0.50731527214366,"GCLC",1
GO:0032011,"GO:0032011","ARF protein signal transduction","1/304","19/18866",0.265673307164399,0.265673307164399,0.50731527214366,"IQSEC1",1
GO:0032012,"GO:0032012","regulation of ARF protein signal transduction","1/304","19/18866",0.265673307164399,0.265673307164399,0.50731527214366,"IQSEC1",1
GO:0032239,"GO:0032239","regulation of nucleobase-containing compound transport","1/304","19/18866",0.265673307164399,0.265673307164399,0.50731527214366,"CPSF6",1
GO:0035269,"GO:0035269","protein O-linked mannosylation","1/304","19/18866",0.265673307164399,0.265673307164399,0.50731527214366,"B4GAT1",1
GO:0035988,"GO:0035988","chondrocyte proliferation","1/304","19/18866",0.265673307164399,0.265673307164399,0.50731527214366,"SMAD7",1
GO:0036342,"GO:0036342","post-anal tail morphogenesis","1/304","19/18866",0.265673307164399,0.265673307164399,0.50731527214366,"SP5",1
GO:0042053,"GO:0042053","regulation of dopamine metabolic process","1/304","19/18866",0.265673307164399,0.265673307164399,0.50731527214366,"PRKN",1
GO:0042069,"GO:0042069","regulation of catecholamine metabolic process","1/304","19/18866",0.265673307164399,0.265673307164399,0.50731527214366,"PRKN",1
GO:0045063,"GO:0045063","T-helper 1 cell differentiation","1/304","19/18866",0.265673307164399,0.265673307164399,0.50731527214366,"RIPK2",1
GO:0045780,"GO:0045780","positive regulation of bone resorption","1/304","19/18866",0.265673307164399,0.265673307164399,0.50731527214366,"SPP1",1
GO:0045947,"GO:0045947","negative regulation of translational initiation","1/304","19/18866",0.265673307164399,0.265673307164399,0.50731527214366,"C8orf88",1
GO:0046629,"GO:0046629","gamma-delta T cell activation","1/304","19/18866",0.265673307164399,0.265673307164399,0.50731527214366,"CXADR",1
GO:0046653,"GO:0046653","tetrahydrofolate metabolic process","1/304","19/18866",0.265673307164399,0.265673307164399,0.50731527214366,"GCH1",1
GO:0046852,"GO:0046852","positive regulation of bone remodeling","1/304","19/18866",0.265673307164399,0.265673307164399,0.50731527214366,"SPP1",1
GO:0051546,"GO:0051546","keratinocyte migration","1/304","19/18866",0.265673307164399,0.265673307164399,0.50731527214366,"IQSEC1",1
GO:0060602,"GO:0060602","branch elongation of an epithelium","1/304","19/18866",0.265673307164399,0.265673307164399,0.50731527214366,"MED1",1
GO:0060973,"GO:0060973","cell migration involved in heart development","1/304","19/18866",0.265673307164399,0.265673307164399,0.50731527214366,"BMP7",1
GO:0070989,"GO:0070989","oxidative demethylation","1/304","19/18866",0.265673307164399,0.265673307164399,0.50731527214366,"CYP3A5",1
GO:0071625,"GO:0071625","vocalization behavior","1/304","19/18866",0.265673307164399,0.265673307164399,0.50731527214366,"SHANK2",1
GO:0072074,"GO:0072074","kidney mesenchyme development","1/304","19/18866",0.265673307164399,0.265673307164399,0.50731527214366,"BMP7",1
GO:0097623,"GO:0097623","potassium ion export across plasma membrane","1/304","19/18866",0.265673307164399,0.265673307164399,0.50731527214366,"KCNT2",1
GO:0098856,"GO:0098856","intestinal lipid absorption","1/304","19/18866",0.265673307164399,0.265673307164399,0.50731527214366,"LDLR",1
GO:0098911,"GO:0098911","regulation of ventricular cardiac muscle cell action potential","1/304","19/18866",0.265673307164399,0.265673307164399,0.50731527214366,"PKP2",1
GO:0150079,"GO:0150079","negative regulation of neuroinflammatory response","1/304","19/18866",0.265673307164399,0.265673307164399,0.50731527214366,"LDLR",1
GO:1902176,"GO:1902176","negative regulation of oxidative stress-induced intrinsic apoptotic signaling pathway","1/304","19/18866",0.265673307164399,0.265673307164399,0.50731527214366,"PRKN",1
GO:2000319,"GO:2000319","regulation of T-helper 17 cell differentiation","1/304","19/18866",0.265673307164399,0.265673307164399,0.50731527214366,"SMAD7",1
GO:2000757,"GO:2000757","negative regulation of peptidyl-lysine acetylation","1/304","19/18866",0.265673307164399,0.265673307164399,0.50731527214366,"ATG5",1
GO:0002526,"GO:0002526","acute inflammatory response","3/304","111/18866",0.265682480771344,0.265682480771344,0.50731527214366,"ASS1/F8/FN1",3
GO:0098732,"GO:0098732","macromolecule deacylation","3/304","111/18866",0.265682480771344,0.265682480771344,0.50731527214366,"CCAR2/LYPLA1/LYPLAL1",3
GO:0070374,"GO:0070374","positive regulation of ERK1 and ERK2 cascade","5/304","215/18866",0.266430689212357,0.266430689212357,0.508459109842407,"BRAF/CAVIN3/FGFR4/JUN/RIPK2",5
GO:0006665,"GO:0006665","sphingolipid metabolic process","4/304","163/18866",0.26873598322238,0.26873598322238,0.51184951422867,"ACER3/ELOVL7/GM2A/HACD1",4
GO:0051651,"GO:0051651","maintenance of location in cell","5/304","216/18866",0.26949681555294,0.26949681555294,0.51184951422867,"ATG5/DBN1/ERO1A/INSIG1/TRPC1",5
GO:0002287,"GO:0002287","alpha-beta T cell activation involved in immune response","2/304","63/18866",0.269854378075735,0.269854378075735,0.51184951422867,"RIPK2/SMAD7",2
GO:0002293,"GO:0002293","alpha-beta T cell differentiation involved in immune response","2/304","63/18866",0.269854378075735,0.269854378075735,0.51184951422867,"RIPK2/SMAD7",2
GO:0046530,"GO:0046530","photoreceptor cell differentiation","2/304","63/18866",0.269854378075735,0.269854378075735,0.51184951422867,"AGTPBP1/RORB",2
GO:0070059,"GO:0070059","intrinsic apoptotic signaling pathway in response to endoplasmic reticulum stress","2/304","63/18866",0.269854378075735,0.269854378075735,0.51184951422867,"ERO1A/PRKN",2
GO:2000514,"GO:2000514","regulation of CD4-positive, alpha-beta T cell activation","2/304","63/18866",0.269854378075735,0.269854378075735,0.51184951422867,"RIPK2/SMAD7",2
GO:0018393,"GO:0018393","internal peptidyl-lysine acetylation","4/304","164/18866",0.272299260387235,0.272299260387235,0.51184951422867,"ACTL6A/ATG5/KAT2B/PHF14",4
GO:0046165,"GO:0046165","alcohol biosynthetic process","4/304","164/18866",0.272299260387235,0.272299260387235,0.51184951422867,"ACER3/GCH1/INSIG1/MOXD1",4
GO:0035821,"GO:0035821","modulation of process of other organism","3/304","113/18866",0.274407936201032,0.274407936201032,0.51184951422867,"ATG5/JUN/PRKN",3
GO:0006338,"GO:0006338","chromatin remodeling","5/304","218/18866",0.275652119170608,0.275652119170608,0.51184951422867,"ACTL6A/ACTR6/CENPI/KAT2B/SMARCD1",5
GO:0002066,"GO:0002066","columnar/cuboidal epithelial cell development","2/304","64/18866",0.275839197495515,0.275839197495515,0.51184951422867,"HNF4A/WHRN",2
GO:0032507,"GO:0032507","maintenance of protein location in cell","2/304","64/18866",0.275839197495515,0.275839197495515,0.51184951422867,"DBN1/INSIG1",2
GO:0045453,"GO:0045453","bone resorption","2/304","64/18866",0.275839197495515,0.275839197495515,0.51184951422867,"PDK4/SPP1",2
GO:0046173,"GO:0046173","polyol biosynthetic process","2/304","64/18866",0.275839197495515,0.275839197495515,0.51184951422867,"ACER3/GCH1",2
GO:0046637,"GO:0046637","regulation of alpha-beta T cell differentiation","2/304","64/18866",0.275839197495515,0.275839197495515,0.51184951422867,"RIPK2/SMAD7",2
GO:0046686,"GO:0046686","response to cadmium ion","2/304","64/18866",0.275839197495515,0.275839197495515,0.51184951422867,"GCLC/JUN",2
GO:0051898,"GO:0051898","negative regulation of protein kinase B signaling","2/304","64/18866",0.275839197495515,0.275839197495515,0.51184951422867,"CAVIN3/PHLPP2",2
GO:0060135,"GO:0060135","maternal process involved in female pregnancy","2/304","64/18866",0.275839197495515,0.275839197495515,0.51184951422867,"MED1/SPP1",2
GO:0070265,"GO:0070265","necrotic cell death","2/304","64/18866",0.275839197495515,0.275839197495515,0.51184951422867,"BNIP3/YBX3",2
GO:0002689,"GO:0002689","negative regulation of leukocyte chemotaxis","1/304","20/18866",0.277517914508911,0.277517914508911,0.51184951422867,"SLIT2",1
GO:0002726,"GO:0002726","positive regulation of T cell cytokine production","1/304","20/18866",0.277517914508911,0.277517914508911,0.51184951422867,"FZD5",1
GO:0002827,"GO:0002827","positive regulation of T-helper 1 type immune response","1/304","20/18866",0.277517914508911,0.277517914508911,0.51184951422867,"RIPK2",1
GO:0002902,"GO:0002902","regulation of B cell apoptotic process","1/304","20/18866",0.277517914508911,0.277517914508911,0.51184951422867,"IRS2",1
GO:0003323,"GO:0003323","type B pancreatic cell development","1/304","20/18866",0.277517914508911,0.277517914508911,0.51184951422867,"HNF4A",1
GO:0006144,"GO:0006144","purine nucleobase metabolic process","1/304","20/18866",0.277517914508911,0.277517914508911,0.51184951422867,"DPYD",1
GO:0006743,"GO:0006743","ubiquinone metabolic process","1/304","20/18866",0.277517914508911,0.277517914508911,0.51184951422867,"COQ10B",1
GO:0007350,"GO:0007350","blastoderm segmentation","1/304","20/18866",0.277517914508911,0.277517914508911,0.51184951422867,"FZD5",1
GO:0008090,"GO:0008090","retrograde axonal transport","1/304","20/18866",0.277517914508911,0.277517914508911,0.51184951422867,"FBXW11",1
GO:0010875,"GO:0010875","positive regulation of cholesterol efflux","1/304","20/18866",0.277517914508911,0.277517914508911,0.51184951422867,"PLTP",1
GO:0010878,"GO:0010878","cholesterol storage","1/304","20/18866",0.277517914508911,0.277517914508911,0.51184951422867,"STARD4",1
GO:0023019,"GO:0023019","signal transduction involved in regulation of gene expression","1/304","20/18866",0.277517914508911,0.277517914508911,0.51184951422867,"HNF4A",1
GO:0030903,"GO:0030903","notochord development","1/304","20/18866",0.277517914508911,0.277517914508911,0.51184951422867,"GLI1",1
GO:0031290,"GO:0031290","retinal ganglion cell axon guidance","1/304","20/18866",0.277517914508911,0.277517914508911,0.51184951422867,"SLIT2",1
GO:0031498,"GO:0031498","chromatin disassembly","1/304","20/18866",0.277517914508911,0.277517914508911,0.51184951422867,"SMARCD1",1
GO:0031998,"GO:0031998","regulation of fatty acid beta-oxidation","1/304","20/18866",0.277517914508911,0.277517914508911,0.51184951422867,"IRS2",1
GO:0032303,"GO:0032303","regulation of icosanoid secretion","1/304","20/18866",0.277517914508911,0.277517914508911,0.51184951422867,"EDN1",1
GO:0032332,"GO:0032332","positive regulation of chondrocyte differentiation","1/304","20/18866",0.277517914508911,0.277517914508911,0.51184951422867,"SMAD7",1
GO:0032495,"GO:0032495","response to muramyl dipeptide","1/304","20/18866",0.277517914508911,0.277517914508911,0.51184951422867,"RIPK2",1
GO:0032727,"GO:0032727","positive regulation of interferon-alpha production","1/304","20/18866",0.277517914508911,0.277517914508911,0.51184951422867,"RIPK2",1
GO:0032986,"GO:0032986","protein-DNA complex disassembly","1/304","20/18866",0.277517914508911,0.277517914508911,0.51184951422867,"SMARCD1",1
GO:0034315,"GO:0034315","regulation of Arp2/3 complex-mediated actin nucleation","1/304","20/18866",0.277517914508911,0.277517914508911,0.51184951422867,"PICK1",1
GO:0035493,"GO:0035493","SNARE complex assembly","1/304","20/18866",0.277517914508911,0.277517914508911,0.51184951422867,"VAMP1",1
GO:0043046,"GO:0043046","DNA methylation involved in gamete generation","1/304","20/18866",0.277517914508911,0.277517914508911,0.51184951422867,"PICK1",1
GO:0045019,"GO:0045019","negative regulation of nitric oxide biosynthetic process","1/304","20/18866",0.277517914508911,0.277517914508911,0.51184951422867,"WDR35",1
GO:0045618,"GO:0045618","positive regulation of keratinocyte differentiation","1/304","20/18866",0.277517914508911,0.277517914508911,0.51184951422867,"MED1",1
GO:0048670,"GO:0048670","regulation of collateral sprouting","1/304","20/18866",0.277517914508911,0.277517914508911,0.51184951422867,"SPP1",1
GO:0051412,"GO:0051412","response to corticosterone","1/304","20/18866",0.277517914508911,0.277517914508911,0.51184951422867,"FOXO3",1
GO:0051767,"GO:0051767","nitric-oxide synthase biosynthetic process","1/304","20/18866",0.277517914508911,0.277517914508911,0.51184951422867,"EDN1",1
GO:0051769,"GO:0051769","regulation of nitric-oxide synthase biosynthetic process","1/304","20/18866",0.277517914508911,0.277517914508911,0.51184951422867,"EDN1",1
GO:0060039,"GO:0060039","pericardium development","1/304","20/18866",0.277517914508911,0.277517914508911,0.51184951422867,"BMP7",1
GO:0060546,"GO:0060546","negative regulation of necroptotic process","1/304","20/18866",0.277517914508911,0.277517914508911,0.51184951422867,"YBX3",1
GO:0062099,"GO:0062099","negative regulation of programmed necrotic cell death","1/304","20/18866",0.277517914508911,0.277517914508911,0.51184951422867,"YBX3",1
GO:0071636,"GO:0071636","positive regulation of transforming growth factor beta production","1/304","20/18866",0.277517914508911,0.277517914508911,0.51184951422867,"CREB1",1
GO:0097503,"GO:0097503","sialylation","1/304","20/18866",0.277517914508911,0.277517914508911,0.51184951422867,"ST3GAL1",1
GO:0098703,"GO:0098703","calcium ion import across plasma membrane","1/304","20/18866",0.277517914508911,0.277517914508911,0.51184951422867,"FYN",1
GO:1900409,"GO:1900409","positive regulation of cellular response to oxidative stress","1/304","20/18866",0.277517914508911,0.277517914508911,0.51184951422867,"FOXO3",1
GO:1901881,"GO:1901881","positive regulation of protein depolymerization","1/304","20/18866",0.277517914508911,0.277517914508911,0.51184951422867,"SEMA5A",1
GO:1902004,"GO:1902004","positive regulation of amyloid-beta formation","1/304","20/18866",0.277517914508911,0.277517914508911,0.51184951422867,"EPHA4",1
GO:1902236,"GO:1902236","negative regulation of endoplasmic reticulum stress-induced intrinsic apoptotic signaling pathway","1/304","20/18866",0.277517914508911,0.277517914508911,0.51184951422867,"PRKN",1
GO:1904406,"GO:1904406","negative regulation of nitric oxide metabolic process","1/304","20/18866",0.277517914508911,0.277517914508911,0.51184951422867,"WDR35",1
GO:2000193,"GO:2000193","positive regulation of fatty acid transport","1/304","20/18866",0.277517914508911,0.277517914508911,0.51184951422867,"EDN1",1
GO:0022407,"GO:0022407","regulation of cell-cell adhesion","9/304","439/18866",0.278109813416076,0.278109813416076,0.512663787447698,"ASS1/BMP7/FOXA2/FYN/MIA3/RIPK2/SMAD7/TENM3/YES1",9
GO:0006260,"GO:0006260","DNA replication","6/304","273/18866",0.278323454234322,0.278323454234322,0.512780281542382,"CCNE2/GLI1/JUN/MCM7/POLE4/TBRG1",6
GO:0022037,"GO:0022037","metencephalon development","3/304","114/18866",0.278782001740968,0.278782001740968,0.513347619572496,"AGTPBP1/GLI1/WHRN",3
GO:0006475,"GO:0006475","internal protein amino acid acetylation","4/304","166/18866",0.279449944049388,0.279449944049388,0.513744915024084,"ACTL6A/ATG5/KAT2B/PHF14",4
GO:0035967,"GO:0035967","cellular response to topologically incorrect protein","4/304","166/18866",0.279449944049388,0.279449944049388,0.513744915024084,"ERO1A/KLHL15/PRKN/TBL2",4
GO:0048515,"GO:0048515","spermatid differentiation","4/304","166/18866",0.279449944049388,0.279449944049388,0.513744915024084,"CEP57/QKI/STRBP/TBPL1",4
GO:0009206,"GO:0009206","purine ribonucleoside triphosphate biosynthetic process","2/304","65/18866",0.281821359299494,0.281821359299494,0.515491753473156,"NME9/SLC25A13",2
GO:0017156,"GO:0017156","calcium-ion regulated exocytosis","2/304","65/18866",0.281821359299494,0.281821359299494,0.515491753473156,"SYT12/UNC13A",2
GO:0031646,"GO:0031646","positive regulation of nervous system process","2/304","65/18866",0.281821359299494,0.281821359299494,0.515491753473156,"RGS4/SHANK2",2
GO:0032729,"GO:0032729","positive regulation of interferon-gamma production","2/304","65/18866",0.281821359299494,0.281821359299494,0.515491753473156,"FZD5/RIPK2",2
GO:0044786,"GO:0044786","cell cycle DNA replication","2/304","65/18866",0.281821359299494,0.281821359299494,0.515491753473156,"MCM7/POLE4",2
GO:0045604,"GO:0045604","regulation of epidermal cell differentiation","2/304","65/18866",0.281821359299494,0.281821359299494,0.515491753473156,"CD109/MED1",2
GO:0060389,"GO:0060389","pathway-restricted SMAD protein phosphorylation","2/304","65/18866",0.281821359299494,0.281821359299494,0.515491753473156,"BMP7/SMAD7",2
GO:1902305,"GO:1902305","regulation of sodium ion transmembrane transport","2/304","65/18866",0.281821359299494,0.281821359299494,0.515491753473156,"FXYD2/NETO2",2
GO:0099003,"GO:0099003","vesicle-mediated transport in synapse","5/304","220/18866",0.281836487234423,0.281836487234423,0.515491753473156,"BACE1/STON2/SYT12/UNC13A/VAMP1",5
GO:0051261,"GO:0051261","protein depolymerization","3/304","115/18866",0.283162710986086,0.283162710986086,0.515491753473156,"PLEKHH2/SEMA5A/TPX2",3
GO:0007281,"GO:0007281","germ cell development","6/304","275/18866",0.283844433382642,0.283844433382642,0.515491753473156,"CEP57/FBXW11/FOXO3/QKI/STRBP/TBPL1",6
GO:0006163,"GO:0006163","purine nucleotide metabolic process","9/304","442/18866",0.284599234727792,0.284599234727792,0.515491753473156,"ADCY7/BPGM/DBI/ELOVL7/HACD1/NME9/PDK4/PDP1/SLC25A13",9
GO:0002819,"GO:0002819","regulation of adaptive immune response","4/304","168/18866",0.286630221212775,0.286630221212775,0.515491753473156,"ADCY7/FZD5/RIPK2/SMAD7",4
GO:0032392,"GO:0032392","DNA geometric change","3/304","116/18866",0.287549389049194,0.287549389049194,0.515491753473156,"CETN2/MCM7/MTERF1",3
GO:1903828,"GO:1903828","negative regulation of cellular protein localization","3/304","116/18866",0.287549389049194,0.287549389049194,0.515491753473156,"INSIG1/LYPLA1/PPP2R5A",3
GO:0009145,"GO:0009145","purine nucleoside triphosphate biosynthetic process","2/304","66/18866",0.287799399637081,0.287799399637081,0.515491753473156,"NME9/SLC25A13",2
GO:0032768,"GO:0032768","regulation of monooxygenase activity","2/304","66/18866",0.287799399637081,0.287799399637081,0.515491753473156,"GCH1/LYPLA1",2
GO:0032922,"GO:0032922","circadian regulation of gene expression","2/304","66/18866",0.287799399637081,0.287799399637081,0.515491753473156,"CAVIN3/RBM4B",2
GO:0046626,"GO:0046626","regulation of insulin receptor signaling pathway","2/304","66/18866",0.287799399637081,0.287799399637081,0.515491753473156,"SORBS1/TNS2",2
GO:0050922,"GO:0050922","negative regulation of chemotaxis","2/304","66/18866",0.287799399637081,0.287799399637081,0.515491753473156,"SEMA5A/SLIT2",2
GO:1901016,"GO:1901016","regulation of potassium ion transmembrane transporter activity","2/304","66/18866",0.287799399637081,0.287799399637081,0.515491753473156,"KCNS1/NETO2",2
GO:1901607,"GO:1901607","alpha-amino acid biosynthetic process","2/304","66/18866",0.287799399637081,0.287799399637081,0.515491753473156,"ASL/ASS1",2
GO:0050953,"GO:0050953","sensory perception of light stimulus","5/304","222/18866",0.288047924133329,0.288047924133329,0.515491753473156,"CRYZ/GRM8/NXNL2/RORB/WHRN",5
GO:0000028,"GO:0000028","ribosomal small subunit assembly","1/304","21/18866",0.289172088019963,0.289172088019963,0.515491753473156,"MRPS7",1
GO:0009110,"GO:0009110","vitamin biosynthetic process","1/304","21/18866",0.289172088019963,0.289172088019963,0.515491753473156,"PLTP",1
GO:0010310,"GO:0010310","regulation of hydrogen peroxide metabolic process","1/304","21/18866",0.289172088019963,0.289172088019963,0.515491753473156,"FYN",1
GO:0010801,"GO:0010801","negative regulation of peptidyl-threonine phosphorylation","1/304","21/18866",0.289172088019963,0.289172088019963,0.515491753473156,"SMAD7",1
GO:0010829,"GO:0010829","negative regulation of glucose transmembrane transport","1/304","21/18866",0.289172088019963,0.289172088019963,0.515491753473156,"FABP5",1
GO:0010893,"GO:0010893","positive regulation of steroid biosynthetic process","1/304","21/18866",0.289172088019963,0.289172088019963,0.515491753473156,"STARD4",1
GO:0014821,"GO:0014821","phasic smooth muscle contraction","1/304","21/18866",0.289172088019963,0.289172088019963,0.515491753473156,"EDN1",1
GO:0021854,"GO:0021854","hypothalamus development","1/304","21/18866",0.289172088019963,0.289172088019963,0.515491753473156,"POU3F2",1
GO:0030728,"GO:0030728","ovulation","1/304","21/18866",0.289172088019963,0.289172088019963,0.515491753473156,"FOXO3",1
GO:0032482,"GO:0032482","Rab protein signal transduction","1/304","21/18866",0.289172088019963,0.289172088019963,0.515491753473156,"RAB33B",1
GO:0035455,"GO:0035455","response to interferon-alpha","1/304","21/18866",0.289172088019963,0.289172088019963,0.515491753473156,"PDE12",1
GO:0035813,"GO:0035813","regulation of renal sodium excretion","1/304","21/18866",0.289172088019963,0.289172088019963,0.515491753473156,"EDN1",1
GO:0043371,"GO:0043371","negative regulation of CD4-positive, alpha-beta T cell differentiation","1/304","21/18866",0.289172088019963,0.289172088019963,0.515491753473156,"SMAD7",1
GO:0043984,"GO:0043984","histone H4-K16 acetylation","1/304","21/18866",0.289172088019963,0.289172088019963,0.515491753473156,"ATG5",1
GO:0044241,"GO:0044241","lipid digestion","1/304","21/18866",0.289172088019963,0.289172088019963,0.515491753473156,"LDLR",1
GO:0045717,"GO:0045717","negative regulation of fatty acid biosynthetic process","1/304","21/18866",0.289172088019963,0.289172088019963,0.515491753473156,"INSIG1",1
GO:0046519,"GO:0046519","sphingoid metabolic process","1/304","21/18866",0.289172088019963,0.289172088019963,0.515491753473156,"ACER3",1
GO:0046641,"GO:0046641","positive regulation of alpha-beta T cell proliferation","1/304","21/18866",0.289172088019963,0.289172088019963,0.515491753473156,"RIPK2",1
GO:0060065,"GO:0060065","uterus development","1/304","21/18866",0.289172088019963,0.289172088019963,0.515491753473156,"GREB1L",1
GO:0060117,"GO:0060117","auditory receptor cell development","1/304","21/18866",0.289172088019963,0.289172088019963,0.515491753473156,"WHRN",1
GO:0061003,"GO:0061003","positive regulation of dendritic spine morphogenesis","1/304","21/18866",0.289172088019963,0.289172088019963,0.515491753473156,"DBN1",1
GO:0071498,"GO:0071498","cellular response to fluid shear stress","1/304","21/18866",0.289172088019963,0.289172088019963,0.515491753473156,"ASS1",1
GO:0072111,"GO:0072111","cell proliferation involved in kidney development","1/304","21/18866",0.289172088019963,0.289172088019963,0.515491753473156,"BMP7",1
GO:0080182,"GO:0080182","histone H3-K4 trimethylation","1/304","21/18866",0.289172088019963,0.289172088019963,0.515491753473156,"KMT2E",1
GO:0090201,"GO:0090201","negative regulation of release of cytochrome c from mitochondria","1/304","21/18866",0.289172088019963,0.289172088019963,0.515491753473156,"PRKN",1
GO:0098698,"GO:0098698","postsynaptic specialization assembly","1/304","21/18866",0.289172088019963,0.289172088019963,0.515491753473156,"SHANK2",1
GO:0098780,"GO:0098780","response to mitochondrial depolarisation","1/304","21/18866",0.289172088019963,0.289172088019963,0.515491753473156,"PRKN",1
GO:1902656,"GO:1902656","calcium ion import into cytosol","1/304","21/18866",0.289172088019963,0.289172088019963,0.515491753473156,"FYN",1
GO:1903204,"GO:1903204","negative regulation of oxidative stress-induced neuron death","1/304","21/18866",0.289172088019963,0.289172088019963,0.515491753473156,"PRKN",1
GO:1903978,"GO:1903978","regulation of microglial cell activation","1/304","21/18866",0.289172088019963,0.289172088019963,0.515491753473156,"LDLR",1
GO:1904886,"GO:1904886","beta-catenin destruction complex disassembly","1/304","21/18866",0.289172088019963,0.289172088019963,0.515491753473156,"FZD5",1
GO:2000047,"GO:2000047","regulation of cell-cell adhesion mediated by cadherin","1/304","21/18866",0.289172088019963,0.289172088019963,0.515491753473156,"FOXA2",1
GO:2000269,"GO:2000269","regulation of fibroblast apoptotic process","1/304","21/18866",0.289172088019963,0.289172088019963,0.515491753473156,"STK17A",1
GO:2000678,"GO:2000678","negative regulation of transcription regulatory region DNA binding","1/304","21/18866",0.289172088019963,0.289172088019963,0.515491753473156,"HEY1",1
GO:2000738,"GO:2000738","positive regulation of stem cell differentiation","1/304","21/18866",0.289172088019963,0.289172088019963,0.515491753473156,"BMP7",1
GO:0016125,"GO:0016125","sterol metabolic process","4/304","169/18866",0.290230499180709,0.290230499180709,0.517108072934292,"FDX1/INSIG1/LDLR/LIPA",4
GO:0018209,"GO:0018209","peptidyl-serine modification","7/304","333/18866",0.291310025711178,0.291310025711178,0.518760305369187,"BRAF/CAMK4/PLCL1/RIPK2/SH2D3A/SMAD7/TRIM6",7
GO:0043666,"GO:0043666","regulation of phosphoprotein phosphatase activity","3/304","117/18866",0.29194137011867,0.29194137011867,0.519613113340253,"ENSA/PPP2R5A/PPP2R5E",3
GO:0006026,"GO:0006026","aminoglycan catabolic process","2/304","67/18866",0.293771902215535,0.293771902215535,0.522325683976554,"GPC5/VCAN",2
GO:0034332,"GO:0034332","adherens junction organization","2/304","67/18866",0.293771902215535,0.293771902215535,0.522325683976554,"EPHA4/SMAD7",2
GO:0042692,"GO:0042692","muscle cell differentiation","8/304","390/18866",0.29405061434452,0.29405061434452,0.522448448779027,"ATG5/CXADR/EDN1/HEY1/MRTFB/MYOF/QKI/RGS4",8
GO:0022409,"GO:0022409","positive regulation of cell-cell adhesion","6/304","279/18866",0.29495769774172,0.29495769774172,0.522448448779027,"BMP7/FOXA2/FYN/RIPK2/SMAD7/YES1",6
GO:0015918,"GO:0015918","sterol transport","3/304","118/18866",0.296337997515404,0.296337997515404,0.522448448779027,"LDLR/PLTP/STARD4",3
GO:0033559,"GO:0033559","unsaturated fatty acid metabolic process","3/304","118/18866",0.296337997515404,0.296337997515404,0.522448448779027,"EDN1/ELOVL7/FABP5",3
GO:0051209,"GO:0051209","release of sequestered calcium ion into cytosol","3/304","118/18866",0.296337997515404,0.296337997515404,0.522448448779027,"ATG5/ERO1A/TRPC1",3
GO:2000736,"GO:2000736","regulation of stem cell differentiation","3/304","118/18866",0.296337997515404,0.296337997515404,0.522448448779027,"BMP7/LBH/TRIM6",3
GO:0140056,"GO:0140056","organelle localization by membrane tethering","4/304","171/18866",0.297449439395901,0.297449439395901,0.522448448779027,"CEP57/CETN2/PLK4/UNC13A",4
GO:0034381,"GO:0034381","plasma lipoprotein particle clearance","2/304","68/18866",0.29973749715609,0.29973749715609,0.522448448779027,"LDLR/LIPA",2
GO:0040014,"GO:0040014","regulation of multicellular organism growth","2/304","68/18866",0.29973749715609,0.29973749715609,0.522448448779027,"CREB1/POU3F2",2
GO:0072577,"GO:0072577","endothelial cell apoptotic process","2/304","68/18866",0.29973749715609,0.29973749715609,0.522448448779027,"FOXO3/SEMA5A",2
GO:0072665,"GO:0072665","protein localization to vacuole","2/304","68/18866",0.29973749715609,0.29973749715609,0.522448448779027,"ATP13A2/M6PR",2
GO:0008037,"GO:0008037","cell recognition","5/304","226/18866",0.300544079348806,0.300544079348806,0.522448448779027,"EPHA4/SEMA5A/SPA17/VCAN/YWHAZ",5
GO:0044706,"GO:0044706","multi-multicellular organism process","5/304","226/18866",0.300544079348806,0.300544079348806,0.522448448779027,"EDN1/IGFBP7/MED1/SMURF2/SPP1",5
GO:2001020,"GO:2001020","regulation of response to DNA damage stimulus","5/304","226/18866",0.300544079348806,0.300544079348806,0.522448448779027,"CCAR2/FANCB/KLHL15/PTTG1IP/SKIL",5
GO:0000717,"GO:0000717","nucleotide-excision repair, DNA duplex unwinding","1/304","22/18866",0.300638879489421,0.300638879489421,0.522448448779027,"CETN2",1
GO:0001573,"GO:0001573","ganglioside metabolic process","1/304","22/18866",0.300638879489421,0.300638879489421,0.522448448779027,"GM2A",1
GO:0006071,"GO:0006071","glycerol metabolic process","1/304","22/18866",0.300638879489421,0.300638879489421,0.522448448779027,"MYOF",1
GO:0006379,"GO:0006379","mRNA cleavage","1/304","22/18866",0.300638879489421,0.300638879489421,0.522448448779027,"CPSF6",1
GO:0006622,"GO:0006622","protein targeting to lysosome","1/304","22/18866",0.300638879489421,0.300638879489421,0.522448448779027,"M6PR",1
GO:0009083,"GO:0009083","branched-chain amino acid catabolic process","1/304","22/18866",0.300638879489421,0.300638879489421,0.522448448779027,"DBT",1
GO:0009190,"GO:0009190","cyclic nucleotide biosynthetic process","1/304","22/18866",0.300638879489421,0.300638879489421,0.522448448779027,"ADCY7",1
GO:0009220,"GO:0009220","pyrimidine ribonucleotide biosynthetic process","1/304","22/18866",0.300638879489421,0.300638879489421,0.522448448779027,"NME9",1
GO:0021533,"GO:0021533","cell differentiation in hindbrain","1/304","22/18866",0.300638879489421,0.300638879489421,0.522448448779027,"AGTPBP1",1
GO:0032069,"GO:0032069","regulation of nuclease activity","1/304","22/18866",0.300638879489421,0.300638879489421,0.522448448779027,"TCEA1",1
GO:0035809,"GO:0035809","regulation of urine volume","1/304","22/18866",0.300638879489421,0.300638879489421,0.522448448779027,"EDN1",1
GO:0035970,"GO:0035970","peptidyl-threonine dephosphorylation","1/304","22/18866",0.300638879489421,0.300638879489421,0.522448448779027,"PDP1",1
GO:0042438,"GO:0042438","melanin biosynthetic process","1/304","22/18866",0.300638879489421,0.300638879489421,0.522448448779027,"TRPC1",1
GO:0045061,"GO:0045061","thymic T cell selection","1/304","22/18866",0.300638879489421,0.300638879489421,0.522448448779027,"ATG5",1
GO:0045624,"GO:0045624","positive regulation of T-helper cell differentiation","1/304","22/18866",0.300638879489421,0.300638879489421,0.522448448779027,"RIPK2",1
GO:0045655,"GO:0045655","regulation of monocyte differentiation","1/304","22/18866",0.300638879489421,0.300638879489421,0.522448448779027,"JUN",1
GO:0045663,"GO:0045663","positive regulation of myoblast differentiation","1/304","22/18866",0.300638879489421,0.300638879489421,0.522448448779027,"RANBP3L",1
GO:0046058,"GO:0046058","cAMP metabolic process","1/304","22/18866",0.300638879489421,0.300638879489421,0.522448448779027,"ADCY7",1
GO:0050765,"GO:0050765","negative regulation of phagocytosis","1/304","22/18866",0.300638879489421,0.300638879489421,0.522448448779027,"ATG5",1
GO:0051000,"GO:0051000","positive regulation of nitric-oxide synthase activity","1/304","22/18866",0.300638879489421,0.300638879489421,0.522448448779027,"GCH1",1
GO:0051131,"GO:0051131","chaperone-mediated protein complex assembly","1/304","22/18866",0.300638879489421,0.300638879489421,0.522448448779027,"PSMG1",1
GO:0051291,"GO:0051291","protein heterooligomerization","1/304","22/18866",0.300638879489421,0.300638879489421,0.522448448779027,"CPSF6",1
GO:0051900,"GO:0051900","regulation of mitochondrial depolarization","1/304","22/18866",0.300638879489421,0.300638879489421,0.522448448779027,"GCLC",1
GO:0052652,"GO:0052652","cyclic purine nucleotide metabolic process","1/304","22/18866",0.300638879489421,0.300638879489421,0.522448448779027,"ADCY7",1
GO:0055093,"GO:0055093","response to hyperoxia","1/304","22/18866",0.300638879489421,0.300638879489421,0.522448448779027,"BNIP3",1
GO:0060487,"GO:0060487","lung epithelial cell differentiation","1/304","22/18866",0.300638879489421,0.300638879489421,0.522448448779027,"CREB1",1
GO:0071359,"GO:0071359","cellular response to dsRNA","1/304","22/18866",0.300638879489421,0.300638879489421,0.522448448779027,"PDE12",1
GO:1902884,"GO:1902884","positive regulation of response to oxidative stress","1/304","22/18866",0.300638879489421,0.300638879489421,0.522448448779027,"FOXO3",1
GO:2000316,"GO:2000316","regulation of T-helper 17 type immune response","1/304","22/18866",0.300638879489421,0.300638879489421,0.522448448779027,"SMAD7",1
GO:0046660,"GO:0046660","female sex differentiation","3/304","119/18866",0.300738623742813,0.300738623742813,0.522448448779027,"FOXO3/SLIT2/TIPARP",3
GO:0051283,"GO:0051283","negative regulation of sequestering of calcium ion","3/304","119/18866",0.300738623742813,0.300738623742813,0.522448448779027,"ATG5/ERO1A/TRPC1",3
GO:0018394,"GO:0018394","peptidyl-lysine acetylation","4/304","172/18866",0.30106735167621,0.30106735167621,0.522753081871232,"ACTL6A/ATG5/KAT2B/PHF14",4
GO:1903829,"GO:1903829","positive regulation of cellular protein localization","7/304","338/18866",0.304037620897855,0.304037620897855,0.52688719563751,"ABLIM3/FYN/FZD5/MYO1C/PRKN/SORBS1/YWHAZ",7
GO:0050954,"GO:0050954","sensory perception of mechanical stimulus","4/304","173/18866",0.304690396598147,0.304690396598147,0.52688719563751,"BACE1/FYN/SOBP/WHRN",4
GO:0006513,"GO:0006513","protein monoubiquitination","2/304","69/18866",0.305694859874412,0.305694859874412,0.52688719563751,"PRKN/UBE2O",2
GO:0030032,"GO:0030032","lamellipodium assembly","2/304","69/18866",0.305694859874412,0.305694859874412,0.52688719563751,"ABLIM3/SLIT2",2
GO:0042698,"GO:0042698","ovulation cycle","2/304","69/18866",0.305694859874412,0.305694859874412,0.52688719563751,"FOXO3/SLIT2",2
GO:0060038,"GO:0060038","cardiac muscle cell proliferation","2/304","69/18866",0.305694859874412,0.305694859874412,0.52688719563751,"CXADR/GLI1",2
GO:0016579,"GO:0016579","protein deubiquitination","6/304","283/18866",0.306156706947467,0.306156706947467,0.52688719563751,"ACTL6A/KAT2B/PRKN/SMAD7/SMURF2/USP13",6
GO:0010959,"GO:0010959","regulation of metal ion transport","8/304","396/18866",0.308200458087125,0.308200458087125,0.52688719563751,"ATG5/FXYD2/FYN/KCNS1/NETO2/PKP2/RGS4/TRPC1",8
GO:0007033,"GO:0007033","vacuole organization","4/304","174/18866",0.308318206029205,0.308318206029205,0.52688719563751,"ATG16L2/ATG5/ATP13A2/RAB33B",4
GO:0051047,"GO:0051047","positive regulation of secretion","7/304","340/18866",0.309160926660038,0.309160926660038,0.52688719563751,"ATG5/ATP13A2/CREB1/EDN1/IRS2/SPP1/UNC13A",7
GO:0007613,"GO:0007613","memory","3/304","121/18866",0.309549328869784,0.309549328869784,0.52688719563751,"CAMK4/CREB1/LDLR",3
GO:0051282,"GO:0051282","regulation of sequestering of calcium ion","3/304","121/18866",0.309549328869784,0.309549328869784,0.52688719563751,"ATG5/ERO1A/TRPC1",3
GO:0006879,"GO:0006879","cellular iron ion homeostasis","2/304","70/18866",0.31164270998488,0.31164270998488,0.52688719563751,"ATP13A2/SLC40A1",2
GO:0035082,"GO:0035082","axoneme assembly","2/304","70/18866",0.31164270998488,0.31164270998488,0.52688719563751,"RSPH4A/SPAG1",2
GO:0043967,"GO:0043967","histone H4 acetylation","2/304","70/18866",0.31164270998488,0.31164270998488,0.52688719563751,"ACTL6A/ATG5",2
GO:0019058,"GO:0019058","viral life cycle","7/304","341/18866",0.311728969562939,0.311728969562939,0.52688719563751,"ATG16L2/ATG5/CXADR/LDLR/PDE12/PRKN/TRIM6",7
GO:0000715,"GO:0000715","nucleotide-excision repair, DNA damage recognition","1/304","23/18866",0.311921291962102,0.311921291962102,0.52688719563751,"CETN2",1
GO:0001956,"GO:0001956","positive regulation of neurotransmitter secretion","1/304","23/18866",0.311921291962102,0.311921291962102,0.52688719563751,"UNC13A",1
GO:0006359,"GO:0006359","regulation of transcription by RNA polymerase III","1/304","23/18866",0.311921291962102,0.311921291962102,0.52688719563751,"NAB2",1
GO:0006582,"GO:0006582","melanin metabolic process","1/304","23/18866",0.311921291962102,0.311921291962102,0.52688719563751,"TRPC1",1
GO:0006590,"GO:0006590","thyroid hormone generation","1/304","23/18866",0.311921291962102,0.311921291962102,0.52688719563751,"MED1",1
GO:0006783,"GO:0006783","heme biosynthetic process","1/304","23/18866",0.311921291962102,0.311921291962102,0.52688719563751,"PPOX",1
GO:0007097,"GO:0007097","nuclear migration","1/304","23/18866",0.311921291962102,0.311921291962102,0.52688719563751,"FBXW11",1
GO:0007289,"GO:0007289","spermatid nucleus differentiation","1/304","23/18866",0.311921291962102,0.311921291962102,0.52688719563751,"TBPL1",1
GO:0010226,"GO:0010226","response to lithium ion","1/304","23/18866",0.311921291962102,0.311921291962102,0.52688719563751,"ADCY7",1
GO:0010288,"GO:0010288","response to lead ion","1/304","23/18866",0.311921291962102,0.311921291962102,0.52688719563751,"BACE1",1
GO:0010866,"GO:0010866","regulation of triglyceride biosynthetic process","1/304","23/18866",0.311921291962102,0.311921291962102,0.52688719563751,"LDLR",1
GO:0015813,"GO:0015813","L-glutamate transmembrane transport","1/304","23/18866",0.311921291962102,0.311921291962102,0.52688719563751,"SLC25A13",1
GO:0016338,"GO:0016338","calcium-independent cell-cell adhesion via plasma membrane cell-adhesion molecules","1/304","23/18866",0.311921291962102,0.311921291962102,0.52688719563751,"CLDN3",1
GO:0030539,"GO:0030539","male genitalia development","1/304","23/18866",0.311921291962102,0.311921291962102,0.52688719563751,"GREB1L",1
GO:0031629,"GO:0031629","synaptic vesicle fusion to presynaptic active zone membrane","1/304","23/18866",0.311921291962102,0.311921291962102,0.52688719563751,"VAMP1",1
GO:0035162,"GO:0035162","embryonic hemopoiesis","1/304","23/18866",0.311921291962102,0.311921291962102,0.52688719563751,"MED1",1
GO:0035812,"GO:0035812","renal sodium excretion","1/304","23/18866",0.311921291962102,0.311921291962102,0.52688719563751,"EDN1",1
GO:0042401,"GO:0042401","cellular biogenic amine biosynthetic process","1/304","23/18866",0.311921291962102,0.311921291962102,0.52688719563751,"MOXD1",1
GO:0042451,"GO:0042451","purine nucleoside biosynthetic process","1/304","23/18866",0.311921291962102,0.311921291962102,0.52688719563751,"NME9",1
GO:0042455,"GO:0042455","ribonucleoside biosynthetic process","1/304","23/18866",0.311921291962102,0.311921291962102,0.52688719563751,"NME9",1
[truncated: 1,727 more rows]

## Sheet: steelblue
,"ID","Description","GeneRatio","BgRatio","pvalue","p.adjust","qvalue","geneID","Count"
GO:0045738,"GO:0045738","negative regulation of DNA repair","5/163","36/18866",1.37442093043907e-05,1.37442093043907e-05,0.0362557773861084,"AUNIP/ERCC6/FANCB/KLHL15/RPS3",5
GO:0016579,"GO:0016579","protein deubiquitination","10/163","283/18866",0.000180621346732043,0.000180621346732043,0.0817163240517488,"ADRM1/JOSD1/OTUD4/PSMA4/SMAD2/SNX3/USP10/USP36/USP43/YOD1",10
GO:0019058,"GO:0019058","viral life cycle","11/163","341/18866",0.000190662870606908,0.000190662870606908,0.0817163240517488,"CTBP2/CXADR/DDX3X/FURIN/ILF3/ISG20/ITGA2/PCBP1/PPID/SNX3/VPS4B",11
GO:0000724,"GO:0000724","double-strand break repair via homologous recombination","7/163","138/18866",0.000198460813852525,0.000198460813852525,0.0817163240517488,"AP5S1/AUNIP/ERCC6/FANCB/FANCM/KLHL15/MMS22L",7
GO:2000780,"GO:2000780","negative regulation of double-strand break repair","4/163","34/18866",0.000203475514267774,0.000203475514267774,0.0817163240517488,"AUNIP/ERCC6/FANCB/KLHL15",4
GO:0071902,"GO:0071902","positive regulation of protein serine/threonine kinase activity","11/163","345/18866",0.000210855888574409,0.000210855888574409,0.0817163240517488,"BRAF/CCNT1/CCNYL1/DDX3X/ERCC6/MAP3K1/RALB/RAPGEF2/RPS3/TGFA/THBS1",11
GO:0000725,"GO:0000725","recombinational repair","7/163","140/18866",0.000216844993992071,0.000216844993992071,0.0817163240517488,"AP5S1/AUNIP/ERCC6/FANCB/FANCM/KLHL15/MMS22L",7
GO:0071634,"GO:0071634","regulation of transforming growth factor beta production","4/163","36/18866",0.000254998650224302,0.000254998650224302,0.0831682669769373,"CDH3/CREB1/FURIN/THBS1",4
GO:0070646,"GO:0070646","protein modification by small protein removal","10/163","300/18866",0.000288303458203396,0.000288303458203396,0.0831682669769373,"ADRM1/JOSD1/OTUD4/PSMA4/SMAD2/SNX3/USP10/USP36/USP43/YOD1",10
GO:0071604,"GO:0071604","transforming growth factor beta production","4/163","38/18866",0.000315282735946091,0.000315282735946091,0.0831682669769373,"CDH3/CREB1/FURIN/THBS1",4
GO:0071636,"GO:0071636","positive regulation of transforming growth factor beta production","3/163","20/18866",0.000647875288263833,0.000647875288263833,0.155366073912839,"CREB1/FURIN/THBS1",3
GO:2001021,"GO:2001021","negative regulation of response to DNA damage stimulus","5/163","83/18866",0.000763810523383857,0.000763810523383857,0.156241557408402,"AUNIP/ERCC6/FANCB/KLHL15/RPS3",5
GO:0019079,"GO:0019079","viral genome replication","6/163","127/18866",0.00082921496948593,0.00082921496948593,0.156241557408402,"CTBP2/DDX3X/ILF3/ISG20/PCBP1/PPID",6
GO:0051053,"GO:0051053","negative regulation of DNA metabolic process","6/163","127/18866",0.00082921496948593,0.00082921496948593,0.156241557408402,"AUNIP/DCP2/ERCC6/FANCB/KLHL15/RPS3",6
GO:0051098,"GO:0051098","regulation of binding","10/163","367/18866",0.00136123170104341,0.00136123170104341,0.239385729320336,"ARHGAP28/CTBP2/DPH3/DVL1/ITGA2/LIF/MAU2/RALB/RAPGEF2/SMAD2",10
GO:0010717,"GO:0010717","regulation of epithelial to mesenchymal transition","5/163","99/18866",0.00168480776002476,0.00168480776002476,0.277771595172502,"EFNA1/OVOL2/PHLDB2/SMAD2/USF3",5
GO:0001837,"GO:0001837","epithelial to mesenchymal transition","6/163","152/18866",0.00208481822836821,0.00208481822836821,0.317406008825137,"EFNA1/KBTBD8/OVOL2/PHLDB2/SMAD2/USF3",6
GO:0010758,"GO:0010758","regulation of macrophage chemotaxis","3/163","30/18866",0.00216585903867113,0.00216585903867113,0.317406008825137,"MTUS1/RARRES2/THBS1",3
GO:1903900,"GO:1903900","regulation of viral life cycle","6/163","157/18866",0.0024520778570576,0.0024520778570576,0.340438067024174,"DDX3X/ILF3/ISG20/PPID/SNX3/VPS4B",6
GO:0050792,"GO:0050792","regulation of viral process","7/163","217/18866",0.00283662883993822,0.00283662883993822,0.374136414362378,"CCNT1/DDX3X/ILF3/ISG20/PPID/SNX3/VPS4B",7
GO:0032908,"GO:0032908","regulation of transforming growth factor beta1 production","2/163","11/18866",0.00387691401049734,0.00387691401049734,0.38357319540245,"FURIN/THBS1",2
GO:0043455,"GO:0043455","regulation of secondary metabolic process","2/163","11/18866",0.00387691401049734,0.00387691401049734,0.38357319540245,"CDH3/RAPGEF2",2
GO:0046607,"GO:0046607","positive regulation of centrosome cycle","2/163","11/18866",0.00387691401049734,0.00387691401049734,0.38357319540245,"PLK4/VPS4B",2
GO:0048021,"GO:0048021","regulation of melanin biosynthetic process","2/163","11/18866",0.00387691401049734,0.00387691401049734,0.38357319540245,"CDH3/RAPGEF2",2
GO:1900376,"GO:1900376","regulation of secondary metabolite biosynthetic process","2/163","11/18866",0.00387691401049734,0.00387691401049734,0.38357319540245,"CDH3/RAPGEF2",2
GO:1905168,"GO:1905168","positive regulation of double-strand break repair via homologous recombination","2/163","11/18866",0.00387691401049734,0.00387691401049734,0.38357319540245,"ERCC6/FANCB",2
GO:0043903,"GO:0043903","regulation of symbiotic process","7/163","231/18866",0.00400085776059157,0.00400085776059157,0.38357319540245,"CCNT1/DDX3X/ILF3/ISG20/PPID/SNX3/VPS4B",7
GO:0051099,"GO:0051099","positive regulation of binding","6/163","174/18866",0.00407144732550086,0.00407144732550086,0.38357319540245,"CTBP2/DPH3/ITGA2/MAU2/RALB/RAPGEF2",6
GO:0032905,"GO:0032905","transforming growth factor beta1 production","2/163","12/18866",0.00462598780551761,0.00462598780551761,0.406762296162355,"FURIN/THBS1",2
GO:2001214,"GO:2001214","positive regulation of vasculogenesis","2/163","12/18866",0.00462598780551761,0.00462598780551761,0.406762296162355,"ADM/RAPGEF2",2
GO:0010719,"GO:0010719","negative regulation of epithelial to mesenchymal transition","3/163","40/18866",0.00494869424422808,0.00494869424422808,0.407941703159065,"EFNA1/OVOL2/USF3",3
GO:0098534,"GO:0098534","centriole assembly","3/163","40/18866",0.00494869424422808,0.00494869424422808,0.407941703159065,"CCDC78/PLK4/VPS4B",3
GO:0007183,"GO:0007183","SMAD protein complex assembly","2/163","13/18866",0.00543618114478378,0.00543618114478378,0.408443442607847,"EID2/SMAD2",2
GO:0060100,"GO:0060100","positive regulation of phagocytosis, engulfment","2/163","13/18866",0.00543618114478378,0.00543618114478378,0.408443442607847,"ABCA7/ITGA2",2
GO:1905155,"GO:1905155","positive regulation of membrane invagination","2/163","13/18866",0.00543618114478378,0.00543618114478378,0.408443442607847,"ABCA7/ITGA2",2
GO:0048246,"GO:0048246","macrophage chemotaxis","3/163","42/18866",0.00567825735783825,0.00567825735783825,0.408443442607847,"MTUS1/RARRES2/THBS1",3
GO:0006282,"GO:0006282","regulation of DNA repair","5/163","132/18866",0.00580822068240832,0.00580822068240832,0.408443442607847,"AUNIP/ERCC6/FANCB/KLHL15/RPS3",5
GO:0060707,"GO:0060707","trophoblast giant cell differentiation","2/163","14/18866",0.00630639517203108,0.00630639517203108,0.408443442607847,"LIF/PLK4",2
GO:2000779,"GO:2000779","regulation of double-strand break repair","4/163","85/18866",0.00632143103779415,0.00632143103779415,0.408443442607847,"AUNIP/ERCC6/FANCB/KLHL15",4
GO:0090503,"GO:0090503","RNA phosphodiester bond hydrolysis, exonucleolytic","3/163","44/18866",0.00646898931751318,0.00646898931751318,0.408443442607847,"DCP2/EXOSC9/ISG20",3
GO:1905521,"GO:1905521","regulation of macrophage migration","3/163","44/18866",0.00646898931751318,0.00646898931751318,0.408443442607847,"MTUS1/RARRES2/THBS1",3
GO:0031023,"GO:0031023","microtubule organizing center organization","5/163","136/18866",0.00657607566715347,0.00657607566715347,0.408443442607847,"CCDC78/HAUS3/PLK4/SSX2IP/VPS4B",5
GO:0000086,"GO:0000086","G2/M transition of mitotic cell cycle","7/163","254/18866",0.00665798668417021,0.00665798668417021,0.408443442607847,"ARPP19/BACH1/HAUS3/KAT14/PLK4/PSMA4/VPS4B",7
GO:0010828,"GO:0010828","positive regulation of glucose transmembrane transport","3/163","45/18866",0.00688768718834339,0.00688768718834339,0.412931676889678,"ARPP19/BRAF/KLF15",3
GO:0060099,"GO:0060099","regulation of phagocytosis, engulfment","2/163","15/18866",0.00723554525349933,0.00723554525349933,0.424146816497528,"ABCA7/ITGA2",2
GO:0001892,"GO:0001892","embryonic placenta development","4/163","89/18866",0.00742356432406282,0.00742356432406282,0.425299017679763,"ADM/LIF/OVOL2/PLK4",4
GO:0010569,"GO:0010569","regulation of double-strand break repair via homologous recombination","3/163","47/18866",0.00777246786198074,0.00777246786198074,0.425299017679763,"ERCC6/FANCB/KLHL15",3
GO:0006302,"GO:0006302","double-strand break repair","7/163","262/18866",0.00783575254747839,0.00783575254747839,0.425299017679763,"AP5S1/AUNIP/ERCC6/FANCB/FANCM/KLHL15/MMS22L",7
GO:0050774,"GO:0050774","negative regulation of dendrite morphogenesis","2/163","16/18866",0.00822256081667378,0.00822256081667378,0.425299017679763,"EFNA1/RAPGEF2",2
GO:1905153,"GO:1905153","regulation of membrane invagination","2/163","16/18866",0.00822256081667378,0.00822256081667378,0.425299017679763,"ABCA7/ITGA2",2
GO:2001212,"GO:2001212","regulation of vasculogenesis","2/163","16/18866",0.00822256081667378,0.00822256081667378,0.425299017679763,"ADM/RAPGEF2",2
GO:0033135,"GO:0033135","regulation of peptidyl-serine phosphorylation","5/163","145/18866",0.00855891873114354,0.00855891873114354,0.434183205268132,"BRAF/DDIT4/DOCK7/IL11/LIF",5
GO:0043547,"GO:0043547","positive regulation of GTPase activity","9/163","406/18866",0.00888240849071655,0.00888240849071655,0.442091671851751,"ARHGAP28/ARHGAP33/DOCK7/PLEKHG6/RAPGEF2/RASA2/RIN1/TBC1D8/ZC3H15",9
GO:0044839,"GO:0044839","cell cycle G2/M phase transition","7/163","273/18866",0.00969799073734022,0.00969799073734022,0.463819828725247,"ARPP19/BACH1/HAUS3/KAT14/PLK4/PSMA4/VPS4B",7
GO:0000186,"GO:0000186","activation of MAPKK activity","3/163","52/18866",0.0102667234023683,0.0102667234023683,0.463819828725247,"BRAF/ERCC6/MAP3K1",3
GO:0043652,"GO:0043652","engulfment of apoptotic cell","2/163","18/18866",0.010365975448623,0.010365975448623,0.463819828725247,"ABCA7/THBS1",2
GO:0051895,"GO:0051895","negative regulation of focal adhesion assembly","2/163","18/18866",0.010365975448623,0.010365975448623,0.463819828725247,"PHLDB2/THBS1",2
GO:0150118,"GO:0150118","negative regulation of cell-substrate junction organization","2/163","18/18866",0.010365975448623,0.010365975448623,0.463819828725247,"PHLDB2/THBS1",2
GO:0051701,"GO:0051701","interaction with host","6/163","212/18866",0.0103739430965882,0.0103739430965882,0.463819828725247,"CXADR/ITGA2/PPID/SERPINB9/SNX3/VPS4B",6
GO:0008333,"GO:0008333","endosome to lysosome transport","3/163","53/18866",0.0108148556388397,0.0108148556388397,0.473184545536208,"EPG5/VPS39/VPS4B",3
GO:0045069,"GO:0045069","regulation of viral genome replication","4/163","100/18866",0.0110863820947353,0.0110863820947353,0.473184545536208,"DDX3X/ILF3/ISG20/PPID",4
GO:0010759,"GO:0010759","positive regulation of macrophage chemotaxis","2/163","19/18866",0.0115203022509315,0.0115203022509315,0.473184545536208,"RARRES2/THBS1",2
GO:2000042,"GO:2000042","negative regulation of double-strand break repair via homologous recombination","2/163","19/18866",0.0115203022509315,0.0115203022509315,0.473184545536208,"FANCB/KLHL15",2
GO:0000079,"GO:0000079","regulation of cyclin-dependent protein serine/threonine kinase activity","4/163","102/18866",0.0118572870429752,0.0118572870429752,0.473184545536208,"CCNE2/CCNT1/CCNYL1/HERC5",4
GO:0060039,"GO:0060039","pericardium development","2/163","20/18866",0.0127283496912279,0.0127283496912279,0.473184545536208,"DLL4/SMAD2",2
GO:0007178,"GO:0007178","transmembrane receptor protein serine/threonine kinase signaling pathway","8/163","359/18866",0.0129503799547941,0.0129503799547941,0.473184545536208,"CREB1/CTDSPL2/EID2/FURIN/GDF11/OVOL2/SMAD2/THBS1",8
GO:0046148,"GO:0046148","pigment biosynthetic process","3/163","57/18866",0.0131746949302268,0.0131746949302268,0.473184545536208,"CDH3/FECH/RAPGEF2",3
GO:1905517,"GO:1905517","macrophage migration","3/163","57/18866",0.0131746949302268,0.0131746949302268,0.473184545536208,"MTUS1/RARRES2/THBS1",3
GO:0052548,"GO:0052548","regulation of endopeptidase activity","9/163","434/18866",0.013301814776747,0.013301814776747,0.473184545536208,"ADRM1/CSTB/CTSH/DDX3X/EFNA1/FURIN/RPS3/SERPINB9/THBS1",9
GO:1904029,"GO:1904029","regulation of cyclin-dependent protein kinase activity","4/163","106/18866",0.0135004420857745,0.0135004420857745,0.473184545536208,"CCNE2/CCNT1/CCNYL1/HERC5",4
GO:0002011,"GO:0002011","morphogenesis of an epithelial sheet","3/163","58/18866",0.0138068533118027,0.0138068533118027,0.473184545536208,"DLL4/DVL1/PHLDB2",3
GO:0019369,"GO:0019369","arachidonic acid metabolic process","3/163","58/18866",0.0138068533118027,0.0138068533118027,0.473184545536208,"ALOXE3/FAAH2/PTGES3",3
GO:0031638,"GO:0031638","zymogen activation","3/163","58/18866",0.0138068533118027,0.0138068533118027,0.473184545536208,"CTSH/FURIN/THBS1",3
GO:0048524,"GO:0048524","positive regulation of viral process","4/163","107/18866",0.0139326935646238,0.0139326935646238,0.473184545536208,"CCNT1/DDX3X/PPID/VPS4B",4
GO:0016075,"GO:0016075","rRNA catabolic process","2/163","21/18866",0.0139891151431702,0.0139891151431702,0.473184545536208,"DEDD2/EXOSC9",2
GO:0051052,"GO:0051052","regulation of DNA metabolic process","8/163","365/18866",0.0141843596397446,0.0141843596397446,0.473184545536208,"AUNIP/DCP2/ERCC6/FANCB/KLHL15/OTUD4/PTGES3/RPS3",8
GO:0090501,"GO:0090501","RNA phosphodiester bond hydrolysis","5/163","165/18866",0.0143717233405627,0.0143717233405627,0.473184545536208,"DCP2/EXOSC9/ISG20/PCF11/ZC3H12C",5
GO:0031647,"GO:0031647","regulation of protein stability","7/163","296/18866",0.014607960699143,0.014607960699143,0.473184545536208,"CCDC88C/CREB1/CTSH/DVL1/EFNA1/PTGES3/USP36",7
GO:0048762,"GO:0048762","mesenchymal cell differentiation","6/163","229/18866",0.0147189939085537,0.0147189939085537,0.473184545536208,"EFNA1/KBTBD8/OVOL2/PHLDB2/SMAD2/USF3",6
GO:0033138,"GO:0033138","positive regulation of peptidyl-serine phosphorylation","4/163","109/18866",0.0148233494072529,0.0148233494072529,0.473184545536208,"BRAF/DOCK7/IL11/LIF",4
GO:0061098,"GO:0061098","positive regulation of protein tyrosine kinase activity","3/163","60/18866",0.0151222457545368,0.0151222457545368,0.473184545536208,"EFNA1/ERCC6/TGFA",3
GO:0045862,"GO:0045862","positive regulation of proteolysis","8/163","370/18866",0.0152765598731785,0.0152765598731785,0.473184545536208,"ADRM1/CTSH/DDX3X/DVL1/EFNA1/FBXO22/FURIN/RPS3",8
GO:0042438,"GO:0042438","melanin biosynthetic process","2/163","22/18866",0.0153016091091714,0.0153016091091714,0.473184545536208,"CDH3/RAPGEF2",2
GO:0006310,"GO:0006310","DNA recombination","7/163","299/18866",0.015358987540657,0.015358987540657,0.473184545536208,"AP5S1/AUNIP/ERCC6/FANCB/FANCM/KLHL15/MMS22L",7
GO:0052126,"GO:0052126","movement in host environment","5/163","169/18866",0.0157888127773198,0.0157888127773198,0.473184545536208,"CXADR/ITGA2/PPID/SNX3/VPS4B",5
GO:1903902,"GO:1903902","positive regulation of viral life cycle","3/163","61/18866",0.0158055822540351,0.0158055822540351,0.473184545536208,"DDX3X/PPID/VPS4B",3
GO:0060997,"GO:0060997","dendritic spine morphogenesis","3/163","62/18866",0.016506071531609,0.016506071531609,0.473184545536208,"ARHGAP33/DVL1/EFNA1",3
GO:0006582,"GO:0006582","melanin metabolic process","2/163","23/18866",0.0166648550706739,0.0166648550706739,0.473184545536208,"CDH3/RAPGEF2",2
GO:0007097,"GO:0007097","nuclear migration","2/163","23/18866",0.0166648550706739,0.0166648550706739,0.473184545536208,"DOCK7/SUN2",2
GO:0036119,"GO:0036119","response to platelet-derived growth factor","2/163","23/18866",0.0166648550706739,0.0166648550706739,0.473184545536208,"CREB1/FER",2
GO:0046599,"GO:0046599","regulation of centriole replication","2/163","23/18866",0.0166648550706739,0.0166648550706739,0.473184545536208,"PLK4/VPS4B",2
GO:1902001,"GO:1902001","fatty acid transmembrane transport","2/163","23/18866",0.0166648550706739,0.0166648550706739,0.473184545536208,"ABCD3/THBS1",2
GO:0048568,"GO:0048568","embryonic organ development","9/163","451/18866",0.0166823043089082,0.0166823043089082,0.473184545536208,"ADM/DVL1/EFNA1/LIF/OVOL2/PLK4/RARRES2/SMAD2/TEAD4",9
GO:0031122,"GO:0031122","cytoplasmic microtubule organization","3/163","63/18866",0.0172237514309633,0.0172237514309633,0.483345140940582,"CCDC88C/DVL1/VPS4B",3
GO:0021511,"GO:0021511","spinal cord patterning","2/163","24/18866",0.0180778893400051,0.0180778893400051,0.4938952274064,"DLL4/GDF11",2
GO:0044550,"GO:0044550","secondary metabolite biosynthetic process","2/163","24/18866",0.0180778893400051,0.0180778893400051,0.4938952274064,"CDH3/RAPGEF2",2
GO:0006354,"GO:0006354","DNA-templated transcription, elongation","4/163","116/18866",0.0182207135629383,0.0182207135629383,0.4938952274064,"ADRM1/CCNT1/ERCC6/POLR1G",4
GO:0016236,"GO:0016236","macroautophagy","7/163","310/18866",0.01834862157683,0.01834862157683,0.4938952274064,"EPG5/RAB19/RALB/RHEB/USP36/VPS4B/YOD1",7
GO:0052547,"GO:0052547","regulation of peptidase activity","9/163","466/18866",0.0201551411612361,0.0201551411612361,0.501977454081458,"ADRM1/CSTB/CTSH/DDX3X/EFNA1/FURIN/RPS3/SERPINB9/THBS1",9
GO:0022406,"GO:0022406","membrane docking","5/163","180/18866",0.0201585776406066,0.0201585776406066,0.501977454081458,"CTBP2/HAUS3/PLK4/RALB/SNX3",5
GO:0010950,"GO:0010950","positive regulation of endopeptidase activity","5/163","181/18866",0.0205912550000119,0.0205912550000119,0.501977454081458,"ADRM1/CTSH/DDX3X/EFNA1/RPS3",5
GO:1905330,"GO:1905330","regulation of morphogenesis of an epithelium","5/163","181/18866",0.0205912550000119,0.0205912550000119,0.501977454081458,"DAAM1/DVL1/LIF/PHLDB2/PSMA4",5
GO:0043543,"GO:0043543","protein acylation","6/163","248/18866",0.020918741453416,0.020918741453416,0.501977454081458,"DDX3X/KANSL2/KAT14/KLF15/LIF/ZDHHC21",6
GO:0120254,"GO:0120254","olefinic compound metabolic process","4/163","121/18866",0.0209207018656219,0.0209207018656219,0.501977454081458,"ADM/ALOXE3/FAAH2/PTGES3",4
GO:0021884,"GO:0021884","forebrain neuron development","2/163","26/18866",0.0210495313279718,0.0210495313279718,0.501977454081458,"DCLK2/RAPGEF2",2
GO:0060706,"GO:0060706","cell differentiation involved in embryonic placenta development","2/163","26/18866",0.0210495313279718,0.0210495313279718,0.501977454081458,"LIF/PLK4",2
GO:1905523,"GO:1905523","positive regulation of macrophage migration","2/163","26/18866",0.0210495313279718,0.0210495313279718,0.501977454081458,"RARRES2/THBS1",2
GO:0007051,"GO:0007051","spindle organization","5/163","183/18866",0.0214747483852348,0.0214747483852348,0.501977454081458,"AUNIP/HAUS3/RPS3/SUN2/VPS4B",5
GO:0071560,"GO:0071560","cellular response to transforming growth factor beta stimulus","6/163","252/18866",0.0224193334874217,0.0224193334874217,0.501977454081458,"CREB1/EID2/FURIN/OVOL2/SMAD2/THBS1",6
GO:0032786,"GO:0032786","positive regulation of DNA-templated transcription, elongation","2/163","27/18866",0.0226062745142231,0.0226062745142231,0.501977454081458,"CCNT1/ERCC6",2
GO:0090092,"GO:0090092","regulation of transmembrane receptor protein serine/threonine kinase signaling pathway","6/163","254/18866",0.0231962034951917,0.0231962034951917,0.501977454081458,"CTDSPL2/EID2/GDF11/OVOL2/SMAD2/THBS1",6
GO:0007098,"GO:0007098","centrosome cycle","4/163","125/18866",0.0232485871627694,0.0232485871627694,0.501977454081458,"HAUS3/PLK4/SSX2IP/VPS4B",4
GO:0050821,"GO:0050821","protein stabilization","5/163","187/18866",0.023315078215215,0.023315078215215,0.501977454081458,"CREB1/DVL1/EFNA1/PTGES3/USP36",5
GO:0033627,"GO:0033627","cell adhesion mediated by integrin","3/163","71/18866",0.0235869475608912,0.0235869475608912,0.501977454081458,"EFNA1/ITGA2/LIF",3
GO:0045739,"GO:0045739","positive regulation of DNA repair","3/163","71/18866",0.0235869475608912,0.0235869475608912,0.501977454081458,"ERCC6/FANCB/RPS3",3
GO:0001667,"GO:0001667","ameboidal-type cell migration","9/163","481/18866",0.0241244718105995,0.0241244718105995,0.501977454081458,"CTSH/DLL4/EFNA1/FAT2/FER/ITGA2/MIA3/OVOL2/THBS1",9
GO:0043087,"GO:0043087","regulation of GTPase activity","9/163","481/18866",0.0241244718105995,0.0241244718105995,0.501977454081458,"ARHGAP28/ARHGAP33/DOCK7/PLEKHG6/RAPGEF2/RASA2/RIN1/TBC1D8/ZC3H15",9
GO:0003180,"GO:0003180","aortic valve morphogenesis","2/163","28/18866",0.0242090766580689,0.0242090766580689,0.501977454081458,"DLL4/EFNA1",2
GO:0044331,"GO:0044331","cell-cell adhesion mediated by cadherin","2/163","28/18866",0.0242090766580689,0.0242090766580689,0.501977454081458,"FER/PLEKHA7",2
GO:0051647,"GO:0051647","nucleus localization","2/163","28/18866",0.0242090766580689,0.0242090766580689,0.501977454081458,"DOCK7/SUN2",2
GO:1903588,"GO:1903588","negative regulation of blood vessel endothelial cell proliferation involved in sprouting angiogenesis","2/163","28/18866",0.0242090766580689,0.0242090766580689,0.501977454081458,"DLL4/THBS1",2
GO:2000171,"GO:2000171","negative regulation of dendrite development","2/163","28/18866",0.0242090766580689,0.0242090766580689,0.501977454081458,"EFNA1/RAPGEF2",2
GO:0042440,"GO:0042440","pigment metabolic process","3/163","72/18866",0.0244602333448731,0.0244602333448731,0.501977454081458,"CDH3/FECH/RAPGEF2",3
GO:0071559,"GO:0071559","response to transforming growth factor beta","6/163","258/18866",0.024803897372088,0.024803897372088,0.501977454081458,"CREB1/EID2/FURIN/OVOL2/SMAD2/THBS1",6
GO:0007517,"GO:0007517","muscle organ development","8/163","407/18866",0.0253323447236394,0.0253323447236394,0.501977454081458,"CD164/CREB1/CXADR/DLL4/EID2/FBXO22/LIF/TEAD4",8
GO:1902117,"GO:1902117","positive regulation of organelle assembly","3/163","73/18866",0.0253508231421547,0.0253508231421547,0.501977454081458,"PLK4/RALB/VPS4B",3
GO:2001032,"GO:2001032","regulation of double-strand break repair via nonhomologous end joining","2/163","29/18866",0.0258570360583689,0.0258570360583689,0.501977454081458,"AUNIP/ERCC6",2
GO:1901983,"GO:1901983","regulation of protein acetylation","3/163","75/18866",0.0271838592745603,0.0271838592745603,0.501977454081458,"DDX3X/KLF15/LIF",3
GO:0050731,"GO:0050731","positive regulation of peptidyl-tyrosine phosphorylation","5/163","195/18866",0.0272949862257022,0.0272949862257022,0.501977454081458,"EFNA1/ERCC6/IL11/LIF/TGFA",5
GO:0043406,"GO:0043406","positive regulation of MAP kinase activity","6/163","264/18866",0.0273526248240741,0.0273526248240741,0.501977454081458,"BRAF/ERCC6/MAP3K1/RPS3/TGFA/THBS1",6
GO:0006362,"GO:0006362","transcription elongation from RNA polymerase I promoter","2/163","30/18866",0.0275492629883473,0.0275492629883473,0.501977454081458,"ERCC6/POLR1G",2
GO:0042177,"GO:0042177","negative regulation of protein catabolic process","4/163","133/18866",0.0283609672426612,0.0283609672426612,0.501977454081458,"EFNA1/FURIN/SNX3/YOD1",4
GO:0045737,"GO:0045737","positive regulation of cyclin-dependent protein serine/threonine kinase activity","2/163","31/18866",0.0292848795580861,0.0292848795580861,0.501977454081458,"CCNT1/CCNYL1",2
GO:0050686,"GO:0050686","negative regulation of mRNA processing","2/163","31/18866",0.0292848795580861,0.0292848795580861,0.501977454081458,"CCNT1/SRSF10",2
GO:0051497,"GO:0051497","negative regulation of stress fiber assembly","2/163","31/18866",0.0292848795580861,0.0292848795580861,0.501977454081458,"ARHGAP28/PHLDB2",2
GO:0060261,"GO:0060261","positive regulation of transcription initiation from RNA polymerase II promoter","2/163","31/18866",0.0292848795580861,0.0292848795580861,0.501977454081458,"CREB1/ERCC6",2
GO:0071549,"GO:0071549","cellular response to dexamethasone stimulus","2/163","31/18866",0.0292848795580861,0.0292848795580861,0.501977454081458,"DDIT4/FECH",2
GO:0051054,"GO:0051054","positive regulation of DNA metabolic process","5/163","200/18866",0.0299894199582868,0.0299894199582868,0.501977454081458,"ERCC6/FANCB/OTUD4/PTGES3/RPS3",5
GO:0000288,"GO:0000288","nuclear-transcribed mRNA catabolic process, deadenylation-dependent decay","3/163","78/18866",0.0300627434661712,0.0300627434661712,0.501977454081458,"DCP2/EXOSC9/RC3H1",3
GO:0060395,"GO:0060395","SMAD protein signal transduction","3/163","78/18866",0.0300627434661712,0.0300627434661712,0.501977454081458,"GDF11/OVOL2/SMAD2",3
GO:0010952,"GO:0010952","positive regulation of peptidase activity","5/163","201/18866",0.0305477129203893,0.0305477129203893,0.501977454081458,"ADRM1/CTSH/DDX3X/EFNA1/RPS3",5
GO:0010827,"GO:0010827","regulation of glucose transmembrane transport","3/163","79/18866",0.0310567500072228,0.0310567500072228,0.501977454081458,"ARPP19/BRAF/KLF15",3
GO:0031016,"GO:0031016","pancreas development","3/163","79/18866",0.0310567500072228,0.0310567500072228,0.501977454081458,"GDF11/RHEB/SMAD2",3
GO:0003176,"GO:0003176","aortic valve development","2/163","32/18866",0.0310630195784779,0.0310630195784779,0.501977454081458,"DLL4/EFNA1",2
GO:1901889,"GO:1901889","negative regulation of cell junction assembly","2/163","32/18866",0.0310630195784779,0.0310630195784779,0.501977454081458,"PHLDB2/THBS1",2
GO:0007179,"GO:0007179","transforming growth factor beta receptor signaling pathway","5/163","202/18866",0.0311125198482493,0.0311125198482493,0.501977454081458,"CREB1/EID2/FURIN/SMAD2/THBS1",5
GO:0006473,"GO:0006473","protein acetylation","5/163","203/18866",0.0316838590534739,0.0316838590534739,0.501977454081458,"DDX3X/KANSL2/KAT14/KLF15/LIF",5
GO:1901224,"GO:1901224","positive regulation of NIK/NF-kappaB signaling","3/163","80/18866",0.0320678895333618,0.0320678895333618,0.501977454081458,"DDX3X/RC3H1/RPS3",3
GO:0034331,"GO:0034331","cell junction maintenance","2/163","33/18866",0.0328828284266229,0.0328828284266229,0.501977454081458,"CTBP2/PLEKHA7",2
GO:0043928,"GO:0043928","exonucleolytic catabolism of deadenylated mRNA","2/163","33/18866",0.0328828284266229,0.0328828284266229,0.501977454081458,"DCP2/EXOSC9",2
GO:0120255,"GO:0120255","olefinic compound biosynthetic process","2/163","33/18866",0.0328828284266229,0.0328828284266229,0.501977454081458,"ADM/ALOXE3",2
GO:1902003,"GO:1902003","regulation of amyloid-beta formation","2/163","33/18866",0.0328828284266229,0.0328828284266229,0.501977454081458,"ABCA7/EFNA1",2
GO:0010762,"GO:0010762","regulation of fibroblast migration","2/163","34/18866",0.0347434629126556,0.0347434629126556,0.501977454081458,"FER/THBS1",2
GO:0018149,"GO:0018149","peptide cross-linking","2/163","34/18866",0.0347434629126556,0.0347434629126556,0.501977454081458,"ABCA7/THBS1",2
GO:0019076,"GO:0019076","viral release from host cell","2/163","34/18866",0.0347434629126556,0.0347434629126556,0.501977454081458,"PPID/VPS4B",2
GO:0032232,"GO:0032232","negative regulation of actin filament bundle assembly","2/163","34/18866",0.0347434629126556,0.0347434629126556,0.501977454081458,"ARHGAP28/PHLDB2",2
GO:0035890,"GO:0035890","exit from host","2/163","34/18866",0.0347434629126556,0.0347434629126556,0.501977454081458,"PPID/VPS4B",2
GO:0035891,"GO:0035891","exit from host cell","2/163","34/18866",0.0347434629126556,0.0347434629126556,0.501977454081458,"PPID/VPS4B",2
GO:0046685,"GO:0046685","response to arsenic-containing substance","2/163","34/18866",0.0347434629126556,0.0347434629126556,0.501977454081458,"DDX3X/FECH",2
GO:0048566,"GO:0048566","embryonic digestive tract development","2/163","34/18866",0.0347434629126556,0.0347434629126556,0.501977454081458,"OVOL2/RARRES2",2
GO:0061384,"GO:0061384","heart trabecula morphogenesis","2/163","34/18866",0.0347434629126556,0.0347434629126556,0.501977454081458,"DLL4/OVOL2",2
GO:0002687,"GO:0002687","positive regulation of leukocyte migration","4/163","142/18866",0.0348530249150407,0.0348530249150407,0.501977454081458,"ITGA2/MIA3/RARRES2/THBS1",4
GO:0072073,"GO:0072073","kidney epithelium development","4/163","142/18866",0.0348530249150407,0.0348530249150407,0.501977454081458,"GDF11/KLF15/LIF/SMAD2",4
GO:0048041,"GO:0048041","focal adhesion assembly","3/163","83/18866",0.0352036991686367,0.0352036991686367,0.501977454081458,"ITGA2/PHLDB2/THBS1",3
GO:0010324,"GO:0010324","membrane invagination","4/163","143/18866",0.0356232825775615,0.0356232825775615,0.501977454081458,"ABCA7/ITGA2/SNX3/THBS1",4
GO:0097061,"GO:0097061","dendritic spine organization","3/163","84/18866",0.0362829472100216,0.0362829472100216,0.501977454081458,"ARHGAP33/DVL1/EFNA1",3
GO:0001822,"GO:0001822","kidney development","6/163","283/18866",0.036549195113918,0.036549195113918,0.501977454081458,"CTSH/GDF11/KLF15/LIF/RRM2B/SMAD2",6
GO:0000291,"GO:0000291","nuclear-transcribed mRNA catabolic process, exonucleolytic","2/163","35/18866",0.0366440911479875,0.0366440911479875,0.501977454081458,"DCP2/EXOSC9",2
GO:0031297,"GO:0031297","replication fork processing","2/163","35/18866",0.0366440911479875,0.0366440911479875,0.501977454081458,"FANCM/MMS22L",2
GO:0070536,"GO:0070536","protein K63-linked deubiquitination","2/163","35/18866",0.0366440911479875,0.0366440911479875,0.501977454081458,"OTUD4/YOD1",2
GO:1904031,"GO:1904031","positive regulation of cyclin-dependent protein kinase activity","2/163","35/18866",0.0366440911479875,0.0366440911479875,0.501977454081458,"CCNT1/CCNYL1",2
GO:0001666,"GO:0001666","response to hypoxia","7/163","359/18866",0.0366740767743484,0.0366740767743484,0.501977454081458,"ADM/BACH1/CREB1/DDIT4/ITGA2/PSMA4/THBS1",7
GO:0002685,"GO:0002685","regulation of leukocyte migration","5/163","212/18866",0.0371226197234459,0.0371226197234459,0.501977454081458,"ITGA2/MIA3/MTUS1/RARRES2/THBS1",5
GO:0043154,"GO:0043154","negative regulation of cysteine-type endopeptidase activity involved in apoptotic process","3/163","85/18866",0.0373791002407129,0.0373791002407129,0.501977454081458,"DDX3X/SERPINB9/THBS1",3
GO:0048813,"GO:0048813","dendrite morphogenesis","4/163","146/18866",0.0379930288250035,0.0379930288250035,0.501977454081458,"ARHGAP33/DVL1/EFNA1/RAPGEF2",4
GO:1903901,"GO:1903901","negative regulation of viral life cycle","3/163","86/18866",0.0384921031760574,0.0384921031760574,0.501977454081458,"ILF3/ISG20/SNX3",3
GO:0071108,"GO:0071108","protein K48-linked deubiquitination","2/163","36/18866",0.0385838924149497,0.0385838924149497,0.501977454081458,"OTUD4/YOD1",2
GO:2000781,"GO:2000781","positive regulation of double-strand break repair","2/163","36/18866",0.0385838924149497,0.0385838924149497,0.501977454081458,"ERCC6/FANCB",2
GO:0043281,"GO:0043281","regulation of cysteine-type endopeptidase activity involved in apoptotic process","5/163","215/18866",0.0390553786859817,0.0390553786859817,0.501977454081458,"CTSH/DDX3X/RPS3/SERPINB9/THBS1",5
GO:0010631,"GO:0010631","epithelial cell migration","7/163","365/18866",0.0395317480070183,0.0395317480070183,0.501977454081458,"CTSH/DLL4/EFNA1/FAT2/ITGA2/MIA3/THBS1",7
GO:1903363,"GO:1903363","negative regulation of cellular protein catabolic process","3/163","87/18866",0.0396218979554745,0.0396218979554745,0.501977454081458,"EFNA1/FURIN/YOD1",3
GO:0060485,"GO:0060485","mesenchyme development","6/163","290/18866",0.0403830982900092,0.0403830982900092,0.501977454081458,"EFNA1/KBTBD8/OVOL2/PHLDB2/SMAD2/USF3",6
GO:0097193,"GO:0097193","intrinsic apoptotic signaling pathway","6/163","290/18866",0.0403830982900092,0.0403830982900092,0.501977454081458,"DDIT4/DDX3X/DNAJC10/ERCC6/RPS3/RRM2B",6
GO:0007099,"GO:0007099","centriole replication","2/163","37/18866",0.0405620570378236,0.0405620570378236,0.501977454081458,"PLK4/VPS4B",2
GO:0045070,"GO:0045070","positive regulation of viral genome replication","2/163","37/18866",0.0405620570378236,0.0405620570378236,0.501977454081458,"DDX3X/PPID",2
GO:0060260,"GO:0060260","regulation of transcription initiation from RNA polymerase II promoter","2/163","37/18866",0.0405620570378236,0.0405620570378236,0.501977454081458,"CREB1/ERCC6",2
GO:1905314,"GO:1905314","semi-lunar valve development","2/163","37/18866",0.0405620570378236,0.0405620570378236,0.501977454081458,"DLL4/EFNA1",2
GO:0090132,"GO:0090132","epithelium migration","7/163","368/18866",0.0410138708094864,0.0410138708094864,0.501977454081458,"CTSH/DLL4/EFNA1/FAT2/ITGA2/MIA3/THBS1",7
GO:0045861,"GO:0045861","negative regulation of proteolysis","7/163","369/18866",0.0415158692402294,0.0415158692402294,0.501977454081458,"CSTB/DDX3X/EFNA1/FURIN/SERPINB9/THBS1/YOD1",7
GO:0072001,"GO:0072001","renal system development","6/163","292/18866",0.0415236308972841,0.0415236308972841,0.501977454081458,"CTSH/GDF11/KLF15/LIF/RRM2B/SMAD2",6
GO:0008625,"GO:0008625","extrinsic apoptotic signaling pathway via death domain receptors","3/163","89/18866",0.0419316163856332,0.0419316163856332,0.501977454081458,"DDX3X/DEDD2/THBS1",3
GO:0006417,"GO:0006417","regulation of translation","8/163","450/18866",0.0419801576637912,0.0419801576637912,0.501977454081458,"DDX3X/DPH3/ILF3/ITGA2/KBTBD8/RC3H1/RPS3/THBS1",8
GO:0006261,"GO:0006261","DNA-dependent DNA replication","4/163","151/18866",0.0421394839867116,0.0421394839867116,0.501977454081458,"CCNE2/FANCM/MMS22L/RRM2B",4
GO:0035567,"GO:0035567","non-canonical Wnt signaling pathway","4/163","151/18866",0.0421394839867116,0.0421394839867116,0.501977454081458,"CCDC88C/DAAM1/DVL1/PSMA4",4
GO:0036293,"GO:0036293","response to decreased oxygen levels","7/163","371/18866",0.0425318561402857,0.0425318561402857,0.501977454081458,"ADM/BACH1/CREB1/DDIT4/ITGA2/PSMA4/THBS1",7
GO:0034661,"GO:0034661","ncRNA catabolic process","2/163","38/18866",0.0425777862552437,0.0425777862552437,0.501977454081458,"DEDD2/EXOSC9",2
GO:2000144,"GO:2000144","positive regulation of DNA-templated transcription, initiation","2/163","38/18866",0.0425777862552437,0.0425777862552437,0.501977454081458,"CREB1/ERCC6",2
GO:0002224,"GO:0002224","toll-like receptor signaling pathway","4/163","152/18866",0.0429983253588204,0.0429983253588204,0.501977454081458,"DDX3X/EPG5/MAP3K1/OTUD4",4
GO:0090130,"GO:0090130","tissue migration","7/163","374/18866",0.0440859403909998,0.0440859403909998,0.501977454081458,"CTSH/DLL4/EFNA1/FAT2/ITGA2/MIA3/THBS1",7
GO:0001656,"GO:0001656","metanephros development","3/163","91/18866",0.0443077344244231,0.0443077344244231,0.501977454081458,"CTSH/GDF11/LIF",3
GO:0060021,"GO:0060021","roof of mouth development","3/163","91/18866",0.0443077344244231,0.0443077344244231,0.501977454081458,"CSRNP1/GDF11/SMAD2",3
GO:0000578,"GO:0000578","embryonic axis specification","2/163","39/18866",0.0446302920939603,0.0446302920939603,0.501977454081458,"HOXD8/SMAD2",2
GO:0010837,"GO:0010837","regulation of keratinocyte proliferation","2/163","39/18866",0.0446302920939603,0.0446302920939603,0.501977454081458,"CDH3/OVOL2",2
GO:0034205,"GO:0034205","amyloid-beta formation","2/163","39/18866",0.0446302920939603,0.0446302920939603,0.501977454081458,"ABCA7/EFNA1",2
GO:0038179,"GO:0038179","neurotrophin signaling pathway","2/163","39/18866",0.0446302920939603,0.0446302920939603,0.501977454081458,"DDIT4/RAPGEF2",2
GO:0046326,"GO:0046326","positive regulation of glucose import","2/163","39/18866",0.0446302920939603,0.0446302920939603,0.501977454081458,"ARPP19/KLF15",2
GO:0009953,"GO:0009953","dorsal/ventral pattern formation","3/163","92/18866",0.0455205186811,0.0455205186811,0.501977454081458,"DLL4/OVOL2/SMAD2",3
GO:0106027,"GO:0106027","neuron projection organization","3/163","92/18866",0.0455205186811,0.0455205186811,0.501977454081458,"ARHGAP33/DVL1/EFNA1",3
GO:0001890,"GO:0001890","placenta development","4/163","156/18866",0.0465321364513905,0.0465321364513905,0.501977454081458,"ADM/LIF/OVOL2/PLK4",4
GO:2001020,"GO:2001020","regulation of response to DNA damage stimulus","5/163","226/18866",0.0466616481146134,0.0466616481146134,0.501977454081458,"AUNIP/ERCC6/FANCB/KLHL15/RPS3",5
GO:0006284,"GO:0006284","base-excision repair","2/163","40/18866",0.0467187972439461,0.0467187972439461,0.501977454081458,"ERCC6/RPS3",2
GO:1902991,"GO:1902991","regulation of amyloid precursor protein catabolic process","2/163","40/18866",0.0467187972439461,0.0467187972439461,0.501977454081458,"ABCA7/EFNA1",2
GO:0061097,"GO:0061097","regulation of protein tyrosine kinase activity","3/163","93/18866",0.0467496881507851,0.0467496881507851,0.501977454081458,"EFNA1/ERCC6/TGFA",3
GO:2000117,"GO:2000117","negative regulation of cysteine-type endopeptidase activity","3/163","93/18866",0.0467496881507851,0.0467496881507851,0.501977454081458,"DDX3X/SERPINB9/THBS1",3
GO:0098739,"GO:0098739","import across plasma membrane","4/163","157/18866",0.0474401768663353,0.0474401768663353,0.501977454081458,"KCNJ8/SLC12A8/SLC39A6/THBS1",4
GO:0048286,"GO:0048286","lung alveolus development","2/163","41/18866",0.0488425349348366,0.0488425349348366,0.501977454081458,"CREB1/LIF",2
GO:0071548,"GO:0071548","response to dexamethasone","2/163","41/18866",0.0488425349348366,0.0488425349348366,0.501977454081458,"DDIT4/FECH",2
GO:0048814,"GO:0048814","regulation of dendrite morphogenesis","3/163","95/18866",0.0492568731162199,0.0492568731162199,0.501977454081458,"ARHGAP33/EFNA1/RAPGEF2",3
GO:0019985,"GO:0019985","translesion synthesis","2/163","42/18866",0.0510007488136866,0.0510007488136866,0.501977454081458,"USP10/USP43",2
GO:0046006,"GO:0046006","regulation of activated T cell proliferation","2/163","42/18866",0.0510007488136866,0.0510007488136866,0.501977454081458,"RC3H1/RPS3",2
GO:0060249,"GO:0060249","anatomical structure homeostasis","8/163","469/18866",0.0512307066699042,0.0512307066699042,0.501977454081458,"CCNE2/CDH3/CTSH/CXADR/DCP2/ERCC6/NCDN/PTGES3",8
GO:0050764,"GO:0050764","regulation of phagocytosis","3/163","97/18866",0.0518286465554554,0.0518286465554554,0.501977454081458,"ABCA7/ITGA2/SNX3",3
GO:0098659,"GO:0098659","inorganic cation import across plasma membrane","3/163","97/18866",0.0518286465554554,0.0518286465554554,0.501977454081458,"KCNJ8/SLC12A8/SLC39A6",3
GO:0099587,"GO:0099587","inorganic ion import across plasma membrane","3/163","97/18866",0.0518286465554554,0.0518286465554554,0.501977454081458,"KCNJ8/SLC12A8/SLC39A6",3
GO:0018105,"GO:0018105","peptidyl-serine phosphorylation","6/163","310/18866",0.0527061061912042,0.0527061061912042,0.501977454081458,"BRAF/DCLK2/DDIT4/DOCK7/IL11/LIF",6
GO:0014020,"GO:0014020","primary neural tube formation","3/163","98/18866",0.0531385431386425,0.0531385431386425,0.501977454081458,"ADM/DVL1/OVOL2",3
GO:0000413,"GO:0000413","protein peptidyl-prolyl isomerization","2/163","43/18866",0.0531926928240328,0.0531926928240328,0.501977454081458,"FKBP10/PPID",2
GO:0001953,"GO:0001953","negative regulation of cell-matrix adhesion","2/163","43/18866",0.0531926928240328,0.0531926928240328,0.501977454081458,"PHLDB2/THBS1",2
GO:0050856,"GO:0050856","regulation of T cell receptor signaling pathway","2/163","43/18866",0.0531926928240328,0.0531926928240328,0.501977454081458,"RC3H1/RPS3",2
GO:0045444,"GO:0045444","fat cell differentiation","5/163","235/18866",0.0534972077200553,0.0534972077200553,0.501977454081458,"ALOXE3/CREB1/CTBP2/IL11/RARRES2",5
GO:1904018,"GO:1904018","positive regulation of vasculature development","5/163","235/18866",0.0534972077200553,0.0534972077200553,0.501977454081458,"ADM/CTSH/MYDGF/RAPGEF2/THBS1",5
GO:0007044,"GO:0007044","cell-substrate junction assembly","3/163","99/18866",0.0544643295230215,0.0544643295230215,0.501977454081458,"ITGA2/PHLDB2/THBS1",3
GO:0090305,"GO:0090305","nucleic acid phosphodiester bond hydrolysis","6/163","313/18866",0.0547321713114005,0.0547321713114005,0.501977454081458,"DCP2/EXOSC9/FANCM/ISG20/PCF11/ZC3H12C",6
GO:0006904,"GO:0006904","vesicle docking involved in exocytosis","2/163","44/18866",0.0554176310862479,0.0554176310862479,0.501977454081458,"CTBP2/RALB",2
GO:0010824,"GO:0010824","regulation of centrosome duplication","2/163","44/18866",0.0554176310862479,0.0554176310862479,0.501977454081458,"PLK4/VPS4B",2
GO:0045005,"GO:0045005","DNA-dependent DNA replication maintenance of fidelity","2/163","44/18866",0.0554176310862479,0.0554176310862479,0.501977454081458,"FANCM/MMS22L",2
GO:0045687,"GO:0045687","positive regulation of glial cell differentiation","2/163","44/18866",0.0554176310862479,0.0554176310862479,0.501977454081458,"LIF/RHEB",2
GO:0045910,"GO:0045910","negative regulation of DNA recombination","2/163","44/18866",0.0554176310862479,0.0554176310862479,0.501977454081458,"FANCB/KLHL15",2
GO:0085029,"GO:0085029","extracellular matrix assembly","2/163","44/18866",0.0554176310862479,0.0554176310862479,0.501977454081458,"HAS3/PHLDB2",2
GO:1901985,"GO:1901985","positive regulation of protein acetylation","2/163","44/18866",0.0554176310862479,0.0554176310862479,0.501977454081458,"DDX3X/LIF",2
GO:0034249,"GO:0034249","negative regulation of cellular amide metabolic process","5/163","238/18866",0.055898717305809,0.055898717305809,0.501977454081458,"ABCA7/DDX3X/ILF3/RC3H1/RPS3",5
GO:1903531,"GO:1903531","negative regulation of secretion by cell","4/163","166/18866",0.0560532684212696,0.0560532684212696,0.501977454081458,"DPH3/IL11/LIF/VPS4B",4
GO:0070482,"GO:0070482","response to oxygen levels","7/163","396/18866",0.0566046482925039,0.0566046482925039,0.501977454081458,"ADM/BACH1/CREB1/DDIT4/ITGA2/PSMA4/THBS1",7
GO:2000116,"GO:2000116","regulation of cysteine-type endopeptidase activity","5/163","239/18866",0.0567128930580824,0.0567128930580824,0.501977454081458,"CTSH/DDX3X/RPS3/SERPINB9/THBS1",5
GO:0034250,"GO:0034250","positive regulation of cellular amide metabolic process","4/163","167/18866",0.0570590147926415,0.0570590147926415,0.501977454081458,"DDX3X/EFNA1/ITGA2/THBS1",4
GO:0042493,"GO:0042493","response to drug","7/163","397/18866",0.0572212189230494,0.0572212189230494,0.501977454081458,"ABCD3/CDH3/CREB1/CYP4B1/FECH/ITGA2/THBS1",7
GO:0001974,"GO:0001974","blood vessel remodeling","2/163","45/18866",0.0576748377791737,0.0576748377791737,0.501977454081458,"DLL4/LIF",2
GO:0045911,"GO:0045911","positive regulation of DNA recombination","2/163","45/18866",0.0576748377791737,0.0576748377791737,0.501977454081458,"ERCC6/FANCB",2
GO:0046189,"GO:0046189","phenol-containing compound biosynthetic process","2/163","45/18866",0.0576748377791737,0.0576748377791737,0.501977454081458,"CDH3/RAPGEF2",2
GO:0060996,"GO:0060996","dendritic spine development","3/163","102/18866",0.0585361156824656,0.0585361156824656,0.501977454081458,"ARHGAP33/DVL1/EFNA1",3
GO:0150115,"GO:0150115","cell-substrate junction organization","3/163","102/18866",0.0585361156824656,0.0585361156824656,0.501977454081458,"ITGA2/PHLDB2/THBS1",3
GO:0051051,"GO:0051051","negative regulation of transport","8/163","483/18866",0.0588325588024285,0.0588325588024285,0.501977454081458,"ABCA7/DPH3/IL11/LIF/SNX3/THBS1/VPS4B/YOD1",8
GO:1903320,"GO:1903320","regulation of protein modification by small protein conjugation or removal","5/163","242/18866",0.0591964209544131,0.0591964209544131,0.501977454081458,"DDX3X/FANCM/FEM1A/OTUD4/RPS3",5
GO:0002042,"GO:0002042","cell migration involved in sprouting angiogenesis","3/163","103/18866",0.0599245396773639,0.0599245396773639,0.501977454081458,"DLL4/MIA3/THBS1",3
GO:0008630,"GO:0008630","intrinsic apoptotic signaling pathway in response to DNA damage","3/163","103/18866",0.0599245396773639,0.0599245396773639,0.501977454081458,"DDIT4/ERCC6/RPS3",3
GO:0010761,"GO:0010761","fibroblast migration","2/163","46/18866",0.0599635970230186,0.0599635970230186,0.501977454081458,"FER/THBS1",2
GO:0032570,"GO:0032570","response to progesterone","2/163","46/18866",0.0599635970230186,0.0599635970230186,0.501977454081458,"NCOA2/THBS1",2
GO:0050798,"GO:0050798","activated T cell proliferation","2/163","46/18866",0.0599635970230186,0.0599635970230186,0.501977454081458,"RC3H1/RPS3",2
GO:2000142,"GO:2000142","regulation of DNA-templated transcription, initiation","2/163","46/18866",0.0599635970230186,0.0599635970230186,0.501977454081458,"CREB1/ERCC6",2
GO:0016197,"GO:0016197","endosomal transport","5/163","244/18866",0.0608862500183673,0.0608862500183673,0.501977454081458,"AP5S1/EPG5/SNX3/VPS39/VPS4B",5
GO:0140056,"GO:0140056","organelle localization by membrane tethering","4/163","171/18866",0.0611787017848333,0.0611787017848333,0.501977454081458,"CTBP2/HAUS3/PLK4/RALB",4
GO:0048525,"GO:0048525","negative regulation of viral process","3/163","104/18866",0.0613283830917731,0.0613283830917731,0.501977454081458,"ILF3/ISG20/SNX3",3
GO:0009895,"GO:0009895","negative regulation of catabolic process","6/163","323/18866",0.0618238718482179,0.0618238718482179,0.501977454081458,"DDIT4/EFNA1/FURIN/SNX3/USP36/YOD1",6
GO:0018394,"GO:0018394","peptidyl-lysine acetylation","4/163","172/18866",0.0622326980677404,0.0622326980677404,0.501977454081458,"KANSL2/KAT14/KLF15/LIF",4
GO:0006378,"GO:0006378","mRNA polyadenylation","2/163","47/18866",0.0622832027635091,0.0622832027635091,0.501977454081458,"CCNT1/PCF11",2
GO:0007157,"GO:0007157","heterophilic cell-cell adhesion via plasma membrane cell adhesion molecules","2/163","47/18866",0.0622832027635091,0.0622832027635091,0.501977454081458,"CD164/CXADR",2
GO:0014075,"GO:0014075","response to amine","2/163","47/18866",0.0622832027635091,0.0622832027635091,0.501977454081458,"ITGA2/RRM2B",2
GO:0035850,"GO:0035850","epithelial cell differentiation involved in kidney development","2/163","47/18866",0.0622832027635091,0.0622832027635091,0.501977454081458,"KLF15/LIF",2
GO:0120163,"GO:0120163","negative regulation of cold-induced thermogenesis","2/163","47/18866",0.0622832027635091,0.0622832027635091,0.501977454081458,"DOCK7/RHEB",2
GO:2001022,"GO:2001022","positive regulation of response to DNA damage stimulus","3/163","105/18866",0.0627475463045789,0.0627475463045789,0.501977454081458,"ERCC6/FANCB/RPS3",3
GO:0001841,"GO:0001841","neural tube formation","3/163","106/18866",0.0641819279808548,0.0641819279808548,0.501977454081458,"ADM/DVL1/OVOL2",3
GO:0014911,"GO:0014911","positive regulation of smooth muscle cell migration","2/163","48/18866",0.0646329586572815,0.0646329586572815,0.501977454081458,"DOCK7/ITGA2",2
GO:0032784,"GO:0032784","regulation of DNA-templated transcription, elongation","2/163","48/18866",0.0646329586572815,0.0646329586572815,0.501977454081458,"CCNT1/ERCC6",2
GO:0033628,"GO:0033628","regulation of cell adhesion mediated by integrin","2/163","48/18866",0.0646329586572815,0.0646329586572815,0.501977454081458,"EFNA1/LIF",2
GO:0043631,"GO:0043631","RNA polyadenylation","2/163","48/18866",0.0646329586572815,0.0646329586572815,0.501977454081458,"CCNT1/PCF11",2
GO:0061001,"GO:0061001","regulation of dendritic spine morphogenesis","2/163","48/18866",0.0646329586572815,0.0646329586572815,0.501977454081458,"ARHGAP33/EFNA1",2
GO:1990573,"GO:1990573","potassium ion import across plasma membrane","2/163","48/18866",0.0646329586572815,0.0646329586572815,0.501977454081458,"KCNJ8/SLC12A8",2
GO:1901568,"GO:1901568","fatty acid derivative metabolic process","4/163","175/18866",0.0654521094980595,0.0654521094980595,0.501977454081458,"ALOXE3/FAAH2/FAR1/PTGES3",4
GO:0000018,"GO:0000018","regulation of DNA recombination","3/163","107/18866",0.0656314251274768,0.0656314251274768,0.501977454081458,"ERCC6/FANCB/KLHL15",3
GO:0002448,"GO:0002448","mast cell mediated immunity","2/163","49/18866",0.0670121779584997,0.0670121779584997,0.501977454081458,"FER/SERPINB9",2
GO:0010171,"GO:0010171","body morphogenesis","2/163","49/18866",0.0670121779584997,0.0670121779584997,0.501977454081458,"CSRNP1/PHLDB2",2
GO:0060711,"GO:0060711","labyrinthine layer development","2/163","49/18866",0.0670121779584997,0.0670121779584997,0.501977454081458,"ADM/OVOL2",2
GO:0061383,"GO:0061383","trabecula morphogenesis","2/163","49/18866",0.0670121779584997,0.0670121779584997,0.501977454081458,"DLL4/OVOL2",2
GO:0090051,"GO:0090051","negative regulation of cell migration involved in sprouting angiogenesis","2/163","49/18866",0.0670121779584997,0.0670121779584997,0.501977454081458,"DLL4/THBS1",2
GO:1990090,"GO:1990090","cellular response to nerve growth factor stimulus","2/163","49/18866",0.0670121779584997,0.0670121779584997,0.501977454081458,"CREB1/RAPGEF2",2
GO:0032508,"GO:0032508","DNA duplex unwinding","3/163","108/18866",0.0670959331477605,0.0670959331477605,0.501977454081458,"DDX3X/ERCC6/FANCM",3
GO:0060071,"GO:0060071","Wnt signaling pathway, planar cell polarity pathway","3/163","108/18866",0.0670959331477605,0.0670959331477605,0.501977454081458,"DAAM1/DVL1/PSMA4",3
GO:0001655,"GO:0001655","urogenital system development","6/163","330/18866",0.0670984140168816,0.0670984140168816,0.501977454081458,"CTSH/GDF11/KLF15/LIF/RRM2B/SMAD2",6
GO:0030324,"GO:0030324","lung development","4/163","177/18866",0.0676459905194203,0.0676459905194203,0.501977454081458,"CREB1/CTSH/LIF/SMAD2",4
GO:0006401,"GO:0006401","RNA catabolic process","7/163","415/18866",0.0690362330670177,0.0690362330670177,0.501977454081458,"DCP2/DEDD2/EXOSC9/ISG20/PSMA4/RC3H1/RPS3",7
GO:0031648,"GO:0031648","protein destabilization","2/163","50/18866",0.0694201834066902,0.0694201834066902,0.501977454081458,"CCDC88C/CTSH",2
GO:0032456,"GO:0032456","endocytic recycling","2/163","50/18866",0.0694201834066902,0.0694201834066902,0.501977454081458,"EPG5/SNX3",2
GO:0042987,"GO:0042987","amyloid precursor protein catabolic process","2/163","50/18866",0.0694201834066902,0.0694201834066902,0.501977454081458,"ABCA7/EFNA1",2
GO:0043616,"GO:0043616","keratinocyte proliferation","2/163","50/18866",0.0694201834066902,0.0694201834066902,0.501977454081458,"CDH3/OVOL2",2
GO:0048546,"GO:0048546","digestive tract morphogenesis","2/163","50/18866",0.0694201834066902,0.0694201834066902,0.501977454081458,"OVOL2/SMAD2",2
GO:0018209,"GO:0018209","peptidyl-serine modification","6/163","333/18866",0.0694372143260272,0.0694372143260272,0.501977454081458,"BRAF/DCLK2/DDIT4/DOCK7/IL11/LIF",6
GO:0006900,"GO:0006900","vesicle budding from membrane","3/163","110/18866",0.0700695557258583,0.0700695557258583,0.501977454081458,"MIA3/SNX3/TGFA",3
GO:0007041,"GO:0007041","lysosomal transport","3/163","110/18866",0.0700695557258583,0.0700695557258583,0.501977454081458,"EPG5/VPS39/VPS4B",3
GO:0090100,"GO:0090100","positive regulation of transmembrane receptor protein serine/threonine kinase signaling pathway","3/163","110/18866",0.0700695557258583,0.0700695557258583,0.501977454081458,"GDF11/SMAD2/THBS1",3
GO:0090175,"GO:0090175","regulation of establishment of planar polarity","3/163","110/18866",0.0700695557258583,0.0700695557258583,0.501977454081458,"DAAM1/DVL1/PSMA4",3
GO:1904659,"GO:1904659","glucose transmembrane transport","3/163","110/18866",0.0700695557258583,0.0700695557258583,0.501977454081458,"ARPP19/BRAF/KLF15",3
GO:0007059,"GO:0007059","chromosome segregation","6/163","334/18866",0.0702272443472174,0.0702272443472174,0.501977454081458,"CCNE2/DDX3X/FANCM/MAU2/RPS3/VPS4B",6
GO:0021879,"GO:0021879","forebrain neuron differentiation","2/163","51/18866",0.0718563071157782,0.0718563071157782,0.501977454081458,"DCLK2/RAPGEF2",2
GO:0043277,"GO:0043277","apoptotic cell clearance","2/163","51/18866",0.0718563071157782,0.0718563071157782,0.501977454081458,"ABCA7/THBS1",2
GO:0050435,"GO:0050435","amyloid-beta metabolic process","2/163","51/18866",0.0718563071157782,0.0718563071157782,0.501977454081458,"ABCA7/EFNA1",2
GO:0071675,"GO:0071675","regulation of mononuclear cell migration","2/163","51/18866",0.0718563071157782,0.0718563071157782,0.501977454081458,"RARRES2/THBS1",2
GO:1903587,"GO:1903587","regulation of blood vessel endothelial cell proliferation involved in sprouting angiogenesis","2/163","51/18866",0.0718563071157782,0.0718563071157782,0.501977454081458,"DLL4/THBS1",2
GO:0030323,"GO:0030323","respiratory tube development","4/163","181/18866",0.0721470462171592,0.0721470462171592,0.501977454081458,"CREB1/CTSH/LIF/SMAD2",4
GO:0090288,"GO:0090288","negative regulation of cellular response to growth factor stimulus","4/163","182/18866",0.073295744581934,0.073295744581934,0.501977454081458,"CTDSPL2/EID2/SMAD2/THBS1",4
GO:0010951,"GO:0010951","negative regulation of endopeptidase activity","5/163","258/18866",0.073476483322127,0.073476483322127,0.501977454081458,"CSTB/DDX3X/FURIN/SERPINB9/THBS1",5
GO:0003179,"GO:0003179","heart valve morphogenesis","2/163","52/18866",0.0743198904643146,0.0743198904643146,0.501977454081458,"DLL4/EFNA1",2
GO:0006301,"GO:0006301","postreplication repair","2/163","52/18866",0.0743198904643146,0.0743198904643146,0.501977454081458,"USP10/USP43",2
GO:0060425,"GO:0060425","lung morphogenesis","2/163","52/18866",0.0743198904643146,0.0743198904643146,0.501977454081458,"CTSH/LIF",2
GO:0071622,"GO:0071622","regulation of granulocyte chemotaxis","2/163","52/18866",0.0743198904643146,0.0743198904643146,0.501977454081458,"RARRES2/THBS1",2
GO:1990089,"GO:1990089","response to nerve growth factor","2/163","52/18866",0.0743198904643146,0.0743198904643146,0.501977454081458,"CREB1/RAPGEF2",2
GO:2001238,"GO:2001238","positive regulation of extrinsic apoptotic signaling pathway","2/163","52/18866",0.0743198904643146,0.0743198904643146,0.501977454081458,"DEDD2/THBS1",2
GO:0071347,"GO:0071347","cellular response to interleukin-1","4/163","183/18866",0.0744537556701284,0.0744537556701284,0.501977454081458,"OTUD4/PSMA4/RC3H1/USP10",4
GO:2001235,"GO:2001235","positive regulation of apoptotic signaling pathway","4/163","183/18866",0.0744537556701284,0.0744537556701284,0.501977454081458,"CTSH/DEDD2/RPS3/THBS1",4
GO:0001676,"GO:0001676","long-chain fatty acid metabolic process","3/163","113/18866",0.0746398699043651,0.0746398699043651,0.501977454081458,"ALOXE3/FAAH2/PTGES3",3
GO:0016050,"GO:0016050","vesicle organization","6/163","340/18866",0.0750767825040172,0.0750767825040172,0.501977454081458,"CREB1/MIA3/SNX3/TGFA/VPS39/VPS4B",6
GO:1903362,"GO:1903362","regulation of cellular protein catabolic process","5/163","260/18866",0.0753831645630914,0.0753831645630914,0.501977454081458,"DVL1/EFNA1/FBXO22/FURIN/YOD1",5
GO:0038061,"GO:0038061","NIK/NF-kappaB signaling","4/163","184/18866",0.0756210475408669,0.0756210475408669,0.501977454081458,"DDX3X/PSMA4/RC3H1/RPS3",4
GO:0043588,"GO:0043588","skin development","7/163","425/18866",0.0761895708955731,0.0761895708955731,0.501977454081458,"ALOXE3/CDH3/FURIN/ITGA2/KRT18/OVOL2/ZDHHC21",7
GO:0008645,"GO:0008645","hexose transmembrane transport","3/163","114/18866",0.0761921634810522,0.0761921634810522,0.501977454081458,"ARPP19/BRAF/KLF15",3
GO:0001894,"GO:0001894","tissue homeostasis","5/163","261/18866",0.0763465566934883,0.0763465566934883,0.501977454081458,"CDH3/CTSH/CXADR/ERCC6/NCDN",5
GO:0043405,"GO:0043405","regulation of MAP kinase activity","6/163","342/18866",0.0767348821572594,0.0767348821572594,0.501977454081458,"BRAF/ERCC6/MAP3K1/RPS3/TGFA/THBS1",6
GO:0000731,"GO:0000731","DNA synthesis involved in DNA repair","2/163","53/18866",0.0768102839868822,0.0768102839868822,0.501977454081458,"USP10/USP43",2
GO:0051225,"GO:0051225","spindle assembly","3/163","115/18866",0.0777586952454095,0.0777586952454095,0.501977454081458,"HAUS3/RPS3/VPS4B",3
GO:0043488,"GO:0043488","regulation of mRNA stability","4/163","186/18866",0.0779833419260488,0.0779833419260488,0.501977454081458,"DCP2/EXOSC9/PSMA4/RC3H1",4
GO:0050730,"GO:0050730","regulation of peptidyl-tyrosine phosphorylation","5/163","263/18866",0.0782933857904455,0.0782933857904455,0.501977454081458,"EFNA1/ERCC6/IL11/LIF/TGFA",5
GO:1903311,"GO:1903311","regulation of mRNA metabolic process","6/163","344/18866",0.0784137246094208,0.0784137246094208,0.501977454081458,"CCNT1/DCP2/EXOSC9/PSMA4/RC3H1/SRSF10",6
GO:0015749,"GO:0015749","monosaccharide transmembrane transport","3/163","116/18866",0.07933934962636,0.07933934962636,0.501977454081458,"ARPP19/BRAF/KLF15",3
GO:0032392,"GO:0032392","DNA geometric change","3/163","116/18866",0.07933934962636,0.07933934962636,0.501977454081458,"DDX3X/ERCC6/FANCM",3
GO:0007369,"GO:0007369","gastrulation","4/163","189/18866",0.0815955460071212,0.0815955460071212,0.501977454081458,"DVL1/ITGA2/PHLDB2/SMAD2",4
GO:0043534,"GO:0043534","blood vessel endothelial cell migration","4/163","189/18866",0.0815955460071212,0.0815955460071212,0.501977454081458,"DLL4/EFNA1/MIA3/THBS1",4
GO:0036297,"GO:0036297","interstrand cross-link repair","2/163","55/18866",0.081868948829188,0.081868948829188,0.501977454081458,"FANCB/FANCM",2
GO:0033559,"GO:0033559","unsaturated fatty acid metabolic process","3/163","118/18866",0.082542558231335,0.082542558231335,0.501977454081458,"ALOXE3/FAAH2/PTGES3",3
GO:0034219,"GO:0034219","carbohydrate transmembrane transport","3/163","118/18866",0.082542558231335,0.082542558231335,0.501977454081458,"ARPP19/BRAF/KLF15",3
GO:0051048,"GO:0051048","negative regulation of secretion","4/163","190/18866",0.0828178083411833,0.0828178083411833,0.501977454081458,"DPH3/IL11/LIF/VPS4B",4
GO:0070507,"GO:0070507","regulation of microtubule cytoskeleton organization","4/163","190/18866",0.0828178083411833,0.0828178083411833,0.501977454081458,"PHLDB2/PLK4/RPS3/VPS4B",4
GO:0000290,"GO:0000290","deadenylation-dependent decapping of nuclear-transcribed mRNA","1/163","10/18866",0.083134974645218,0.083134974645218,0.501977454081458,"DCP2",1
GO:0001840,"GO:0001840","neural plate development","1/163","10/18866",0.083134974645218,0.083134974645218,0.501977454081458,"DVL1",1
GO:0003183,"GO:0003183","mitral valve morphogenesis","1/163","10/18866",0.083134974645218,0.083134974645218,0.501977454081458,"EFNA1",1
GO:0006971,"GO:0006971","hypotonic response","1/163","10/18866",0.083134974645218,0.083134974645218,0.501977454081458,"ITGA2",1
GO:0007440,"GO:0007440","foregut morphogenesis","1/163","10/18866",0.083134974645218,0.083134974645218,0.501977454081458,"SMAD2",1
GO:0010269,"GO:0010269","response to selenium ion","1/163","10/18866",0.083134974645218,0.083134974645218,0.501977454081458,"SELENOW",1
GO:0010749,"GO:0010749","regulation of nitric oxide mediated signal transduction","1/163","10/18866",0.083134974645218,0.083134974645218,0.501977454081458,"THBS1",1
GO:0010944,"GO:0010944","negative regulation of transcription by competitive promoter binding","1/163","10/18866",0.083134974645218,0.083134974645218,0.501977454081458,"CREB1",1
GO:0015937,"GO:0015937","coenzyme A biosynthetic process","1/163","10/18866",0.083134974645218,0.083134974645218,0.501977454081458,"PANK3",1
GO:0016139,"GO:0016139","glycoside catabolic process","1/163","10/18866",0.083134974645218,0.083134974645218,0.501977454081458,"FUCA1",1
GO:0021859,"GO:0021859","pyramidal neuron differentiation","1/163","10/18866",0.083134974645218,0.083134974645218,0.501977454081458,"DCLK2",1
GO:0031125,"GO:0031125","rRNA 3'-end processing","1/163","10/18866",0.083134974645218,0.083134974645218,0.501977454081458,"EXOSC9",1
GO:0032070,"GO:0032070","regulation of deoxyribonuclease activity","1/163","10/18866",0.083134974645218,0.083134974645218,0.501977454081458,"RPS3",1
GO:0034085,"GO:0034085","establishment of sister chromatid cohesion","1/163","10/18866",0.083134974645218,0.083134974645218,0.501977454081458,"MAU2",1
GO:0034154,"GO:0034154","toll-like receptor 7 signaling pathway","1/163","10/18866",0.083134974645218,0.083134974645218,0.501977454081458,"DDX3X",1
GO:0034427,"GO:0034427","nuclear-transcribed mRNA catabolic process, exonucleolytic, 3'-5'","1/163","10/18866",0.083134974645218,0.083134974645218,0.501977454081458,"EXOSC9",1
GO:0034770,"GO:0034770","histone H4-K20 methylation","1/163","10/18866",0.083134974645218,0.083134974645218,0.501977454081458,"ARID4B",1
GO:0034975,"GO:0034975","protein folding in endoplasmic reticulum","1/163","10/18866",0.083134974645218,0.083134974645218,0.501977454081458,"DNAJC10",1
GO:0035871,"GO:0035871","protein K11-linked deubiquitination","1/163","10/18866",0.083134974645218,0.083134974645218,0.501977454081458,"YOD1",1
GO:0035907,"GO:0035907","dorsal aorta development","1/163","10/18866",0.083134974645218,0.083134974645218,0.501977454081458,"DLL4",1
GO:0036490,"GO:0036490","regulation of translation in response to endoplasmic reticulum stress","1/163","10/18866",0.083134974645218,0.083134974645218,0.501977454081458,"DDX3X",1
GO:0044857,"GO:0044857","plasma membrane raft organization","1/163","10/18866",0.083134974645218,0.083134974645218,0.501977454081458,"ABCA7",1
GO:0045713,"GO:0045713","low-density lipoprotein particle receptor biosynthetic process","1/163","10/18866",0.083134974645218,0.083134974645218,0.501977454081458,"FURIN",1
GO:0048340,"GO:0048340","paraxial mesoderm morphogenesis","1/163","10/18866",0.083134974645218,0.083134974645218,0.501977454081458,"SMAD2",1
GO:0048570,"GO:0048570","notochord morphogenesis","1/163","10/18866",0.083134974645218,0.083134974645218,0.501977454081458,"EFNA1",1
GO:0048739,"GO:0048739","cardiac muscle fiber development","1/163","10/18866",0.083134974645218,0.083134974645218,0.501977454081458,"CXADR",1
GO:0051918,"GO:0051918","negative regulation of fibrinolysis","1/163","10/18866",0.083134974645218,0.083134974645218,0.501977454081458,"THBS1",1
GO:0060600,"GO:0060600","dichotomous subdivision of an epithelial terminal unit","1/163","10/18866",0.083134974645218,0.083134974645218,0.501977454081458,"CTSH",1
GO:0070862,"GO:0070862","negative regulation of protein exit from endoplasmic reticulum","1/163","10/18866",0.083134974645218,0.083134974645218,0.501977454081458,"YOD1",1
GO:0071649,"GO:0071649","regulation of chemokine (C-C motif) ligand 5 production","1/163","10/18866",0.083134974645218,0.083134974645218,0.501977454081458,"DDX3X",1
GO:0098722,"GO:0098722","asymmetric stem cell division","1/163","10/18866",0.083134974645218,0.083134974645218,0.501977454081458,"DOCK7",1
GO:0120252,"GO:0120252","hydrocarbon metabolic process","1/163","10/18866",0.083134974645218,0.083134974645218,0.501977454081458,"CYP4B1",1
GO:1901203,"GO:1901203","positive regulation of extracellular matrix assembly","1/163","10/18866",0.083134974645218,0.083134974645218,0.501977454081458,"PHLDB2",1
GO:1904896,"GO:1904896","ESCRT complex disassembly","1/163","10/18866",0.083134974645218,0.083134974645218,0.501977454081458,"VPS4B",1
GO:1904903,"GO:1904903","ESCRT III complex disassembly","1/163","10/18866",0.083134974645218,0.083134974645218,0.501977454081458,"VPS4B",1
GO:2000320,"GO:2000320","negative regulation of T-helper 17 cell differentiation","1/163","10/18866",0.083134974645218,0.083134974645218,0.501977454081458,"RC3H1",1
GO:2000382,"GO:2000382","positive regulation of mesoderm development","1/163","10/18866",0.083134974645218,0.083134974645218,0.501977454081458,"SMAD2",1
GO:2000425,"GO:2000425","regulation of apoptotic cell clearance","1/163","10/18866",0.083134974645218,0.083134974645218,0.501977454081458,"ABCA7",1
GO:2000644,"GO:2000644","regulation of receptor catabolic process","1/163","10/18866",0.083134974645218,0.083134974645218,0.501977454081458,"FURIN",1
GO:2000659,"GO:2000659","regulation of interleukin-1-mediated signaling pathway","1/163","10/18866",0.083134974645218,0.083134974645218,0.501977454081458,"OTUD4",1
GO:2000786,"GO:2000786","positive regulation of autophagosome assembly","1/163","10/18866",0.083134974645218,0.083134974645218,0.501977454081458,"RALB",1
GO:0048167,"GO:0048167","regulation of synaptic plasticity","4/163","191/18866",0.0840491063700432,0.0840491063700432,0.501977454081458,"CREB1/NCDN/RAPGEF2/RIN1",4
GO:1901222,"GO:1901222","regulation of NIK/NF-kappaB signaling","3/163","119/18866",0.08416487572675,0.08416487572675,0.501977454081458,"DDX3X/RC3H1/RPS3",3
GO:0021953,"GO:0021953","central nervous system neuron differentiation","4/163","192/18866",0.0852894021437061,0.0852894021437061,0.501977454081458,"AGTPBP1/DCLK2/DLL4/RAPGEF2",4
GO:0019748,"GO:0019748","secondary metabolic process","2/163","57/18866",0.0870272849865035,0.0870272849865035,0.501977454081458,"CDH3/RAPGEF2",2
GO:0045292,"GO:0045292","mRNA cis splicing, via spliceosome","2/163","57/18866",0.0870272849865035,0.0870272849865035,0.501977454081458,"DDX23/SRSF10",2
GO:0061005,"GO:0061005","cell differentiation involved in kidney development","2/163","57/18866",0.0870272849865035,0.0870272849865035,0.501977454081458,"KLF15/LIF",2
GO:0010466,"GO:0010466","negative regulation of peptidase activity","5/163","272/18866",0.0873822512922594,0.0873822512922594,0.501977454081458,"CSTB/DDX3X/FURIN/SERPINB9/THBS1",5
GO:0007613,"GO:0007613","memory","3/163","121/18866",0.0874503375703488,0.0874503375703488,0.501977454081458,"ABCA7/CREB1/RIN1",3
GO:0043487,"GO:0043487","regulation of RNA stability","4/163","195/18866",0.0890638859858777,0.0890638859858777,0.501977454081458,"DCP2/EXOSC9/PSMA4/RC3H1",4
GO:0006690,"GO:0006690","icosanoid metabolic process","3/163","122/18866",0.0891132392018055,0.0891132392018055,0.501977454081458,"ALOXE3/FAAH2/PTGES3",3
GO:0002043,"GO:0002043","blood vessel endothelial cell proliferation involved in sprouting angiogenesis","2/163","58/18866",0.0896423004034571,0.0896423004034571,0.501977454081458,"DLL4/THBS1",2
GO:0002763,"GO:0002763","positive regulation of myeloid leukocyte differentiation","2/163","58/18866",0.0896423004034571,0.0896423004034571,0.501977454081458,"CREB1/LIF",2
GO:0071897,"GO:0071897","DNA biosynthetic process","4/163","196/18866",0.0903397793860262,0.0903397793860262,0.501977454081458,"DCP2/PTGES3/USP10/USP43",4
GO:0007173,"GO:0007173","epidermal growth factor receptor signaling pathway","3/163","123/18866",0.0907894246469777,0.0907894246469777,0.501977454081458,"BRAF/FER/TGFA",3
GO:1901342,"GO:1901342","regulation of vasculature development","7/163","444/18866",0.0909400346926509,0.0909400346926509,0.501977454081458,"ADM/CTSH/DLL4/EFNA1/MYDGF/RAPGEF2/THBS1",7
GO:0002182,"GO:0002182","cytoplasmic translational elongation","1/163","11/18866",0.0910607807086897,0.0910607807086897,0.501977454081458,"DPH3",1
GO:0002604,"GO:0002604","regulation of dendritic cell antigen processing and presentation","1/163","11/18866",0.0910607807086897,0.0910607807086897,0.501977454081458,"THBS1",1
GO:0003157,"GO:0003157","endocardium development","1/163","11/18866",0.0910607807086897,0.0910607807086897,0.501977454081458,"OVOL2",1
GO:0003174,"GO:0003174","mitral valve development","1/163","11/18866",0.0910607807086897,0.0910607807086897,0.501977454081458,"EFNA1",1
GO:0005984,"GO:0005984","disaccharide metabolic process","1/163","11/18866",0.0910607807086897,0.0910607807086897,0.501977454081458,"BRAF",1
GO:0007256,"GO:0007256","activation of JNKK activity","1/163","11/18866",0.0910607807086897,0.0910607807086897,0.501977454081458,"ERCC6",1
GO:0008611,"GO:0008611","ether lipid biosynthetic process","1/163","11/18866",0.0910607807086897,0.0910607807086897,0.501977454081458,"FAR1",1
GO:0009950,"GO:0009950","dorsal/ventral axis specification","1/163","11/18866",0.0910607807086897,0.0910607807086897,0.501977454081458,"SMAD2",1
GO:0010172,"GO:0010172","embryonic body morphogenesis","1/163","11/18866",0.0910607807086897,0.0910607807086897,0.501977454081458,"PHLDB2",1
GO:0016078,"GO:0016078","tRNA catabolic process","1/163","11/18866",0.0910607807086897,0.0910607807086897,0.501977454081458,"EXOSC9",1
GO:0016081,"GO:0016081","synaptic vesicle docking","1/163","11/18866",0.0910607807086897,0.0910607807086897,0.501977454081458,"CTBP2",1
GO:0017085,"GO:0017085","response to insecticide","1/163","11/18866",0.0910607807086897,0.0910607807086897,0.501977454081458,"FECH",1
GO:0019371,"GO:0019371","cyclooxygenase pathway","1/163","11/18866",0.0910607807086897,0.0910607807086897,0.501977454081458,"PTGES3",1
GO:0042985,"GO:0042985","negative regulation of amyloid precursor protein biosynthetic process","1/163","11/18866",0.0910607807086897,0.0910607807086897,0.501977454081458,"ABCA7",1
GO:0043589,"GO:0043589","skin morphogenesis","1/163","11/18866",0.0910607807086897,0.0910607807086897,0.501977454081458,"ITGA2",1
GO:0044848,"GO:0044848","biological phase","1/163","11/18866",0.0910607807086897,0.0910607807086897,0.501977454081458,"CDH3",1
GO:0045835,"GO:0045835","negative regulation of meiotic nuclear division","1/163","11/18866",0.0910607807086897,0.0910607807086897,0.501977454081458,"LIF",1
GO:0045899,"GO:0045899","positive regulation of RNA polymerase II transcription preinitiation complex assembly","1/163","11/18866",0.0910607807086897,0.0910607807086897,0.501977454081458,"CREB1",1
GO:0046501,"GO:0046501","protoporphyrinogen IX metabolic process","1/163","11/18866",0.0910607807086897,0.0910607807086897,0.501977454081458,"FECH",1
GO:0046504,"GO:0046504","glycerol ether biosynthetic process","1/163","11/18866",0.0910607807086897,0.0910607807086897,0.501977454081458,"FAR1",1
GO:0048742,"GO:0048742","regulation of skeletal muscle fiber development","1/163","11/18866",0.0910607807086897,0.0910607807086897,0.501977454081458,"FBXO22",1
GO:0048875,"GO:0048875","chemical homeostasis within a tissue","1/163","11/18866",0.0910607807086897,0.0910607807086897,0.501977454081458,"CTSH",1
GO:0061314,"GO:0061314","Notch signaling involved in heart development","1/163","11/18866",0.0910607807086897,0.0910607807086897,0.501977454081458,"DLL4",1
GO:0071609,"GO:0071609","chemokine (C-C motif) ligand 5 production","1/163","11/18866",0.0910607807086897,0.0910607807086897,0.501977454081458,"DDX3X",1
GO:0086016,"GO:0086016","AV node cell action potential","1/163","11/18866",0.0910607807086897,0.0910607807086897,0.501977454081458,"CXADR",1
GO:0086027,"GO:0086027","AV node cell to bundle of His cell signaling","1/163","11/18866",0.0910607807086897,0.0910607807086897,0.501977454081458,"CXADR",1
GO:0090557,"GO:0090557","establishment of endothelial intestinal barrier","1/163","11/18866",0.0910607807086897,0.0910607807086897,0.501977454081458,"RAPGEF2",1
GO:0097048,"GO:0097048","dendritic cell apoptotic process","1/163","11/18866",0.0910607807086897,0.0910607807086897,0.501977454081458,"RAPGEF2",1
GO:0097384,"GO:0097384","cellular lipid biosynthetic process","1/163","11/18866",0.0910607807086897,0.0910607807086897,0.501977454081458,"FAR1",1
GO:0140052,"GO:0140052","cellular response to oxidised low-density lipoprotein particle stimulus","1/163","11/18866",0.0910607807086897,0.0910607807086897,0.501977454081458,"MIA3",1
GO:1900247,"GO:1900247","regulation of cytoplasmic translational elongation","1/163","11/18866",0.0910607807086897,0.0910607807086897,0.501977454081458,"DPH3",1
GO:1902065,"GO:1902065","response to L-glutamate","1/163","11/18866",0.0910607807086897,0.0910607807086897,0.501977454081458,"CREB1",1
GO:1902474,"GO:1902474","positive regulation of protein localization to synapse","1/163","11/18866",0.0910607807086897,0.0910607807086897,0.501977454081458,"DVL1",1
GO:1905245,"GO:1905245","regulation of aspartic-type peptidase activity","1/163","11/18866",0.0910607807086897,0.0910607807086897,0.501977454081458,"EFNA1",1
GO:1905383,"GO:1905383","protein localization to presynapse","1/163","11/18866",0.0910607807086897,0.0910607807086897,0.501977454081458,"DVL1",1
GO:2000317,"GO:2000317","negative regulation of T-helper 17 type immune response","1/163","11/18866",0.0910607807086897,0.0910607807086897,0.501977454081458,"RC3H1",1
GO:2000628,"GO:2000628","regulation of miRNA metabolic process","1/163","11/18866",0.0910607807086897,0.0910607807086897,0.501977454081458,"RC3H1",1
[truncated: 2,291 more rows]

## Sheet: turquoise
,"ID","Description","GeneRatio","BgRatio","pvalue","p.adjust","qvalue","geneID","Count"
[truncated: 347 more rows]

## Sheet: maroon
,"ID","Description","GeneRatio","BgRatio","pvalue","p.adjust","qvalue","geneID","Count"
[truncated: 4,284 more rows]

[truncated: 10 more sheets: sandybrown, orchid, pink, gold, lightgreen, khaki, lightblue, darkgrey, indianred, darkorange]
