# Supplementary material for: Decoding mechanism of action and sensitivity to drug candidates from integrated transcriptome and chromatin state
Source: eLife. 2022 Aug 31;11:e78012. doi: 10.7554/eLife.78012 (PMC9433094; doi:10.7554/eLife.78012)
Supplement: Supplementary file 5. [file elife-78012-supp5.xlsx]

## Sheet: signature_up
,"x"
1,"M6PR"
2,"PDK4"
3,"ST3GAL1"
4,"STARD3NL"
5,"GPRC5A"
6,"BIRC3"
7,"KCNG1"
8,"SLC4A7"
9,"TLL1"
10,"VCAN"
11,"TNC"
12,"CAPG"
13,"TSPAN17"
14,"SOAT1"
15,"USP13"
16,"BCAT1"
17,"SPA17"
18,"FAM107B"
19,"MSANTD3"
20,"PFKP"
21,"SLC6A15"
22,"FBXW11"
23,"NLE1"
24,"PICALM"
25,"SRI"
26,"SEMA3C"
27,"SYNJ2"
28,"EDN1"
29,"MOXD1"
30,"AKR1B1"
31,"POMGNT1"
32,"ZNF302"
33,"IRAK3"
34,"SCD"
35,"MARCH2"
36,"MTAP"
37,"PPM1F"
38,"LGALS1"
39,"TSPO"
40,"CERK"
41,"PYGB"
42,"PROCR"
43,"CD40"
44,"BMP7"
45,"PXMP4"
46,"CYB5B"
47,"HAS3"
48,"COTL1"
49,"RIPK2"
50,"POP1"
51,"FCGRT"
52,"PIK3CG"
53,"CAV1"
54,"MET"
55,"CYP3A5"
56,"AGR2"
57,"EBF3"
58,"FTSJ3"
59,"SMURF2"
60,"CTSC"
61,"ZPR1"
62,"PUS3"
63,"BIRC2"
64,"SLC35F2"
65,"KRT18"
66,"GLI1"
67,"OAS2"
68,"ARHGDIB"
69,"HCFC2"
70,"RIC8B"
71,"VNN2"
72,"QKI"
73,"ERGIC1"
74,"STC2"
75,"PDCD10"
76,"VIPR1"
77,"MLPH"
78,"MSH6"
79,"EPHA4"
80,"CRYZ"
81,"NID1"
82,"ZNF684"
83,"ADGRL2"
84,"RGS4"
85,"DARS2"
86,"RAB32"
87,"SPP1"
88,"WDR35"
89,"SNX19"
90,"TGFBI"
91,"WASHC3"
92,"LYPLA1"
93,"CRISPLD1"
94,"TRIM6"
95,"ECHDC2"
96,"PLBD1"
97,"DEPDC7"
98,"TMEM156"
99,"FAM126A"
100,"PLAU"
101,"BICC1"
102,"EREG"
103,"FOXA2"
104,"FRMD8"
105,"ASL"
106,"MTERF1"
107,"SGCE"
108,"MAP7D3"
109,"BST2"
110,"UNC13A"
111,"MNX1"
112,"ADRM1"
113,"MRPS25"
114,"PDLIM4"
115,"WASF3"
116,"EPSTI1"
117,"VAV3"
118,"SLC38A2"
119,"CCNH"
120,"EMP1"
121,"SOX5"
122,"PHC2"
123,"ETS1"
124,"ANKRD6"
125,"EHF"
126,"KCNMB4"
127,"LAMC1"
128,"EDAR"
129,"ALDH1L2"
130,"FLNB"
131,"RSAD1"
132,"SKIL"
133,"ANGPTL2"
134,"ZFP37"
135,"SORL1"
136,"MMP7"
137,"FXYD2"
138,"ALKBH8"
139,"IFI44"
140,"GPR87"
141,"SLC40A1"
142,"MNS1"
143,"GLIPR1"
144,"SLC46A3"
145,"SLAIN1"
146,"FRMD6"
147,"KIFC3"
148,"ZNF287"
149,"GREB1L"
150,"IGFBP4"
151,"FKBP10"
152,"EFHD2"
153,"CTTNBP2NL"
154,"GPR161"
155,"TOR1AIP1"
156,"SNAPIN"
157,"RALB"
158,"TRPC1"
159,"SLIT2"
160,"PLAC8"
161,"PLK2"
162,"ARHGAP26"
163,"SLC22A3"
164,"SDK1"
165,"ANKRD1"
166,"ADM"
167,"TMEM218"
168,"WDR17"
169,"IL18"
170,"TEX30"
171,"MIPOL1"
172,"POC5"
173,"ZNF547"
174,"CAMK4"
175,"PRDM8"
176,"ADGRF1"
177,"TNIK"
178,"FAM167A"
179,"RHOC"
180,"PIK3AP1"
181,"MICU3"
182,"ADAMTS3"
183,"CD109"
184,"DYNC1I1"
185,"CIART"
186,"CBR3"
187,"SHC1"
188,"ITGA5"
189,"SHANK2"
190,"MEGF6"
191,"SNX7"
192,"FAM102B"
193,"KCNT2"
194,"CAPN2"
195,"IGFBP7"
196,"IFI16"
197,"TIPARP"
198,"GYG1"
199,"SPRY1"
200,"F2RL2"
201,"CMBL"
202,"DACT2"
203,"STK17A"
204,"GALNT10"
205,"ABCA1"
206,"ARHGEF40"
207,"METTL3"
208,"HACD1"
209,"SMCO4"
210,"HTRA1"
211,"GPR176"
212,"ADAMTS15"
213,"FBN1"
214,"CLMP"
215,"PRTG"
216,"ANPEP"
217,"STAT6"
218,"ATP5L"
219,"IGFBP6"
220,"TRANK1"
221,"ULK4"
222,"DDIT4"
223,"TAP1"
224,"CXXC4"
225,"SCN9A"
226,"TM4SF1"
227,"ALCAM"
228,"GPRC5C"
229,"KRT8"
230,"LONRF2"
231,"SMAGP"
232,"MSANTD4"
233,"CAVIN3"
234,"NETO2"
235,"TMEM37"
236,"SLFN12"
237,"NEGR1"
238,"BPGM"
239,"SLFN11"
240,"NBEA"
241,"EHBP1L1"
242,"MSRB3"
243,"TLR1"
244,"B4GAT1"
245,"RIN1"
246,"NRIP3"
247,"FOSL1"
248,"CCDC85B"
249,"BNIP3"
250,"SLCO3A1"
251,"NCKAP5"
252,"FAM109B"
253,"DSCAML1"
254,"SAMD9L"
255,"JUN"
256,"CD163L1"
257,"ALS2CL"
258,"ARL14"
259,"F2R"
260,"COL18A1"
261,"PTTG1IP"
262,"SLC35F3"
263,"HIST1H1B"
264,"KPNA4"
265,"ARAP1"
266,"TCEA1"
267,"ARL4C"
268,"LAMTOR4"
269,"PAQR9"
270,"DPYD"
271,"ZNF548"
272,"S100A13"
273,"S100A4"
274,"EVL"
275,"CASP4"
276,"SLC22A4"
277,"GSTK1"
278,"HIST4H4"
279,"S100A6"
280,"MAK16"
281,"CHSY3"
282,"TUSC1"
283,"F5"
284,"INF2"
285,"C6orf48"
286,"MICA"
287,"TBC1D8"
288,"TMSB4X"
289,"MLLT11"
290,"VDAC1"
291,"LBH"
292,"ARHGEF28"
293,"ERVMER34-1"
294,"ZNF737"
295,"PCDHGC3"
296,"ARHGEF25"
297,"PLCXD2"
298,"CD302"
299,"C22orf39"
300,"KCTD7"
301,"C8orf88"
302,"MRPS21"
303,"MILR1"
304,"HIST1H2BG"
305,"HIST1H3A"
306,"HIST1H2AL"
307,"HIST1H2AB"

## Sheet: signature_down
,"x"
1,"JARID2"
2,"SLC25A39"
3,"CHDH"
4,"PHLPP2"
5,"HSPA5"
6,"HERPUD1"
7,"USP36"
8,"PITHD1"
9,"SLC2A3"
10,"CDH3"
11,"FECH"
12,"DDX3Y"
13,"IDI1"
14,"CDH17"
15,"FDFT1"
16,"ATP8B1"
17,"FTL"
18,"NOP56"
19,"ADNP2"
20,"STUB1"
21,"CA2"
22,"ANKRD27"
23,"FBL"
24,"SLC1A5"
25,"SMG9"
26,"ITGB8"
27,"OGDH"
28,"ZNF330"
29,"FBXW7"
30,"RAPGEF2"
31,"SEMA5A"
32,"HMGCS1"
33,"WWC1"
34,"COL7A1"
35,"PODXL2"
36,"GALNT3"
37,"ID2"
38,"RND3"
39,"SRSF4"
40,"RCN2"
41,"PROSER1"
42,"KCNJ8"
43,"MRPS2"
44,"C4BPB"
45,"PAIP2B"
46,"RRBP1"
47,"PLEKHG3"
48,"AUNIP"
49,"PKMYT1"
50,"ZFP36"
51,"CHAC1"
52,"ILF3"
53,"AP1M2"
54,"MTUS1"
55,"AJUBA"
56,"TOMM40"
57,"GCH1"
58,"CLUH"
59,"MYBBP1A"
60,"PATJ"
61,"RIPK1"
62,"JDP2"
63,"ANP32A"
64,"EIF4A3"
65,"FEM1A"
66,"RGS16"
67,"SUSD4"
68,"CTDSP1"
69,"PPRC1"
70,"SERPINH1"
71,"EPG5"
72,"DDAH1"
73,"CXADR"
74,"UTP14A"
75,"EIF4A2"
76,"DUSP2"
77,"LAD1"
78,"ATAD3B"
79,"ZNF714"
80,"DVL3"
81,"EMC10"
82,"SLC16A14"
83,"TGFA"
84,"EOGT"
85,"PPP4R2"
86,"SMIM14"
87,"OTUD4"
88,"PRMT9"
89,"FABP5"
90,"PDP1"
91,"NOL6"
92,"CCNDBP1"
93,"MYO5B"
94,"PRDX2"
95,"MFSD2A"
96,"EFNA1"
97,"IFFO2"
98,"PPID"
99,"ENC1"
100,"RRM2"
101,"TLN2"
102,"SYT12"
103,"BDNF"
104,"MAGED1"
105,"RCC1"
106,"YOD1"
107,"CLDN7"
108,"TMEM30B"
109,"UTY"
110,"IFITM2"
111,"ANKRD46"
112,"MAN2A2"
113,"ZNF460"
114,"ZNF511"
115,"SP5"
116,"HSPA1B"
117,"TENM3"
118,"SLC12A8"
119,"ERCC6"
120,"PNMA2"
121,"CEBPA"
122,"EPOP"
123,"HIST1H3D"
