# Supplementary material for: Decoding mechanism of action and sensitivity to drug candidates from integrated transcriptome and chromatin state
Source: eLife. 2022 Aug 31;11:e78012. doi: 10.7554/eLife.78012 (PMC9433094; doi:10.7554/eLife.78012)
Supplement: Supplementary file 6. — For each cell line, predicted sensitivity scores based on our perturbation-informed signature (signature SS), a random one (random SS), a control one based on top up and down log2FC differential expression (DE) genes between BxPC-3 and HCT-15 (topFC SS) were also reported. [file elife-78012-supp6.xlsx]

## Sheet: Sheet1
Cell line	Viability decrease	SD	signature SS	random SS	topFC SS
HEK-s93	30.3	15.1	-0.32	0.14	-0.16
NTERA-2	52.5	6.14	-0.23	-0.11	-0.18
SH-SY5Y	66.4	4.61	0.04	0.07	0.18
A-431	64.8	7.54	-0.13	0.01	-0.68
A549	91.1	2.85	0.16	0.07	0.12
PC-3	70.3	0.14	0.26	0.13	0.2
SD: standard deviation
signature SS: perturbation-informed signature sensitivity score
random SS: random signature sensitivity score
topFC SS: top up and down log2FC control signature sensitivity score
