# Supplementary material for: Decoding mechanism of action and sensitivity to drug candidates from integrated transcriptome and chromatin state
Source: eLife. 2022 Aug 31;11:e78012. doi: 10.7554/eLife.78012 (PMC9433094; doi:10.7554/eLife.78012)
Supplement: Supplementary file 7. [file elife-78012-supp7.xlsx]

## Sheet: signature_top_down
,"x"
1,"OLR1"
2,"DDX3Y"
3,"MAL2"
4,"CDH1"
5,"TMEM52B"
6,"EIF1AY"
7,"KDM5D"
8,"S100A14"
9,"LAD1"
10,"FAM83F"
11,"PITX2"
12,"TBX3"
13,"USP9Y"
14,"ZNF544"
15,"GRHL2"
16,"KCNJ8"
17,"ST14"
18,"MARVELD3"
19,"ADNP2"
20,"EPHA1"
21,"IRF6"
22,"IGFBP2"
23,"UTY"
24,"ASCL2"
25,"TMEM125"
26,"BSPRY"
27,"ALDH1L1"
28,"NLRP2"
29,"PODXL2"
30,"RAB25"
31,"ZFY"
32,"ATP2C2"
33,"SLC12A8"
34,"C2orf54"
35,"KDM6A"
36,"CRACR2A"
37,"AXIN2"
38,"DUSP2"
39,"PUDP"
40,"CLDN4"
41,"CDH3"
42,"ZFP30"
43,"SLC47A1"
44,"PARD6G"
45,"CRB3"
46,"SELENBP1"
47,"SBSPON"
48,"TMSB4Y"
49,"TMEM30B"
50,"PRSS8"
51,"QPRT"
52,"RGS16"
53,"CRABP2"
54,"KIF26A"
55,"BICDL2"
56,"PRR15L"
57,"GPRIN2"
58,"FLT1"
59,"SP5"
60,"TNNT2"
61,"FGF9"
62,"FXYD3"
63,"TLR2"
64,"MACC1"
65,"EPPK1"
66,"CLDN7"
67,"GALNT3"
68,"C1orf210"
69,"TSTD1"
70,"HOXA11"
71,"JUP"
72,"CCL26"
73,"SUSD4"
74,"UNC13D"
75,"ARMCX4"
76,"ANXA3"
77,"AP1M2"
78,"TRIM58"
79,"DIRAS2"
80,"IGFL4"
81,"RAB11FIP4"
82,"SH3GL2"
83,"OVOL1"
84,"CXADR"
85,"PRSS22"
86,"NANOS1"
87,"ZNF577"
88,"CST6"
89,"IFITM2"
90,"LPAR2"
91,"FAM160A1"
92,"MAPK13"
93,"C4BPB"
94,"ATP6V1C2"
95,"MPP7"
96,"ABAT"
97,"NIPAL1"
98,"RHOV"
99,"SOWAHB"
100,"BAMBI"
101,"KLHDC8B"
102,"SLC2A3"
103,"SEMA5A"
104,"ZNF607"
105,"ZFP36"
106,"MEST"
107,"DTX4"
108,"TMC4"
109,"SPINT1"
110,"EXPH5"
111,"BMP4"
112,"HOOK2"
113,"EEF1A2"
114,"ERICH5"
115,"C9orf66"
116,"ARID5B"
117,"ZNF714"
118,"GLS2"
119,"KCNK2"
120,"ID3"
121,"ZNF165"
122,"C9orf64"
123,"CHMP2B"

## Sheet: signature_top_up
,"x"
1,"VIM"
2,"TM4SF18"
3,"SHISA2"
4,"SLFN11"
5,"KCNJ15"
6,"ANO6"
7,"IGFBP7"
8,"RAB31"
9,"VNN1"
10,"JAM3"
11,"LYPD1"
12,"VNN2"
13,"ELOVL5"
14,"SLC15A1"
15,"GNB4"
16,"GNG11"
17,"SGCE"
18,"SPART"
19,"VCAN"
20,"MSRB3"
21,"AMOTL1"
22,"BMP7"
23,"FNDC4"
24,"USH1C"
25,"KLHL4"
26,"FERMT2"
27,"STC2"
28,"CYP3A5"
29,"MMP7"
30,"PEG10"
31,"AFAP1L1"
32,"EMB"
33,"SELL"
34,"BST2"
35,"UPK1B"
36,"TUSC3"
37,"ADGRL2"
38,"EDIL3"
39,"GBP2"
40,"SPP1"
41,"BNIP3"
42,"BCAT1"
43,"CPNE8"
44,"CLEC2B"
45,"AGR2"
46,"C16orf45"
47,"IGF2"
48,"PIK3CG"
49,"RAB32"
50,"NRIP3"
51,"CAVIN3"
52,"CHST15"
53,"ZNF300"
54,"CFH"
55,"ADIRF"
56,"CD109"
57,"SYNE1"
58,"HAVCR1"
59,"ITPRIPL1"
60,"HNMT"
61,"EXO5"
62,"SLC3A1"
63,"TBXAS1"
64,"VAV3"
65,"MSN"
66,"C8orf88"
67,"GBP1"
68,"ADGRF1"
69,"EPHA4"
70,"MPDZ"
71,"FAT4"
72,"IFI16"
73,"GNG4"
74,"CARD16"
75,"TM4SF1"
76,"NCKAP1L"
77,"ZNF347"
78,"RGS17"
79,"IL31RA"
80,"NID1"
81,"SLC6A15"
82,"FGF13"
83,"TMEM156"
84,"GCNT2"
85,"KCNN4"
86,"FHL1"
87,"MMP1"
88,"H2AFJ"
89,"NUDT11"
90,"C14orf105"
91,"PTPRM"
92,"CAPN8"
93,"SMO"
94,"PIWIL1"
95,"COL6A3"
96,"FSTL1"
97,"ZNF302"
98,"ZNF134"
99,"CHFR"
100,"DKK3"
101,"ANO5"
102,"PKIA"
103,"RNF128"
104,"LIN7A"
105,"GLIPR1"
106,"SLC35G2"
107,"MEIS1"
108,"ZYG11A"
109,"CHST10"
110,"TLR4"
111,"B3GALT5"
112,"SLFN13"
113,"RPL39L"
114,"CAVIN2"
115,"NT5E"
116,"ZNF512"
117,"ADAMTS3"
118,"AHNAK2"
119,"CD40"
120,"IGFBP1"
121,"MTERF1"
122,"FXYD2"
123,"BICC1"
124,"AMIGO2"
125,"ZNF772"
126,"CHSY3"
127,"ASB9"
128,"ADRB2"
129,"GCKR"
130,"LRRK2"
131,"CALB2"
132,"DFNA5"
133,"AC007325.2"
134,"ZNF506"
135,"GNA15"
136,"MYEF2"
137,"EPHA7"
138,"ZNF528"
139,"PADI3"
140,"LIFR"
141,"MIPOL1"
142,"LONRF2"
143,"ZNF287"
144,"CRISPLD1"
145,"PRKAA2"
146,"SPAG16"
147,"AKR1C1"
148,"RERG"
149,"CYP27C1"
150,"SLC22A3"
151,"GALNT14"
152,"MPV17L"
153,"SHROOM4"
154,"TMPRSS15"
155,"TRHDE"
156,"CMKLR1"
157,"NNMT"
158,"PRDM8"
159,"ALDH1A1"
160,"DPYSL3"
161,"SLC38A4"
162,"OSMR"
163,"CHST4"
164,"SFMBT2"
165,"GRIN2A"
166,"HIST1H2BI"
167,"THBS2"
168,"PCDH9"
169,"SLFN5"
170,"ZNF530"
171,"TMEM47"
172,"COL4A5"
173,"RASSF2"
174,"COL6A2"
175,"ARMC4"
176,"SUSD5"
177,"SAMD9L"
178,"SLC35F3"
179,"RHBDL2"
180,"TBX18"
181,"HTRA1"
182,"ZNF595"
183,"C11orf70"
184,"ZNF501"
185,"HKDC1"
186,"AKR1C3"
187,"HIST1H2BG"
188,"SLC16A7"
189,"NRG2"
190,"KLHL13"
191,"MCC"
192,"TUSC1"
193,"MRI1"
194,"DRD1"
195,"NSUN7"
196,"MEGF6"
197,"BCHE"
198,"VSIG1"
199,"ZNF737"
200,"MOXD1"
201,"SOX5"
202,"PYCARD"
203,"IL13RA2"
204,"KRT5"
205,"ZNF304"
206,"GBP4"
207,"MYLK"
208,"ANK1"
209,"ZDBF2"
210,"NLGN1"
211,"MAP9"
212,"GUCY1B3"
213,"TRPV2"
214,"TNFSF10"
215,"TLR6"
216,"SYTL5"
217,"FAM129A"
218,"ANTXR1"
219,"SEMA3C"
220,"WFDC1"
221,"C17orf51"
222,"THRB"
223,"GREB1L"
224,"DACT2"
225,"FBN1"
226,"ZNF155"
227,"CD302"
228,"IRAK3"
229,"PMEPA1"
230,"ZNF502"
231,"SYDE1"
232,"PLCH2"
233,"CD44"
234,"STC1"
235,"CHST2"
236,"PLIN2"
237,"FOXL2"
238,"ZNF665"
239,"ANPEP"
240,"ADAMTSL1"
241,"KLHL3"
242,"ANKS4B"
243,"ZNF615"
244,"ARHGDIB"
245,"ALX1"
246,"GLRB"
247,"MB21D1"
248,"PPP2R2C"
249,"HIST1H2BH"
250,"CACNA2D1"
251,"PRTG"
252,"THBD"
253,"CAMK4"
254,"ZNF483"
255,"CDH2"
256,"B4GALNT4"
257,"CAV1"
258,"ZNF556"
259,"C3orf14"
260,"FREM2"
261,"ZNF350"
262,"FOXA2"
263,"ZNF548"
264,"BMP6"
265,"NRG1"
266,"PRAME"
267,"SEMA3E"
268,"MCTP1"
269,"NCKAP5"
270,"ZNF879"
271,"CARD11"
272,"POF1B"
273,"ZNF525"
274,"TLL1"
275,"DSEL"
276,"SDC2"
277,"ZNF22"
278,"RGS20"
279,"F2RL2"
280,"GIMAP2"
281,"ETS1"
282,"GHR"
283,"LOX"
284,"GRAMD1B"
285,"EYA1"
286,"HCAR1"
287,"HLA-DRB1"
288,"MME"
289,"LAMA4"
290,"EBF3"
291,"CSTA"
292,"PTPRH"
293,"C3orf67"
294,"SLIT2"
295,"AKR1B1"
296,"KHDC1"
297,"SNAI2"
298,"SOX2"
299,"FAM155A"
300,"CASP1"
301,"HSD17B2"
302,"ZNF486"
303,"FABP6"
304,"PROCR"
305,"AKR1C2"
306,"SNCAIP"
307,"GPR87"

## Sheet: random_signature_up
,"x"
1,"OR10P1"
2,"AQP12A"
3,"TYR"
4,"UGT1A10"
5,"SEH1L"
6,"SDR16C5"
7,"PDIA5"
8,"CHST14"
9,"NRIP2"
10,"QKI"
11,"THAP6"
12,"C18orf21"
13,"CIART"
14,"ZNF350"
15,"TMEM219"
16,"PROSER2"
17,"KRTAP10-11"
18,"OVOL1"
19,"RHD"
20,"OR52E8"
21,"PGRMC2"
22,"UNC45B"
23,"NOS2"
24,"NOS1"
25,"LRIG3"
26,"HEMK1"
27,"MOB2"
28,"RAB3C"
29,"FBXO39"
30,"MAP3K20"
31,"TRIM64C"
32,"CLDN5"
33,"STEAP4"
34,"ZNF600"
35,"SLC35F1"
36,"TEX52"
37,"ZBED3"
38,"DFFA"
39,"MS4A10"
40,"DCDC2C"
41,"REN"
42,"RASA3"
43,"DNAJC30"
44,"RPS2"
45,"SLX4"
46,"PLAA"
47,"BCL6B"
48,"KCNJ10"
49,"PECR"
50,"ADAM2"
51,"CHST12"
52,"SST"
53,"RASL11A"
54,"NAP1L5"
55,"GDNF"
56,"ZNF324B"
57,"AC004691.2"
58,"GTSE1"
59,"CSRP1"
60,"MTCH2"
61,"CPEB1"
62,"URB2"
63,"PRPF8"
64,"ROBO3"
65,"BEST3"
66,"CDCA8"
67,"WRNIP1"
68,"ODF3B"
69,"DFFB"
70,"ENDOV"
71,"NUDCD2"
72,"INTS12"
73,"SOWAHA"
74,"PHF11"
75,"RANBP10"
76,"KY"
77,"MAPRE1"
78,"STON1"
79,"LCE2B"
80,"ACTC1"
81,"SLC22A18AS"
82,"CLTRN"
83,"RASGEF1C"
84,"GALNT5"
85,"HIST1H2AB"
86,"CCDC170"
87,"HTR2A"
88,"MARK2"
89,"SNAP29"
90,"SRGAP3"
91,"NUTM2D"
92,"COL6A3"
93,"MUT"
94,"KHDRBS1"
95,"CILP"
96,"AK9"
97,"CCDC114"
98,"TOB2"
99,"RHBDD3"
100,"MYCBPAP"
101,"CRYBG2"
102,"CCDC106"
103,"PPP2R5C"
104,"VEZF1"
105,"DYRK1B"
106,"SLC6A1"
107,"NOG"
108,"PADI4"
109,"CDIPT"
110,"ZNF723"
111,"RANBP2"
112,"PER3"
113,"SLC16A4"
114,"CACNA2D2"
115,"KRTAP5-9"
116,"CLEC2D"
117,"CCNI"
118,"TNP2"
119,"TMEM204"
120,"SHH"
121,"DRC7"
122,"DGKI"
123,"FAM19A5"
124,"BLNK"
125,"EFR3B"
126,"RBMXL2"
127,"ZNF229"
128,"ABTB1"
129,"PCYT1A"
130,"AIFM1"
131,"NHS"
132,"HOXB6"
133,"EHD1"
134,"ARHGAP15"
135,"GPR88"
136,"GIPC2"
137,"IL11RA"
138,"C19orf70"
139,"RABL3"
140,"ADCY1"
141,"ARRDC2"
142,"C7orf25"
143,"RPL36A-HNRNPH2"
144,"CCL13"
145,"GLTPD2"
146,"MATN3"
147,"DEFB103B"
148,"ATP2B4"
149,"OR6C6"
150,"PCDHGB4"
151,"CDYL2"
152,"ERH"
153,"DR1"
154,"MAT2A"
155,"HMGN2"
156,"AHSG"
157,"RYK"
158,"ING1"
159,"NPAS4"
160,"FUT9"
161,"MXD3"
162,"NRBP2"
163,"OR14J1"
164,"SIDT2"
165,"S100A7"
166,"ADCY7"
167,"COX14"
168,"N6AMT1"
169,"CETN2"
170,"GUF1"
171,"AL034430.1"
172,"NRGN"
173,"ACTBL2"
174,"EAPP"
175,"FHOD1"
176,"SMIM36"
177,"PLP2"
178,"PRR35"
179,"MYRFL"
180,"PC"
181,"FBXO28"
182,"COX6B1"
183,"ZNF180"
184,"UQCRC1"
185,"ABCA13"
186,"OR13C4"
187,"EME1"
188,"DACT3"
189,"HIST2H2BE"
190,"MYL6B"
191,"MRPL18"
192,"CORO2B"
193,"GJE1"
194,"EMX1"
195,"BICRAL"
196,"SMLR1"
197,"MAFB"
198,"NTRK3"
199,"FCRLA"
200,"NXPH3"
201,"CEL"
202,"MAN2B2"
203,"RIN2"
204,"LGMN"
205,"CAMTA2"
206,"AL672043.1"
207,"HAUS3"
208,"HELZ2"
209,"CCDC152"
210,"GOLGA6L22"
211,"BMPR1B"
212,"CUTA"
213,"KRT79"
214,"OR2H2"
215,"SOAT2"
216,"HEXIM1"
217,"SCN4B"
218,"DNAH10"
219,"FLT1"
220,"ADGRE1"
221,"PATE3"
222,"IFIH1"
223,"C16orf95"
224,"PRSS40B"
225,"MYOM1"
226,"CCDC158"
227,"RNF139"
228,"CPNE4"
229,"HHLA1"
230,"WIPI2"
231,"ITIH5"
232,"RBMX2"
233,"PSMC3IP"
234,"TUBB1"
235,"SIGIRR"
236,"NMNAT3"
237,"SRSF12"
238,"CALY"
239,"RBBP8NL"
240,"CSF1"
241,"STARD3"
242,"SAA2"
243,"CPN1"
244,"MAST2"
245,"GPKOW"
246,"SEPT8"
247,"ASPA"
248,"TAF9B"
249,"TBC1D23"
250,"BACE2"
251,"SNCB"
252,"TEX51"
253,"IFT27"
254,"ZNF774"
255,"NKAIN4"
256,"DLG2"
257,"SLCO1B1"
258,"DEFB113"
259,"NEK3"
260,"TOMM20"
261,"DEPDC4"
262,"TBCD"
263,"XCL1"
264,"HIST1H2AK"
265,"TTC32"
266,"NUP160"
267,"OGDHL"
268,"MGAT5"
269,"POTEH"
270,"OMD"
271,"ATL1"
272,"GIMD1"
273,"EEF1AKMT3"
274,"PGAM4"
275,"DUS2"
276,"GNL3L"
277,"ANXA2"
278,"CELA3A"
279,"FBXL13"
280,"PRAMEF8"
281,"ADAMTS19"
282,"HERC3"
283,"ABCB8"
284,"RBMY1F"
285,"WASL"
286,"ABCA5"
287,"DNAJC21"
288,"KCNE1"
289,"CARS"
290,"TGM1"
291,"BEND2"
292,"WDR87"
293,"SETD3"
294,"CHDH"
295,"MAP1LC3B"
296,"HTRA1"
297,"RIPOR1"
298,"CPA5"
299,"CEP95"
300,"ALG1L2"
301,"XKR3"
302,"DDX1"
303,"EIF3B"
304,"TTC12"
305,"HAX1"
306,"ZBTB43"
307,"ARNT"

## Sheet: random_signature_down
,"x"
1,"APLNR"
2,"KLHDC3"
3,"LINGO4"
4,"BCAP29"
5,"MYOT"
6,"KCNE1"
7,"STK10"
8,"SLC2A2"
9,"PTPN1"
10,"TOP1"
11,"BABAM2"
12,"TAPT1"
13,"AURKB"
14,"XAGE1A"
15,"PMP22"
16,"RBFOX2"
17,"C8A"
18,"TVP23C"
19,"PCDHB2"
20,"NCKIPSD"
21,"SUPT4H1"
22,"CLDND1"
23,"CELF1"
24,"CKLF-CMTM1"
25,"LSM5"
26,"TNNI2"
27,"SGK2"
28,"AC073610.2"
29,"PIAS1"
30,"ARIH2"
31,"TRAM2"
32,"CAVIN3"
33,"RASD1"
34,"B3GALNT1"
35,"CCT5"
36,"COPS3"
37,"IRS4"
38,"LEMD1"
39,"CCT6B"
40,"F13A1"
41,"TESK1"
42,"CD177"
43,"PXMP2"
44,"MYB"
45,"TGFA"
46,"TBR1"
47,"AC011043.2"
48,"SELENBP1"
49,"ECT2L"
50,"ANXA10"
51,"FCN3"
52,"NT5C1B"
53,"FUNDC2"
54,"WDR4"
55,"DAZL"
56,"CENPBD1"
57,"DARS2"
58,"KRTAP20-3"
59,"DAPK1"
60,"TAZ"
61,"DNAH10OS"
62,"CD19"
63,"ATXN7L3B"
64,"FRRS1L"
65,"TSPAN9"
66,"XCL1"
67,"PLIN4"
68,"FSTL1"
69,"SHARPIN"
70,"ZNF506"
71,"GPRASP1"
72,"FES"
73,"PRRX2"
74,"USP24"
75,"HEATR3"
76,"CCL1"
77,"STMN2"
78,"ATG9A"
79,"TEX51"
80,"SLC10A3"
81,"DENND2C"
82,"DHH"
83,"SERTAD4"
84,"ALDH2"
85,"LAMTOR4"
86,"XYLT1"
87,"GGN"
88,"LRPPRC"
89,"MRPS36"
90,"SRRT"
91,"PAPD4"
92,"DEFB112"
93,"HIST1H2AC"
94,"GTF3C4"
95,"FLI1"
96,"C17orf98"
97,"SERPINA6"
98,"HAUS2"
99,"ADAM10"
100,"RAB39A"
101,"CHD7"
102,"HLA-DRB5"
103,"CDC40"
104,"FRS3"
105,"PGK1"
106,"TUBA1A"
107,"NFKBIZ"
108,"ZIC4"
109,"HCN3"
110,"HCAR2"
111,"DUSP8"
112,"VIPR1"
113,"OR2A12"
114,"CXCL5"
115,"AL136295.1"
116,"CLPX"
117,"RPS14"
118,"ZNF451"
119,"ARHGAP30"
120,"CDON"
121,"DHFR"
122,"OR4X2"
123,"UBE2F"
