# Supplementary material for: Decoding mechanism of action and sensitivity to drug candidates from integrated transcriptome and chromatin state
Source: eLife. 2022 Aug 31;11:e78012. doi: 10.7554/eLife.78012 (PMC9433094; doi:10.7554/eLife.78012)
Supplement: Supplementary file 8. [file elife-78012-supp8.xlsx]

## Sheet: signature_down
,"x"
1,"PDK4"
2,"THSD7A"
3,"ETV1"
4,"ARSD"
5,"MGST1"
6,"CD9"
7,"ANLN"
8,"MAMLD1"
9,"SNAI2"
10,"SAMD4A"
11,"BIRC3"
12,"DEPDC1"
13,"SLC4A7"
14,"VCL"
15,"TRIO"
16,"VCAN"
17,"KITLG"
18,"FOXC1"
19,"DCBLD2"
20,"PKP2"
21,"TBXAS1"
22,"PRDM6"
23,"LIMCH1"
24,"SPA17"
25,"HIPK2"
26,"SNX24"
27,"SLK"
28,"FAM107B"
29,"ME1"
30,"MSANTD3"
31,"NAV3"
32,"PTPN21"
33,"ALDH3A2"
34,"P4HA2"
35,"GLI2"
36,"MGLL"
37,"NTN4"
38,"NUAK1"
39,"SEMA3C"
40,"RASAL2"
41,"FNDC3B"
42,"PLD1"
43,"RBMS2"
44,"SLC46A1"
45,"PLXNA2"
46,"TP73"
47,"OPHN1"
48,"CARMIL1"
49,"EPB41L2"
50,"MOK"
51,"CADPS2"
52,"PLOD1"
53,"APLP2"
54,"WNT11"
55,"PIR"
56,"DOCK9"
57,"PXN"
58,"DHX32"
59,"LAMB1"
60,"TGFB2"
61,"NRP1"
62,"PNPLA3"
63,"RIN3"
64,"SIX4"
65,"PROCR"
66,"PTK6"
67,"FERMT1"
68,"PLS3"
69,"ASB9"
70,"TIMP1"
71,"KLHL4"
72,"KLF5"
73,"ZNF629"
74,"SETD6"
75,"CPQ"
76,"IL7"
77,"KCNN4"
78,"SYDE1"
79,"MET"
80,"TSPAN12"
81,"COBL"
82,"AMBP"
83,"NCS1"
84,"DNMBP"
85,"DKK1"
86,"TBC1D12"
87,"RAB34"
88,"AREG"
89,"SH3D19"
90,"ARHGEF17"
91,"KIAA1549L"
92,"CAPRIN2"
93,"TBC1D30"
94,"FRK"
95,"PERP"
96,"ADGRG6"
97,"PHACTR2"
98,"LOX"
99,"HAVCR1"
100,"RASGRF2"
101,"WWC1"
102,"DPYSL3"
103,"STC2"
104,"FRMD4B"
105,"UPK1B"
106,"PLCH1"
107,"VIPR1"
108,"RTKN"
109,"STEAP3"
110,"GPD2"
111,"MLPH"
112,"RND3"
113,"EPHA4"
114,"WLS"
115,"CNN3"
116,"NRP2"
117,"RAB32"
118,"MTERF2"
119,"CLU"
120,"FKBP9"
121,"CHST3"
122,"BICC1"
123,"RASSF8"
124,"SDC4"
125,"TRERF1"
126,"AHNAK"
127,"EFNB2"
128,"SOX9"
129,"GNG11"
130,"HIP1"
131,"PTPN12"
132,"A4GALT"
133,"DOCK4"
134,"NXNL2"
135,"STARD8"
136,"SH3BP4"
137,"DOCK6"
138,"AFDN"
139,"COL5A1"
140,"LAMA5"
141,"SYNE1"
142,"ZNF141"
143,"MAP1B"
144,"IL13RA1"
145,"TNS4"
146,"SPATA6"
147,"AP3B1"
148,"LGR6"
149,"MORC4"
150,"LARGE1"
151,"EMP1"
152,"EPHA7"
153,"NHSL1"
154,"TNS3"
155,"ALDH1B1"
156,"KIF13A"
157,"GMPR"
158,"RDX"
159,"UACA"
160,"IFI44"
161,"TACC2"
162,"SSFA2"
163,"SCARB2"
164,"FGD4"
165,"AMIGO2"
166,"DUSP6"
167,"GAS2L3"
168,"GALNT6"
169,"CPNE2"
170,"GREB1L"
171,"SECTM1"
172,"GRB7"
173,"NBPF3"
174,"ZNF697"
175,"CTTNBP2NL"
176,"TUFT1"
177,"CEP170"
178,"EML4"
179,"MALL"
180,"GULP1"
181,"OSBPL10"
182,"PTPRG"
183,"MYO10"
184,"ARHGAP26"
185,"DCDC2"
186,"CREB5"
187,"EGFR"
188,"IGFBP3"
189,"IGFBP1"
190,"TMEM47"
191,"SYTL5"
192,"TRIM55"
193,"NACC2"
194,"FAM171A1"
195,"ANKRD1"
196,"ADM"
197,"HSD17B12"
198,"TNKS1BP1"
199,"PTPRJ"
200,"FEZ1"
201,"MPZL2"
202,"SOGA1"
203,"HMGA2"
204,"TMCO3"
205,"DOCK1"
206,"CRIM1"
207,"MIPOL1"
208,"ME3"
209,"PTPN14"
210,"FARP1"
211,"LMNTD1"
212,"PLOD2"
213,"ADGRF1"
214,"ASAP1"
215,"CMTM7"
216,"CNKSR3"
217,"CACNA2D1"
218,"UBASH3B"
219,"NRGN"
220,"KLF10"
221,"PSD3"
222,"SFR1"
223,"CD109"
224,"NRG1"
225,"MMP14"
226,"TNFRSF14"
227,"DZIP1L"
228,"RNF207"
229,"SHROOM4"
230,"PPP1R9A"
231,"DUSP23"
232,"PTMS"
233,"ZYX"
234,"IL6R"
235,"LY6K"
236,"SHANK2"
237,"LRP5"
238,"SNX7"
239,"KCNT2"
240,"CAPN2"
241,"DUSP19"
242,"VSNL1"
243,"S100A11"
244,"ANTXR2"
245,"INAVA"
246,"TGFBR2"
247,"NUAK2"
248,"PTPN13"
249,"CDCP1"
250,"SGMS2"
251,"EDIL3"
252,"GPX8"
253,"TLR3"
254,"FOXQ1"
255,"DCBLD1"
256,"STEAP1"
257,"SHH"
258,"HNF4G"
259,"EN2"
260,"ALDH7A1"
261,"HDX"
262,"CDX2"
263,"ARHGAP42"
264,"CLMN"
265,"ADAMTS15"
266,"PCBD1"
267,"CYB5R2"
268,"NAV2"
269,"ZNF283"
270,"SCARA3"
271,"SLC16A4"
272,"LRP1B"
273,"ADRB2"
274,"PTK2"
275,"RASSF6"
276,"MT1E"
277,"PCDH7"
278,"TPST1"
279,"ALCAM"
280,"DENND5B"
281,"SMAGP"
282,"GPR37"
283,"CAVIN3"
284,"PRNP"
285,"MACROD2"
286,"GNG12"
287,"TCEAL1"
288,"SMPDL3A"
289,"PTPRM"
290,"GOLIM4"
291,"CTBP2"
292,"CSRP2"
293,"NRIP3"
294,"MCTP1"
295,"DENND2C"
296,"SYNE3"
297,"MYO1D"
298,"FOXL1"
299,"NCKAP5"
300,"WSB2"
301,"FAM109B"
302,"JUN"
303,"ALS2CL"
304,"PLEC"
305,"CDC42EP4"
306,"ARL14"
307,"TMEM64"
308,"NQO1"
309,"ZBTB20"
310,"ZNF329"
311,"TSHZ2"
312,"SPNS2"
313,"GAS6"
314,"RIPK4"
315,"ST6GALNAC3"
316,"EFNA5"
317,"MAML2"
318,"IRS2"
319,"RASA3"
320,"PRELID2"
321,"THBS2"
322,"CYP27C1"
323,"TRABD2A"
324,"TEAD1"
325,"MITF"
326,"EIF4EBP1"
327,"WNT7B"
328,"NHS"
329,"SPATS2L"
330,"SULF2"
331,"HRH1"
332,"COL27A1"
333,"ARHGEF12"
334,"PDLIM7"
335,"SRGAP1"
336,"FAM3C"
337,"KIAA1671"
338,"SVIL"
339,"PDGFA"
340,"COL13A1"
341,"HIST4H4"
342,"SOWAHC"
343,"HYLS1"
344,"RYR2"
345,"TUSC1"
346,"CDC42BPB"
347,"SHISA4"
348,"TGM2"
349,"SPIN3"
350,"LGR4"
351,"MT1A"
352,"CLIC1"
353,"CEBPD"
354,"APOBEC3G"
355,"CCDC169"
356,"FMN1"
357,"CARD18"
358,"ZNF253"
359,"TXNIP"
360,"HIST1H2BG"
361,"HIST1H2BE"
362,"HIST1H2BH"
363,"HIST1H2AE"

## Sheet: signature_up
,"x"
1,"GAS7"
2,"JARID2"
3,"TRAF3IP3"
4,"PRKCH"
5,"EPHA3"
6,"PREX2"
7,"NEXMIF"
8,"TRO"
9,"ACAP1"
10,"ADD2"
11,"APBB1IP"
12,"TNRC6C"
13,"TCF7"
14,"CD40LG"
15,"ZDHHC15"
16,"SMPD3"
17,"CDK6"
18,"FBXO24"
19,"GLRB"
20,"PPM1H"
21,"BVES"
22,"ST8SIA4"
23,"TFDP2"
24,"PEX5L"
25,"IGFBP2"
26,"SIPA1L2"
27,"CD48"
28,"TNFSF4"
29,"ELOVL4"
30,"EPHX2"
31,"TMEM131L"
32,"SV2C"
33,"TWIST1"
34,"PEX6"
35,"SH3TC1"
36,"BHLHE23"
37,"HOXD13"
38,"ALDH1A2"
39,"PXDN"
40,"ZNF331"
41,"DOCK2"
42,"DZIP1"
43,"DTX1"
44,"DOCK10"
45,"USP44"
46,"PHF11"
47,"RCBTB2"
48,"NOVA1"
49,"PELI2"
50,"SH3GL3"
51,"PTPN7"
52,"GZMA"
53,"ADAMTS19"
54,"INA"
55,"CNKSR2"
56,"ARID5B"
57,"GFRA1"
58,"POU4F1"
59,"CAMK4"
60,"ZNF117"
61,"ELMO1"
62,"SSBP3"
63,"EPB41"
64,"SV2A"
65,"RUNX1"
66,"CD3G"
67,"TAL1"
68,"PM20D1"
69,"GPR155"
70,"KBTBD8"
71,"ADCY1"
72,"GLB1L3"
73,"TUB"
74,"PRKCB"
75,"MAP1A"
76,"RCOR2"
77,"NLRC3"
78,"RNF150"
79,"MAL"
80,"IL16"
81,"ARPP21"
82,"CHRNA9"
83,"DPY19L2"
84,"CD28"
85,"MKRN3"
86,"HCLS1"
87,"ARHGAP45"
88,"TSPYL5"
89,"YOD1"
90,"POU3F2"
91,"IKZF1"
92,"INSIG1"
93,"ZSCAN23"
94,"BEND4"
95,"FHIT"
96,"PLEKHG4"
97,"ZNF569"
98,"SULT1A1"
99,"ZNF71"
100,"DNM3"
101,"ZNF583"
102,"PAX9"
103,"FAM133B"
104,"HIST1H3G"
105,"HIST1H4I"
106,"HIST1H2BF"
107,"HIST1H2BI"
