# Supplementary material for: Decoding mechanism of action and sensitivity to drug candidates from integrated transcriptome and chromatin state
Source: eLife. 2022 Aug 31;11:e78012. doi: 10.7554/eLife.78012 (PMC9433094; doi:10.7554/eLife.78012)
Supplement: Supplementary file 9. — For each cell line, predicted sensitivity scores based on our perturbation-informed signature are reported (signature SS). [file elife-78012-supp9.xlsx]

## Sheet: Sheet1
Cell line	IC50 (uM)	signature SS
A549	18.9	-0.48
Daudi	2.66	0.55
GAMG	46.2	-0.44
HDLM-2	15.2	0.45
HeLa	46.1	-0.31
HL-60	2.48	0.59
MOLT-4	1.96	1.17
REH	2.95	0.84
RPMI-8226	10.5	0.53
RT4	15.9	-0.38
WM-115	15.9	-0.13
IC50: cytotoxicity IC50 after 72 h treatment.
signature SS: perturbation-informed signature sensitivity score
